# Supplementary material for: From rivers to ocean basins: The role of ocean barriers and philopatry in the genetic structuring of a cosmopolitan coastal predator
Source: PubMed Central journal article supplement (PMC9944188; doi:10.1002/ece3.9837), 2023-02-22
Supplement: ECE3-13-e9837-s001.pdf [file ECE3-13-e9837-s001.pdf]

## Supplemental Information for:

From rivers to ocean basins: the role of ocean barriers and philopatry  
in the genetic structuring of a cosmopolitan marine predator

Floriaan Devloo-Delva\*, Christopher P. Burr ridge, Peter M. Kyne,  
Juerg M. Brunnschweiler, Demian D. Chapman, Patricia Charvet, Xiao Chen,  
Jeremy Cliff, Ryan Daly, J. Marcus Drymon, Mario Espinoza, Daniel Fernando,  
Laura Garcia Barcia, Kerstin Glaus, Blanca Idalia González Garza, Michael I Grant,  
Rasanthi M. Gunasekera, Sebastian I. Hernandez, Susumu Hyodo, Rima W. Jabado,  
Sébastien Jaquemet, Grant Johnson, James T. Ketchum, H el ene Magalon,  
James R. Marthick, Frederik H. Mollen, Stefano Mona, Gavin J.P. Naylor,  
John E.G. Nevill, Nicole M. Phillips, Richard D. Pillans, Bautisse D. Postaire,  
Amy F. Smoothey, Katsunori Tachihara, Bree J. Tillet, Jorge A. Valerio-Vargas,  
and Pierre Feutry

\* *Author produced this Rmarkdown*

December, 2022

## Contents

|          |                                     |           |
|----------|-------------------------------------|-----------|
| <b>1</b> | <b>Background</b>                   | <b>5</b>  |
| <b>2</b> | <b>Sampling map and metadata</b>    | <b>6</b>  |
| 2.1      | Visual sex ID . . . . .             | 6         |
| 2.2      | Total lengths . . . . .             | 7         |
| 2.3      | Aproximate Length-at-age . . . . .  | 8         |
| 2.3.1    | Catch date . . . . .                | 9         |
| 2.3.2    | Age . . . . .                       | 10        |
| 2.3.3    | Cohort . . . . .                    | 11        |
| <b>3</b> | <b>Load packages</b>                | <b>12</b> |
| <b>4</b> | <b>DArTseq - All data</b>           | <b>15</b> |
| 4.1      | Set strata . . . . .                | 15        |
| 4.2      | Find sex-linked markers . . . . .   | 15        |
| 4.3      | Filter data . . . . .               | 23        |
| 4.4      | Save data . . . . .                 | 24        |
| 4.5      | Load data . . . . .                 | 25        |
| 4.6      | Remove sex-linked markers . . . . . | 25        |
| 4.7      | PCA to identify species . . . . .   | 26        |
| <b>5</b> | <b>DArTseq - Only Bull Shark</b>    | <b>32</b> |
| 5.1      | Set strata . . . . .                | 32        |
| 5.2      | Filter data . . . . .               | 32        |

|          |                                                                  |            |
|----------|------------------------------------------------------------------|------------|
| 5.3      | Save data . . . . .                                              | 32         |
| 5.4      | Load data . . . . .                                              | 33         |
| 5.5      | Remove sex-linked markers . . . . .                              | 34         |
| 5.6      | Genetic diversity . . . . .                                      | 34         |
| 5.6.1    | Number of monomorphic markers per population . . . . .           | 37         |
| 5.6.2    | Nucleotide diversity and inbreeding . . . . .                    | 37         |
| 5.7      | Genetic differentiation . . . . .                                | 39         |
| 5.8      | PCA . . . . .                                                    | 43         |
| 5.9      | DAPC . . . . .                                                   | 48         |
| 5.9.1    | Optimal number of clusters with neutral markers . . . . .        | 48         |
| 5.9.2    | Cross-validation to identify the optimal number of PCs . . . . . | 49         |
| 5.9.3    | DAPC barplot . . . . .                                           | 51         |
| 5.9.4    | DAPC scatterplot . . . . .                                       | 56         |
| 5.9.5    | DAPC scatterplot - FLO . . . . .                                 | 65         |
| <b>6</b> | <b>DArTseq - marker selection</b>                                | <b>71</b>  |
| 6.1      | Sex-linked markers . . . . .                                     | 71         |
| 6.2      | Popgen markers . . . . .                                         | 71         |
| 6.2.1    | Load data . . . . .                                              | 71         |
| 6.2.2    | Extra filters . . . . .                                          | 71         |
| 6.3      | Test selected markers . . . . .                                  | 73         |
| 6.3.1    | Load data . . . . .                                              | 74         |
| 6.3.2    | Genetic diversity . . . . .                                      | 75         |
| 6.3.3    | Genetic differentiation . . . . .                                | 80         |
| 6.3.4    | PCA . . . . .                                                    | 84         |
| <b>7</b> | <b>DATA1: DArTcap - All data</b>                                 | <b>89</b>  |
| 7.1      | Set strata . . . . .                                             | 89         |
| 7.2      | Test baiting success . . . . .                                   | 89         |
| 7.3      | Find sex-linked markers . . . . .                                | 89         |
| 7.4      | Filter data . . . . .                                            | 98         |
| 7.5      | Save data . . . . .                                              | 99         |
| 7.6      | Load data . . . . .                                              | 100        |
| 7.7      | Remove sex-linked markers . . . . .                              | 100        |
| 7.8      | PCA to identify species . . . . .                                | 101        |
| <b>8</b> | <b>DATA2: DArTcap - Only Bull Shark</b>                          | <b>109</b> |
| 8.1      | Set strata . . . . .                                             | 109        |
| 8.2      | Filter data . . . . .                                            | 109        |
| 8.2.1    | Remove extra low and high heterozygous individuals . . . . .     | 110        |
| 8.3      | Save data . . . . .                                              | 110        |
| 8.4      | Load data . . . . .                                              | 110        |
| 8.5      | Remove sex-linked markers . . . . .                              | 111        |
| 8.6      | Genetic diversity . . . . .                                      | 112        |
| 8.6.1    | Number of monomorphic markers per population . . . . .           | 119        |
| 8.6.2    | Nucleotide diversity and inbreeding . . . . .                    | 120        |
| 8.7      | Genetic differentiation . . . . .                                | 124        |
| 8.7.1    | Fst per location . . . . .                                       | 124        |
| 8.7.2    | Fst per Site . . . . .                                           | 136        |
| 8.7.3    | Fst per Region . . . . .                                         | 140        |
| 8.8      | PCA . . . . .                                                    | 142        |
| 8.9      | DAPC . . . . .                                                   | 146        |
| 8.9.1    | Optimal number of clusters with neutral markers . . . . .        | 146        |
| 8.9.2    | Cross-validation to identify the optimal number of PCs . . . . . | 147        |
| 8.9.3    | DAPC barplot . . . . .                                           | 149        |
| 8.9.4    | DAPC scatterplot . . . . .                                       | 154        |
| 8.9.5    | DAPC scatterplot - FLO . . . . .                                 | 163        |
| 8.10     | Provenance assignment . . . . .                                  | 168        |
| 8.10.1   | Per Site . . . . .                                               | 168        |

|           |                                                                          |            |
|-----------|--------------------------------------------------------------------------|------------|
| 8.10.2    | Per region . . . . .                                                     | 175        |
| 8.10.3    | Test number of informative markers chosen by DAPC contribution . . . . . | 181        |
| 8.11      | Sex-specific connectivity . . . . .                                      | 185        |
| 8.11.1    | Sex-linked markers . . . . .                                             | 185        |
| 8.11.2    | Individual-based tests by Site . . . . .                                 | 206        |
| 8.11.3    | Individual-based tests by Region . . . . .                               | 220        |
| <b>9</b>  | <b>DATA3: DArTcap - All data, subset Australia</b>                       | <b>232</b> |
| 9.1       | Set strata . . . . .                                                     | 232        |
| 9.2       | Filter data . . . . .                                                    | 232        |
| 9.2.1     | Remove extra low and high heterozygous individuals . . . . .             | 233        |
| 9.3       | Save data . . . . .                                                      | 233        |
| 9.4       | Load data . . . . .                                                      | 234        |
| 9.5       | Remove sex-linked markers . . . . .                                      | 235        |
| 9.6       | Genetic diversity . . . . .                                              | 235        |
| 9.6.1     | Number of monomorphic markers per population . . . . .                   | 238        |
| 9.6.2     | Nucleotide diversity and inbreeding . . . . .                            | 238        |
| 9.7       | Genetic differentiation . . . . .                                        | 240        |
| 9.8       | PCA . . . . .                                                            | 249        |
| 9.9       | DAPC . . . . .                                                           | 254        |
| 9.9.1     | Optimal number of clusters with neutral markers . . . . .                | 254        |
| 9.9.2     | Cross-validation to identify the optimal number of PCs . . . . .         | 255        |
| 9.9.3     | DAPC barplot . . . . .                                                   | 257        |
| 9.9.4     | DAPC scatterplot . . . . .                                               | 262        |
| 9.9.5     | DAPC scatterplot - FLO . . . . .                                         | 271        |
| <b>10</b> | <b>DATA4: DArTcap - West-Atlantic</b>                                    | <b>277</b> |
| 10.1      | Set strata . . . . .                                                     | 277        |
| 10.2      | Filter data . . . . .                                                    | 277        |
| 10.2.1    | Remove extra low and high heterozygous individuals . . . . .             | 278        |
| 10.3      | Save data . . . . .                                                      | 278        |
| 10.4      | Load data . . . . .                                                      | 278        |
| 10.5      | Remove sex-linked markers . . . . .                                      | 279        |
| 10.6      | Genetic diversity . . . . .                                              | 280        |
| 10.6.1    | Number of monomorphic markers per population . . . . .                   | 280        |
| 10.6.2    | Nucleotide diversity and inbreeding . . . . .                            | 281        |
| 10.7      | Genetic differentiation . . . . .                                        | 283        |
| 10.8      | PCA . . . . .                                                            | 285        |
| 10.9      | DAPC . . . . .                                                           | 289        |
| 10.9.1    | Optimal number of clusters with neutral markers . . . . .                | 289        |
| 10.9.2    | Cross-validation to identify the optimal number of PCs . . . . .         | 290        |
| 10.9.3    | DAPC barplot . . . . .                                                   | 292        |
| 10.9.4    | DAPC scatterplot . . . . .                                               | 297        |
| 10.9.5    | DAPC scatterplot - FLO . . . . .                                         | 306        |
| <b>11</b> | <b>DATA5: DArTcap - Indo - West Pacific</b>                              | <b>312</b> |
| 11.1      | Set strata . . . . .                                                     | 312        |
| 11.2      | Filter data . . . . .                                                    | 312        |
| 11.2.1    | Remove extra low and high heterozygous individuals . . . . .             | 313        |
| 11.3      | Save data . . . . .                                                      | 313        |
| 11.4      | Load data . . . . .                                                      | 314        |
| 11.5      | Remove sex-linked markers . . . . .                                      | 314        |
| 11.6      | Genetic diversity . . . . .                                              | 315        |
| 11.6.1    | Number of monomorphic markers per population . . . . .                   | 318        |
| 11.6.2    | Nucleotide diversity and inbreeding . . . . .                            | 318        |
| 11.7      | Genetic differentiation . . . . .                                        | 320        |
| 11.8      | PCA . . . . .                                                            | 328        |
| 11.9      | DAPC . . . . .                                                           | 332        |
| 11.9.1    | Optimal number of clusters with neutral markers . . . . .                | 332        |

|           |                                                                                         |            |
|-----------|-----------------------------------------------------------------------------------------|------------|
| 11.9.2    | Cross-validation to identify the optimal number of PCs                                  | 333        |
| 11.9.3    | DAPC barplot                                                                            | 335        |
| 11.9.4    | DAPC scatterplot                                                                        | 340        |
| 11.9.5    | DAPC scatterplot - FLO                                                                  | 349        |
| <b>12</b> | <b>DATA6: DARtcap - Indo - West Pacific: no Japan or Fiji and subset from Australia</b> | <b>355</b> |
| 12.1      | Set strata                                                                              | 355        |
| 12.2      | Filter data                                                                             | 355        |
| 12.2.1    | Remove extra low and high heterozygous individuals                                      | 356        |
| 12.3      | Save data                                                                               | 356        |
| 12.4      | Load data                                                                               | 356        |
| 12.5      | Remove sex-linked markers                                                               | 357        |
| 12.6      | Genetic diversity                                                                       | 358        |
| 12.6.1    | Number of monomorphic markers per population                                            | 359        |
| 12.6.2    | Nucleotide diversity and inbreeding                                                     | 360        |
| 12.7      | Genetic differentiation                                                                 | 361        |
| 12.8      | PCA                                                                                     | 363        |
| 12.9      | DAPC                                                                                    | 367        |
| 12.9.1    | Optimal number of clusters with neutral markers                                         | 367        |
| 12.9.2    | Cross-validation to identify the optimal number of PCs                                  | 368        |
| 12.9.3    | DAPC barplot                                                                            | 370        |
| 12.9.4    | DAPC scatterplot                                                                        | 375        |
| 12.9.5    | DAPC scatterplot - FLO                                                                  | 384        |
| <b>13</b> | <b>Mitogenome analyses</b>                                                              | <b>390</b> |
| 13.1      | Sequencing primers                                                                      | 390        |
| 13.2      | Preparing the mitogenome data files                                                     | 390        |
| 13.2.1    | MultiDNA format                                                                         | 390        |
| 13.2.2    | Genind format                                                                           | 390        |
| 13.2.3    | Add metadata                                                                            | 390        |
| 13.2.4    | Gtypes format                                                                           | 391        |
| 13.2.5    | Haplotype format                                                                        | 391        |
| 13.2.6    | Save data                                                                               | 392        |
| 13.2.7    | Load data                                                                               | 392        |
| 13.3      | Genetic diversity                                                                       | 394        |
| 13.3.1    | Overall diversity                                                                       | 394        |
| 13.3.2    | Diversity per location                                                                  | 401        |
| 13.3.3    | Diversity per Site                                                                      | 418        |
| 13.3.4    | Diversity per region                                                                    | 425        |
| 13.4      | Haplotype network                                                                       | 431        |
| 13.4.1    | Rarefaction                                                                             | 431        |
| 13.4.2    | Network                                                                                 | 433        |
| 13.5      | Genetic differentiation                                                                 | 462        |
| 13.5.1    | PHIst per Location                                                                      | 462        |
| 13.5.2    | PHIst per Site                                                                          | 467        |
| 13.5.3    | PHIst per region                                                                        | 469        |
| 13.6      | PCA                                                                                     | 472        |
| <b>14</b> | <b>References</b>                                                                       | <b>474</b> |
| <b>15</b> | <b>Citations for packages</b>                                                           | <b>474</b> |
| <b>16</b> | <b>Session Info</b>                                                                     | <b>476</b> |



# 1 Background

This Rmarkdown document described the data-filtering and analysis steps for assessing the population structure of the Bull Shark (*Carcharhinus leucas*) in Devloo-Delva et al. Basically, we followed a step-wise procedure to analyse the data at different hierarchies and with different subsets. Each time the data was sub-sampled, we re-filtered the data:

1. Hundred-eighty-eight sharks, with 32 technical replicates, were sequenced and genotyped according to the DArTseq protocol (see Feutry et al. 2017) to yield 250,950 single nucleotide polymorphisms (SNPs).
  - The raw DArTseq data was investigated to find putative sex-linked markers (i.e. markers located on the sex chromosomes), as these markers can assign the genetic sex and could potentially bias the population structure analyses (see Benestan et al. 2017).
  - The data was loosely filtered to identify incorrect species in our data using a simple principal component analysis.
  - The data with only confirmed Bull Sharks was used to select approximately 3400 SNPs to design targeted capture probes for DArTcap genotyping (see Feutry et al. 2020).
  - We also investigated population structure and genetic diversity within Australia, where sample sizes were largest.
2. We analysed the resulting DArTcap SNPs for 940 individuals and an additional 74 technical replicates.
  - The raw DArTcap data was again tested to identify sex-linked markers.
  - We applied a loose data quality filtering to identify incorrect species.
  - The data with only Bull Sharks was analysed for genetic diversity and population structure
3. Subsequently, we randomly subsampled 60 individuals from Australia to reduce the bias that was caused by extreme unequal sample sizes (see Puechmaille 2016; Foster et al. 2018).
4. Within the West-Atlantic population, we looked for signals of (sub)structure that could have been hidden due to the extreme differentiation from other populations.
5. Within the Indo-West Pacific (IWP) population, we looked for signals of (sub)structure that could have been hidden due to the extreme differentiation from other populations. In addition, we looked for close-kin relations within the IWP, given the large sample size.
6. Within Australia, we investigated the potential that rivers or regions form fine-scale structure.
7. Lastly, we amplified the full mitochondrial genome (mitogenome) of 361 Bull Sharks from the eastern Atlantic and Indo-Pacific regions.
  - Genetic diversity
  - Haplotype networks
  - Genetic differentiation

## 2 Sampling map and metadata

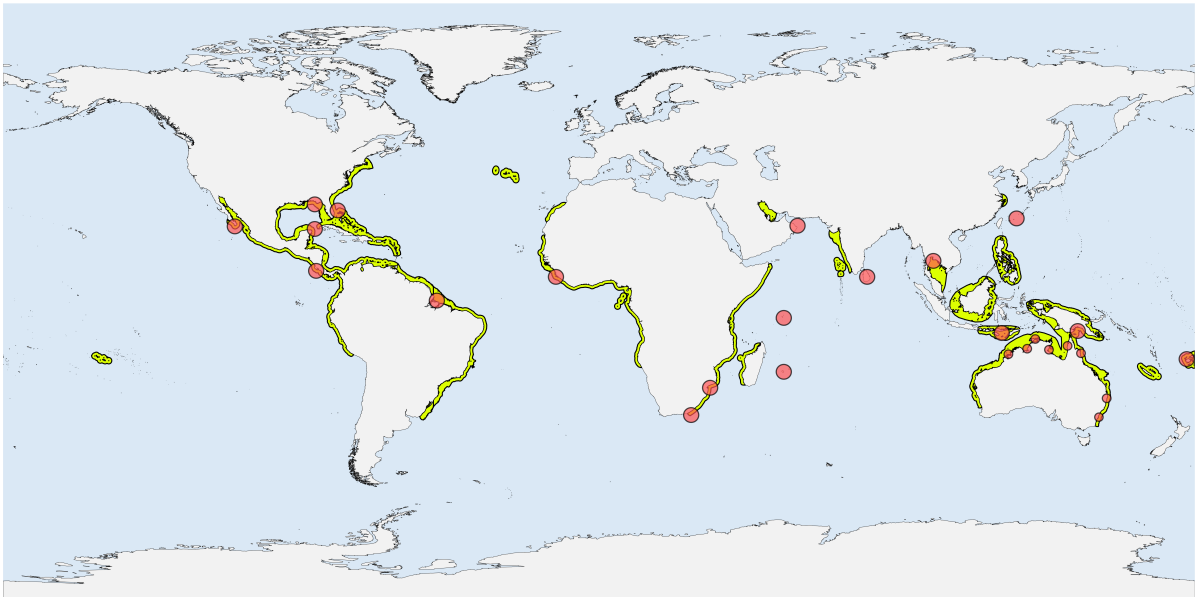

### 2.1 Visual sex ID

```
metafile <- "1.BullShark_AllSamples_metadata.csv"
meta <- readr::read_csv(metafile) %>%
  dplyr::filter(SpeciesID_genetic == "Carcharhinus leucas")
pop.levels <- c("Gulf of California", "Costa Rica", "Caribbean Sea",
               "Gulf of Mexico", "Western North Atlantic", "Brazil",
               "Sierra Leone", "South Africa", "Mozambique", "Reunion",
               "Seychelles", "Arabian Sea", "Sri Lanka", "Thailand",
               "Indonesia", "Papua New Guinea", "Australia", "Japan", "Fiji")
meta$Site <- factor(meta$Site, levels = pop.levels)
meta$Date_sampled <- as.Date(meta$Date_sampled, "%d/%m/%Y")
```

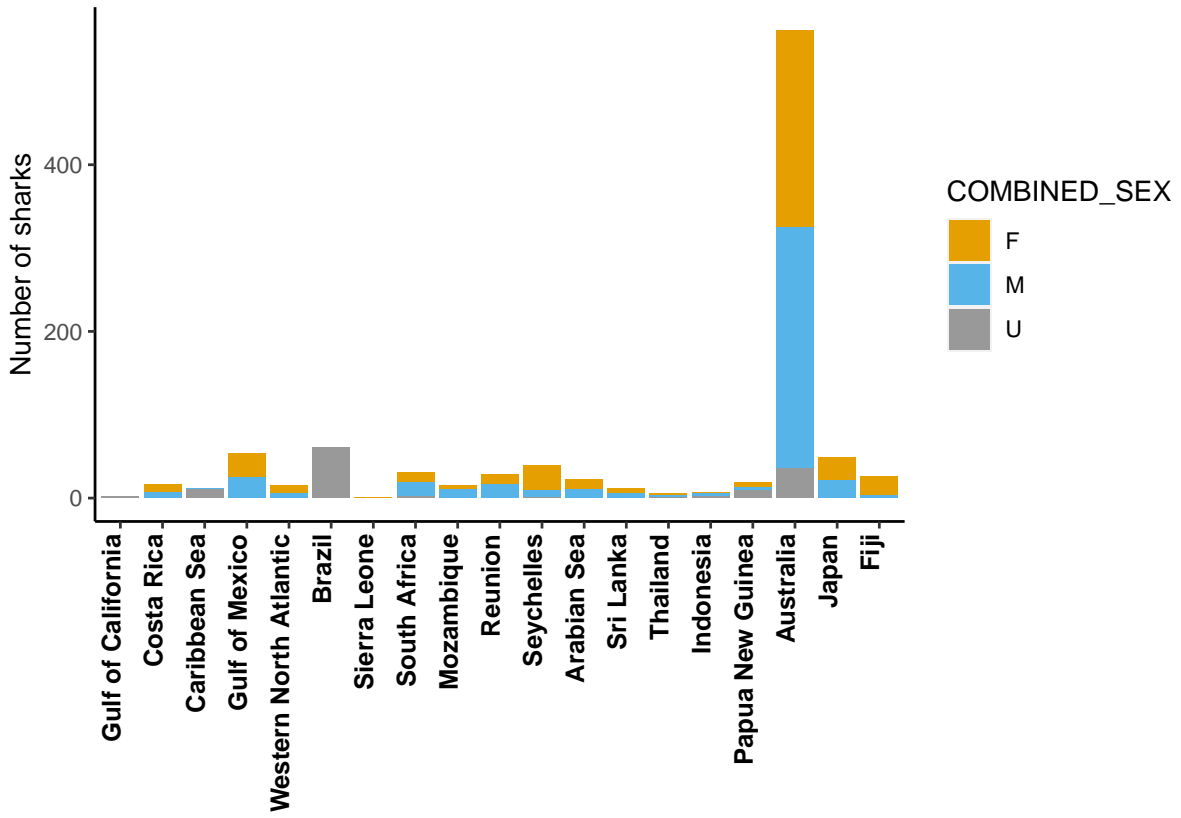

## 2.2 Total lengths

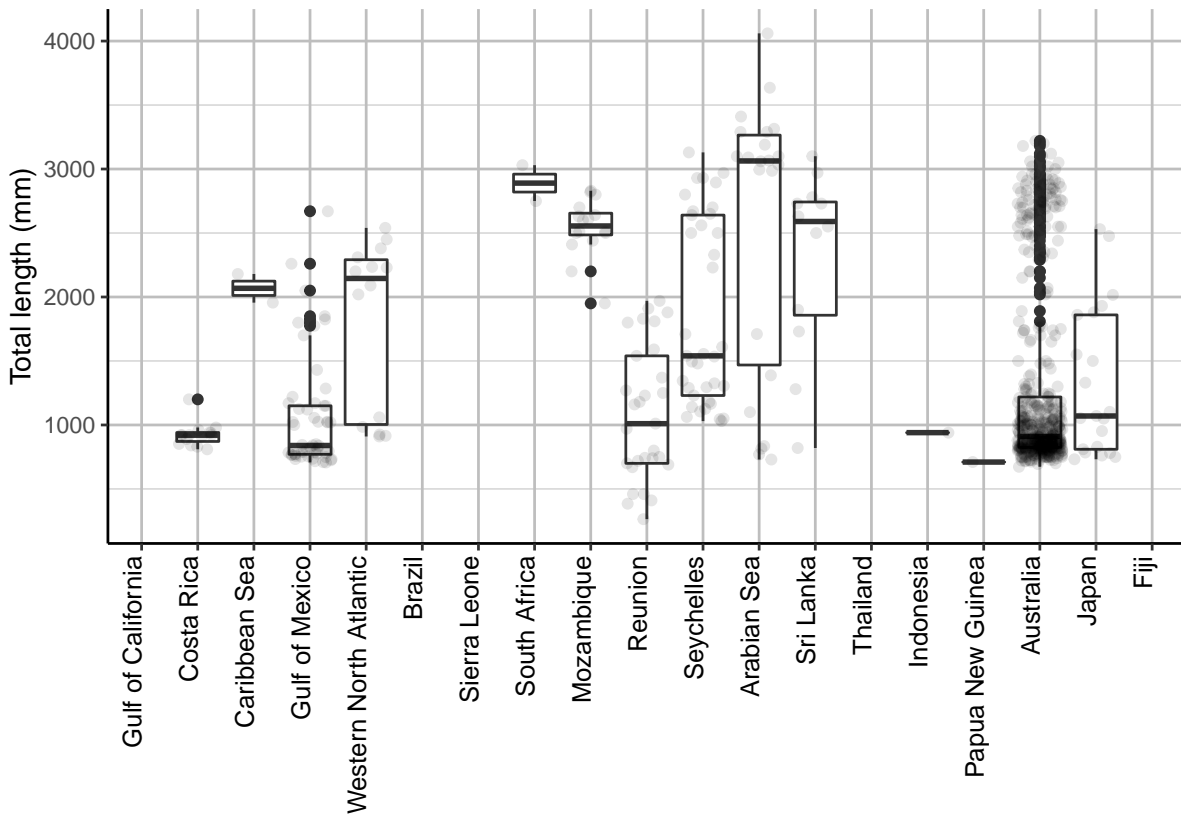

### 2.3 Aproximate Length-at-age

Based on length-at-age function from Tillet et al. (2011).

“Model-averaged growth parameters for these length-at-age data are theoretical asymptotic length ( $L_{inf}$ ) (s.e.) = 3119 (9.803)mm and a growth coefficient ( $k$ ) = 0.158 year<sup>-1</sup> respectively. Age at maturity was 9.5 years and like pig-eye sharks, bull sharks are long-lived with a predicted longevity of >27 years (Table 2). Juvenile growth rate was 186 mm/year for the first five years and then slowed to 45 mm/year post-maturity.”

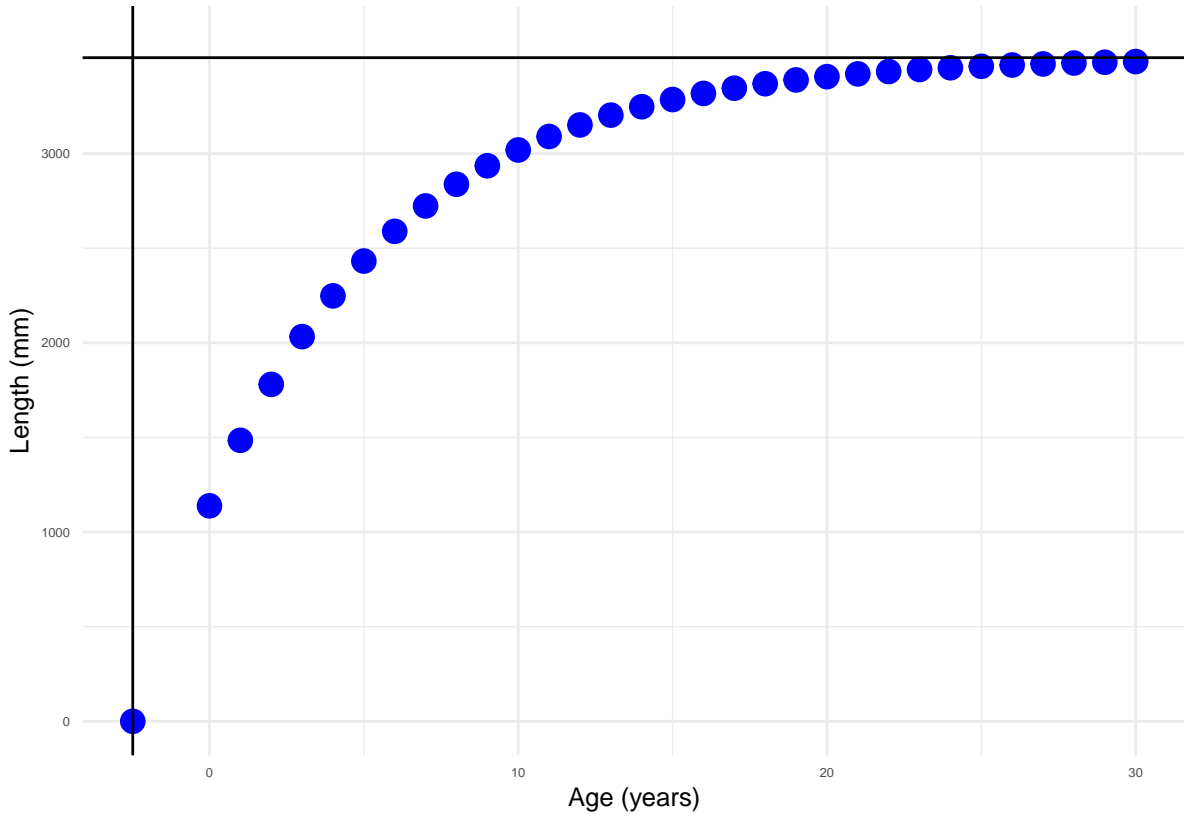

### 2.3.1 Catch date

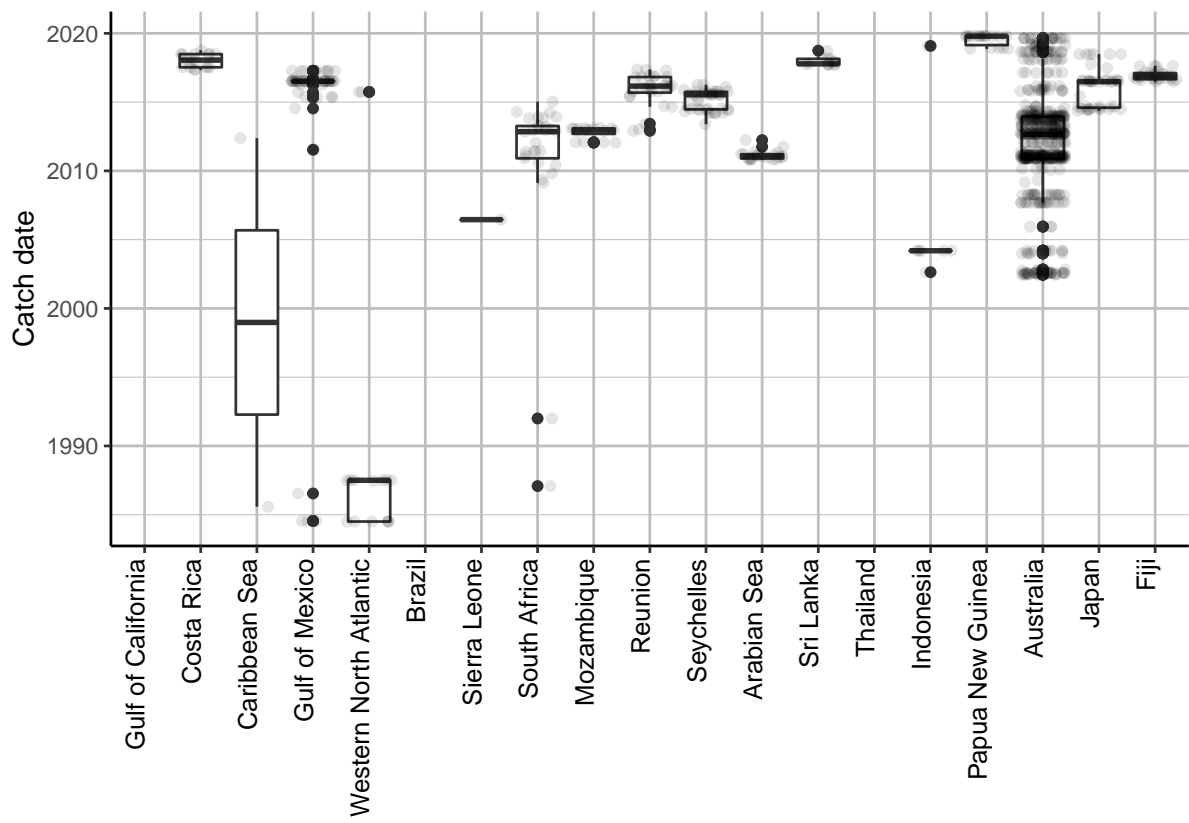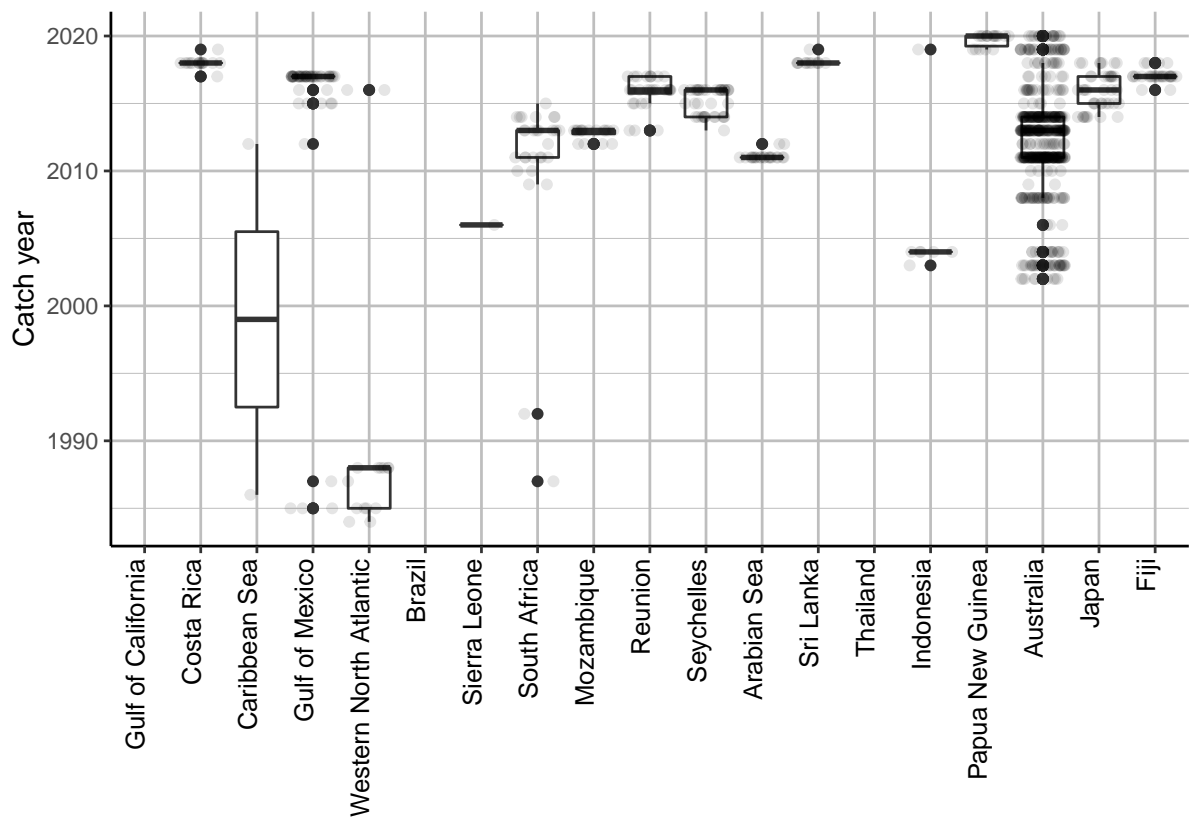

### 2.3.2 Age

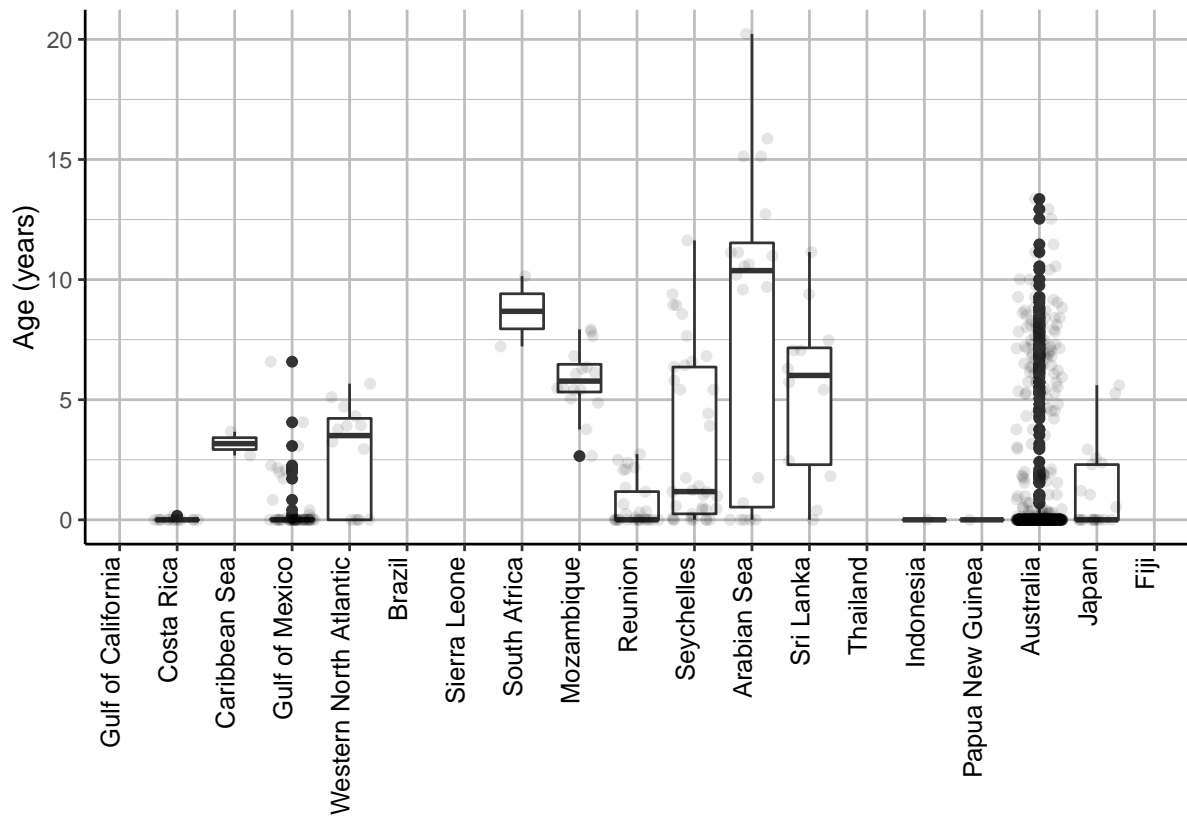

## [1] 4060

## [1] 2

### 2.3.3 Cohort

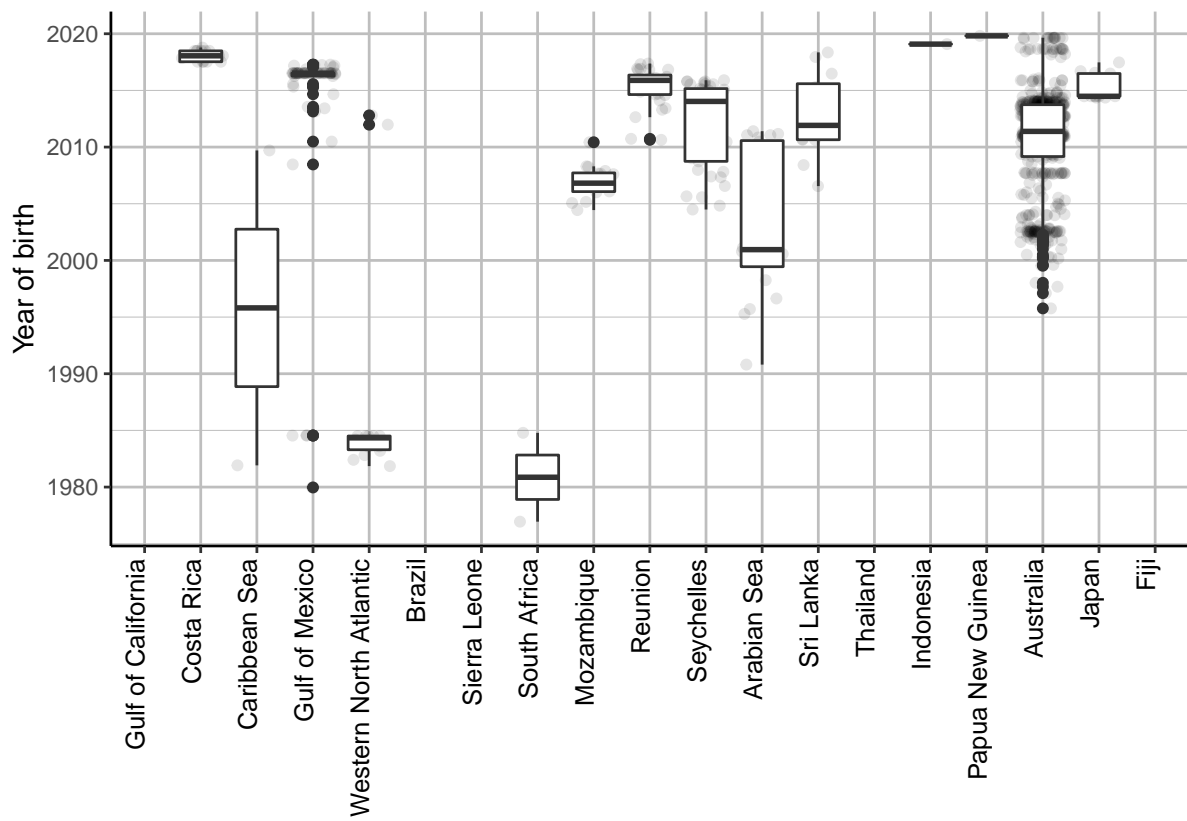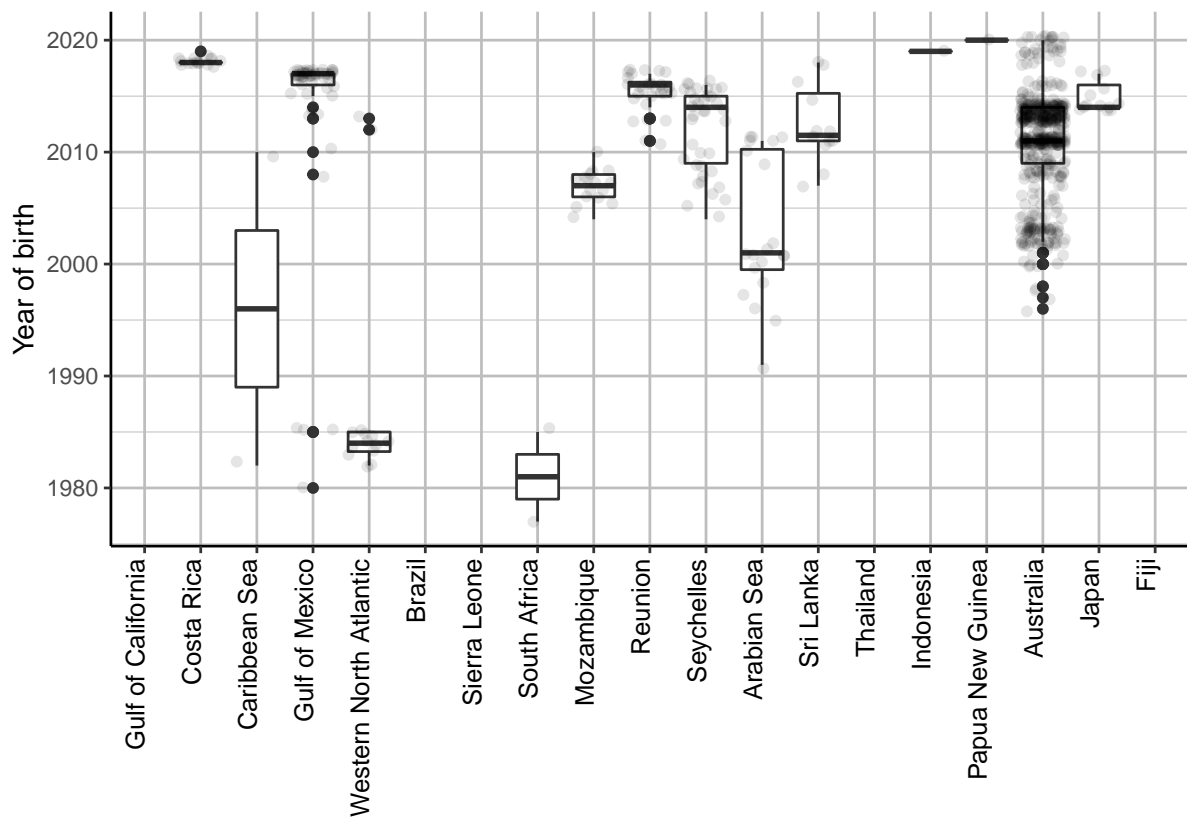

### 3 Load packages

```
library(radiator)
library(ggplot2)
library(dplyr)
library(tidyverse)
library(ade4)
library(adeigenet)
library(ape)
library(apex)
library(assigner)
library(assignPOP)
library(dartR)
library(fossil)
library(haplotypes)
library(data.table)
library(ggplot2)
library(grid)
library(gridExtra)
library(gtools)
# library(HWxtest)
library(kableExtra)
library(knitr)
library(marmap)
library(magrittr)
library(mvbutils)
library(OutFLANK)
library(pegas)
library(qvalue)
library(rubias)
library(strataG)
library(vegan)
source("Filtering funtions.R")

#set colours

colours.prior <- adegenet::funky(10)

colours.4 <- adegenet::funky(4)
names(colours.4) <- c("Brazil", "Caribbean Sea", "Gulf of Mexico",
                    "Western North Atlantic")

colours.6 <- adegenet::funky(6)
names(colours.6) <- c("E-PAC", "W-ATL", "E-ATL", "IWP", "Japan", "Fiji")

colours.8 <- adegenet::funky(8)
names(colours.8) <- c("E-PAC", "E-ATL", "W-IO", "N-IO", "E-IO", "W-PAC",
                    "Japan", "Fiji")

colours.10 <- adegenet::funky(10)
names(colours.10) <- c("South Africa", "Mozambique", "Reunion", "Seychelles",
                    "Arabian Sea", "Sri Lanka", "Thailand", "Indonesia",
                    "Papua New Guinea", "Australia")

colours.14 <- adegenet::funky(14)
names(colours.14) <- c("Gulf of California", "Costa Rica", "Sierra Leone",
                    "South Africa", "Reunion", "Seychelles", "Arabian Sea",
```



```

        "Sri Lanka","Thailand","Indonesia","Papua New Guinea",
        "Australia","Japan","Fiji")

colours.18 <- adegenet::funky(18)
names(colours.18) <- c("Costa Rica","Brazil", "Caribbean Sea", "Gulf of Mexico",
        "Western North Atlantic", "Sierra Leone", "South Africa",
        "Mozambique", "Reunion","Seychelles","Arabian Sea",
        "Sri Lanka","Thailand","Indonesia","Papua New Guinea",
        "Australia","Japan","Fiji")

colours.13 <- adegenet::funky(13)
names(colours.13) <- c("Fitzroy River","Victoria River","Daly River","Adelaide River",
        "South Alligator River","East Alligator River","Blue mud Bay",
        "Roper River","Town's River", "Wenlock River","Trinity inlet",
        "Clarence River","Sydney Harbour")

colours.26 <- adegenet::funky(26)
names(colours.26) <- c("South Africa", "Mozambique", "Reunion" , "Seychelles",
        "Arabian Sea", "Sri Lanka", "Thailand", "Indonesia",
        "Papua New Guinea" , "Fitzroy River", "Daly River",
        "Adelaide River","Darwin Coastal", "South Alligator River",
        "East Alligator River","Blue mud Bay", "Roper River",
        "Town's River","Unknown","Wenlock River","Trinity inlet",
        "Clarence River", "Sydney Harbour","Okinawa", "Urauchi River",
        "Fiji")

colours.27 <- adegenet::funky(27)
names(colours.27) <- c("Gulf of California","Costa Rica", "Sierra Leone",
        "South Africa","Reunion","Seychelles","Arabian Sea",
        "Sri Lanka","Thailand","Indonesia","Papua New Guinea",
        "Fitzroy River", "Victoria River","Daly River",
        "Adelaide River","South Alligator River", "East Alligator River",
        "Blue mud Bay", "Roper River","Town's River",
        "Wenlock River","Trinity inlet","Clarence River",
        "Sydney Harbour","Okinawa", "Urauchi River", "Fiji")

colours.29 <- adegenet::funky(29)
names(colours.29) <- c("Brazil","Caribbean Sea","Gulf of Mexico",
        "Western North Atlantic", "Sierra Leone", "South Africa",
        "Mozambique", "Reunion" , "Seychelles", "Arabian Sea",
        "Sri Lanka", "Thailand", "Indonesia", "Papua New Guinea" ,
        "Fitzroy River", "Daly River", "Adelaide River",
        "South Alligator River", "East Alligator River","Blue mud Bay",
        "Roper River","Town's River","Wenlock River","Trinity inlet",
        "Clarence River", "Sydney Harbour","Okinawa", "Urauchi River",
        "Fiji")

colours.32 <- adegenet::funky(32)
names(colours.32) <- c("Costa Rica" , "Brazil", "Caribbean Sea","Gulf of Mexico",
        "Western North Atlantic", "Sierra Leone", "South Africa",
        "Mozambique", "Reunion" , "Seychelles", "Arabian Sea",
        "Sri Lanka", "Thailand", "Indonesia", "Papua New Guinea" ,
        "Fitzroy River", "Daly River", "Adelaide River","Darwin Coastal",
        "South Alligator River", "East Alligator River","Blue mud Bay",
        "Roper River","Town's River","Unknown","Wenlock River",
        "Trinity inlet","Clarence River", "Sydney Harbour", "Okinawa",
        "Urauchi River", "Fiji")

```

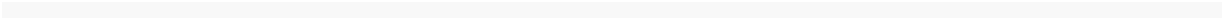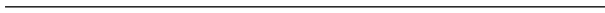

## 4 DArTseq - All data

We sequenced 188 putative Bull Shark samples with the DArTseq protocol (according to Feutry et al. 2017). Thirty-two sample replicates were included to test the reproducibility of the genotyping.

These DArTseq samples were used to identify sex-linked markers, species and population structure, and subsequently select ~35000 markers for capture probe design.

### 4.1 Set strata

One sample failed library construction

```
data.file.snp <- "DArTseq_SNP_OrderAppendix_2_DCarcha19-4454.csv"
targetid <- readr::read_tsv("DArTseq_target.id.tsv")

strata <- readr::read_csv(metafile) %>%
  dplyr::left_join(targetid, by = "INDIVIDUALS") %>%
  dplyr::filter(!is.na(TARGET_ID)) %>%
  dplyr::mutate(STRATA = Site2)
strata$INDIVIDUALS <- with(strata, make.unique(as.character(INDIVIDUALS)))
# readr::write_tsv(strata, path = "Bull_shark_DArTseq_strata.tsv")
```

### 4.2 Find sex-linked markers

Sex markers are identified as per Devloo-Delva et al. (2022 preprint).

```
data <- "DArTseq_SNP_OrderAppendix_2_DCarcha19-4454.csv"
silicodata <- "DArTseq_SILICO_OrderAppendix_1_DCarcha19-4454.csv"
strata <- radiator::read_strata("Bull_shark_DArTseq_strata.tsv",
                              keep.two = FALSE)$strata
strata %<>% dplyr::rename(POP = "STRATA") %>%
  dplyr::rename(STRATA = "Sex")

bull_shark <- radiator::sexy_markers(
  data = data,
  silicodata = silicodata,
  strata = strata,
  interactive.filter = TRUE)
save(bull_shark, file = "Sex_results.Rdata")
```

### Individual's QC stats

Missing genotypes outlier: 0.1887515  
n. het markers in the bp range = 16718  
n. het markers in the bp IQR = 616

#### Correlations:

total coverage & missing = 0.01  
total coverage & mean coverage = 0.65  
total coverage & heterozygosity = 0.06  
missing & heterozygosity = 0.03

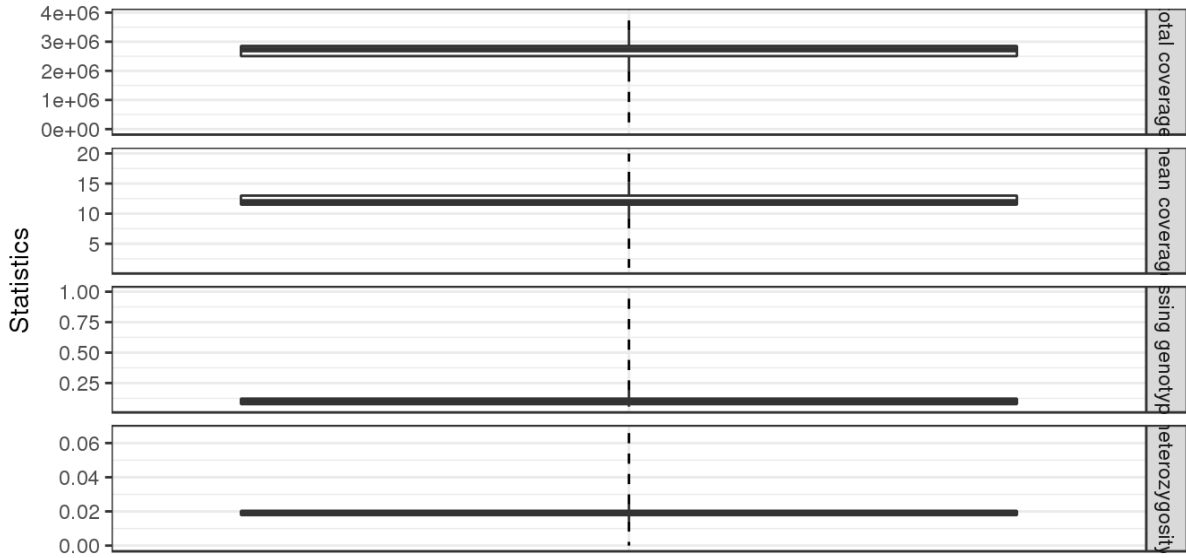

### Absence of each SNP marker between females and males

Global: Sex is visually assigned

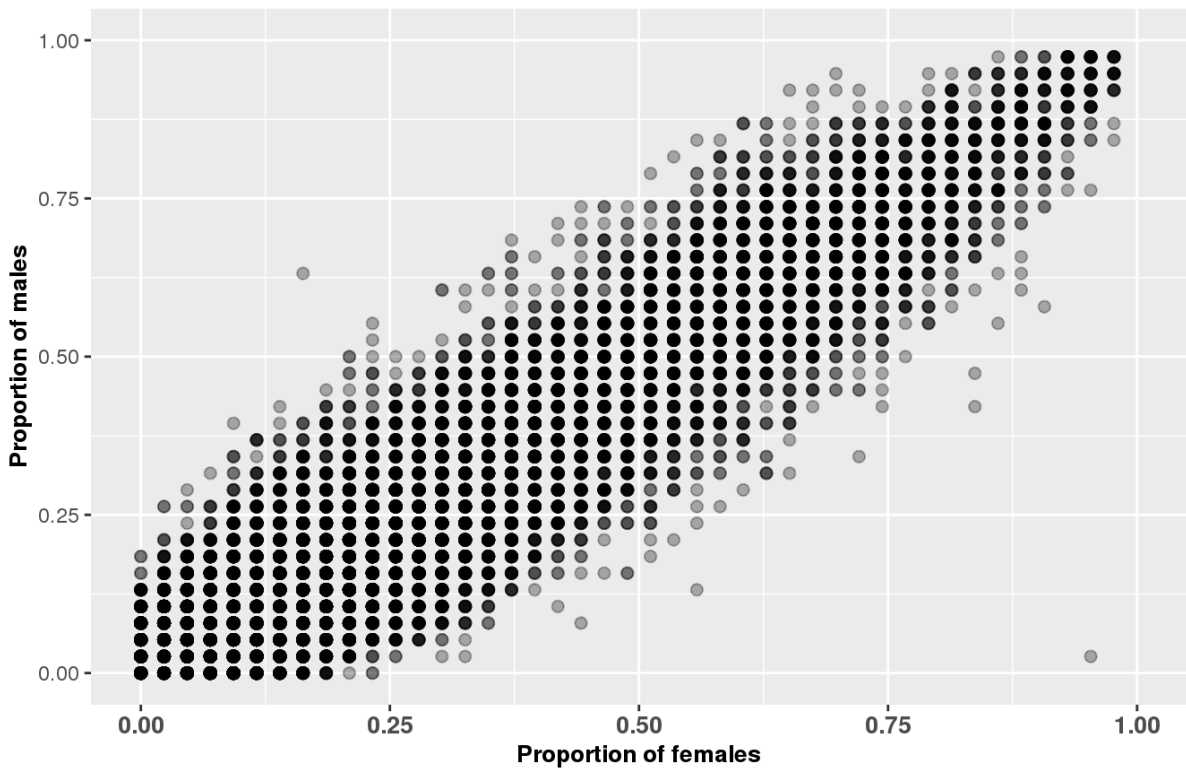

### Tukey mean-difference plot of each SNP marker between females and males

Global: Sex is visually assigned

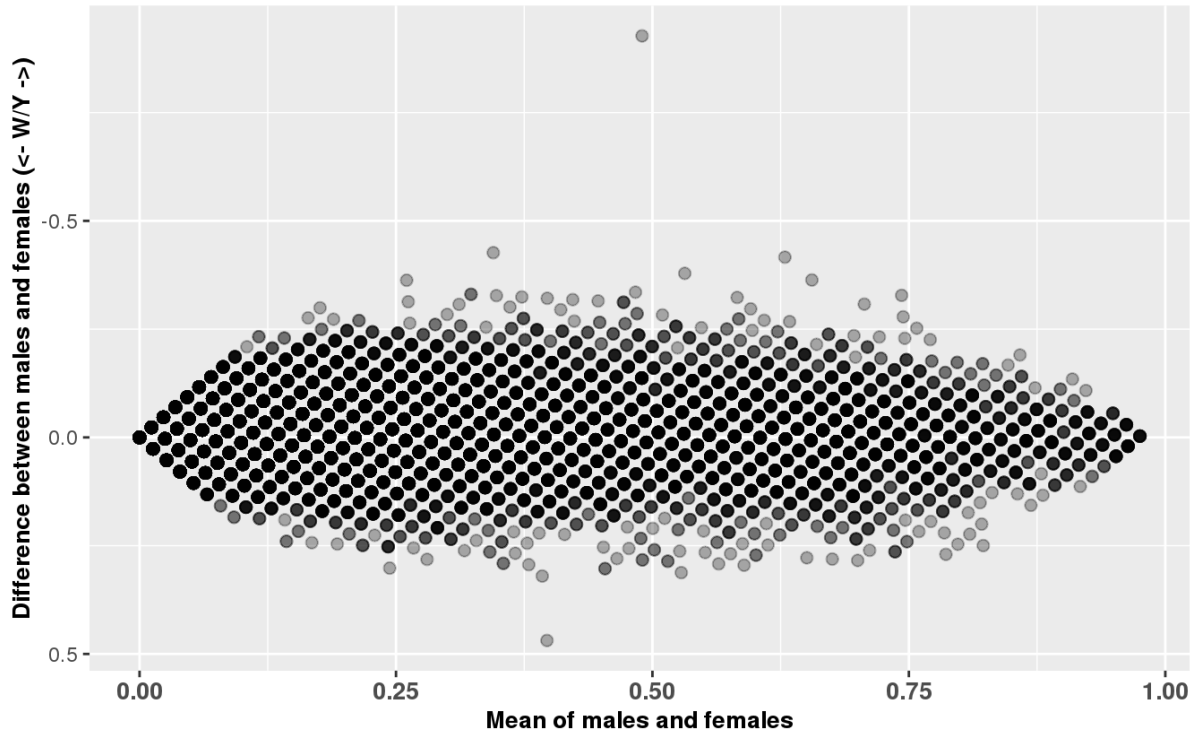

### Absence of each SILICO marker between females and males

Global: Sex is visually assigned

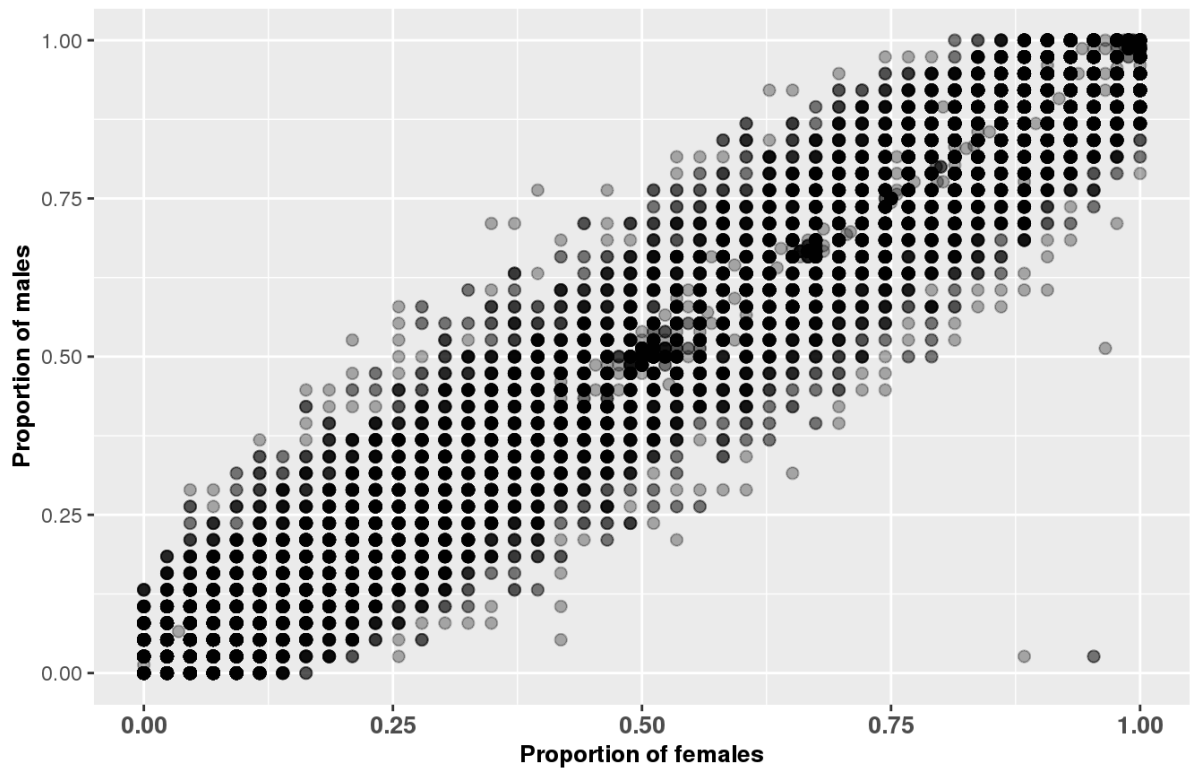

### Tukey mean-difference plot of each SILICO marker between females and males

Global: Sex is visually assigned

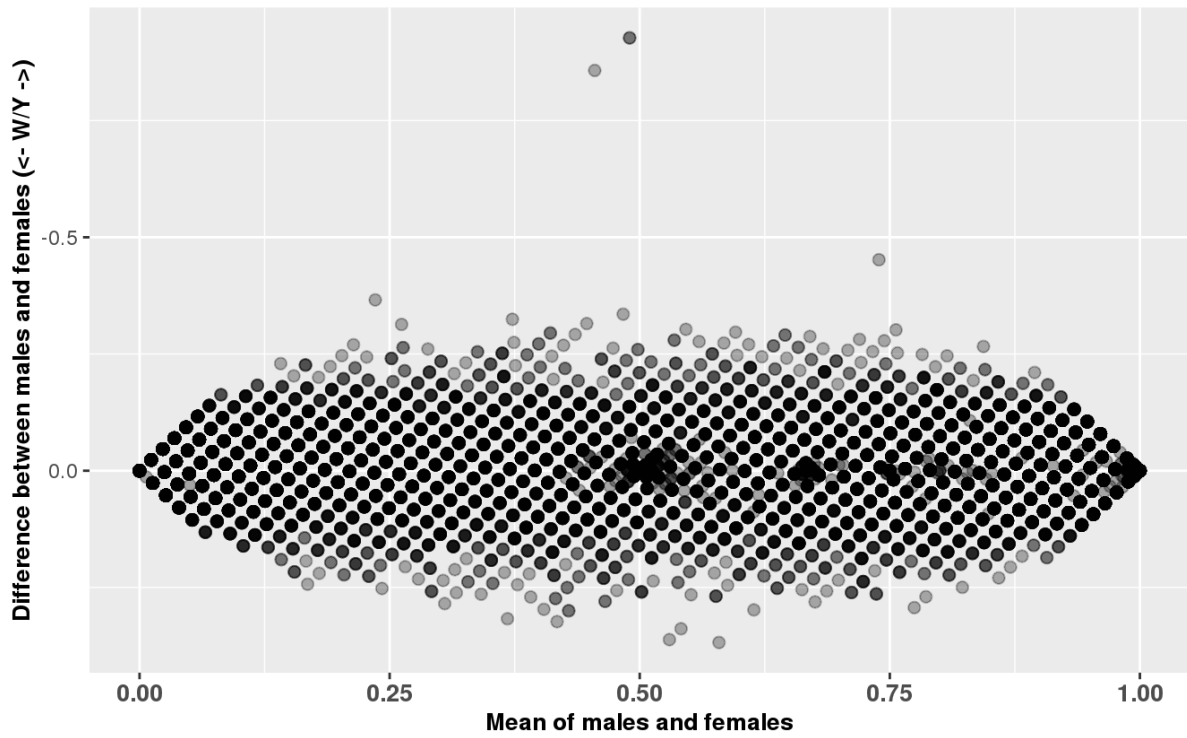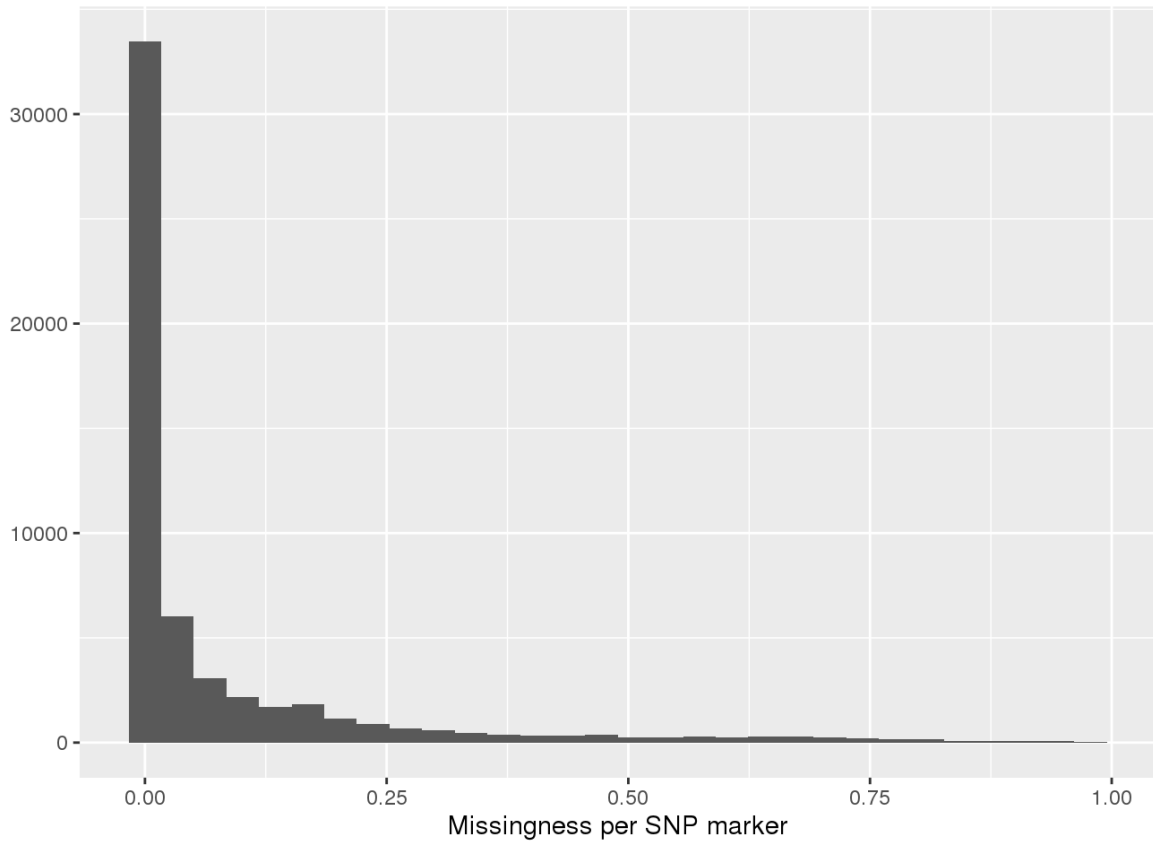

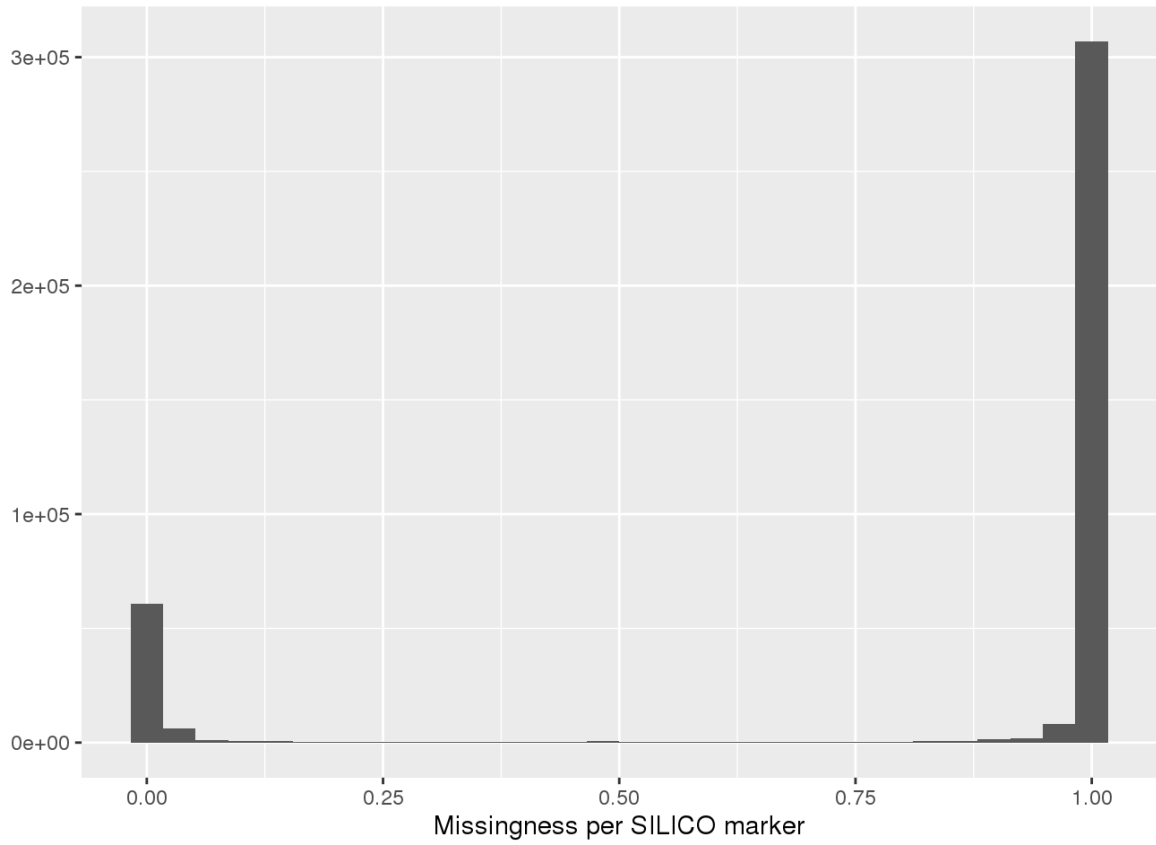

### Heterozygosity of each SNP marker between females and males

Global: Sex is genetically (SILICO) assigned

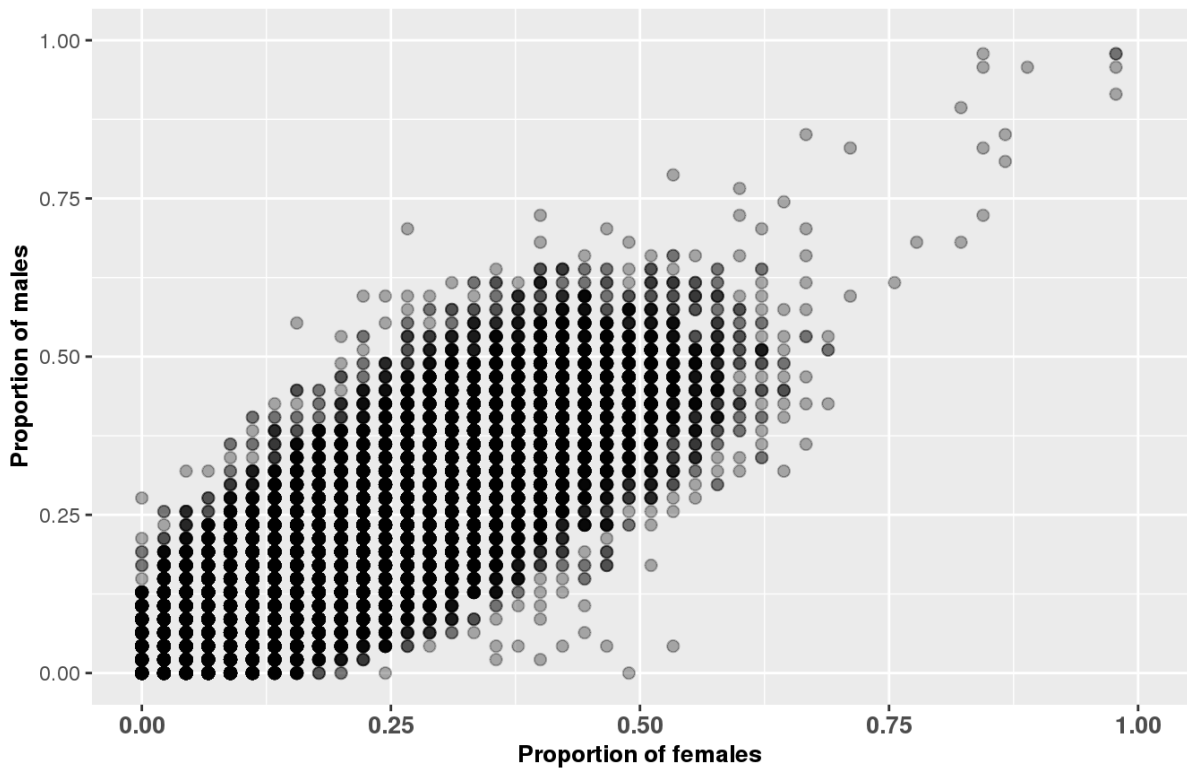

### Quantile residual plot of each SNP marker between females and males

Global: Sex is genetically (SILICO) assigned; tau = 0.03

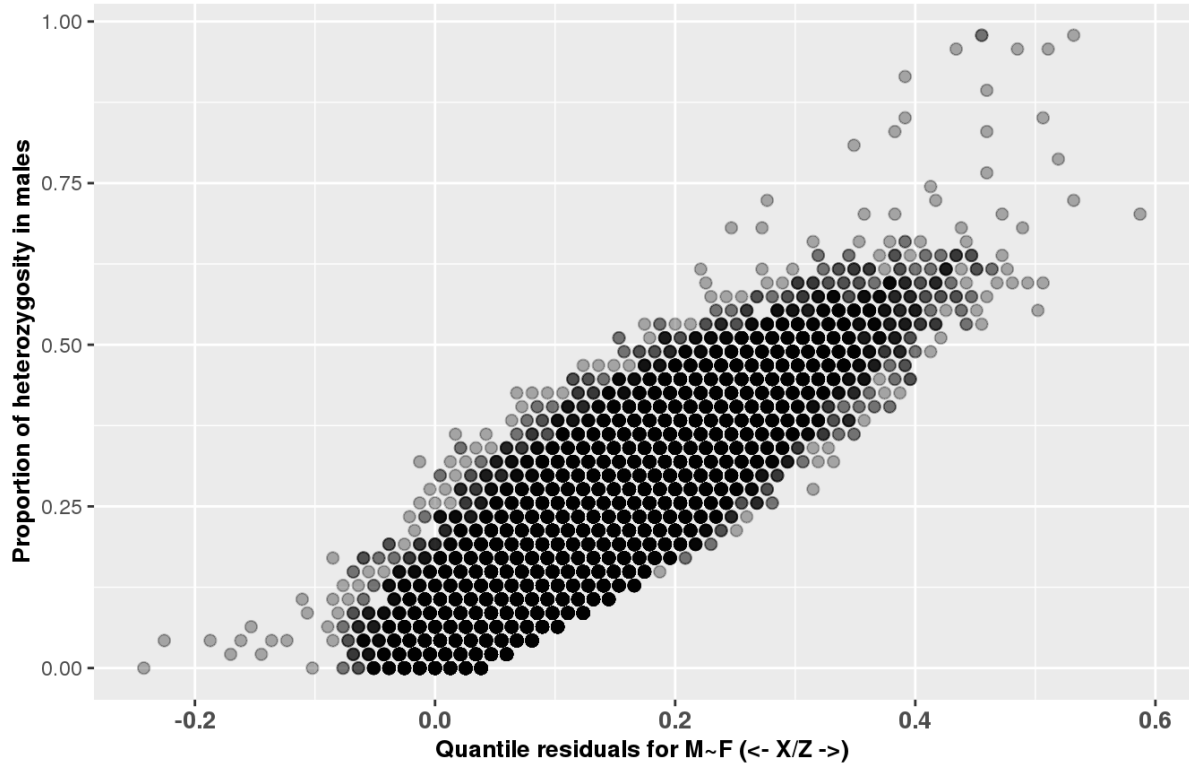

### Average coverage of each marker between females and males

Global: Sex is genetically (SILICO) assigned

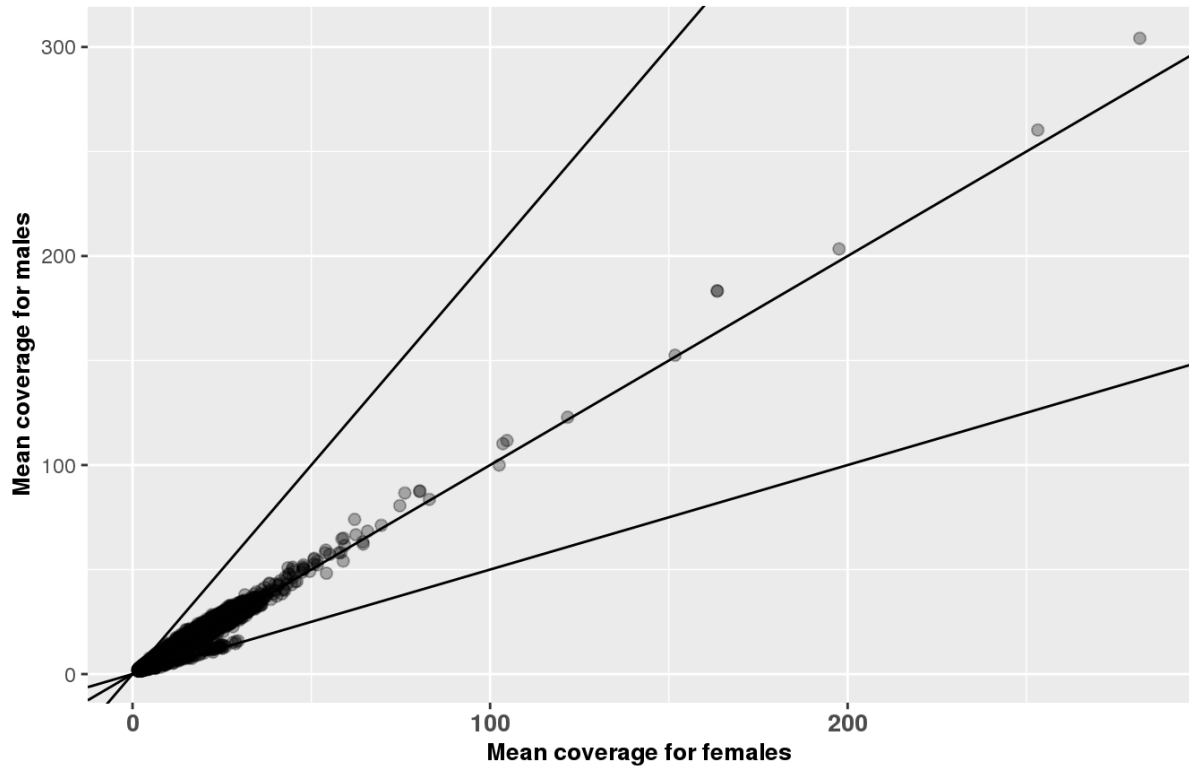



### Histogram of females over males coverage for each marker

Global: Sex is genetically (SILICO) assigned

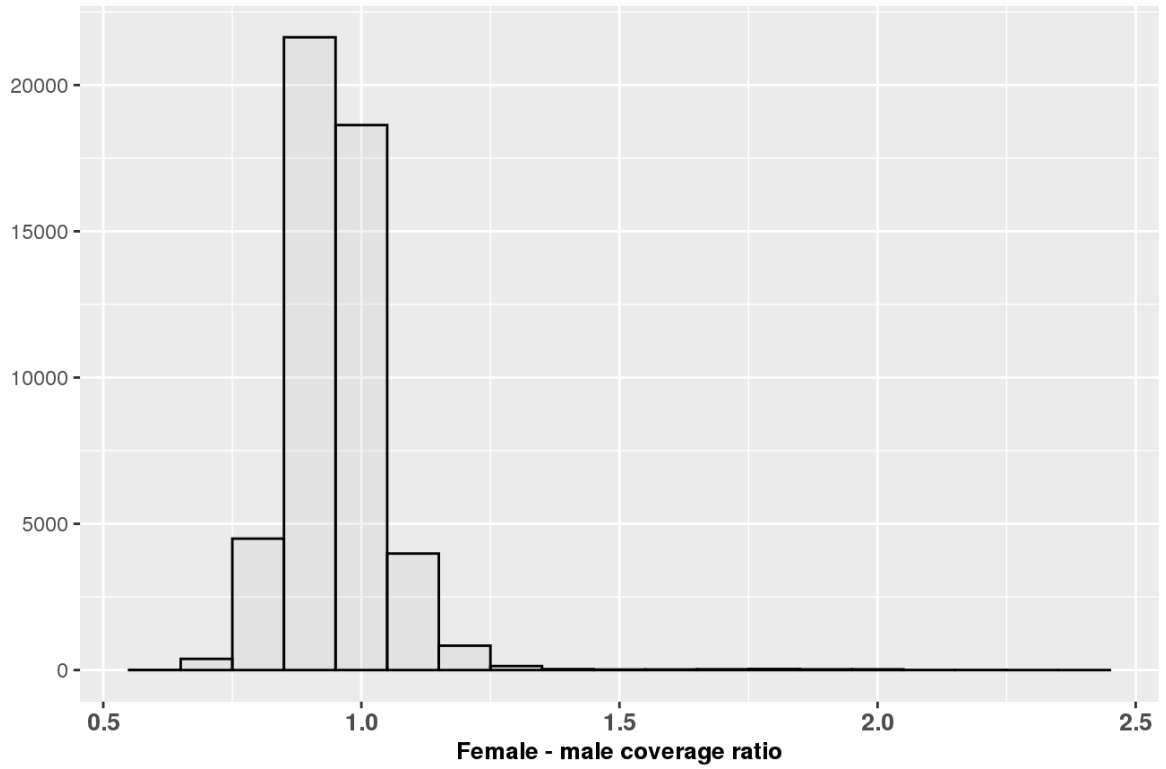

### Histogram of females counts over males counts for each marker

Global: Sex is genetically (SILICO) assigned

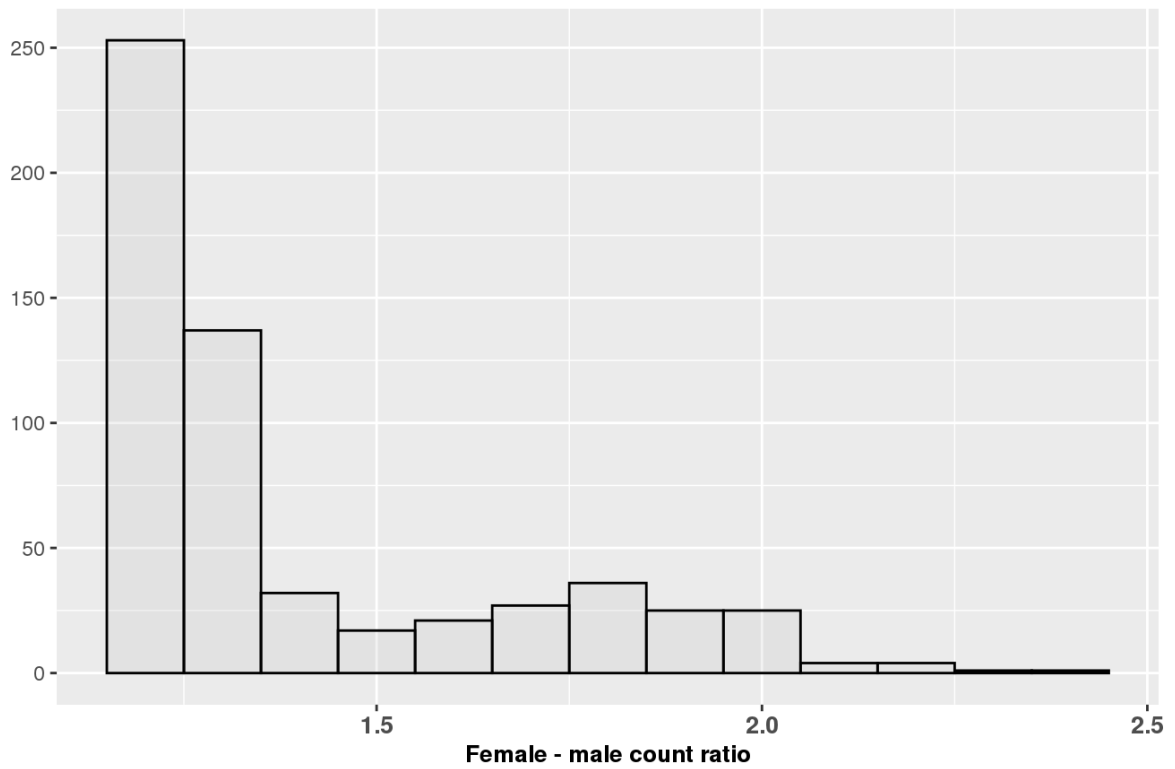

### Average coverage of each silico marker between females and males

Global: Sex is genetically (SILICO) assigned

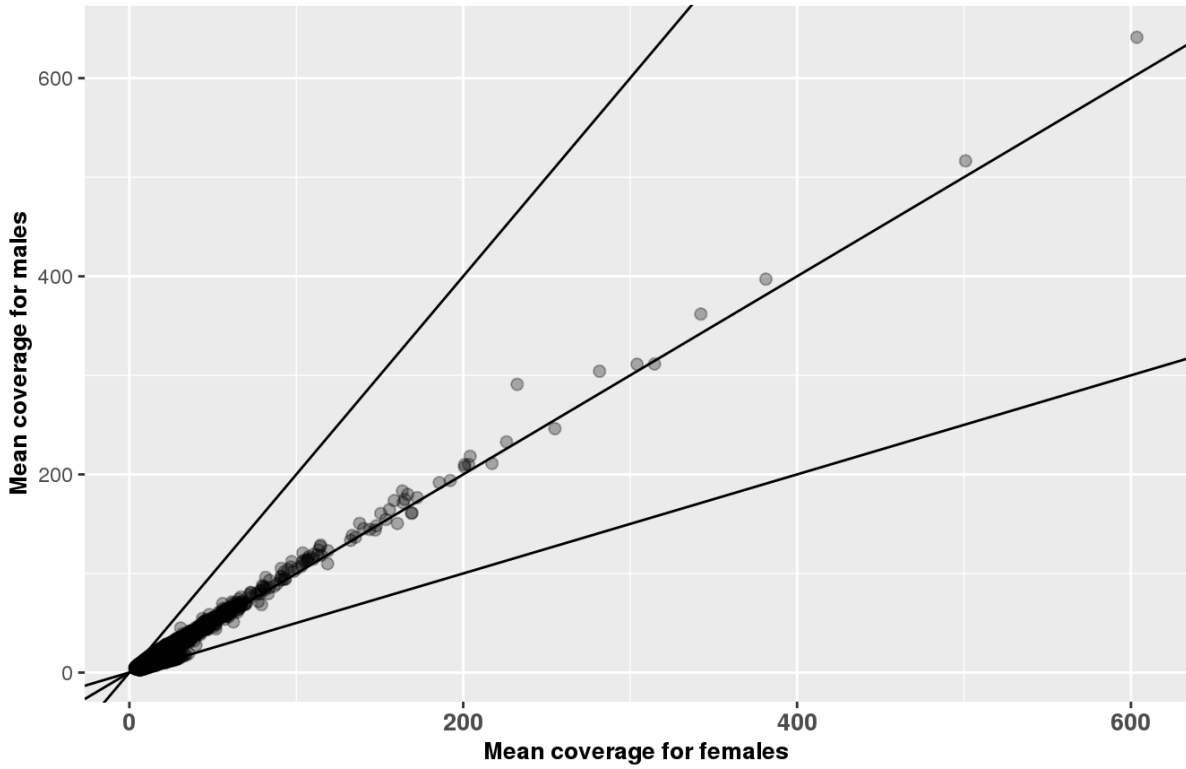

### Histogram of females coverage over males coverage for each SILICO

Global: Sex is genetically (SILICO) assigned

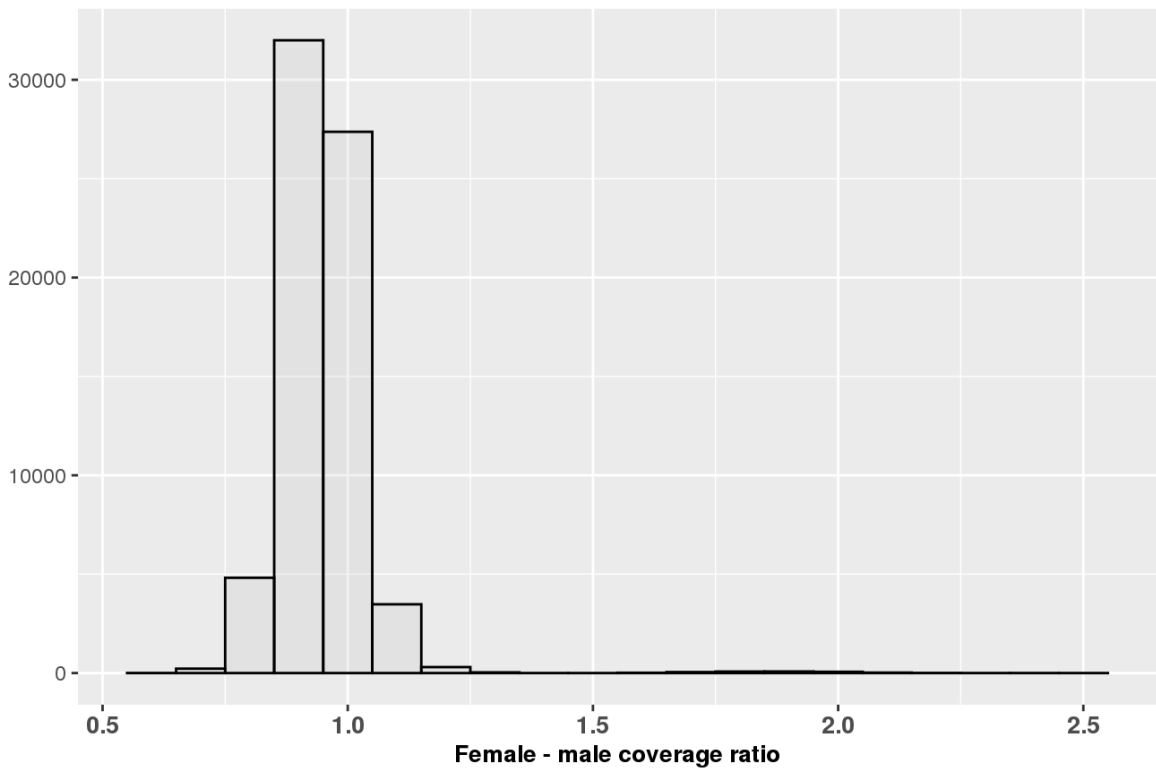

### Histogram of females coverage over males coverage for each SILICO

Global: Sex is genetically (SILICO) assigned

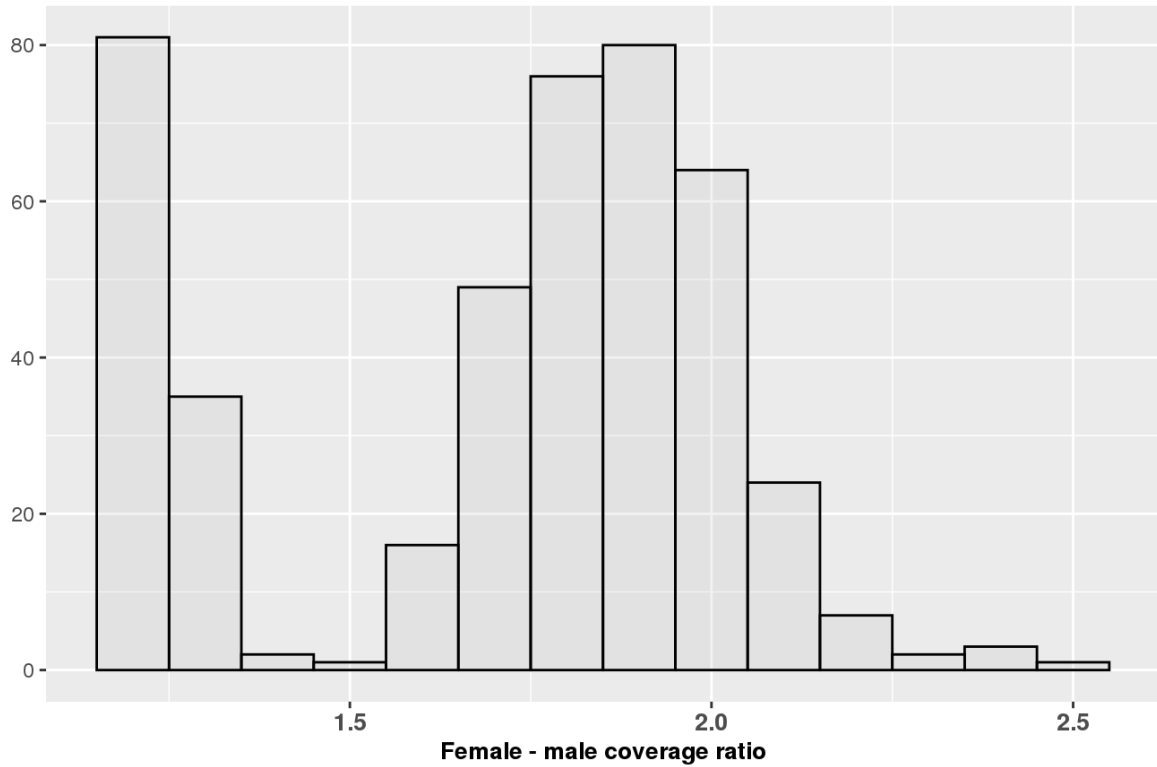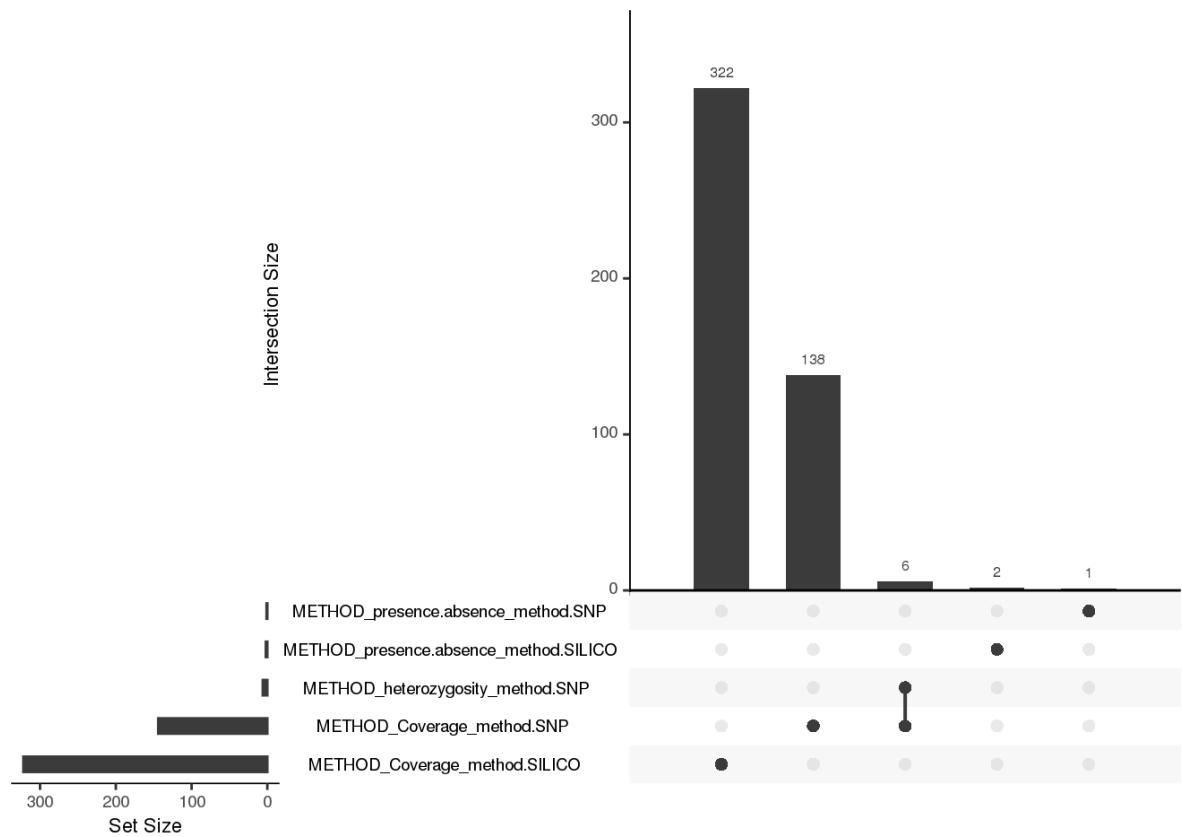

### 4.3 Filter data

First we filter all data with a soft filter (SF) to allow for species identification.

1. Marker Reproducibility: 0.98
2. Individual missingness: n
3. Individual Het - low: n
4. Individual Het - high: n
5. Individual total coverage - low: 7,000
6. Individual total coverage - high: 10,000,000
7. Marker MAC - low: 14
8. Marker coverage - low: 5
9. Marker coverage - high:39
10. Marker maximum missing proportion: 0.1
11. Marker snp position on locus: n
12. Max 3 SNPs per locus
13. 1 SNP per locus according to mac
14. no LD filter
15. Individual Het - low: n
16. Individual Het - high: n
17. Duplicated individuals: n
18. no filter on HWE

```
dartseq.data <- "DARtseq_SNP_OrderAppendix_2_DCarcha19-4454.csv"
strata <- "Bull_shark_DARtseq_strata.tsv"
BSsnp <- radiator::filter_rad(dartseq.data, strata,
                             parallel.core = 1)
BS.dartseq.SF.gds <- BSsnp$gds
BS.dartseq.SF.tidy <- BSsnp$output$tidy.data
print(BS.dartseq.SF.gds, expand=TRUE, all=TRUE, attribute=TRUE,
      attribute.trim=FALSE)
save(BS.dartseq.SF.tidy, file = "DARtseq_ALL_SF_objects.Rdata")
```

Table 1:

| FILTERS                                    | VALUES     | BEFORE                         | BLACKLIST                  |
|--------------------------------------------|------------|--------------------------------|----------------------------|
| Filter DARt reproducibility                | 0.98       | 219 / 18 / 1 / 168810 / 250945 | 0 / 0 / 0 / 9754 / 19242   |
| Filter monomorphic markers                 | NA         | 219 / 18 / 1 / 159056 / 231703 | 0 / 0 / 0 / 0 / 0          |
| Filter markers in common                   | NA         | 219 / 18 / 1 / 159056 / 231703 | 0 / 0 / 0 / 70113 / 110685 |
| Filter individuals based on total coverage | 7000 1e+07 | 219 / 18 / 1 / 88943 / 121018  | 1 / 0 / 0 / 0 / 0          |
| Filter monomorphic markers                 | NA         | 218 / 18 / 1 / 88943 / 121018  | 0 / 0 / 0 / 5 / 11         |
| Filter MAC                                 | 14         | 218 / 18 / 1 / 88938 / 121007  | 0 / 0 / 0 / 34884 / 61921  |
| Filter coverage min / max                  | 5-39       | 218 / 18 / 1 / 54054 / 59086   | 0 / 0 / 0 / 14506 / 14976  |
| Filter genotyping                          | 0.1        | 218 / 18 / 1 / 39548 / 44110   | 0 / 0 / 0 / 11105 / 13720  |
| Filter SNPs position on the read           | all        | 218 / 18 / 1 / 28443 / 30390   | 0 / 0 / 0 / 0 / 0          |
| Filter markers snp number                  | 3          | 218 / 18 / 1 / 28443 / 30390   | 0 / 0 / 0 / 25 / 123       |
| Filter short id                            | mac        | 218 / 18 / 1 / 28418 / 30267   | 0 / 0 / 0 / 0 / 1849       |
| detect mixed genomes                       | 0 1        | 218 / 18 / 1 / 28418 / 28418   | 0 / 0 / 0 / 0 / 0          |
| detect duplicate genomes                   | 0          | 218 / 18 / 1 / 28418 / 28418   | 0 / 0 / 0 / 0 / 0          |
| Filter HWE                                 | NA         | 218 / 18 / 1 / 28418 / 28418   | 0 / 0 / 0 / 0 / 0          |

#### 4.4 Save data

```
BSconvert <- radiator::genomic_converter(BS.dartseq.SF.gds,output = "genlight")
BS.dartseq.SF.gl <- BSconvert$genlight

markers.meta <- radiator::extract_markers_metadata(BS.dartseq.SF.gds, whitelist = TRUE)
individuals.meta <- radiator::extract_individuals_metadata(BS.dartseq.SF.gds, whitelist = TRUE)
BS.dartseq.SF.gl$other$ind.metrics <- individuals.meta
BS.dartseq.SF.gl$other$loc.metrics <- markers.meta

pop.levels <- c("Costa Rica", "Brazil","Caribbean Sea","Gulf of Mexico",
               "Western North Atlantic", "Sierra Leone", "South Africa",
               "Mozambique", "Reunion", "Seychelles", "Arabian Sea",
               "Sri Lanka", "Thailand", "Indonesia", "Papua New Guinea",
               "King Sound","Fitzroy River", "Durack River", "Daly River",
```

```

"Adelaide River", "South Alligator River", "East Alligator River",
"Blue mud Bay", "Roper River", "Towns River", "Skardon River",
"Wenlock River", "Trinity inlet", "Clarence River", "Sydney Harbour",
"Japan", "Fiji")
BS.dartseq.SF.gl$pop <- factor(BS.dartseq.SF.gl$other$ind.metrics$pop,
                             levels = pop.levels)

save(BS.dartseq.SF.tidy, BS.dartseq.SF.gl, file = "DARtseq_ALL_SF_objects.Rdata")

```

## 4.5 Load data

```

load("DARtseq_ALL_SF_objects.Rdata")
pop.levels <- c("Costa Rica", "Brazil", "Caribbean Sea", "Gulf of Mexico",
               "Western North Atlantic", "Sierra Leone", "South Africa",
               "Mozambique", "Reunion", "Seychelles", "Arabian Sea", "Sri Lanka",
               "Thailand", "Indonesia", "Papua New Guinea", "Australia",
               "Japan", "Fiji")
BS.dartseq.SF.gl$pop <- factor(BS.dartseq.SF.gl$other$ind.metrics$Site)
BS.dartseq.SF.gl <- BS.dartseq.SF.gl[order(BS.dartseq.SF.gl$pop,
                                           BS.dartseq.SF.gl$ind.names)]

adegenet::nInd(BS.dartseq.SF.gl) # 218
adegenet::nLoc(BS.dartseq.SF.gl) # 28418
summary(BS.dartseq.SF.gl$pop)
sum(duplicated(stringr::str_match(pattern = "-\\s*(.*?)\\s*-",
                                 string = BS.dartseq.SF.gl$ind.names)[,2])) # 32 replicate left

```

```

## [1] 218
## [1] 28418
##           Arabian Sea           Australia           Brazil
##                13                62                13
##           Caribbean Sea           Costa Rica           Fiji
##                2                10                11
##           Gulf of Mexico           Indonesia           Japan
##                13                6                14
##           Mozambique           Papua New Guinea           Reunion
##                9                6                11
##           Seychelles           Sierra Leone           South Africa
##                10                2                10
##           Sri Lanka           Thailand Western North Atlantic
##                10                8                8
## [1] 32

```

## 4.6 Remove sex-linked markers

```

load("Sex_results.Rdata")
sum(BS.dartseq.SF.gl$loc.names %in% bull_shark$sexy.summary$CLONE_ID ) #84
sex.markers <- bull_shark$sexy.summary$CLONE_ID

locnames <- BS.dartseq.SF.gl$loc.names
BS.dartseq.SF.gl <- BS.dartseq.SF.gl[!locnames %in% sex.markers]
BS.dartseq.SF.gl$other$loc.metrics <- BS.dartseq.SF.gl$other$loc.metrics[!locnames %in%
                                                                           sex.markers,]

sum(sex.markers %in% unique(BS.dartseq.SF.tidy$LOCUS)) # 84
BS.dartseq.SF.tidy <- BS.dartseq.SF.tidy[!BS.dartseq.SF.tidy$LOCUS %in%
                                         sex.markers,]

```

```
## [1] 84
## [1] 112
```

## 4.7 PCA to identify species

```
pca1 <- adegenet::glPca(BS.dartseq.SF.gl, nf = 4, parallel = TRUE,
                       n.cores = parallel::detectCores() - 1)
save(pca1, file = "DArTseq_SF_speciesID_PCA.Rdata")

load("DArTseq_SF_speciesID_PCA.Rdata")

BS.pca.scores <- as.data.frame(pca1$scores)
BS.pca.scores$pop <- adegenet::pop(BS.dartseq.SF.gl)
BS.pca.scores$species <- BS.dartseq.SF.gl$other$ind.metrics$SpeciesID_genetic
cols <- adegenet::funky(adegenet::nPop(BS.dartseq.SF.gl))

p <- ggplot2::ggplot(BS.pca.scores, ggplot2::aes(x = PC1, y = PC2, colour = pop,
                                                group = species)) +
  ggplot2::geom_point(aes(shape = species), size = 2) +
  ggplot2::scale_color_manual(values = cols) +
  ggplot2::scale_shape_manual(values = c(1,2,3,4,5,6,8,9)) +
  ggplot2::geom_hline(yintercept = 0) +
  ggplot2::geom_vline(xintercept = 0) +
  ggplot2::theme(panel.background = ggplot2::element_rect(fill = "white",
                                                         colour = "white"),
                panel.grid.major = ggplot2::element_line(size = 0.5,
                                                         linetype = 'solid',
                                                         colour = "grey"),
                panel.grid.minor = ggplot2::element_line(size = 0.1,
                                                         linetype = 'solid',
                                                         colour = "grey"),
                legend.text = ggplot2::element_text(size = 7),
                legend.position = "right",
                panel.border = element_rect(colour = "black",
                                           fill = NA, size = 1.5)) +
  ggplot2::guides(shape = ggplot2::guide_legend(ncol = 1),
                 col = ggplot2::guide_legend(ncol = 2),
                 override.aes = list(size = 0.5))

p
```

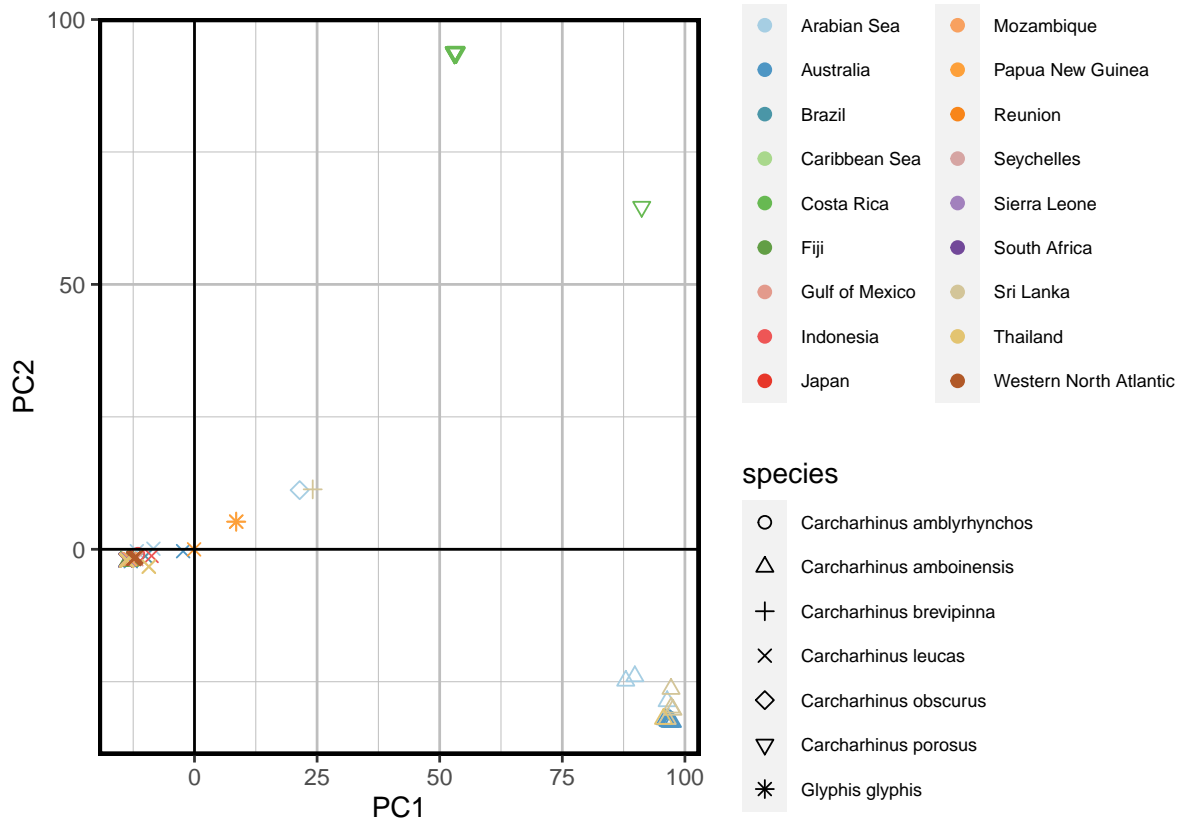

```
ggplot2::ggsave(p, filename = "DARtseq_SF_SpeciesID_PCA1.png",
               width = 30, height = 15, units = "cm")

p <- ggplot2::ggplot(BS.pca.scores, ggplot2::aes(x = PC1, y = PC3, colour = pop,
                                                group = species)) +
  ggplot2::geom_point(aes(shape = species), size = 2) +
  ggplot2::scale_color_manual(values = cols) +
  ggplot2::scale_shape_manual(values = c(1,2,3,4,5,6,8,9)) +
  ggplot2::geom_hline(yintercept = 0) +
  ggplot2::geom_vline(xintercept = 0) +
  ggplot2::theme(panel.background = ggplot2::element_rect(fill = "white",
                                                         colour = "white"),
                panel.grid.major = ggplot2::element_line(size = 0.5,
                                                         linetype = 'solid',
                                                         colour = "grey"),
                panel.grid.minor = ggplot2::element_line(size = 0.1,
                                                         linetype = 'solid',
                                                         colour = "grey"),
                legend.text = ggplot2::element_text(size = 7),
                legend.position = "right",
                panel.border = element_rect(colour = "black", fill = NA,
                                           size = 1.5)) +
  ggplot2::guides(shape = ggplot2::guide_legend(ncol = 1),
                 col = ggplot2::guide_legend(ncol = 2),
                 override.aes = list(size = 0.5))
```

p

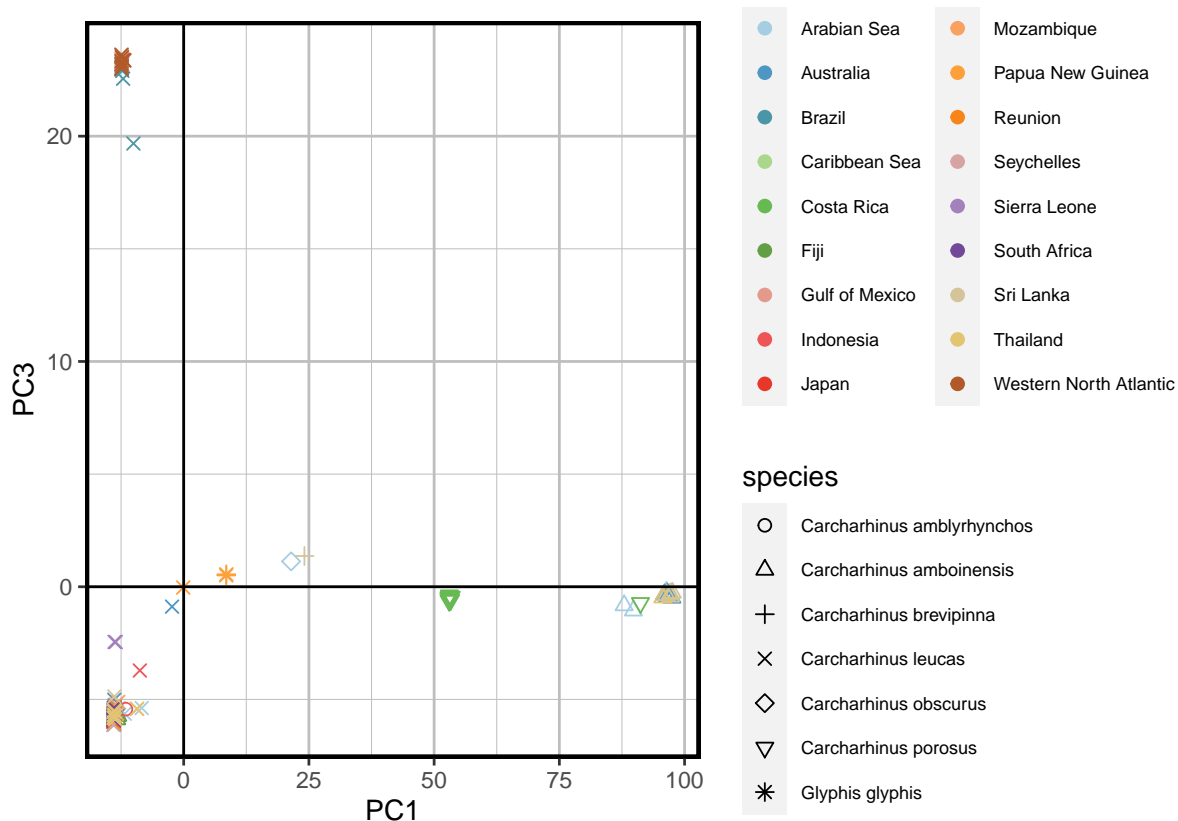

```
ggplot2::ggsave(p, filename = "DARtseq_SF_SpeciesID_PCA2.png", width = 30,
  height = 15,units = "cm")

p <- ggplot2::ggplot(BS.pca.scores, ggplot2::aes(x = PC2, y = PC3, colour = pop,
  group = species)) +
  ggplot2::geom_point(aes(shape = species), size = 2) +
  ggplot2::scale_color_manual(values = cols) +
  ggplot2::scale_shape_manual(values = c(1,2,3,4,5,6,8,9)) +
  ggplot2::geom_hline(yintercept = 0) +
  ggplot2::geom_vline(xintercept = 0) +
  ggplot2::theme(panel.background = ggplot2::element_rect(fill = "white",
    colour = "white"),
    panel.grid.major = ggplot2::element_line(size = 0.5,
    linetype = 'solid',
    colour = "grey"),
    panel.grid.minor = ggplot2::element_line(size = 0.1,
    linetype = 'solid',
    colour = "grey"),
    legend.text = ggplot2::element_text(size = 7),
    legend.position = "right",
    panel.border = element_rect(colour = "black",
    fill = NA, size = 1.5)) +
  ggplot2::guides(shape = ggplot2::guide_legend(ncol = 1),
    col = ggplot2::guide_legend(ncol = 2),
    override.aes = list(size = 0.5))
```

p



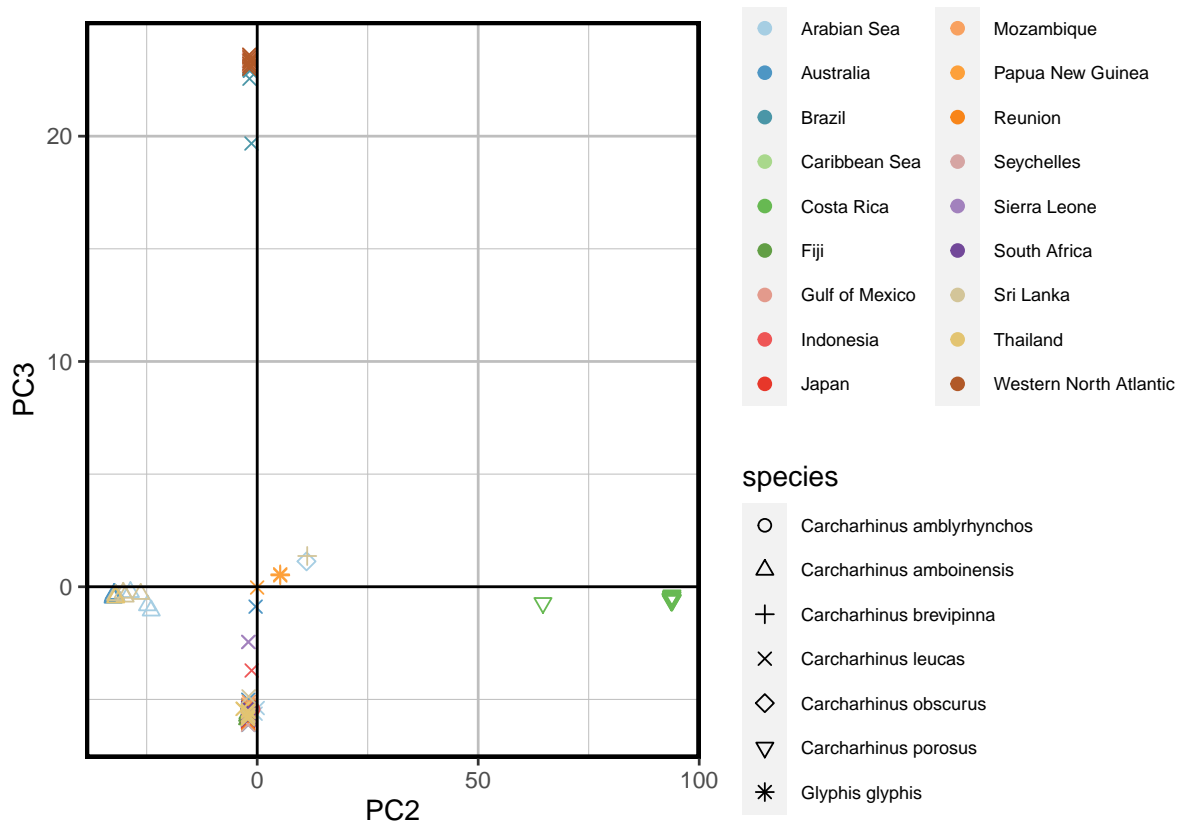

```
ggplot2::ggsave(p, filename = "DArTseq_SF_SpeciesID_PCA3.png",
               width = 30, height = 15, units = "cm")

p <- ggplot2::ggplot(BS.pca.scores, ggplot2::aes(x = PC3, y = PC4, colour = pop,
                                                group = species)) +
  ggplot2::geom_point(aes(shape = species), size = 2) +
  ggplot2::scale_color_manual(values = cols) +
  ggplot2::scale_shape_manual(values = c(1,2,3,4,5,6,8,9)) +
  ggplot2::geom_hline(yintercept = 0) +
  ggplot2::geom_vline(xintercept = 0) +
  ggplot2::theme(panel.background = ggplot2::element_rect(fill = "white",
                                                         colour = "white"),
                panel.grid.major = ggplot2::element_line(size = 0.5,
                                                         linetype = 'solid',
                                                         colour = "grey"),
                panel.grid.minor = ggplot2::element_line(size = 0.1,
                                                         linetype = 'solid',
                                                         colour = "grey"),
                legend.text = ggplot2::element_text(size = 7),
                legend.position = "right",
                panel.border = element_rect(colour = "black",
                                           fill = NA, size = 1.5)) +
  ggplot2::guides(shape = ggplot2::guide_legend(ncol = 1),
                 col = ggplot2::guide_legend(ncol = 2),
                 override.aes = list(size = 0.5))
```

p

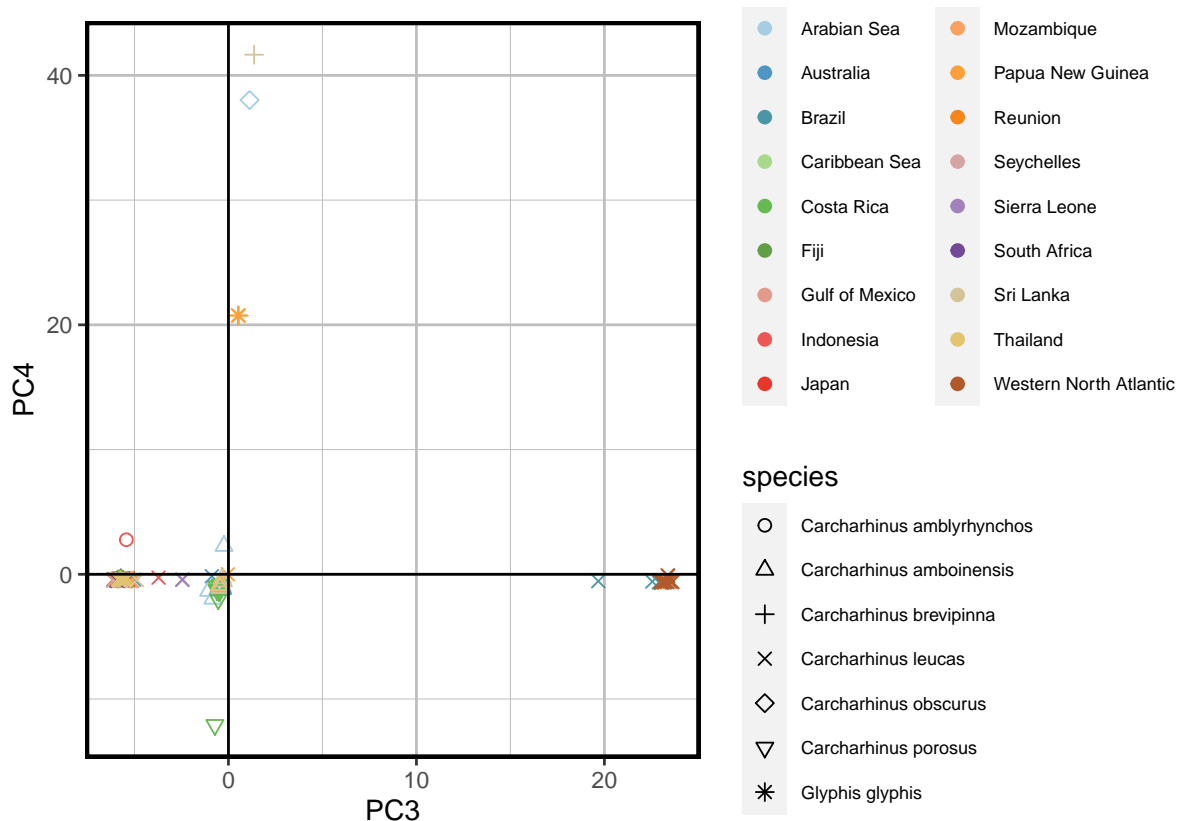

```
ggplot2::ggsave(p, filename = "DARtseq_SF_SpeciesID_PCA4.png",
               width = 30, height = 15, units = "cm")

p <- ggplot2::ggplot(BS.pca.scores, ggplot2::aes(x = PC2, y = PC4, colour = pop,
                                                group = species)) +
  ggplot2::geom_point(aes(shape = species), size = 2) +
  ggplot2::scale_color_manual(values = cols) +
  ggplot2::scale_shape_manual(values = c(1,2,3,4,5,6,8,9)) +
  ggplot2::geom_hline(yintercept = 0) +
  ggplot2::geom_vline(xintercept = 0) +
  ggplot2::theme(panel.background = ggplot2::element_rect(fill = "white",
                                                         colour = "white"),
                panel.grid.major = ggplot2::element_line(size = 0.5,
                                                         linetype = 'solid',
                                                         colour = "grey"),
                panel.grid.minor = ggplot2::element_line(size = 0.1,
                                                         linetype = 'solid',
                                                         colour = "grey"),
                legend.text = ggplot2::element_text(size = 7),
                legend.position = "right",
                panel.border = element_rect(colour = "black",
                                           fill = NA, size = 1.5)) +
  ggplot2::guides(shape = ggplot2::guide_legend(ncol = 1),
                 col = ggplot2::guide_legend(ncol = 2),
                 override.aes = list(size = 0.5))
```

p

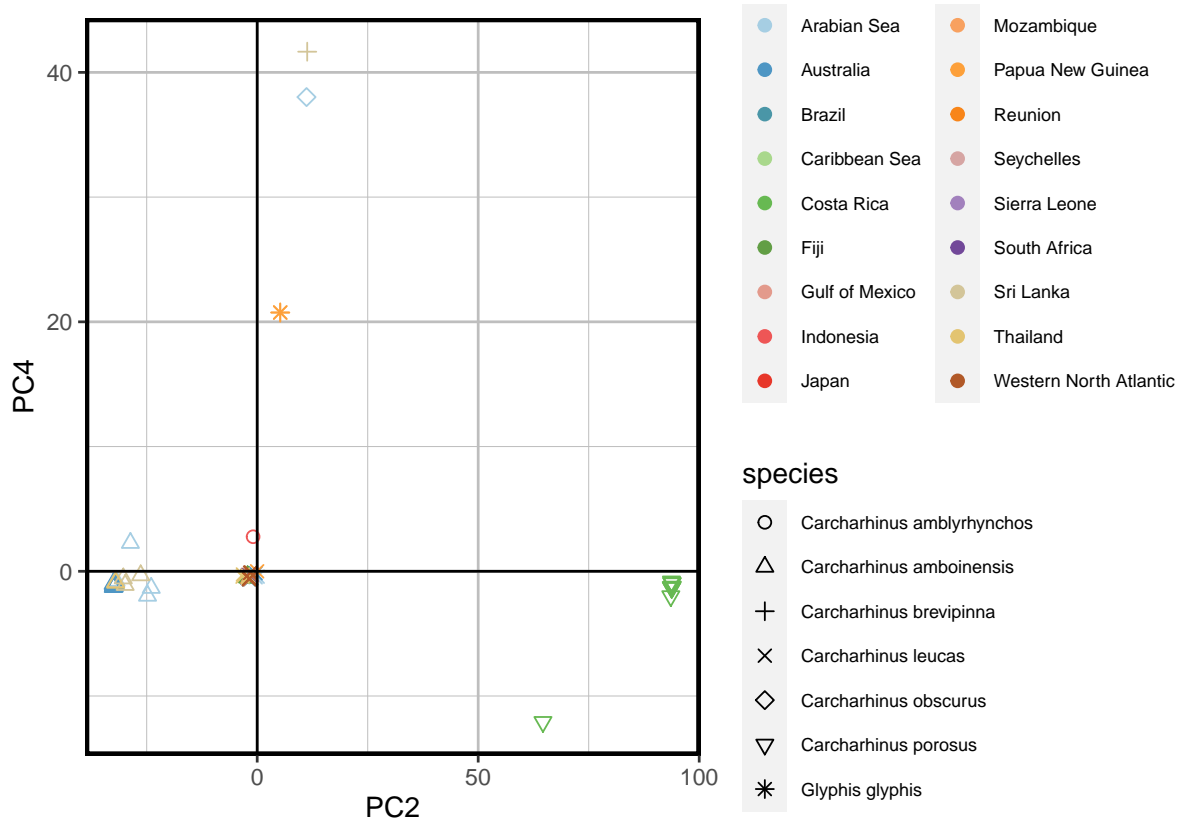

```
ggplot2::ggsave(p, filename = "DArTseq_SF_SpeciesID_PCA4.png",
  width = 30, height = 15, units = "cm")
```

## 5 DArTseq - Only Bull Shark

### 5.1 Set strata

```
strata <- radiator::read_strata("Bull_shark_DArTseq_strata.tsv",
                              keep.two = FALSE)$strata %>%
  dplyr::filter(SpeciesID_genetic == "Carcharhinus leucas")
# readr::write_tsv(strata, path = "Bull_shark_DArTseq_strata2.tsv")
```

### 5.2 Filter data

1. Marker Reproducibility: 0.98
2. Individual missingness: 0.2
3. Individual Het - low: 0
4. Individual Het - high: 0.1
5. Individual total coverage - low: 7,000
6. Individual total coverage - high: 10,000,000
7. Marker MAC - low: 4
8. Marker coverage - low: 5
9. Marker coverage - high:39
10. Marker maximum missing proportion: 0.1
11. Marker snp position on locus: n
12. Max 3 SNPs per locus
13. 1 SNP per locus according to mac
14. no LD filter
15. Individual Het - low: 0
16. Individual Het - high: 0.132
17. Duplicated individuals: 0.1
18. Filter on HWE: 2 pop, 0.01

```
dartseq.data <- "DArTseq_SNP_OrderAppendix_2_DCarcha19-4454.csv"
strata <- "Bull_shark_DArTseq_strata2.tsv"
BSsnp <- radiator::filter_rad(dartseq.data, strata,
                              parallel.core = 1)
BS.dartseq.gds <- BSsnp$gds
BS.dartseq.tidy <- BSsnp$output$tidy.data
print(BS.dartseq.gds, expand=TRUE, all=TRUE, attribute=TRUE,
      attribute.trim=FALSE)
save(BS.dartseq.tidy, file = "DArTseq_ALL_objects2.Rdata")
```

Table 2:

| FILTERS                                    | VALUES        | BEFORE                         | BLACKLIST                  |
|--------------------------------------------|---------------|--------------------------------|----------------------------|
| Filter DArT reproducibility                | 0.98          | 182 / 29 / 1 / 168810 / 250945 | 0 / 0 / 0 / 9754 / 19242   |
| Filter monomorphic markers                 | NA            | 182 / 29 / 1 / 159056 / 231703 | 0 / 0 / 0 / 97626 / 156667 |
| Filter markers in common                   | NA            | 182 / 29 / 1 / 61430 / 75036   | 0 / 0 / 0 / 12699 / 15156  |
| Filter individuals based on missingness    | 0.2           | 182 / 29 / 1 / 48731 / 59880   | 4 / 0 / 0 / 0 / 0          |
| Filter individuals based on heterozygosity | 0 0.1         | 178 / 29 / 1 / 48731 / 59880   | 1 / 0 / 0 / 0 / 0          |
| Filter individuals based on total coverage | 7000 1e+07    | 177 / 29 / 1 / 48731 / 59880   | 0 / 0 / 0 / 0 / 0          |
| Filter monomorphic markers                 | NA            | 177 / 29 / 1 / 48731 / 59880   | 0 / 0 / 0 / 2510 / 3417    |
| Filter MAC                                 | 4             | 177 / 29 / 1 / 46221 / 56463   | 0 / 0 / 0 / 25024 / 33343  |
| Filter coverage min / max                  | 5-39          | 177 / 29 / 1 / 21197 / 23120   | 0 / 0 / 0 / 2311 / 2382    |
| Filter genotyping                          | 0.1           | 177 / 29 / 1 / 18886 / 20738   | 0 / 0 / 0 / 266 / 393      |
| Filter SNPs position on the read           | all           | 177 / 29 / 1 / 18620 / 20345   | 0 / 0 / 0 / 0 / 0          |
| Filter markers snp number                  | 1             | 177 / 29 / 1 / 18620 / 20345   | 0 / 0 / 0 / 1590 / 3315    |
| Filter short ld                            | not filtering | 177 / 29 / 1 / 17030 / 17030   | 0 / 0 / 0 / 0 / 0          |
| detect mixed genomes                       | 0 0.132       | 177 / 29 / 1 / 17030 / 17030   | 5 / 0 / 0 / 0 / 0          |
| Filter monomorphic markers                 | NA            | 172 / 29 / 1 / 17030 / 17030   | 0 / 0 / 0 / 0 / 0          |
| detect duplicate genomes                   | 0.1           | 172 / 29 / 1 / 17030 / 17030   | 23 / 0 / 0 / 0 / 0         |
| Filter monomorphic markers                 | NA            | 149 / 29 / 1 / 17030 / 17030   | 0 / 0 / 0 / 0 / 0          |
| Filter HWE                                 | 20.01         | 149 / 29 / 1 / 17030 / 17030   | 0 / 0 / 0 / 1 / 1          |

### 5.3 Save data

```

BSconvert <- radiator::genomic_converter(BS.dartseq.gds,
                                         output = c("genlight", "stockr",
                                                    "pcadapt", "gtypes"))

BS.dartseq.gl <- BSconvert$genlight
BS.dartseq.stkr <- BSconvert$stockr
BS.dartseq.pc <- BSconvert$pcadapt
BS.dartseq.gt <- BSconvert$gtypes

markers.meta <- radiator::extract_markers_metadata(BS.dartseq.gds, whitelist = TRUE)
individuals.meta <- radiator::extract_individuals_metadata(BS.dartseq.gds,
                                                         whitelist = TRUE)

BS.dartseq.gl$other$ind.metrics <- individuals.meta
BS.dartseq.gl$other$loc.metrics <- markers.meta
BS.dartseq.gt@schemes <- individuals.meta

pop.levels <- c("Brazil","Caribbean Sea","Gulf of Mexico", "Western North Atlantic",
               "Sierra Leone", "South Africa", "Mozambique", "Reunion" ,
               "Seychelles", "Arabian Sea", "Sri Lanka", "Thailand", "Indonesia",
               "Papua New Guinea" , "Fitzroy River", "Daly River", "Adelaide River",
               "South Alligator River", "East Alligator River","Blue mud Bay",
               "Roper River","Town's River","Wenlock River","Trinity inlet","Clarence River",
               "Sydney Harbour","Okinawa", "Urauchi River", "Fiji")

BS.dartseq.gl$pop <- factor(stringr::str_replace_all(
  string = BS.dartseq.gl$other$ind.metrics$STRATA,
  pattern = "_", replacement = " "))
BS.dartseq.gl$pop <- factor(BS.dartseq.gl$pop, levels = pop.levels)

BS.dartseq.gl <- BS.dartseq.gl[order(BS.dartseq.gl$pop, BS.dartseq.gl$ind.names),]

pop.levels1 <- c("Brazil","Caribbean Sea","Gulf of Mexico", "Western North Atlantic",
               "Sierra Leone", "South Africa", "Mozambique", "Reunion" , "Seychelles",
               "Arabian Sea", "Sri Lanka", "Thailand", "Indonesia", "Papua New Guinea" ,
               "Australia", "Japan", "Fiji")

BS.dartseq.tidy$POP_ID <- factor(BS.dartseq.tidy$Site, levels = pop.levels1)
BS.dartseq.tidy <- BS.dartseq.tidy[order(BS.dartseq.tidy$POP_ID,
                                         BS.dartseq.tidy$INDIVIDUALS),]

save(BS.dartseq.tidy, BS.dartseq.gl, BS.dartseq.stkr, BS.dartseq.pc,BS.dartseq.gt,
     markers.meta, individuals.meta, file = "DARtseq_ALL_objects2.Rdata")
# save(BS.dartseq.gl, BS.dartseq.stkr, BS.dartseq.pc,BS.dartseq.gt,
# markers.meta, individuals.meta, file = "DARtseq_ALL_objects3.Rdata")
# save(BS.dartseq.tidy,
#       file = "DARtseq_ALL_objects4.Rdata")
# object.size(BS.dartseq.tidy) #2,033,649,160 bytes

```

## 5.4 Load data

```

# load("DARtseq_ALL_objects2.Rdata")
load("DARtseq_ALL_objects3.Rdata")
adegenet::nInd(BS.dartseq.gl) # 149
adegenet::nLoc(BS.dartseq.gl) # 16989
summary(BS.dartseq.gl$pop)
sum(duplicated(stringr::str_match(pattern = "-\\s*(.*?)\\s*-",
                                string = BS.dartseq.gl$ind.names)[,2])) # 0 replicate left

```

```
## [1] 149
## [1] 16989
##           Brazil           Caribbean Sea           Gulf of Mexico
##           11                2                11
## Western North Atlantic           Sierra Leone           South Africa
##           8                1                9
##           Mozambique           Reunion           Seychelles
##           8                9                10
##           Arabian Sea           Sri Lanka           Thailand
##           6                4                6
##           Indonesia           Papua New Guinea           Australia
##           4                3                37
##           Japan           Fiji
##           12                8
## [1] 0
```

## 5.5 Remove sex-linked markers

```
load("Sex_results.Rdata")
sum(BS.dartseq.gl$loc.names %in% bull_shark$sexy.summary$CLONE_ID ) #24
sex.markers <- bull_shark$sexy.summary$CLONE_ID

locnames <- BS.dartseq.gl$loc.names
BS.dartseq.gl <- BS.dartseq.gl[,!locnames %in% bull_shark$sexy.summary$CLONE_ID]
BS.dartseq.gl$other$loc.metrics <-
  BS.dartseq.gl$other$loc.metrics[!locnames %in%
    bull_shark$sexy.summary$CLONE_ID,]

sum(sex.markers %in% unique(BS.dartseq.tidy$LOCUS)) # 24
BS.dartseq.tidy <- BS.dartseq.tidy[!BS.dartseq.tidy$LOCUS %in% sex.markers,]

locus.gt <- stringr::str_match(pattern = "__\\s*(.*?)\\s*__",
  string = BS.dartseq.gt@data$locus)[,2]
BS.dartseq.gt <- BS.dartseq.gt[,!locus.gt %in% sex.markers, , drop = TRUE]
```

## 5.6 Genetic diversity

```
set.seed(124)
gl <- BS.dartseq.gl
pop.levels <- c("Brazil","Caribbean Sea","Gulf of Mexico", "Western North Atlantic",
  "South Africa", "Mozambique", "Reunion", "Seychelles", "Arabian Sea",
  "Sri Lanka", "Thailand", "Indonesia", "Papua New Guinea", "Australia",
  "Japan", "Fiji")
gl <- gl[gl$pop != "Sierra Leone"] #only 1 sample
gl$pop <- factor(gl$other$ind.metrics$Site, levels = pop.levels)
gl <- gl[order(gl$pop, gl$ind.names)]

gl2gpop(gl, filename = "BS_dartseq_all_genepop2.txt")
bastat <- diveRsity::basicStats(infile = "BS_dartseq_all_genepop2.txt",
  outfile = "BS_dartseq_all_BasicStat_output.txt",
  fis_ci = TRUE, ar_ci = TRUE, fis_boots = 1000,
  ar_boots = 1000, mc_reps = 1000,
  rarefaction = FALSE, ar_alpha = 0.05, fis_alpha = 0.05)

length(bastat$main_tab) #16
gendiv <- data.frame(
  "Brazil" = bastat$main_tab[[1]]$overall,
  "Caribbean Sea" = bastat$main_tab[[2]]$overall,
```

```

"Gulf of Mexico" = bastat$main_tab[[3]]$overall,
"Western North Atlantic" = bastat$main_tab[[4]]$overall,
"South Africa" = bastat$main_tab[[5]]$overall,
"Mozambique" = bastat$main_tab[[6]]$overall,
"Reunion" = bastat$main_tab[[7]]$overall,
"Seychelles" = bastat$main_tab[[8]]$overall,
"Arabian Sea" = bastat$main_tab[[9]]$overall,
"Sri Lanka" = bastat$main_tab[[10]]$overall,
"Thailand" = bastat$main_tab[[11]]$overall,
"Indonesia" = bastat$main_tab[[12]]$overall,
"Papua New Guinea" = bastat$main_tab[[13]]$overall,
"Australia" = bastat$main_tab[[14]]$overall,
"Japan" = bastat$main_tab[[15]]$overall,
"Fiji" = bastat$main_tab[[16]]$overall,
check.names = FALSE)
rownames(gendiv) <- rownames(bastat$main_tab[[1]])

df <- as.data.frame(gl)
df[df == "0"] <- "11"
df[df == "1"] <- "12"
df[df == "2"] <- "22"
gen.gi <- adegenet::df2genind(df, ploidy = 2, ncode = 2, pop = gl$pop)
ris_basic <- hierfstat::basic.stats(gen.gi)
fis.hierfstat <- apply(ris_basic$Fis, 2, mean, na.rm=T)
fis.CI <- hierfstat::boot.ppfis(gen.gi, nboot = 1000, quant = c(0.025,0.975),
                             diploid = TRUE, dig = 4)
df <- data.frame(fis.hierfstat, fis.CI.low = fis.CI$fis.ci[,1],
                fis.CI.high = fis.CI$fis.ci[,2])
df <- as.data.frame(t(df))
gendiv <- rbind(gendiv, df)

readr::write_tsv(gendiv, file = "DARtseq_ALL_gendiv2.txt")
save(gendiv, file = "DARtseq_ALL_gendiv2.Rdata")

load("DARtseq_ALL_gendiv2.Rdata")
shortnames <- c("BRZ", "CAR", "GOM", "WNA", "SAF", "MOZ", "RUN", "SEY",
               "ARS", "SRL", "TAI", "IND", "PNG", "AUS", "JAP", "FIJ")
knitr::kable(gendiv, col.names = shortnames, caption = "", digits = 4) %>%
  kableExtra::kable_styling(full_width = FALSE, font_size = 5,
                            latex_options = c("hold_position")) %>%
  kableExtra::landscape()

```

Table 3:

|               | BRZ     | CAR     | GOM     | WNA     | SAF     | MOZ     | RUN     | SEY     | ARS     | SRL     | TAI     | IND     | PNG     | AUS     | JAP     | FIJ     |
|---------------|---------|---------|---------|---------|---------|---------|---------|---------|---------|---------|---------|---------|---------|---------|---------|---------|
| ar            | 1.1500  | 1.1150  | 1.1440  | 1.1430  | 1.1890  | 1.1810  | 1.1880  | 1.1910  | 1.1830  | 1.1810  | 1.1890  | 1.1660  | 1.1750  | 1.1970  | 1.1880  | 1.1810  |
| size          | 10.9420 | 1.9890  | 10.9430 | 7.9550  | 8.9680  | 7.8580  | 8.9650  | 9.9550  | 5.9610  | 3.9880  | 5.9790  | 3.9840  | 2.9920  | 36.8550 | 11.9630 | 7.9390  |
| obs_het       | 0.0840  | 0.0800  | 0.0810  | 0.0820  | 0.1060  | 0.1020  | 0.1050  | 0.1070  | 0.1050  | 0.1060  | 0.1120  | 0.1060  | 0.1160  | 0.1050  | 0.1080  | 0.1020  |
| exp_het       | 0.0840  | 0.0620  | 0.0810  | 0.0800  | 0.1050  | 0.1040  | 0.1040  | 0.1050  | 0.1010  | 0.0960  | 0.1010  | 0.0890  | 0.0930  | 0.1090  | 0.1010  | 0.1010  |
| uexp_het      | 0.0880  | 0.0830  | 0.0840  | 0.0850  | 0.1110  | 0.1110  | 0.1100  | 0.1110  | 0.1110  | 0.1100  | 0.1100  | 0.1020  | 0.1120  | 0.1100  | 0.1050  | 0.1080  |
| fis           | -0.0120 | -0.2960 | -0.0160 | -0.0340 | -0.0230 | -0.0030 | -0.0290 | -0.0240 | -0.0460 | -0.1140 | -0.1000 | -0.1840 | -0.2310 | 0.0270  | -0.0600 | -0.0220 |
| hwe_glb       | 1.0000  | 1.0000  | 1.0000  | 1.0000  | 1.0000  | 1.0000  | 1.0000  | 1.0000  | 1.0000  | 1.0000  | 1.0000  | 1.0000  | 1.0000  | 1.0000  | 1.0000  | 1.0000  |
| hwe_hom       | 1.0000  | 1.0000  | 1.0000  | 1.0000  | 1.0000  | 1.0000  | 1.0000  | 1.0000  | 1.0000  | 1.0000  | 1.0000  | 1.0000  | 1.0000  | 1.0000  | 1.0000  | 1.0000  |
| hwe_het       | 1.0000  | 1.0000  | 1.0000  | 1.0000  | 1.0000  | 1.0000  | 1.0000  | 1.0000  | 1.0000  | 1.0000  | 1.0000  | 1.0000  | 1.0000  | 1.0000  | 1.0000  | 1.0000  |
| fis_lo        | -0.0870 | -1.0000 | -0.0910 | -0.1340 | -0.1220 | -0.1180 | -0.1250 | -0.1080 | -0.2000 | -0.3520 | -0.3050 | -0.5580 | -1.0000 | 0.0080  | -0.1390 | -0.1480 |
| fis_hi        | -0.0240 | -0.2960 | -0.0280 | -0.0460 | -0.0350 | -0.0120 | -0.0400 | -0.0360 | -0.0590 | -0.1140 | -0.1080 | -0.1840 | -0.2310 | 0.0200  | -0.0670 | -0.0350 |
| ar_lo         | 1.0770  | 1.0710  | 1.0750  | 1.0740  | 1.1000  | 1.0680  | 1.0990  | 1.1020  | 1.0990  | 1.0970  | 1.1000  | 1.0970  | 1.1020  | 1.1070  | 1.1010  | 1.0900  |
| ar_hi         | 1.1610  | 1.1530  | 1.1560  | 1.1590  | 1.2060  | 1.2060  | 1.2050  | 1.2070  | 1.2070  | 1.2050  | 1.2190  | 1.2040  | 1.2150  | 1.2130  | 1.2100  | 1.2020  |
| fis.hierfstat | 0.0326  | -0.0480 | 0.0283  | 0.0277  | 0.0312  | 0.0576  | 0.0261  | 0.0246  | 0.0360  | 0.0111  | -0.0176 | -0.0627 | -0.0662 | 0.0399  | -0.0190 | 0.0388  |
| fis.CI.low    | 0.0359  | 0.0230  | 0.0293  | 0.0315  | 0.0379  | 0.0755  | 0.0340  | 0.0270  | 0.0468  | 0.0264  | -0.0295 | -0.0660 | -0.0571 | 0.0432  | -0.0378 | 0.0523  |
| fis.CI.high   | 0.0552  | 0.0754  | 0.0501  | 0.0572  | 0.0571  | 0.0963  | 0.0526  | 0.0450  | 0.0711  | 0.0551  | -0.0072 | -0.0334 | -0.0233 | 0.0529  | -0.0203 | 0.0720  |



### 5.6.1 Number of monomorphic markers per population

```

pop.levels <- c("Brazil","Caribbean Sea","Gulf of Mexico", "Western North Atlantic",
              "Sierra Leone", "South Africa", "Mozambique", "Reunion" , "Seychelles",
              "Arabian Sea", "Sri Lanka", "Thailand", "Indonesia", "Papua New Guinea",
              "Australia", "Japan", "Fiji")
BS.dartseq.gl$pop <- factor(BS.dartseq.gl$other$ind.metrics$Site, levels = pop.levels)
BS.dartseq.gl <- BS.dartseq.gl[order(BS.dartseq.gl$pop, BS.dartseq.gl$ind.names)]

monomorphics <- c()
for (i in 1:length(pop.levels)) {
  x <- BS.dartseq.gl[BS.dartseq.gl$pop == pop.levels[i]]
  x2 <- dartR::gl.filter.monomorphs(x, verbose = 0)
  locs <- adegenet::nLoc(x) - adegenet::nLoc(x2)
  monomorphics[i] <- locs
}
names(monomorphics) <- pop.levels
shortnames <- c("BRZ", "CAR", "GOM", "WNA","SIL", "SAF", "MOZ", "RUN" , "SEY",
              "ARS", "SRL", "TAI", "IND", "PNG" , "AUS", "JAP", "FIJ")
knitr::kable(t(as.table(monomorphics)), col.names = shortnames, digits = 4,
             caption = "") %>%
  kableExtra::kable_styling(full_width = FALSE,font_size = 5,
                            latex_options = c( "hold_position"))

```

Table 4:

| BRZ  | CAR   | GOM   | WNA   | SIL   | SAF  | MOZ  | RUN  | SEY  | ARS   | SRL   | TAI   | IND   | PNG   | AUS  | JAP  | FIJ   |
|------|-------|-------|-------|-------|------|------|------|------|-------|-------|-------|-------|-------|------|------|-------|
| 9909 | 12609 | 10058 | 10432 | 16440 | 9502 | 9943 | 9712 | 9348 | 10818 | 11947 | 10945 | 12709 | 12884 | 5415 | 9821 | 10483 |

### 5.6.2 Nucleotide diversity and inbreeding

```

pi.sum <- radiator::pi(
  data = BS.dartseq.tidy,
  read.length = 70,
  parallel.core = parallel::detectCores() - 1,
  path.folder = NULL,
  verbose = TRUE
)

FIS.sum<- radiator::ibd_g_fh(data = BS.dartseq.tidy,
  path.folder = NULL, verbose = TRUE)

save(pi.sum, FIS.sum, file = "DARtseq_ALL_pi_FIS_Sites2.Rdata")
# boxplot.pi <- pi.sum$boxplot.pi
# fh.box.plot <- FIS.sum$fh.box.plot
# save(boxplot.pi, fh.box.plot, file = "DARtseq_ALL_pi_FIS_Sites3.Rdata")

load("DARtseq_ALL_pi_FIS_Sites3.Rdata")
boxplot.pi

```

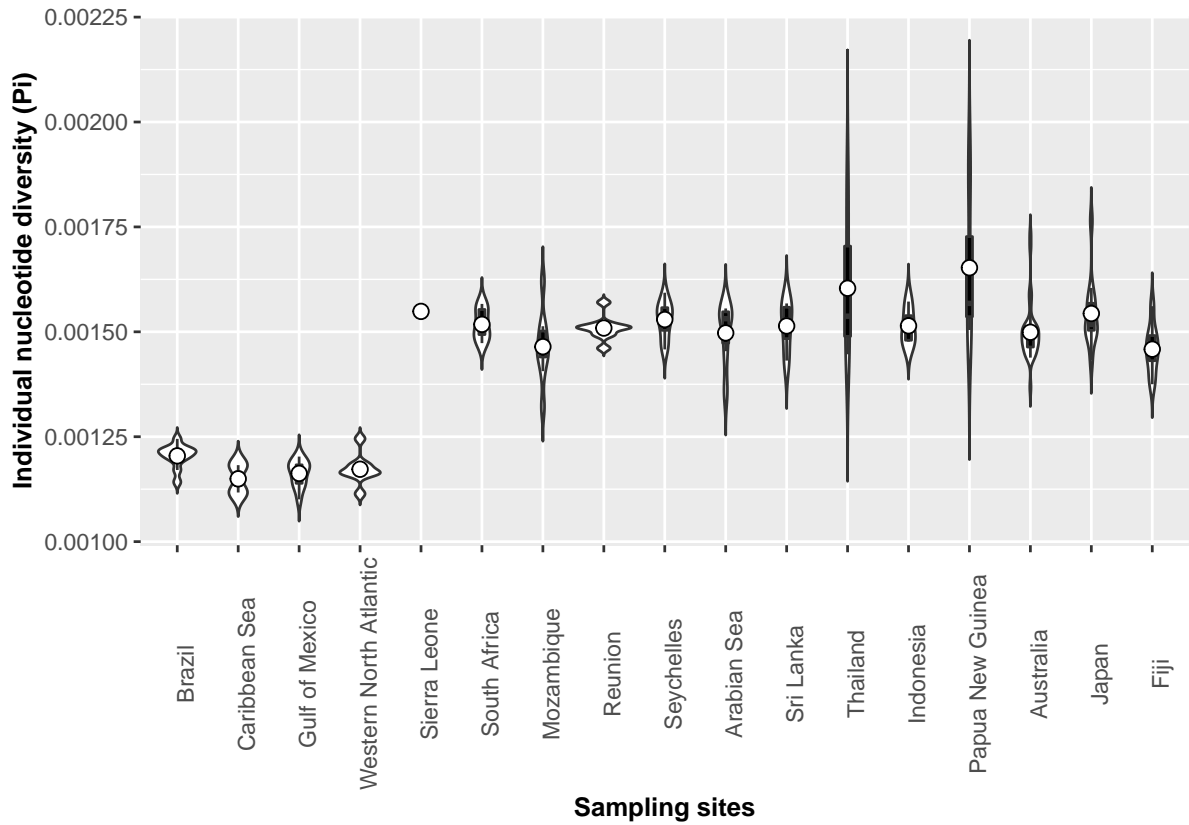

```
fh.box.plot
```

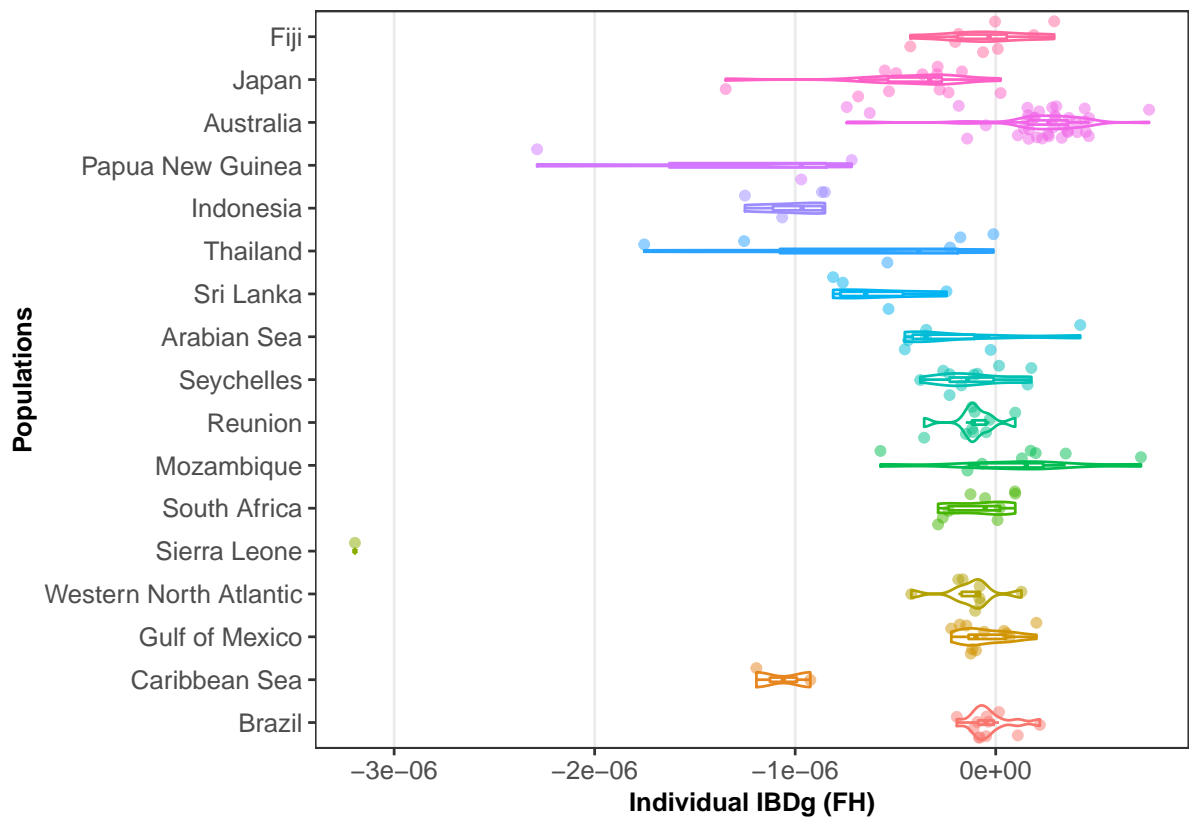

```
# pi.sum$boxplot.pi
# FIS.sum$fh.box.plot
```

## 5.7 Genetic differentiation

```
Fst.gt <- strataG::popStructTest(
  BS.dartseq.gt,
  nrep = 1000,
  stats = "all",
  type = "pairwise",
  keep.null = FALSE,
  quietly = TRUE,
  nb.cores = parallel::detectCores() - 1,
  write.output = FALSE
)
save(Fst.gt, file = "DARtseq_ALL_FST.Rdata")
readr::write_tsv(Fst.gt$pairwise$result, path = "DARtseq_ALL_FST.txt")

load("DARtseq_ALL_FST.Rdata")
kableExtra::kbl(Fst.gt$pairwise$result[order(Fst.gt$pairwise$result$Fst,
                                             decreasing = TRUE),
                                             -c(1:4)], digits = 4,
  caption = "Pairwise Fst for 16989 DARtseq loci between the all sites",
  longtable = TRUE, booktabs = T) %>%
kableExtra::kable_styling(full_width = FALSE, font_size = 5,
  latex_options = c("repeat_header", "hold_position")) %>%
kableExtra::landscape()
```

Table 5: Pairwise F<sub>st</sub> for 16989 DArTseq loci between the all sites

|                                                    | Chi2       | Chi2.p.val | D      | D.p.val | Fis      | Fis.p.val | Fst    | Fst.p.val | F'st   | F'st.p.val | Gst    | Gst.p.val | G'st   | G'st.p.val | G''st  | G''st.p.val |
|----------------------------------------------------|------------|------------|--------|---------|----------|-----------|--------|-----------|--------|------------|--------|-----------|--------|------------|--------|-------------|
| Gulf_of_Mexico (11) v. Papua_New_Guinea (2)        | 77033.084  | 0.0120     | 0.1109 | 0.0120  | -5.2515  | 1.0000    | 0.6747 | 0.0451    | 0.7753 | 0.0451     | 0.6907 | 0.0622    | 0.8012 | 0.0622     | 0.8824 | 0.0622      |
| Gulf_of_Mexico (11) v. Indonesia (4)               | 93596.844  | 0.0010     | 0.1191 | 0.0010  | -2.7267  | 1.0000    | 0.6733 | 0.0011    | 0.7762 | 0.0011     | 0.5738 | 0.0011    | 0.7147 | 0.0011     | 0.8187 | 0.0011      |
| Papua_New_Guinea (2) v. Western_North_Atlantic (8) | 61638.548  | 0.0240     | 0.1104 | 0.0240  | -6.3798  | 1.0000    | 0.6713 | 0.0745    | 0.7803 | 0.0745     | 0.7239 | 0.0811    | 0.8241 | 0.0811     | 0.8980 | 0.0811      |
| Indonesia (4) v. Western_North_Atlantic (8)        | 76570.194  | 0.0030     | 0.1185 | 0.0030  | -3.0371  | 1.0000    | 0.6695 | 0.0033    | 0.7780 | 0.0033     | 0.5893 | 0.0033    | 0.7263 | 0.0033     | 0.8278 | 0.0033      |
| Gulf_of_Mexico (11) v. Thailand (4)                | 92623.543  | 0.0010     | 0.1141 | 0.0010  | -2.1662  | 1.0000    | 0.6642 | 0.0011    | 0.7678 | 0.0011     | 0.5473 | 0.0011    | 0.6931 | 0.0011     | 0.8016 | 0.0011      |
| Gulf_of_Mexico (11) v. Sri_Lanka (4)               | 92859.069  | 0.0020     | 0.1144 | 0.0020  | -2.0099  | 1.0000    | 0.6614 | 0.0023    | 0.7655 | 0.0023     | 0.5382 | 0.0023    | 0.6865 | 0.0023     | 0.7962 | 0.0023      |
| Brazil (11) v. Indonesia (4)                       | 90951.536  | 0.0010     | 0.1171 | 0.0010  | -2.4811  | 1.0000    | 0.6608 | 0.0012    | 0.7656 | 0.0012     | 0.5577 | 0.0012    | 0.7010 | 0.0012     | 0.8080 | 0.0012      |
| Brazil (11) v. Papua_New_Guinea (2)                | 74133.916  | 0.0130     | 0.1090 | 0.0130  | -4.5918  | 1.0000    | 0.6606 | 0.0491    | 0.7636 | 0.0491     | 0.6659 | 0.0522    | 0.7829 | 0.0522     | 0.8697 | 0.0522      |
| Thailand (4) v. Western_North_Atlantic (8)         | 75824.367  | 0.0030     | 0.1136 | 0.0030  | -2.4040  | 1.0000    | 0.6593 | 0.0033    | 0.7691 | 0.0033     | 0.5607 | 0.0033    | 0.7036 | 0.0033     | 0.8101 | 0.0033      |
| Fiji (8) v. Gulf_of_Mexico (11)                    | 121032.342 | 0.0010     | 0.1201 | 0.0010  | -1.3537  | 1.0000    | 0.6562 | 0.0010    | 0.7674 | 0.0010     | 0.5119 | 0.0010    | 0.6660 | 0.0010     | 0.7791 | 0.0010      |
| Sri_Lanka (4) v. Western_North_Atlantic (8)        | 75994.828  | 0.0030     | 0.1139 | 0.0030  | -2.2407  | 1.0000    | 0.6560 | 0.0032    | 0.7668 | 0.0032     | 0.5515 | 0.0032    | 0.6970 | 0.0032     | 0.8047 | 0.0032      |
| Gulf_of_Mexico (11) v. Japan (11)                  | 140297.363 | 0.0010     | 0.1201 | 0.0010  | -1.0983  | 1.0000    | 0.6528 | 0.0010    | 0.7624 | 0.0010     | 0.5043 | 0.0010    | 0.6594 | 0.0010     | 0.7736 | 0.0010      |
| Brazil (11) v. Thailand (4)                        | 89962.341  | 0.0020     | 0.1121 | 0.0020  | -2.0210  | 1.0000    | 0.6518 | 0.0023    | 0.7573 | 0.0023     | 0.5335 | 0.0024    | 0.6810 | 0.0024     | 0.7920 | 0.0024      |
| Arabian_Sea (6) v. Gulf_of_Mexico (11)             | 106824.672 | 0.0010     | 0.1146 | 0.0010  | -1.2937  | 1.0000    | 0.6515 | 0.0010    | 0.7631 | 0.0010     | 0.5039 | 0.0010    | 0.6587 | 0.0010     | 0.7730 | 0.0010      |
| Fiji (8) v. Western_North_Atlantic (8)             | 102162.153 | 0.0010     | 0.1194 | 0.0010  | -1.4973  | 1.0000    | 0.6503 | 0.0010    | 0.7624 | 0.0010     | 0.5195 | 0.0010    | 0.6720 | 0.0010     | 0.7842 | 0.0010      |
| Brazil (11) v. Sri_Lanka (4)                       | 90297.515  | 0.0020     | 0.1126 | 0.0020  | -1.8575  | 1.0000    | 0.6491 | 0.0023    | 0.7552 | 0.0023     | 0.5243 | 0.0023    | 0.6743 | 0.0023     | 0.7864 | 0.0023      |
| Japan (11) v. Western_North_Atlantic (8)           | 120651.330 | 0.0010     | 0.1196 | 0.0010  | -1.1916  | 1.0000    | 0.6476 | 0.0010    | 0.7597 | 0.0010     | 0.5099 | 0.0010    | 0.6638 | 0.0010     | 0.7773 | 0.0010      |
| Gulf_of_Mexico (11) v. Mozambique (8)              | 119009.537 | 0.0010     | 0.1159 | 0.0010  | -1.0355  | 1.0000    | 0.6474 | 0.0010    | 0.7648 | 0.0010     | 0.4962 | 0.0010    | 0.6520 | 0.0010     | 0.7674 | 0.0010      |
| Caribbean_Sea (2) v. Indonesia (4)                 | 39028.741  | 0.0779     | 0.1119 | 0.0779  | -19.5630 | 1.0000    | 0.6471 | 0.1615    | 0.7609 | 0.1898     | 0.8856 | 0.2274    | 0.9300 | 0.2274     | 0.9629 | 0.2274      |
| Gulf_of_Mexico (11) v. Reunion (9)                 | 126641.833 | 0.0010     | 0.1167 | 0.0010  | -0.9377  | 1.0000    | 0.6467 | 0.0010    | 0.7573 | 0.0010     | 0.4936 | 0.0010    | 0.6504 | 0.0010     | 0.7659 | 0.0010      |
| Brazil (11) v. Fiji (8)                            | 118513.284 | 0.0010     | 0.1180 | 0.0010  | -1.2409  | 1.0000    | 0.6458 | 0.0010    | 0.7584 | 0.0010     | 0.4996 | 0.0010    | 0.6548 | 0.0010     | 0.7698 | 0.0010      |
| Gulf_of_Mexico (11) v. South_Africa (9)            | 126189.816 | 0.0010     | 0.1156 | 0.0010  | -0.8796  | 1.0000    | 0.6448 | 0.0010    | 0.7550 | 0.0010     | 0.4904 | 0.0010    | 0.6471 | 0.0010     | 0.7632 | 0.0010      |
| Arabian_Sea (6) v. Western_North_Atlantic (8)      | 88918.136  | 0.0010     | 0.1141 | 0.0010  | -1.4101  | 1.0000    | 0.6447 | 0.0010    | 0.7573 | 0.0010     | 0.5112 | 0.0010    | 0.6645 | 0.0010     | 0.7780 | 0.0010      |
| Caribbean_Sea (2) v. Sierra_Leone (1)              | 18745.883  | 0.3227     | 0.0679 | 0.3227  | NA       | NA        | 0.6446 | 0.3227    | 0.7406 | 0.3227     | NA     | NA        | NA     | NA         | NA     | NA          |
| Brazil (11) v. Japan (11)                          | 137727.301 | 0.0010     | 0.1183 | 0.0010  | -1.0138  | 1.0000    | 0.6435 | 0.0010    | 0.7541 | 0.0010     | 0.4928 | 0.0010    | 0.6488 | 0.0010     | 0.7647 | 0.0010      |
| Gulf_of_Mexico (11) v. Seychelles (10)             | 132727.138 | 0.0010     | 0.1168 | 0.0010  | -0.7989  | 1.0000    | 0.6419 | 0.0010    | 0.7543 | 0.0010     | 0.4868 | 0.0010    | 0.6449 | 0.0010     | 0.7612 | 0.0010      |
| Mozambique (8) v. Western_North_Atlantic (8)       | 100386.634 | 0.0010     | 0.1152 | 0.0010  | -1.1268  | 1.0000    | 0.6406 | 0.0010    | 0.7538 | 0.0010     | 0.5017 | 0.0010    | 0.6564 | 0.0010     | 0.7712 | 0.0010      |
| Arabian_Sea (6) v. Brazil (11)                     | 104258.428 | 0.0030     | 0.1126 | 0.0030  | -1.1959  | 1.0000    | 0.6403 | 0.0030    | 0.7529 | 0.0030     | 0.4915 | 0.0030    | 0.6473 | 0.0030     | 0.7635 | 0.0030      |
| Reunion (9) v. Western_North_Atlantic (8)          | 107588.086 | 0.0010     | 0.1161 | 0.0010  | -1.0175  | 1.0000    | 0.6400 | 0.0010    | 0.7536 | 0.0010     | 0.4985 | 0.0010    | 0.6542 | 0.0010     | 0.7692 | 0.0010      |
| South_Africa (9) v. Western_North_Atlantic (8)     | 107195.063 | 0.0010     | 0.1149 | 0.0010  | -0.9684  | 1.0000    | 0.6380 | 0.0010    | 0.7515 | 0.0010     | 0.4952 | 0.0010    | 0.6510 | 0.0010     | 0.7666 | 0.0010      |
| Caribbean_Sea (2) v. Papua_New_Guinea (2)          | 27164.723  | 0.3656     | 0.1045 | 0.3656  | NA       | NA        | 0.6374 | 0.3656    | 0.7505 | 0.3656     | NA     | NA        | NA     | NA         | NA     | NA          |
| Brazil (11) v. Mozambique (8)                      | 116483.030 | 0.0010     | 0.1139 | 0.0010  | -0.9406  | 1.0000    | 0.6370 | 0.0010    | 0.7556 | 0.0010     | 0.4841 | 0.0010    | 0.6408 | 0.0010     | 0.7580 | 0.0010      |
| Brazil (11) v. Reunion (9)                         | 124081.652 | 0.0010     | 0.1148 | 0.0010  | -0.8638  | 1.0000    | 0.6367 | 0.0010    | 0.7485 | 0.0010     | 0.4822 | 0.0010    | 0.6397 | 0.0010     | 0.7569 | 0.0010      |
| Seychelles (10) v. Western_North_Atlantic (8)      | 113326.862 | 0.0010     | 0.1161 | 0.0010  | -0.8798  | 1.0000    | 0.6350 | 0.0010    | 0.7495 | 0.0010     | 0.4911 | 0.0010    | 0.6482 | 0.0010     | 0.7641 | 0.0010      |
| Brazil (11) v. South_Africa (9)                    | 123642.988 | 0.0010     | 0.1137 | 0.0010  | -0.8041  | 1.0000    | 0.6348 | 0.0010    | 0.7461 | 0.0010     | 0.4788 | 0.0010    | 0.6363 | 0.0010     | 0.7541 | 0.0010      |
| Brazil (11) v. Seychelles (10)                     | 130161.195 | 0.0010     | 0.1149 | 0.0010  | -0.7239  | 1.0000    | 0.6322 | 0.0010    | 0.7456 | 0.0010     | 0.4754 | 0.0010    | 0.6341 | 0.0010     | 0.7520 | 0.0010      |
| Caribbean_Sea (2) v. Japan (11)                    | 76592.764  | 0.0100     | 0.1129 | 0.0100  | -2.8319  | 1.0000    | 0.6276 | 0.0450    | 0.7462 | 0.0465     | 0.6239 | 0.0529    | 0.7528 | 0.0529     | 0.8478 | 0.0529      |
| Caribbean_Sea (2) v. Thailand (4)                  | 38513.630  | 0.0749     | 0.1072 | 0.0749  | -10.0183 | 1.0000    | 0.6272 | 0.1638    | 0.7437 | 0.1638     | 0.8095 | 0.1638    | 0.8810 | 0.1638     | 0.9342 | 0.1638      |
| Caribbean_Sea (2) v. Fiji (8)                      | 60456.741  | 0.0290     | 0.1127 | 0.0290  | -3.6470  | 1.0000    | 0.6238 | 0.2071    | 0.7489 | 0.2071     | 0.6573 | 0.2071    | 0.7774 | 0.2071     | 0.8657 | 0.2071      |
| Australia (34) v. Gulf_of_Mexico (11)              | 266279.436 | 0.0010     | 0.1163 | 0.0010  | -0.2294  | 1.0000    | 0.6203 | 0.0010    | 0.7371 | 0.0010     | 0.4736 | 0.0010    | 0.6329 | 0.0010     | 0.7509 | 0.0010      |
| Caribbean_Sea (2) v. Sri_Lanka (4)                 | 38450.471  | 0.0719     | 0.1072 | 0.0719  | -8.2881  | 1.0000    | 0.6193 | 0.1319    | 0.7368 | 0.1319     | 0.7833 | 0.1319    | 0.8640 | 0.1319     | 0.9237 | 0.1319      |
| Australia (34) v. Western_North_Atlantic (8)       | 242136.802 | 0.0010     | 0.1157 | 0.0010  | -0.2818  | 1.0000    | 0.6158 | 0.0010    | 0.7332 | 0.0010     | 0.4751 | 0.0010    | 0.6340 | 0.0010     | 0.7518 | 0.0010      |
| Australia (34) v. Brazil (11)                      | 262424.982 | 0.0010     | 0.1144 | 0.0010  | -0.1938  | 1.0000    | 0.6134 | 0.0010    | 0.7302 | 0.0010     | 0.4632 | 0.0010    | 0.6228 | 0.0010     | 0.7422 | 0.0010      |
| Caribbean_Sea (2) v. Reunion (9)                   | 65164.107  | 0.0160     | 0.1093 | 0.0160  | -2.4310  | 1.0000    | 0.6119 | 0.0645    | 0.7340 | 0.0684     | 0.6031 | 0.0684    | 0.7370 | 0.0684     | 0.8359 | 0.0684      |
| Caribbean_Sea (2) v. Mozambique (8)                | 59068.619  | 0.0260     | 0.1086 | 0.0260  | -2.7066  | 1.0000    | 0.6098 | 0.3171    | 0.7470 | 0.3171     | 0.6169 | 0.3171    | 0.7469 | 0.3171     | 0.8435 | 0.3171      |
| Arabian_Sea (6) v. Caribbean_Sea (2)               | 49216.891  | 0.0559     | 0.1075 | 0.0559  | -3.6443  | 1.0000    | 0.6094 | 0.1842    | 0.7275 | 0.1842     | 0.6560 | 0.2036    | 0.7760 | 0.2036     | 0.8647 | 0.2036      |
| Caribbean_Sea (2) v. South_Africa (9)              | 64987.779  | 0.0170     | 0.1082 | 0.0170  | -2.2823  | 1.0000    | 0.6094 | 0.0592    | 0.7309 | 0.0592     | 0.5952 | 0.0632    | 0.7306 | 0.0632     | 0.8311 | 0.0632      |
| Caribbean_Sea (2) v. Seychelles (10)               | 70039.173  | 0.0110     | 0.1096 | 0.0110  | -2.0491  | 1.0000    | 0.6071 | 0.0466    | 0.7311 | 0.0466     | 0.5816 | 0.0514    | 0.7208 | 0.0514     | 0.8235 | 0.0514      |
| Australia (34) v. Caribbean_Sea (2)                | 184513.747 | 0.0010     | 0.1092 | 0.0010  | -0.8685  | 1.0000    | 0.6017 | 0.0050    | 0.7207 | 0.0050     | 0.5161 | 0.0052    | 0.6683 | 0.0052     | 0.7812 | 0.0052      |
| Papua_New_Guinea (2) v. Sierra_Leone (1)           | 6416.767   | 0.3227     | 0.0042 | 0.3227  | NA       | NA        | 0.0929 | 0.3227    | 0.1126 | 0.3227     | NA     | NA        | NA     | NA         | NA     | NA          |
| Indonesia (4) v. Japan (11)                        | 11178.826  | 0.0010     | 0.0025 | 0.0010  | -3.8365  | 0.9918    | 0.0750 | 0.0010    | 0.0897 | 0.0010     | 0.1905 | 0.0041    | 0.2406 | 0.0041     | 0.3621 | 0.0041      |
| Fiji (8) v. Indonesia (4)                          | 10448.990  | 0.0020     | 0.0029 | 0.0020  | -4.2258  | 1.0000    | 0.0732 | 0.0020    | 0.0875 | 0.0020     | 0.2201 | 0.0022    | 0.2747 | 0.0021     | 0.4055 | 0.0021      |
| Fiji (8) v. Japan (11)                             | 13523.753  | 0.0010     | 0.0024 | 0.0010  | -2.7437  | 1.0000    | 0.0679 | 0.0010    | 0.0814 | 0.0010     | 0.1088 | 0.0010    | 0.1440 | 0.0010     | 0.2279 | 0.0010      |

Table 5: Pairwise Fst for 16989 DArTseq loci between the all sites (continued)

|                                                 | Chi2      | Chi2.p.val | D      | D.p.val | Fis     | Fis.p.val | Fst    | Fst.p.val | F'st   | F'st.p.val | Gst    | Gst.p.val | G'st   | G'st.p.val | G''st  | G''st.p.val |
|-------------------------------------------------|-----------|------------|--------|---------|---------|-----------|--------|-----------|--------|------------|--------|-----------|--------|------------|--------|-------------|
| Indonesia (4) v. Papua_New_Guinea (2)           | 6781.410  | 0.2028     | 0.0023 | 0.2028  | NA      | NA        | 0.0480 | 0.0972    | 0.0573 | 0.0972     | NA     | NA        | NA     | NA         | NA     | NA          |
| Indonesia (4) v. Thailand (4)                   | 7570.074  | 0.0320     | 0.0019 | 0.0320  | -6.8647 | 1.0000    | 0.0461 | 0.0331    | 0.0552 | 0.0331     | 0.3524 | 0.0342    | 0.4141 | 0.0342     | 0.5668 | 0.0342      |
| Japan (11) v. Thailand (4)                      | 9733.776  | 0.0030     | 0.0018 | 0.0120  | -3.5281 | 0.8671    | 0.0440 | 0.0111    | 0.0526 | 0.0111     | 0.1636 | 0.0184    | 0.2091 | 0.0153     | 0.3203 | 0.0164      |
| Indonesia (4) v. Sri_Lanka (4)                  | 7684.223  | 0.0240     | 0.0019 | 0.1029  | -6.2934 | 1.0000    | 0.0437 | 0.0247    | 0.0525 | 0.0247     | 0.3330 | 0.0254    | 0.3951 | 0.0254     | 0.5462 | 0.0254      |
| Indonesia (4) v. Reunion (9)                    | 9002.416  | 0.0020     | 0.0018 | 0.0020  | -3.6602 | 1.0000    | 0.0421 | 0.0020    | 0.0507 | 0.0021     | 0.1785 | 0.0021    | 0.2266 | 0.0021     | 0.3437 | 0.0021      |
| Japan (11) v. Reunion (9)                       | 11453.845 | 0.0010     | 0.0015 | 0.0010  | -2.5427 | 1.0000    | 0.0405 | 0.0010    | 0.0487 | 0.0010     | 0.0847 | 0.0010    | 0.1133 | 0.0010     | 0.1826 | 0.0010      |
| Indonesia (4) v. Seychelles (10)                | 9067.995  | 0.0030     | 0.0018 | 0.0030  | -3.4077 | 1.0000    | 0.0404 | 0.0030    | 0.0489 | 0.0030     | 0.1642 | 0.0030    | 0.2102 | 0.0030     | 0.3215 | 0.0030      |
| Japan (11) v. Sri_Lanka (4)                     | 9650.543  | 0.0010     | 0.0016 | 0.0220  | -3.4005 | 0.6767    | 0.0403 | 0.0112    | 0.0482 | 0.0112     | 0.1570 | 0.0300    | 0.2018 | 0.0248     | 0.3101 | 0.0248      |
| Japan (11) v. Papua_New_Guinea (2)              | 8561.875  | 0.0330     | 0.0021 | 0.1568  | -6.5902 | 0.8100    | 0.0403 | 0.0538    | 0.0481 | 0.0538     | 0.3820 | 0.3300    | 0.4454 | 0.3300     | 0.5987 | 0.3300      |
| Japan (11) v. Seychelles (10)                   | 11592.099 | 0.0010     | 0.0015 | 0.0010  | -2.4653 | 1.0000    | 0.0389 | 0.0010    | 0.0468 | 0.0010     | 0.0786 | 0.0010    | 0.1057 | 0.0010     | 0.1708 | 0.0010      |
| Indonesia (4) v. South_Africa (9)               | 8789.531  | 0.0050     | 0.0017 | 0.0050  | -3.6000 | 1.0000    | 0.0381 | 0.0050    | 0.0459 | 0.0050     | 0.1744 | 0.0050    | 0.2217 | 0.0050     | 0.3373 | 0.0050      |
| Fiji (8) v. Reunion (9)                         | 10665.486 | 0.0010     | 0.0015 | 0.0010  | -2.6226 | 1.0000    | 0.0379 | 0.0010    | 0.0457 | 0.0010     | 0.0980 | 0.0010    | 0.1303 | 0.0010     | 0.2080 | 0.0010      |
| Arabian_Sea (6) v. Japan (11)                   | 10309.704 | 0.0010     | 0.0015 | 0.0050  | -2.8363 | 0.8881    | 0.0376 | 0.0040    | 0.0452 | 0.0040     | 0.1087 | 0.0080    | 0.1436 | 0.0060     | 0.2276 | 0.0060      |
| Fiji (8) v. Thailand (4)                        | 8865.162  | 0.0050     | 0.0018 | 0.0050  | -3.8772 | 1.0000    | 0.0374 | 0.0051    | 0.0448 | 0.0051     | 0.1897 | 0.0052    | 0.2396 | 0.0052     | 0.3608 | 0.0052      |
| Fiji (8) v. Seychelles (10)                     | 10839.719 | 0.0010     | 0.0016 | 0.0010  | -2.5154 | 1.0000    | 0.0372 | 0.0010    | 0.0450 | 0.0010     | 0.0911 | 0.0010    | 0.1219 | 0.0010     | 0.1952 | 0.0010      |
| Japan (11) v. Mozambique (8)                    | 10712.336 | 0.0010     | 0.0014 | 0.0010  | -2.6315 | 0.9960    | 0.0361 | 0.0010    | 0.0439 | 0.0010     | 0.0903 | 0.0010    | 0.1203 | 0.0010     | 0.1932 | 0.0010      |
| Fiji (8) v. Sri_Lanka (4)                       | 9100.450  | 0.0010     | 0.0018 | 0.0010  | -3.6561 | 0.9713    | 0.0359 | 0.0010    | 0.0431 | 0.0010     | 0.1808 | 0.0010    | 0.2301 | 0.0010     | 0.3480 | 0.0010      |
| Fiji (8) v. Mozambique (8)                      | 10160.898 | 0.0010     | 0.0015 | 0.0010  | -2.7350 | 1.0000    | 0.0358 | 0.0010    | 0.0437 | 0.0010     | 0.1063 | 0.0010    | 0.1407 | 0.0010     | 0.2232 | 0.0010      |
| Arabian_Sea (6) v. Indonesia (4)                | 8113.920  | 0.0050     | 0.0018 | 0.0090  | -4.4368 | 1.0000    | 0.0358 | 0.0051    | 0.0431 | 0.0051     | 0.2269 | 0.0052    | 0.2815 | 0.0052     | 0.4144 | 0.0052      |
| Indonesia (4) v. Mozambique (8)                 | 8461.219  | 0.0030     | 0.0017 | 0.0030  | -3.8955 | 1.0000    | 0.0352 | 0.0030    | 0.0432 | 0.0033     | 0.1914 | 0.0033    | 0.2412 | 0.0033     | 0.3631 | 0.0033      |
| Japan (11) v. South_Africa (9)                  | 10864.284 | 0.0010     | 0.0014 | 0.0010  | -2.5325 | 0.9980    | 0.0351 | 0.0010    | 0.0421 | 0.0010     | 0.0816 | 0.0010    | 0.1092 | 0.0010     | 0.1764 | 0.0010      |
| Fiji (8) v. Papua_New_Guinea (2)                | 8199.940  | 0.0340     | 0.0024 | 0.0340  | -8.0103 | 1.0000    | 0.0347 | 0.1288    | 0.0416 | 0.1288     | 0.4471 | 0.4416    | 0.5107 | 0.4416     | 0.6619 | 0.4416      |
| Fiji (8) v. South_Africa (9)                    | 10212.562 | 0.0010     | 0.0014 | 0.0010  | -2.6095 | 1.0000    | 0.0338 | 0.0010    | 0.0407 | 0.0010     | 0.0955 | 0.0010    | 0.1271 | 0.0010     | 0.2033 | 0.0010      |
| Arabian_Sea (6) v. Fiji (8)                     | 9533.093  | 0.0010     | 0.0015 | 0.0010  | -3.0109 | 1.0000    | 0.0332 | 0.0010    | 0.0403 | 0.0010     | 0.1263 | 0.0010    | 0.1655 | 0.0010     | 0.2591 | 0.0010      |
| Australia (34) v. Indonesia (4)                 | 10470.950 | 0.0010     | 0.0015 | 0.0010  | -2.3894 | 1.0000    | 0.0329 | 0.0010    | 0.0396 | 0.0010     | 0.1031 | 0.0010    | 0.1361 | 0.0010     | 0.2169 | 0.0010      |
| Australia (34) v. Fiji (8)                      | 13038.738 | 0.0010     | 0.0013 | 0.0010  | -1.9589 | 1.0000    | 0.0327 | 0.0010    | 0.0395 | 0.0010     | 0.0566 | 0.0010    | 0.0771 | 0.0010     | 0.1265 | 0.0010      |
| Australia (34) v. Japan (11)                    | 13998.770 | 0.0010     | 0.0012 | 0.0010  | -1.9736 | 1.0000    | 0.0319 | 0.0010    | 0.0384 | 0.0010     | 0.0471 | 0.0010    | 0.0644 | 0.0010     | 0.1065 | 0.0010      |
| Reunion (9) v. Thailand (4)                     | 7436.247  | 0.0989     | 0.0011 | 0.0869  | -3.3835 | 0.9254    | 0.0082 | 0.0935    | 0.0099 | 0.0935     | 0.1514 | 0.0867    | 0.1944 | 0.0887     | 0.3003 | 0.0887      |
| Reunion (9) v. Seychelles (10)                  | 8193.729  | 0.0020     | 0.0007 | 0.0080  | -2.3873 | 0.9960    | 0.0081 | 0.0060    | 0.0098 | 0.0060     | 0.0682 | 0.0060    | 0.0922 | 0.0060     | 0.1502 | 0.0060      |
| Australia (34) v. Reunion (9)                   | 9163.755  | 0.0010     | 0.0005 | 0.0010  | -1.9225 | 0.9990    | 0.0075 | 0.0010    | 0.0090 | 0.0010     | 0.0389 | 0.0010    | 0.0534 | 0.0010     | 0.0888 | 0.0010      |
| Reunion (9) v. Sri_Lanka (4)                    | 7667.716  | 0.0969     | 0.0011 | 0.1089  | -3.1964 | 0.6727    | 0.0072 | 0.1330    | 0.0087 | 0.1340     | 0.1439 | 0.1692    | 0.1860 | 0.1601     | 0.2884 | 0.1672      |
| Mozambique (8) v. Reunion (9)                   | 8036.435  | 0.0040     | 0.0008 | 0.0020  | -2.5285 | 0.9880    | 0.0072 | 0.0050    | 0.0087 | 0.0050     | 0.0809 | 0.0040    | 0.1083 | 0.0040     | 0.1750 | 0.0040      |
| Brazil (11) v. Western_North_Atlantic (8)       | 5969.634  | 0.0010     | 0.0003 | 0.0010  | -5.7343 | 1.0000    | 0.0069 | 0.0010    | 0.0079 | 0.0010     | 0.1470 | 0.0010    | 0.1769 | 0.0010     | 0.2824 | 0.0010      |
| Reunion (9) v. South_Africa (9)                 | 7939.288  | 0.0170     | 0.0007 | 0.0080  | -2.4433 | 0.9930    | 0.0065 | 0.0110    | 0.0079 | 0.0110     | 0.0724 | 0.0110    | 0.0974 | 0.0110     | 0.1584 | 0.0110      |
| Seychelles (10) v. Thailand (4)                 | 7243.604  | 0.1888     | 0.0010 | 0.1059  | -3.2235 | 0.9239    | 0.0059 | 0.1131    | 0.0071 | 0.1131     | 0.1400 | 0.0891    | 0.1810 | 0.0911     | 0.2816 | 0.0891      |
| Seychelles (10) v. South_Africa (9)             | 7830.997  | 0.0150     | 0.0006 | 0.0060  | -2.3823 | 0.9910    | 0.0054 | 0.0090    | 0.0065 | 0.0090     | 0.0667 | 0.0080    | 0.0902 | 0.0080     | 0.1471 | 0.0080      |
| Arabian_Sea (6) v. Reunion (9)                  | 7743.722  | 0.0699     | 0.0008 | 0.1429  | -2.7339 | 0.6593    | 0.0049 | 0.1948    | 0.0060 | 0.1948     | 0.0981 | 0.2168    | 0.1301 | 0.2098     | 0.2078 | 0.2118      |
| Caribbean_Sea (2) v. Western_North_Atlantic (8) | 4466.898  | 0.2947     | 0.0009 | 0.0460  | 28.5591 | 1.0000    | 0.0043 | 0.4340    | 0.0050 | 1.0000     | 1.5682 | 1.0000    | 1.4871 | 1.0000     | 1.1897 | 1.0000      |
| Brazil (11) v. Gulf_of_Mexico (11)              | 6086.428  | 0.0010     | 0.0002 | 0.0170  | -5.1049 | 0.9960    | 0.0041 | 0.0050    | 0.0047 | 0.0050     | 0.1126 | 0.0050    | 0.1373 | 0.0050     | 0.2246 | 0.0050      |
| Papua_New_Guinea (2) v. Reunion (9)             | 7257.257  | 0.1179     | 0.0017 | 0.4466  | -5.9832 | 0.2185    | 0.0039 | 0.4290    | 0.0047 | 0.4408     | 0.3588 | 0.6975    | 0.4221 | 0.5798     | 0.5747 | 0.5798      |
| Australia (34) v. Seychelles (10)               | 8496.485  | 0.0010     | 0.0004 | 0.0020  | -1.8963 | 0.7323    | 0.0035 | 0.0060    | 0.0043 | 0.0060     | 0.0336 | 0.0050    | 0.0463 | 0.0050     | 0.0773 | 0.0050      |
| South_Africa (9) v. Sri_Lanka (4)               | 7270.440  | 0.0220     | 0.0010 | 0.0460  | -3.1960 | 0.5207    | 0.0034 | 0.0535    | 0.0041 | 0.0535     | 0.1420 | 0.1312    | 0.1837 | 0.1140     | 0.2852 | 0.1241      |
| Mozambique (8) v. Seychelles (10)               | 7676.401  | 0.1708     | 0.0006 | 0.1039  | -2.4553 | 0.7952    | 0.0033 | 0.1898    | 0.0040 | 0.1918     | 0.0733 | 0.1279    | 0.0986 | 0.1319     | 0.1601 | 0.1299      |
| Seychelles (10) v. Sri_Lanka (4)                | 7383.298  | 0.1638     | 0.0010 | 0.2408  | -3.0516 | 0.6100    | 0.0031 | 0.2910    | 0.0038 | 0.2910     | 0.1322 | 0.3281    | 0.1721 | 0.3320     | 0.2688 | 0.3320      |
| Papua_New_Guinea (2) v. Thailand (4)            | 6091.084  | 0.1299     | 0.0017 | 0.4565  | NA      | NA        | 0.0024 | 0.2379    | 0.0029 | 0.3265     | NA     | NA        | NA     | NA         | NA     | NA          |
| Australia (34) v. Mozambique (8)                | 8236.530  | 0.0010     | 0.0004 | 0.0180  | -1.9434 | 0.1419    | 0.0023 | 0.0020    | 0.0028 | 0.0020     | 0.0411 | 0.0020    | 0.0563 | 0.0020     | 0.0935 | 0.0020      |
| Sri_Lanka (4) v. Thailand (4)                   | 6497.360  | 0.1149     | 0.0011 | 0.2398  | -5.5253 | 0.7436    | 0.0022 | 0.2587    | 0.0027 | 0.2413     | 0.2885 | 0.2925    | 0.3478 | 0.2925     | 0.4938 | 0.2925      |
| Australia (34) v. South_Africa (9)              | 8263.583  | 0.0010     | 0.0004 | 0.0040  | -1.9207 | 0.6953    | 0.0022 | 0.0040    | 0.0027 | 0.0040     | 0.0361 | 0.0060    | 0.0497 | 0.0060     | 0.0828 | 0.0060      |
| Australia (34) v. Thailand (4)                  | 7765.556  | 0.1978     | 0.0008 | 0.1538  | -2.2952 | 1.0000    | 0.0020 | 0.1064    | 0.0024 | 0.1074     | 0.0832 | 0.0171    | 0.1108 | 0.0211     | 0.1791 | 0.0211      |
| Australia (34) v. Sri_Lanka (4)                 | 8208.993  | 0.0180     | 0.0008 | 0.1698  | -2.1999 | 0.1518    | 0.0019 | 0.1052    | 0.0023 | 0.1052     | 0.0797 | 0.3578    | 0.1068 | 0.2905     | 0.1727 | 0.3146      |
| Arabian_Sea (6) v. Seychelles (10)              | 7435.985  | 0.3037     | 0.0007 | 0.4146  | -2.6269 | 0.4625    | 0.0018 | 0.3686    | 0.0022 | 0.3686     | 0.0894 | 0.3746    | 0.1193 | 0.3736     | 0.1915 | 0.3736      |
| Mozambique (8) v. South_Africa (9)              | 7504.197  | 0.0529     | 0.0007 | 0.0140  | -2.5352 | 0.8931    | 0.0017 | 0.0709    | 0.0021 | 0.0719     | 0.0784 | 0.0410    | 0.1049 | 0.0410     | 0.1700 | 0.0410      |
| South_Africa (9) v. Thailand (4)                | 7002.891  | 0.3307     | 0.0009 | 0.1758  | -3.3554 | 0.9898    | 0.0017 | 0.2444    | 0.0020 | 0.2444     | 0.1472 | 0.0530    | 0.1892 | 0.0591     | 0.2933 | 0.0591      |

Table 5: Pairwise Fst for 16989 DArTseq loci between the all sites (continued)

|                                                   | Chi2      | Chi2.p.val | D      | D.p.val | Fis       | Fis.p.val | Fst     | Fst.p.val | F'st    | F'st.p.val | Gst    | Gst.p.val | G'st   | G'st.p.val | G''st  | G''st.p.val |
|---------------------------------------------------|-----------|------------|--------|---------|-----------|-----------|---------|-----------|---------|------------|--------|-----------|--------|------------|--------|-------------|
| Caribbean_Sea (2) v. Gulf_of_Mexico (11)          | 4659.761  | 0.5754     | 0.0008 | 0.2348  | 95.8315   | 1.0000    | 0.0011  | 1.0000    | 0.0013  | 1.0000     | 1.1312 | 1.0000    | 1.1146 | 1.0000     | 1.0538 | 1.0000      |
| Papua_New_Guinea (2) v. Sri_Lanka (4)             | 6164.749  | 0.3277     | 0.0017 | 0.8621  | -26.8706  | 0.3073    | 0.0007  | 0.4283    | 0.0008  | 0.3458     | 0.7616 | 1.0000    | 0.7981 | 1.0000     | 0.8854 | 1.0000      |
| Gulf_of_Mexico (11) v. Western_North_Atlantic (8) | 5176.118  | 0.4765     | 0.0002 | 0.3506  | -6.4515   | 0.6280    | 0.0003  | 0.4400    | 0.0003  | 0.4400     | 0.1584 | 0.4280    | 0.1888 | 0.4270     | 0.2997 | 0.4260      |
| Brazil (11) v. Caribbean_Sea (2)                  | 4866.404  | 0.7882     | 0.0009 | 0.2078  | -211.9907 | 1.0000    | 0.0002  | 1.0000    | 0.0003  | 1.0000     | 0.9505 | 1.0000    | 0.9564 | 1.0000     | 0.9777 | 1.0000      |
| Mozambique (8) v. Thailand (4)                    | 6935.491  | 0.5385     | 0.0009 | 0.5554  | -3.6041   | 0.6087    | 0.0002  | 0.4400    | 0.0003  | 0.4400     | 0.1636 | 0.7027    | 0.2084 | 0.7224     | 0.3197 | 0.7169      |
| Mozambique (8) v. Sri_Lanka (4)                   | 7159.624  | 0.2448     | 0.0010 | 0.3407  | -3.3991   | 0.1049    | 0.0002  | 0.4591    | 0.0003  | 0.4591     | 0.1557 | 0.8559    | 0.2000 | 0.8485     | 0.3078 | 0.8485      |
| Arabian_Sea (6) v. Australia (34)                 | 7994.027  | 0.0180     | 0.0005 | 0.1898  | -2.0228   | 0.0030    | 0.0002  | 0.4585    | 0.0002  | 0.4585     | 0.0515 | 0.7403    | 0.0703 | 0.6853     | 0.1158 | 0.7153      |
| Papua_New_Guinea (2) v. Seychelles (10)           | 7000.832  | 0.3327     | 0.0016 | 0.6054  | -5.3888   | 0.2640    | 0.0001  | 0.4757    | 0.0001  | 0.6190     | 0.3286 | 0.8080    | 0.3913 | 0.8080     | 0.5418 | 0.8080      |
| Papua_New_Guinea (2) v. South_Africa (9)          | 6953.554  | 0.1668     | 0.0016 | 0.7572  | -5.8186   | 0.1702    | -0.0004 | 0.6738    | -0.0005 | 0.6935     | 0.3509 | 1.0000    | 0.4139 | 1.0000     | 0.5661 | 1.0000      |
| Arabian_Sea (6) v. South_Africa (9)               | 7177.547  | 0.6054     | 0.0007 | 0.3876  | -2.7254   | 0.0450    | -0.0008 | 0.7333    | -0.0010 | 0.7333     | 0.0950 | 0.8052    | 0.1261 | 0.7922     | 0.2019 | 0.7982      |
| Arabian_Sea (6) v. Sri_Lanka (4)                  | 6876.948  | 0.3447     | 0.0011 | 0.1269  | -3.8635   | 0.4256    | -0.0009 | 0.6264    | -0.0011 | 0.6264     | 0.1880 | 0.6730    | 0.2380 | 0.6730     | 0.3586 | 0.6730      |
| Arabian_Sea (6) v. Thailand (4)                   | 6678.836  | 0.6434     | 0.0010 | 0.4326  | -4.0768   | 0.9396    | -0.0011 | 0.6703    | -0.0013 | 0.6703     | 0.1961 | 0.3857    | 0.2464 | 0.4179     | 0.3700 | 0.4068      |
| Arabian_Sea (6) v. Mozambique (8)                 | 7148.821  | 0.8262     | 0.0007 | 0.7922  | -2.8570   | 0.0160    | -0.0022 | 0.9451    | -0.0028 | 0.9461     | 0.1051 | 0.9820    | 0.1387 | 0.9780     | 0.2206 | 0.9790      |
| Australia (34) v. Papua_New_Guinea (2)            | 7672.289  | 0.4126     | 0.0015 | 0.9291  | -3.1099   | 0.0230    | -0.0036 | 0.8812    | -0.0043 | 0.8812     | 0.1955 | 1.0000    | 0.2463 | 1.0000     | 0.3695 | 1.0000      |
| Mozambique (8) v. Papua_New_Guinea (2)            | 6753.842  | 0.7932     | 0.0016 | 1.0000  | -6.7316   | 0.6102    | -0.0077 | 1.0000    | -0.0094 | 1.0000     | 0.3916 | 1.0000    | 0.4548 | 1.0000     | 0.6082 | 1.0000      |
| Arabian_Sea (6) v. Papua_New_Guinea (2)           | 6374.787  | 0.8841     | 0.0016 | 1.0000  | -9.1102   | 0.3263    | -0.0081 | 1.0000    | -0.0098 | 1.0000     | 0.4828 | 1.0000    | 0.5444 | 1.0000     | 0.6928 | 1.0000      |
| Arabian_Sea (6) v. Sierra_Leone (1)               | 9707.152  | 0.1518     | 0.0051 | 0.1518  | NA        | NA        | NA      | NA        | NA      | NA         | NA     | NA        | NA     | NA         | NA     | NA          |
| Australia (34) v. Sierra_Leone (1)                | 24824.983 | 0.0340     | 0.0053 | 0.0340  | NA        | NA        | NA      | NA        | NA      | NA         | NA     | NA        | NA     | NA         | NA     | NA          |
| Brazil (11) v. Sierra_Leone (1)                   | 55309.051 | 0.0819     | 0.0714 | 0.0819  | NA        | NA        | NA      | NA        | NA      | NA         | NA     | NA        | NA     | NA         | NA     | NA          |
| Fiji (8) v. Sierra_Leone (1)                      | 12245.299 | 0.1279     | 0.0061 | 0.1279  | NA        | NA        | NA      | NA        | NA      | NA         | NA     | NA        | NA     | NA         | NA     | NA          |
| Gulf_of_Mexico (11) v. Sierra_Leone (1)           | 58236.780 | 0.0789     | 0.0724 | 0.0789  | NA        | NA        | NA      | NA        | NA      | NA         | NA     | NA        | NA     | NA         | NA     | NA          |
| Indonesia (4) v. Sierra_Leone (1)                 | 9125.677  | 0.2088     | 0.0061 | 0.2088  | NA        | NA        | NA      | NA        | NA      | NA         | NA     | NA        | NA     | NA         | NA     | NA          |
| Japan (11) v. Sierra_Leone (1)                    | 14485.463 | 0.0839     | 0.0060 | 0.0839  | NA        | NA        | NA      | NA        | NA      | NA         | NA     | NA        | NA     | NA         | NA     | NA          |
| Mozambique (8) v. Sierra_Leone (1)                | 11045.550 | 0.1279     | 0.0051 | 0.1279  | NA        | NA        | NA      | NA        | NA      | NA         | NA     | NA        | NA     | NA         | NA     | NA          |
| Reunion (9) v. Sierra_Leone (1)                   | 12026.058 | 0.1059     | 0.0053 | 0.1059  | NA        | NA        | NA      | NA        | NA      | NA         | NA     | NA        | NA     | NA         | NA     | NA          |
| Seychelles (10) v. Sierra_Leone (1)               | 12316.464 | 0.0819     | 0.0053 | 0.0819  | NA        | NA        | NA      | NA        | NA      | NA         | NA     | NA        | NA     | NA         | NA     | NA          |
| Sierra_Leone (1) v. South_Africa (9)              | 11819.383 | 0.1129     | 0.0051 | 0.1129  | NA        | NA        | NA      | NA        | NA      | NA         | NA     | NA        | NA     | NA         | NA     | NA          |
| Sierra_Leone (1) v. Sri_Lanka (4)                 | 8331.470  | 0.2088     | 0.0050 | 0.2088  | NA        | NA        | NA      | NA        | NA      | NA         | NA     | NA        | NA     | NA         | NA     | NA          |
| Sierra_Leone (1) v. Thailand (4)                  | 8268.943  | 0.2218     | 0.0047 | 0.2218  | NA        | NA        | NA      | NA        | NA      | NA         | NA     | NA        | NA     | NA         | NA     | NA          |
| Sierra_Leone (1) v. Western_North_Atlantic (8)    | 46417.112 | 0.1239     | 0.0722 | 0.1239  | NA        | NA        | NA      | NA        | NA      | NA         | NA     | NA        | NA     | NA         | NA     | NA          |

## 5.8 PCA

```
pca1 <- adegenet::glPca(BS.dartseq.gl, nf = 5, parallel = TRUE,
                      n.cores = parallel::detectCores() - 1)
save(pca1, file = "DARtseq_ALL_PCA2.Rdata")

load("DARtseq_ALL_PCA2.Rdata")
load("DARtseq_ALL_objects3.Rdata")

pop.levels <- c("Brazil", "Caribbean Sea", "Gulf of Mexico", "Western North Atlantic",
               "Sierra Leone", "South Africa", "Mozambique", "Reunion",
               "Seychelles", "Arabian Sea", "Sri Lanka", "Thailand", "Indonesia",
               "Papua New Guinea", "Fitzroy River", "Daly River", "Adelaide River",
               "South Alligator River", "East Alligator River", "Blue mud Bay",
               "Roper River", "Town's River", "Wenlock River", "Trinity inlet", "Clarence River",
               "Sydney Harbour", "Okinawa", "Urauchi River", "Fiji")
BS.dartseq.gl$pop <- factor(BS.dartseq.gl$other$ind.metrics$Site2,
                           levels = pop.levels)

BS.pca.scores <- as.data.frame(pca1$scores)
BS.pca.scores$pop <- adegenet::pop(BS.dartseq.gl)
cols <- adegenet::funky(nPop(BS.dartseq.gl))

p <-
  ggplot2::ggplot(BS.pca.scores, ggplot2::aes(x = PC1, y = PC2, colour = pop)) +
  ggplot2::geom_point(size = 2) + ggplot2::scale_color_manual(values = cols) +
  ggplot2::geom_hline(yintercept = 0) + ggplot2::geom_vline(xintercept = 0) +
  ggplot2::theme_minimal() +
  ggplot2::theme(
    axis.text = ggplot2::element_text(size = 5),
    axis.title.x = ggplot2::element_text(size = 10),
    axis.title.y = ggplot2::element_text(size = 10),
    legend.text = ggplot2::element_text(size = 7)
  )
p
```

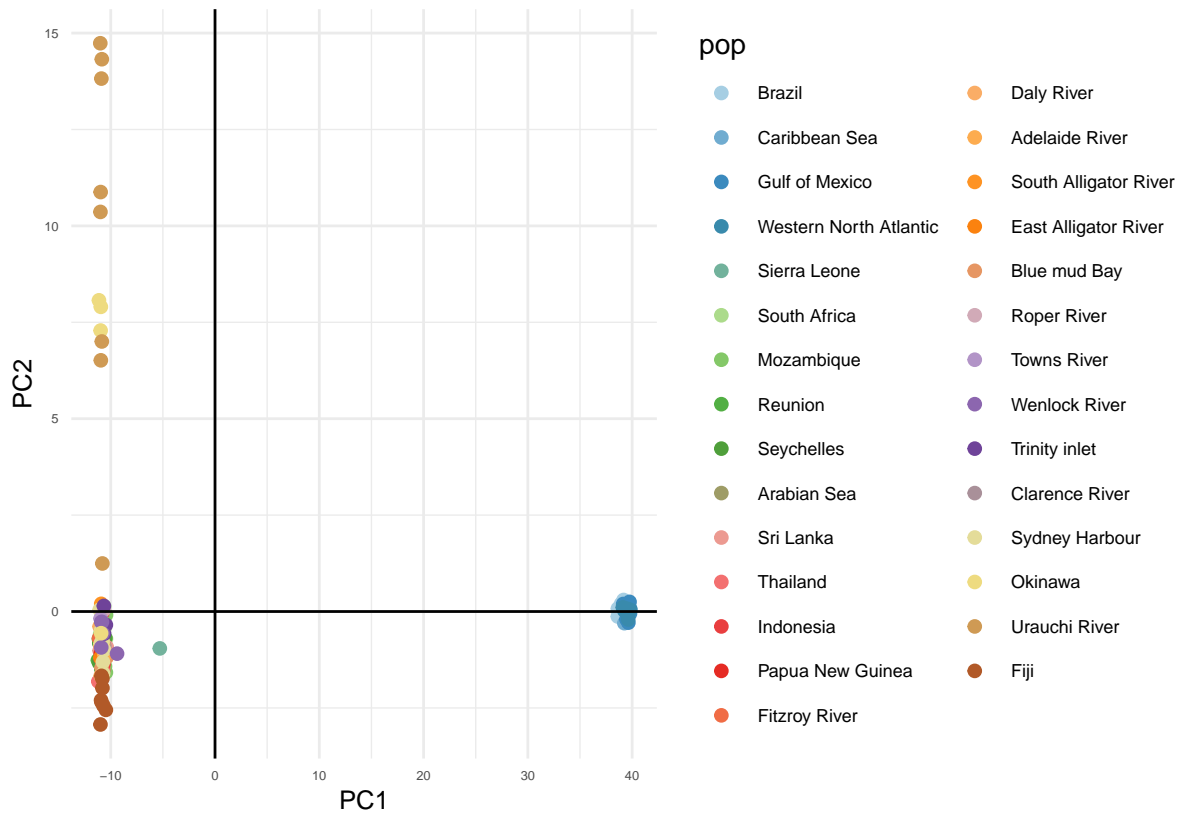

```
ggplot2::ggsave(p, filename = "DArTseq_ALL_PCA1.png", width = 30,
                height = 15, units = "cm")
```

```
p <-
ggplot2::ggplot(BS.pca.scores, ggplot2::aes(x = PC1, y = PC3, colour = pop)) +
ggplot2::geom_point(size = 2) + ggplot2::scale_color_manual(values = cols) +
ggplot2::geom_hline(yintercept = 0) + ggplot2::geom_vline(xintercept = 0) +
ggplot2::theme_minimal() +
ggplot2::theme(
  axis.text = ggplot2::element_text(size = 5),
  axis.title.x = ggplot2::element_text(size = 10),
  axis.title.y = ggplot2::element_text(size = 10),
  legend.text = ggplot2::element_text(size = 7)
)
p
```



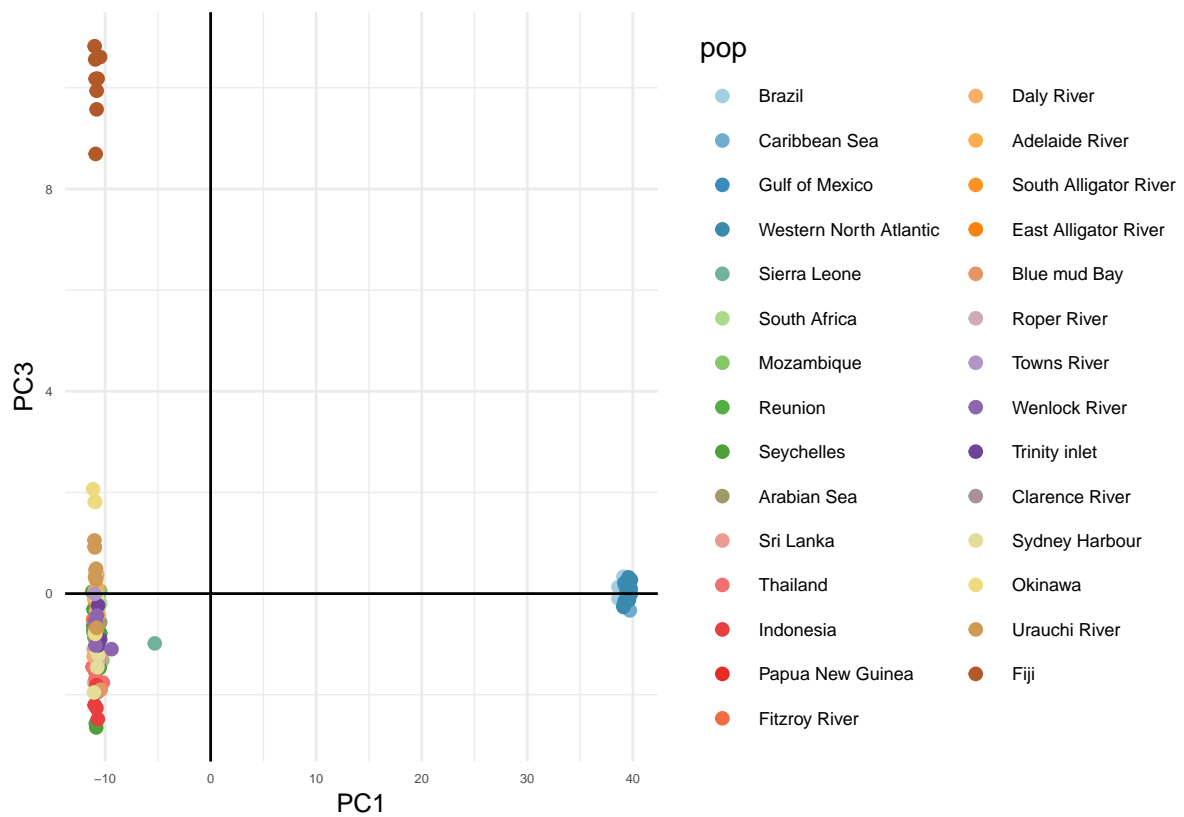

```
ggplot2::ggsave(p, filename = "DArTseq_ALL_PCA2.png", width = 30, height = 15,
  units = "cm")
```

```
p <-
ggplot2::ggplot(BS.pca.scores, ggplot2::aes(x = PC2, y = PC3, colour = pop)) +
ggplot2::geom_point(size = 2) + ggplot2::scale_color_manual(values = cols) +
ggplot2::geom_hline(yintercept = 0) + ggplot2::geom_vline(xintercept = 0) +
ggplot2::theme_minimal() +
ggplot2::theme(
  axis.text = ggplot2::element_text(size = 5),
  axis.title.x = ggplot2::element_text(size = 10),
  axis.title.y = ggplot2::element_text(size = 10),
  legend.text = ggplot2::element_text(size = 7)
)
p
```

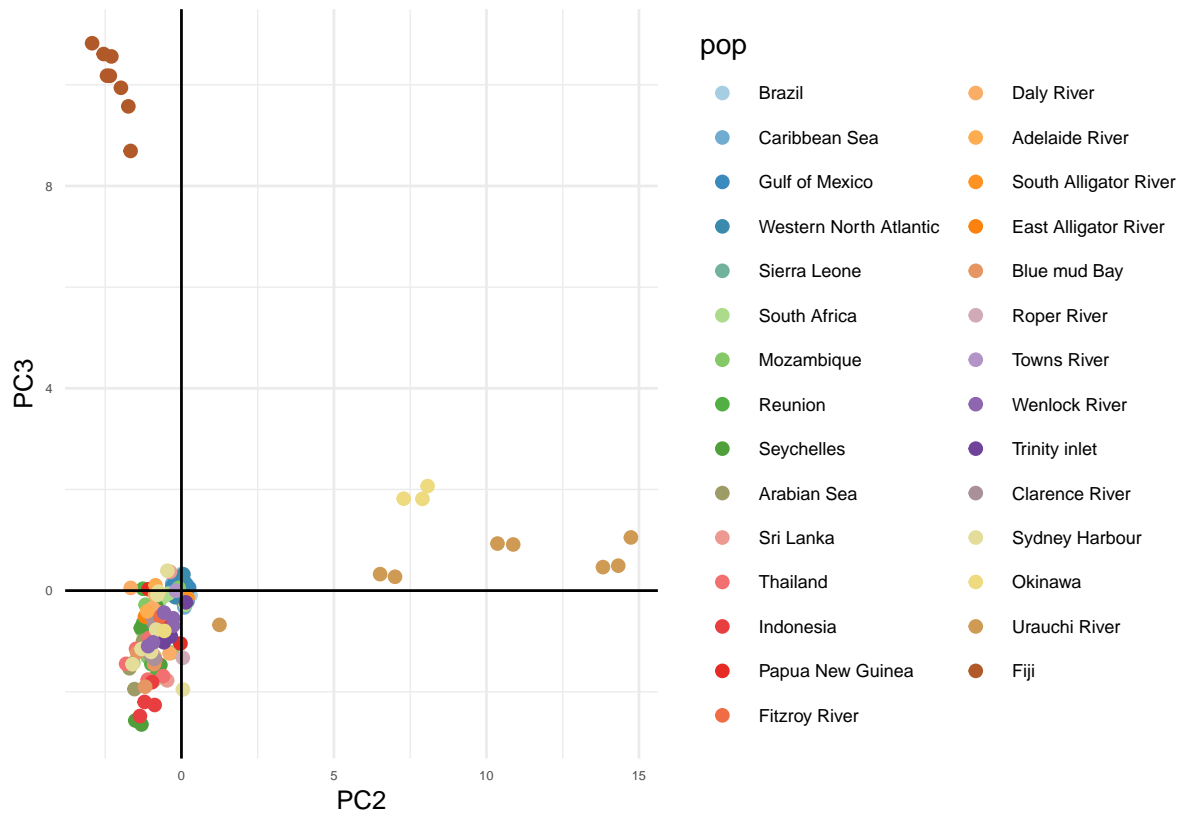

```
ggplot2::ggsave(p, filename = "DArTseq_ALL_PCA3.png", width = 30, height = 15,
  units = "cm")
```

```
p <-
ggplot2::ggplot(BS.pca.scores, ggplot2::aes(x = PC3, y = PC4, colour = pop)) +
ggplot2::geom_point(size = 2) + ggplot2::scale_color_manual(values = cols) +
ggplot2::geom_hline(yintercept = 0) + ggplot2::geom_vline(xintercept = 0) +
ggplot2::theme_minimal() +
ggplot2::theme(
  axis.text = ggplot2::element_text(size = 5),
  axis.title.x = ggplot2::element_text(size = 10),
  axis.title.y = ggplot2::element_text(size = 10),
  legend.text = ggplot2::element_text(size = 7)
)
p
```

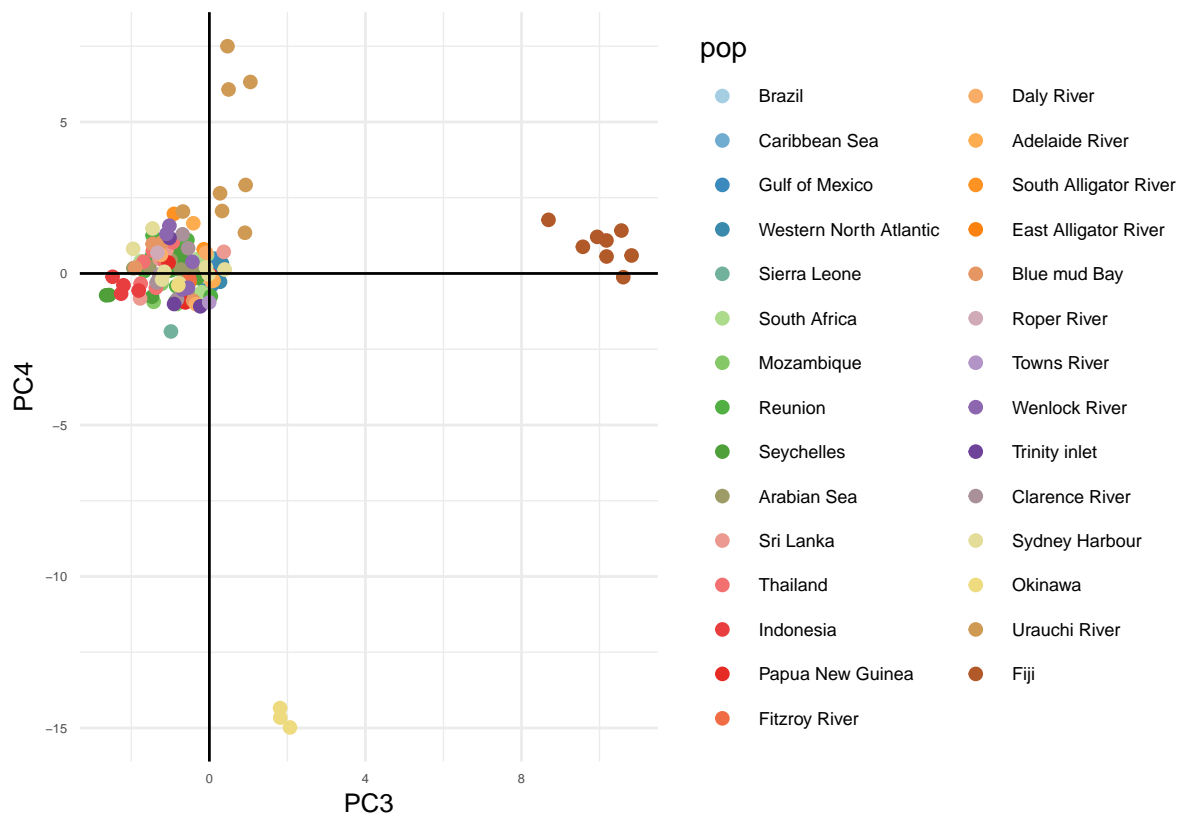

```
ggplot2::ggsave(p, filename = "DArTseq_ALL_PCA4.png", width = 30, height = 15,
  units = "cm")
```

```
p <-
ggplot2::ggplot(BS.pca.scores, ggplot2::aes(x = PC3, y = PC5, colour = pop)) +
ggplot2::geom_point(size = 2) + ggplot2::scale_color_manual(values = cols) +
ggplot2::geom_hline(yintercept = 0) + ggplot2::geom_vline(xintercept = 0) +
ggplot2::theme_minimal() +
ggplot2::theme(
  axis.text = ggplot2::element_text(size = 5),
  axis.title.x = ggplot2::element_text(size = 10),
  axis.title.y = ggplot2::element_text(size = 10),
  legend.text = ggplot2::element_text(size = 7)
)
p
```

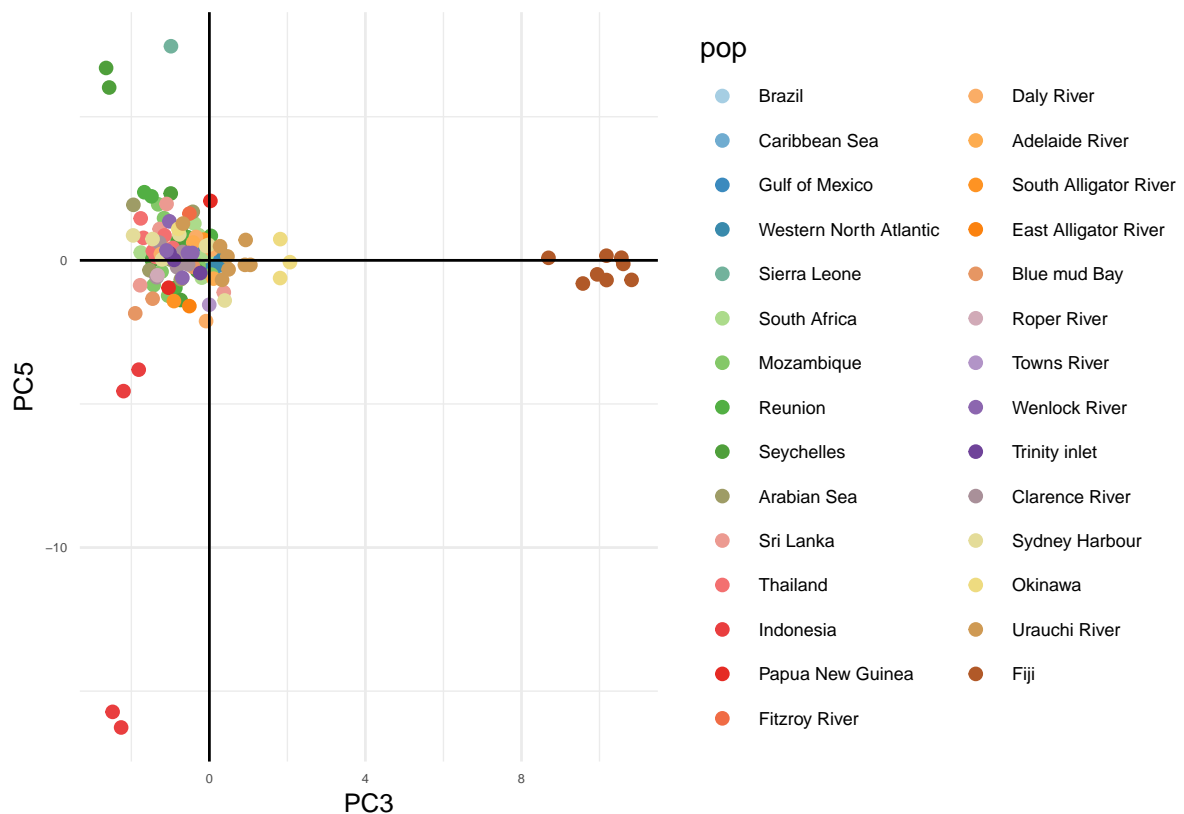

```
ggplot2::ggsave(p, filename = "DArTseq_ALL_PCA5.png", width = 30, height = 15,
  units = "cm")
```

## 5.9 DAPC

### 5.9.1 Optimal number of clusters with neutral markers

```
set.seed(124)
grp <-
  adegenet::find.clusters(
    BS.dartseq.gl,
    max.n.clust = 18,
    n.pca = adegenet::nInd(BS.dartseq.gl) / 3,
    stat = "BIC",
    parallel = TRUE,
    n.cores = parallel::detectCores() - 1
  )
```

```
save(grp, file = "DArTseq_ALL_grp_.Rdata")
```

```
load("DArTseq_ALL_grp_.Rdata")
```

```
y <- as.numeric(grp$Kstat)
x <- 1:18
data <- data.frame(x,y,stringsAsFactors = F)
plot <- ggplot2::ggplot(data, ggplot2::aes(x,y)) +
  ggplot2::geom_point(size = 5, shape = 1, color = "blue") +
  ggplot2::geom_line(size = 1,color = "blue") +
  ggplot2::scale_x_continuous(name = waiver(),
    breaks = seq(from = 0,
      to = nrow(BS.dartseq.gl) - 1, by = 1)) +
```

```

ggplot2::labs(subtitle = "",
              y = "Bayesian Information Criterion",
              x = "Number of clusters",
              title = "",
              caption = "") +
ggplot2::theme_classic() +
ggplot2::theme(
  axis.text = ggplot2::element_text(size = 5),
  axis.title.x = ggplot2::element_text(size = 20,vjust = 0, hjust = 0.5),
  axis.title.y = ggplot2::element_text(size = 20,vjust = 2, hjust = 0.5))
print(plot)

```

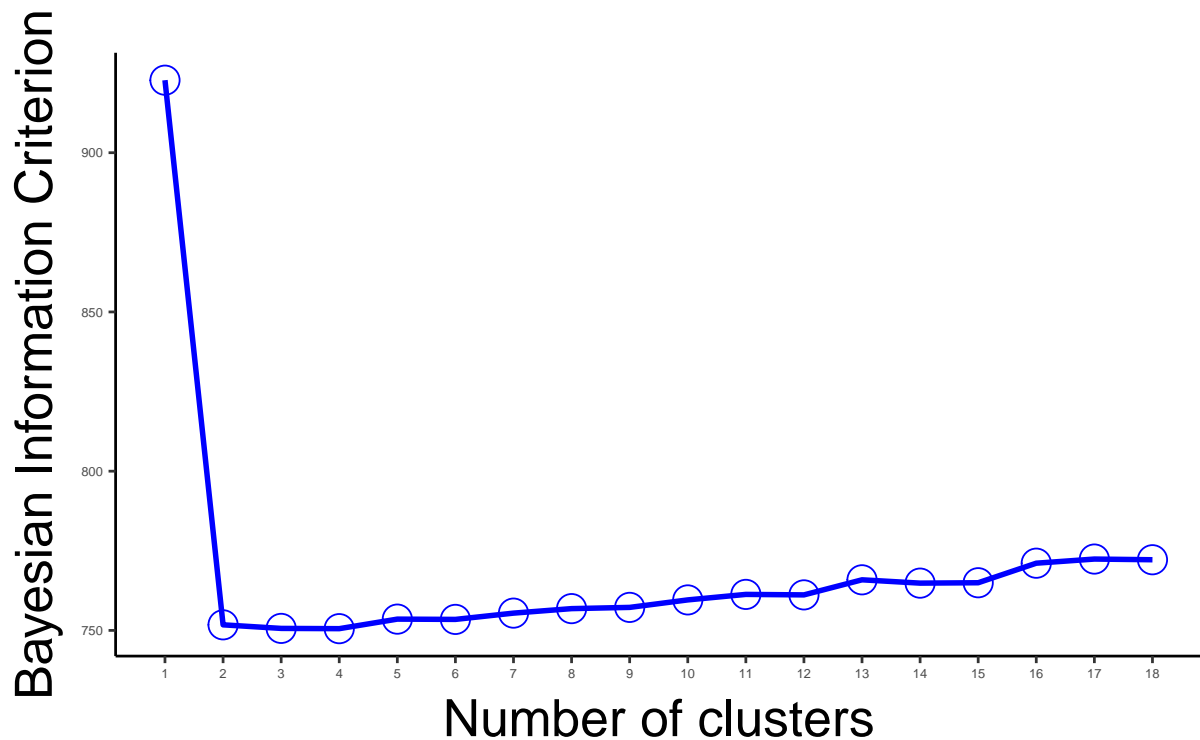

```

ggplot2::ggsave(plot, filename = "DArTseq_ALL_grp.png", width = 30, height = 15,
                units = "cm")

```

### 5.9.2 Cross-validation to identify the optimal number of PCs

Uses a training - holdout set of individuals to check how reliable individuals can be assigned.

```

set.seed(124)
x <- BS.dartseq.gl
x <- x[x$pop != "Sierra Leone",]
pop.levels <- c("Brazil","Caribbean Sea","Gulf of Mexico", "Western North Atlantic",
               "Sierra Leone", "South Africa", "Mozambique", "Reunion" , "Seychelles",
               "Arabian Sea", "Sri Lanka", "Thailand", "Indonesia", "Papua New Guinea",
               "Australia", "Japan", "Fiji")
x$pop <- factor(x$other$ind.metrics$Site, levels = pop.levels)
x <- x[x$pop != "Sierra Leone"] #only 1 sample

xval <-
  adegenet::xvalDapc(

```

```

tab(x, NA.method = "mean"),
adegenet::pop(x),
n.pca = seq(1, adegenet::nInd(x), by = 20),
training.set = 0.9,
result = "groupMean",
center = TRUE,
scale = FALSE,
n.rep = 1000,
parallel = "multicore",
ncpus = 1,
xval.plot = TRUE
)
print(xval[2:6])
PC <- as.numeric(xval$`Number of PCs Achieving Lowest MSE`)

#refine the analysis
set.seed(124)
png(file="DARtseq_ALL_xval.png")
xval <-
  adegenet::xvalDapc(
    tab(x, NA.method = "mean"),
    adegenet::pop(x),
    n.pca = (PC - 15):(PC + 15),
    n.rep = 1000,
    parallel = "multicore",
    ncpus = 1,
    xval.plot = TRUE
  )
dev.off()
save(xval, file = "DARtseq_ALL_xval.rdata")

load("DARtseq_ALL_xval.rdata")
print(xval[2:6])
PC <- as.numeric(xval$`Number of PCs Achieving Lowest MSE`)

## $`Median and Confidence Interval for Random Chance`
##      2.5%      50%      97.5%
## 0.03180112 0.06023563 0.10943031
##
## $`Mean Successful Assignment by Number of PCs of PCA`
##      6      7      8      9      10      11      12      13
## 0.3334479 0.3421860 0.3338213 0.3383668 0.3321606 0.3407525 0.3438592 0.3456094
##      14      15      16      17      18      19      20      21
## 0.3487801 0.3492491 0.3410468 0.3400176 0.3382993 0.3396637 0.3410831 0.3390233
##      22      23      24      25      26      27      28      29
## 0.3431461 0.3447303 0.3461724 0.3434242 0.3417871 0.3413665 0.3411261 0.3391184
##      30      31      32      33      34      35      36
## 0.3435539 0.3440634 0.3433089 0.3476013 0.3457444 0.3356826 0.3372854
##
## $`Number of PCs Achieving Highest Mean Success`
## [1] "15"
##
## $`Root Mean Squared Error by Number of PCs of PCA`
##      6      7      8      9      10      11      12      13
## 0.6675354 0.6591730 0.6674186 0.6629926 0.6691257 0.6606877 0.6575962 0.6558610
##      14      15      16      17      18      19      20      21
## 0.6527248 0.6521758 0.6603002 0.6613992 0.6631257 0.6618169 0.6602382 0.6624344
##      22      23      24      25      26      27      28      29

```

```
## 0.6582304 0.6566346 0.6554321 0.6580812 0.6597661 0.6600890 0.6603060 0.6625241
##      30      31      32      33      34      35      36
## 0.6581730 0.6575802 0.6584071 0.6542000 0.6559334 0.6660468 0.6644172
##
## $`Number of PCs Achieving Lowest MSE`
## [1] "15"
```

```
dapc.all.object.names <- c()
for (K in 2:10) {
  set.seed(124)
  grp <- adegenet::find.clusters(BS.dartseq.gl, n.clust = K, n.pca = PC)
  set.seed(124)
  dapc.all.neutral <- adegenet::dapc(BS.dartseq.gl, grp$grp, n.da = K - 1,
    n.pca = PC)
  assign(paste0("dapc.all.", K), value = dapc.all.neutral)
  dapc.all.object.names <- c(dapc.all.object.names,
    paste0("dapc.all.", K))
}
save(list = dapc.all.object.names, dapc.all.object.names,
  file = "DARtseq_ALL_DAPC2.Rdata")
```

### 5.9.3 DAPC barplot

Group individuals according to DAPC posterior membership.

```
load("DARtseq_ALL_DAPC2.Rdata")
for (K in 2:10) {
  colour <- colours.prior[1:K]
  dapc <- get(dapc.all.object.names[K - 1])
  post <- as.matrix(dapc$posterior)
  colnames(post) <- paste0("Group", 1:nlevels(dapc$grp))
  locations <- BS.dartseq.gl$pop

  plot.dapc.FDD(x = post,
    locations = locations,
    colour = colour,
    region.lwd = 1,
    plotTitle = paste0("DAPC: all Bull Sharks - subset Australia\n for K=",
      K, " & PC=", PC, sep = ""))

  dev.print(
    device = png,
    file = paste0("DARtseq_ALL_DAPC_barplot_K", K, ".png"),
    res = 300,
    width = 30,
    height = 15,
    units = "cm")
}
```

## DAPC: all Bull Sharks – subset Australia for K=2 & PC=15

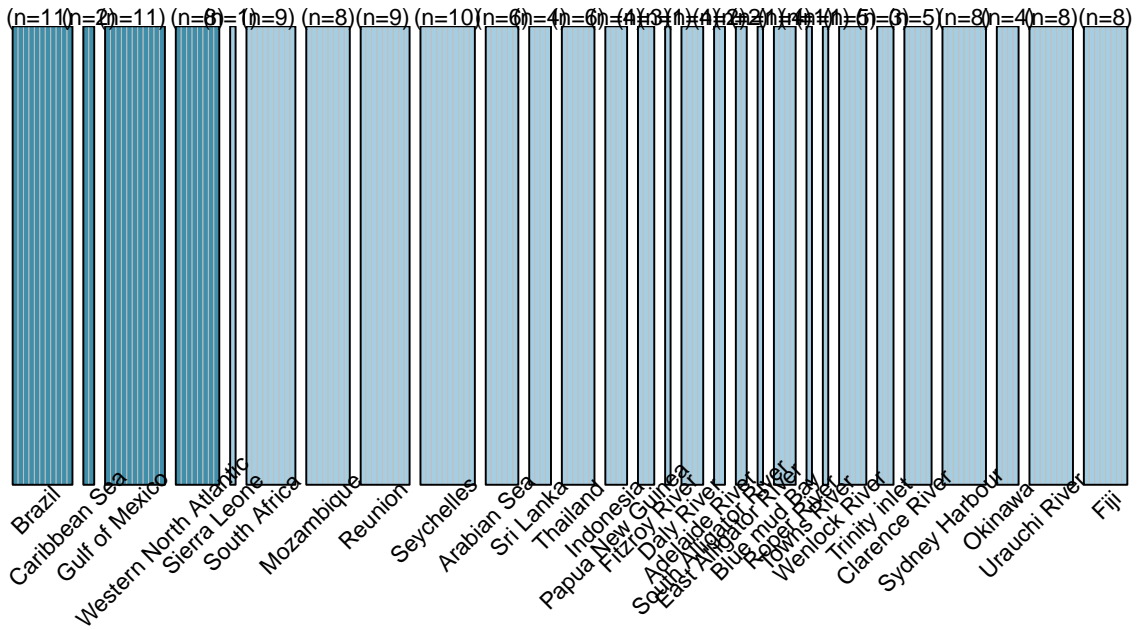

## DAPC: all Bull Sharks – subset Australia for K=3 & PC=15

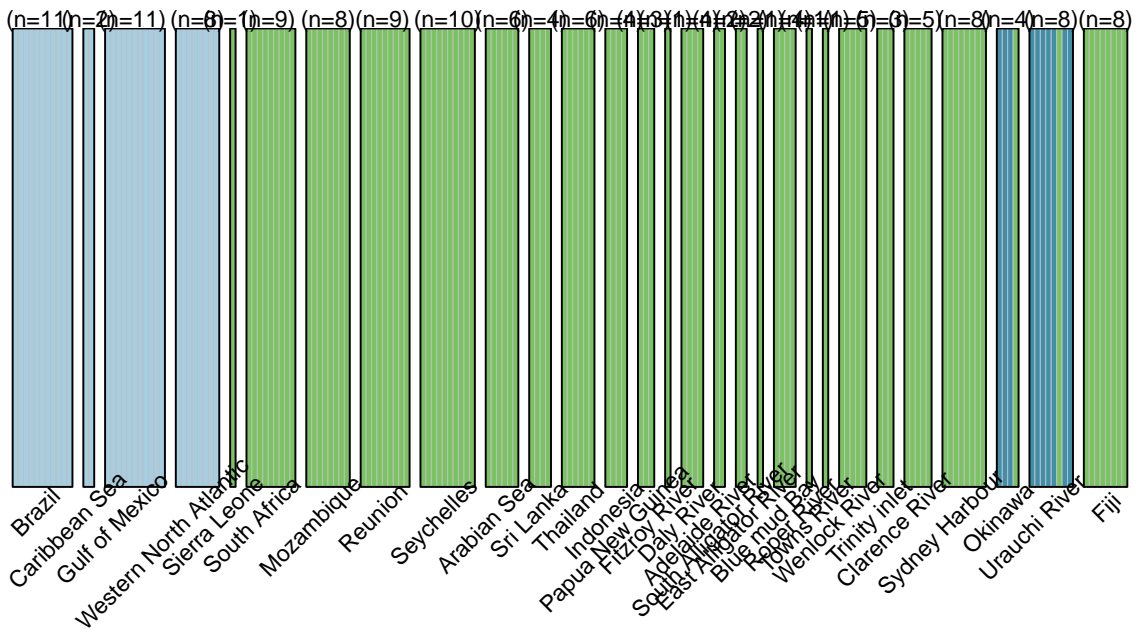



## DAPC: all Bull Sharks – subset Australia for K=4 & PC=15

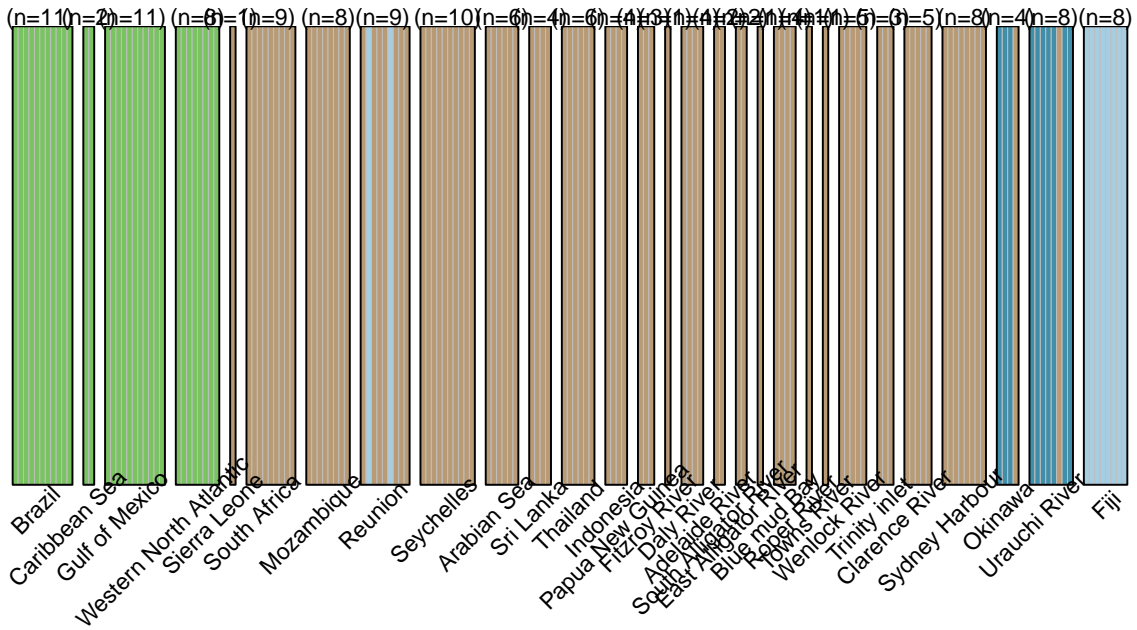

## DAPC: all Bull Sharks – subset Australia for K=5 & PC=15

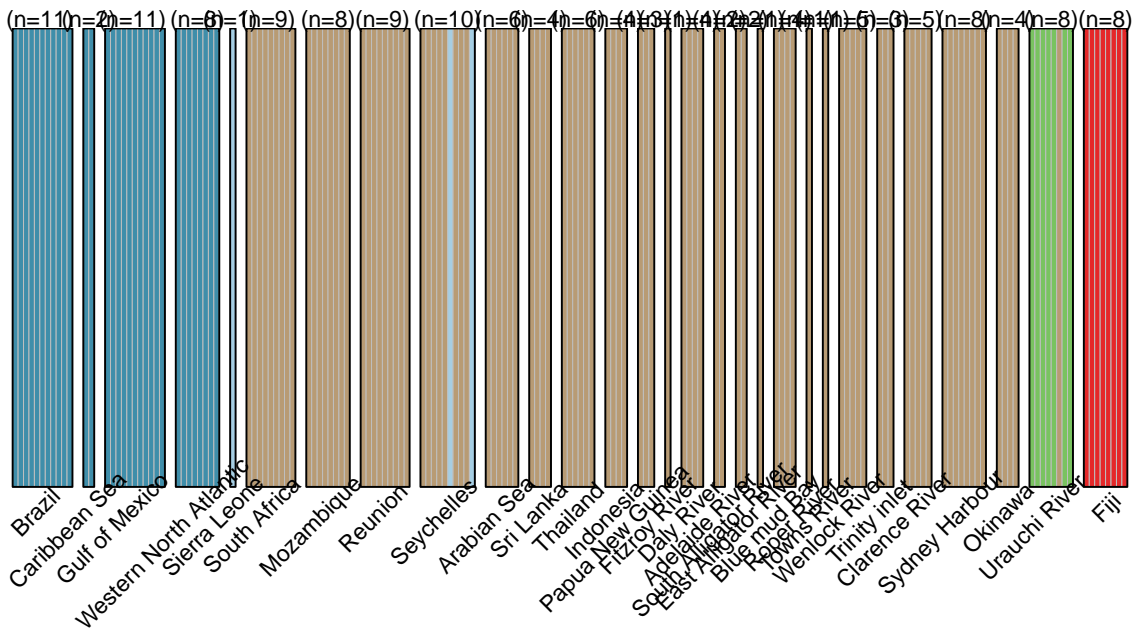

## DAPC: all Bull Sharks – subset Australia for K=6 & PC=15

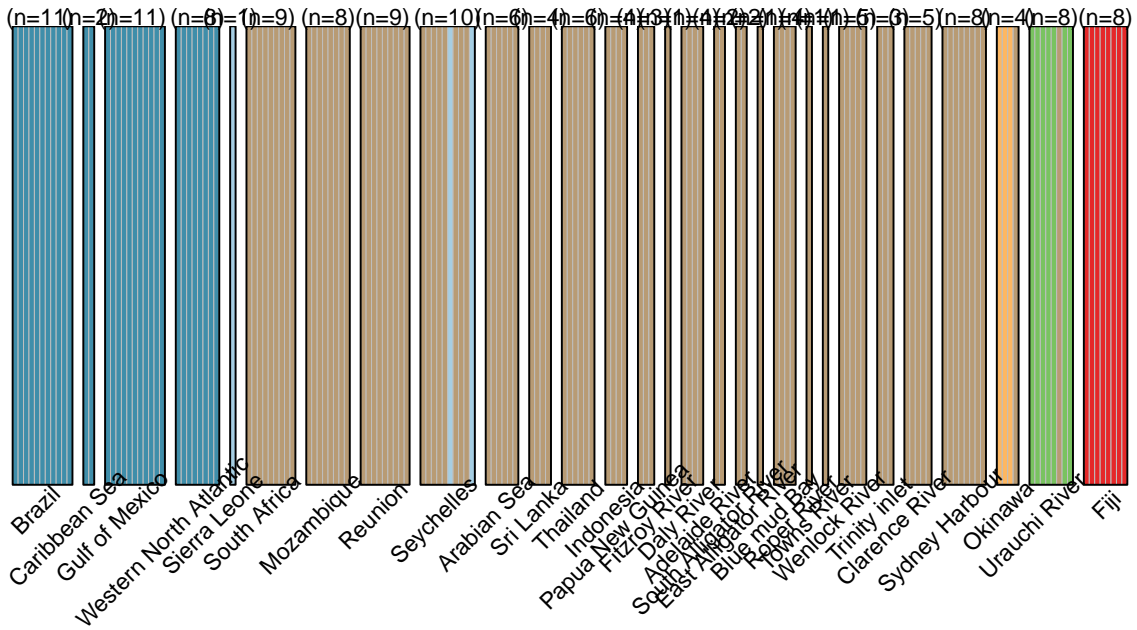

## DAPC: all Bull Sharks – subset Australia for K=7 & PC=15

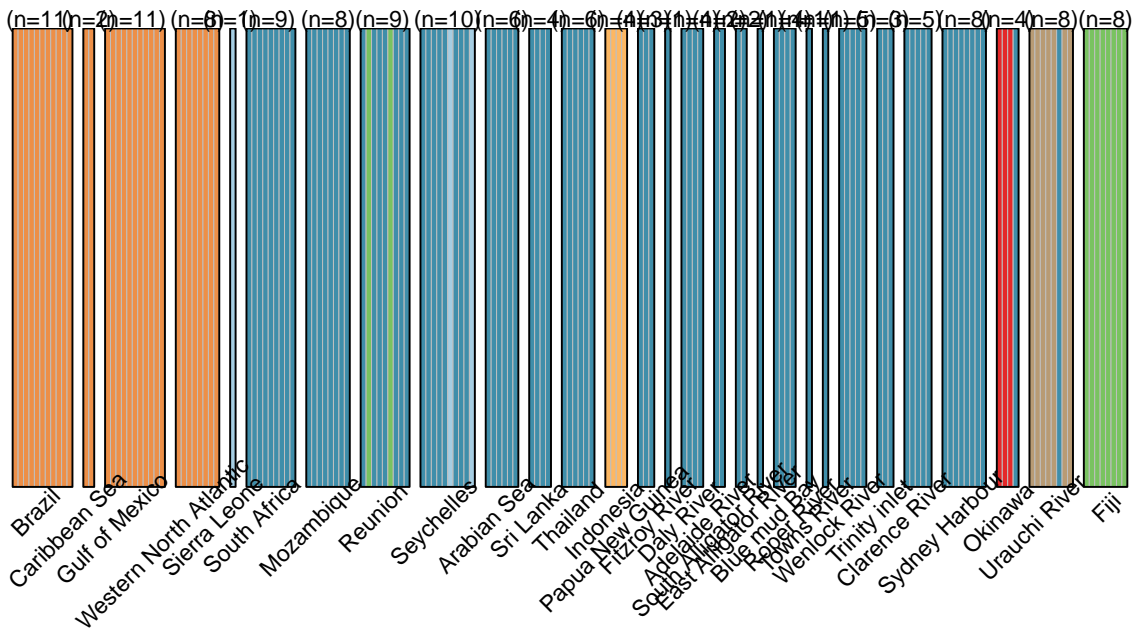

## DAPC: all Bull Sharks – subset Australia for K=8 & PC=15

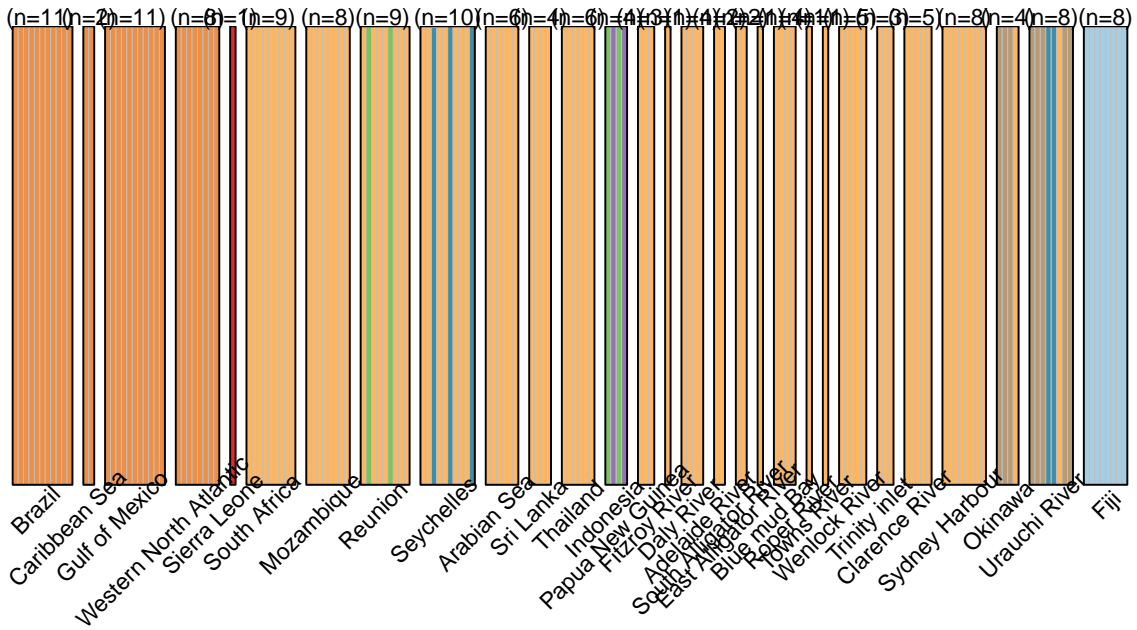

## DAPC: all Bull Sharks – subset Australia for K=9 & PC=15

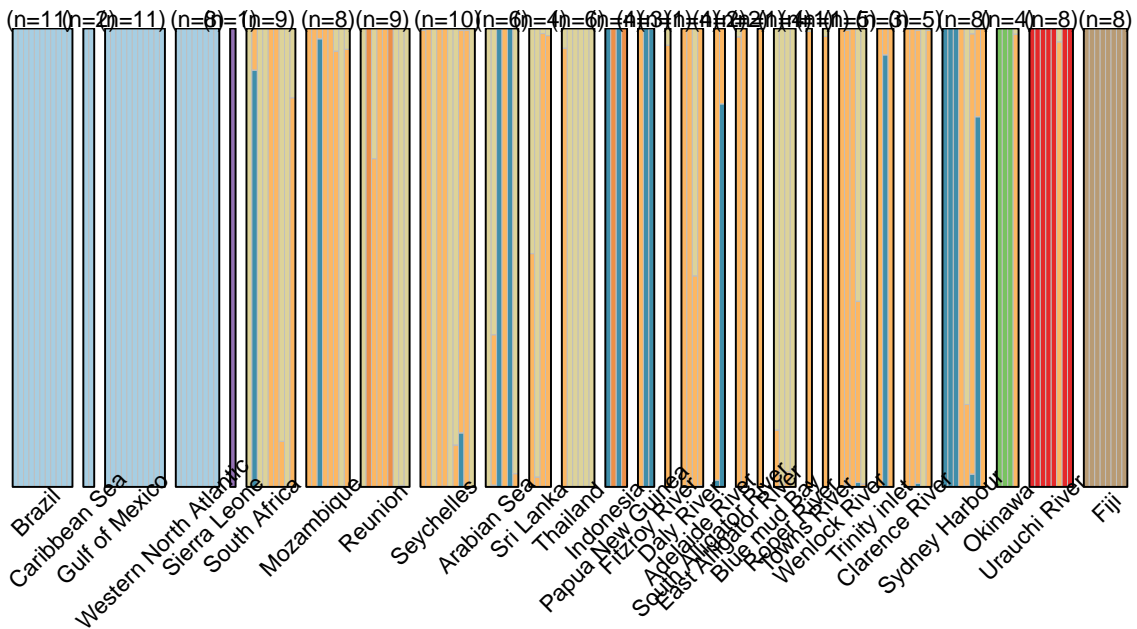

## DAPC: all Bull Sharks – subset Australia for K=10 & PC=15

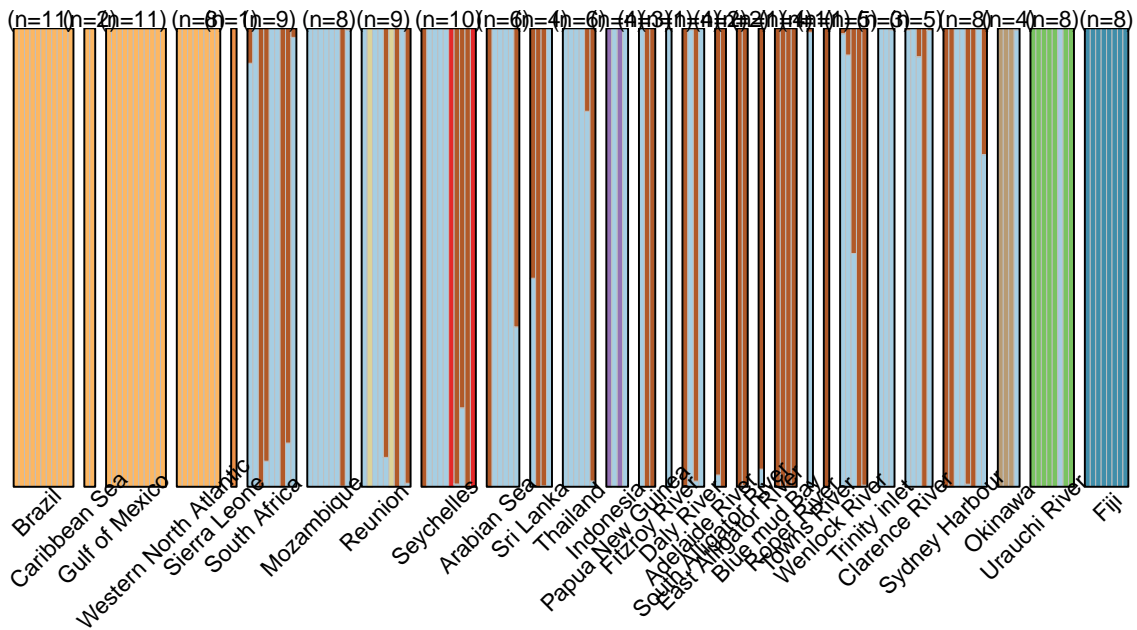

### 5.9.4 DAPC scatterplot

```
load("DARtseq_ALL_DAPC2.Rdata")

for (K in 3:10) {
  dapc <- get(dapc.all.object.names[K - 1])
  if (K == 2) {
    posi.leg <- "bottomright"
  } else {posi.leg <- "bottomleft"}
  dapc.plot <- ade4::scatter(dapc, grp = pop(BS.dartseq.gl), cex = 2,
                            legend = TRUE, col = colours.29, clabel = FALSE,
                            posi.leg = posi.leg, scree.pca = FALSE,
                            posi.pca = "topleft", cleg = 0.5, xax = 1,
                            yax = 2, inset.solid = 0.3)

  dev.print(
    device = png,
    file = paste0("DARtseq_ALL_DAPC_scatterplot_K", K, ".png"),
    width = 30,
    height = 15,
    units = "cm",
    res = 300
  )
}
```

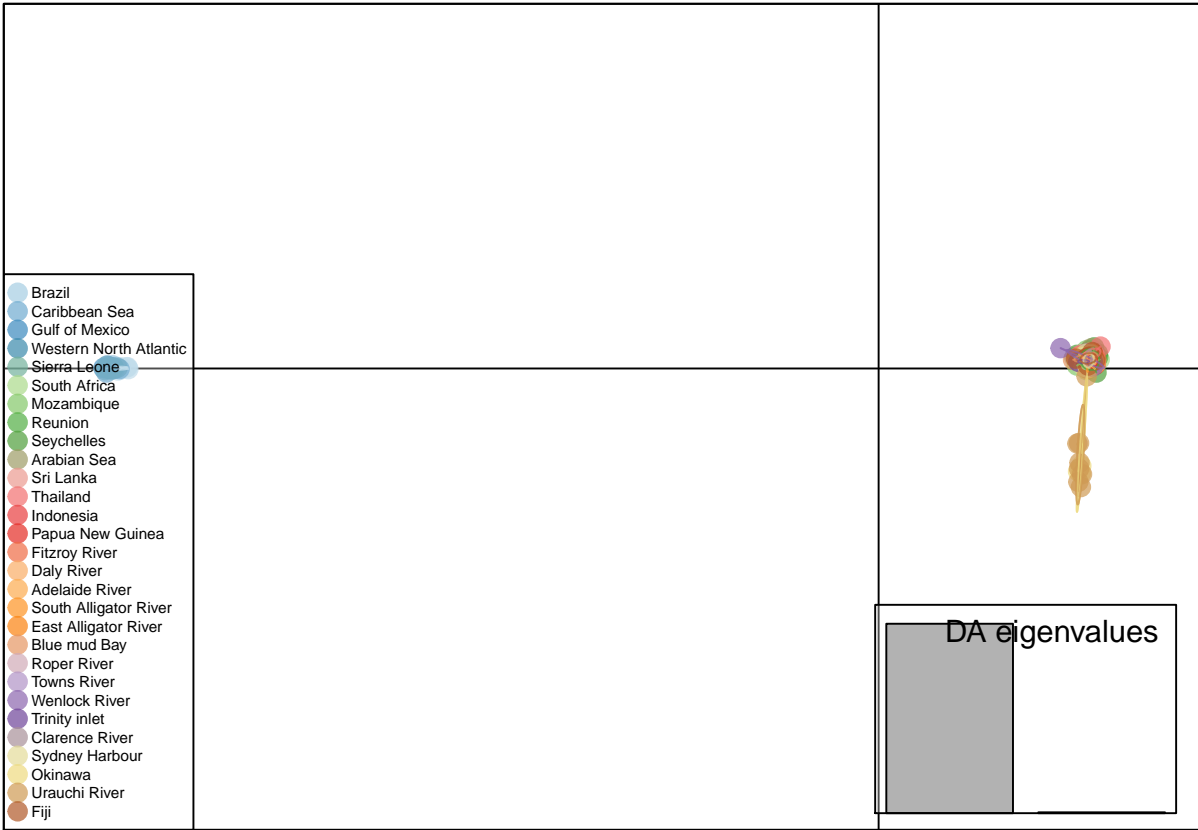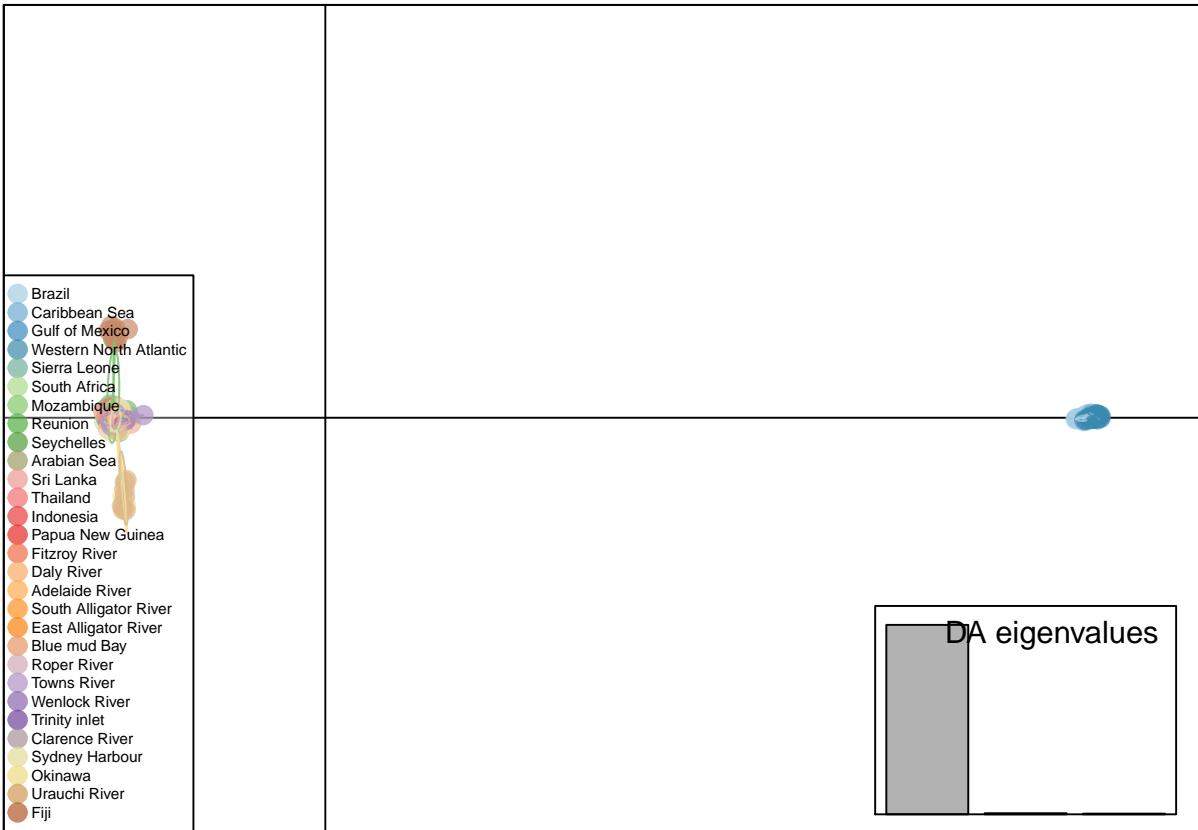

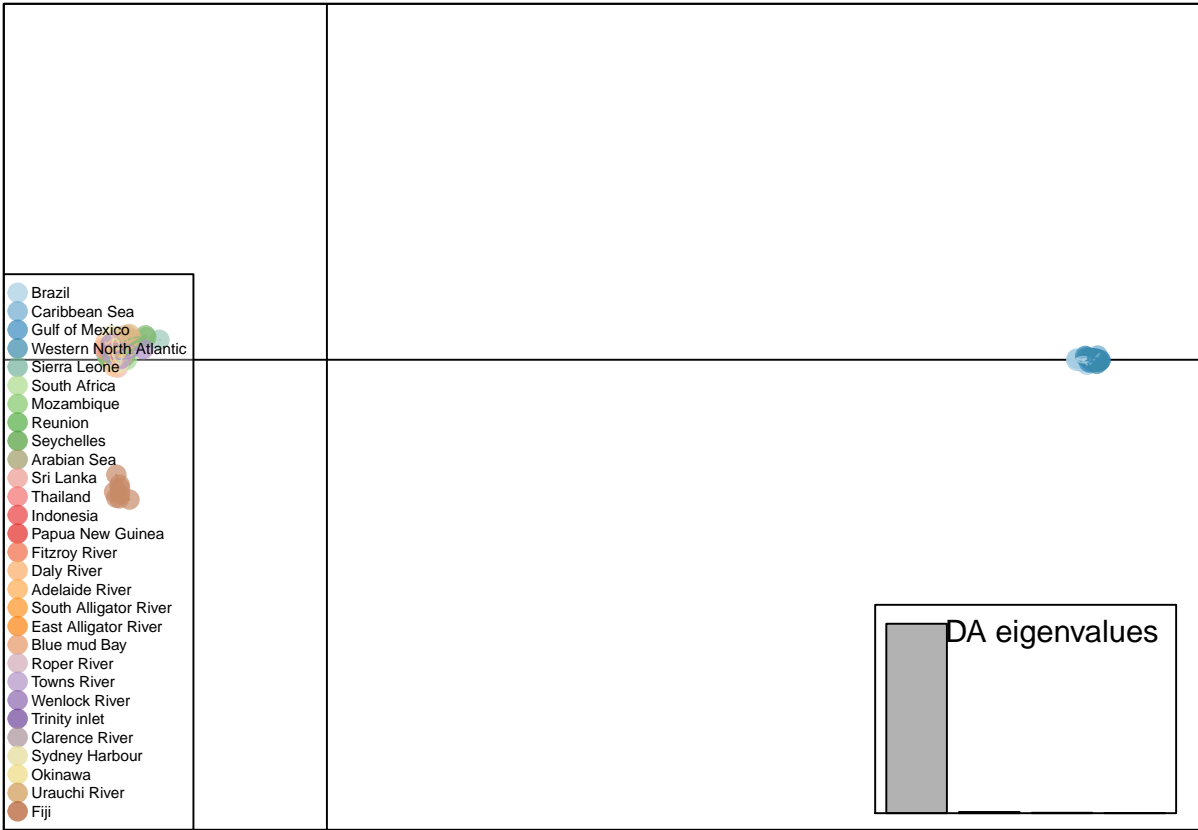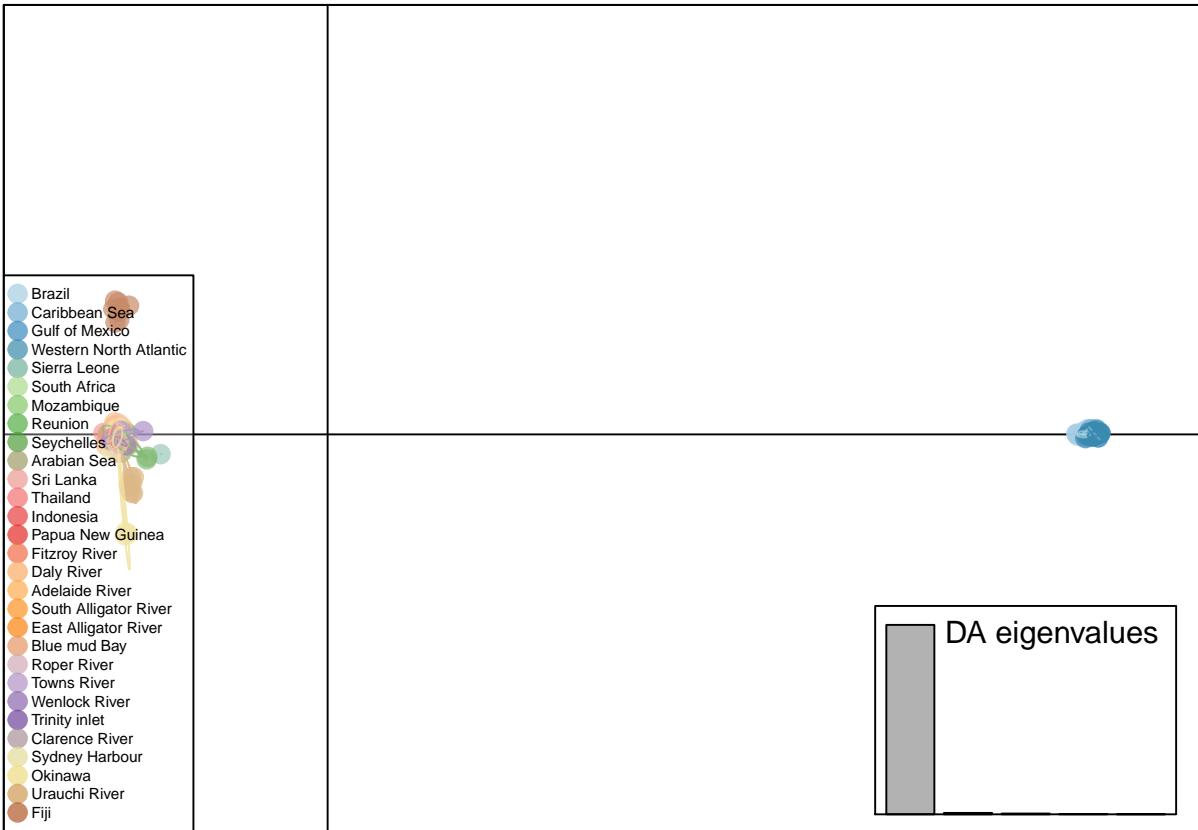

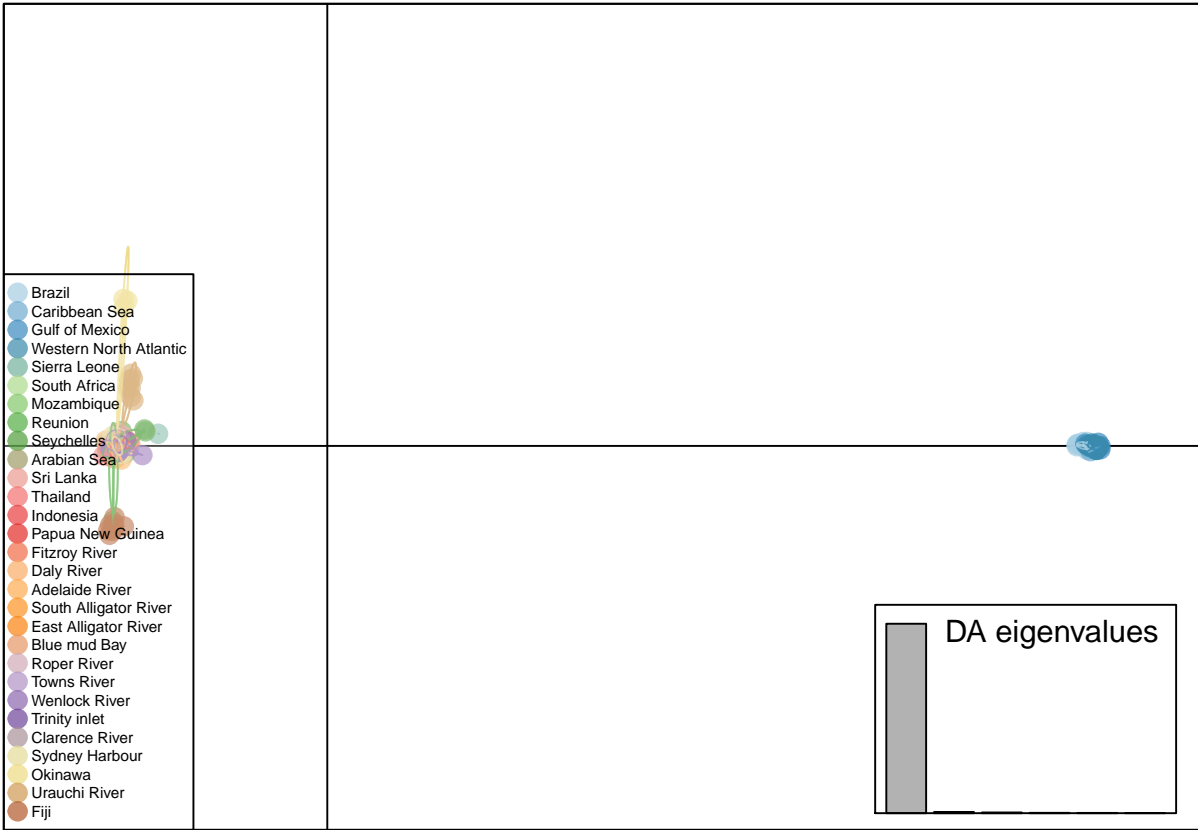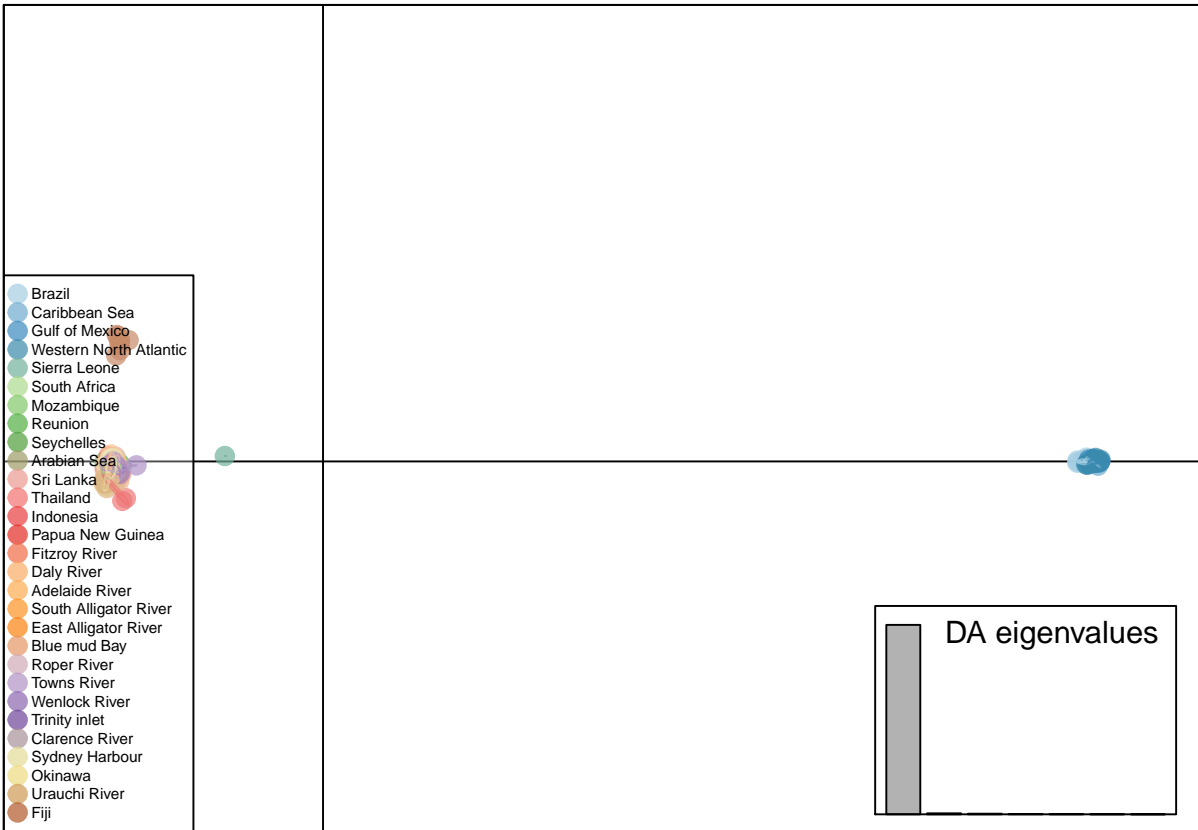

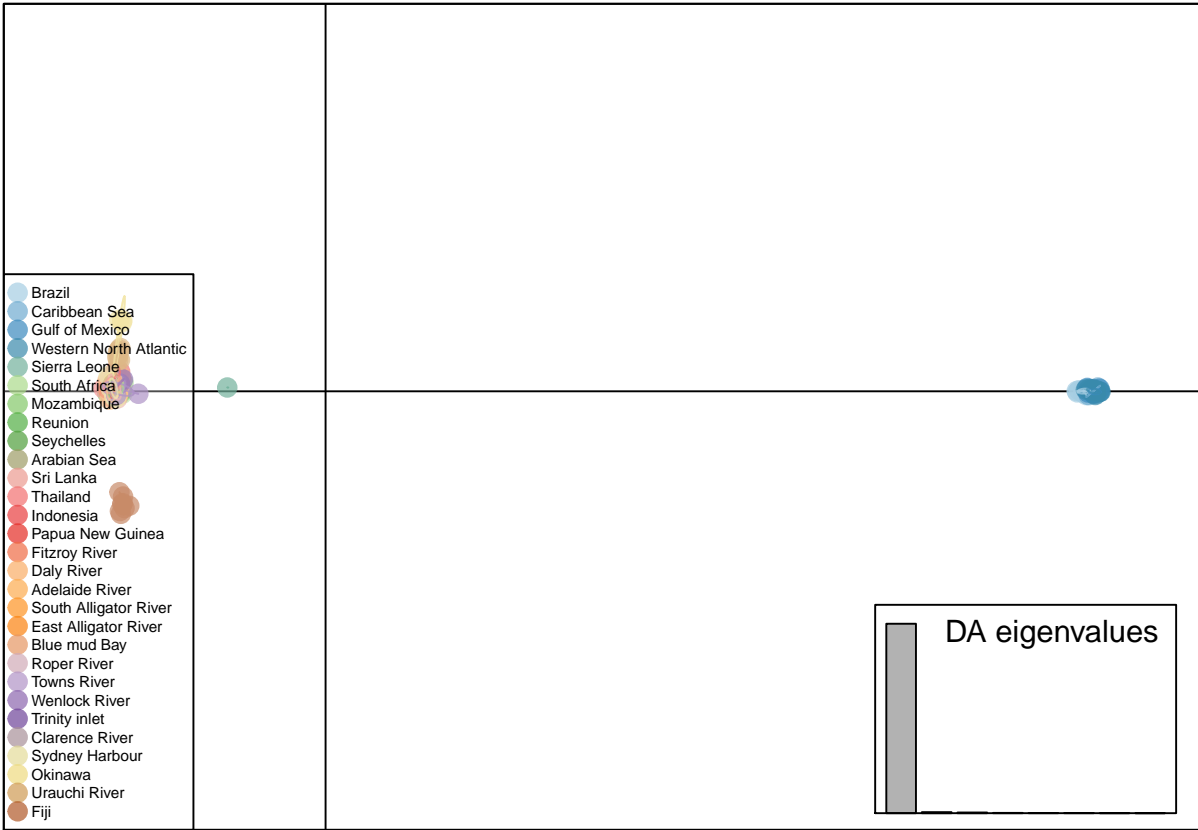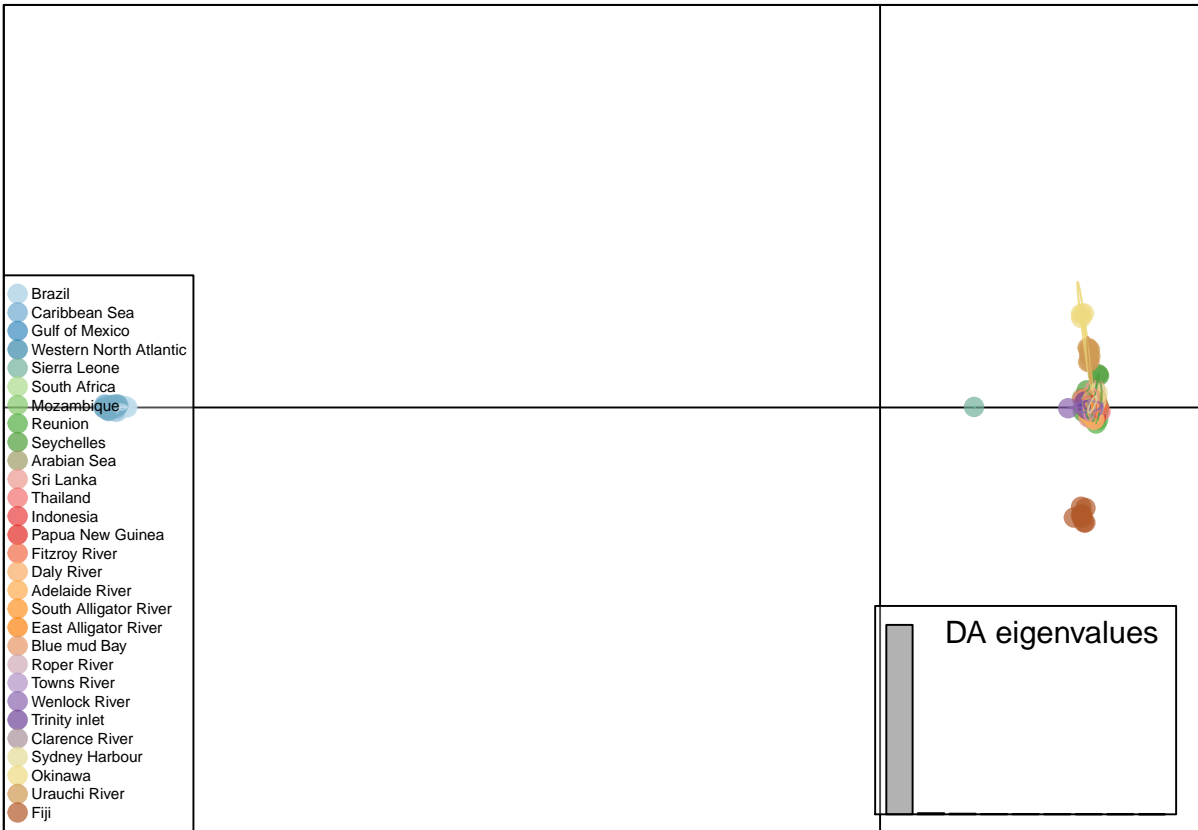

```

for (K in 2:10) {
  colour <- colours.prior[1:K]
  dapc <- get(dapc.all.object.names[K - 1])
  dapc.plot <- ade4::scatter(dapc, cex = 2, legend = TRUE, col = colour,
                             clabel = FALSE, posi.legend = "bottomleft",

```



```
        scree.pca = FALSE, posi.pca = "topleft",
        cleg = 0.75, xax = 1, yax = 2, inset.solid = 0.3)
dev.print(
  device = png,
  file = paste0("DArTseq_ALL_DAPC_scatterplot_pergroups_K",
                K, ".png"),
  width = 30,
  height = 15,
  units = "cm",
  res = 300
)
}
```

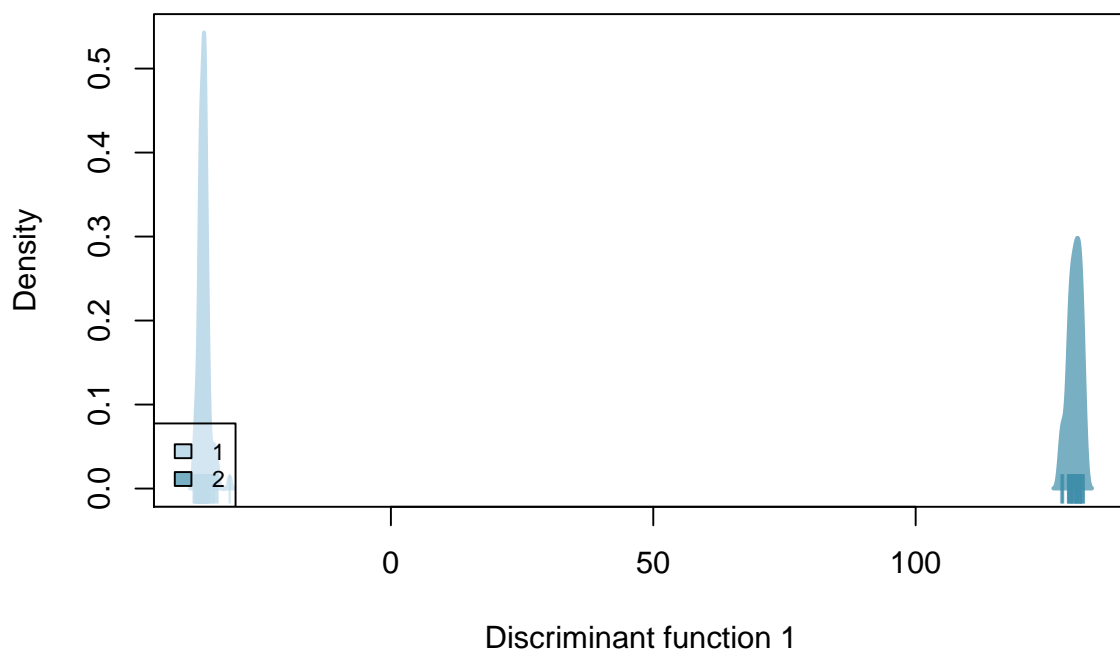

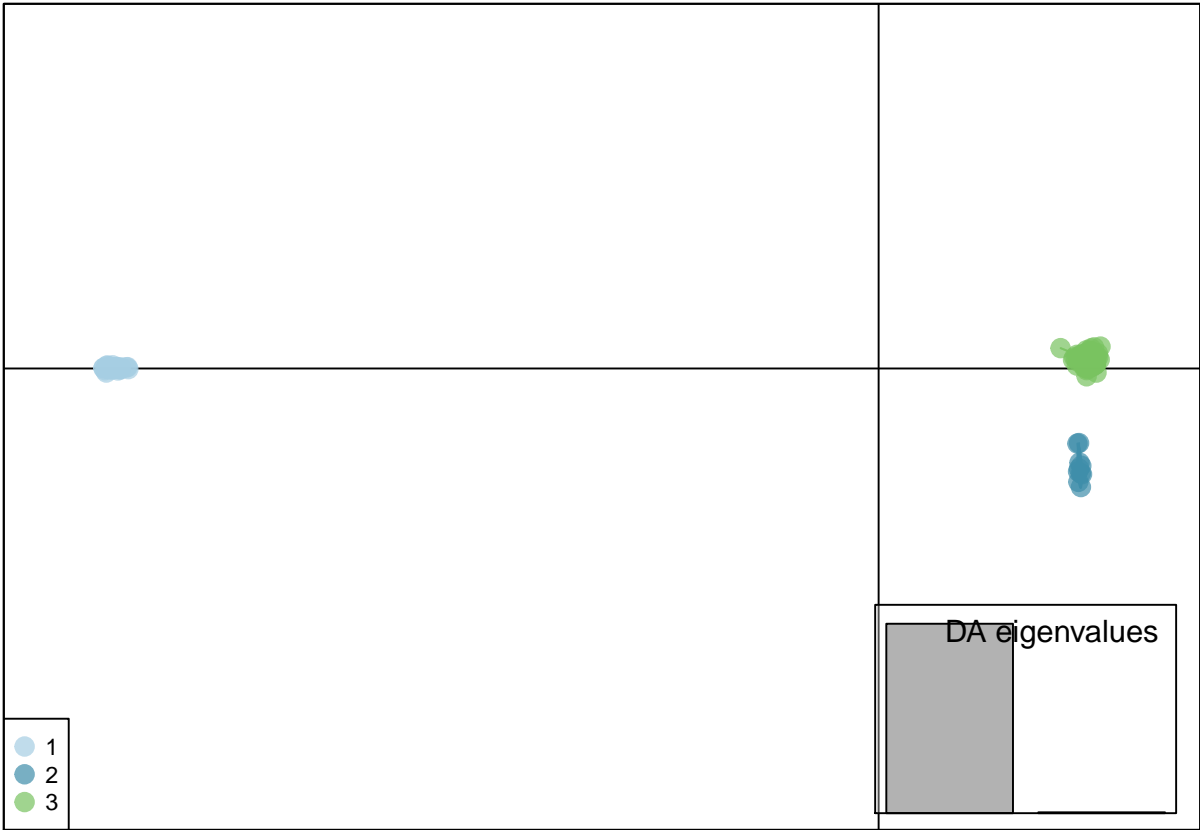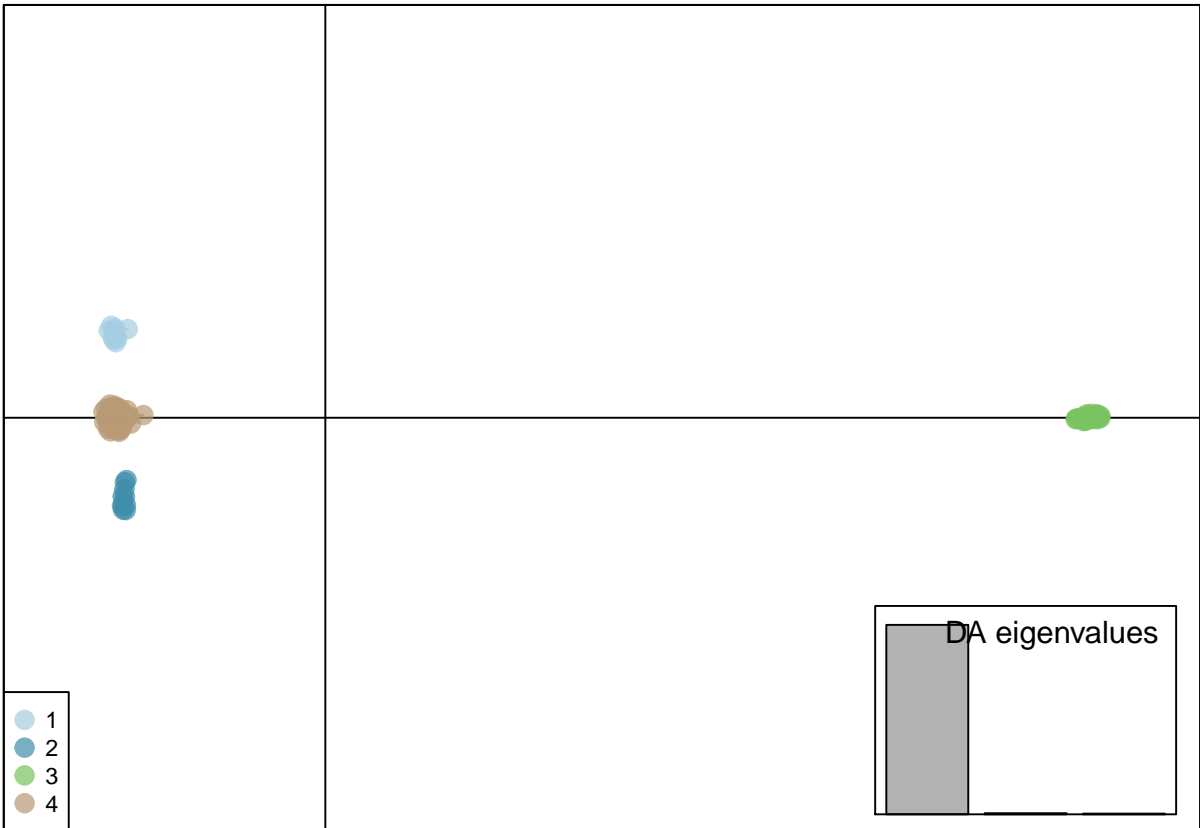

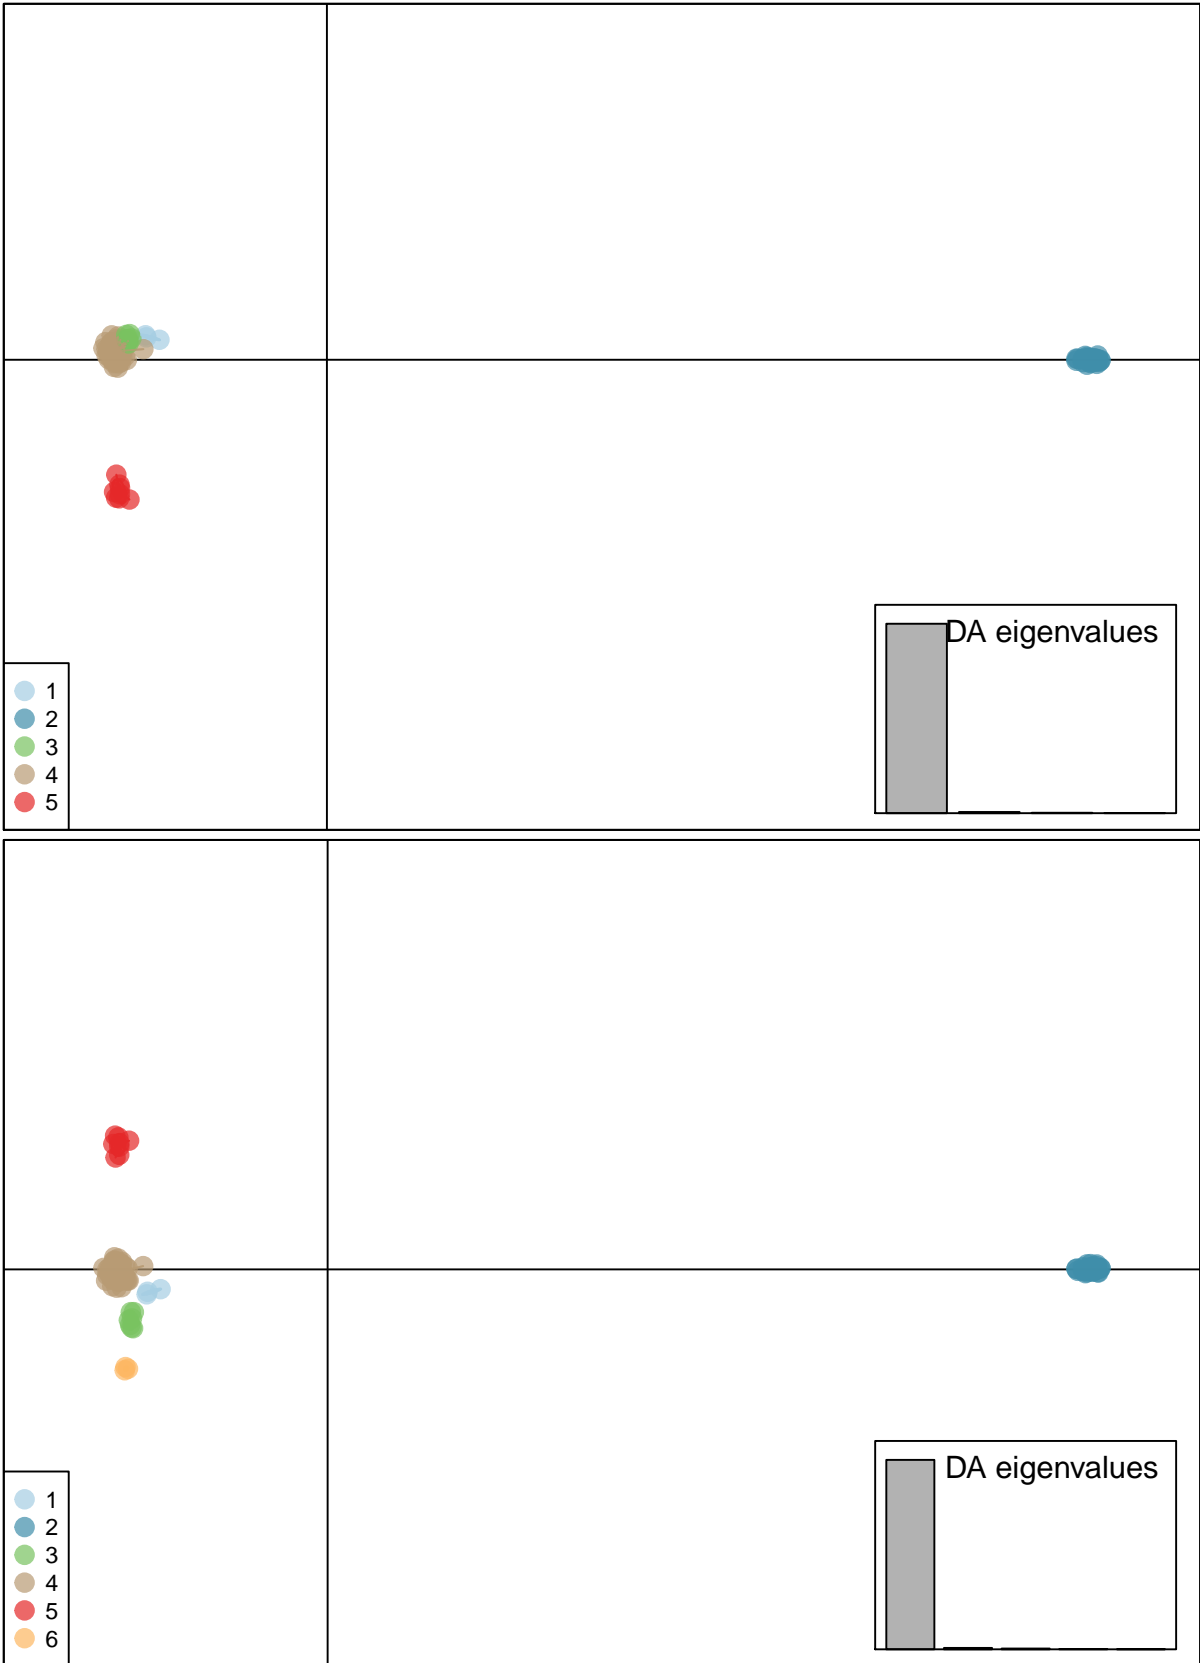

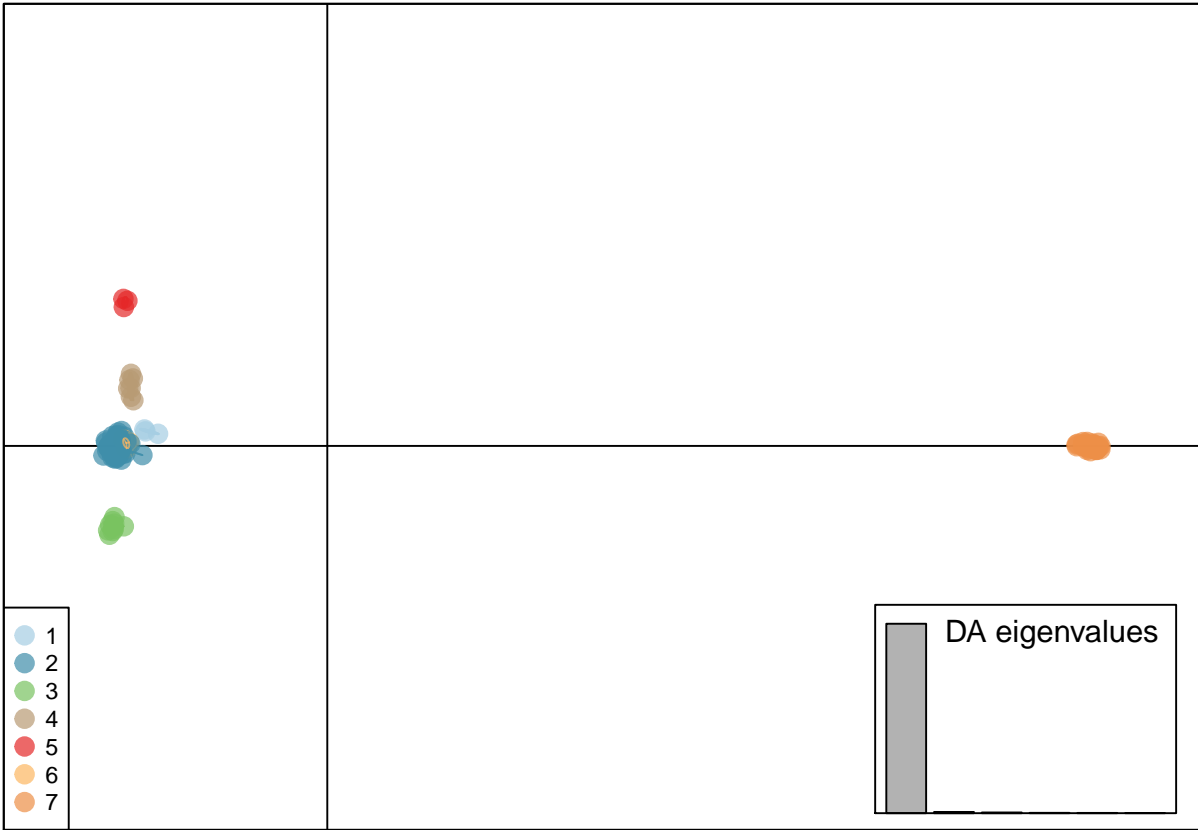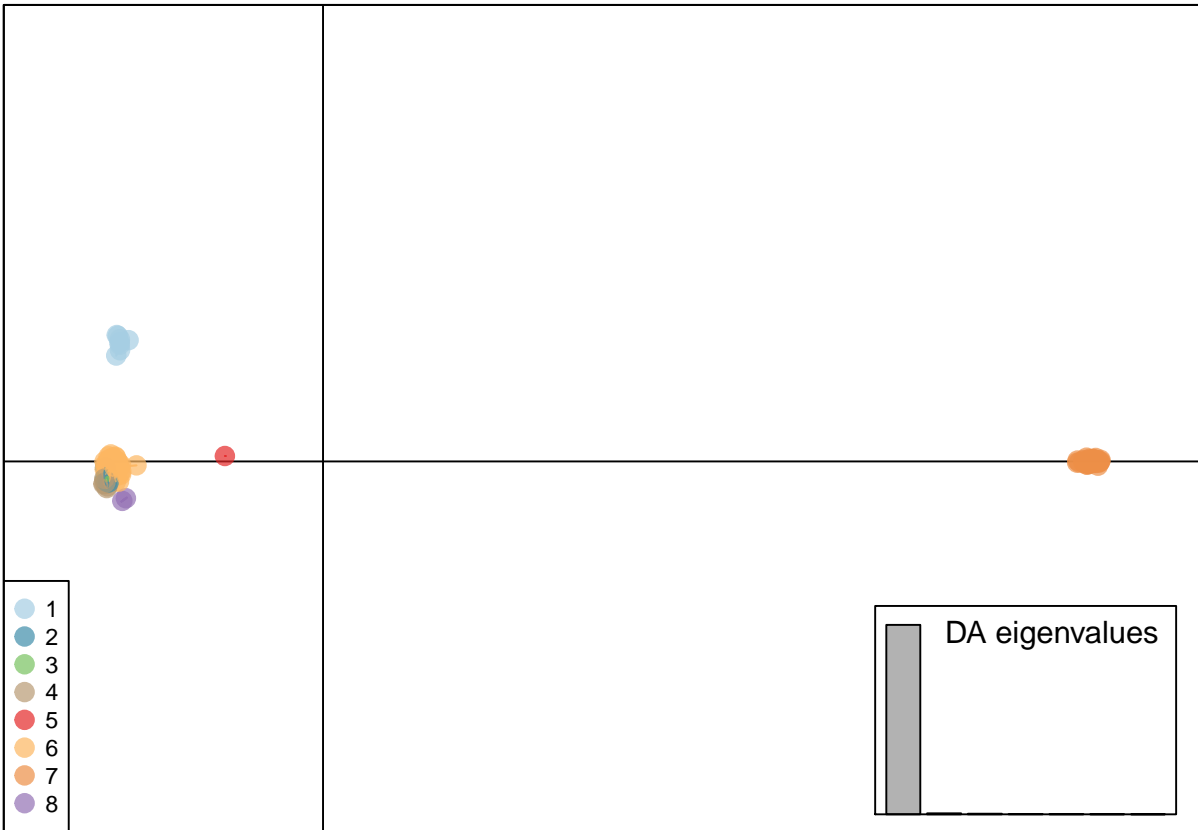

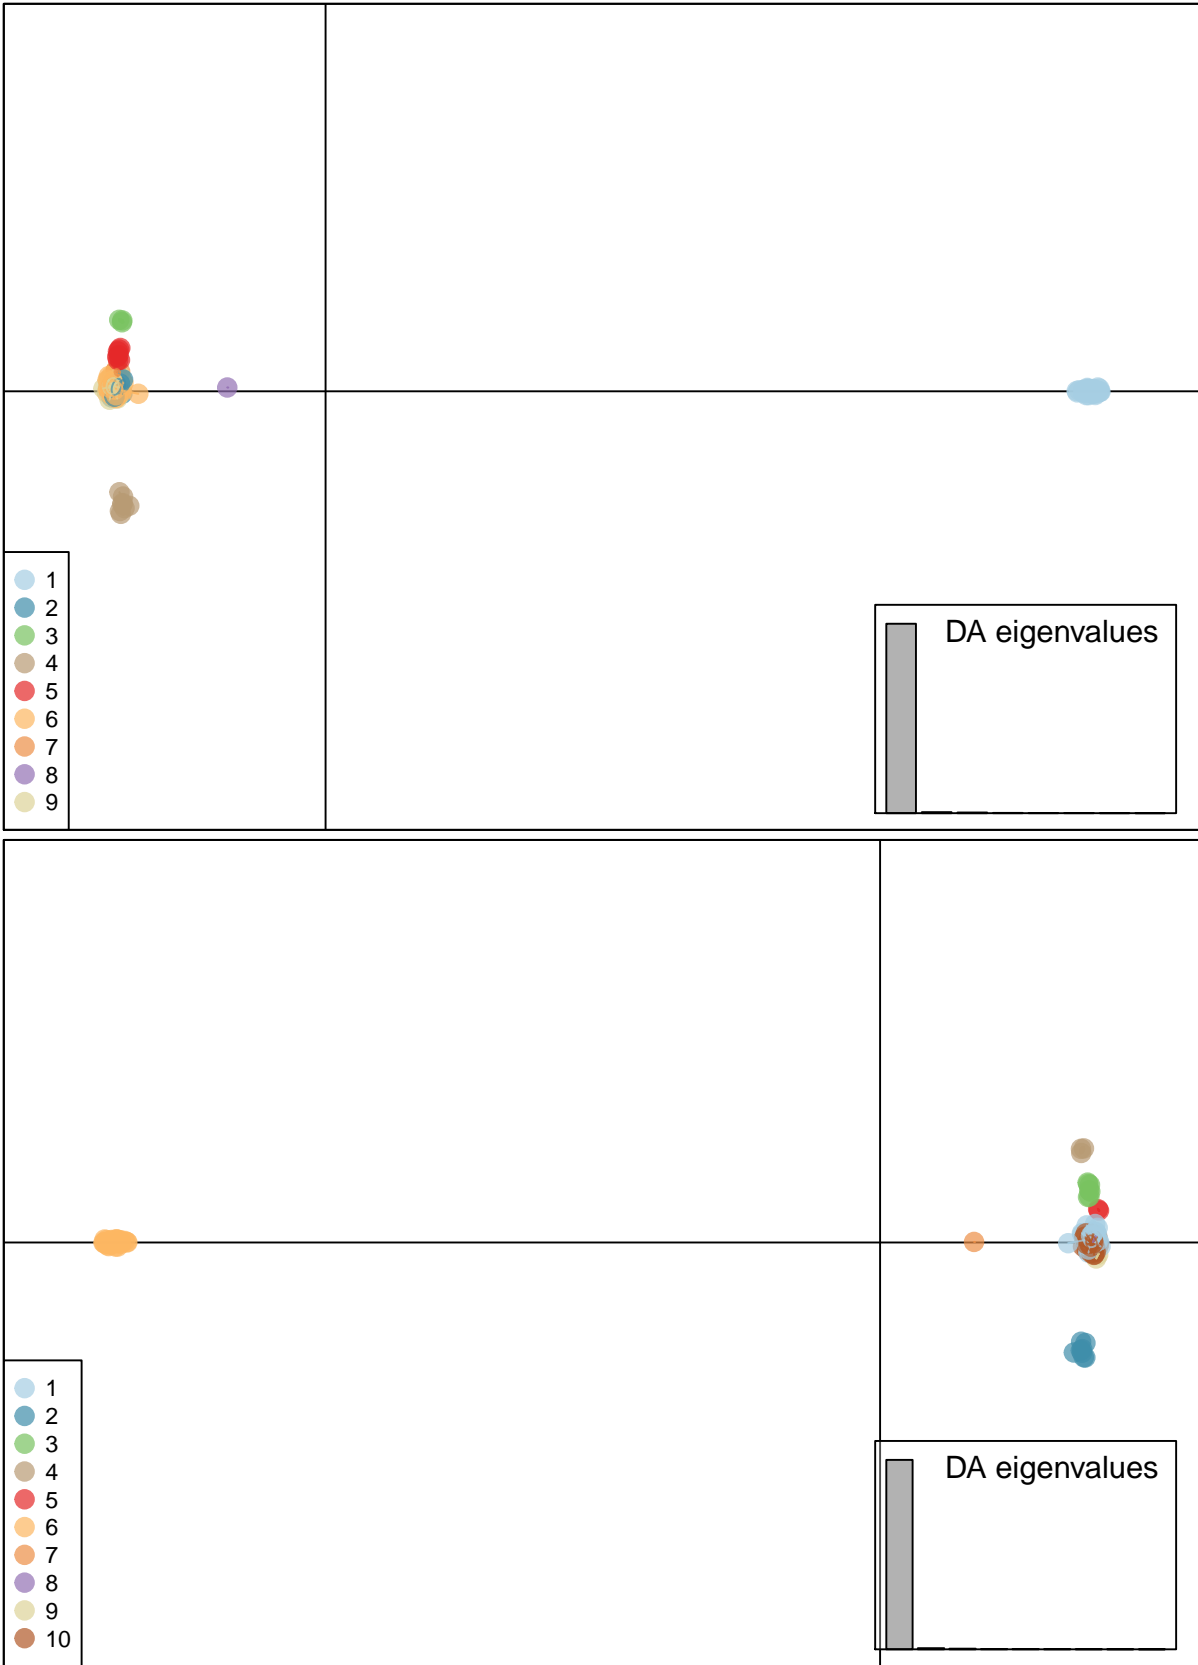

**5.9.5 DAPC scatterplot - FLO**

This code will *colour* individuals according to *sampling location* and **group** individuals according to DAPC **posterior membership**.

```

for (K in 3:10) {
  dapc <- get(dapc.all.object.names[K - 1])
  x <- dapc$ind.coord[,1]
  y <- dapc$ind.coord[,2]
  group <- paste("Group", as.numeric(dapc$assign))
  pop <- BS.dartseq.gl$pop
  df <- data.frame(x, y, group, pop)
  colnames(df) <- c("x", "y", "group", "pop")
  gg <- merge(df, aggregate(cbind(mean.x = x, mean.y = y) ~ group, df, mean),
              by = "group")

  plot <- ggplot2::ggplot(gg, ggplot2::aes(x, y, color = pop)) +
    ggplot2::geom_point(size = 5) +
    ggplot2::geom_point(ggplot2::aes(x = mean.x, y = mean.y), size = 5, shape = 17,
                          color = "black") +
    ggplot2::geom_segment(ggplot2::aes(x = mean.x, y = mean.y, xend = x, yend = y)) +
    ggplot2::scale_colour_manual(values = colours.29) +
    ggplot2::scale_fill_manual(values = colours.29) +
    ggplot2::geom_hline(yintercept = 0) +
    ggplot2::geom_vline(xintercept = 0) +
    ggplot2::labs(subtitle = "",
                  y = "PC2",
                  x = "PC1",
                  title = paste0("K=", K, " & PC=", PC, sep = ""),
                  caption = "") +
    ggplot2::theme_minimal() +
    ggplot2::theme(
      axis.text = ggplot2::element_text(size = 5),
      axis.title.x = ggplot2::element_text(size = 10),
      axis.title.y = ggplot2::element_text(size = 10),
      legend.text = ggplot2::element_text(size = 7))
  print(plot)
  ggplot2::ggsave(plot, filename = paste0("DArTseq_ALL_DAPC_scatterplot2_K", K, ".png"),
                  width = 30, height = 15, units = "cm")
}

```

K=3 & PC=15

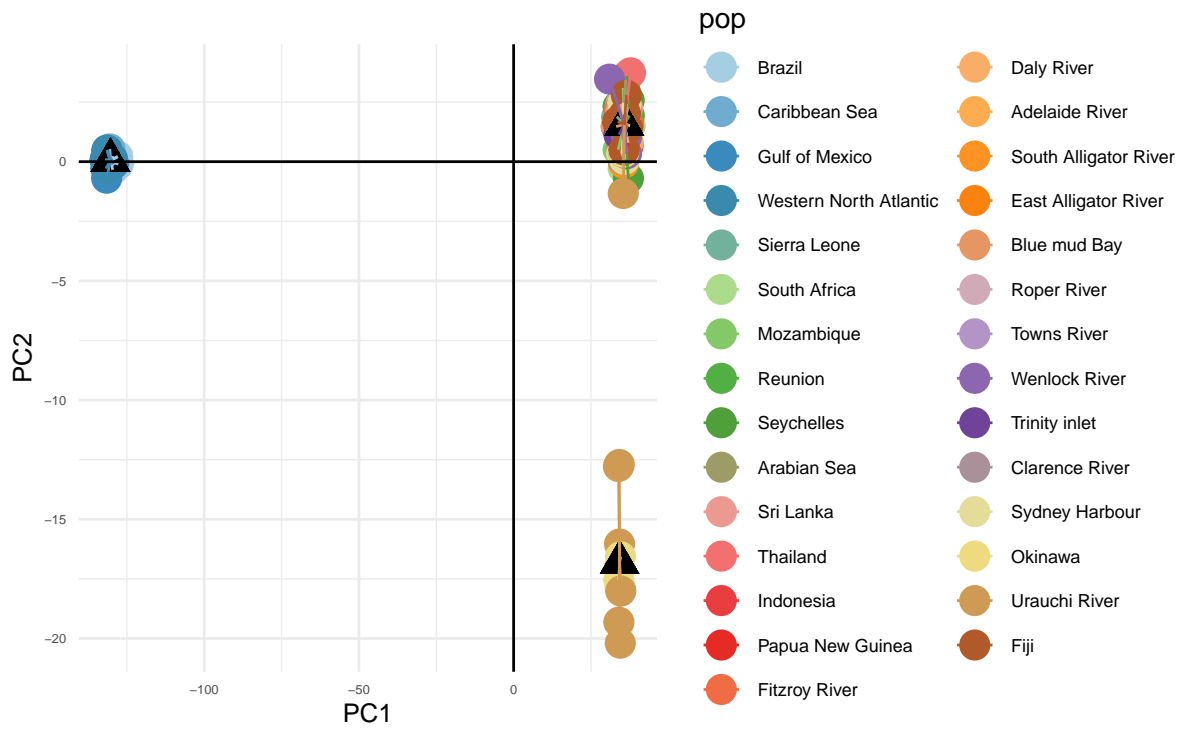

K=4 & PC=15

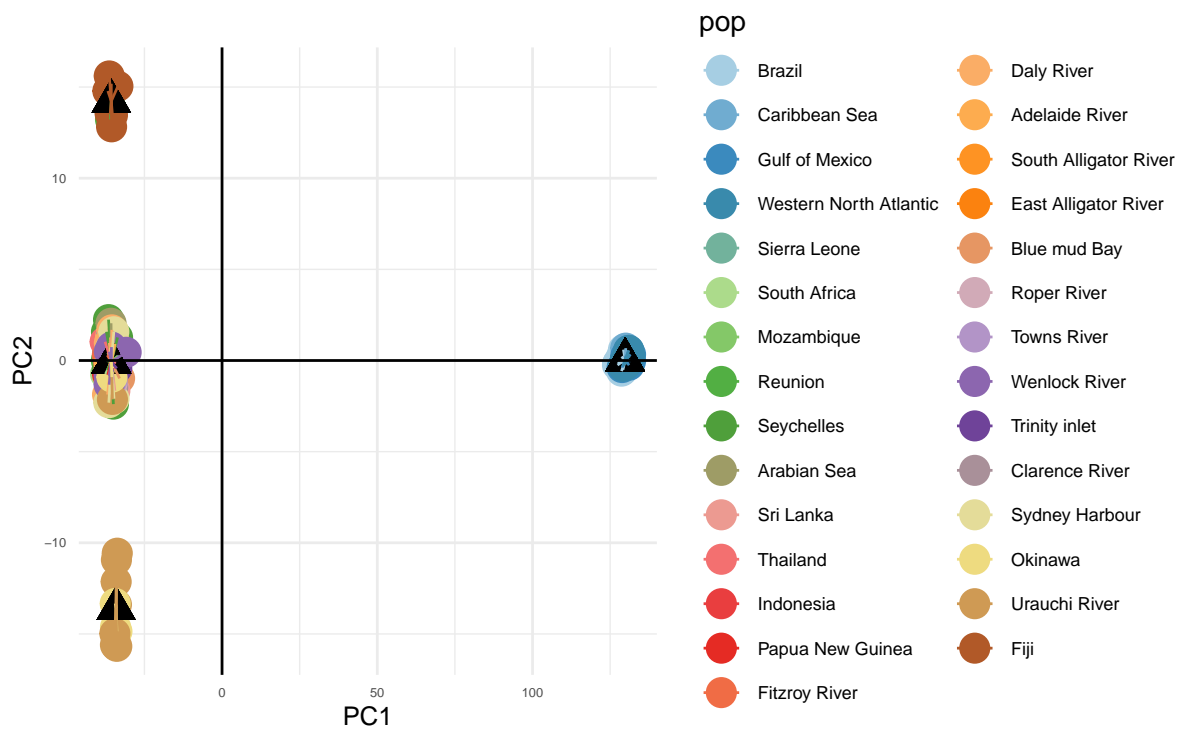

K=5 & PC=15

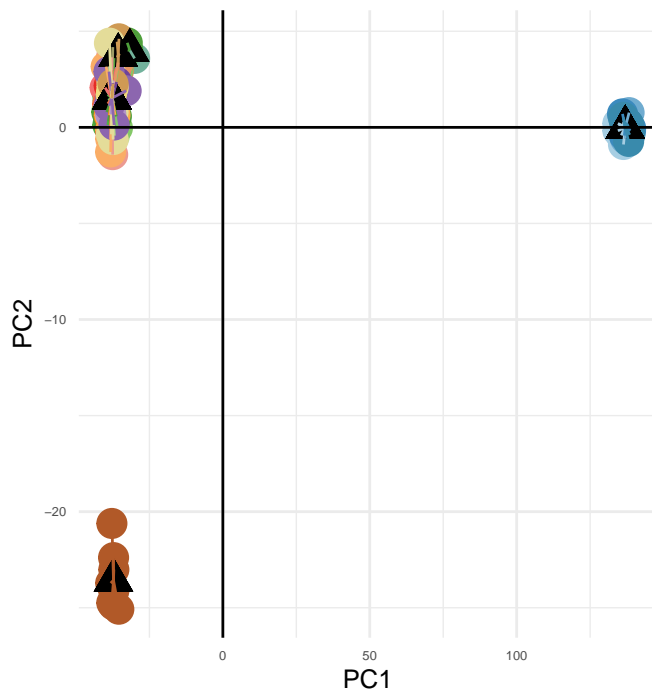

pop

- Brazil
- Caribbean Sea
- Gulf of Mexico
- Western North Atlantic
- Sierra Leone
- South Africa
- Mozambique
- Reunion
- Seychelles
- Arabian Sea
- Sri Lanka
- Thailand
- Indonesia
- Papua New Guinea
- Fitzroy River
- Daly River
- Adelaide River
- South Alligator River
- East Alligator River
- Blue mud Bay
- Roper River
- Towns River
- Wenlock River
- Trinity inlet
- Clarence River
- Sydney Harbour
- Okinawa
- Urauchi River
- Fiji

K=6 & PC=15

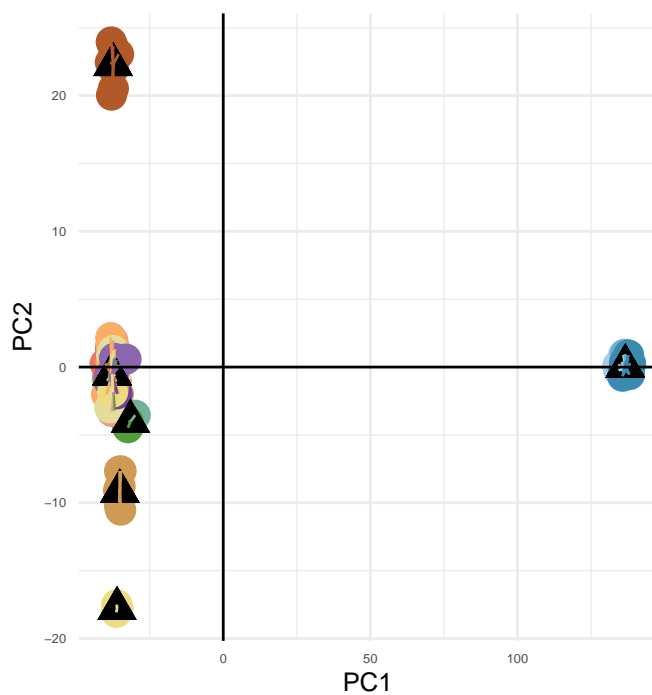

pop

- Brazil
- Caribbean Sea
- Gulf of Mexico
- Western North Atlantic
- Sierra Leone
- South Africa
- Mozambique
- Reunion
- Seychelles
- Arabian Sea
- Sri Lanka
- Thailand
- Indonesia
- Papua New Guinea
- Fitzroy River
- Daly River
- Adelaide River
- South Alligator River
- East Alligator River
- Blue mud Bay
- Roper River
- Towns River
- Wenlock River
- Trinity inlet
- Clarence River
- Sydney Harbour
- Okinawa
- Urauchi River
- Fiji



K=7 & PC=15

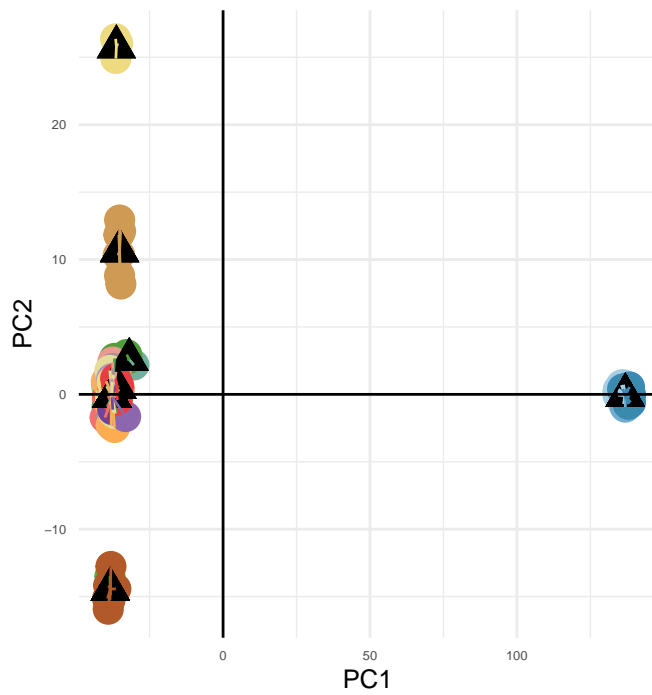

pop

- |                          |                         |
|--------------------------|-------------------------|
| ● Brazil                 | ● Daly River            |
| ● Caribbean Sea          | ● Adelaide River        |
| ● Gulf of Mexico         | ● South Alligator River |
| ● Western North Atlantic | ● East Alligator River  |
| ● Sierra Leone           | ● Blue mud Bay          |
| ● South Africa           | ● Roper River           |
| ● Mozambique             | ● Towns River           |
| ● Reunion                | ● Wenlock River         |
| ● Seychelles             | ● Trinity inlet         |
| ● Arabian Sea            | ● Clarence River        |
| ● Sri Lanka              | ● Sydney Harbour        |
| ● Thailand               | ● Okinawa               |
| ● Indonesia              | ● Urauchi River         |
| ● Papua New Guinea       | ● Fiji                  |
| ● Fitzroy River          |                         |

K=8 & PC=15

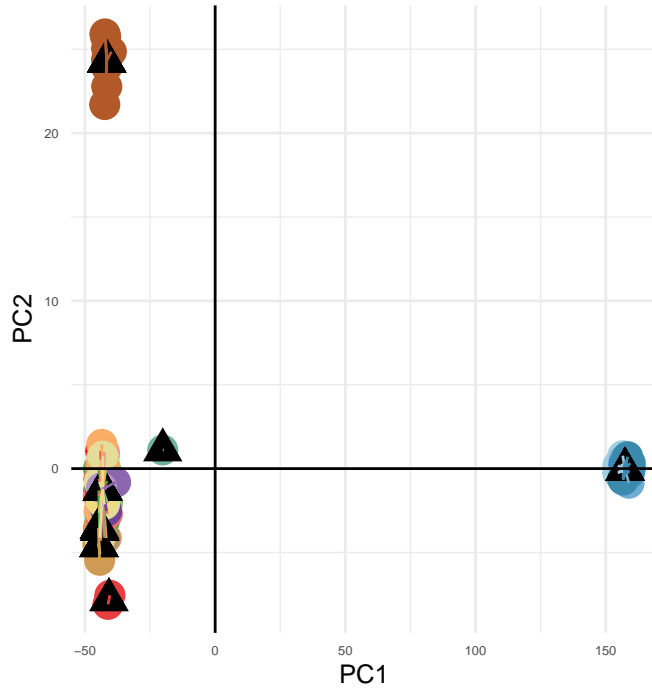

pop

- |                          |                         |
|--------------------------|-------------------------|
| ● Brazil                 | ● Daly River            |
| ● Caribbean Sea          | ● Adelaide River        |
| ● Gulf of Mexico         | ● South Alligator River |
| ● Western North Atlantic | ● East Alligator River  |
| ● Sierra Leone           | ● Blue mud Bay          |
| ● South Africa           | ● Roper River           |
| ● Mozambique             | ● Towns River           |
| ● Reunion                | ● Wenlock River         |
| ● Seychelles             | ● Trinity inlet         |
| ● Arabian Sea            | ● Clarence River        |
| ● Sri Lanka              | ● Sydney Harbour        |
| ● Thailand               | ● Okinawa               |
| ● Indonesia              | ● Urauchi River         |
| ● Papua New Guinea       | ● Fiji                  |
| ● Fitzroy River          |                         |

K=9 & PC=15

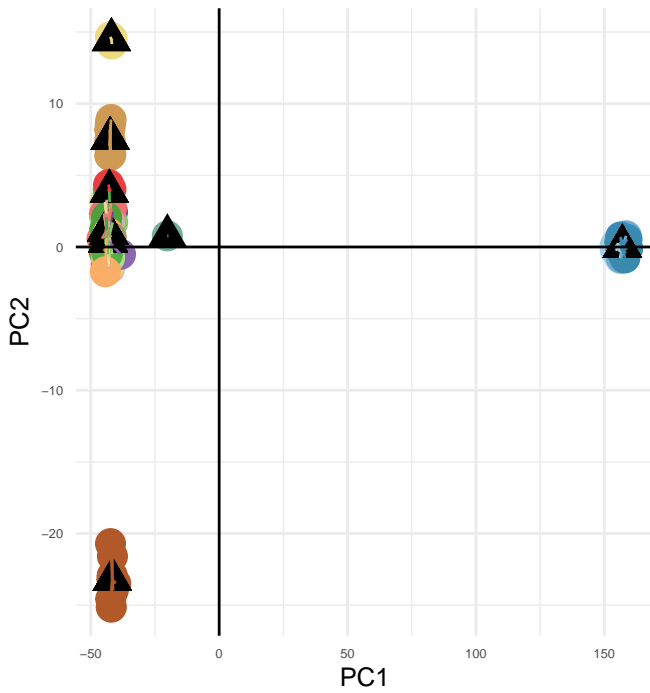

pop

- |                          |                         |
|--------------------------|-------------------------|
| ● Brazil                 | ● Daly River            |
| ● Caribbean Sea          | ● Adelaide River        |
| ● Gulf of Mexico         | ● South Alligator River |
| ● Western North Atlantic | ● East Alligator River  |
| ● Sierra Leone           | ● Blue mud Bay          |
| ● South Africa           | ● Roper River           |
| ● Mozambique             | ● Towns River           |
| ● Reunion                | ● Wenlock River         |
| ● Seychelles             | ● Trinity inlet         |
| ● Arabian Sea            | ● Clarence River        |
| ● Sri Lanka              | ● Sydney Harbour        |
| ● Thailand               | ● Okinawa               |
| ● Indonesia              | ● Urauchi River         |
| ● Papua New Guinea       | ● Fiji                  |
| ● Fitzroy River          |                         |

K=10 & PC=15

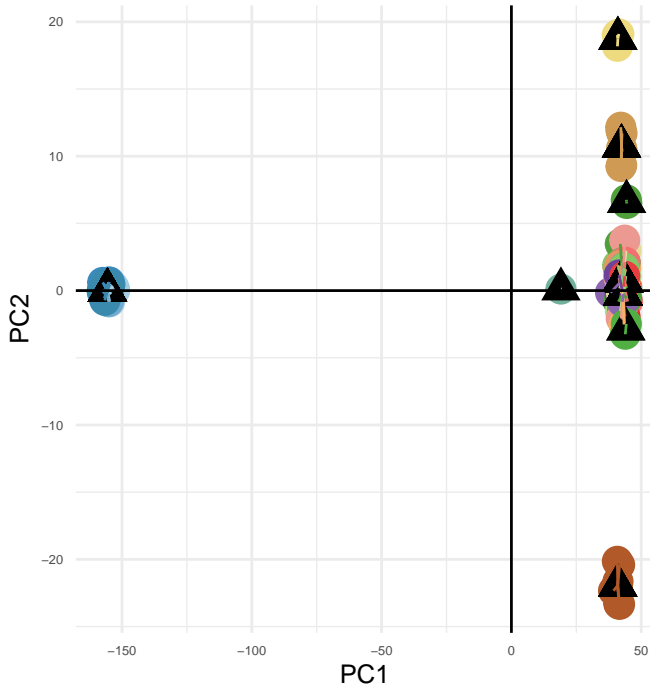

pop

- |                          |                         |
|--------------------------|-------------------------|
| ● Brazil                 | ● Daly River            |
| ● Caribbean Sea          | ● Adelaide River        |
| ● Gulf of Mexico         | ● South Alligator River |
| ● Western North Atlantic | ● East Alligator River  |
| ● Sierra Leone           | ● Blue mud Bay          |
| ● South Africa           | ● Roper River           |
| ● Mozambique             | ● Towns River           |
| ● Reunion                | ● Wenlock River         |
| ● Seychelles             | ● Trinity inlet         |
| ● Arabian Sea            | ● Clarence River        |
| ● Sri Lanka              | ● Sydney Harbour        |
| ● Thailand               | ● Okinawa               |
| ● Indonesia              | ● Urauchi River         |
| ● Papua New Guinea       | ● Fiji                  |
| ● Fitzroy River          |                         |

## 6 DArTseq - marker selection

### 6.1 Sex-linked markers

```
load("Sex_results.Rdata")
bull_shark_sex.markers <- bull_shark$sexy.summary[bull_shark$sexy.summary$METHOD %in%
  c("presence/absence_method-SNP",
    "presence/absence_method-SILICO",
    "heterozygosity_method-SNP",
    "Coverage_method-SNP"),]
dim(bull_shark_sex.markers) #210 SLMs

knitr::kable(
  bull_shark_sex.markers[c(20:25),],
  caption = "210 sex-linked markers with a SNP from DArTseq data for bait design." %>%
  kableExtra::kable_styling(full_width = FALSE, font_size = 5,
    latex_options = c("hold_position"))

sex.markers <- bull_shark_sex.markers$CLONE_ID

## [1] 172 5
```

Table 6: 210 sex-linked markers with a SNP from DArTseq data for bait design.

| SEX_MARKERS          | CLONE_ID  | METHOD              | MARKER_TYPE            | SEQUENCE                                 |
|----------------------|-----------|---------------------|------------------------|------------------------------------------|
| CHROM_1_100203043_49 | 100203043 | Coverage_method-SNP | Homogametic_sex-marker | TGCAGCTTCCCCCCAGTTGCATTTGCAGGGTGTGCAGCT  |
| CHROM_1_100203980_10 | 100203980 | Coverage_method-SNP | Homogametic_sex-marker | TGCAGGAATTYTAAATCCAAATAATTGCTTTCAGGTGGA  |
| CHROM_1_100204589_28 | 100204589 | Coverage_method-SNP | Homogametic_sex-marker | TGCAGGAGTCACTTTTGCCTCGTGATCARAAACAGTTTGG |
| CHROM_1_100204774_22 | 100204774 | Coverage_method-SNP | Homogametic_sex-marker | TGCAGGATCACAACTGTGTGCAYGTGCCTGTGTGTGTGCG |
| CHROM_1_100204975_7  | 100204975 | Coverage_method-SNP | Homogametic_sex-marker | TGCAGGAYTCATGCAGCCACTGCAACAGAGGTCCGAAGTT |
| CHROM_1_100205908_20 | 100205908 | Coverage_method-SNP | Homogametic_sex-marker | TGCAGGCTGGGTTTGTAACTSATGCACAAGGACTGAGGTC |

### 6.2 Popgen markers

#### 6.2.1 Load data

```
load("DArTseq_ALL_objects3.Rdata")
nInd(BS.dartseq.gl) # 149
nLoc(BS.dartseq.gl) # 16989
```

```
## [1] 149
## [1] 16989
```

#### 6.2.2 Extra filters

```
snp <- BS.dartseq.gl$other$loc.metrics

# CLUSTER SIZE
ggplot2::qplot(x = snp$CLUSTER_SIZE, binwidth = 1, main = "Cluster size")
```

## Cluster size

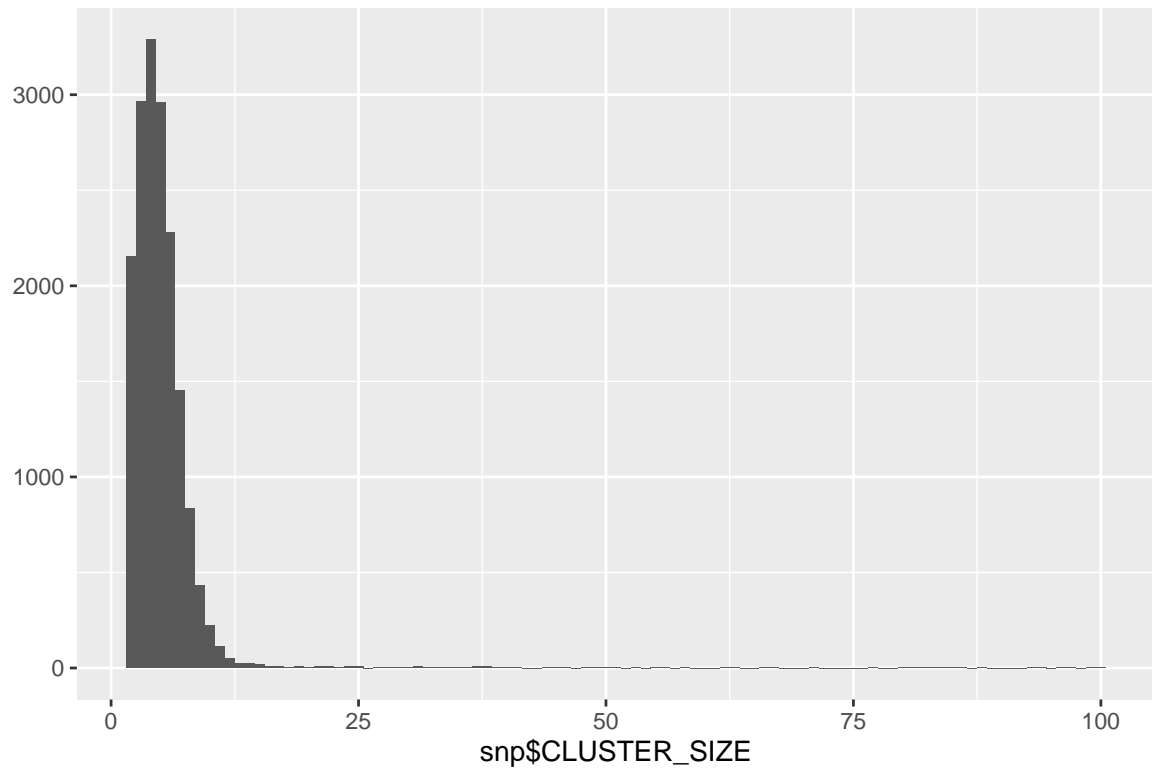

```
snp <- dplyr::filter(snp, CLUSTER_SIZE < 10)

# SEQUENCE LENGTH
seq.length <- sapply(X = snp$SEQUENCE, nchar, simplify = TRUE)
summary(seq.length)
snp <- dplyr::filter(snp, seq.length > 60)

# LOW-COMPLEXITY
res <- c()
for (i in 1:length(snp$SEQUENCE)) {
  seqsVector <- snp$SEQUENCE[i]
  lC_nucl <- c()
  for (nucl in c("A", "T", "G", "C")) {
    lC_nucl = c(lC_nucl,
               Biostrings::longestConsecutive(seqsVector, nucl))
  }
  res <- c(res, max(lC_nucl))
}
ggplot2::qplot(x = res, binwidth = 1, main = "Nucleotide repeats",
               xlab = "Longest consecutive repeats")
```

## Nucleotide repeats

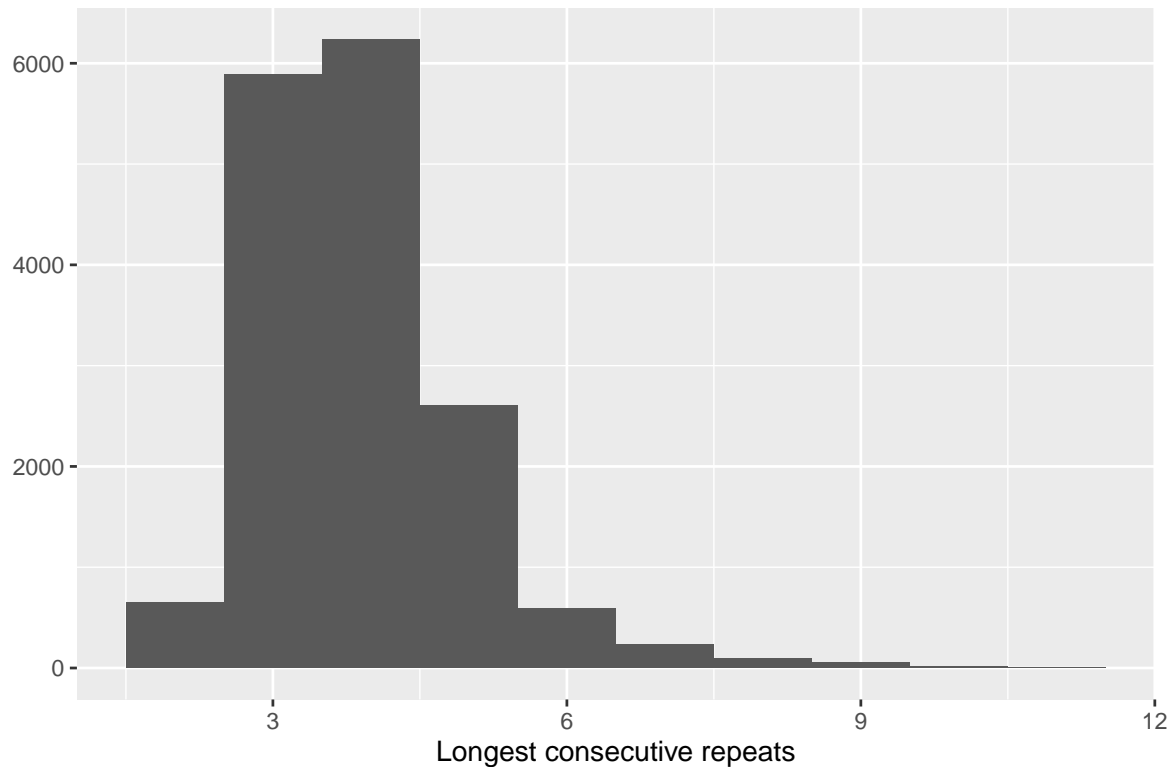

```
snp <- dplyr::filter(snp, res < 6)

snp <- dplyr::distinct(snp, LOCUS, .keep_all = TRUE) %>%
  dplyr::rename(CLONE_ID = LOCUS, AlleleSequence = SEQUENCE)
dim(snp)
snp <- snp[snp$MARKERS %in% sample(snp$MARKERS, 3200, replace = FALSE),]
snp %>% dplyr::select(c("CLONE_ID", "AlleleSequence"))
head(snp)
# readr::write_tsv(snp, "Selected_sex-markers_for_baits.tsv")

##   Min. 1st Qu.  Median    Mean 3rd Qu.    Max.
##   69      69      69      69      69      69
## [1] 15381    36
## # A tibble: 6 x 2
##   CLONE_ID AlleleSequence
##   <chr>    <chr>
## 1 100190323 TGCAGAGTGCCTCAGAGAGATTCACTGAAACTCAGTGGGCAGAGCCTATTCCTGCTGAAGAGGCT~
## 2 100190357 TGCAGTGAAGTTATTGTGAAAATCCCCTAGTTGCCACACACTGGTGTCTGTTCAGGTACATGAGGGA~
## 3 100190483 TGCAGAAAAGCAGACATTTAAGACAAGATTTGAACTGGCGGGTGCATGAGCGGTTACAGCAGGAATGC~
## 4 100190716 TGCAGAAAAGAATGGATTGCAAGGACATAGCTACAAGTATTGCTTGGGTAAAGAGAAAATTAGCCAC~
## 5 100190719 TGCAGAAAGACAGTTTAAACAACAAGGTCGAATGCAACATTTACAGTTGCATGAGCGGTTACAGCAG~
## 6 100190991 TGCAGAAATTCGTGTGTTAGACCTGCCGGGAGACAGCAAACCGAAAGGGTCCGGATTAAACAGGCAG~
```

### 6.3 Test selected markers

```
baits <- readr::read_tsv("Total_selected_markers.tsv")

dartseq.data <- "DArTseq_SNP_OrderAppendix_2_DCarcha19-4454.csv"
strata <- "Bull_shark_DArTseq_strata.tsv"
BSsnp <- radiator::read_dart(dartseq.data, strata, tidy.dart = FALSE,
                             parallel.core = 1)
```

```

markers.meta <- radiator::extract_markers_metadata(BSSnp, whitelist = TRUE)
individuals.meta <- radiator::extract_individuals_metadata(BSSnp, whitelist = TRUE)
BSconvert <- radiator::genomic_converter(BSSnp ,output = "tidy")
BS.dartseq.raw.tidy <- BSconvert$tidy.data
save(BS.dartseq.raw.tidy,markers.meta, individuals.meta,
     file = "DARtseq_Raw_tidy.Rdata")
load("DARtseq_Raw_tidy.Rdata")

length(unique(BS.dartseq.raw.tidy$INDIVIDUALS)) #219
length(unique(BS.dartseq.raw.tidy$MARKERS)) #250945

BS.dartseq.baits.tidy <- BS.dartseq.raw.tidy[BS.dartseq.raw.tidy$MARKERS %in%
                                           baits$AlleleID &
                                           BS.dartseq.raw.tidy$INDIVIDUALS %in%
                                           BS.dartseq.gl$ind.names,]

length(unique(BS.dartseq.baits.tidy$INDIVIDUALS)) #142
length(unique(BS.dartseq.baits.tidy$MARKERS)) #3409

Convert <- radiator::genomic_converter(BS.dartseq.baits.tidy,
                                       output = c("genlight","gtypes"))
BS.dartseq.baits.gl <- Convert$genlight
BS.dartseq.baits.gt <- Convert$gtypes

save(BS.dartseq.baits.tidy,BS.dartseq.baits.gl, BS.dartseq.baits.gt,
     individuals.meta, markers.meta, file = "DARtseq_baits.Rdata")

```

### 6.3.1 Load data

```

baits <- readr::read_tsv("Total_selected_markers.tsv")
load("DARtseq_baits.Rdata")
pop.levels <- c("Brazil", "Caribbean Sea", "Gulf of Mexico", "Western North Atlantic",
               "Sierra Leone", "South Africa", "Mozambique", "Reunion", "Seychelles",
               "Arabian Sea", "Sri Lanka", "Thailand", "Indonesia", "Papua New Guinea",
               "Australia", "Japan", "Fiji")
BS.dartseq.baits.gl$pop <- factor(BS.dartseq.baits.gl$other$ind.metrics$Site,
                                levels = pop.levels)
BS.dartseq.baits.gl <- BS.dartseq.baits.gl[order(BS.dartseq.baits.gl$pop,
                                                BS.dartseq.baits.gl$ind.names),]

BS.dartseq.baits.tidy$POP_ID <- factor(BS.dartseq.baits.tidy$Site, levels = pop.levels)
BS.dartseq.baits.tidy <- BS.dartseq.baits.tidy[order(
  BS.dartseq.baits.tidy$POP_ID, BS.dartseq.baits.tidy$INDIVIDUALS),]

adegenet::nInd(BS.dartseq.baits.gl) # 142
adegenet::nLoc(BS.dartseq.baits.gl) # 3409
summary(BS.dartseq.baits.gl$pop)
sum(duplicated(BS.dartseq.baits.gl$other$ind.metrics$`Genetic code`))# 0 replicate left
sum(baits$CloneID %in% BS.dartseq.baits.gl$other$loc.metrics$LOCUS) #3409

```

```

## [1] 142
## [1] 3409
##           Brazil           Caribbean Sea           Gulf of Mexico
##           11                2                11
## Western North Atlantic           Sierra Leone           South Africa
##           8                1                9
##           Mozambique           Reunion           Seychelles
##           8                9                10

```

```
##           Arabian Sea           Sri Lanka           Thailand
##           6                   4                   4
##           Indonesia           Papua New Guinea       Australia
##           4                   2                   34
##           Japan               Fiji
##           11                  8
## [1] 0
## [1] 3409
```

### 6.3.2 Genetic diversity

```
set.seed(124)
gl <- BS.dartseq.baits.gl
pop.levels <- c("Brazil","Caribbean Sea","Gulf of Mexico", "Western North Atlantic",
               "South Africa", "Mozambique", "Reunion" , "Seychelles", "Arabian Sea",
               "Sri Lanka", "Thailand", "Indonesia", "Papua New Guinea" , "Australia",
               "Japan", "Fiji")
gl <- gl[gl$pop != "Sierra Leone"] #only 1 sample
gl$pop <- factor(gl$other$ind.metrics$Site, levels = pop.levels)
gl <- gl[order(gl$pop, gl$ind.names)]

gl2gpop(gl, filename = "BS_dartseq_all_baits_genepop.txt")
bastat <- diveRsity::basicStats(infile = "BS_dartseq_all_baits_genepop.txt",
                                outfile = "BS_dartseq_all_baits_BasicStat_output.txt",
                                fis_ci = TRUE, ar_ci = TRUE, fis_boots = 1000,
                                ar_boots = 1000, mc_reps = 1000,
                                rarefaction = FALSE, ar_alpha = 0.05,
                                fis_alpha = 0.05)

length(bastat$main_tab) #16
gendiv <- data.frame(
  "Brazil" = bastat$main_tab[[1]]$overall,
  "Caribbean Sea" = bastat$main_tab[[2]]$overall,
  "Gulf of Mexico" = bastat$main_tab[[3]]$overall,
  "Western North Atlantic" = bastat$main_tab[[4]]$overall,
  "South Africa" = bastat$main_tab[[5]]$overall,
  "Mozambique" = bastat$main_tab[[6]]$overall,
  "Reunion" = bastat$main_tab[[7]]$overall,
  "Seychelles" = bastat$main_tab[[8]]$overall,
  "Arabian Sea" = bastat$main_tab[[9]]$overall,
  "Sri Lanka" = bastat$main_tab[[10]]$overall,
  "Thailand" = bastat$main_tab[[11]]$overall,
  "Indonesia" = bastat$main_tab[[12]]$overall,
  "Papua New Guinea" = bastat$main_tab[[13]]$overall,
  "Australia" = bastat$main_tab[[14]]$overall,
  "Japan" = bastat$main_tab[[15]]$overall,
  "Fiji" = bastat$main_tab[[16]]$overall,
  check.names = FALSE)
row.names(gendiv) <- rownames(bastat$main_tab[[1]])

df <- as.data.frame(gl)
df[df == "0"] <- "11"
df[df == "1"] <- "12"
df[df == "2"] <- "22"
gen.gi <- adegenet::df2genind(df, ploidy = 2, ncode = 2, pop = gl$pop)
ris_basic <- hierfstat::basic.stats(gen.gi)
fis.hierfstat <- apply(ris_basic$Fis, 2, mean, na.rm=T)
fis.CI <- hierfstat::boot.ppfis(gen.gi, nboot = 1000, quant = c(0.025,0.975),
                               diploid = TRUE, dig = 4)
```

```

df <- data.frame(fis.hierfstat,fis.CI.low = fis.CI$ Cis.ci[,1],
                 fis.CI.high = fis.CI$ Cis.ci[,2])
df <- as.data.frame(t(df))
gendiv <- rbind(gendiv, df)

readr::write_tsv(gendiv, path = "DARtseq_ALL_baits_gendiv.txt")
save(gendiv, file = "DARtseq_ALL_baits_gendiv.Rdata")

load("DARtseq_ALL_baits_gendiv.Rdata")
shortnames <- c("BRZ", "CAR", "GOM", "WNA", "SAF", "MOZ", "RUN" , "SEY",
                "ARS", "SRL", "TAI", "IND", "PNG" , "AUS", "JAP", "FIJ")
knitr::kable(gendiv, col.names = shortnames, digits = 4,caption = "") %>%
  kableExtra::kable_styling(full_width = FALSE,font_size = 5,
                             latex_options = c( "hold_position")) %>%
  kableExtra::landscape()

```



Table 7:

|               | BRZ     | CAR     | GOM     | WNA     | SAF     | MOZ     | RUN     | SEY     | ARS     | SRL     | TAI     | IND     | PNG     | AUS     | JAP     | FIJ     |
|---------------|---------|---------|---------|---------|---------|---------|---------|---------|---------|---------|---------|---------|---------|---------|---------|---------|
| ar            | 1.0740  | 1.0440  | 1.0700  | 1.0710  | 1.1120  | 1.0690  | 1.1100  | 1.1110  | 1.1040  | 1.1020  | 1.0970  | 1.0930  | 1.0720  | 1.1160  | 1.1070  | 1.0990  |
| size          | 10.7760 | 1.9490  | 10.7670 | 7.8190  | 8.8250  | 7.2800  | 8.7800  | 9.8020  | 5.8420  | 3.9550  | 3.9320  | 3.9270  | 1.9720  | 33.2310 | 10.8050 | 7.6950  |
| obs_het       | 0.0420  | 0.0380  | 0.0400  | 0.0420  | 0.0620  | 0.0570  | 0.0620  | 0.0610  | 0.0600  | 0.0620  | 0.0590  | 0.0590  | 0.0600  | 0.0610  | 0.0600  | 0.0610  |
| exp_het       | 0.0480  | 0.0350  | 0.0460  | 0.0460  | 0.0670  | 0.0650  | 0.0670  | 0.0650  | 0.0630  | 0.0590  | 0.0580  | 0.0560  | 0.0440  | 0.0690  | 0.0630  | 0.0660  |
| uexp_het      | 0.0490  | 0.0440  | 0.0470  | 0.0480  | 0.0710  | 0.0700  | 0.0710  | 0.0680  | 0.0690  | 0.0670  | 0.0670  | 0.0630  | 0.0560  | 0.0700  | 0.0660  | 0.0710  |
| fis           | 0.0500  | -0.1950 | 0.0540  | 0.0210  | 0.0390  | 0.0620  | 0.0370  | 0.0280  | 0.0170  | -0.0780 | -0.0560 | -0.0840 | -0.4200 | 0.0800  | 0.0210  | 0.0370  |
| hwe_glb       | 1.0000  | 1.0000  | 1.0000  | 1.0000  | 1.0000  | 1.0000  | 1.0000  | 1.0000  | 1.0000  | 1.0000  | 1.0000  | 1.0000  | 1.0000  | 1.0000  | 1.0000  | 1.0000  |
| hwe_hom       | 1.0000  | 1.0000  | 1.0000  | 1.0000  | 1.0000  | 1.0000  | 1.0000  | 1.0000  | 1.0000  | 1.0000  | 1.0000  | 1.0000  | 1.0000  | 1.0000  | 1.0000  | 1.0000  |
| hwe_het       | 1.0000  | 1.0000  | 1.0000  | 1.0000  | 1.0000  | 1.0000  | 1.0000  | 1.0000  | 1.0000  | 1.0000  | 1.0000  | 1.0000  | 1.0000  | 1.0000  | 1.0000  | 1.0000  |
| fis_lo        | -0.0220 | -1.0000 | -0.0150 | -0.0940 | -0.0790 | -0.0660 | -0.0600 | -0.0510 | -0.1690 | -0.3350 | -0.3090 | -0.4580 | -1.0000 | 0.0580  | -0.0710 | -0.0810 |
| fis_hi        | 0.0450  | -0.1950 | 0.0490  | 0.0150  | 0.0310  | 0.0570  | 0.0290  | 0.0170  | 0.0130  | -0.0780 | -0.0560 | -0.0840 | -0.4200 | 0.0820  | 0.0200  | 0.0260  |
| ar_lo         | 1.0170  | 0.9970  | 1.0130  | 1.0160  | 1.0370  | 0.9010  | 1.0320  | 1.0370  | 0.9570  | 1.0450  | 1.0350  | 1.0350  | 1.0380  | 1.0530  | 1.0380  | 0.9280  |
| ar_hi         | 1.0850  | 1.0770  | 1.0800  | 1.0870  | 1.1310  | 1.1230  | 1.1250  | 1.1240  | 1.1270  | 1.1230  | 1.1210  | 1.1260  | 1.0970  | 1.1290  | 1.1230  | 1.1230  |
| fis.hierfstat | 0.0936  | 0.0449  | 0.0984  | 0.0818  | 0.0920  | 0.1246  | 0.0907  | 0.0761  | 0.0977  | 0.0439  | 0.0655  | 0.0356  | -0.2143 | 0.0939  | 0.0653  | 0.0983  |
| fis.CI.low    | 0.1159  | 0.0766  | 0.1240  | 0.0964  | 0.1003  | 0.1669  | 0.1049  | 0.0844  | 0.1185  | 0.0455  | 0.0812  | 0.0359  | -0.2006 | 0.1174  | 0.0673  | 0.1138  |
| fis.CI.high   | 0.1781  | 0.2514  | 0.1894  | 0.1719  | 0.1583  | 0.2337  | 0.1634  | 0.1433  | 0.1907  | 0.1377  | 0.1707  | 0.1338  | -0.0408 | 0.1517  | 0.1230  | 0.1763  |

```

pop.levels <- c("Brazil","Caribbean Sea","Gulf of Mexico", "Western North Atlantic",
              "Sierra Leone", "South Africa", "Mozambique", "Reunion" , "Seychelles",
              "Arabian Sea", "Sri Lanka", "Thailand", "Indonesia", "Papua New Guinea",
              "Australia", "Japan", "Fiji")
BS.dartseq.baits.gl$pop <- factor(BS.dartseq.baits.gl$other$ind.metrics$Site,
                                levels = pop.levels)
BS.dartseq.baits.gl <- BS.dartseq.baits.gl[order(BS.dartseq.baits.gl$pop,
                                                BS.dartseq.baits.gl$ind.names)]

monomorphics <- c()
for (i in 1:length(pop.levels)) {
  x <- BS.dartseq.baits.gl[BS.dartseq.baits.gl$pop == pop.levels[i]]
  x2 <- dartR::gl.filter.monomorphs(x, verbose = 0)
  locs <- adegenet::nLoc(x) - adegenet::nLoc(x2)
  monomorphics[i] <- locs
}
names(monomorphics) <- pop.levels
shortnames <- c("BRZ", "CAR", "GOM", "WNA","SIL", "SAF", "MOZ", "RUN" , "SEY",
               "ARS", "SRL", "TAI", "IND", "PNG" , "AUS", "JAP", "FIJ")
knitr::kable(t(as.table(monomorphics)), col.names = shortnames, digits = 4,
             caption = "") %>%
  kableExtra::kable_styling(full_width = FALSE,font_size = 5,
                            latex_options = c( "hold_position"))

```

Table 8:

| BRZ  | CAR  | GOM  | WNA  | SIL  | SAF  | MOZ  | RUN  | SEY  | ARS  | SRL  | TAI  | IND  | PNG  | AUS  | JAP  | FIJ  |
|------|------|------|------|------|------|------|------|------|------|------|------|------|------|------|------|------|
| 2531 | 2966 | 2546 | 2610 | 3343 | 2426 | 2526 | 2458 | 2425 | 2616 | 2797 | 2798 | 2856 | 3143 | 1742 | 2429 | 2521 |

### 6.3.2.1 Number of monomorphic markers per population

```

pi.sum <- radiator::pi(
  data = BS.dartseq.baits.tidy,
  read.length = 70,
  parallel.core = parallel::detectCores() - 1,
  path.folder = NULL,
  verbose = TRUE
)

FIS.sum<- radiator::ibdg_fh(data = BS.dartseq.baits.tidy,
  path.folder = NULL, verbose = TRUE)

save(pi.sum, FIS.sum, file = "DARtcap_ALL_baits_pi_FIS_Sites2.Rdata")

load("DARtcap_ALL_pi_FIS_Sites2.Rdata")
pi.sum$boxplot.pi

```

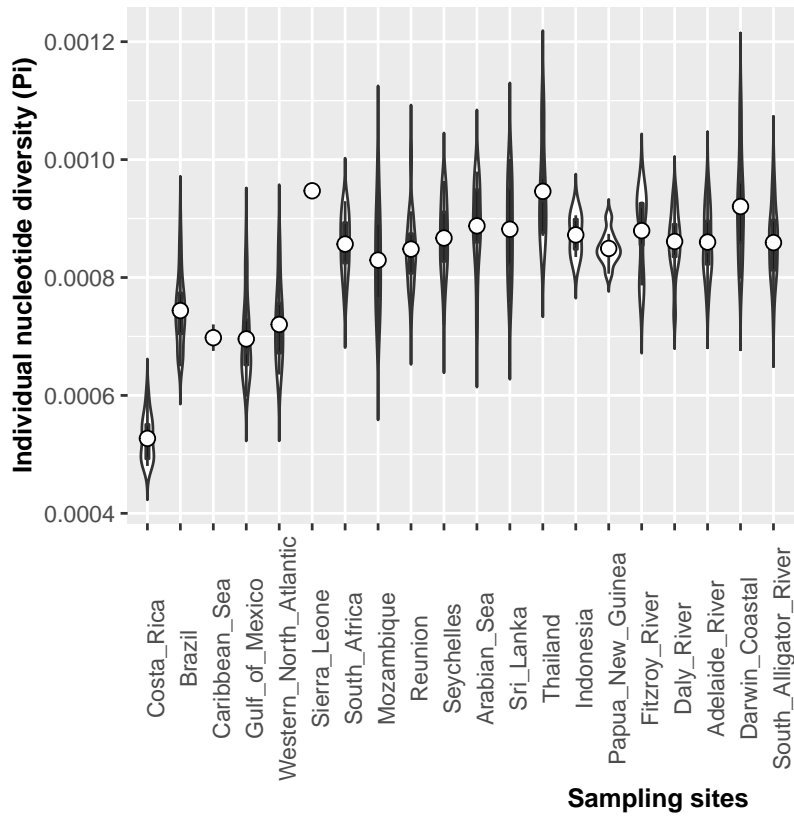

### 6.3.2.2 Nucleotide diversity and inbreeding

FIS.sum\$fh.box.plot

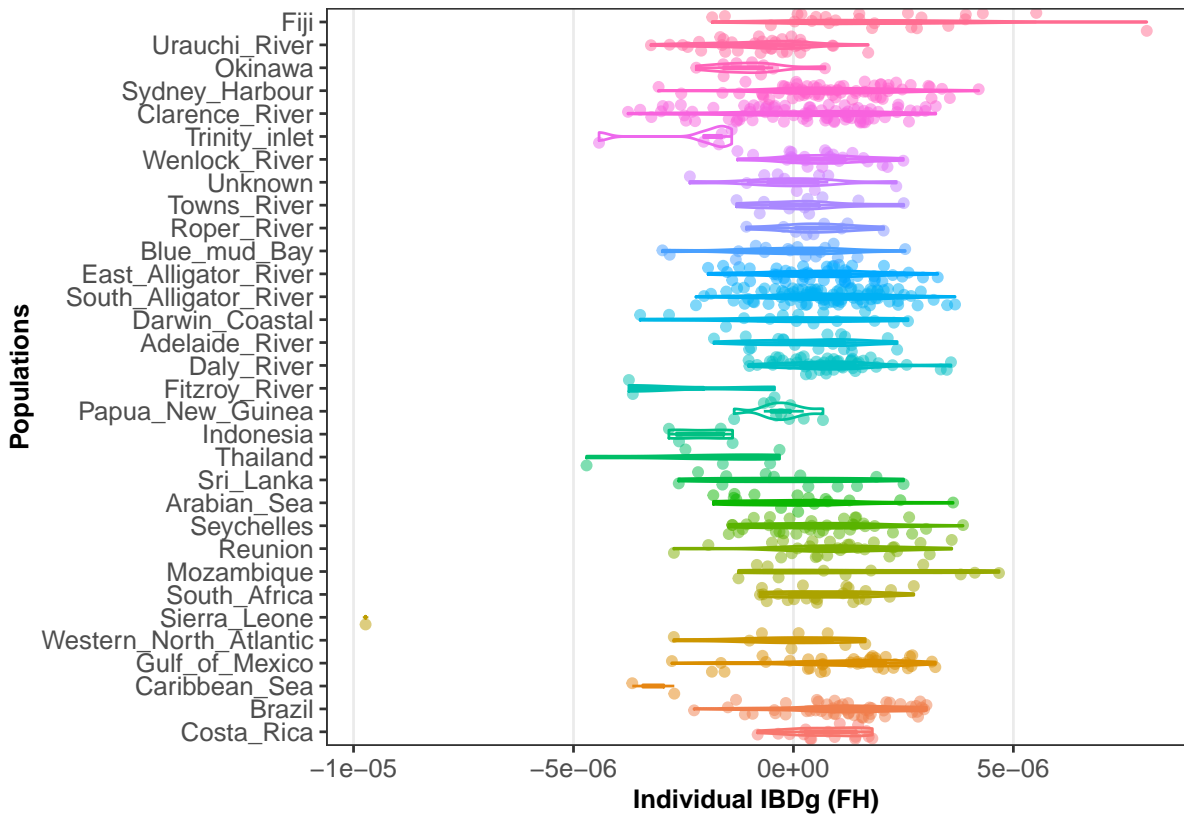

### 6.3.3 Genetic differentiation

```
strata <- as.character(BS.dartseq.baits.gt@schemes$Site)
names(strata) <- BS.dartseq.baits.gt@schemes$id
strataG::setStrata(BS.dartseq.baits.gt) <- strata

Fst.gt <- strataG::popStructTest(
  BS.dartseq.baits.gt,
  nrep = 1000,
  stats = "all",
  type = "pairwise",
  keep.null = FALSE,
  quietly = TRUE,
  nb.cores = parallel::detectCores() - 1,
  write.output = FALSE
)
save(Fst.gt, file = "DARtseq_ALL_baits_FST.Rdata")
readr::write_tsv(Fst.gt$pairwise$result, path = "DARtseq_ALL_baits_FST.txt")

load("DARtseq_ALL_baits_FST.Rdata")
kableExtra::kbl(Fst.gt$pairwise$result[order(Fst.gt$pairwise$result$Fst,
                                             decreasing = TRUE),
                                             -c(1:4)], digits = 4,
  caption = "Pairwise Fst for 3409 DARtseq baits between the all sites",
  longtable = TRUE, booktabs = T) %>%
  kableExtra::kable_styling(full_width = FALSE, font_size = 5,
    latex_options = c("repeat_header", "hold_position")) %>%
  kableExtra::landscape()
```

Table 9: Pairwise Fst for 3409 DArTseq baits between the all sites

|                                                    | Chi2       | Chi2.p.val | D      | D.p.val | Fis      | Fis.p.val | Fst    | Fst.p.val | F'st   | F'st.p.val | Gst     | Gst.p.val | G'st    | G'st.p.val | G''st  | G''st.p.val |
|----------------------------------------------------|------------|------------|--------|---------|----------|-----------|--------|-----------|--------|------------|---------|-----------|---------|------------|--------|-------------|
| Gulf of Mexico (11) v. Papua New Guinea (2)        | 8102.5340  | 0.0100     | 0.0101 | 0.0100  | NA       | NA        | 0.6089 | 0.2041    | 0.6433 | 0.2041     | NA      | NA        | NA      | NA         | NA     | NA          |
| Papua New Guinea (2) v. Western North Atlantic (8) | 6372.1345  | 0.0230     | 0.0103 | 0.0230  | NA       | NA        | 0.5985 | 0.1917    | NA     | NA         | NA      | NA        | NA      | NA         | NA     | NA          |
| Gulf of Mexico (11) v. Indonesia (4)               | 9532.0578  | 0.0030     | 0.0103 | 0.0030  | NA       | NA        | 0.5965 | 0.0043    | 0.6344 | 0.0043     | NA      | NA        | NA      | NA         | NA     | NA          |
| Gulf of Mexico (11) v. Thailand (4)                | 9686.5999  | 0.0020     | 0.0104 | 0.0020  | NA       | NA        | 0.5960 | 0.0026    | 0.6339 | 0.0026     | NA      | NA        | NA      | NA         | NA     | NA          |
| Gulf of Mexico (11) v. Sri Lanka (4)               | 9509.0294  | 0.0040     | 0.0100 | 0.0040  | NA       | NA        | 0.5872 | 0.0059    | 0.6231 | 0.0059     | NA      | NA        | NA      | NA         | NA     | NA          |
| Indonesia (4) v. Western North Atlantic (8)        | 7763.2194  | 0.0030     | 0.0104 | 0.0030  | NA       | NA        | 0.5870 | 0.0041    | 0.6357 | 0.0041     | NA      | NA        | NA      | NA         | NA     | NA          |
| Brazil (11) v. Indonesia (4)                       | 9236.5349  | 0.0020     | 0.0101 | 0.0020  | NA       | NA        | 0.5842 | 0.0023    | 0.6223 | 0.0023     | NA      | NA        | NA      | NA         | NA     | NA          |
| Thailand (4) v. Western North Atlantic (8)         | 7829.6372  | 0.0060     | 0.0104 | 0.0060  | NA       | NA        | 0.5842 | 0.0078    | 0.6334 | 0.0083     | NA      | NA        | NA      | NA         | NA     | NA          |
| Brazil (11) v. Thailand (4)                        | 9378.6255  | 0.0010     | 0.0101 | 0.0010  | NA       | NA        | 0.5828 | 0.0012    | 0.6208 | 0.0012     | NA      | NA        | NA      | NA         | NA     | NA          |
| Japan (11) v. Western North Atlantic (8)           | 12623.2524 | 0.0010     | 0.0116 | 0.0010  | NA       | NA        | 0.5824 | 0.0010    | 0.6272 | 0.0010     | NA      | NA        | NA      | NA         | NA     | NA          |
| Brazil (11) v. Japan (11)                          | 14386.7049 | 0.0010     | 0.0112 | 0.0010  | NA       | NA        | 0.5807 | 0.0010    | 0.6242 | 0.0010     | NA      | NA        | NA      | NA         | NA     | NA          |
| Sri Lanka (4) v. Western North Atlantic (8)        | 7713.8626  | 0.0030     | 0.0100 | 0.0030  | NA       | NA        | 0.5763 | 0.0047    | 0.6248 | 0.0053     | NA      | NA        | NA      | NA         | NA     | NA          |
| Arabian Sea (6) v. Gulf of Mexico (11)             | 10961.0694 | 0.0010     | 0.0101 | 0.0010  | NA       | NA        | 0.5759 | 0.0010    | 0.6230 | 0.0011     | NA      | NA        | NA      | NA         | NA     | NA          |
| Fiji (8) v. Gulf of Mexico (11)                    | 12403.9837 | 0.0010     | 0.0107 | 0.0010  | NA       | NA        | 0.5750 | 0.0010    | 0.6222 | 0.0010     | NA      | NA        | NA      | NA         | NA     | NA          |
| Brazil (11) v. Sri Lanka (4)                       | 9218.8942  | 0.0010     | 0.0098 | 0.0010  | NA       | NA        | 0.5739 | 0.0014    | 0.6099 | 0.0014     | NA      | NA        | NA      | NA         | NA     | NA          |
| Gulf of Mexico (11) v. Reunion (9)                 | 13151.6388 | 0.0010     | 0.0108 | 0.0010  | NA       | NA        | 0.5708 | 0.0010    | NA     | NA         | NA      | NA        | NA      | NA         | NA     | NA          |
| Gulf of Mexico (11) v. Seychelles (10)             | 13436.3933 | 0.0010     | 0.0104 | 0.0010  | NA       | NA        | 0.5684 | 0.0010    | NA     | NA         | NA      | NA        | NA      | NA         | NA     | NA          |
| Gulf of Mexico (11) v. Mozambique (8)              | 11723.3601 | 0.0010     | 0.0103 | 0.0010  | NA       | NA        | 0.5680 | 0.0010    | NA     | NA         | NA      | NA        | NA      | NA         | NA     | NA          |
| Brazil (11) v. Fiji (8)                            | 12117.7180 | 0.0010     | 0.0105 | 0.0010  | NA       | NA        | 0.5640 | 0.0010    | 0.6163 | 0.0010     | NA      | NA        | NA      | NA         | NA     | NA          |
| Arabian Sea (6) v. Brazil (11)                     | 10647.2547 | 0.0010     | 0.0098 | 0.0010  | NA       | NA        | 0.5639 | 0.0010    | 0.6109 | 0.0011     | NA      | NA        | NA      | NA         | NA     | NA          |
| Arabian Sea (6) v. Western North Atlantic (8)      | 9079.0498  | 0.0010     | 0.0102 | 0.0010  | NA       | NA        | 0.5639 | 0.0011    | 0.6112 | 0.0011     | NA      | NA        | NA      | NA         | NA     | NA          |
| Fiji (8) v. Western North Atlantic (8)             | 10387.0276 | 0.0020     | 0.0108 | 0.0020  | NA       | NA        | 0.5629 | 0.0025    | 0.6101 | 0.0025     | NA      | NA        | NA      | NA         | NA     | NA          |
| Caribbean Sea (2) v. Papua New Guinea (2)          | 2790.0714  | 0.3467     | 0.0099 | 0.3467  | NA       | NA        | 0.5614 | 0.3467    | 0.6059 | 0.3467     | NA      | NA        | NA      | NA         | NA     | NA          |
| Brazil (11) v. Reunion (9)                         | 12855.1300 | 0.0010     | 0.0106 | 0.0010  | NA       | NA        | 0.5601 | 0.0010    | 0.6077 | 0.0010     | NA      | NA        | NA      | NA         | NA     | NA          |
| Reunion (9) v. Western North Atlantic (8)          | 11106.9875 | 0.0010     | 0.0109 | 0.0010  | NA       | NA        | 0.5593 | 0.0010    | 0.6058 | 0.0010     | NA      | NA        | NA      | NA         | NA     | NA          |
| Brazil (11) v. Seychelles (10)                     | 13186.7411 | 0.0010     | 0.0102 | 0.0010  | NA       | NA        | 0.5580 | 0.0010    | 0.6036 | 0.0010     | NA      | NA        | NA      | NA         | NA     | NA          |
| Seychelles (10) v. Western North Atlantic (8)      | 11468.7198 | 0.0010     | 0.0105 | 0.0010  | NA       | NA        | 0.5580 | 0.0010    | 0.6030 | 0.0010     | NA      | NA        | NA      | NA         | NA     | NA          |
| Brazil (11) v. Mozambique (8)                      | 11470.4265 | 0.0010     | 0.0101 | 0.0010  | NA       | NA        | 0.5572 | 0.0010    | NA     | NA         | NA      | NA        | NA      | NA         | NA     | NA          |
| Brazil (11) v. South Africa (9)                    | 12589.1098 | 0.0010     | 0.0099 | 0.0010  | NA       | NA        | 0.5559 | 0.0010    | NA     | NA         | NA      | NA        | NA      | NA         | NA     | NA          |
| Mozambique (8) v. Western North Atlantic (8)       | 9811.4527  | 0.0030     | 0.0104 | 0.0030  | NA       | NA        | 0.5557 | 0.0031    | 0.6040 | 0.0031     | NA      | NA        | NA      | NA         | NA     | NA          |
| Caribbean Sea (2) v. Indonesia (4)                 | 3907.0225  | 0.0609     | 0.0102 | 0.0609  | NA       | NA        | 0.5553 | 1.0000    | NA     | NA         | NA      | NA        | NA      | NA         | NA     | NA          |
| South Africa (9) v. Western North Atlantic (8)     | 10865.6475 | 0.0010     | 0.0101 | 0.0010  | NA       | NA        | 0.5550 | 0.0010    | 0.6007 | 0.0010     | NA      | NA        | NA      | NA         | NA     | NA          |
| Caribbean Sea (2) v. Thailand (4)                  | 3880.0798  | 0.0689     | 0.0101 | 0.0689  | NA       | NA        | 0.5384 | 0.3670    | 0.5877 | 0.5433     | NA      | NA        | NA      | NA         | NA     | NA          |
| Australia (34) v. Gulf of Mexico (11)              | 26372.2394 | 0.0010     | 0.0104 | 0.0010  | NA       | NA        | 0.5380 | 0.0010    | 0.5800 | 0.0010     | NA      | NA        | NA      | NA         | NA     | NA          |
| Caribbean Sea (2) v. Sri Lanka (4)                 | 3833.6746  | 0.0749     | 0.0097 | 0.0749  | NA       | NA        | 0.5343 | 0.1820    | 0.5785 | 0.5474     | NA      | NA        | NA      | NA         | NA     | NA          |
| Australia (34) v. Western North Atlantic (8)       | 24019.0389 | 0.0010     | 0.0105 | 0.0010  | NA       | NA        | 0.5321 | 0.0011    | 0.5738 | 0.0011     | NA      | NA        | NA      | NA         | NA     | NA          |
| Australia (34) v. Brazil (11)                      | 25908.7124 | 0.0010     | 0.0102 | 0.0010  | NA       | NA        | 0.5298 | 0.0010    | 0.5714 | 0.0010     | NA      | NA        | NA      | NA         | NA     | NA          |
| Caribbean Sea (2) v. Seychelles (10)               | 6931.6802  | 0.0120     | 0.0101 | 0.0120  | NA       | NA        | 0.5239 | 0.1121    | NA     | NA         | NA      | NA        | NA      | NA         | NA     | NA          |
| Caribbean Sea (2) v. Fiji (8)                      | 5943.5605  | 0.0230     | 0.0105 | 0.0230  | NA       | NA        | 0.5210 | 0.0271    | NA     | NA         | NA      | NA        | NA      | NA         | NA     | NA          |
| Arabian Sea (6) v. Caribbean Sea (2)               | 4912.1344  | 0.0390     | 0.0098 | 0.0390  | NA       | NA        | 0.5185 | 0.1418    | 0.5600 | 0.1418     | NA      | NA        | NA      | NA         | NA     | NA          |
| Caribbean Sea (2) v. Reunion (9)                   | 6511.0696  | 0.0170     | 0.0105 | 0.0170  | NA       | NA        | 0.5178 | 0.4146    | NA     | NA         | NA      | NA        | NA      | NA         | NA     | NA          |
| Caribbean Sea (2) v. Mozambique (8)                | 5511.7323  | 0.0170     | 0.0101 | 0.0170  | NA       | NA        | 0.5124 | 1.0000    | NA     | NA         | NA      | NA        | NA      | NA         | NA     | NA          |
| Australia (34) v. Caribbean Sea (2)                | 17826.7556 | 0.0030     | 0.0102 | 0.0030  | NA       | NA        | 0.5097 | 0.2727    | 0.5486 | 0.2727     | NA      | NA        | NA      | NA         | NA     | NA          |
| Papua New Guinea (2) v. Sierra Leone (1)           | 869.8667   | 0.3327     | 0.0008 | 0.3327  | NA       | NA        | 0.1103 | 0.3327    | 0.1184 | 0.3327     | NA      | NA        | NA      | NA         | NA     | NA          |
| Indonesia (4) v. Japan (11)                        | 1900.8212  | 0.0010     | 0.0004 | 0.0010  | NA       | NA        | 0.0777 | 0.0010    | NA     | NA         | NA      | NA        | NA      | NA         | NA     | NA          |
| Fiji (8) v. Japan (11)                             | 2290.7442  | 0.0010     | 0.0003 | 0.0010  | -23.8431 | 1.0000    | 0.0641 | 0.0010    | 0.0698 | 0.0011     | 0.4458  | 0.0012    | 0.4713  | 0.0012     | 0.6343 | 0.0012      |
| Fiji (8) v. Indonesia (4)                          | 1659.3082  | 0.0020     | 0.0004 | 0.0020  | NA       | NA        | 0.0595 | 0.0021    | 0.0647 | 0.0021     | NA      | NA        | NA      | NA         | NA     | NA          |
| Indonesia (4) v. Papua New Guinea (2)              | 1051.8778  | 0.2108     | 0.0005 | 0.2108  | NA       | NA        | 0.0537 | 0.1734    | 0.0579 | 0.1734     | NA      | NA        | NA      | NA         | NA     | NA          |
| Japan (11) v. Sri Lanka (4)                        | 1678.9484  | 0.0010     | 0.0003 | 0.0140  | NA       | NA        | 0.0492 | 0.0050    | 0.0529 | 0.0053     | NA      | NA        | NA      | NA         | NA     | NA          |
| Japan (11) v. Thailand (4)                         | 1683.9072  | 0.0030     | 0.0003 | 0.0080  | NA       | NA        | 0.0468 | 0.0150    | 0.0504 | 0.0164     | NA      | NA        | NA      | NA         | NA     | NA          |
| Japan (11) v. Mozambique (8)                       | 1958.8523  | 0.0010     | 0.0003 | 0.0010  | NA       | NA        | 0.0462 | 0.0010    | 0.0523 | 0.0012     | NA      | NA        | NA      | NA         | NA     | NA          |
| Indonesia (4) v. Thailand (4)                      | 1197.2271  | 0.0559     | 0.0003 | 0.1469  | 13.5058  | 0.9760    | 0.0458 | 0.0559    | 0.0498 | 0.0559     | 29.4957 | 0.0345    | 25.9063 | 0.0345     | 1.8167 | 0.0345      |
| Japan (11) v. Papua New Guinea (2)                 | 1417.8562  | 0.0430     | 0.0004 | 0.0659  | NA       | NA        | 0.0432 | 0.0994    | 0.0464 | 0.0994     | NA      | NA        | NA      | NA         | NA     | NA          |

Table 9: Pairwise Fst for 3409 DArTseq baits between the all sites (continued)

|                                                   | Chi2      | Chi2.p.val | D      | D.p.val | Fis      | Fis.p.val | Fst     | Fst.p.val | F'st    | F'st.p.val | Gst    | Gst.p.val | G'st   | G'st.p.val | G''st  | G''st.p.val |
|---------------------------------------------------|-----------|------------|--------|---------|----------|-----------|---------|-----------|---------|------------|--------|-----------|--------|------------|--------|-------------|
| Japan (11) v. South Africa (9)                    | 2001.5867 | 0.0010     | 0.0002 | 0.0010  | NA       | NA        | 0.0405  | 0.0010    | 0.0442  | 0.0019     | NA     | NA        | NA     | NA         | NA     | NA          |
| Fiji (8) v. Seychelles (10)                       | 2046.0674 | 0.0020     | 0.0002 | 0.0030  | -21.7300 | 1.0000    | 0.0395  | 0.0021    | 0.0434  | 0.0021     | 0.4257 | 0.0021    | 0.4515 | 0.0021     | 0.6152 | 0.0021      |
| Arabian Sea (6) v. Japan (11)                     | 1790.6767 | 0.0010     | 0.0002 | 0.0010  | NA       | NA        | 0.0381  | 0.0010    | 0.0415  | 0.0019     | NA     | NA        | NA     | NA         | NA     | NA          |
| Japan (11) v. Reunion (9)                         | 2005.6853 | 0.0010     | 0.0003 | 0.0010  | -20.2818 | 0.9955    | 0.0374  | 0.0011    | 0.0409  | 0.0011     | 0.3750 | 0.0022    | 0.3999 | 0.0022     | 0.5636 | 0.0022      |
| Japan (11) v. Seychelles (10)                     | 2009.7485 | 0.0010     | 0.0002 | 0.0010  | NA       | NA        | 0.0360  | 0.0010    | 0.0393  | 0.0012     | NA     | NA        | NA     | NA         | NA     | NA          |
| Fiji (8) v. Mozambique (8)                        | 1891.5201 | 0.0010     | 0.0003 | 0.0010  | -34.8132 | 0.9978    | 0.0358  | 0.0010    | 0.0413  | 0.0011     | 0.5894 | 0.0011    | 0.6124 | 0.0011     | 0.7561 | 0.0011      |
| Indonesia (4) v. Mozambique (8)                   | 1451.4379 | 0.0270     | 0.0003 | 0.0509  | NA       | NA        | 0.0344  | 0.0270    | 0.0183  | NA         | NA     | NA        | NA     | NA         | NA     | NA          |
| Fiji (8) v. Thailand (4)                          | 1527.9697 | 0.0070     | 0.0003 | 0.0090  | NA       | NA        | 0.0336  | 0.0078    | 0.0365  | 0.0079     | NA     | NA        | NA     | NA         | NA     | NA          |
| Indonesia (4) v. Seychelles (10)                  | 1509.6262 | 0.0150     | 0.0003 | 0.0170  | NA       | NA        | 0.0333  | 0.0101    | NA      | NA         | NA     | NA        | NA     | NA         | NA     | NA          |
| Australia (34) v. Fiji (8)                        | 3012.8187 | 0.0010     | 0.0002 | 0.0010  | -9.1806  | 0.9909    | 0.0328  | 0.0013    | 0.0357  | 0.0013     | 0.1827 | 0.0013    | 0.2022 | 0.0013     | 0.3254 | 0.0013      |
| Fiji (8) v. Sri Lanka (4)                         | 1519.3088 | 0.0060     | 0.0003 | 0.0060  | NA       | NA        | 0.0325  | 0.0063    | 0.0352  | 0.0069     | NA     | NA        | NA     | NA         | NA     | NA          |
| Australia (34) v. Japan (11)                      | 2806.5855 | 0.0010     | 0.0002 | 0.0010  | -9.1646  | 1.0000    | 0.0324  | 0.0010    | 0.0350  | 0.0010     | 0.1477 | 0.0015    | 0.1638 | 0.0015     | 0.2714 | 0.0015      |
| Fiji (8) v. South Africa (9)                      | 1921.1801 | 0.0010     | 0.0002 | 0.0010  | NA       | NA        | 0.0307  | 0.0010    | 0.0338  | 0.0011     | NA     | NA        | NA     | NA         | NA     | NA          |
| Fiji (8) v. Reunion (9)                           | 1952.9401 | 0.0010     | 0.0002 | 0.0010  | -22.7665 | 1.0000    | 0.0306  | 0.0010    | 0.0338  | 0.0010     | 0.4456 | 0.0010    | 0.4716 | 0.0010     | 0.6345 | 0.0010      |
| Indonesia (4) v. Sri Lanka (4)                    | 1130.9851 | 0.1888     | 0.0002 | 0.1588  | NA       | NA        | 0.0294  | 0.1588    | NA      | NA         | NA     | NA        | NA     | NA         | NA     | NA          |
| Australia (34) v. Indonesia (4)                   | 2314.2974 | 0.0010     | 0.0002 | 0.0010  | NA       | NA        | 0.0280  | 0.0011    | 0.0302  | 0.0011     | NA     | NA        | NA     | NA         | NA     | NA          |
| Arabian Sea (6) v. Indonesia (4)                  | 1292.8201 | 0.0839     | 0.0003 | 0.0859  | NA       | NA        | 0.0262  | 0.0967    | 0.0285  | 0.1067     | NA     | NA        | NA     | NA         | NA     | NA          |
| Indonesia (4) v. South Africa (9)                 | 1474.5715 | 0.0270     | 0.0002 | 0.1409  | 81.9077  | 0.9967    | 0.0260  | 0.0142    | 0.0288  | 0.0153     | 1.2958 | 0.0077    | 1.2727 | 0.0077     | 1.1188 | 0.0077      |
| Arabian Sea (6) v. Fiji (8)                       | 1629.1213 | 0.0020     | 0.0002 | 0.0040  | -57.6854 | 0.9706    | 0.0217  | 0.0020    | 0.0243  | 0.0025     | 0.7147 | 0.0240    | 0.7322 | 0.0240     | 0.8438 | 0.0240      |
| Sri Lanka (4) v. Thailand (4)                     | 1107.5346 | 0.0210     | 0.0002 | 0.0849  | NA       | NA        | 0.0124  | 0.0839    | 0.0135  | 0.0591     | NA     | NA        | NA     | NA         | NA     | NA          |
| Australia (34) v. Mozambique (8)                  | 2276.3729 | 0.0060     | 0.0001 | 0.5115  | -10.0857 | 1.0000    | 0.0120  | 0.0018    | 0.0132  | 0.0018     | 0.2040 | 0.0018    | 0.2242 | 0.0018     | 0.3556 | 0.0018      |
| Mozambique (8) v. South Africa (9)                | 1594.8721 | 0.0260     | 0.0002 | 0.0150  | NA       | NA        | 0.0086  | 0.0270    | 0.0095  | 0.0227     | NA     | NA        | NA     | NA         | NA     | NA          |
| Australia (34) v. Sri Lanka (4)                   | 2030.6818 | 0.1818     | 0.0001 | 0.6024  | -18.2684 | 0.7222    | 0.0078  | 0.0812    | 0.0084  | 0.0812     | 0.4224 | 0.3137    | 0.4472 | 0.3235     | 0.6114 | 0.3235      |
| South Africa (9) v. Sri Lanka (4)                 | 1397.1209 | 0.1329     | 0.0002 | 0.0100  | NA       | NA        | 0.0076  | 0.1418    | NA      | NA         | NA     | NA        | NA     | NA         | NA     | NA          |
| Seychelles (10) v. Sri Lanka (4)                  | 1374.9997 | 0.1209     | 0.0002 | 0.2158  | NA       | NA        | 0.0071  | 0.1636    | 0.0076  | 0.1604     | NA     | NA        | NA     | NA         | NA     | NA          |
| Reunion (9) v. Seychelles (10)                    | 1565.7084 | 0.0759     | 0.0001 | 0.0220  | -19.6474 | 0.7569    | 0.0067  | 0.0921    | 0.0074  | 0.0921     | 0.3668 | 0.1410    | 0.3917 | 0.1398     | 0.5550 | 0.1398      |
| Caribbean Sea (2) v. Gulf of Mexico (11)          | 981.1163  | 0.0869     | 0.0001 | 0.3277  | NA       | NA        | 0.0062  | 0.2432    | NA      | NA         | NA     | NA        | NA     | NA         | NA     | NA          |
| Seychelles (10) v. South Africa (9)               | 1590.4783 | 0.0929     | 0.0001 | 0.0040  | NA       | NA        | 0.0056  | 0.1139    | 0.0061  | 0.1196     | NA     | NA        | NA     | NA         | NA     | NA          |
| Mozambique (8) v. Sri Lanka (4)                   | 1294.3686 | 0.3127     | 0.0002 | 0.1419  | NA       | NA        | 0.0056  | 0.2304    | 0.0060  | 0.2382     | NA     | NA        | NA     | NA         | NA     | NA          |
| Mozambique (8) v. Seychelles (10)                 | 1553.9683 | 0.1269     | 0.0001 | 0.4156  | NA       | NA        | 0.0042  | 0.1998    | 0.0046  | 0.2159     | NA     | NA        | NA     | NA         | NA     | NA          |
| Mozambique (8) v. Thailand (4)                    | 1279.2778 | 0.4456     | 0.0002 | 0.2358  | NA       | NA        | 0.0039  | 0.2745    | 0.0043  | 0.2714     | NA     | NA        | NA     | NA         | NA     | NA          |
| Gulf of Mexico (11) v. Western North Atlantic (8) | 1150.4714 | 0.1019     | 0.0000 | 0.1349  | NA       | NA        | 0.0039  | 0.1556    | NA      | NA         | NA     | NA        | NA     | NA         | NA     | NA          |
| Australia (34) v. Reunion (9)                     | 2090.7826 | 0.1758     | 0.0001 | 0.2268  | -8.9360  | 0.1864    | 0.0036  | 0.0833    | 0.0040  | 0.0833     | 0.1479 | 0.3111    | 0.1644 | 0.2853     | 0.2721 | 0.2995      |
| Seychelles (10) v. Thailand (4)                   | 1308.7435 | 0.3596     | 0.0002 | 0.1928  | NA       | NA        | 0.0036  | 0.2876    | 0.0039  | 0.3096     | NA     | NA        | NA     | NA         | NA     | NA          |
| Brazil (11) v. Western North Atlantic (8)         | 1174.3975 | 0.1608     | 0.0000 | 0.3377  | NA       | NA        | 0.0027  | 0.2397    | NA      | NA         | NA     | NA        | NA     | NA         | NA     | NA          |
| Australia (34) v. South Africa (9)                | 2305.7262 | 0.0030     | 0.0001 | 0.0849  | NA       | NA        | 0.0025  | 0.1309    | 0.0027  | 0.1310     | NA     | NA        | NA     | NA         | NA     | NA          |
| Australia (34) v. Seychelles (10)                 | 2176.7156 | 0.0420     | 0.0001 | 0.0350  | -8.6955  | 0.9422    | 0.0020  | 0.1359    | 0.0022  | 0.1361     | 0.1355 | 0.0766    | 0.1507 | 0.0797     | 0.2521 | 0.0797      |
| Reunion (9) v. Sri Lanka (4)                      | 1309.9356 | 0.3127     | 0.0002 | 0.1638  | 123.7838 | 0.6395    | 0.0016  | 0.3636    | 0.0018  | 0.3636     | 1.1848 | 0.3416    | 1.1707 | 0.3416     | 1.0781 | 0.3416      |
| Australia (34) v. Thailand (4)                    | 1935.2647 | 0.4885     | 0.0001 | 0.6274  | NA       | NA        | 0.0008  | 0.3957    | 0.0009  | 0.3951     | NA     | NA        | NA     | NA         | NA     | NA          |
| Mozambique (8) v. Reunion (9)                     | 1478.8841 | 0.3816     | 0.0001 | 0.2977  | -29.0749 | 1.0000    | 0.0005  | 0.4842    | 0.0005  | 0.4842     | 0.5147 | 0.0011    | 0.5388 | 0.0011     | 0.6955 | 0.0011      |
| Brazil (11) v. Gulf of Mexico (11)                | 1208.1742 | 0.2987     | 0.0000 | 0.1798  | NA       | NA        | 0.0004  | 0.4380    | 0.0004  | 0.4758     | NA     | NA        | NA     | NA         | NA     | NA          |
| Arabian Sea (6) v. Australia (34)                 | 2043.3687 | 0.2957     | 0.0000 | 0.9960  | -11.2122 | 0.5175    | 0.0003  | 0.4555    | 0.0003  | 0.4577     | 0.2357 | 0.4330    | 0.2572 | 0.4412     | 0.3989 | 0.4371      |
| Arabian Sea (6) v. South Africa (9)               | 1424.3239 | 0.5145     | 0.0001 | 0.3057  | NA       | NA        | 0.0002  | 0.4975    | 0.0003  | 0.5249     | NA     | NA        | NA     | NA         | NA     | NA          |
| South Africa (9) v. Thailand (4)                  | 1269.4545 | 0.8352     | 0.0002 | 0.4356  | 106.7048 | 0.4233    | -0.0012 | 0.5501    | -0.0013 | 0.5501     | 1.2200 | 0.5300    | 1.2033 | 0.5276     | 1.0916 | 0.5264      |
| Caribbean Sea (2) v. Western North Atlantic (8)   | 805.3188  | 0.7173     | 0.0001 | 0.3816  | NA       | NA        | -0.0015 | 0.5933    | NA      | NA         | NA     | NA        | NA     | NA         | NA     | NA          |
| Arabian Sea (6) v. Sri Lanka (4)                  | 1145.9785 | 0.8292     | 0.0002 | 0.3387  | NA       | NA        | -0.0047 | 0.7815    | -0.0051 | 0.7753     | NA     | NA        | NA     | NA         | NA     | NA          |
| Arabian Sea (6) v. Seychelles (10)                | 1400.2838 | 0.5425     | 0.0001 | 0.9261  | NA       | NA        | -0.0049 | 0.8142    | -0.0054 | 0.8054     | NA     | NA        | NA     | NA         | NA     | NA          |
| Arabian Sea (6) v. Reunion (9)                    | 1333.2114 | 0.6194     | 0.0001 | 0.5774  | -41.6492 | 0.3902    | -0.0057 | 0.7993    | -0.0063 | 0.7975     | 0.6194 | 0.6545    | 0.6404 | 0.6590     | 0.7779 | 0.6579      |
| Arabian Sea (6) v. Thailand (4)                   | 1115.7016 | 0.9660     | 0.0001 | 0.9451  | NA       | NA        | -0.0062 | 0.8847    | -0.0067 | 0.8951     | NA     | NA        | NA     | NA         | NA     | NA          |
| Arabian Sea (6) v. Mozambique (8)                 | 1279.5434 | 0.9840     | 0.0001 | 0.9720  | NA       | NA        | -0.0107 | 0.9736    | -0.0124 | 0.9853     | NA     | NA        | NA     | NA         | NA     | NA          |
| Arabian Sea (6) v. Papua New Guinea (2)           | 1029.1868 | 0.8621     | 0.0003 | 0.7962  | NA       | NA        | -0.0137 | 0.9339    | -0.0148 | 0.9339     | NA     | NA        | NA     | NA         | NA     | NA          |
| Mozambique (8) v. Papua New Guinea (2)            | 1064.4045 | 0.8751     | 0.0003 | 0.6214  | NA       | NA        | -0.0199 | 1.0000    | -0.0216 | 1.0000     | NA     | NA        | NA     | NA         | NA     | NA          |
| Arabian Sea (6) v. Sierra Leone (1)               | 1366.8318 | 0.1439     | 0.0008 | 0.3047  | NA       | NA        | NA      | NA        | NA      | NA         | NA     | NA        | NA     | NA         | NA     | NA          |

Table 9: Pairwise Fst for 3409 DArTseq baits between the all sites (continued)

|                                                | Chi2       | Chi2.p.val | D      | D.p.val | Fis | Fis.p.val | Fst | Fst.p.val | F'st | F'st.p.val | Gst | Gst.p.val | G'st | G'st.p.val | G''st | G''st.p.val |
|------------------------------------------------|------------|------------|--------|---------|-----|-----------|-----|-----------|------|------------|-----|-----------|------|------------|-------|-------------|
| Australia (34) v. Papua New Guinea (2)         | 1696.0948  | 0.9181     | 0.0002 | 0.7053  | NA  | NA        | NA  | NA        | NA   | NA         | NA  | NA        | NA   | NA         | NA    | NA          |
| Australia (34) v. Sierra Leone (1)             | 3623.3691  | 0.0290     | 0.0008 | 0.0290  | NA  | NA        | NA  | NA        | NA   | NA         | NA  | NA        | NA   | NA         | NA    | NA          |
| Brazil (11) v. Caribbean Sea (2)               | 875.3034   | 0.8432     | 0.0001 | 0.4276  | NA  | NA        | NA  | NA        | NA   | NA         | NA  | NA        | NA   | NA         | NA    | NA          |
| Brazil (11) v. Papua New Guinea (2)            | 7747.9949  | 0.0130     | 0.0099 | 0.0130  | NA  | NA        | NA  | NA        | NA   | NA         | NA  | NA        | NA   | NA         | NA    | NA          |
| Brazil (11) v. Sierra Leone (1)                | 6002.3001  | 0.0919     | 0.0065 | 0.0919  | NA  | NA        | NA  | NA        | NA   | NA         | NA  | NA        | NA   | NA         | NA    | NA          |
| Caribbean Sea (2) v. Japan (11)                | 7843.8015  | 0.0110     | 0.0112 | 0.0110  | NA  | NA        | NA  | NA        | NA   | NA         | NA  | NA        | NA   | NA         | NA    | NA          |
| Caribbean Sea (2) v. Sierra Leone (1)          | 1968.9750  | 0.3516     | 0.0064 | 0.3516  | NA  | NA        | NA  | NA        | NA   | NA         | NA  | NA        | NA   | NA         | NA    | NA          |
| Caribbean Sea (2) v. South Africa (9)          | 6487.9082  | 0.0130     | 0.0099 | 0.0130  | NA  | NA        | NA  | NA        | NA   | NA         | NA  | NA        | NA   | NA         | NA    | NA          |
| Fiji (8) v. Papua New Guinea (2)               | 1236.9172  | 0.2418     | 0.0004 | 0.0709  | NA  | NA        | NA  | NA        | NA   | NA         | NA  | NA        | NA   | NA         | NA    | NA          |
| Fiji (8) v. Sierra Leone (1)                   | 1668.9862  | 0.0879     | 0.0010 | 0.0879  | NA  | NA        | NA  | NA        | NA   | NA         | NA  | NA        | NA   | NA         | NA    | NA          |
| Gulf of Mexico (11) v. Japan (11)              | 14700.8676 | 0.0010     | 0.0114 | 0.0010  | NA  | NA        | NA  | NA        | NA   | NA         | NA  | NA        | NA   | NA         | NA    | NA          |
| Gulf of Mexico (11) v. Sierra Leone (1)        | 6326.3966  | 0.0769     | 0.0065 | 0.0769  | NA  | NA        | NA  | NA        | NA   | NA         | NA  | NA        | NA   | NA         | NA    | NA          |
| Gulf of Mexico (11) v. South Africa (9)        | 12895.7845 | 0.0010     | 0.0101 | 0.0010  | NA  | NA        | NA  | NA        | NA   | NA         | NA  | NA        | NA   | NA         | NA    | NA          |
| Indonesia (4) v. Reunion (9)                   | 1491.6003  | 0.0280     | 0.0003 | 0.0230  | NA  | NA        | NA  | NA        | NA   | NA         | NA  | NA        | NA   | NA         | NA    | NA          |
| Indonesia (4) v. Sierra Leone (1)              | 1182.9341  | 0.2208     | 0.0008 | 0.2208  | NA  | NA        | NA  | NA        | NA   | NA         | NA  | NA        | NA   | NA         | NA    | NA          |
| Japan (11) v. Sierra Leone (1)                 | 2129.3009  | 0.0879     | 0.0010 | 0.0879  | NA  | NA        | NA  | NA        | NA   | NA         | NA  | NA        | NA   | NA         | NA    | NA          |
| Mozambique (8) v. Sierra Leone (1)             | 1552.4615  | 0.1139     | 0.0009 | 0.1139  | NA  | NA        | NA  | NA        | NA   | NA         | NA  | NA        | NA   | NA         | NA    | NA          |
| Papua New Guinea (2) v. Reunion (9)            | 1132.4893  | 0.8432     | 0.0003 | 0.4246  | NA  | NA        | NA  | NA        | NA   | NA         | NA  | NA        | NA   | NA         | NA    | NA          |
| Papua New Guinea (2) v. Seychelles (10)        | 1233.2102  | 0.4236     | 0.0003 | 0.4216  | NA  | NA        | NA  | NA        | NA   | NA         | NA  | NA        | NA   | NA         | NA    | NA          |
| Papua New Guinea (2) v. South Africa (9)       | 1088.8191  | 0.9790     | 0.0002 | 0.9031  | NA  | NA        | NA  | NA        | NA   | NA         | NA  | NA        | NA   | NA         | NA    | NA          |
| Papua New Guinea (2) v. Sri Lanka (4)          | 906.5828   | 0.4565     | 0.0003 | 0.3187  | NA  | NA        | NA  | NA        | NA   | NA         | NA  | NA        | NA   | NA         | NA    | NA          |
| Papua New Guinea (2) v. Thailand (4)           | 899.6582   | 0.8062     | 0.0003 | 0.4665  | NA  | NA        | NA  | NA        | NA   | NA         | NA  | NA        | NA   | NA         | NA    | NA          |
| Reunion (9) v. Sierra Leone (1)                | 1677.6190  | 0.0969     | 0.0009 | 0.0969  | NA  | NA        | NA  | NA        | NA   | NA         | NA  | NA        | NA   | NA         | NA    | NA          |
| Reunion (9) v. South Africa (9)                | 1586.2125  | 0.0799     | 0.0001 | 0.0160  | NA  | NA        | NA  | NA        | NA   | NA         | NA  | NA        | NA   | NA         | NA    | NA          |
| Reunion (9) v. Thailand (4)                    | 1307.6413  | 0.3137     | 0.0002 | 0.2308  | NA  | NA        | NA  | NA        | NA   | NA         | NA  | NA        | NA   | NA         | NA    | NA          |
| Seychelles (10) v. Sierra Leone (1)            | 1803.8697  | 0.0859     | 0.0008 | 0.0859  | NA  | NA        | NA  | NA        | NA   | NA         | NA  | NA        | NA   | NA         | NA    | NA          |
| Sierra Leone (1) v. South Africa (9)           | 1691.0264  | 0.0929     | 0.0008 | 0.0929  | NA  | NA        | NA  | NA        | NA   | NA         | NA  | NA        | NA   | NA         | NA    | NA          |
| Sierra Leone (1) v. Sri Lanka (4)              | 1113.7442  | 0.2068     | 0.0008 | 0.2068  | NA  | NA        | NA  | NA        | NA   | NA         | NA  | NA        | NA   | NA         | NA    | NA          |
| Sierra Leone (1) v. Thailand (4)               | 1135.4761  | 0.2068     | 0.0008 | 0.2068  | NA  | NA        | NA  | NA        | NA   | NA         | NA  | NA        | NA   | NA         | NA    | NA          |
| Sierra Leone (1) v. Western North Atlantic (8) | 4968.4411  | 0.1059     | 0.0066 | 0.1059  | NA  | NA        | NA  | NA        | NA   | NA         | NA  | NA        | NA   | NA         | NA    | NA          |

### 6.3.4 PCA

```

pca1 <- adegenet::glPca(BS.dartseq.baits.gl, nf = 5, parallel = TRUE,
                       n.cores = parallel::detectCores() - 1)
save(pca1, file = "DARtseq_ALL_baits_PCA.Rdata")

load("DARtseq_ALL_baits_PCA.Rdata")
pop.levels <- c("Costa Rica", "Brazil", "Caribbean Sea", "Gulf of Mexico",
               "Western North Atlantic", "Sierra Leone", "South Africa",
               "Mozambique", "Reunion", "Seychelles", "Arabian Sea", "Sri Lanka",
               "Thailand", "Indonesia", "Papua New Guinea", "Australia",
               "Japan", "Fiji")
BS.dartseq.baits.gl$pop <- factor(BS.dartseq.baits.gl$other$ind.metrics$Site,
                                 levels = pop.levels)

BS.pca.scores <- as.data.frame(pca1$scores)
BS.pca.scores$pop <- pop(BS.dartseq.baits.gl)
cols <- adegenet::funky(nPop(BS.dartseq.baits.gl))

p <- ggplot2::ggplot(BS.pca.scores, ggplot2::aes(x = PC1, y = PC2, colour = pop)) +
  ggplot2::geom_point(size = 2) + ggplot2::scale_color_manual(values = cols) +
  ggplot2::geom_hline(yintercept = 0) + ggplot2::geom_vline(xintercept = 0) +
  ggplot2::theme_minimal() +
  ggplot2::theme(
    axis.text = ggplot2::element_text(size = 5),
    axis.title.x = ggplot2::element_text(size = 10),
    axis.title.y = ggplot2::element_text(size = 10),
    legend.text = ggplot2::element_text(size = 7)
  )

```

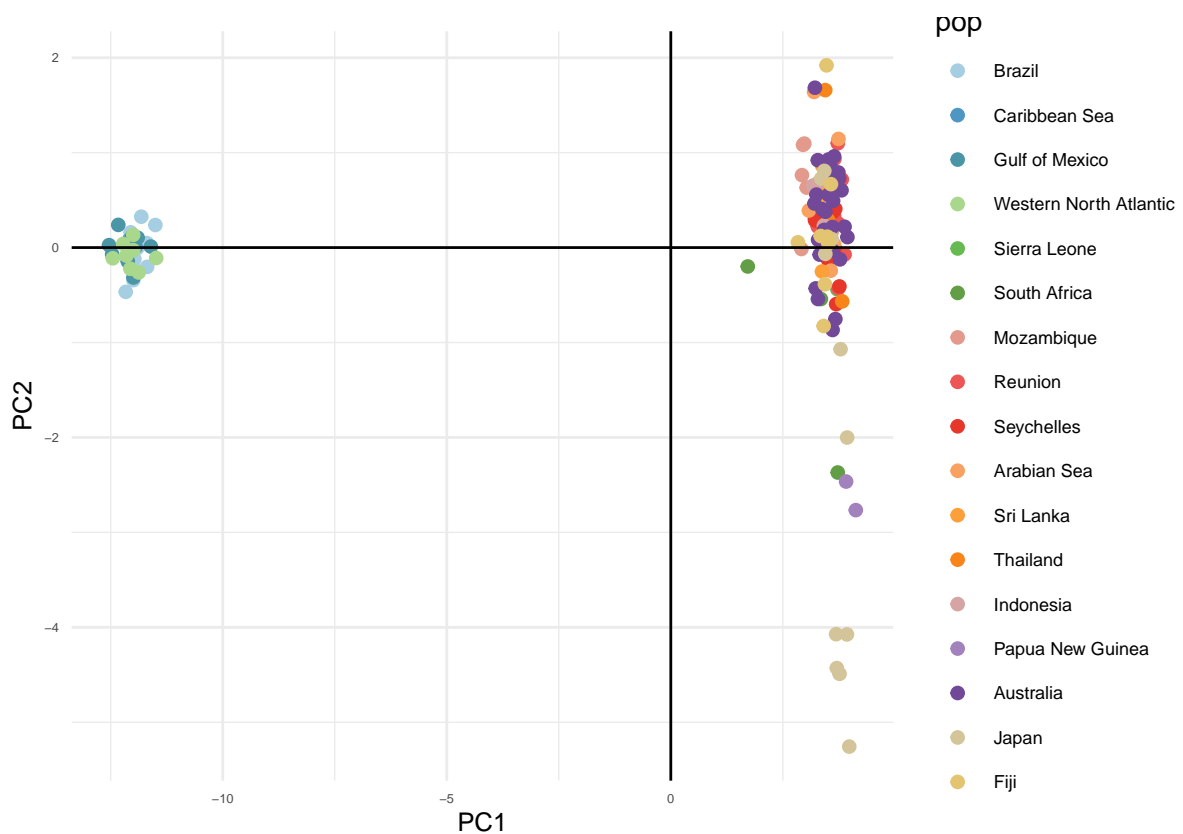



```
ggplot2::ggsave(p, filename = "DARtseq_ALL_baits_PCA1.png", width = 30,
               height = 15, units = "cm")
```

```
p <-
ggplot2::ggplot(BS.pca.scores, ggplot2::aes(x = PC1, y = PC3, colour = pop)) +
ggplot2::geom_point(size = 2) + ggplot2::scale_color_manual(values = cols) +
ggplot2::geom_hline(yintercept = 0) + ggplot2::geom_vline(xintercept = 0) +
ggplot2::theme_minimal() +
ggplot2::theme(
  axis.text = ggplot2::element_text(size = 5),
  axis.title.x = ggplot2::element_text(size = 10),
  axis.title.y = ggplot2::element_text(size = 10),
  legend.text = ggplot2::element_text(size = 7)
)
p
```

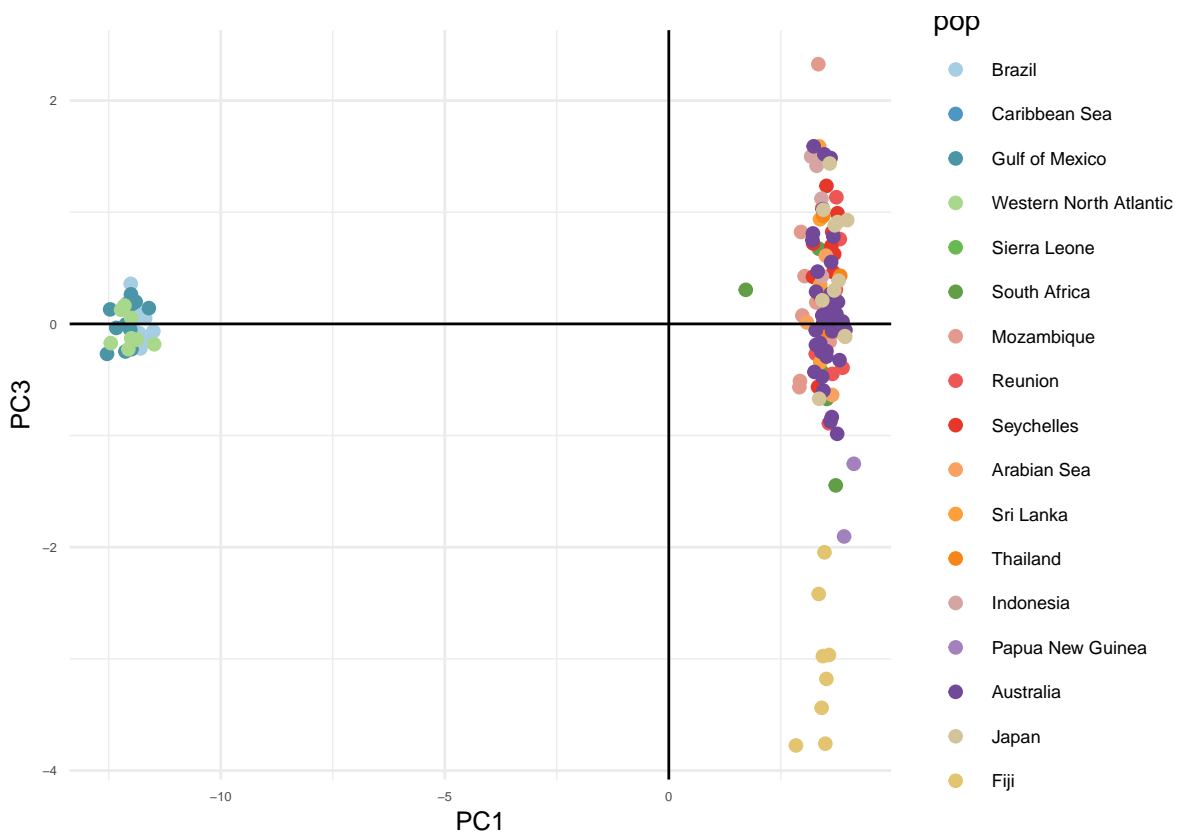

```
ggplot2::ggsave(p, filename = "DARtseq_ALL_baits_PCA2.png", width = 30,
               height = 15, units = "cm")
```

```
p <-
ggplot2::ggplot(BS.pca.scores, ggplot2::aes(x = PC2, y = PC3, colour = pop)) +
ggplot2::geom_point(size = 2) + ggplot2::scale_color_manual(values = cols) +
ggplot2::geom_hline(yintercept = 0) + ggplot2::geom_vline(xintercept = 0) +
ggplot2::theme_minimal() +
ggplot2::theme(
  axis.text = ggplot2::element_text(size = 5),
  axis.title.x = ggplot2::element_text(size = 10),
  axis.title.y = ggplot2::element_text(size = 10),
  legend.text = ggplot2::element_text(size = 7)
)
p
```

p

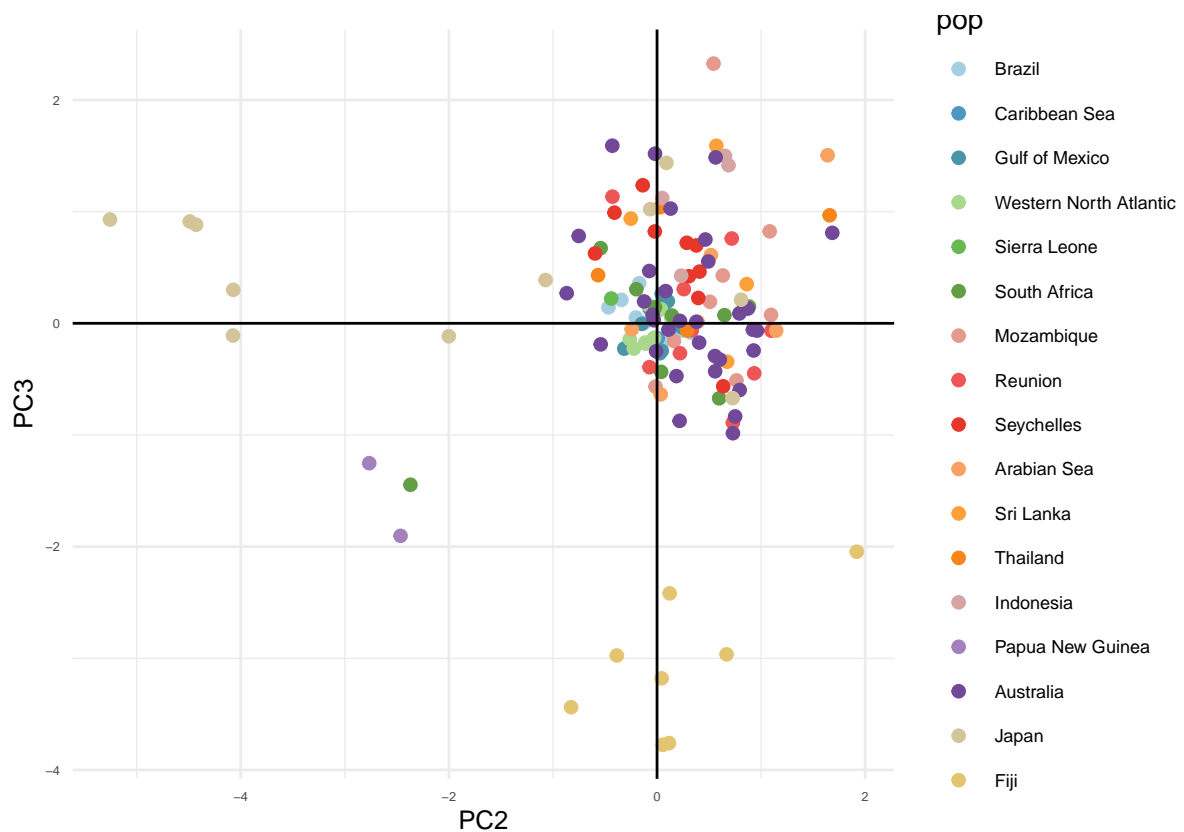

```
ggplot2::ggsave(p, filename = "DArTseq_ALL_baits_PCA3.png", width = 30,  
                height = 15, units = "cm")
```

```
p <-  
ggplot2::ggplot(BS.pca.scores, ggplot2::aes(x = PC3, y = PC4, colour = pop)) +  
ggplot2::geom_point(size = 2) + ggplot2::scale_color_manual(values = cols) +  
ggplot2::geom_hline(yintercept = 0) + ggplot2::geom_vline(xintercept = 0) +  
ggplot2::theme_minimal() +  
ggplot2::theme(  
  axis.text = ggplot2::element_text(size = 5),  
  axis.title.x = ggplot2::element_text(size = 10),  
  axis.title.y = ggplot2::element_text(size = 10),  
  legend.text = ggplot2::element_text(size = 7)  
)
```

p

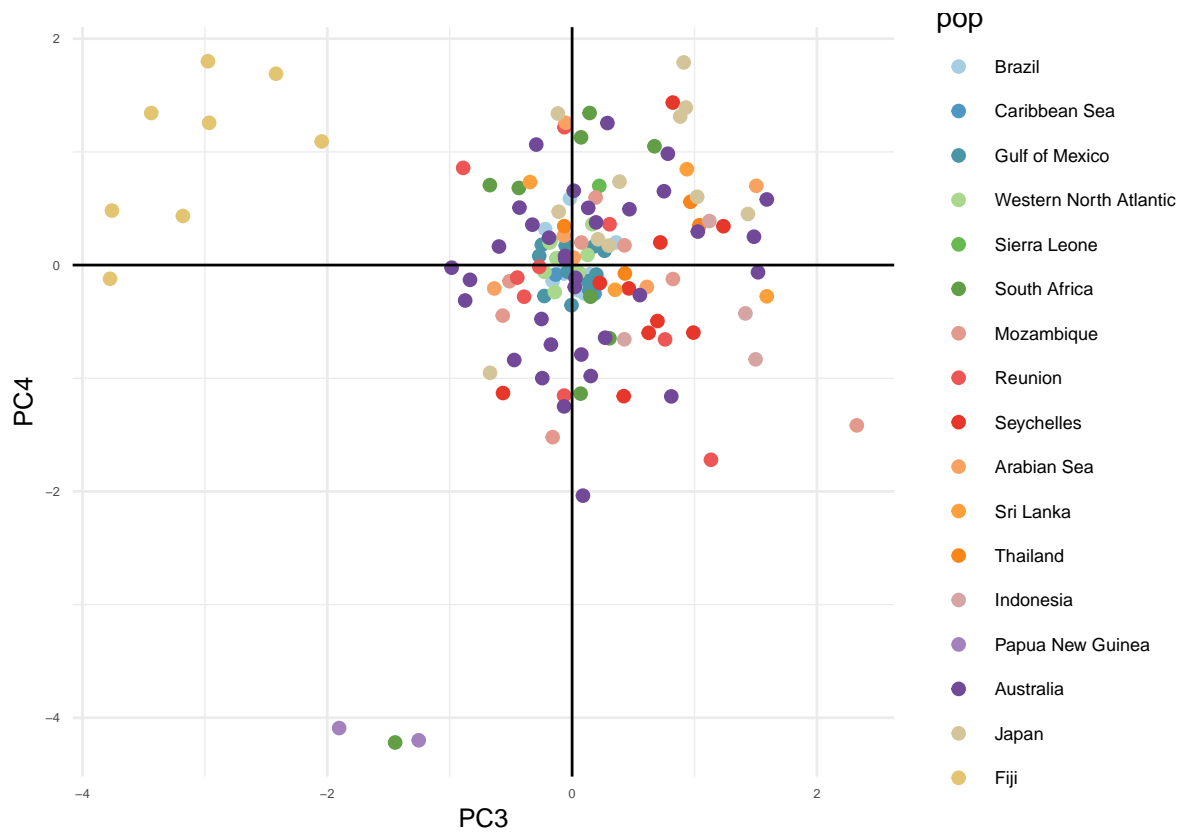

```
ggplot2::ggsave(p, filename = "DArTseq_ALL_baits_PCA4.png", width = 30,
  height = 15, units = "cm")
```

```
p <-
ggplot2::ggplot(BS.pca.scores, ggplot2::aes(x = PC3, y = PC5, colour = pop)) +
ggplot2::geom_point(size = 2) + ggplot2::scale_color_manual(values = cols) +
ggplot2::geom_hline(yintercept = 0) + ggplot2::geom_vline(xintercept = 0) +
ggplot2::theme_minimal() +
ggplot2::theme(
  axis.text = ggplot2::element_text(size = 5),
  axis.title.x = ggplot2::element_text(size = 10),
  axis.title.y = ggplot2::element_text(size = 10),
  legend.text = ggplot2::element_text(size = 7)
)
p
```

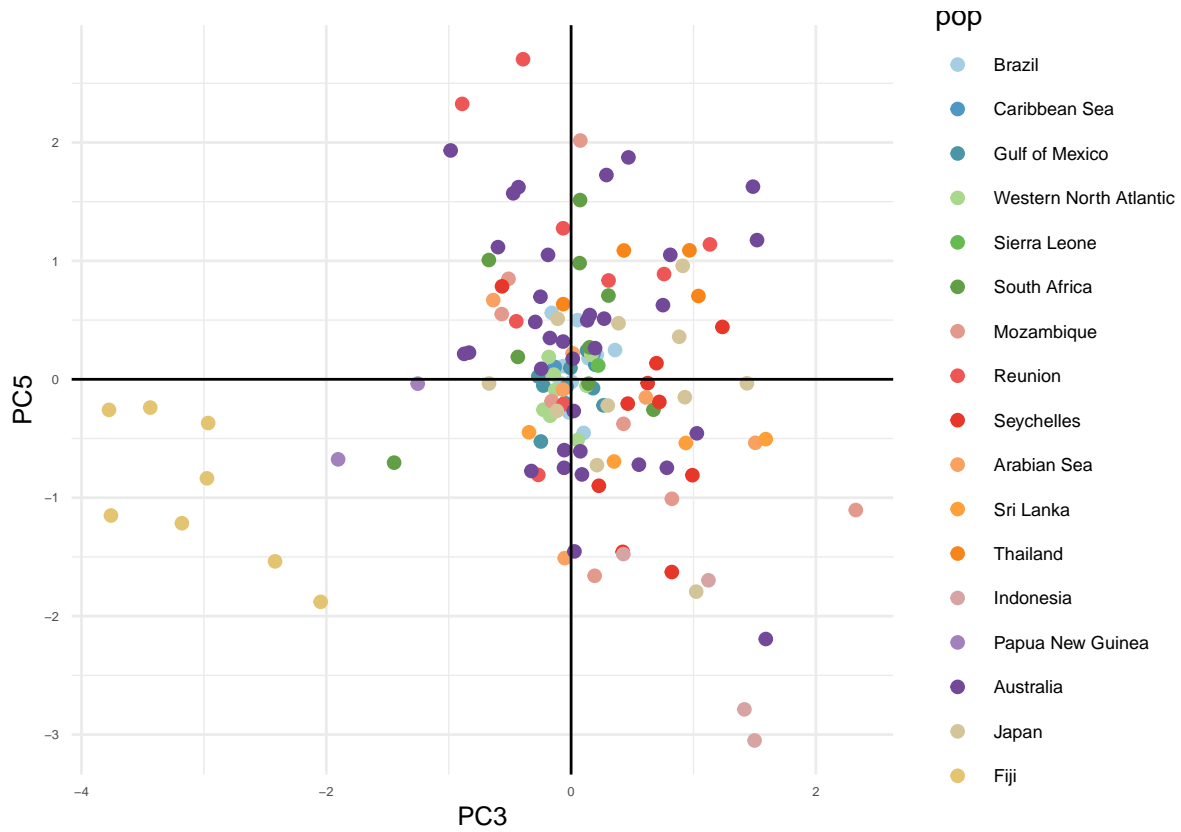

```
ggplot2::ggsave(p, filename = "DArTseq_ALL_baits_PCA5.png", width = 30,
  height = 15, units = "cm")
```

## 7 DATA1: DArTcap - All data

5 samples failed library construction

### 7.1 Set strata

```
targetid <- readr::read_tsv("DARtcap_target_id.tsv")

strata <- readr::read_csv(metafile) %>%
  dplyr::left_join(targetid, by = "INDIVIDUALS") %>%
  dplyr::filter(!is.na(TARGET_ID)) %>%
  dplyr::mutate(STRATA = Site2)
strata$INDIVIDUALS <- with(strata, make.unique(as.character(INDIVIDUALS)))
# readr::write_tsv(strata, path = "Bull_shark_DARtcap_strata.tsv")
```

### 7.2 Test baiting success

```
baits <- readr::read_tsv("Total_selected_markers.tsv")

dartcap.data <- "SEQ_SNPs_counts_0_Target_merge.csv"
strata <- "Bull_shark_DARtcap_strata.tsv"
BSsnp <- radiator::read_dart(data = dartcap.data, strata = strata, tidy.dart = TRUE,
                             parallel.core = parallel::detectCores() - 1)
BS.dartcap.raw.tidy <- BSsnp$tidy.data
length(unique(BS.dartcap.raw.tidy$INDIVIDUALS)) #942
length(unique(BS.dartcap.raw.tidy$MARKERS)) #19549
save(BSsnp, file = "DARtcap_Raw_tidy.Rdata")
sum(unique(baits$CloneID) %in% unique(BS.dartcap.raw.tidy$LOCUS)) #453
```

### 7.3 Find sex-linked markers

```
data <- "SEQ_SNPs_counts_0_Target_merge.csv"
silicodata <- NULL
strata <- radiator::read_strata("Bull_shark_DARtcap_strata.tsv",
                               keep.two = FALSE)$strata
strata %<>% dplyr::rename(POP = "STRATA") %>%
  dplyr::rename(STRATA = "Sex")

sex.results <- radiator::sexy_markers(
  data = data,
  silicodata = silicodata,
  strata = strata,
  interactive.filter = TRUE)
```

## Individual's QC stats

Missing genotypes outlier: 0.26892325

n. het markers in the bp range = 4435

n. het markers in the bp IQR = 109

### Correlations:

total coverage & missing =  $-0.02$

total coverage & mean coverage =  $0.82$

total coverage & heterozygosity =  $0.03$

missing & heterozygosity =  $-0.14$

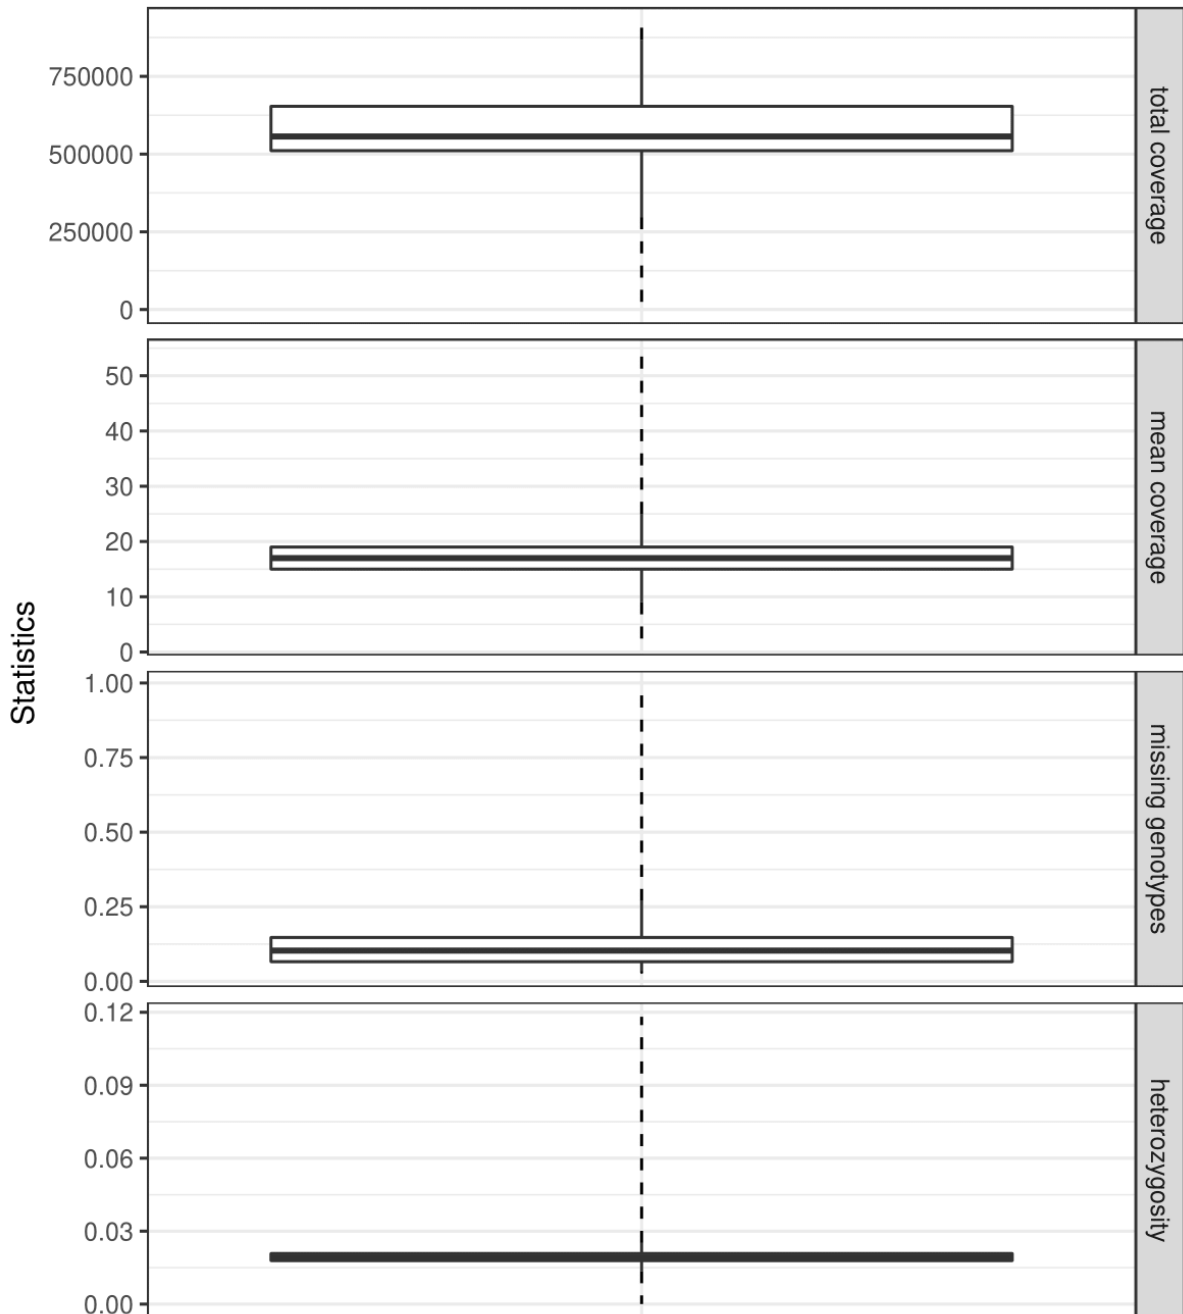

## Absence of each SNP marker between females and males

Sex is visually assigned

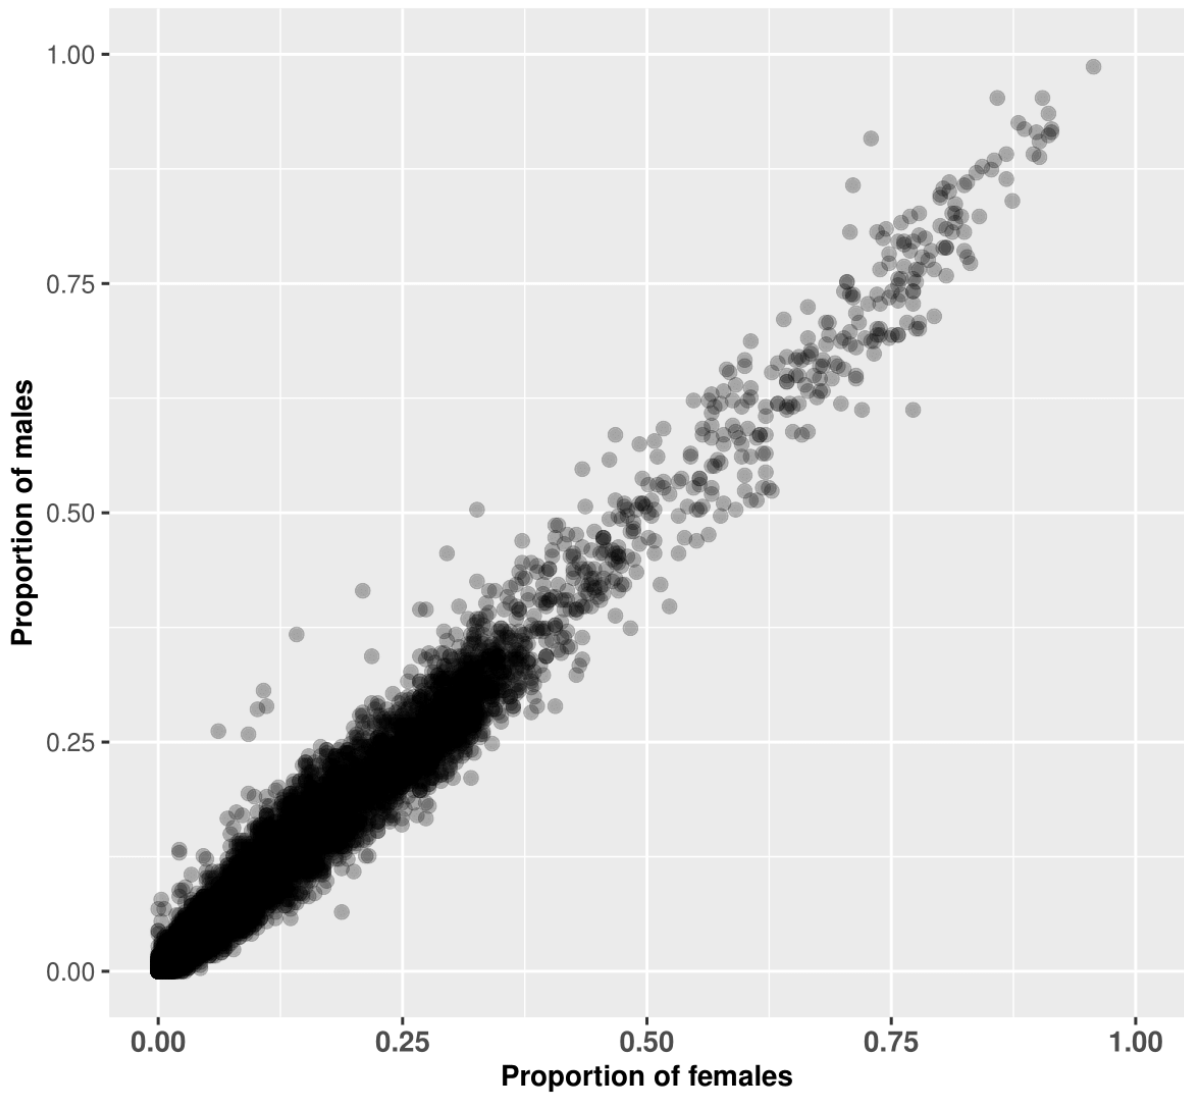

# Tukey mean-difference plot of each SNP marker between females and males

Sex is visually assigned

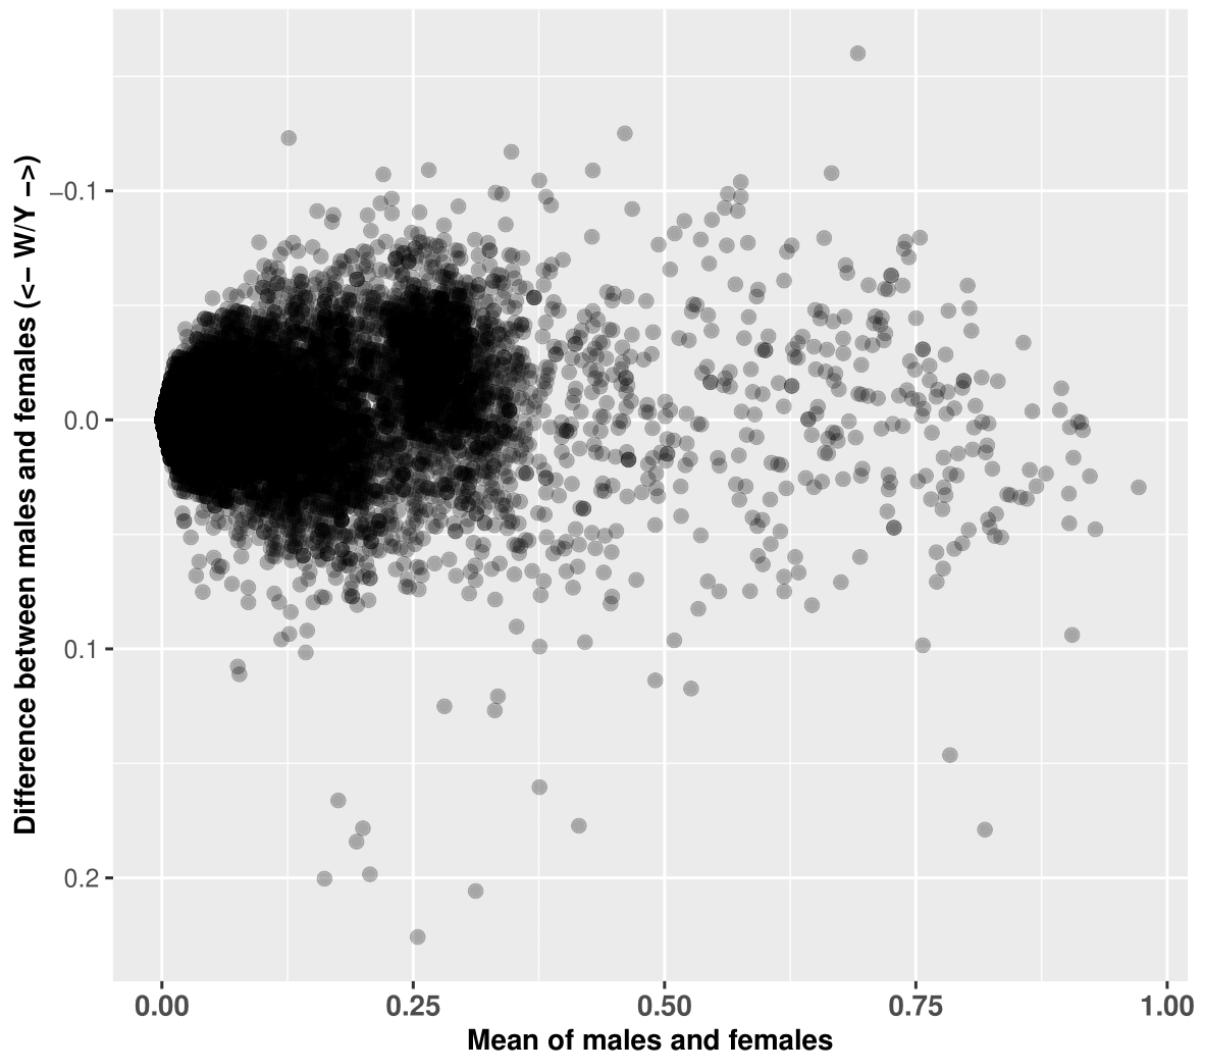



# Heterozygosity of each SNP marker between females and males

Sex is visually assigned

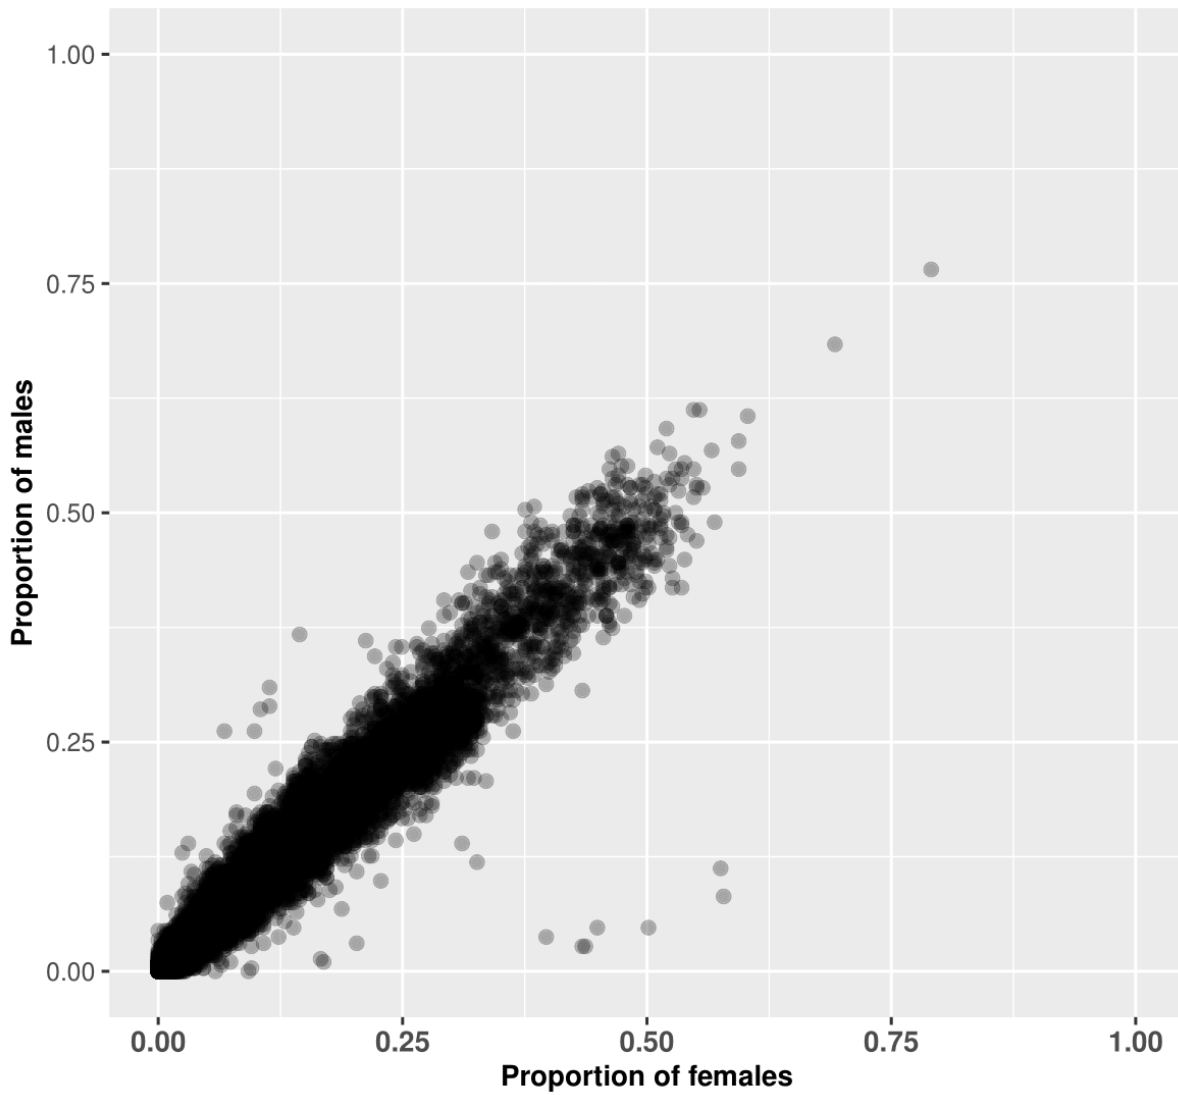

# Quantile residual plot of each SNP marker between females and males

Sex is visually assigned; tau = 0.03

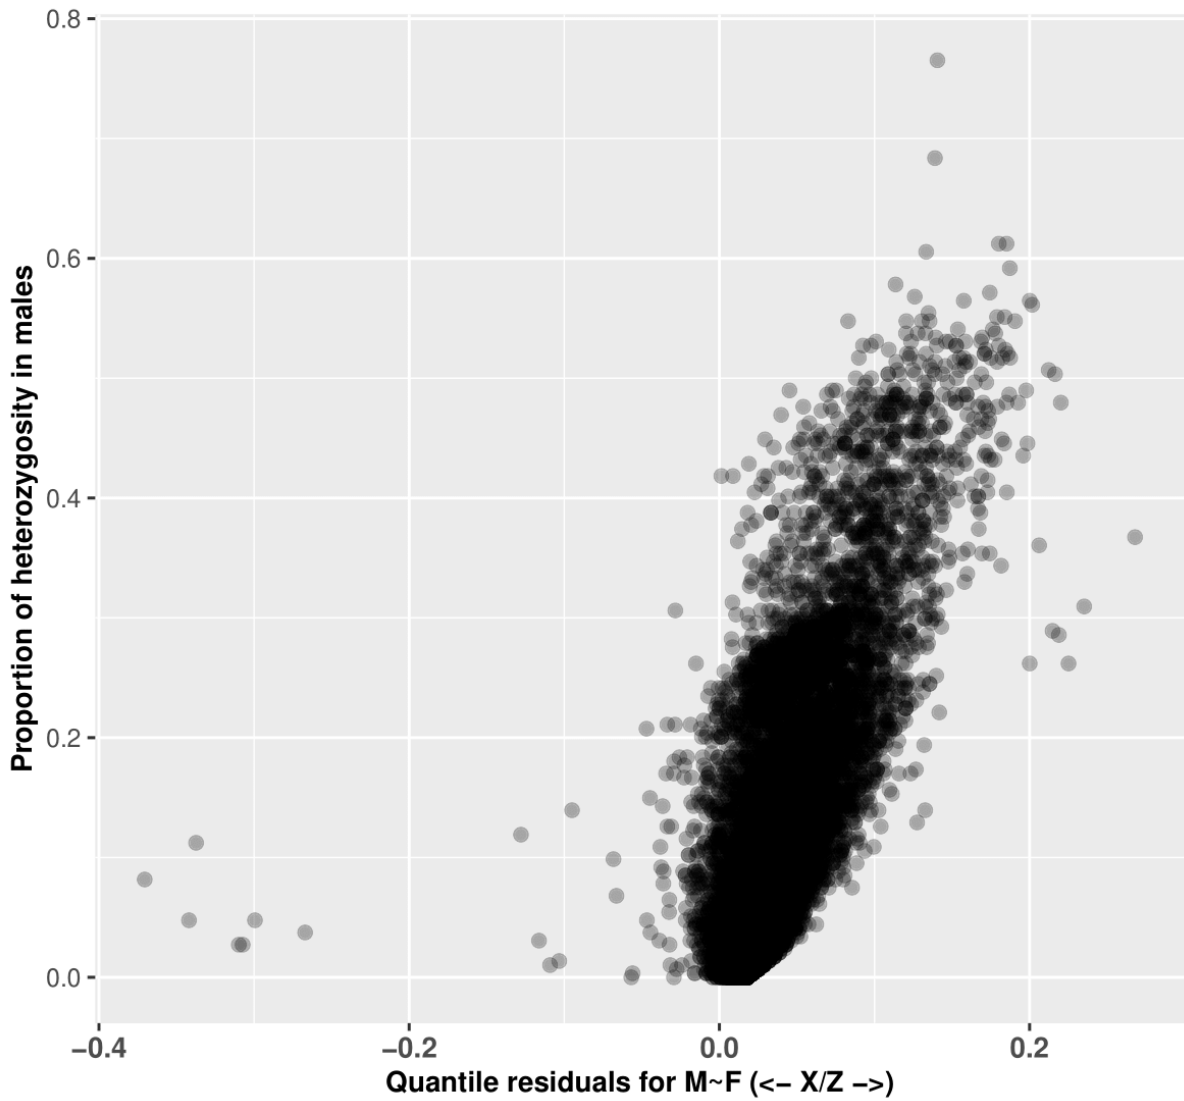

# Average coverage of each marker between females and males

Sex is visually assigned

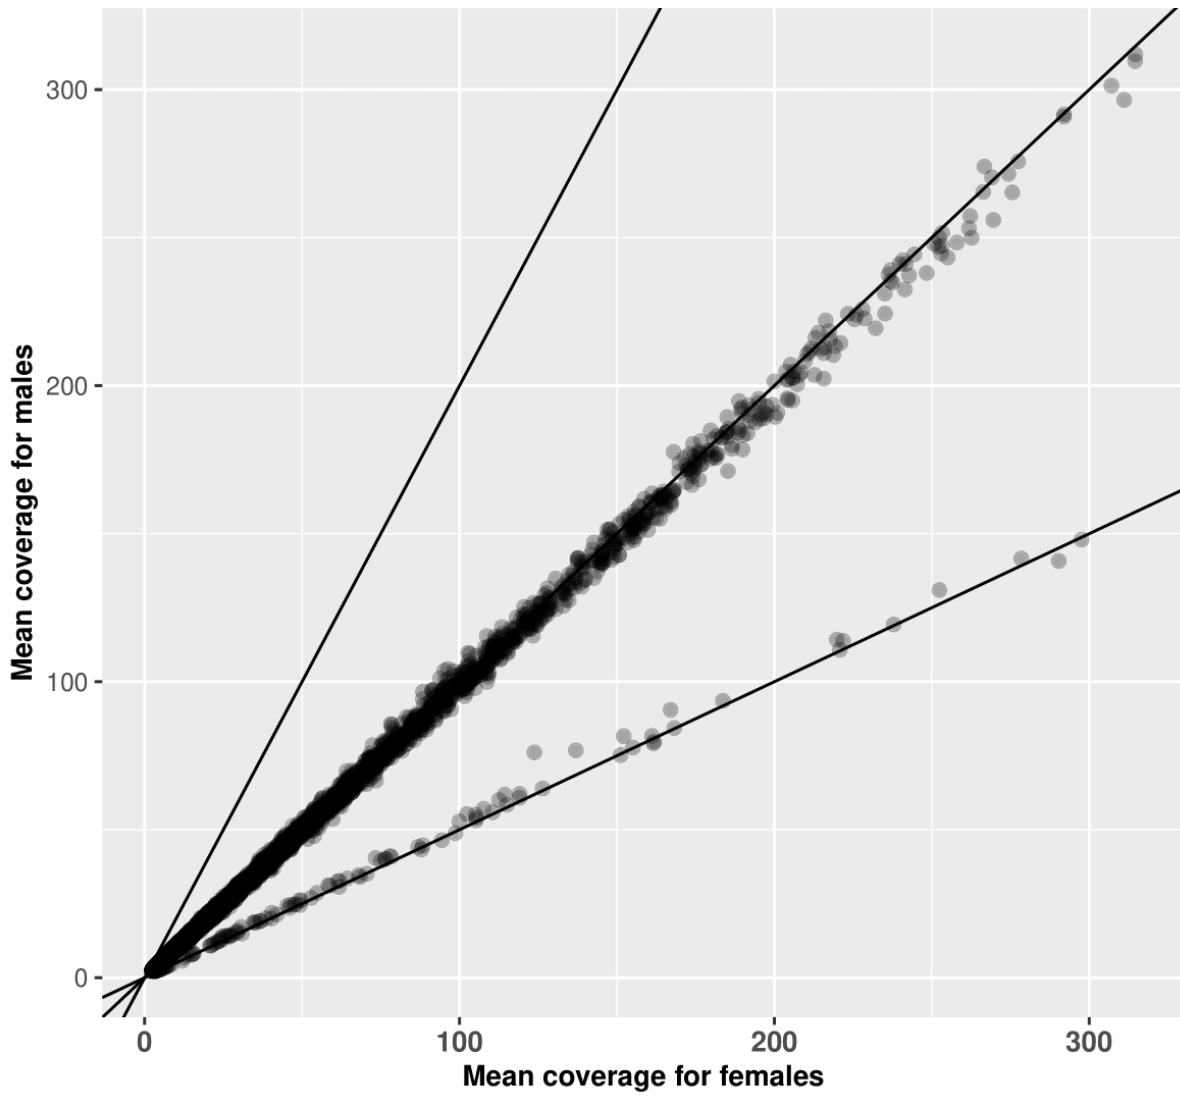

# Histogram of females over males coverage for each marker

Sex is visually assigned

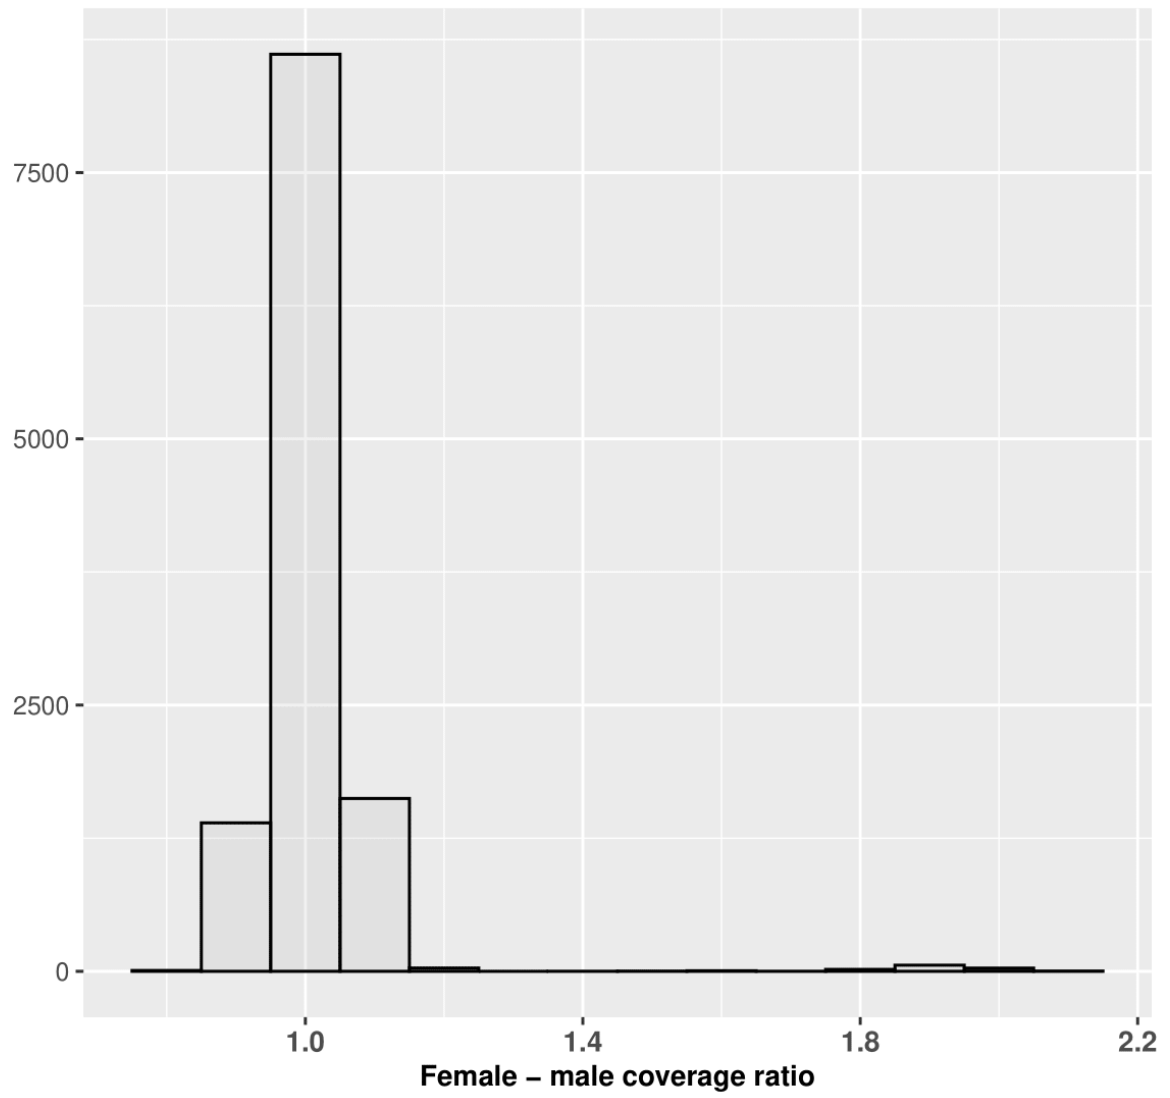

## Histogram of females counts over males counts for each marker

Sex is visually assigned

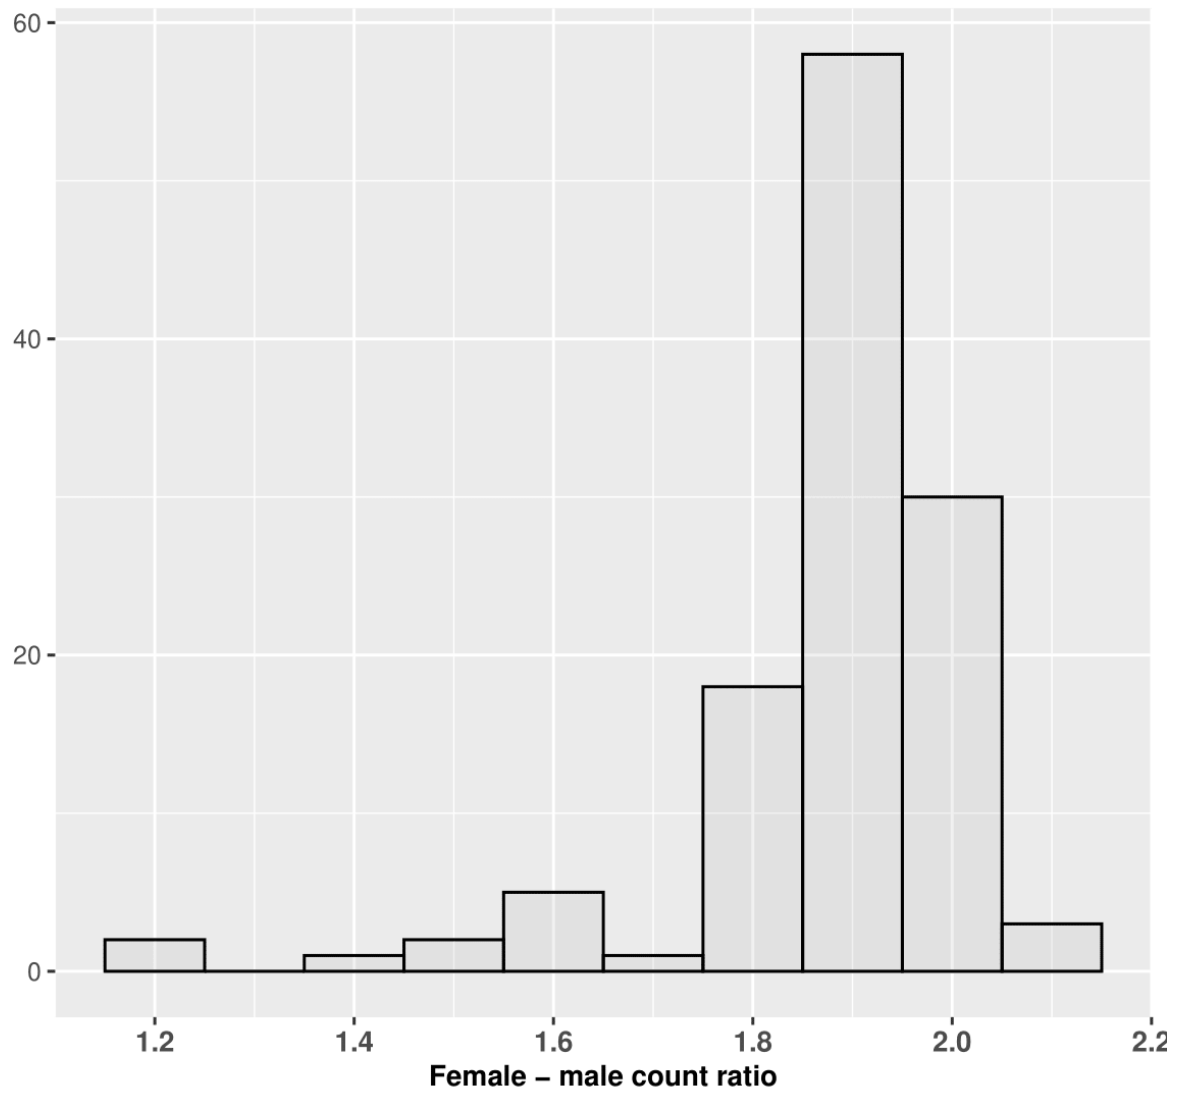

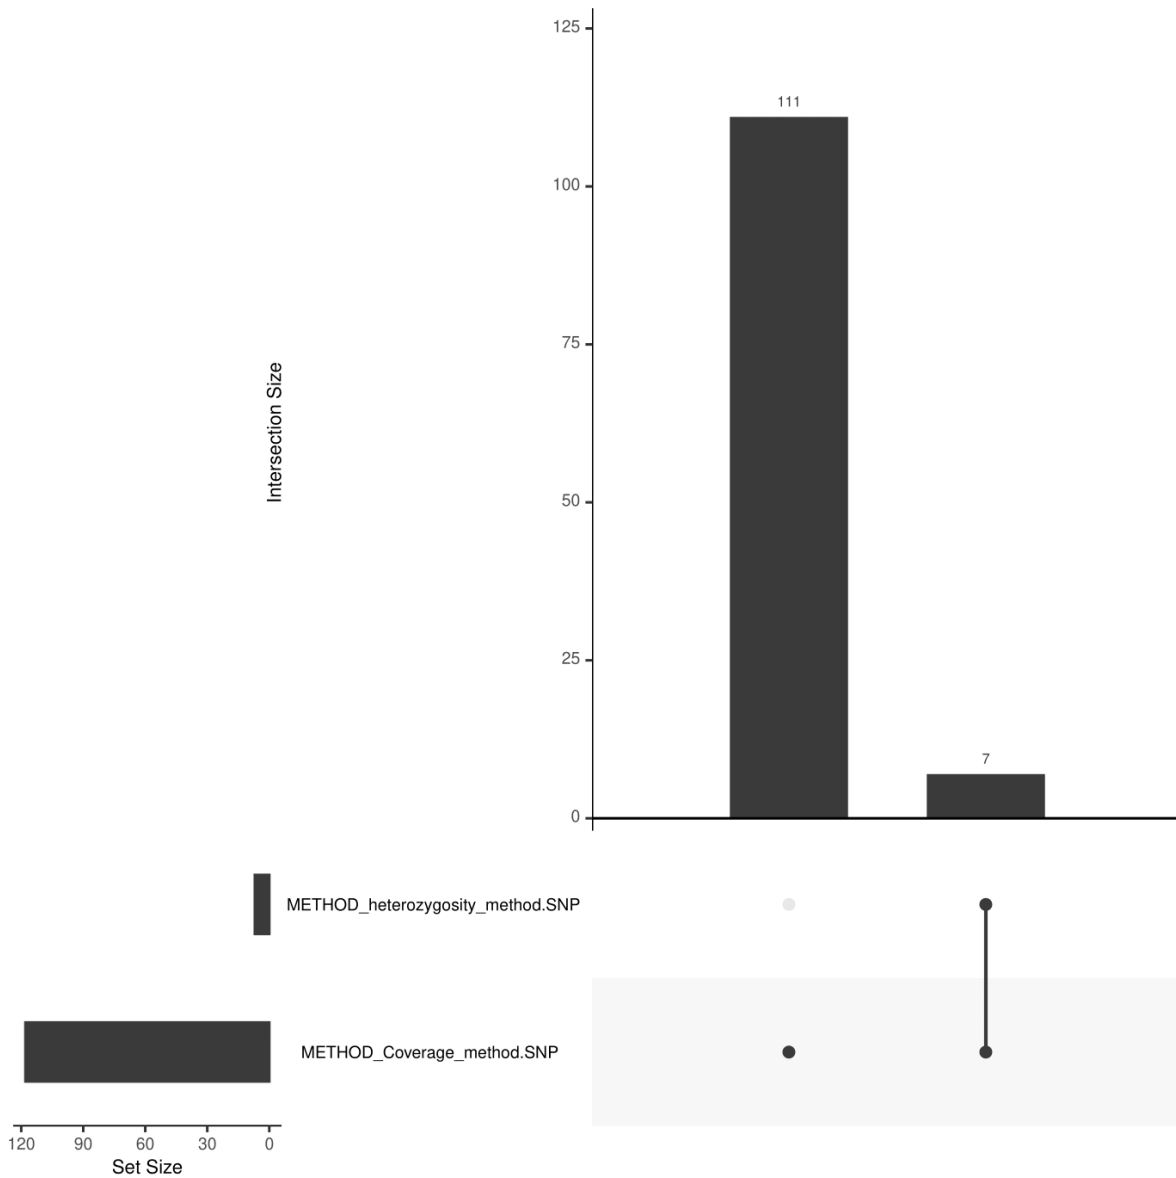

## 7.4 Filter data

1. Marker Reproducibility: 0.98
2. Individual missingness: 0.75•
3. Individual Het - low: n
4. Individual Het - high: n
5. Individual total coverage - low: 10,000
6. Individual total coverage - high: 1,000,000
7. Marker MAC - low: 4
8. Marker coverage - low: 4
9. Marker coverage - high:33
10. Marker maximum missing proportion: 0.1
11. Marker snp position on locus: n
12. Max 3 SNPs per locus
13. 1 SNP per locus according to mac
14. no LD filter
15. Individual Het - low: n
16. Individual Het - high: n
17. Duplicated individuals: n

## 18. No filter on HWE

```
dartcap.data <- "SEQ_SNPs_counts_0_Target_merge.csv"
strata <- "Bull_shark_DArTcap_strata.tsv"
BSsnp <- radiator::filter_rad(dartcap.data, strata,
                             parallel.core = parallel::detectCores() - 1)

BS.dartcap.SF.gds <- BSsnp$gds
BS.dartcap.SF.tidy <- BSsnp$output$tidy.data
print(BS.dartcap.SF.gds, expand = TRUE, all = TRUE, attribute = TRUE,
      attribute.trim = FALSE)
```

Table 10:

| FILTERS                                    | VALUES      | BEFORE                        | BLACKLIST                 |
|--------------------------------------------|-------------|-------------------------------|---------------------------|
| Filter DArT reproducibility                | 0.98        | 1014 / 34 / 1 / 26335 / 37537 | 0 / 0 / 0 / 1043 / 2250   |
| Filter monomorphic markers                 | NA          | 1014 / 34 / 1 / 25292 / 35287 | 0 / 0 / 0 / 0 / 0         |
| Filter markers in common                   | NA          | 1014 / 34 / 1 / 25292 / 35287 | 0 / 0 / 0 / 10291 / 17213 |
| Filter individuals based on missingness    | 0.75        | 1014 / 34 / 1 / 15001 / 18074 | 8 / 0 / 0 / 0 / 0         |
| Filter individuals based on total coverage | 10000 1e+06 | 1006 / 34 / 1 / 15001 / 18074 | 5 / 0 / 0 / 0 / 0         |
| Filter monomorphic markers                 | NA          | 1001 / 34 / 1 / 15001 / 18074 | 0 / 0 / 0 / 1306 / 1879   |
| Filter MAC                                 | 4           | 1001 / 34 / 1 / 13695 / 16195 | 0 / 0 / 0 / 2050 / 3069   |
| Filter coverage min / max                  | 4-33        | 1001 / 34 / 1 / 11645 / 13126 | 0 / 0 / 0 / 5384 / 5816   |
| Filter genotyping                          | 0.1         | 1001 / 34 / 1 / 6261 / 7310   | 0 / 0 / 0 / 1166 / 1285   |
| Filter SNPs position on the read           | all         | 1001 / 34 / 1 / 5095 / 6025   | 0 / 0 / 0 / 0 / 0         |
| Filter markers snp number                  | 3           | 1001 / 34 / 1 / 5095 / 6025   | 0 / 0 / 0 / 33 / 143      |
| Filter short ld                            | mac         | 1001 / 34 / 1 / 5062 / 5882   | 0 / 0 / 0 / 0 / 820       |
| detect mixed genomes                       | 0 1         | 1001 / 34 / 1 / 5062 / 5062   | 0 / 0 / 0 / 0 / 0         |
| detect duplicate genomes                   | 0           | 1001 / 34 / 1 / 5062 / 5062   | 0 / 0 / 0 / 0 / 0         |
| Filter HWE                                 | NA          | 1001 / 34 / 1 / 5062 / 5062   | 0 / 0 / 0 / 0 / 0         |

## 7.5 Save data

```
Convert <- radiator::genomic_converter(BS.dartcap.SF.gds,
                                       output = c("genlight", "stockr",
                                                  "pcadapt", "gtypes"))

BS.dartcap.SF.gl <- Convert$genlight
BS.dartcap.SF.stkr <- Convert$stockr
BS.dartcap.SF.pc <- Convert$pcadapt
BS.dartcap.SF.gt <- Convert$gtypes

markers.meta <- radiator::extract_markers_metadata(BS.dartcap.SF.gds, whitelist = TRUE)
individuals.meta <- radiator::extract_individuals_metadata(BS.dartcap.SF.gds, whitelist = TRUE)
BS.dartcap.SF.gl$other$ind.metrics <- individuals.meta
BS.dartcap.SF.gl$other$loc.metrics <- markers.meta
BS.dartcap.SF.gt@schemes <- individuals.meta

pop.levels <- c("Costa Rica", "Brazil", "Caribbean Sea", "Gulf of Mexico",
               "Western North Atlantic", "Sierra Leone", "South Africa",
               "Mozambique", "Reunion", "Seychelles", "Arabian Sea", "Sri Lanka",
               "Thailand", "Indonesia", "Papua New Guinea", "Fitzroy River",
               "Durack River", "Daly River", "Adelaide River", "Darwin Coastal",
               "South Alligator River", "East Alligator River", "Blue mud Bay",
               "Roper River", "Towns River", "Unknown", "Wenlock River", "Trinity inlet",
               "Clarence River", "Sydney Harbour", "Okinawa", "Urauchi River", "Fiji")
BS.dartcap.SF.gl$pop <- factor(BS.dartcap.SF.gl$other$ind.metrics$Site2,
                              levels = pop.levels)
BS.dartcap.SF.gl <- BS.dartcap.SF.gl[order(BS.dartcap.SF.gl$pop,
                                           BS.dartcap.SF.gl$ind.names)]

save(BS.dartcap.SF.tidy, BS.dartcap.SF.gl, BS.dartcap.SF.stkr,
     BS.dartcap.SF.pc, BS.dartcap.SF.gt, markers.meta, individuals.meta,
     file = "DarTcap_ALL_SF_objects.Rdata")
```

## 7.6 Load data

```
load("DARtcap_ALL_SF_objects.Rdata")
pop.levels <- c("Costa Rica" , "Brazil", "Caribbean Sea", "Gulf of Mexico",
              "Western North Atlantic", "Sierra Leone", "South Africa",
              "Mozambique", "Reunion" , "Seychelles", "Arabian Sea", "Sri Lanka",
              "Thailand", "Indonesia", "Papua New Guinea" , "Fitzroy River",
              "Durack River", "Daly River", "Adelaide River", "Darwin Coastal",
              "South Alligator River", "East Alligator River", "Blue mud Bay",
              "Roper River", "Towns River", "Unknown", "Wenlock River", "Trinity inlet",
              "Clarence River", "Sydney Harbour", "Okinawa", "Urauchi River", "Fiji")

BS.dartcap.SF.gl$pop <- factor(BS.dartcap.SF.gl$other$ind.metrics$Site2,
                             levels = pop.levels)
BS.dartcap.SF.gl <- BS.dartcap.SF.gl[order(BS.dartcap.SF.gl$pop,
                                           BS.dartcap.SF.gl$ind.names)]

adegenet::nInd(BS.dartcap.SF.gl) # 1001
adegenet::nLoc(BS.dartcap.SF.gl) # 5065
summary(BS.dartcap.SF.gl$pop)
sum(duplicated(stringr::str_replace_all(pattern = "\\..1", replacement = "",
                                       string = BS.dartcap.SF.gl$ind.names))) # 79 replicate left
sum(baits$CloneID %in% BS.dartcap.SF.gl$other$loc.metrics$LOCUS) #60

## [1] 1001
## [1] 5062
##           Costa Rica           Brazil           Caribbean Sea
##           34                60                2
##           Gulf of Mexico Western North Atlantic           Sierra Leone
##           52                9                1
##           South Africa           Mozambique           Reunion
##           31                14               29
##           Seychelles           Arabian Sea           Sri Lanka
##           42                43               23
##           Thailand           Indonesia           Papua New Guinea
##           8                8                17
##           Fitzroy River           Durack River           Daly River
##           7                4                52
##           Adelaide River           Darwin Coastal South Alligator River
##           23               18               95
##           East Alligator River           Blue mud Bay           Roper River
##           55               18               9
##           Towns River           Unknown           Wenlock River
##           13               12               32
##           Trinity inlet           Clarence River           Sydney Harbour
##           5                123              78
##           Okinawa           Urauchi River           Fiji
##           10               42               32
## [1] 79
## [1] 60
```

## 7.7 Remove sex-linked markers

```
load("Sex_results.Rdata")
sum(BS.dartcap.SF.gl$loc.names %in% bull_shark$sexy.summary$CLONE_ID ) #12
sex.markers <- bull_shark$sexy.summary$CLONE_ID

locnames <- BS.dartcap.SF.gl$loc.names
```



```
BS.dartcap.SF.gl <- BS.dartcap.SF.gl[,!locnames %in% sex.markers]
BS.dartcap.SF.gl$other$loc.metrics <- BS.dartcap.SF.gl$other$loc.metrics[!locnames %in%
sex.markers,]
```

```
sum(sex.markers %in% unique(BS.dartcap.SF.tidy$LOCUS)) # 12
BS.dartcap.SF.tidy <- BS.dartcap.SF.tidy[!BS.dartcap.SF.tidy$LOCUS %in%
sex.markers,]
```

```
## [1] 12
```

```
## [1] 18
```

## 7.8 PCA to identify species

```
pca1 <- adegenet::glPca(BS.dartcap.SF.gl, nf = 8, parallel = TRUE,
n.cores = parallel::detectCores() - 1)
save(pca1, file = "DARtcap_SF_SpeciesID_PCA.Rdata")
```

```
load("DARtcap_SF_SpeciesID_PCA.Rdata")
```

```
BS.pca.scores <- as.data.frame(pca1$scores)
BS.pca.scores$pop <- pop(BS.dartcap.SF.gl)
BS.pca.scores$species <- BS.dartcap.SF.gl$other$ind.metrics$SpeciesID_genetic
cols <- adegenet::funky(nPop(BS.dartcap.SF.gl))
```

```
p <- ggplot2::ggplot(BS.pca.scores, ggplot2::aes(x = PC1, y = PC2, colour = pop,
group = species)) +
ggplot2::geom_point(aes(shape = species), size = 2) +
ggplot2::scale_color_manual(values = cols) +
ggplot2::scale_shape_manual(values = c(1,2,3,4,5,6,8,9)) +
ggplot2::geom_hline(yintercept = 0) +
ggplot2::geom_vline(xintercept = 0) +
ggplot2::theme(panel.background = ggplot2::element_rect(fill = "white",
colour = "white"),
panel.grid.major = ggplot2::element_line(size = 0.5,
linetype = 'solid',
colour = "grey"),
panel.grid.minor = ggplot2::element_line(size = 0.1,
linetype = 'solid',
colour = "grey"),
legend.text = ggplot2::element_text(size = 7),
legend.position = "right",
panel.border = element_rect(colour = "black", fill = NA,
size = 1.5)) +
ggplot2::guides(shape = ggplot2::guide_legend(ncol = 2),
col = ggplot2::guide_legend(ncol = 3),
override.aes = list(size = 0.5))
```

```
p
```

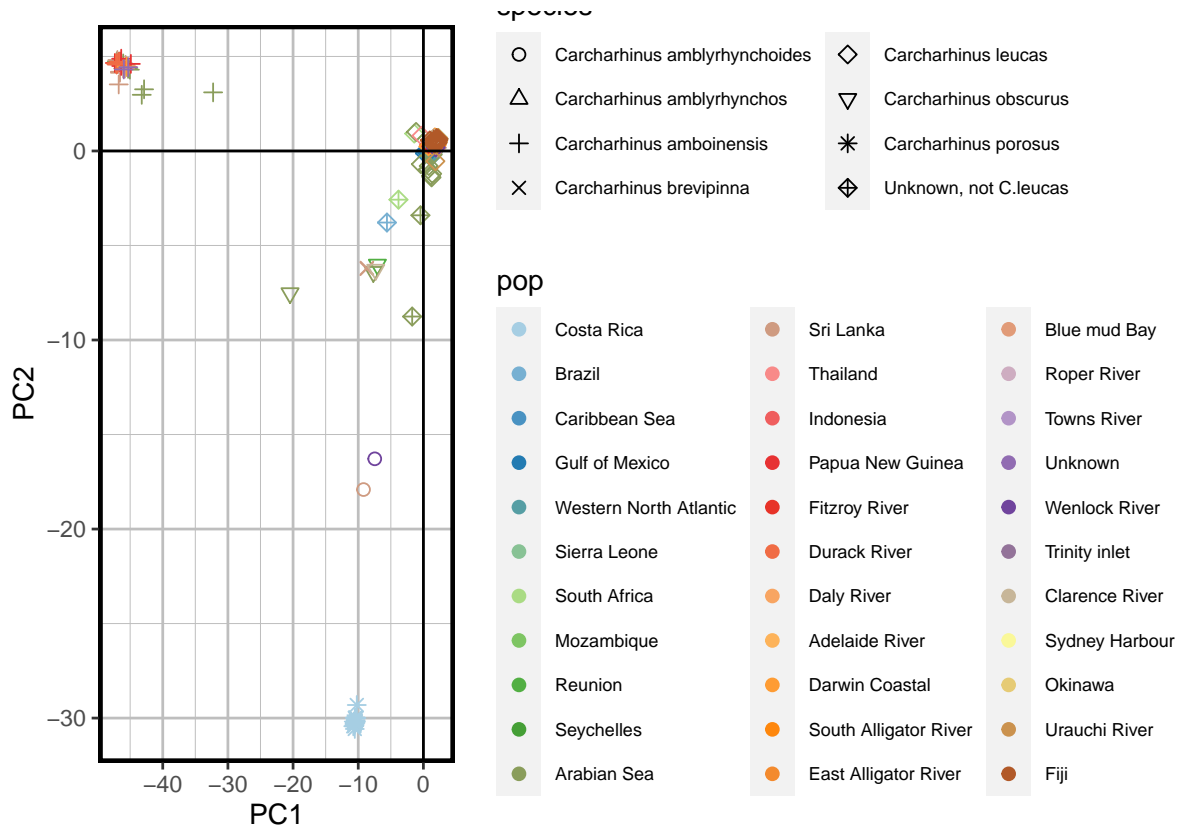

```
ggplot2::ggsave(p, filename = "DARtcap_SF_SpeciesID_PCA1.png",
               width = 30, height = 15, units = "cm")

p <- ggplot2::ggplot(BS.pca.scores, ggplot2::aes(x = PC1, y = PC3, colour = pop)) +
  ggplot2::geom_point(aes(shape = species), size = 2) +
  ggplot2::scale_color_manual(values = cols) +
  ggplot2::scale_shape_manual(values = c(1,2,3,4,5,6,8,9)) +
  ggplot2::geom_hline(yintercept = 0) + ggplot2::geom_vline(xintercept = 0) +
  ggplot2::theme(panel.background = ggplot2::element_rect(fill = "white",
                                                         colour = "white"),
                panel.grid.major = ggplot2::element_line(size = 0.5,
                                                         linetype = 'solid',
                                                         colour = "grey"),
                panel.grid.minor = ggplot2::element_line(size = 0.1,
                                                         linetype = 'solid',
                                                         colour = "grey"),
                legend.text = ggplot2::element_text(size = 7),
                legend.position = "right",
                panel.border = element_rect(colour = "black",
                                           fill = NA, size = 1.5)) +
  ggplot2::guides(shape = ggplot2::guide_legend(ncol = 2),
                 col = ggplot2::guide_legend(ncol = 3),
                 override.aes = list(size = 0.5))
```

p

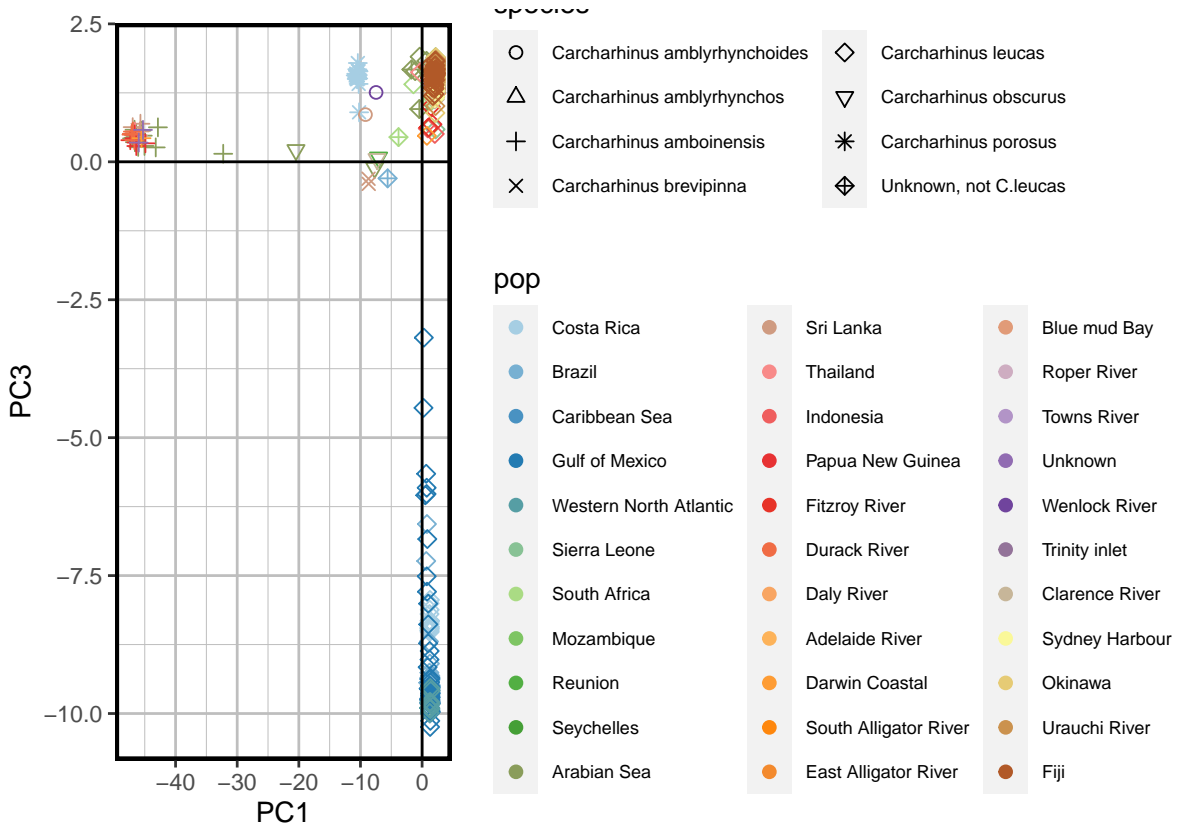

```
ggplot2::ggsave(p, filename = "DARtcap_SF_SpeciesID_PCA2.png",
               width = 30, height = 15, units = "cm")

p <- ggplot2::ggplot(BS.pca.scores, ggplot2::aes(x = PC2, y = PC3, colour = pop)) +
  ggplot2::geom_point(aes(shape = species), size = 2) +
  ggplot2::scale_color_manual(values = cols) +
  ggplot2::scale_shape_manual(values = c(1,2,3,4,5,6,8,9)) +
  ggplot2::geom_hline(yintercept = 0) + ggplot2::geom_vline(xintercept = 0) +
  ggplot2::theme(panel.background = ggplot2::element_rect(fill = "white",
                                                         colour = "white"),
                panel.grid.major = ggplot2::element_line(size = 0.5,
                                                         linetype = 'solid',
                                                         colour = "grey"),
                panel.grid.minor = ggplot2::element_line(size = 0.1,
                                                         linetype = 'solid',
                                                         colour = "grey"),
                legend.text = ggplot2::element_text(size = 7),
                legend.position = "right",
                panel.border = element_rect(colour = "black", fill = NA, size = 1.5)) +
  ggplot2::guides(shape = ggplot2::guide_legend(ncol = 2),
                 col = ggplot2::guide_legend(ncol = 3),
                 override.aes = list(size = 0.5))
```

p

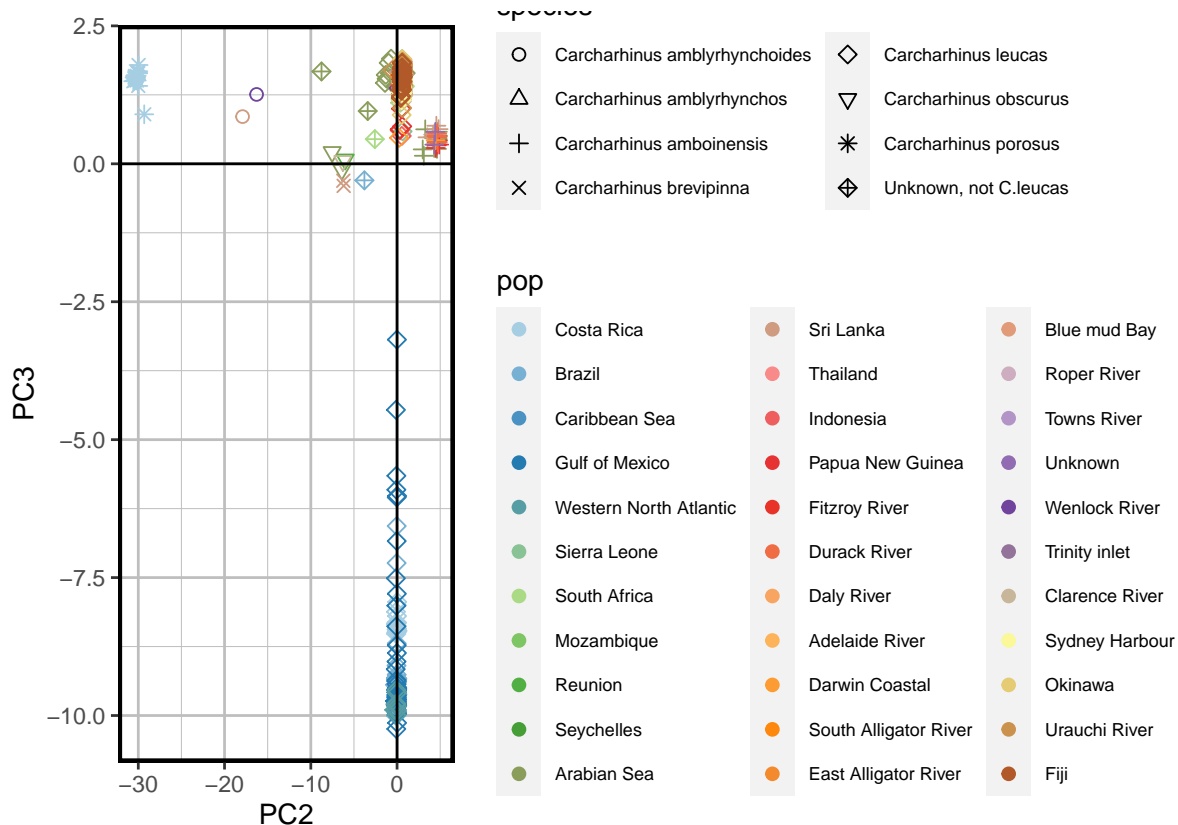

```

ggplot2::ggsave(p, filename = "DArTcap_SF_SpeciesID_PCA3.png",
               width = 30, height = 15, units = "cm")

p <- ggplot2::ggplot(BS.pca.scores, ggplot2::aes(x = PC3, y = PC4, colour = pop)) +
  ggplot2::geom_point(aes(shape = species), size = 2) +
  ggplot2::scale_color_manual(values = cols) +
  ggplot2::scale_shape_manual(values = c(1,2,3,4,5,6,8,9)) +
  ggplot2::geom_hline(yintercept = 0) + ggplot2::geom_vline(xintercept = 0) +
  ggplot2::theme(panel.background = ggplot2::element_rect(fill = "white",
                                                         colour = "white"),
                panel.grid.major = ggplot2::element_line(size = 0.5,
                                                         linetype = 'solid',
                                                         colour = "grey"),
                panel.grid.minor = ggplot2::element_line(size = 0.1,
                                                         linetype = 'solid',
                                                         colour = "grey"),
                legend.text = ggplot2::element_text(size = 7),
                legend.position = "right",
                panel.border = element_rect(colour = "black", fill = NA, size = 1.5)) +
  ggplot2::guides(shape = ggplot2::guide_legend(ncol = 2),
                 col = ggplot2::guide_legend(ncol = 3),
                 override.aes = list(size = 0.5))

```

p

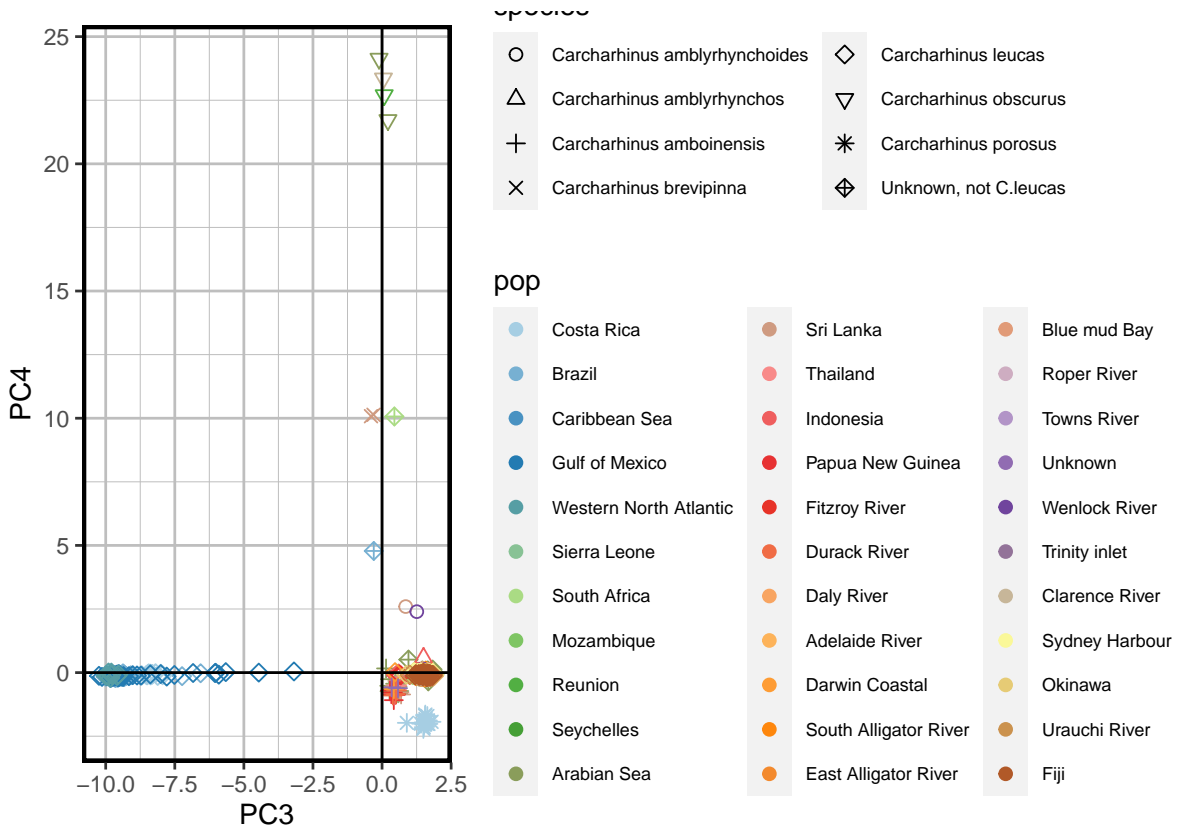

```

ggplot2::ggsave(p, filename = "DARtcap_SF_SpeciesID_PCA4.png",
                width = 30, height = 15, units = "cm")

p <- ggplot2::ggplot(BS.pca.scores, ggplot2::aes(x = PC2, y = PC4, colour = pop)) +
  ggplot2::geom_point(aes(shape = species), size = 2) +
  ggplot2::scale_color_manual(values = cols) +
  ggplot2::scale_shape_manual(values = c(1,2,3,4,5,6,8,9)) +
  ggplot2::geom_hline(yintercept = 0) + ggplot2::geom_vline(xintercept = 0) +
  ggplot2::theme(panel.background = ggplot2::element_rect(fill = "white",
                                                         colour = "white"),
                panel.grid.major = ggplot2::element_line(size = 0.5,
                                                         linetype = 'solid',
                                                         colour = "grey"),
                panel.grid.minor = ggplot2::element_line(size = 0.1,
                                                         linetype = 'solid',
                                                         colour = "grey"),
                legend.text = ggplot2::element_text(size = 7),
                legend.position = "right",
                panel.border = element_rect(colour = "black", fill = NA,
                                           size = 1.5)) +
  ggplot2::guides(shape = ggplot2::guide_legend(ncol = 2),
                 col = ggplot2::guide_legend(ncol = 3),
                 override.aes = list(size = 0.5))

```

p

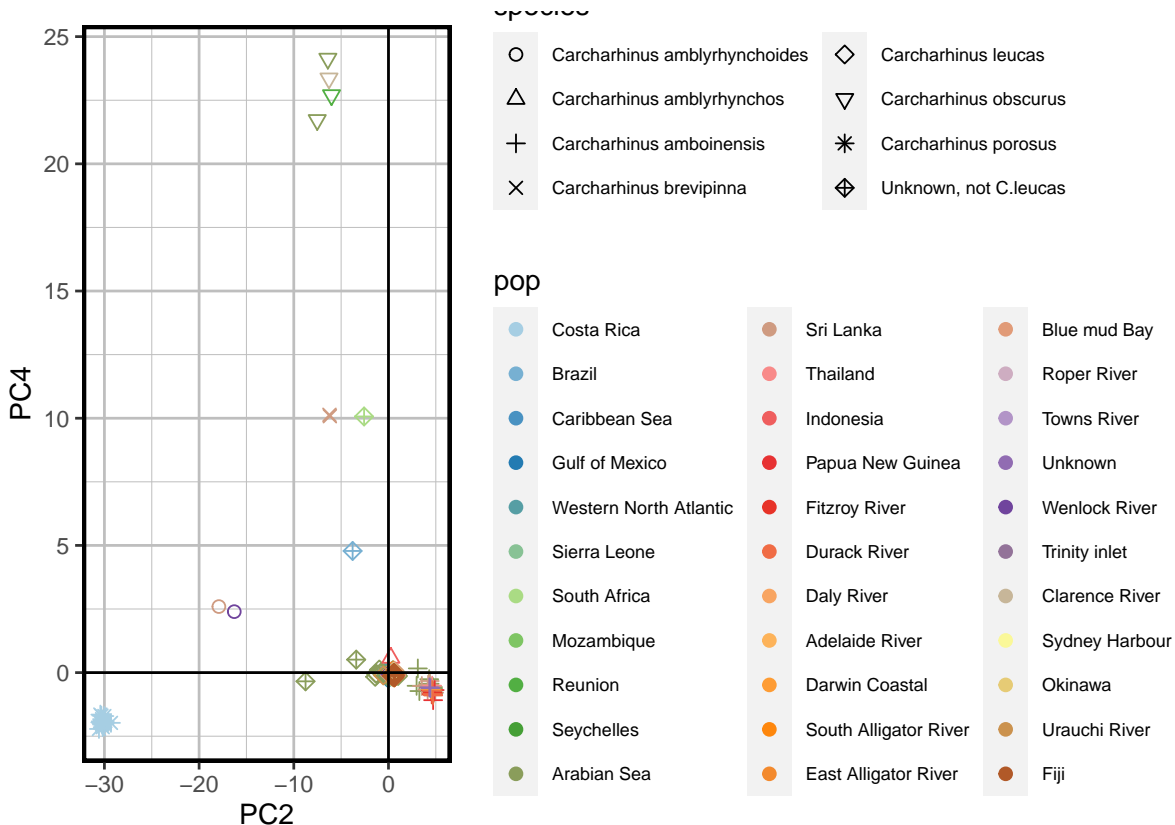

```
ggplot2::ggsave(p, filename = "DARtcap_SF_SpeciesID_PCA5.png",
               width = 30, height = 15, units = "cm")

p <- ggplot2::ggplot(BS.pca.scores, ggplot2::aes(x = PC1, y = PC6, colour = pop)) +
  ggplot2::geom_point(aes(shape = species), size = 2) +
  ggplot2::scale_color_manual(values = cols) +
  ggplot2::scale_shape_manual(values = c(1,2,3,4,5,6,8,9)) +
  ggplot2::geom_hline(yintercept = 0) + ggplot2::geom_vline(xintercept = 0) +
  ggplot2::theme(panel.background = ggplot2::element_rect(fill = "white",
                                                         colour = "white"),
                panel.grid.major = ggplot2::element_line(size = 0.5,
                                                         linetype = 'solid',
                                                         colour = "grey"),
                panel.grid.minor = ggplot2::element_line(size = 0.1,
                                                         linetype = 'solid',
                                                         colour = "grey"),
                legend.text = ggplot2::element_text(size = 7),
                legend.position = "right",
                panel.border = element_rect(colour = "black", fill = NA,
                                           size = 1.5)) +
  ggplot2::guides(shape = ggplot2::guide_legend(ncol = 2),
                  col = ggplot2::guide_legend(ncol = 3),
                  override.aes = list(size = 0.5))
```

p

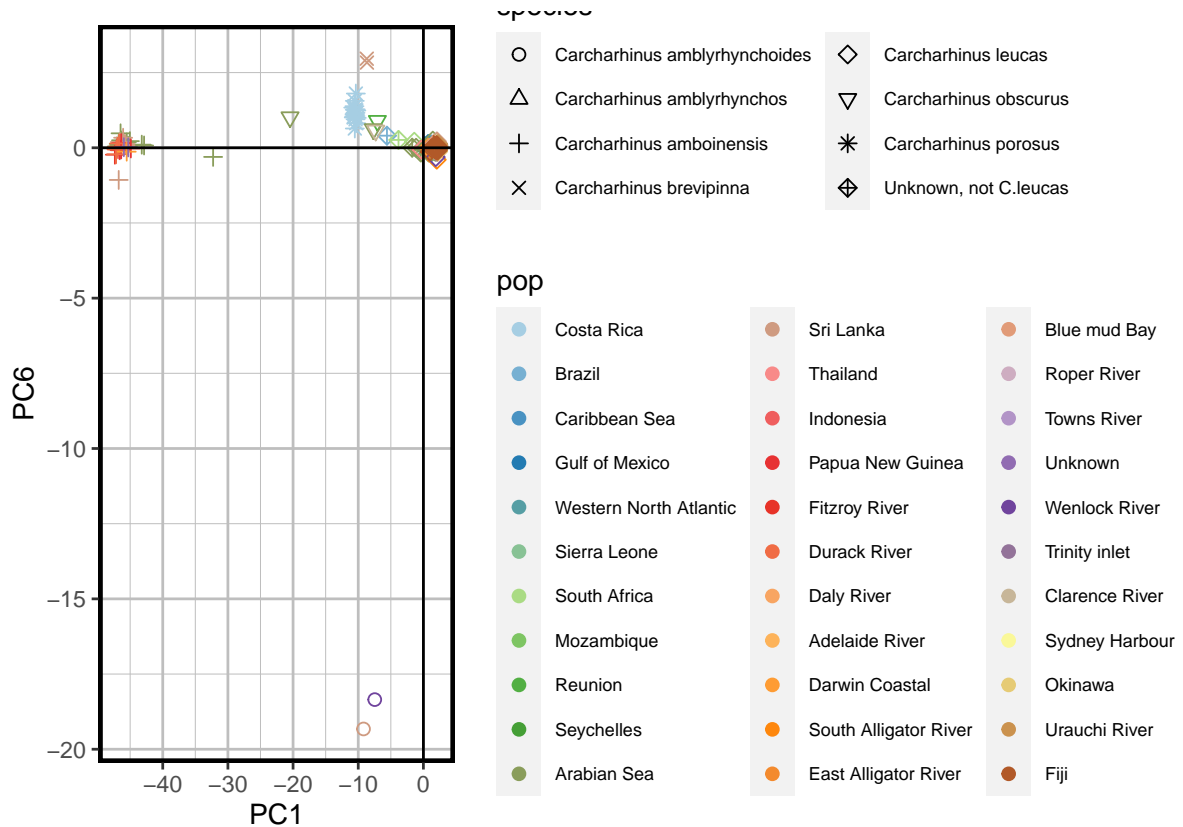

```

ggplot2::ggsave(p, filename = "DARtcap_SF_SpeciesID_PCA6.png",
                width = 30, height = 15, units = "cm")

p <- ggplot2::ggplot(BS.pca.scores, ggplot2::aes(x = PC2, y = PC6, colour = pop)) +
  ggplot2::geom_point(aes(shape = species), size = 2) +
  ggplot2::scale_color_manual(values = cols) +
  ggplot2::scale_shape_manual(values = c(1,2,3,4,5,6,8,9)) +
  ggplot2::geom_hline(yintercept = 0) + ggplot2::geom_vline(xintercept = 0) +
  ggplot2::theme(panel.background = ggplot2::element_rect(fill = "white",
                                                         colour = "white"),
                panel.grid.major = ggplot2::element_line(size = 0.5,
                                                         linetype = 'solid',
                                                         colour = "grey"),
                panel.grid.minor = ggplot2::element_line(size = 0.1,
                                                         linetype = 'solid',
                                                         colour = "grey"),
                legend.text = ggplot2::element_text(size = 7),
                legend.position = "right",
                panel.border = element_rect(colour = "black",
                                           fill = NA, size = 1.5)) +
  ggplot2::guides(shape = ggplot2::guide_legend(ncol = 2),
                 col = ggplot2::guide_legend(ncol = 3),
                 override.aes = list(size = 0.5))

```

p

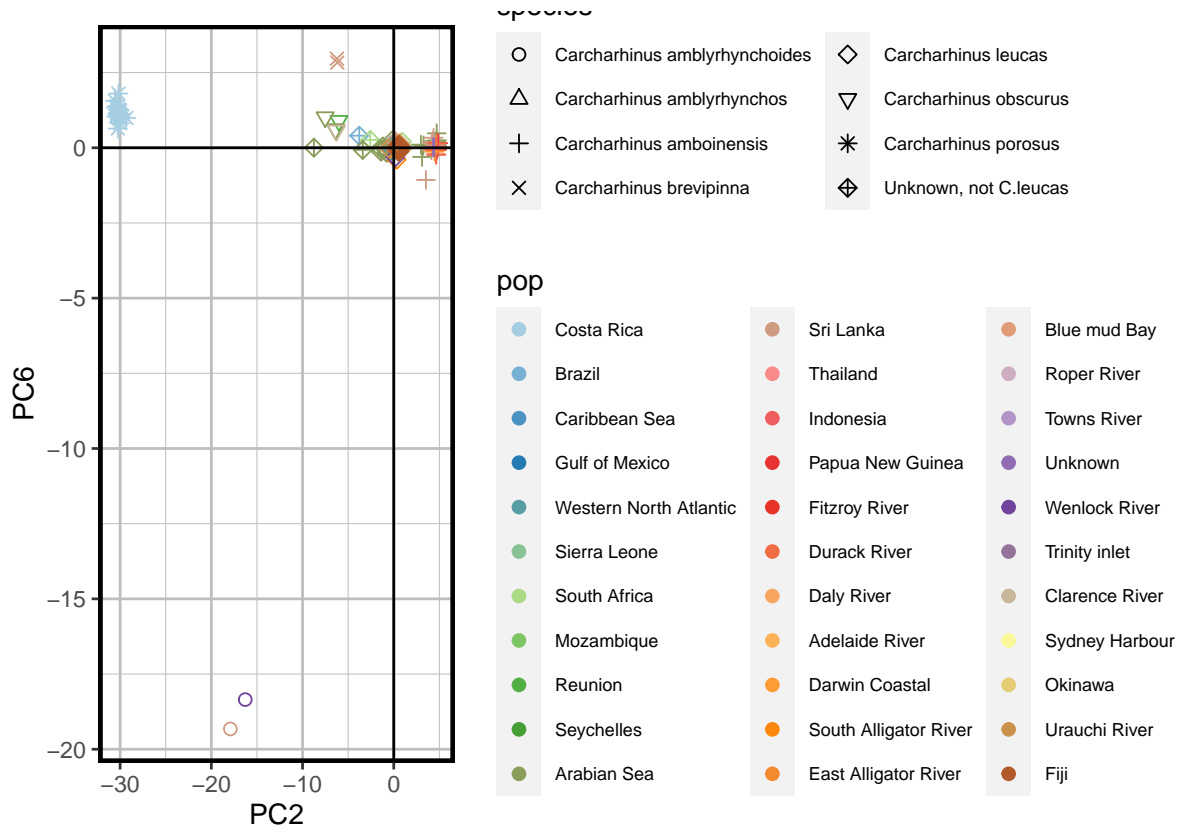

```
ggplot2::ggsave(p, filename = "DArTcap_SF_SpeciesID_PCA7.png",
  width = 30, height = 15, units = "cm")
```



## 8 DATA2: DArTcap - Only Bull Shark

### 8.1 Set strata

```
strata <- radiator::read_strata("Bull_shark_DArTcap_strata.tsv",
                              keep.two = FALSE)$strata %>%
  dplyr::filter(SpeciesID_genetic == "Carcharhinus leucas")
readr::write_tsv(strata, path = "Bull_shark_DArTcap_strata2.tsv")
```

1. Marker Reproducibility: 0.98
2. Individual missingness: 0.35
3. Individual Het - low: 0
4. Individual Het - high: 0.05
5. Individual total coverage - low: 10,000
6. Individual total coverage - high: 1,000,000
7. Marker MAC - low: 4
8. Marker coverage - low: 4
9. Marker coverage - high:60
10. Marker maximum missing proportion: 0.1
11. Marker snp position on locus: n
12. Max 3 SNPs per locus
13. 1 SNP per locus according to mac
14. no LD filter
15. Individual Het - low: 0.031
16. Individual Het - high: 0.08
17. Duplicated individuals: n
18. Filter on HWE: 4 pop, 0.001

### 8.2 Filter data

```
dartcap.data <- "SEQ_SNPs_counts_0_Target_merge.csv"
strata <- "Bull_shark_DArTcap_strata2.tsv"
BSsnp <- radiator::filter_rad(dartcap.data, strata,
                              parallel.core = 1)

BS.dartcap.gds <- BSsnp$gds
BS.dartcap.tidy <- BSsnp$output$tidy.data
print(BS.dartcap.gds, expand=TRUE, all = TRUE, attribute=TRUE,
      attribute.trim = FALSE)

save(BS.dartcap.tidy, file = "DArTcap_ALL_objects.Rdata")
```

Table 11:

| FILTERS                                    | VALUES      | BEFORE                       | BLACKLIST                 |
|--------------------------------------------|-------------|------------------------------|---------------------------|
| Filter DArT reproducibility                | 0.98        | 942 / 32 / 1 / 26335 / 37537 | 0 / 0 / 0 / 1043 / 2250   |
| Filter monomorphic markers                 | NA          | 942 / 32 / 1 / 25292 / 35287 | 0 / 0 / 0 / 10550 / 17988 |
| Filter markers in common                   | NA          | 942 / 32 / 1 / 14742 / 17299 | 0 / 0 / 0 / 1710 / 2139   |
| Filter individuals based on missingness    | 0.35        | 942 / 32 / 1 / 13032 / 15160 | 20 / 0 / 0 / 0 / 0        |
| Filter individuals based on heterozygosity | 0 0.05      | 922 / 32 / 1 / 13032 / 15160 | 10 / 0 / 0 / 0 / 0        |
| Filter individuals based on total coverage | 10000 1e+06 | 912 / 32 / 1 / 13032 / 15160 | 4 / 0 / 0 / 0 / 0         |
| Filter monomorphic markers                 | NA          | 908 / 32 / 1 / 13032 / 15160 | 0 / 0 / 0 / 2115 / 2820   |
| Filter MAC                                 | 4           | 908 / 32 / 1 / 10917 / 12340 | 0 / 0 / 0 / 5725 / 6709   |
| Filter coverage min / max                  | 4-60        | 908 / 32 / 1 / 5192 / 5631   | 0 / 0 / 0 / 1367 / 1436   |
| Filter genotyping                          | 0.1         | 908 / 32 / 1 / 3825 / 4195   | 0 / 0 / 0 / 367 / 407     |
| Filter SNPs position on the read           | all         | 908 / 32 / 1 / 3458 / 3788   | 0 / 0 / 0 / 0 / 0         |
| Filter markers snp number                  | 3           | 908 / 32 / 1 / 3458 / 3788   | 0 / 0 / 0 / 4 / 17        |
| Filter short ld                            | mac         | 908 / 32 / 1 / 3454 / 3771   | 0 / 0 / 0 / 0 / 317       |
| detect mixed genomes                       | 0.031 0.08  | 908 / 32 / 1 / 3454 / 3454   | 44 / 0 / 0 / 0 / 0        |
| Filter monomorphic markers                 | NA          | 864 / 32 / 1 / 3454 / 3454   | 0 / 0 / 0 / 0 / 0         |
| detect duplicate genomes                   | 0.1         | 864 / 32 / 1 / 3454 / 3454   | 83 / 0 / 0 / 0 / 0        |
| Filter monomorphic markers                 | NA          | 781 / 32 / 1 / 3454 / 3454   | 0 / 0 / 0 / 0 / 0         |
| Filter HWE                                 | 40.001      | 781 / 32 / 1 / 3454 / 3454   | 0 / 0 / 0 / 11 / 11       |

### 8.2.1 Remove extra low and high heterozygous individuals

Because the average heterozygosity per sampling location is not even, certain individuals cannot be excluded without removing 'good' individuals.

```
rm <- c("CL-ARS021-F", "CL-GOM025-F.1", "CL-GOM012-F", "CL-SAF014-M", "CL-SAF002-F",
       "CL-BRZ038-U", "CLF003-F", "CL-GOM011-F", "CL-SAF015-F", "CL-SAF003-M",
       "CL-PNG005-U", "CLCRO56-M", "CLCRO47.1", "CLCRO55-M", "CLCRO66-M")

BS.dartcap.tidy <- BS.dartcap.tidy[!BS.dartcap.tidy$INDIVIDUALS %in% rm,]
length(unique(BS.dartcap.tidy$INDIVIDUALS)) # 769
```

### 8.3 Save data

```
Convert <- radiator::genomic_converter(BS.dartcap.tidy,
                                       output = c("genlight", "stockr", "pcadapt", "gtypes", "rubias"))

BS.dartcap.gl <- Convert$genlight
BS.dartcap.stkr <- Convert$stockr
BS.dartcap.pc <- Convert$pcadapt
BS.dartcap.gt <- Convert$gtypes
BS.dartcap.rubias <- Convert$rubias

markers.meta <- radiator::extract_markers_metadata(BS.dartcap.gds, whitelist = TRUE)
individuals.meta <- radiator::extract_individuals_metadata(BS.dartcap.gds, whitelist = TRUE)
individuals.meta <- individuals.meta[individuals.meta$INDIVIDUALS %in%
                                     BS.dartcap.gl$ind.names,]

BS.dartcap.gl$other$ind.metrics <- individuals.meta
BS.dartcap.gl$other$loc.metrics <- markers.meta
BS.dartcap.gt@schemes <- individuals.meta

pop.levels <- c("Costa Rica", "Brazil", "Caribbean Sea", "Gulf of Mexico",
              "Western North Atlantic", "Sierra Leone", "South Africa",
              "Mozambique", "Reunion", "Seychelles", "Arabian Sea",
              "Sri Lanka", "Thailand", "Indonesia", "Papua New Guinea",
              "Fitzroy River", "Daly River", "Adelaide River", "Darwin Coastal",
              "South Alligator River", "East Alligator River", "Blue mud Bay",
              "Roper River", "Towns River", "Unknown", "Wenlock River", "Trinity inlet",
              "Clarence River", "Sydney Harbour", "Okinawa", "Urauchi River", "Fiji")
BS.dartcap.gl$pop <- factor(BS.dartcap.gl$other$ind.metrics$Site2, levels = pop.levels)
BS.dartcap.gl <- BS.dartcap.gl[order(BS.dartcap.gl$pop, BS.dartcap.gl$ind.names)]
BS.dartcap.rubias$repunit <- factor(BS.dartcap.rubias$repunit, levels = pop.levels)

save(BS.dartcap.tidy, BS.dartcap.gl, BS.dartcap.stkr, BS.dartcap.pc, BS.dartcap.gt,
     BS.dartcap.rubias,
     markers.meta, individuals.meta, file = "DarTcap_ALL_objects.Rdata")
```

### 8.4 Load data

```
load("DarTcap_ALL_objects.Rdata")
pop.levels <- c("Costa Rica", "Brazil", "Caribbean Sea", "Gulf of Mexico",
              "Western North Atlantic", "Sierra Leone", "South Africa",
              "Mozambique", "Reunion", "Seychelles", "Arabian Sea", "Sri Lanka",
              "Thailand", "Indonesia", "Papua New Guinea", "Fitzroy River",
              "Daly River", "Adelaide River", "Darwin Coastal", "South Alligator River",
              "East Alligator River", "Blue mud Bay", "Roper River", "Towns River",
              "Unknown", "Wenlock River", "Trinity inlet", "Clarence River",
```

```

"Sydney Harbour", "Okinawa", "Urauchi River", "Fiji")

BS.dartcap.gl$pop <- factor(BS.dartcap.gl$other$ind.metrics$Site2,
                           levels = pop.levels)
BS.dartcap.gl <- BS.dartcap.gl[order(BS.dartcap.gl$pop, BS.dartcap.gl$ind.names)]

pop.levels1 <- stringr::str_replace_all(pop.levels, " ", "_")
BS.dartcap.tidy$POP_ID <- factor(BS.dartcap.tidy$POP_ID, levels = pop.levels1)
BS.dartcap.tidy <- BS.dartcap.tidy[order(BS.dartcap.tidy$POP_ID,
                                         BS.dartcap.tidy$INDIVIDUALS),]

adegenet::nInd(BS.dartcap.gl) # 769
adegenet::nLoc(BS.dartcap.gl) # 3443
summary(BS.dartcap.gl$pop)
sum(duplicated(BS.dartcap.gl$other$ind.metrics$`Genetic code`)) # 0 replicate left
sum(baits$CloneID %in% BS.dartcap.gl$other$loc.metrics$LOCUS) #78

## [1] 769
## [1] 3443
##           Costa Rica           Brazil           Caribbean Sea
##                16                50                2
##   Gulf of Mexico Western North Atlantic           Sierra Leone
##                37                8                1
##           South Africa           Mozambique           Reunion
##                22                11                28
##           Seychelles           Arabian Sea           Sri Lanka
##                36                15                12
##           Thailand           Indonesia           Papua New Guinea
##                5                4                9
##   Fitzroy River           Daly River           Adelaide River
##                3                49                18
##   Darwin Coastal South Alligator River East Alligator River
##                15                88                47
##           Blue mud Bay           Roper River           Towns River
##                18                9                10
##           Unknown           Wenlock River           Trinity inlet
##                10                24                5
##   Clarence River           Sydney Harbour           Okinawa
##                83                65                9
##   Urauchi River           Fiji
##                35                25

## [1] 0
## [1] 78

```

## 8.5 Remove sex-linked markers

```

load("Sex-linked_marker_DArTcap.Rdata")
load("Sex_results.Rdata")
sum(bull_shark$sexy.summary$CLONE_ID %in% SLM$sexy.summary$CLONE_ID) #33
sum(SLM$sexy.summary$CLONE_ID %in% bull_shark$sexy.summary$CLONE_ID) #23
sex.markers <- unique(c(bull_shark$sexy.summary$CLONE_ID, SLM$sexy.summary$CLONE_ID))

sum(BS.dartcap.gl$loc.names %in% sex.markers) #34
locnames <- BS.dartcap.gl$loc.names
BS.dartcap.gl <- BS.dartcap.gl[,!locnames %in% sex.markers]
BS.dartcap.gl$other$loc.metrics <- BS.dartcap.gl$other$loc.metrics[!locnames %in%

```

```

sex.markers,]

sum(sex.markers %in% unique(BS.dartcap.tidy$LOCUS)) # 34
BS.dartcap.tidy <- BS.dartcap.tidy[!BS.dartcap.tidy$LOCUS %in% sex.markers,]

locus.gt <- stringr::str_match(pattern = "__\\s*(.*?)\\s*__",
                              string = BS.dartcap.gt@data$locus)[,2]
BS.dartcap.gt <- BS.dartcap.gt[,!locus.gt %in% sex.markers, , drop = TRUE]

locus.rubias <- stringr::str_match(pattern = "__\\s*(.*?)\\s*__",
                                   string = colnames(BS.dartcap.rubias))[,2]
BS.dartcap.rubias <- BS.dartcap.rubias[,!locus.rubias %in% sex.markers]

## [1] 33
## [1] 23
## [1] 34
## [1] 34

```

## 8.6 Genetic diversity

```

set.seed(124)
pop.levels <- c("Costa Rica" , "Brazil","Caribbean Sea","Gulf of Mexico",
               "Western North Atlantic", "South Africa", "Mozambique", "Reunion" ,
               "Seychelles", "Arabian Sea", "Sri Lanka", "Thailand",
               "Indonesia", "Papua New Guinea" , "Fitzroy River", "Daly River",
               "Adelaide River","Darwin Coastal", "South Alligator River",
               "East Alligator River","Blue mud Bay", "Roper River","Towns River",
               "Unknown","Wenlock River","Trinity inlet","Clarence River",
               "Sydney Harbour", "Urauchi River","Okinawa", "Fiji")

gl <- BS.dartcap.gl
gl <- gl[gl$pop != "Sierra Leone"] #only 1 sample
gl$pop <- factor(gl$other$ind.metrics$Site2, levels = pop.levels)
gl <- gl[order(gl$pop,gl$ind.names)]

gl2gpop(gl, filename = "BS_dartcap_all_genepop.txt")
bastat <- diveRsim::basicStats(infile = "BS_dartcap_all_genepop.txt",
                              outfile = "BS_dartcap_all_BasicStat_output.txt",
                              fis_ci = TRUE,ar_ci = TRUE, fis_boots = 1000,
                              ar_boots = 1000,mc_reps = 1000,
                              rarefaction = FALSE, ar_alpha = 0.05,
                              fis_alpha = 0.05)

length(bastat$main_tab)#31
gendiv <- data.frame(
  "Costa Rica" = bastat$main_tab[[1]]$overall,
  "Brazil" = bastat$main_tab[[2]]$overall,
  "Caribbean Sea" = bastat$main_tab[[3]]$overall,
  "Gulf of Mexico" = bastat$main_tab[[4]]$overall,
  "Western North Atlantic" = bastat$main_tab[[5]]$overall,
  "South Africa" = bastat$main_tab[[6]]$overall,
  "Mozambique" = bastat$main_tab[[7]]$overall,
  "Reunion" = bastat$main_tab[[8]]$overall,
  "Seychelles" = bastat$main_tab[[9]]$overall,
  "Arabian Sea" = bastat$main_tab[[10]]$overall,
  "Sri Lanka" = bastat$main_tab[[11]]$overall,
  "Thailand" = bastat$main_tab[[12]]$overall,

```

```

"Indonesia" = bastat$main_tab[[13]]$overall,
"Papua New Guinea" = bastat$main_tab[[14]]$overall,
"Fitzroy River" = bastat$main_tab[[15]]$overall,
"Daly River" = bastat$main_tab[[16]]$overall,
"Adelaide River" = bastat$main_tab[[17]]$overall,
"Darwin Coastal" = bastat$main_tab[[18]]$overall,
"South Alligator River" = bastat$main_tab[[19]]$overall,
"East Alligator River" = bastat$main_tab[[20]]$overall,
"Blue mud Bay" = bastat$main_tab[[21]]$overall,
"Roper River" = bastat$main_tab[[22]]$overall,
"Townsville River" = bastat$main_tab[[23]]$overall,
"Unknown" = bastat$main_tab[[24]]$overall,
"Wenlock River" = bastat$main_tab[[25]]$overall,
"Trinity Inlet" = bastat$main_tab[[26]]$overall,
"Clarence River" = bastat$main_tab[[27]]$overall,
"Sydney Harbour" = bastat$main_tab[[28]]$overall,
"Urauchi River" = bastat$main_tab[[29]]$overall,
"Okinawa" = bastat$main_tab[[30]]$overall,
"Fiji" = bastat$main_tab[[31]]$overall,
check.names = FALSE)
row.names(gendiv) <- rownames(bastat$main_tab[[1]])

df <- as.data.frame(gl)
df[df == "0"] <- "11"
df[df == "1"] <- "12"
df[df == "2"] <- "22"
gen.gi <- adegenet::df2genind(df, ploidy = 2, ncode = 2, pop = gl$pop)
ris_basic <- hierfstat::basic.stats(gen.gi)
fis.hierfstat <- apply(ris_basic$Fis, 2, mean, na.rm=T)
fis.CI <- hierfstat::boot.ppfis(gen.gi, nboot = 1000, quant = c(0.025,0.975),
                             diploid = TRUE,dig = 4)
df <- data.frame(fis.hierfstat,fis.CI.low = fis.CI$fis.ci[,1],
                fis.CI.high = fis.CI$fis.ci[,2])
df <- as.data.frame(t(df))
gendiv <- rbind(gendiv, df)

readr::write_tsv(gendiv, path = "DARtcap_ALL_gendiv.txt")
save(gendiv, file = "DARtcap_ALL_gendiv.Rdata")

pop.levels <- c("Costa Rica" , "Brazil", "Caribbean Sea", "Gulf of Mexico",
               "Western North Atlantic", "South Africa", "Mozambique", "Reunion" ,
               "Seychelles", "Arabian Sea", "Sri Lanka", "Thailand", "Indonesia",
               "Papua New Guinea" , "Australia", "Japan", "Fiji")
gl <- BS.dartcap.gl
gl <- gl[gl$pop != "Sierra Leone"] #only 1 sample
gl$pop <- factor(gl$other$ind.metrics$Site, levels = pop.levels)
gl <- gl[order(gl$pop,gl$ind.names)]

gl2gpop(gl, filename = "BS_dartcap_all_Sites_genepop.txt")
bastat <- diveRsimilarity::basicStats(infile = "BS_dartcap_all_Sites_genepop.txt",
                                     outfile = "BS_dartcap_all_Sites_BasicStat_output.txt",
                                     fis_ci = TRUE,ar_ci = TRUE, fis_boots = 1000,
                                     ar_boots = 1000,mc_reps = 1000,
                                     rarefaction = FALSE, ar_alpha = 0.05,
                                     fis_alpha = 0.05)

```

```

length(bastat$main_tab)#17
gendiv <- data.frame(
  "Costa Rica" = bastat$main_tab[[1]]$overall,
  "Brazil" = bastat$main_tab[[2]]$overall,
  "Caribbean Sea" = bastat$main_tab[[3]]$overall,
  "Gulf of Mexico" = bastat$main_tab[[4]]$overall,
  "Western North Atlantic" = bastat$main_tab[[5]]$overall,
  "South Africa" = bastat$main_tab[[6]]$overall,
  "Mozambique" = bastat$main_tab[[7]]$overall,
  "Reunion" = bastat$main_tab[[8]]$overall,
  "Seychelles" = bastat$main_tab[[9]]$overall,
  "Arabian Sea" = bastat$main_tab[[10]]$overall,
  "Sri Lanka" = bastat$main_tab[[11]]$overall,
  "Thailand" = bastat$main_tab[[12]]$overall,
  "Indonesia" = bastat$main_tab[[13]]$overall,
  "Papua New Guinea" = bastat$main_tab[[14]]$overall,
  "Australia" = bastat$main_tab[[15]]$overall,
  "Japan" = bastat$main_tab[[16]]$overall,
  "Fiji" = bastat$main_tab[[17]]$overall,
  check.names = FALSE)
row.names(gendiv) <- rownames(bastat$main_tab[[1]])

df <- as.data.frame(gl)
df[df == "0"] <- "11"
df[df == "1"] <- "12"
df[df == "2"] <- "22"
gen.gi <- adegenet::df2genind(df, ploidy = 2, ncode = 2, pop = gl$pop)
ris_basic <- hierfstat::basic.stats(gen.gi)
fis.hierfstat <- apply(ris_basic$Fis, 2, mean, na.rm=T)
fis.CI <- hierfstat::boot.ppfis(gen.gi, nboot = 1000, quant = c(0.025,0.975),
  diploid = TRUE,dig = 4)
df <- data.frame(fis.hierfstat,fis.CI.low = fis.CI$fis.ci[,1],
  fis.CI.high = fis.CI$fis.ci[,2])
df <- as.data.frame(t(df))
gendiv <- rbind(gendiv, df)
readr::write_tsv(gendiv, path = "DARtcap_ALL_Sites_gendiv.txt")
save(gendiv, file = "DARtcap_ALL_Sites_gendiv.Rdata")

gl <- BS.dartcap.gl
gl <- gl[!gl$other$ind.metrics$Region == "E-ATL",] #only 1 sample
gl$other$ind.metrics$Region[gl$other$ind.metrics$Region %in%
  c("W-IO","N-IO","E-IO","W-PAC","E-IO/W-PAC")] <- "IWP"
pop.levels <- c("E-PAC","W-ATL","IWP", "Japan","Fiji")
gl$pop <- factor(gl$other$ind.metrics$Region, levels = pop.levels)
gl <- gl[order(gl$pop, gl$ind.names)]

gl2gpop(gl, filename = "BS_dartcap_all_Regions_genepop.txt")
bastat <- diveRsimy::basicStats(infile = "BS_dartcap_all_Regions_genepop.txt",
  outfile = "BS_dartcap_all_Regions_BasicStat_output.txt",
  fis_ci = TRUE,ar_ci = TRUE, fis_boots = 1000,
  ar_boots = 1000,mc_reps = 1000,
  rarefaction = FALSE, ar_alpha = 0.05,
  fis_alpha = 0.05)

length(bastat$main_tab)#5
gendiv <- data.frame(

```

```

"E-PAC" = bastat$main_tab[[1]]$overall,
"W-ATL" = bastat$main_tab[[2]]$overall,
"IWP" = bastat$main_tab[[3]]$overall,
"Japan" = bastat$main_tab[[4]]$overall,
"Fiji" = bastat$main_tab[[5]]$overall,
  check.names = FALSE)
rownames(gendiv) <- rownames(bastat$main_tab[[1]])

df <- as.data.frame(gl)
df[df == "0"] <- "11"
df[df == "1"] <- "12"
df[df == "2"] <- "22"
gen.gi <- adegenet::df2genind(df, ploidy = 2, ncode = 2, pop = gl$pop)
ris_basic <- hierfstat::basic.stats(gen.gi)
fis.hierfstat <- apply(ris_basic$Fis, 2, mean, na.rm=T)
fis.CI <- hierfstat::boot.ppfis(gen.gi, nboot = 1000, quant = c(0.025,0.975),
  diploid = TRUE, dig = 4)
df <- data.frame(fis.hierfstat, fis.CI.low = fis.CI$fis.ci[,1],
  fis.CI.high = fis.CI$fis.ci[,2])
df <- as.data.frame(t(df))
gendiv <- rbind(gendiv, df)
readr::write_tsv(gendiv, path = "DARtcap_ALL_Regions_gendiv.txt")
save(gendiv, file = "DARtcap_ALL_Regions_gendiv.Rdata")

load("DARtcap_ALL_gendiv.Rdata")

shortnames <- c("COR", "BRZ", "CAR", "GOM", "WNA", "SAF", "MOZ", "RUN", "SEY",
  "ARS", "SRL", "TAI", "IND", "PNG", "FZR", "DAR")
knitr::kable(gendiv[,1:16], col.names = shortnames, digits = 4,
  caption = "Table1A") %>%
  kableExtra::kable_styling(full_width = FALSE, font_size = 5,
    latex_options = c("hold_position")) %>%
  kableExtra::landscape()

shortnames <- c("ADR", "DWC", "SAR", "EAR", "BMB", "ROR", "TOR", "UNK", "WER", "TRI",
  "CLR", "SYH", "URR", "OKI", "FIJ")
knitr::kable(gendiv[,17:31], col.names = shortnames, digits = 4,
  caption = "Table1B") %>%
  kableExtra::kable_styling(full_width = FALSE, font_size = 5,
    latex_options = c("hold_position")) %>%
  kableExtra::landscape()

load("DARtcap_ALL_Sites_gendiv.Rdata")
shortnames <- c("COR", "BRZ", "CAR", "GOM", "WNA", "SAF", "MOZ", "RUN", "SEY",
  "ARS", "SRL", "TAI", "IND", "PNG", "AUS", "JAP", "FIJ")
knitr::kable(gendiv, col.names = shortnames, digits = 4,
  caption = "Table2") %>%
  kableExtra::kable_styling(full_width = FALSE, font_size = 5,
    latex_options = c("hold_position")) %>%
  kableExtra::landscape()

load("DARtcap_ALL_Regions_gendiv.Rdata")
shortnames <- c("E-PAC", "W-ATL", "IWP", "Japan", "Fiji")
knitr::kable(gendiv, col.names = shortnames, digits = 4,
  caption = "Table3") %>%
  kableExtra::kable_styling(full_width = FALSE, font_size = 5,
    latex_options = c("hold_position"))

```

Table 12: Table1A

|               | COR     | BRZ     | CAR     | GOM     | WNA     | SAF     | MOZ     | RUN     | SEY     | ARS     | SRL     | TAI     | IND     | PNG     | FZR     | DAR     |
|---------------|---------|---------|---------|---------|---------|---------|---------|---------|---------|---------|---------|---------|---------|---------|---------|---------|
| ar            | 1.0620  | 1.0950  | 1.0650  | 1.0870  | 1.0840  | 1.1120  | 1.0860  | 1.1080  | 1.1120  | 1.1140  | 1.1100  | 1.1090  | 1.0970  | 1.1050  | 1.0830  | 1.1140  |
| size          | 15.6540 | 49.0870 | 1.9750  | 36.0400 | 7.8830  | 21.7470 | 10.2580 | 27.3810 | 35.4700 | 14.8430 | 11.8850 | 4.9650  | 3.9590  | 8.9060  | 2.9130  | 48.5170 |
| obs_het       | 0.0360  | 0.0520  | 0.0490  | 0.0480  | 0.0500  | 0.0600  | 0.0560  | 0.0590  | 0.0600  | 0.0620  | 0.0610  | 0.0660  | 0.0610  | 0.0590  | 0.0600  | 0.0600  |
| exp_het       | 0.0390  | 0.0560  | 0.0380  | 0.0530  | 0.0500  | 0.0620  | 0.0600  | 0.0620  | 0.0620  | 0.0630  | 0.0610  | 0.0590  | 0.0540  | 0.0580  | 0.0520  | 0.0630  |
| uexp_het      | 0.0410  | 0.0570  | 0.0510  | 0.0530  | 0.0540  | 0.0630  | 0.0640  | 0.0630  | 0.0630  | 0.0650  | 0.0640  | 0.0660  | 0.0610  | 0.0620  | 0.0620  | 0.0630  |
| fis           | 0.0450  | 0.0480  | -0.2930 | 0.0500  | -0.0250 | 0.0240  | 0.0520  | 0.0400  | 0.0260  | 0.0040  | -0.0050 | -0.1080 | -0.1360 | -0.0270 | -0.1750 | 0.0370  |
| hwe_glb       | 1.0000  | 1.0000  | 1.0000  | 1.0000  | 1.0000  | 1.0000  | 1.0000  | 1.0000  | 1.0000  | 1.0000  | 1.0000  | 1.0000  | 1.0000  | 1.0000  | 1.0000  | 1.0000  |
| hwe_hom       | 1.0000  | 1.0000  | 1.0000  | 1.0000  | 1.0000  | 1.0000  | 1.0000  | 1.0000  | 1.0000  | 1.0000  | 1.0000  | 1.0000  | 1.0000  | 1.0000  | 1.0000  | 1.0000  |
| hwe_het       | 1.0000  | 1.0000  | 1.0000  | 1.0000  | 1.0000  | 1.0000  | 1.0000  | 1.0000  | 1.0000  | 1.0000  | 1.0000  | 1.0000  | 1.0000  | 1.0000  | 1.0000  | 1.0000  |
| fis_lo        | -0.0030 | 0.0340  | -1.0000 | 0.0310  | -0.1350 | -0.0100 | -0.0410 | 0.0110  | 0.0030  | -0.0490 | -0.0770 | -0.3690 | -0.5470 | -0.1240 | -1.0000 | 0.0200  |
| fis_hi        | 0.0430  | 0.0520  | -0.2930 | 0.0540  | -0.0360 | 0.0190  | 0.0440  | 0.0370  | 0.0250  | -0.0030 | -0.0150 | -0.1080 | -0.1360 | -0.0370 | -0.1750 | 0.0370  |
| ar_lo         | 1.0150  | 1.0850  | 1.0330  | 1.0660  | 1.0290  | 1.0530  | 0.9640  | 1.0490  | 1.0600  | 1.0520  | 1.0490  | 1.0520  | 1.0470  | 1.0450  | 1.0060  | 1.1010  |
| ar_hi         | 1.0720  | 1.1060  | 1.0920  | 1.0990  | 1.1020  | 1.1230  | 1.1190  | 1.1220  | 1.1220  | 1.1280  | 1.1300  | 1.1290  | 1.1190  | 1.1180  | 1.1180  | 1.1240  |
| fis.hierfstat | 0.0750  | 0.0576  | -0.0481 | 0.0638  | 0.0369  | 0.0465  | 0.0959  | 0.0572  | 0.0398  | 0.0370  | 0.0356  | -0.0069 | -0.0098 | 0.0285  | -0.0006 | 0.0470  |
| fis.CI.low    | 0.0787  | 0.0694  | -0.0306 | 0.0724  | 0.0327  | 0.0467  | 0.0985  | 0.0528  | 0.0312  | 0.0273  | 0.0126  | -0.0320 | -0.0293 | 0.0192  | -0.0016 | 0.0448  |
| fis.CI.high   | 0.1376  | 0.1060  | 0.1257  | 0.1165  | 0.0984  | 0.0811  | 0.1568  | 0.0893  | 0.0606  | 0.0668  | 0.0614  | 0.0378  | 0.0551  | 0.0703  | 0.0940  | 0.0704  |



Table 13: Table1B

|               |         |         |         |         |         |         |         |         |         |         |         |         |         |         |         |
|---------------|---------|---------|---------|---------|---------|---------|---------|---------|---------|---------|---------|---------|---------|---------|---------|
|               | ADR     | DWC     | SAR     | EAR     | BMB     | ROR     | TOR     | UNK     | WER     | TRI     | CLR     | SYH     | URR     | OKI     | FIJ     |
| ar            | 1.1120  | 1.1160  | 1.1130  | 1.1110  | 1.1160  | 1.1000  | 1.1060  | 1.1080  | 1.1120  | 1.1110  | 1.1200  | 1.1130  | 1.1090  | 1.1020  | 1.0960  |
| size          | 17.8180 | 14.8180 | 87.0540 | 46.5490 | 17.7220 | 8.6150  | 9.8140  | 9.8220  | 23.6920 | 4.9410  | 81.9800 | 64.0920 | 34.5690 | 8.9080  | 23.5170 |
| obs_het       | 0.0600  | 0.0640  | 0.0600  | 0.0590  | 0.0650  | 0.0590  | 0.0590  | 0.0610  | 0.0600  | 0.0690  | 0.0650  | 0.0600  | 0.0620  | 0.0590  | 0.0570  |
| exp_het       | 0.0610  | 0.0640  | 0.0620  | 0.0610  | 0.0640  | 0.0610  | 0.0600  | 0.0610  | 0.0620  | 0.0610  | 0.0650  | 0.0630  | 0.0590  | 0.0560  | 0.0630  |
| uexp_het      | 0.0630  | 0.0670  | 0.0630  | 0.0620  | 0.0660  | 0.0650  | 0.0630  | 0.0640  | 0.0640  | 0.0680  | 0.0660  | 0.0630  | 0.0600  | 0.0600  | 0.0640  |
| fis           | 0.0120  | -0.0060 | 0.0350  | 0.0280  | -0.0060 | 0.0090  | -0.0060 | -0.0150 | 0.0250  | -0.1150 | 0.0240  | 0.0370  | -0.0130 | -0.0570 | 0.0610  |
| hwe_glb       | 1.0000  | 1.0000  | 1.0000  | 1.0000  | 1.0000  | 1.0000  | 1.0000  | 1.0000  | 1.0000  | 1.0000  | 1.0000  | 1.0000  | 1.0000  | 1.0000  | 1.0000  |
| hwe_hom       | 1.0000  | 1.0000  | 1.0000  | 1.0000  | 1.0000  | 1.0000  | 1.0000  | 1.0000  | 1.0000  | 1.0000  | 1.0000  | 1.0000  | 1.0000  | 1.0000  | 1.0000  |
| hwe_het       | 1.0000  | 1.0000  | 1.0000  | 1.0000  | 1.0000  | 1.0000  | 1.0000  | 1.0000  | 1.0000  | 1.0000  | 1.0000  | 1.0000  | 1.0000  | 1.0000  | 1.0000  |
| fis_lo        | -0.0310 | -0.0580 | 0.0260  | 0.0110  | -0.0540 | -0.0960 | -0.0920 | -0.0980 | -0.0090 | -0.3880 | 0.0110  | 0.0240  | -0.0400 | -0.1890 | 0.0260  |
| fis_hi        | 0.0050  | -0.0110 | 0.0360  | 0.0260  | -0.0110 | 0.0020  | -0.0140 | -0.0240 | 0.0220  | -0.1150 | 0.0250  | 0.0380  | -0.0180 | -0.0620 | 0.0650  |
| ar_lo         | 1.0510  | 1.0470  | 1.1040  | 1.1000  | 1.0530  | 1.0310  | 1.0470  | 1.0430  | 1.0500  | 1.0510  | 1.1090  | 1.1010  | 1.0850  | 1.0450  | 1.0220  |
| ar_hi         | 1.1240  | 1.1330  | 1.1240  | 1.1220  | 1.1340  | 1.1200  | 1.1220  | 1.1210  | 1.1220  | 1.1330  | 1.1310  | 1.1250  | 1.1210  | 1.1220  | 1.1190  |
| fis.hierfstat | 0.0392  | 0.0275  | 0.0409  | 0.0383  | 0.0212  | 0.0648  | 0.0434  | 0.0342  | 0.0456  | -0.0145 | 0.0301  | 0.0448  | 0.0006  | -0.0026 | 0.0809  |
| fis.CI.low    | 0.0338  | 0.0190  | 0.0370  | 0.0333  | 0.0034  | 0.0614  | 0.0449  | 0.0270  | 0.0441  | -0.0430 | 0.0062  | 0.0431  | -0.0440 | -0.0273 | 0.0954  |
| fis.CI.high   | 0.0695  | 0.0588  | 0.0596  | 0.0591  | 0.0410  | 0.1174  | 0.0948  | 0.0768  | 0.0744  | 0.0249  | 0.0296  | 0.0676  | -0.0057 | 0.0315  | 0.1351  |

Table 14: Table2

|               | COR     | BRZ     | CAR     | GOM     | WNA     | SAF     | MOZ     | RUN     | SEY     | ARS     | SRL     | TAI     | IND     | PNG     | AUS      | JAP     | FIJ     |
|---------------|---------|---------|---------|---------|---------|---------|---------|---------|---------|---------|---------|---------|---------|---------|----------|---------|---------|
| ar            | 1.0610  | 1.0950  | 1.0640  | 1.0860  | 1.0850  | 1.1120  | 1.0870  | 1.1090  | 1.1120  | 1.1140  | 1.1110  | 1.1100  | 1.0960  | 1.1050  | 1.1160   | 1.1100  | 1.0960  |
| size          | 15.6540 | 49.0870 | 1.9750  | 36.0400 | 7.8830  | 21.7470 | 10.2580 | 27.3810 | 35.4700 | 14.8430 | 11.8850 | 4.9650  | 3.9590  | 8.9060  | 438.3460 | 43.4770 | 23.5170 |
| obs_het       | 0.0360  | 0.0520  | 0.0490  | 0.0480  | 0.0500  | 0.0600  | 0.0560  | 0.0590  | 0.0600  | 0.0620  | 0.0610  | 0.0660  | 0.0610  | 0.0590  | 0.0610   | 0.0610  | 0.0570  |
| exp_het       | 0.0390  | 0.0560  | 0.0380  | 0.0530  | 0.0500  | 0.0620  | 0.0600  | 0.0620  | 0.0620  | 0.0630  | 0.0610  | 0.0590  | 0.0540  | 0.0580  | 0.0640   | 0.0610  | 0.0630  |
| uexp_het      | 0.0410  | 0.0570  | 0.0510  | 0.0530  | 0.0540  | 0.0630  | 0.0640  | 0.0630  | 0.0630  | 0.0650  | 0.0640  | 0.0660  | 0.0610  | 0.0620  | 0.0640   | 0.0610  | 0.0640  |
| fis           | 0.0450  | 0.0480  | -0.2930 | 0.0500  | -0.0250 | 0.0240  | 0.0520  | 0.0400  | 0.0260  | 0.0040  | -0.0050 | -0.1080 | -0.1360 | -0.0270 | 0.0430   | 0.0040  | 0.0610  |
| hwe_glb       | 1.0000  | 1.0000  | 1.0000  | 1.0000  | 1.0000  | 1.0000  | 1.0000  | 1.0000  | 1.0000  | 1.0000  | 1.0000  | 1.0000  | 1.0000  | 1.0000  | 1.0000   | 1.0000  | 1.0000  |
| hwe_hom       | 1.0000  | 1.0000  | 1.0000  | 1.0000  | 1.0000  | 1.0000  | 1.0000  | 1.0000  | 1.0000  | 1.0000  | 1.0000  | 1.0000  | 1.0000  | 1.0000  | 1.0000   | 1.0000  | 1.0000  |
| hwe_het       | 1.0000  | 1.0000  | 1.0000  | 1.0000  | 1.0000  | 1.0000  | 1.0000  | 1.0000  | 1.0000  | 1.0000  | 1.0000  | 1.0000  | 1.0000  | 1.0000  | 1.0000   | 1.0000  | 1.0000  |
| fis_lo        | -0.0090 | 0.0330  | -1.0000 | 0.0310  | -0.1450 | -0.0090 | -0.0350 | 0.0100  | 0.0020  | -0.0480 | -0.0770 | -0.3680 | -0.5470 | -0.1260 | 0.0370   | -0.0170 | 0.0260  |
| fis_hi        | 0.0440  | 0.0520  | -0.2930 | 0.0530  | -0.0340 | 0.0180  | 0.0450  | 0.0370  | 0.0250  | -0.0030 | -0.0150 | -0.1080 | -0.1360 | -0.0370 | 0.0430   | 0.0020  | 0.0640  |
| ar_lo         | 1.0130  | 1.0850  | 1.0330  | 1.0360  | 1.0290  | 1.0510  | 0.9460  | 1.0460  | 1.0600  | 1.0480  | 1.0490  | 1.0520  | 1.0470  | 1.0430  | 1.1050   | 1.0550  | 1.0220  |
| ar_hi         | 1.0710  | 1.1070  | 1.0920  | 1.0990  | 1.1020  | 1.1220  | 1.1190  | 1.1210  | 1.1210  | 1.1280  | 1.1280  | 1.1290  | 1.1190  | 1.1180  | 1.1270   | 1.1220  | 1.1190  |
| fis.hierfstat | 0.0750  | 0.0576  | -0.0481 | 0.0638  | 0.0369  | 0.0465  | 0.0959  | 0.0572  | 0.0398  | 0.0370  | 0.0356  | -0.0069 | -0.0098 | 0.0285  | 0.0440   | 0.0155  | 0.0809  |
| fis.CI.low    | 0.0785  | 0.0687  | -0.0302 | 0.0736  | 0.0321  | 0.0454  | 0.1015  | 0.0530  | 0.0328  | 0.0261  | 0.0130  | -0.0302 | -0.0282 | 0.0165  | 0.0387   | -0.0142 | 0.0969  |
| fis.CI.high   | 0.1389  | 0.1058  | 0.1227  | 0.1164  | 0.0998  | 0.0787  | 0.1564  | 0.0888  | 0.0611  | 0.0675  | 0.0610  | 0.0374  | 0.0545  | 0.0702  | 0.0544   | 0.0171  | 0.1351  |

Table 15: Table3

|               | E-PAC   | W-ATL   | IWP      | Japan   | Fiji    |
|---------------|---------|---------|----------|---------|---------|
| ar            | 1.1540  | 1.2580  | 1.3450   | 1.2800  | 1.2820  |
| size          | 15.6540 | 94.9850 | 577.7590 | 43.4770 | 23.5170 |
| obs_het       | 0.0360  | 0.0500  | 0.0610   | 0.0610  | 0.0570  |
| exp_het       | 0.0390  | 0.0550  | 0.0640   | 0.0610  | 0.0630  |
| uexp_het      | 0.0410  | 0.0550  | 0.0640   | 0.0610  | 0.0640  |
| fis           | 0.0450  | 0.0490  | 0.0460   | 0.0040  | 0.0610  |
| hwe_glb       | 1.0000  | 1.0000  | 0.0000   | 1.0000  | 1.0000  |
| hwe_hom       | 1.0000  | 1.0000  | 1.0000   | 1.0000  | 1.0000  |
| hwe_het       | 1.0000  | 1.0000  | 0.0000   | 1.0000  | 1.0000  |
| fis_lo        | -0.0070 | 0.0410  | 0.0400   | -0.0180 | 0.0270  |
| fis_hi        | 0.0440  | 0.0530  | 0.0460   | 0.0030  | 0.0630  |
| ar_lo         | 1.1380  | 1.2350  | 1.3290   | 1.2540  | 1.2520  |
| ar_hi         | 1.1690  | 1.2790  | 1.3600   | 1.3030  | 1.3090  |
| fis.hierfstat | 0.0750  | 0.0536  | 0.0472   | 0.0155  | 0.0809  |
| fis.CI.low    | 0.0781  | 0.0748  | 0.0421   | -0.0151 | 0.0955  |
| fis.CI.high   | 0.1401  | 0.1082  | 0.0579   | 0.0170  | 0.1358  |

### 8.6.1 Number of monomorphic markers per population

```

pop.levels <- c("Costa Rica" , "Brazil","Caribbean Sea","Gulf of Mexico",
  "Western North Atlantic", "Sierra Leone", "South Africa",
  "Mozambique", "Reunion" , "Seychelles", "Arabian Sea",
  "Sri Lanka", "Thailand", "Indonesia", "Papua New Guinea" ,
  "Fitzroy River", "Daly River", "Adelaide River","Darwin Coastal",
  "South Alligator River", "East Alligator River","Blue mud Bay",
  "Roper River","Town's River","Unknown","Wenlock River","Trinity inlet",
  "Clarence River", "Sydney Harbour","Okinawa", "Urauchi River", "Fiji")
BS.dartcap.gl$pop <- factor(BS.dartcap.gl$other$ind.metrics$Site2, levels = pop.levels)
monomorphics <- c()
for (i in 1:length(pop.levels)) {
  x <- BS.dartcap.gl[BS.dartcap.gl$pop == pop.levels[i]]
  x2 <- dartR::gl.filter.monomorphs(x, verbose = 0)
  locs <- adegenet::nLoc(x) - adegenet::nLoc(x2)
  monomorphics[i] <- locs
}
names(monomorphics) <- pop.levels
shortnames <- c("COR", "BRZ", "CAR", "GOM", "WNA", "SIL", "SAF", "MOZ", "RUN" ,
  "SEY", "ARS", "SRL", "TAI", "IND", "PNG" , "FZR", "DAR", "ADR",
  "DWC", "SAR", "EAR", "BMB", "ROR", "TOR", "UNK", "WER", "TRI", "CLR",
  "SYH", "URR", "OKI", "FIJ")
knitr::kable(t(as.table(monomorphics)), col.names = shortnames, digits = 4,
  caption = "") %>%
  kableExtra::kable_styling(full_width = FALSE, font_size = 5,
    latex_options = c("hold_position"))

pop.levels <- c("Costa Rica" , "Brazil","Caribbean Sea", "Gulf of Mexico",
  "Western North Atlantic", "Sierra Leone", "South Africa",
  "Mozambique", "Reunion" , "Seychelles", "Arabian Sea", "Sri Lanka",
  "Thailand", "Indonesia", "Papua New Guinea" , "Australia", "Japan",
  "Fiji")
BS.dartcap.gl$pop <- factor(BS.dartcap.gl$other$ind.metrics$Site, levels = pop.levels)
monomorphics <- c()
for (i in 1:length(pop.levels)) {
  x <- BS.dartcap.gl[BS.dartcap.gl$pop == pop.levels[i]]
  x2 <- dartR::gl.filter.monomorphs(x, verbose = 0)
  locs <- adegenet::nLoc(x) - adegenet::nLoc(x2)
  monomorphics[i] <- locs
}
names(monomorphics) <- pop.levels

```

```

shortnames <- c("COR", "BRZ", "CAR", "GOM", "WNA", "SIL", "SAF", "MOZ", "RUN",
               "SEY", "ARS", "SRL", "TAI", "IND", "PNG", "AUS", "JAP", "FIJ")
knitr::kable(t(as.table(monomorphics)), col.names = shortnames, digits = 4,
             caption = "") %>%
  kableExtra::kable_styling(full_width = FALSE, font_size = 5,
                             latex_options = c("hold_position"))

pop.levels <- c("E-PAC", "W-ATL", "E-ATL", "W-IO", "N-IO", "E-IO", "W-PAC", "E-IO/W-PAC",
               "Japan", "Fiji")
strata <- BS.dartcap.gl$other$ind.metrics$Region
strata[strata %in% c("W-IO", "N-IO", "E-IO", "W-PAC", "E-IO/W-PAC")] <- "IWP"
pop.levels <- c("E-PAC", "W-ATL", "E-ATL", "IWP", "Japan", "Fiji")
BS.dartcap.gl$pop <- factor(strata, levels = pop.levels)
monomorphics <- c()
for (i in 1:length(pop.levels)) {
  x <- BS.dartcap.gl[BS.dartcap.gl$pop == pop.levels[i]]
  x2 <- dartR::gl.filter.monomorphs(x, verbose = 0)
  locs <- adegenet::nLoc(x) - adegenet::nLoc(x2)
  monomorphics[i] <- locs
}
names(monomorphics) <- pop.levels
shortnames <- c("E-PAC", "W-ATL", "E-ATL", "IWP", "Japan", "Fiji")
knitr::kable(t(as.table(monomorphics)), col.names = shortnames, digits = 4,
             caption = "") %>%
  kableExtra::kable_styling(full_width = FALSE, font_size = 5,
                             latex_options = c("hold_position"))

```

Table 16:

| COR  | BRZ  | CAR  | GOM  | WNA  | SIL  | SAF  | MOZ  | RUN  | SEY  | ARS  | SRL  | TAI  | IND  | PNG  | FZR  | DAR  | ADR  | DWC  | SA  |
|------|------|------|------|------|------|------|------|------|------|------|------|------|------|------|------|------|------|------|-----|
| 2562 | 1771 | 2811 | 2075 | 2512 | 3340 | 2081 | 2443 | 2010 | 1914 | 2195 | 2353 | 2699 | 2835 | 2512 | 2914 | 1727 | 2178 | 2204 | 136 |

Table 17:

| COR  | BRZ  | CAR  | GOM  | WNA  | SIL  | SAF  | MOZ  | RUN  | SEY  | ARS  | SRL  | TAI  | IND  | PNG  | AUS | JAP  | FIJ  |
|------|------|------|------|------|------|------|------|------|------|------|------|------|------|------|-----|------|------|
| 2562 | 1771 | 2811 | 2075 | 2512 | 3340 | 2081 | 2443 | 2010 | 1914 | 2195 | 2353 | 2699 | 2835 | 2512 | 395 | 1969 | 2114 |

Table 18:

| E-PAC | W-ATL | E-ATL | IWP | Japan | Fiji |
|-------|-------|-------|-----|-------|------|
| 2562  | 1370  | 3340  | 301 | 1969  | 2114 |

## 8.6.2 Nucleotide diversity and inbreeding

```

pi.sum <- radiator::pi(
  data = BS.dartcap.tidy,
  read.length = 70,
  parallel.core = parallel::detectCores() - 1,
  path.folder = NULL,
  verbose = TRUE
)

BS.dartcap.tidy2 <- BS.dartcap.tidy
BS.dartcap.tidy2$POP_ID <- as.character(BS.dartcap.tidy2$POP_ID)
unique(BS.dartcap.tidy2$POP_ID)

```

```

BS.dartcap.tidy2$POP_ID[BS.dartcap.tidy2$POP_ID %in% c("Fitzroy_River",
  "Daly_River", "Adelaide_River",
  "Darwin_Coastal",
  "South_Alligator_River",
  "East_Alligator_River",
  "Blue_mud_Bay", "Roper_River",
  "Towns_River", "Unknown",
  "Wenlock_River", "Trinity_inlet",
  "Clarence_River",
  "Sydney_Harbour")] <- "Australia"
BS.dartcap.tidy2$POP_ID[BS.dartcap.tidy2$POP_ID %in% c("Okinawa",
  "Urauchi_River")] <- "Japan"

pop.levels <- c("Costa_Rica" , "Brazil", "Caribbean_Sea", "Gulf_of_Mexico",
  "Western_North_Atlantic", "Sierra_Leone", "South_Africa",
  "Mozambique", "Reunion" , "Seychelles", "Arabian_Sea",
  "Sri_Lanka", "Thailand", "Indonesia", "Papua_New_Guinea" ,
  "Australia", "Japan", "Fiji")
BS.dartcap.tidy2$POP_ID <- factor(BS.dartcap.tidy2$POP_ID, levels = pop.levels)
BS.dartcap.tidy2 <- BS.dartcap.tidy2[order(BS.dartcap.tidy2$POP_ID,
  BS.dartcap.tidy2$INDIVIDUALS),]

pi.sum.site <- radiator::pi(
  data = BS.dartcap.tidy2,
  read.length = 70,
  parallel.core = parallel::detectCores() - 1,
  path.folder = NULL,
  verbose = TRUE
)

BS.dartcap.tidy3 <- BS.dartcap.tidy2
BS.dartcap.tidy3$POP_ID <- as.character(BS.dartcap.tidy3$POP_ID)
BS.dartcap.tidy3$POP_ID[BS.dartcap.tidy3$POP_ID %in% c("Costa_Rica")] <- "E-PAC"
BS.dartcap.tidy3$POP_ID[BS.dartcap.tidy3$POP_ID %in% c("Brazil", "Caribbean_Sea",
  "Gulf_of_Mexico",
  "Western_North_Atlantic")] <- "W-ATL"
BS.dartcap.tidy3$POP_ID[BS.dartcap.tidy3$POP_ID %in% c("Sierra_Leone")] <- "E-ATL"
BS.dartcap.tidy3$POP_ID[BS.dartcap.tidy3$POP_ID %in% c("South_Africa", "Mozambique",
  "Reunion" , "Seychelles",
  "Arabian_Sea", "Sri_Lanka",
  "Thailand", "Indonesia",
  "Papua_New_Guinea" ,
  "Australia")] <- "IWP"
BS.dartcap.tidy3$POP_ID[BS.dartcap.tidy3$POP_ID %in% c("Okinawa",
  "Urauchi_River")] <- "Japan"
pop.levels <- c("E-PAC", "W-ATL", "E-ATL", "IWP", "Japan", "Fiji")
BS.dartcap.tidy3$POP_ID <- factor(BS.dartcap.tidy3$POP_ID, levels = pop.levels)
BS.dartcap.tidy3 <- BS.dartcap.tidy3[order(BS.dartcap.tidy3$POP_ID,
  BS.dartcap.tidy3$INDIVIDUALS),]

pi.sum.Region <- radiator::pi(
  data = BS.dartcap.tidy3,
  read.length = 70,
  parallel.core = parallel::detectCores() - 1,
  path.folder = NULL,
  verbose = TRUE
)

```

```

)

FIS.sum<- radiator::ibdg_fh(data = BS.dartcap.tidy,
  path.folder = NULL, verbose = TRUE)

save(pi.sum,pi.sum.site,pi.sum.Region, FIS.sum,
  file = "DarTcap_ALL_pi_FIS_Sites2.Rdata")

load("DarTcap_ALL_pi_FIS_Sites2.Rdata")
pi.sum$boxplot.pi

```

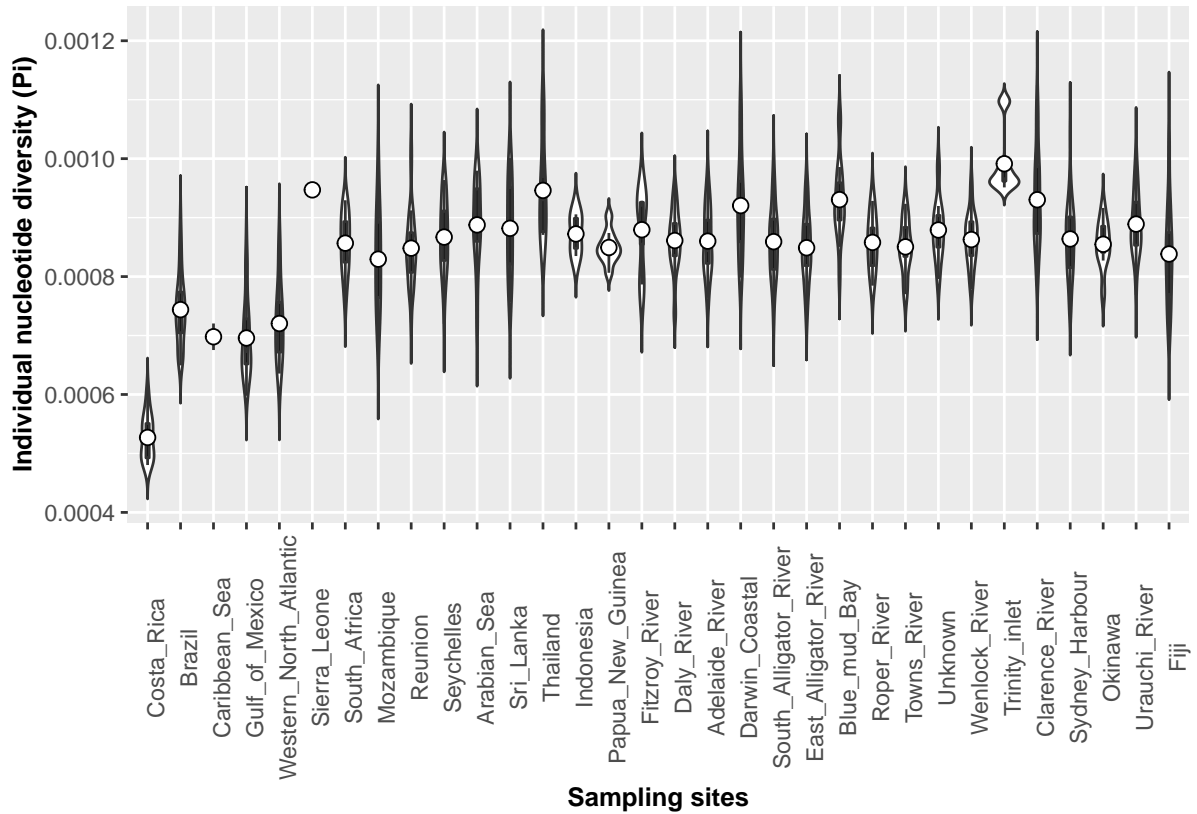

```

pi.sum.site$boxplot.pi

```

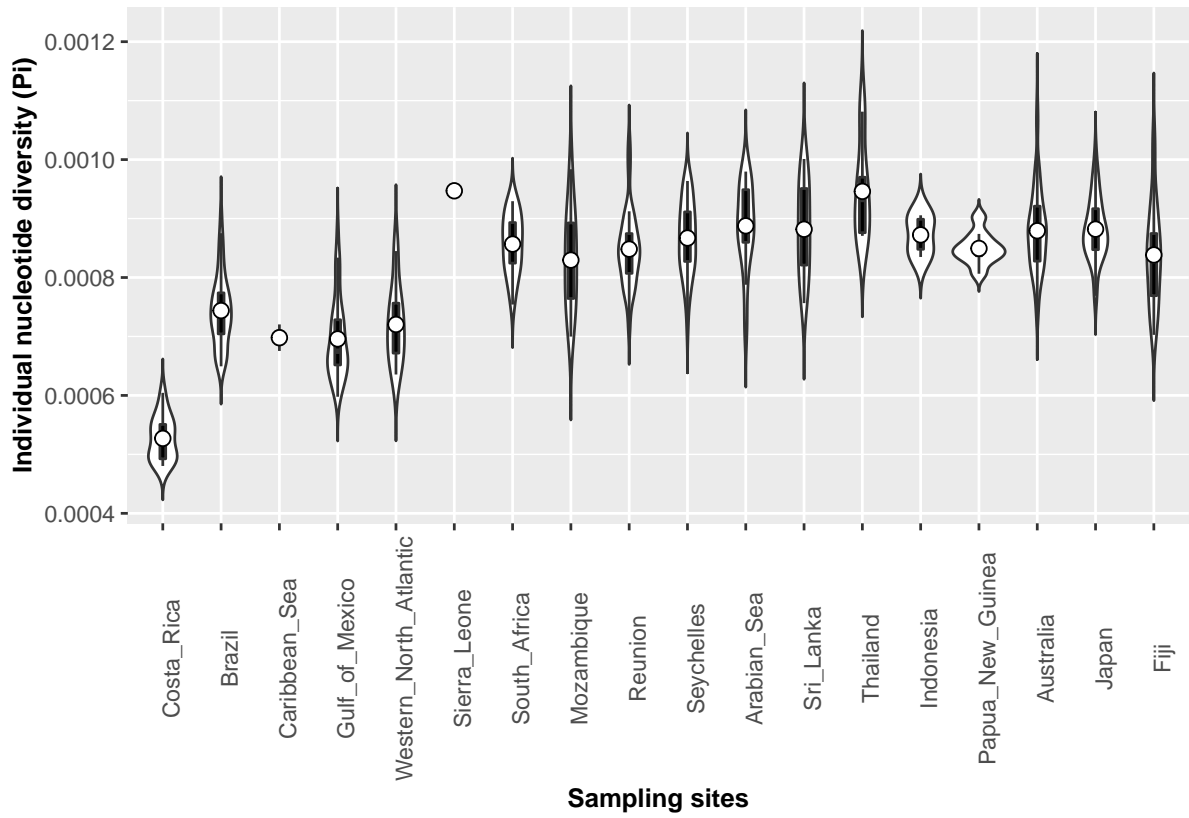

```
pi.sum.Region$boxplot.pi
```

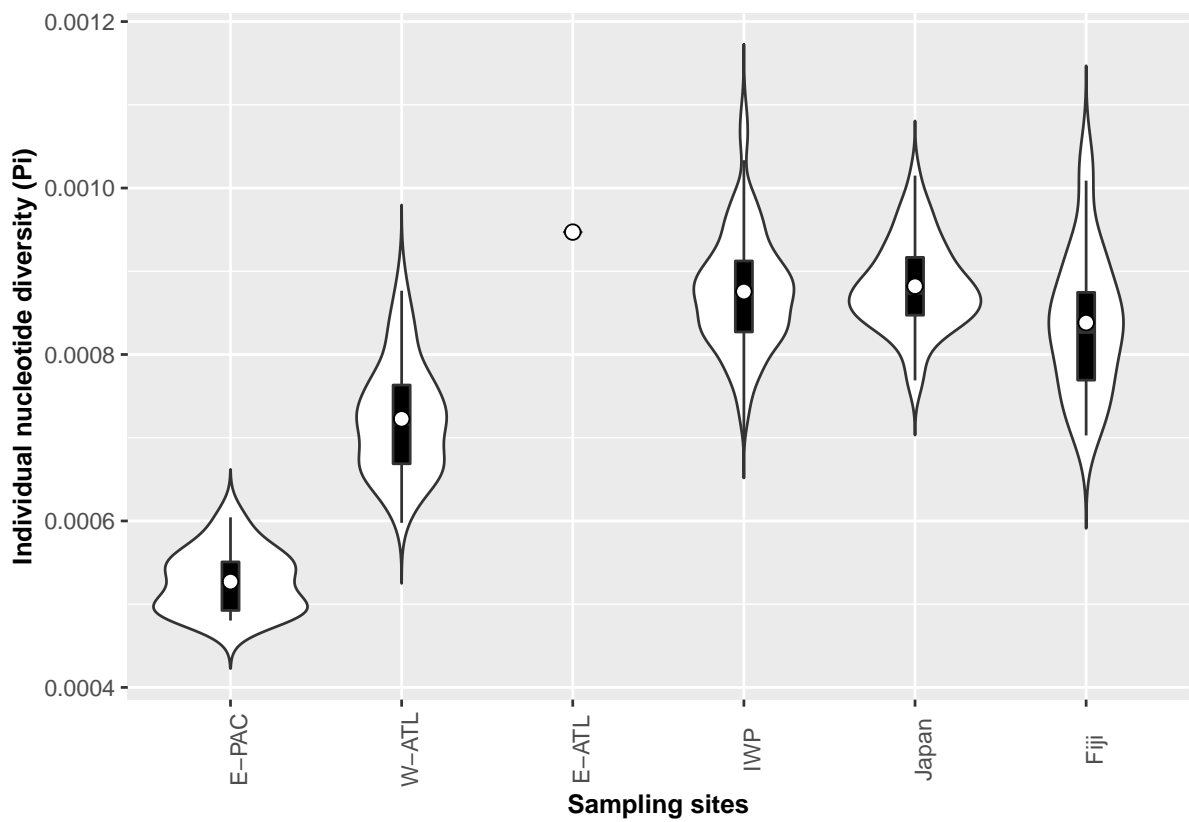

```
FIS.sum$fh.box.plot
```

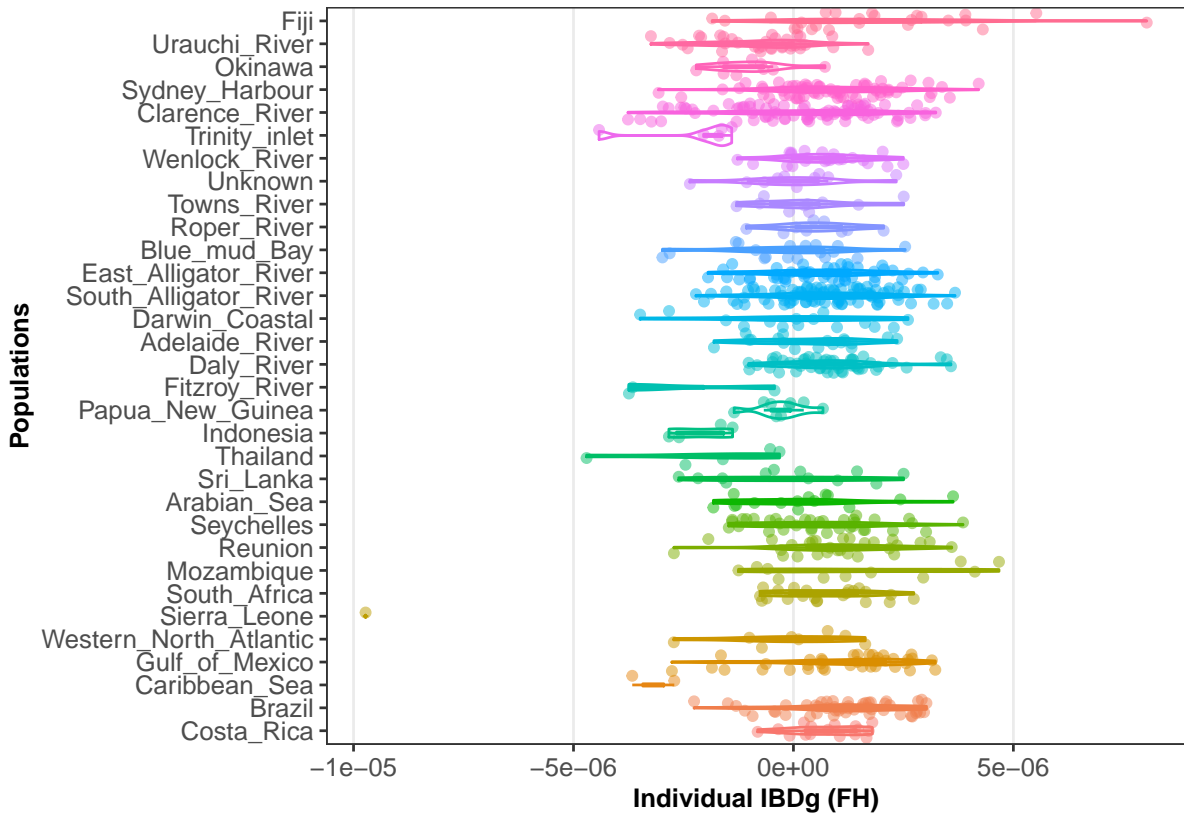

## 8.7 Genetic differentiation

### 8.7.1 Fst per location

```
Fst.gt <- strataG::popStructTest(
  BS.dartcap.gt,
  nrep = 1000,
  stats = "all",
  type = "pairwise",
  keep.null = FALSE,
  quietly = TRUE,
  nb.cores = parallel::detectCores() - 1,
  write.output = FALSE
)
save(Fst.gt, file = "DarTcap_ALL_FST_Sites2.Rdata")
readr::write_tsv(Fst.gt$pairwise$result, path = "DarTcap_ALL_FST_Sites2.txt")

load("DarTcap_ALL_FST_Sites2.Rdata")
kableExtra::kbl(
  Fst.gt$pairwise$result[order(Fst.gt$pairwise$result$Fst,
    decreasing = TRUE),
    -c(1:4)], digits = 4,
  caption = "Pairwise Fst for 3443 DarTcap loci between the all locations",
  longtable = TRUE, booktabs = TRUE) %>%
  kableExtra::kable_styling(full_width = FALSE, font_size = 5,
    latex_options = c("repeat_header", "hold_position")) %>%
  kableExtra::landscape()

pop.levels1 <- c("Costa_Rica", "Brazil", "Caribbean_Sea", "Gulf_of_Mexico",
  "Western_North_Atlantic", "Sierra_Leone", "South_Africa",
  "Mozambique", "Reunion", "Seychelles", "Arabian_Sea", "Sri_Lanka",
```



```

"Thailand", "Indonesia", "Papua_New_Guinea" , "Fitzroy_River",
"Daly_River", "Adelaide_River", "Darwin_Coastal",
"South_Alligator_River", "East_Alligator_River", "Blue_mud_Bay",
"Roper_River", "Towns_River", "Unknown", "Wenlock_River",
"Trinity_inlet", "Clarence_River", "Sydney_Harbour", "Okinawa",
"Urauchi_River", "Fiji")

m2 <- Fst.gt$pairwise$result[order(match(
  Fst.gt$pairwise$result$strata.1, pop.levels1)), c(1,2,11)]
Gdf <- igraph::graph.data.frame(m2, directed = FALSE)
m2.1 <- igraph::as_adjacency_matrix(Gdf, names = TRUE, sparse = FALSE,
  attr = "Fst", type = 'lower')

m2 <- Fst.gt$pairwise$result[order(match(
  Fst.gt$pairwise$result$strata.1, pop.levels1)), c(1,2,12)]
Gdf <- igraph::graph.data.frame(m2, directed = FALSE)
m2.2 <- igraph::as_adjacency_matrix(Gdf, names = TRUE, sparse = FALSE,
  attr = "Fst.p.val", type = 'lower')
m2$Fst.p.adj <- p.adjust(m2$Fst.p.val, "bonferroni")
Gdf <- igraph::graph.data.frame(m2, directed = FALSE)
m2.3 <- igraph::as_adjacency_matrix(Gdf, names = TRUE, sparse = FALSE,
  attr = "Fst.p.adj", type = 'lower')

write.csv(m2.1, file = "DARtcap_ALL_FST_Sites2.csv")
write.csv(m2.2, file = "DARtcap_ALL_FST_Pval_Sites2.csv")
write.csv(m2.3, file = "DARtcap_ALL_FST_Pval_bonferroni_Sites2.csv")

```





















Table 19: Pairwise Fst for 3443 DArTcap loci between the all locations (continued)

|                                                 | Chi2       | Chi2.p.val | D      | D.p.val | Fis       | Fis.p.val | Fst     | Fst.p.val | F'st    | F'st.p.val | Gst    | Gst.p.val | G'st   | G'st.p.val | G''st  | G''st.p.val |
|-------------------------------------------------|------------|------------|--------|---------|-----------|-----------|---------|-----------|---------|------------|--------|-----------|--------|------------|--------|-------------|
| Mozambique (11) v. Thailand (5)                 | 1270.4968  | 0.5125     | 0.0001 | 0.5764  | -134.4816 | 0.1924    | -0.0027 | 0.7163    | -0.0029 | 0.7133     | 0.8477 | 0.9946    | 0.8568 | 0.9946     | 0.9225 | 0.9225      |
| Fitzroy_River (3) v. Wenlock_River (24)         | 1443.6321  | 0.7393     | 0.0001 | 0.4186  | NA        | NA        | -0.0034 | 0.7015    | NA      | NA         | NA     | NA        | NA     | NA         | NA     | NA          |
| Adelaide_River (18) v. Fitzroy_River (3)        | 1339.0776  | 0.7542     | 0.0001 | 0.5734  | NA        | NA        | -0.0045 | 0.7262    | -0.0048 | 0.7262     | NA     | NA        | NA     | NA         | NA     | NA          |
| Caribbean_Sea (2) v. Western_North_Atlantic (8) | 794.9991   | 0.6713     | 0.0001 | 0.4815  | NA        | NA        | -0.0077 | 1.0000    | -0.0083 | 1.0000     | NA     | NA        | NA     | NA         | NA     | NA          |
| Fitzroy_River (3) v. Mozambique (11)            | 1190.3368  | 0.7253     | 0.0001 | 0.9980  | NA        | NA        | -0.0093 | 0.8500    | NA      | NA         | NA     | NA        | NA     | NA         | NA     | NA          |
| Adelaide_River (18) v. Indonesia (4)            | 1529.8090  | 0.0579     | 0.0001 | 0.0200  | NA        | NA        | NA      | NA        | NA      | NA         | NA     | NA        | NA     | NA         | NA     | NA          |
| Blue_mud_Bay (18) v. Indonesia (4)              | 1605.8387  | 0.1548     | 0.0001 | 0.1039  | NA        | NA        | NA      | NA        | NA      | NA         | NA     | NA        | NA     | NA         | NA     | NA          |
| Clarence_River (83) v. Indonesia (4)            | 2448.1851  | 0.0969     | 0.0001 | 0.0100  | NA        | NA        | NA      | NA        | NA      | NA         | NA     | NA        | NA     | NA         | NA     | NA          |
| Daly_River (49) v. Indonesia (4)                | 2154.7460  | 0.0120     | 0.0001 | 0.0160  | NA        | NA        | NA      | NA        | NA      | NA         | NA     | NA        | NA     | NA         | NA     | NA          |
| Fiji (25) v. Indonesia (4)                      | 2319.4034  | 0.0010     | 0.0002 | 0.0010  | NA        | NA        | NA      | NA        | NA      | NA         | NA     | NA        | NA     | NA         | NA     | NA          |
| Fitzroy_River (3) v. Gulf_of_Mexico (37)        | 28427.3648 | 0.0010     | 0.0204 | 0.0010  | NA        | NA        | NA      | NA        | NA      | NA         | NA     | NA        | NA     | NA         | NA     | NA          |
| Fitzroy_River (3) v. Seychelles (36)            | 1759.9167  | 0.1069     | 0.0001 | 0.3027  | NA        | NA        | NA      | NA        | NA      | NA         | NA     | NA        | NA     | NA         | NA     | NA          |
| Fitzroy_River (3) v. Towns_River (10)           | 1212.9971  | 0.1738     | 0.0001 | 0.3506  | NA        | NA        | NA      | NA        | NA      | NA         | NA     | NA        | NA     | NA         | NA     | NA          |
| Fitzroy_River (3) v. Unknown (10)               | 1163.6953  | 0.2967     | 0.0001 | 0.3666  | NA        | NA        | NA      | NA        | NA      | NA         | NA     | NA        | NA     | NA         | NA     | NA          |
| Fitzroy_River (3) v. Urauchi_River (35)         | 2762.4915  | 0.0010     | 0.0003 | 0.0110  | NA        | NA        | NA      | NA        | NA      | NA         | NA     | NA        | NA     | NA         | NA     | NA          |
| Indonesia (4) v. South_Africa (22)              | 1619.1846  | 0.0649     | 0.0001 | 0.0430  | NA        | NA        | NA      | NA        | NA      | NA         | NA     | NA        | NA     | NA         | NA     | NA          |
| Indonesia (4) v. South_Alligator_River (88)     | 2672.4750  | 0.0050     | 0.0001 | 0.0180  | NA        | NA        | NA      | NA        | NA      | NA         | NA     | NA        | NA     | NA         | NA     | NA          |
| Indonesia (4) v. Sydney_Harbour (65)            | 2370.0346  | 0.0040     | 0.0001 | 0.0050  | NA        | NA        | NA      | NA        | NA      | NA         | NA     | NA        | NA     | NA         | NA     | NA          |
| Indonesia (4) v. Urauchi_River (35)             | 2861.7966  | 0.0010     | 0.0003 | 0.0010  | NA        | NA        | NA      | NA        | NA      | NA         | NA     | NA        | NA     | NA         | NA     | NA          |

## 8.7.2 Fst per Site

```
strata <- BS.dartcap.gt@schemes$Site
names(strata) <- BS.dartcap.gt@schemes$INDIVIDUALS
strataG::setStrata(BS.dartcap.gt) <- strata

Fst.gt <- strataG::popStructTest(
  BS.dartcap.gt,
  nrep = 1000,
  stats = "all",
  type = "pairwise",
  keep.null = FALSE,
  quietly = TRUE,
  nb.cores = parallel::detectCores() - 1,
  write.output = FALSE
)
save(Fst.gt, file = "DARtcap_ALL_FST_Sites.Rdata")
readr::write_tsv(Fst.gt$pairwise$result, path = "DARtcap_ALL_FST_Sites.txt")

load("DARtcap_ALL_FST_Sites.Rdata")
kableExtra::kbl(Fst.gt$pairwise$result[order(Fst.gt$pairwise$result$Fst,
                                             decreasing = TRUE),
                                             -c(1:4)], digits = 4,
  caption = "Pairwise Fst for 3443 DARtcap loci between the all sites",
  longtable = TRUE, booktabs = TRUE) %>%
  kableExtra::kable_styling(full_width = FALSE, font_size = 5,
    latex_options = c("repeat_header", "hold_position")) %>%
  kableExtra::landscape()

pop.levels1 <- c("Costa_Rica", "Brazil", "Caribbean_Sea", "Gulf_of_Mexico",
  "Western_North_Atlantic", "Sierra_Leone", "South_Africa",
  "Mozambique", "Reunion", "Seychelles", "Arabian_Sea",
  "Sri_Lanka", "Thailand", "Indonesia", "Papua_New_Guinea",
  "Australia", "Japan", "Fiji")
m2 <- Fst.gt$pairwise$result[order(match(Fst.gt$pairwise$result$strata.1,
                                         pop.levels1)), c(1,2,11)]
Gdf <- igraph::graph.data.frame(m2, directed = FALSE)
m2.1 <- igraph::as_adjacency_matrix(Gdf, names = TRUE, sparse = FALSE,
  attr = "Fst", type = 'lower')

m2 <- Fst.gt$pairwise$result[order(match(Fst.gt$pairwise$result$strata.1,
                                         pop.levels1)), c(1,2,12)]
Gdf <- igraph::graph.data.frame(m2, directed = FALSE)
m2.2 <- igraph::as_adjacency_matrix(Gdf, names = TRUE, sparse = FALSE,
  attr = "Fst.p.val", type = 'lower')
m2$Fst.p.adj <- p.adjust(m2$Fst.p.val, "bonferroni")
Gdf <- igraph::graph.data.frame(m2, directed = FALSE)
m2.3 <- igraph::as_adjacency_matrix(Gdf, names = TRUE, sparse = FALSE,
  attr = "Fst.p.adj", type = 'lower')

write.csv(m2.1, file = "DARtcap_ALL_FST_Sites.csv")
write.csv(m2.2, file = "DARtcap_ALL_FST_Pval_Sites.csv")
write.csv(m2.3, file = "DARtcap_ALL_FST_Pval_bonferroni_Sites.csv")
```





Table 20: Pairwise Fst for 3443 DArTcap loci between the all sites (*continued*)

|                                                   | Chi2      | Chi2.p.val | D      | D.p.val | Fis       | Fis.p.val | Fst     | Fst.p.val | F'st    | F'st.p.val | Gst     | Gst.p.val | G'st    | G'st.p.val | G''st  | G''st.p.val |
|---------------------------------------------------|-----------|------------|--------|---------|-----------|-----------|---------|-----------|---------|------------|---------|-----------|---------|------------|--------|-------------|
| Mozambique (11) v. Papua New Guinea (9)           | 1470.3666 | 0.0100     | 0.0001 | 0.1289  | -28.1255  | 0.8661    | 0.0111  | 0.0030    | 0.0120  | 0.0030     | 0.4506  | 0.0849    | 0.4728  | 0.0819     | 0.6365 | 0.0819      |
| Indonesia (4) v. Sri Lanka (12)                   | 1349.5519 | 0.1608     | 0.0001 | 0.0909  | NA        | NA        | 0.0108  | 0.0829    | NA      | NA         | NA      | NA        | NA      | NA         | NA     | NA          |
| Arabian Sea (15) v. Papua New Guinea (9)          | 1609.9884 | 0.0529     | 0.0001 | 0.0220  | -17.7297  | 0.9990    | 0.0067  | 0.3060    | 0.0072  | 0.0060     | 0.2995  | 0.0010    | 0.3207  | 0.0010     | 0.4772 | 0.0010      |
| Papua New Guinea (9) v. Reunion (28)              | 1803.8110 | 0.0240     | 0.0001 | 0.0100  | -14.0484  | 0.8282    | 0.0058  | 0.0260    | 0.0064  | 0.0260     | 0.2185  | 0.1838    | 0.2368  | 0.1858     | 0.3736 | 0.1858      |
| Mozambique (11) v. Reunion (28)                   | 1869.1632 | 0.0150     | 0.0001 | 0.0360  | -12.9534  | 0.9880    | 0.0054  | 0.0280    | 0.0059  | 0.0290     | 0.1939  | 0.0040    | 0.2114  | 0.0040     | 0.3395 | 0.0040      |
| Australia (444) v. Reunion (28)                   | 4038.8765 | 0.0010     | 0.0000 | 0.0010  | -1.7006   | 0.4815    | 0.0052  | 0.0010    | 0.0056  | 0.0010     | 0.0112  | 0.0010    | 0.0127  | 0.0010     | 0.0236 | 0.0010      |
| Mozambique (11) v. Seychelles (36)                | 1974.2569 | 0.0010     | 0.0001 | 0.0100  | -11.9120  | 0.9870    | 0.0051  | 0.0040    | 0.0056  | 0.0040     | 0.1714  | 0.0010    | 0.1876  | 0.0010     | 0.3065 | 0.0010      |
| Brazil (50) v. Gulf of Mexico (37)                | 2325.3566 | 0.0010     | 0.0000 | 0.0190  | -8.6882   | 1.0000    | 0.0049  | 0.0010    | 0.0053  | 0.0010     | 0.0536  | 0.0010    | 0.0593  | 0.0010     | 0.1071 | 0.0010      |
| Reunion (28) v. Seychelles (36)                   | 2239.8359 | 0.0010     | 0.0000 | 0.0040  | -8.4873   | 0.9930    | 0.0048  | 0.0010    | 0.0052  | 0.0010     | 0.0685  | 0.0010    | 0.0766  | 0.0010     | 0.1358 | 0.0010      |
| Seychelles (36) v. Thailand (5)                   | 1919.1018 | 0.0030     | 0.0001 | 0.0749  | -19.2828  | 0.0160    | 0.0046  | 0.1049    | 0.0049  | 0.1059     | 0.3739  | 0.9790    | 0.3967  | 0.9790     | 0.5609 | 0.9790      |
| Australia (444) v. Mozambique (11)                | 3639.2817 | 0.0579     | 0.0000 | 0.0210  | -1.8496   | 0.1159    | 0.0044  | 0.0010    | 0.0047  | 0.0010     | 0.0271  | 0.0010    | 0.0306  | 0.0010     | 0.0561 | 0.0010      |
| Papua New Guinea (9) v. Thailand (5)              | 1272.2324 | 0.0410     | 0.0001 | 0.2567  | -944.1888 | 0.3776    | 0.0044  | 0.1998    | 0.0047  | 0.1998     | 0.9760  | 0.9560    | 0.9775  | 0.9560     | 0.9886 | 0.9560      |
| Papua New Guinea (9) v. Sri Lanka (12)            | 1411.8786 | 0.2368     | 0.0001 | 0.1768  | -22.9494  | 0.9411    | 0.0042  | 0.0849    | 0.0045  | 0.0849     | 0.3760  | 0.0480    | 0.3980  | 0.0470     | 0.5625 | 0.0470      |
| Papua New Guinea (9) v. Seychelles (36)           | 1790.9361 | 0.0749     | 0.0001 | 0.0150  | -13.0189  | 0.8761    | 0.0042  | 0.0340    | 0.0046  | 0.0340     | 0.1953  | 0.0649    | 0.2125  | 0.0699     | 0.3412 | 0.0679      |
| Arabian Sea (15) v. Mozambique (11)               | 1666.5157 | 0.0699     | 0.0001 | 0.2727  | -15.7147  | 1.0000    | 0.0041  | 0.0380    | 0.0045  | 0.0360     | 0.2620  | 0.0010    | 0.2825  | 0.0010     | 0.4315 | 0.0010      |
| Brazil (50) v. Western North Atlantic (8)         | 1764.9563 | 0.6284     | 0.0000 | 0.3706  | -14.8037  | 0.9958    | 0.0037  | 0.0884    | 0.0040  | 0.0884     | 0.2265  | 0.0063    | 0.2430  | 0.0073     | 0.3828 | 0.0063      |
| Reunion (28) v. South Africa (22)                 | 2046.1101 | 0.0040     | 0.0000 | 0.0020  | -9.3965   | 0.8252    | 0.0033  | 0.0230    | 0.0036  | 0.0230     | 0.0929  | 0.0420    | 0.1032  | 0.0400     | 0.1794 | 0.0420      |
| Mozambique (11) v. Sri Lanka (12)                 | 1510.9759 | 0.1429     | 0.0001 | 0.1918  | -19.8424  | 0.9980    | 0.0033  | 0.0889    | 0.0036  | 0.0919     | 0.3304  | 0.0020    | 0.3523  | 0.0020     | 0.5132 | 0.0020      |
| Reunion (28) v. Sri Lanka (12)                    | 1944.4230 | 0.0060     | 0.0000 | 0.1459  | -11.5330  | 0.3926    | 0.0032  | 0.0809    | 0.0034  | 0.0819     | 0.1553  | 0.3966    | 0.1704  | 0.3886     | 0.2819 | 0.3896      |
| Reunion (28) v. Thailand (5)                      | 1867.7590 | 0.0110     | 0.0001 | 0.0679  | -21.9852  | 0.0190    | 0.0030  | 0.2380    | 0.0032  | 0.2420     | 0.4139  | 0.9790    | 0.4368  | 0.9770     | 0.6017 | 0.9780      |
| Papua New Guinea (9) v. South Africa (22)         | 1596.4856 | 0.3367     | 0.0001 | 0.0320  | -15.4042  | 0.9610    | 0.0020  | 0.2168    | 0.0022  | 0.2168     | 0.2440  | 0.0559    | 0.2633  | 0.0579     | 0.4078 | 0.0569      |
| Arabian Sea (15) v. South Africa (22)             | 1883.4848 | 0.0050     | 0.0000 | 0.1908  | -10.8150  | 0.3726    | 0.0020  | 0.0909    | 0.0022  | 0.0909     | 0.1385  | 0.1888    | 0.1526  | 0.1708     | 0.2557 | 0.1788      |
| Arabian Sea (15) v. Reunion (28)                  | 2088.8182 | 0.0010     | 0.0000 | 0.0879  | -9.9971   | 0.1678    | 0.0019  | 0.1419    | 0.0021  | 0.1409     | 0.1199  | 0.4795    | 0.1326  | 0.4595     | 0.2255 | 0.4665      |
| Australia (444) v. Papua New Guinea (9)           | 2714.5893 | 0.9471     | 0.0001 | 0.0200  | -1.9646   | 0.9720    | 0.0018  | 0.1179    | 0.0020  | 0.1179     | 0.0301  | 0.0340    | 0.0339  | 0.0360     | 0.0621 | 0.0350      |
| Arabian Sea (15) v. Australia (444)               | 4448.0192 | 0.0010     | 0.0000 | 0.2068  | -1.7288   | 0.2877    | 0.0018  | 0.0220    | 0.0020  | 0.0220     | 0.0164  | 0.0679    | 0.0186  | 0.0629     | 0.0345 | 0.0659      |
| Brazil (50) v. Caribbean Sea (2)                  | 1530.3572 | 0.8222     | 0.0002 | 0.2847  | 14.5573   | 1.0000    | 0.0016  | 0.6250    | 0.0017  | 0.6250     | 7.5662  | 0.7500    | 6.9471  | 0.7500     | 1.6942 | 0.7500      |
| Australia (444) v. Seychelles (36)                | 3423.0674 | 0.0629     | 0.0000 | 0.0030  | -1.6820   | 0.9201    | 0.0015  | 0.0010    | 0.0016  | 0.0010     | 0.0074  | 0.0010    | 0.0084  | 0.0010     | 0.0157 | 0.0010      |
| Australia (444) v. Thailand (5)                   | 3817.6280 | 0.0689     | 0.0001 | 0.2008  | -2.0420   | 0.2420    | 0.0014  | 0.3150    | 0.0015  | 0.3150     | 0.0537  | 0.6390    | 0.0603  | 0.6140     | 0.1082 | 0.6280      |
| Mozambique (11) v. South Africa (22)              | 1659.7194 | 0.4166     | 0.0000 | 0.6663  | -13.9204  | 0.9950    | 0.0012  | 0.2757    | 0.0013  | 0.2817     | 0.2138  | 0.0010    | 0.2321  | 0.0010     | 0.3674 | 0.0010      |
| Arabian Sea (15) v. Seychelles (36)               | 2112.8080 | 0.0010     | 0.0000 | 0.2068  | -9.4415   | 0.0899    | 0.0011  | 0.1848    | 0.0012  | 0.1848     | 0.1051  | 0.6304    | 0.1166  | 0.6114     | 0.2006 | 0.6184      |
| Australia (444) v. South Africa (22)              | 3405.3277 | 0.1139     | 0.0000 | 0.1588  | -1.7372   | 0.4146    | 0.0008  | 0.1209    | 0.0008  | 0.1209     | 0.0112  | 0.1239    | 0.0127  | 0.1259     | 0.0237 | 0.1239      |
| Australia (444) v. Sri Lanka (12)                 | 3481.5843 | 0.1319     | 0.0000 | 0.3037  | -1.8199   | 0.7053    | 0.0005  | 0.3127    | 0.0006  | 0.3127     | 0.0206  | 0.2967    | 0.0232  | 0.2947     | 0.0429 | 0.2967      |
| South Africa (22) v. Sri Lanka (12)               | 1719.7177 | 0.1728     | 0.0000 | 0.4416  | -12.4584  | 0.4905    | 0.0005  | 0.3646    | 0.0006  | 0.3656     | 0.1750  | 0.4675    | 0.1913  | 0.4615     | 0.3118 | 0.4625      |
| Seychelles (36) v. South Africa (22)              | 1996.9972 | 0.0390     | 0.0000 | 0.3746  | -8.8703   | 0.2807    | 0.0005  | 0.3297    | 0.0005  | 0.3297     | 0.0784  | 0.4765    | 0.0874  | 0.4695     | 0.1538 | 0.4735      |
| Seychelles (36) v. Sri Lanka (12)                 | 1903.3093 | 0.0210     | 0.0000 | 0.1598  | -10.7907  | 0.2507    | 0.0002  | 0.4555    | 0.0002  | 0.4555     | 0.1362  | 0.7572    | 0.1499  | 0.7542     | 0.2518 | 0.7542      |
| Gulf of Mexico (37) v. Western North Atlantic (8) | 1571.2543 | 0.1748     | 0.0000 | 0.4486  | -21.7644  | 0.2218    | -0.0002 | 0.4883    | -0.0002 | 0.4883     | 0.3086  | 0.7946    | 0.3267  | 0.7923     | 0.4855 | 0.7934      |
| Sri Lanka (12) v. Thailand (5)                    | 1360.2400 | 0.1818     | 0.0001 | 0.7233  | -60.7430  | 0.1041    | -0.0005 | 0.5654    | -0.0006 | 0.5654     | 0.7015  | 0.9009    | 0.7177  | 0.9009     | 0.8341 | 0.9009      |
| Arabian Sea (15) v. Sri Lanka (12)                | 1614.4357 | 0.5245     | 0.0000 | 0.4935  | -13.9062  | 0.4885    | -0.0014 | 0.7622    | -0.0015 | 0.7622     | 0.2158  | 0.7113    | 0.2344  | 0.7153     | 0.3703 | 0.7143      |
| South Africa (22) v. Thailand (5)                 | 1618.4549 | 0.0999     | 0.0001 | 0.3077  | -25.7692  | 0.0280    | -0.0017 | 0.6863    | -0.0018 | 0.6863     | 0.4611  | 0.9820    | 0.4836  | 0.9830     | 0.6466 | 0.9830      |
| Arabian Sea (15) v. Thailand (5)                  | 1441.9783 | 0.4725     | 0.0001 | 0.5614  | -35.0742  | 0.1528    | -0.0019 | 0.7233    | -0.0020 | 0.7233     | 0.5595  | 0.8841    | 0.5805  | 0.8851     | 0.7310 | 0.8841      |
| Caribbean Sea (2) v. Gulf of Mexico (37)          | 1323.0750 | 0.5604     | 0.0001 | 0.4815  | 11.3906   | 1.0000    | -0.0020 | 0.5714    | -0.0022 | 1.0000     | -9.8053 | 1.0000    | -8.6016 | 1.0000     | 2.0904 | 1.0000      |
| Mozambique (11) v. Thailand (5)                   | 1270.4968 | 0.5355     | 0.0001 | 0.5844  | -134.4816 | 0.2073    | -0.0027 | 0.7239    | -0.0029 | 0.7159     | 0.8477  | 0.9925    | 0.8568  | 0.9925     | 0.9225 | 0.9925      |
| Caribbean Sea (2) v. Western North Atlantic (8)   | 794.9991  | 0.6404     | 0.0001 | 0.4745  | NA        | NA        | -0.0077 | 1.0000    | -0.0083 | 1.0000     | NA      | NA        | NA      | NA         | NA     | NA          |
| Australia (444) v. Indonesia (4)                  | 4132.4024 | 0.0240     | 0.0001 | 0.0110  | NA        | NA        | NA      | NA        | NA      | NA         | NA      | NA        | NA      | NA         | NA     | NA          |
| Fiji (25) v. Indonesia (4)                        | 2319.4034 | 0.0010     | 0.0002 | 0.0020  | NA        | NA        | NA      | NA        | NA      | NA         | NA      | NA        | NA      | NA         | NA     | NA          |
| Indonesia (4) v. Japan (44)                       | 2889.8901 | 0.0010     | 0.0003 | 0.0020  | NA        | NA        | NA      | NA        | NA      | NA         | NA      | NA        | NA      | NA         | NA     | NA          |
| Indonesia (4) v. South Africa (22)                | 1619.1846 | 0.0679     | 0.0001 | 0.0390  | NA        | NA        | NA      | NA        | NA      | NA         | NA      | NA        | NA      | NA         | NA     | NA          |

### 8.7.3 Fst per Region

```
strata <- BS.dartcap.gt@schemes$Region
strata[strata %in% c("E-IO", "W-PAC")] <- "E-IO/W-PAC"
names(strata) <- BS.dartcap.gt@schemes$INDIVIDUALS
strataG::setStrata(BS.dartcap.gt) <- strata

Fst.gt <- strataG::popStructTest(
  BS.dartcap.gt,
  nrep = 1000,
  stats = "all",
  type = "pairwise",
  keep.null = FALSE,
  quietly = TRUE,
  nb.cores = parallel::detectCores() - 1,
  write.output = FALSE
)
save(Fst.gt, file = "DARtcap_ALL_FST_Regions.Rdata")
readr::write_tsv(Fst.gt$pairwise$result, path = "DARtcap_ALL_FST_Regions.txt")

load("DARtcap_ALL_FST_Regions.Rdata")
kableExtra::kbl(Fst.gt$pairwise$result[order(Fst.gt$pairwise$result$Fst,
                                             decreasing = TRUE),
                                             -c(1:4)], digits = 4,
  caption = "Pairwise Fst for 3443 DARtcap loci between the all regions",
  longtable = TRUE, booktabs = TRUE) %>%
  kableExtra::kable_styling(full_width = FALSE, font_size = 5,
    latex_options = c("repeat_header", "hold_position")) %>%
  kableExtra::landscape()

pop.levels1 <- c("E-PAC", "W-ATL", "E-ATL", "W-IO", "N-IO", "E-IO/W-PAC",
  "Japan", "Fiji")

m2 <- Fst.gt$pairwise$result[order(match(Fst.gt$pairwise$result$strata.1,
                                         pop.levels1), c(1, 2, 11))]
Gdf <- igraph::graph.data.frame(m2, directed = FALSE)
m2.1 <- igraph::as_adjacency_matrix(Gdf, names = TRUE, sparse = FALSE,
  attr = "Fst", type = 'lower')

m2 <- Fst.gt$pairwise$result[order(match(Fst.gt$pairwise$result$strata.1,
                                         pop.levels1), c(1, 2, 12))]
Gdf <- igraph::graph.data.frame(m2, directed = FALSE)
m2.2 <- igraph::as_adjacency_matrix(Gdf, names = TRUE, sparse = FALSE,
  attr = "Fst.p.val", type = 'lower')
m2$Fst.p.adj <- p.adjust(m2$Fst.p.val, "bonferroni")
Gdf <- igraph::graph.data.frame(m2, directed = FALSE)
m2.3 <- igraph::as_adjacency_matrix(Gdf, names = TRUE, sparse = FALSE,
  attr = "Fst.p.adj", type = 'lower')

write.csv(m2.1, file = "DARtcap_ALL_FST_Regions.csv")
write.csv(m2.2, file = "DARtcap_ALL_FST_Pval_Regions.csv")
write.csv(m2.3, file = "DARtcap_ALL_FST_Pval_bonferroni_Regions.csv")
```



Table 21: Pairwise Fst for 3443 DARTcp loci between the all regions

|                                | Chi2       | Chi2.p.val | D      | D.p.val | Fis      | Fis.p.val | Fst    | Fst.p.val | F'st   | F'st.p.val | Gst     | Gst.p.val | G'st    | G'st.p.val | G''st  | G''st.p.val |
|--------------------------------|------------|------------|--------|---------|----------|-----------|--------|-----------|--------|------------|---------|-----------|---------|------------|--------|-------------|
| E-ATL (1) v. E-PAC (16)        | 11158.858  | 0.0559     | 0.0114 | 0.0559  | NA       | NA        | 0.7013 | 1.000     | 0.7555 | 1.000      | NA      | NA        | NA      | NA         | NA     | NA          |
| Japan (44) v. W-ATL (97)       | 120117.283 | 0.0010     | 0.0211 | 0.0010  | -4.0027  | 1.0000    | 0.6667 | 0.001     | 0.7245 | 0.001      | 0.5080  | 0.0010    | 0.5686  | 0.0010     | 0.7139 | 0.0010      |
| Fiji (25) v. W-ATL (97)        | 95752.021  | 0.0010     | 0.0206 | 0.0010  | -4.6818  | 1.0000    | 0.6629 | 0.001     | 0.7235 | 0.001      | 0.5102  | 0.0010    | 0.5706  | 0.0010     | 0.7157 | 0.0010      |
| E-PAC (16) v. Japan (44)       | 48791.209  | 0.0010     | 0.0182 | 0.0010  | -10.8638 | 1.0000    | 0.6609 | 0.001     | 0.7115 | 0.001      | 0.5930  | 0.0010    | 0.6435  | 0.0010     | 0.7762 | 0.0010      |
| N-IO (32) v. W-ATL (97)        | 104843.972 | 0.0010     | 0.0200 | 0.0010  | -3.4887  | 1.0000    | 0.6595 | 0.001     | 0.7187 | 0.001      | 0.4966  | 0.0010    | 0.5574  | 0.0010     | 0.7042 | 0.0010      |
| E-PAC (16) v. Fiji (25)        | 32838.244  | 0.0010     | 0.0177 | 0.0010  | -12.8862 | 1.0000    | 0.6594 | 0.001     | 0.7427 | 0.001      | 0.6143  | 0.0010    | 0.6629  | 0.0010     | 0.7912 | 0.0010      |
| W-ATL (97) v. W-IO (97)        | 167080.101 | 0.0010     | 0.0201 | 0.0010  | -2.1320  | 1.0000    | 0.6526 | 0.001     | 0.7090 | 0.001      | 0.4891  | 0.0010    | 0.5500  | 0.0010     | 0.6978 | 0.0010      |
| E-PAC (16) v. N-IO (32)        | 39020.274  | 0.0010     | 0.0172 | 0.0010  | -9.3166  | 1.0000    | 0.6516 | 0.001     | 0.6994 | 0.001      | 0.5776  | 0.0010    | 0.6289  | 0.0010     | 0.7648 | 0.0010      |
| E-IO/W-PAC (457) v. W-ATL (97) | 457028.313 | 0.0010     | 0.0200 | 0.0010  | -0.2794  | 1.0000    | 0.6413 | 0.001     | 0.6887 | 0.001      | 0.4836  | 0.0010    | 0.5448  | 0.0010     | 0.6932 | 0.0010      |
| E-PAC (16) v. W-IO (97)        | 83951.675  | 0.0010     | 0.0172 | 0.0010  | -5.7967  | 1.0000    | 0.6372 | 0.001     | 0.7023 | 0.001      | 0.5446  | 0.0010    | 0.5979  | 0.0010     | 0.7397 | 0.0010      |
| E-ATL (1) v. W-ATL (97)        | 27769.816  | 0.0090     | 0.0129 | 0.0090  | 4.1821   | 1.0000    | 0.6331 | 1.000     | 0.6949 | 1.000      | 22.5515 | 1.0000    | 16.9504 | 1.0000     | 1.6773 | 1.0000      |
| E-IO/W-PAC (457) v. E-PAC (16) | 306720.921 | 0.0010     | 0.0172 | 0.0010  | -1.0829  | 1.0000    | 0.6265 | 0.001     | 0.6694 | 0.001      | 0.5104  | 0.0010    | 0.5657  | 0.0010     | 0.7124 | 0.0010      |
| E-PAC (16) v. W-ATL (97)       | 21245.739  | 0.0010     | 0.0025 | 0.0010  | -8.8181  | 1.0000    | 0.3490 | 0.001     | 0.3798 | 0.001      | 0.3044  | 0.0010    | 0.3305  | 0.0010     | 0.4868 | 0.0010      |
| E-ATL (1) v. Japan (44)        | 6184.421   | 0.0210     | 0.0009 | 0.0210  | 3.6975   | 1.0000    | 0.2067 | 1.000     | 0.2253 | 1.000      | -2.0230 | 1.0000    | -1.2649 | 1.0000     | 3.2141 | 1.0000      |
| E-ATL (1) v. Fiji (25)         | 3717.034   | 0.0370     | 0.0008 | 0.0719  | 3.5244   | 1.0000    | 0.1610 | 1.000     | 0.1913 | 1.000      | -1.8479 | 1.0000    | -1.0793 | 1.0000     | 3.4522 | 1.0000      |
| E-ATL (1) v. E-IO/W-PAC (457)  | 28506.972  | 0.0040     | 0.0007 | 0.0040  | -14.8084 | 1.0000    | 0.1574 | 1.000     | 0.1724 | 1.000      | 0.7535  | 1.0000    | 0.7700  | 1.0000     | 0.8688 | 1.0000      |
| E-ATL (1) v. N-IO (32)         | 4376.922   | 0.0360     | 0.0007 | 0.0360  | 3.7775   | 1.0000    | 0.1573 | 1.000     | 0.1714 | 1.000      | -2.1933 | 1.0000    | -1.4427 | 1.0000     | 3.0470 | 1.0000      |
| E-ATL (1) v. W-IO (97)         | 9473.367   | 0.0130     | 0.0007 | 0.0130  | 4.4781   | 1.0000    | 0.1552 | 1.000     | 0.1731 | 1.000      | -4.1996 | 1.0000    | -3.2707 | 1.0000     | 2.3348 | 1.0000      |
| Fiji (25) v. Japan (44)        | 5695.638   | 0.0010     | 0.0003 | 0.0010  | -8.2308  | 1.0000    | 0.0617 | 0.001     | 0.0668 | 0.001      | 0.0972  | 0.0010    | 0.1084  | 0.0010     | 0.1873 | 0.0010      |
| Fiji (25) v. W-IO (97)         | 5603.824   | 0.0010     | 0.0002 | 0.0010  | -5.2621  | 0.9990    | 0.0313 | 0.001     | 0.0346 | 0.001      | 0.0517  | 0.0010    | 0.0581  | 0.0010     | 0.1044 | 0.0010      |
| E-IO/W-PAC (457) v. Fiji (25)  | 9554.750   | 0.0010     | 0.0002 | 0.0010  | -1.4206  | 0.0460    | 0.0310 | 0.001     | 0.0334 | 0.001      | 0.0243  | 0.0010    | 0.0275  | 0.0010     | 0.0505 | 0.0010      |
| Japan (44) v. N-IO (32)        | 4233.906   | 0.0010     | 0.0002 | 0.0010  | -7.4254  | 1.0000    | 0.0307 | 0.001     | 0.0331 | 0.001      | 0.0646  | 0.0010    | 0.0724  | 0.0010     | 0.1286 | 0.0010      |
| Fiji (25) v. N-IO (32)         | 3818.756   | 0.0010     | 0.0002 | 0.0010  | -7.3585  | 1.0000    | 0.0301 | 0.001     | 0.0325 | 0.001      | 0.0821  | 0.0010    | 0.0918  | 0.0010     | 0.1607 | 0.0010      |
| Japan (44) v. W-IO (97)        | 6003.192   | 0.0010     | 0.0002 | 0.0010  | -5.2873  | 1.0000    | 0.0295 | 0.001     | 0.0324 | 0.001      | 0.0373  | 0.0010    | 0.0420  | 0.0010     | 0.0764 | 0.0010      |
| E-IO/W-PAC (457) v. Japan (44) | 9393.609   | 0.0010     | 0.0002 | 0.0010  | -1.6860  | 1.0000    | 0.0287 | 0.001     | 0.0308 | 0.001      | 0.0204  | 0.0010    | 0.0230  | 0.0010     | 0.0425 | 0.0010      |
| E-IO/W-PAC (457) v. N-IO (32)  | 4130.868   | 0.0010     | 0.0000 | 0.0100  | -1.5974  | 0.4575    | 0.0017 | 0.001     | 0.0019 | 0.001      | 0.0078  | 0.0010    | 0.0089  | 0.0010     | 0.0166 | 0.0010      |
| E-IO/W-PAC (457) v. W-IO (97)  | 3975.773   | 0.0010     | 0.0000 | 0.0010  | -1.4588  | 0.2657    | 0.0014 | 0.001     | 0.0015 | 0.001      | 0.0031  | 0.0010    | 0.0036  | 0.0010     | 0.0067 | 0.0010      |
| N-IO (32) v. W-IO (97)         | 2893.453   | 0.0010     | 0.0000 | 0.0080  | -5.0487  | 0.1868    | 0.0010 | 0.037     | 0.0011 | 0.036      | 0.0271  | 0.2897    | 0.0306  | 0.2747     | 0.0562 | 0.2817      |

## 8.8 PCA

```
pca1 <- adegenet::glPca(BS.dartcap.gl, nf = 5, parallel = TRUE,  
                        n.cores = parallel::detectCores() - 1)  
save(pca1, file = "DARtcap_ALL_PCA.Rdata")
```

```
load("DARtcap_ALL_PCA.Rdata")
```

```
BS.pca.scores <- as.data.frame(pca1$scores)  
BS.pca.scores$pop <- pop(BS.dartcap.gl)  
cols <- adegenet::funky(nPop(BS.dartcap.gl))
```

```
p <-  
ggplot2::ggplot(BS.pca.scores, ggplot2::aes(x = PC1, y = PC2, colour = pop)) +  
ggplot2::geom_point(size = 2) + ggplot2::scale_color_manual(values = cols) +  
ggplot2::geom_hline(yintercept = 0) + ggplot2::geom_vline(xintercept = 0) +  
ggplot2::theme_minimal() +  
ggplot2::theme(  
  axis.text = ggplot2::element_text(size = 5),  
  axis.title.x = ggplot2::element_text(size = 10),  
  axis.title.y = ggplot2::element_text(size = 10),  
  legend.text = ggplot2::element_text(size = 7)  
)  
p
```

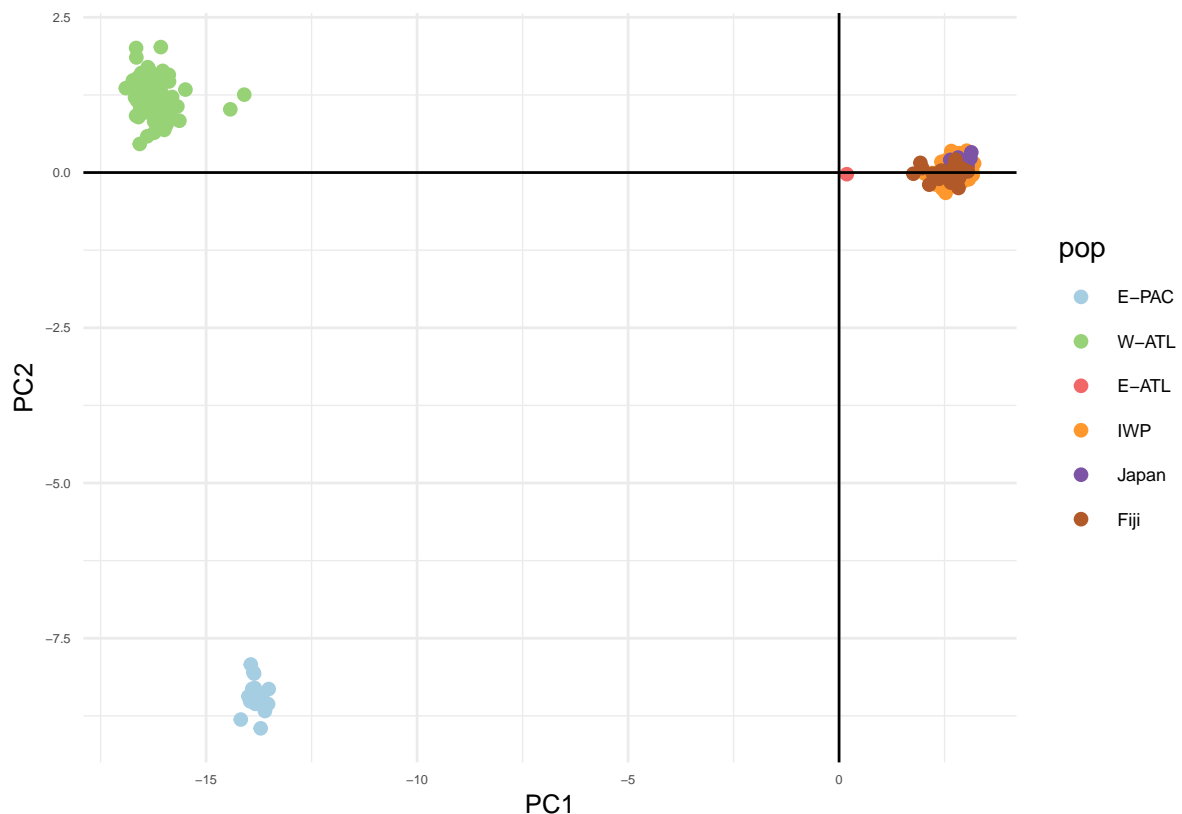

```
ggplot2::ggsave(p, filename = "DARtcap_ALL_PCA1.png", width = 30,  
                height = 15, units = "cm")
```

```
p <-  
ggplot2::ggplot(BS.pca.scores, ggplot2::aes(x = PC1, y = PC3, colour = pop)) +  
ggplot2::geom_point(size = 2) + ggplot2::scale_color_manual(values = cols) +
```

```

ggplot2::geom_hline(yintercept = 0) + ggplot2::geom_vline(xintercept = 0) +
ggplot2::theme_minimal() +
ggplot2::theme(
  axis.text = ggplot2::element_text(size = 5),
  axis.title.x = ggplot2::element_text(size = 10),
  axis.title.y = ggplot2::element_text(size = 10),
  legend.text = ggplot2::element_text(size = 7)
)

```

p

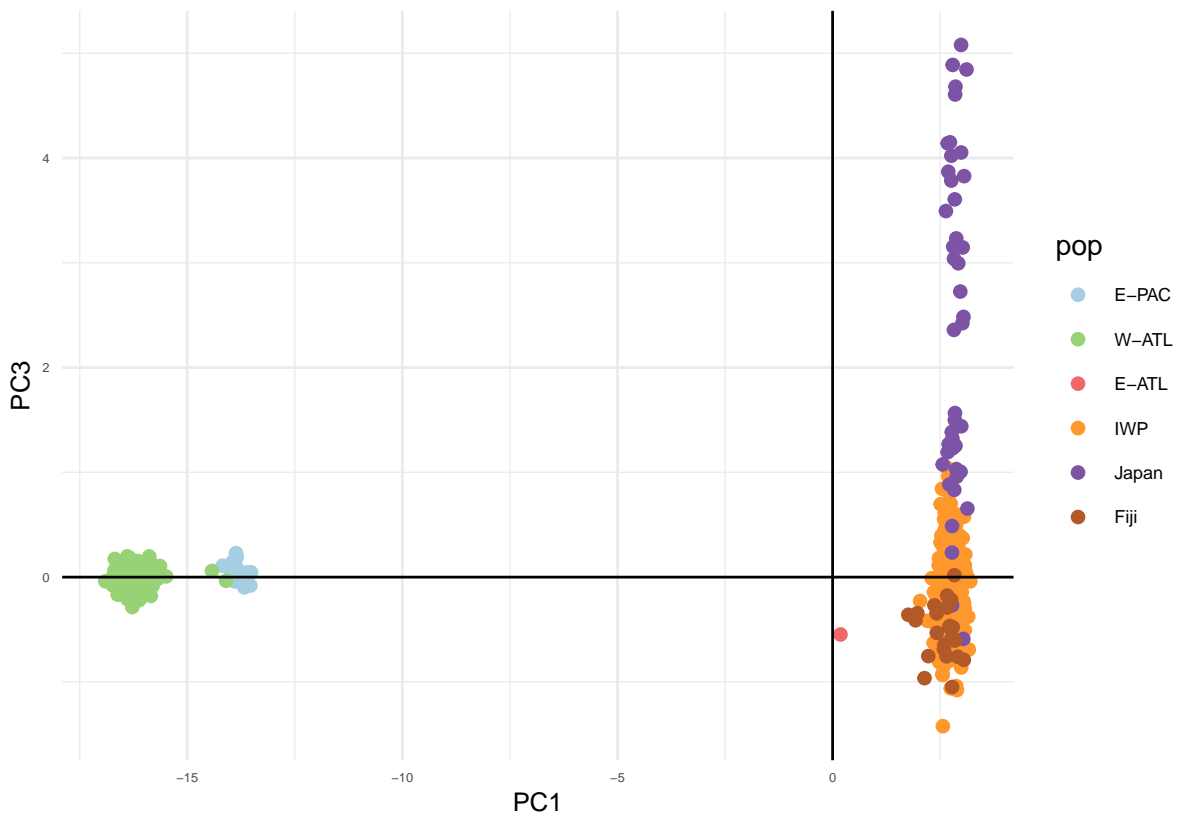

```

ggplot2::ggsave(p, filename = "DArTcap_ALL_PCA2.png", width = 30,
  height = 15, units = "cm")

```

```

p <-
ggplot2::ggplot(BS.pca.scores, ggplot2::aes(x = PC2, y = PC3, colour = pop)) +
ggplot2::geom_point(size = 2) + ggplot2::scale_color_manual(values = cols) +
ggplot2::geom_hline(yintercept = 0) + ggplot2::geom_vline(xintercept = 0) +
ggplot2::theme_minimal() +
ggplot2::theme(
  axis.text = ggplot2::element_text(size = 5),
  axis.title.x = ggplot2::element_text(size = 10),
  axis.title.y = ggplot2::element_text(size = 10),
  legend.text = ggplot2::element_text(size = 7)
)

```

p

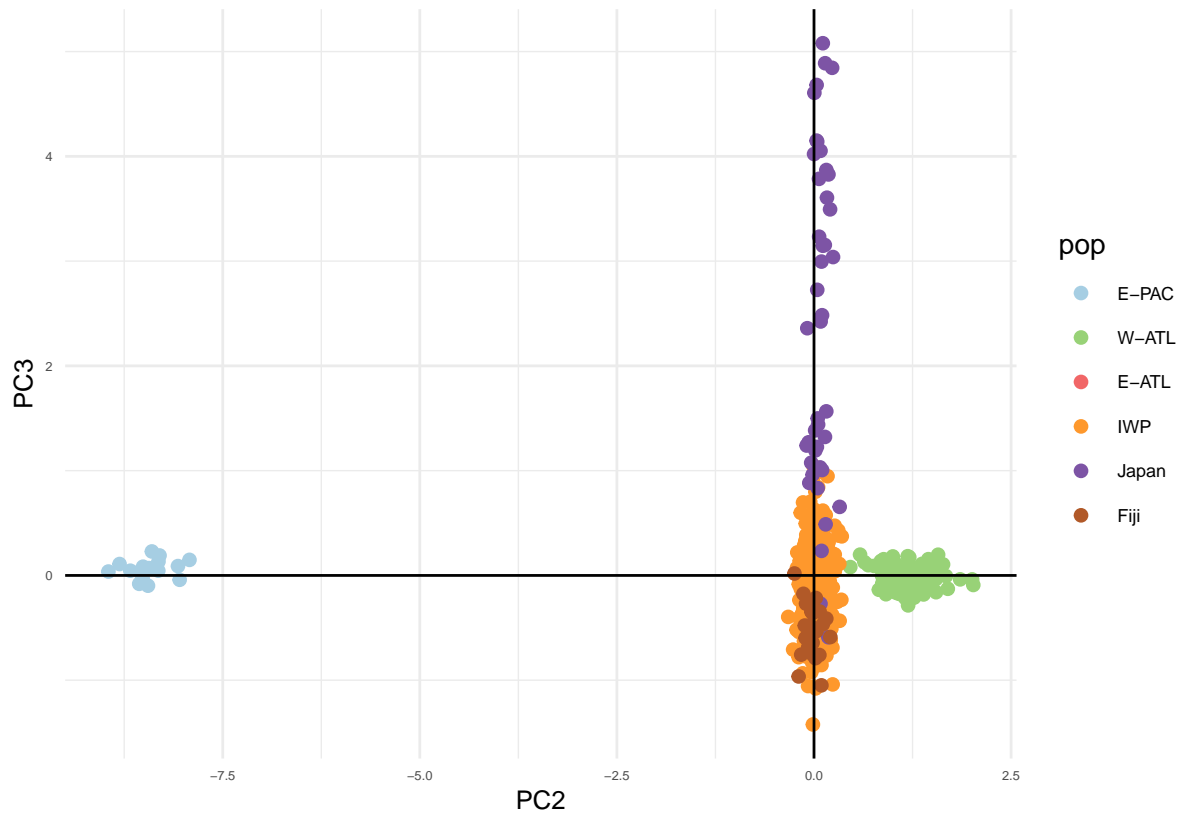

```
ggplot2::ggsave(p, filename = "DArTcap_ALL_PCA3.png", width = 30,
  height = 15, units = "cm")
```

```
p <-
ggplot2::ggplot(BS.pca.scores, ggplot2::aes(x = PC3, y = PC4, colour = pop)) +
ggplot2::geom_point(size = 2) + ggplot2::scale_color_manual(values = cols) +
ggplot2::geom_hline(yintercept = 0) + ggplot2::geom_vline(xintercept = 0) +
ggplot2::theme_minimal() +
ggplot2::theme(
  axis.text = ggplot2::element_text(size = 5),
  axis.title.x = ggplot2::element_text(size = 10),
  axis.title.y = ggplot2::element_text(size = 10),
  legend.text = ggplot2::element_text(size = 7)
)
p
```

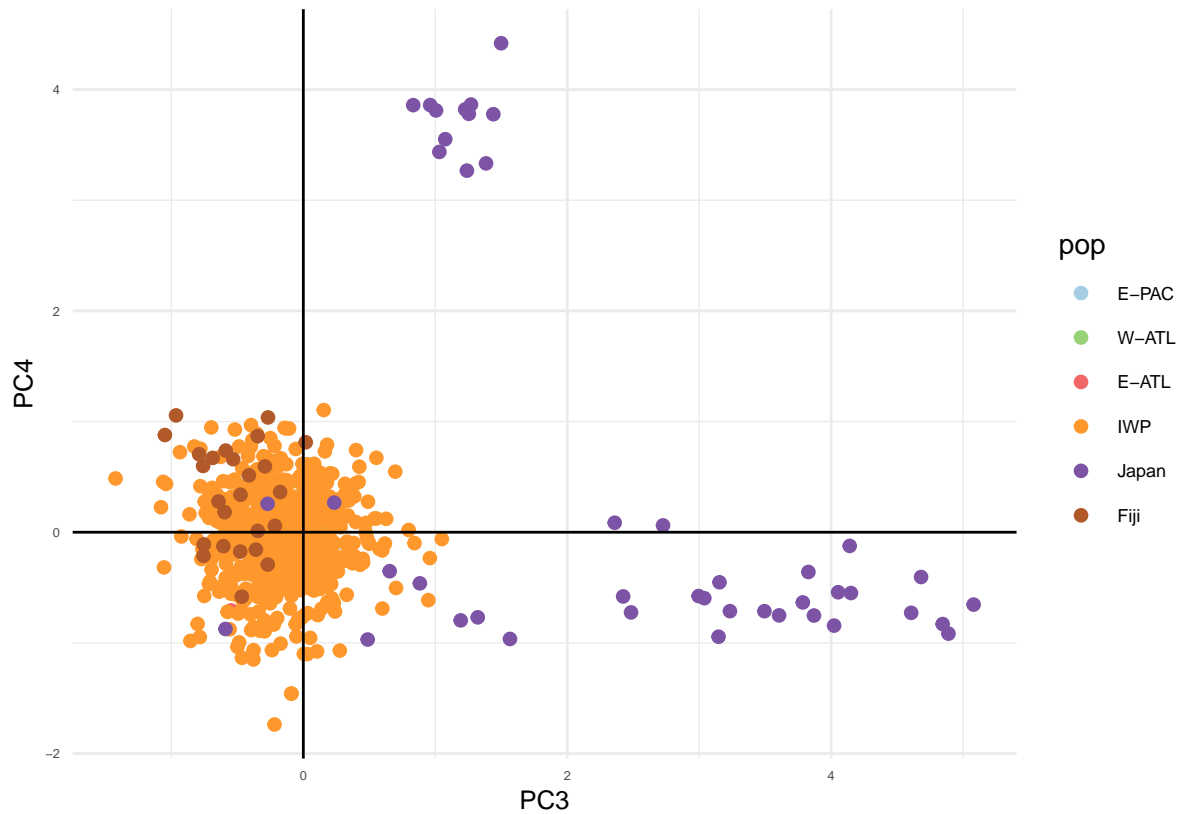

```
ggplot2::ggsave(p, filename = "DArTcap_ALL_PCA4.png", width = 30,
                height = 15, units = "cm")

p <-
ggplot2::ggplot(BS.pca.scores, ggplot2::aes(x = PC3, y = PC5, colour = pop)) +
ggplot2::geom_point(size = 2) + ggplot2::scale_color_manual(values = cols) +
ggplot2::geom_hline(yintercept = 0) + ggplot2::geom_vline(xintercept = 0) +
ggplot2::theme_minimal() +
ggplot2::theme(
  axis.text = ggplot2::element_text(size = 5),
  axis.title.x = ggplot2::element_text(size = 10),
  axis.title.y = ggplot2::element_text(size = 10),
  legend.text = ggplot2::element_text(size = 7)
)
p
```

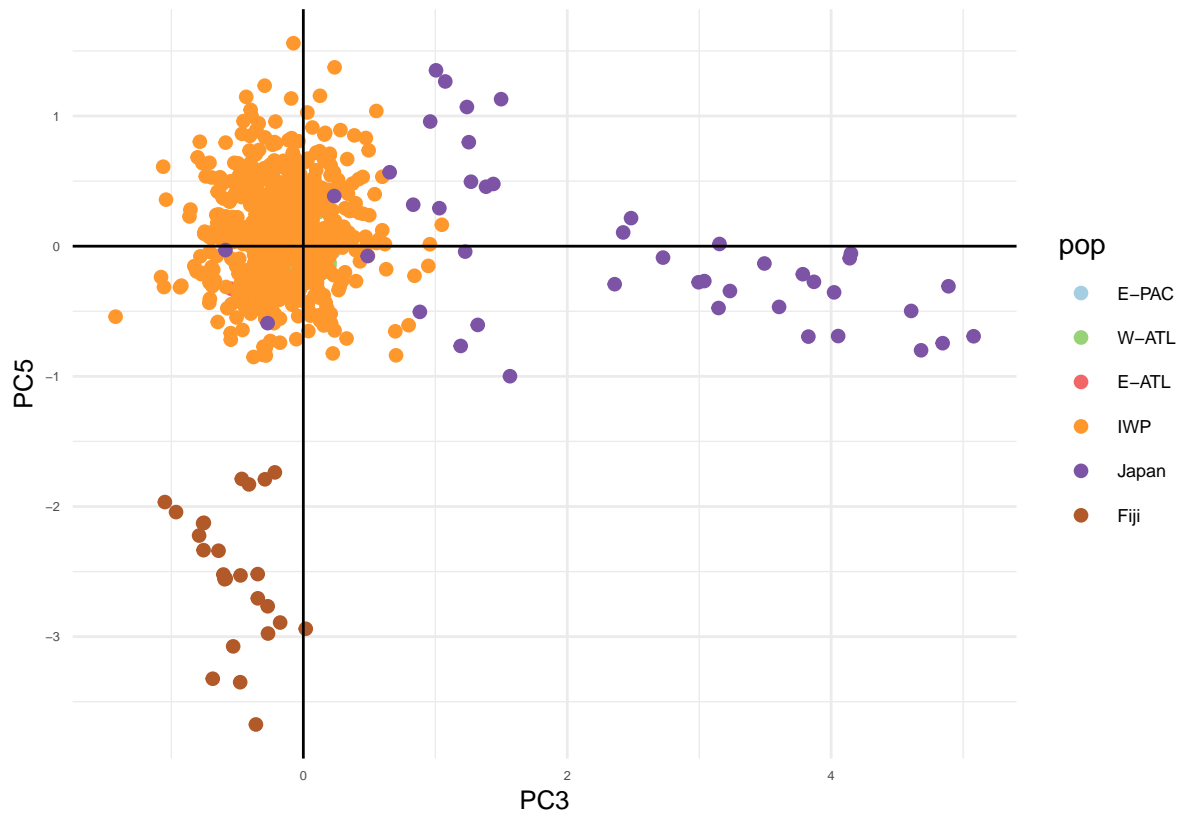

```
ggplot2::ggsave(p, filename = "DArTcap_ALL_PCA5.png", width = 30,
  height = 15, units = "cm")
```

## 8.9 DAPC

### 8.9.1 Optimal number of clusters with neutral markers

```
set.seed(124)
grp <-
  adegenet::find.clusters(
    BS.dartcap.g1,
    max.n.clust = 18,
    n.pca = adegenet::nInd(BS.dartcap.g1) / 3,
    stat = "BIC",
    parallel = TRUE,
    n.cores = parallel::detectCores() - 1
  )
```

```
save(grp, file = "DArTcap_ALL_grp_.Rdata")
```

```
load("DArTcap_ALL_grp_.Rdata")
```

```
y <- as.numeric(grp$Kstat)
x <- 1:18
data <- data.frame(x,y,stringsAsFactors = F)
plot <- ggplot2::ggplot(data, ggplot2::aes(x,y)) +
  ggplot2::geom_point(size = 5, shape = 1, color = "blue") +
  ggplot2::geom_line(size = 1,color = "blue") +
  ggplot2::scale_x_continuous(name = waiver(),
    breaks = seq(from = 0,
      to = nrow(BS.dartcap.g1) - 1, by = 1)) +
```

```

ggplot2::labs(subtitle = "",
              y = "Bayesian Information Criterion",
              x = "Number of clusters",
              title = "",
              caption = "") +
ggplot2::theme_classic() +
ggplot2::theme(
  axis.text = ggplot2::element_text(size = 5),
  axis.title.x = ggplot2::element_text(size = 20,vjust = 0, hjust = 0.5),
  axis.title.y = ggplot2::element_text(size = 20,vjust = 2, hjust = 0.5))
print(plot)

```

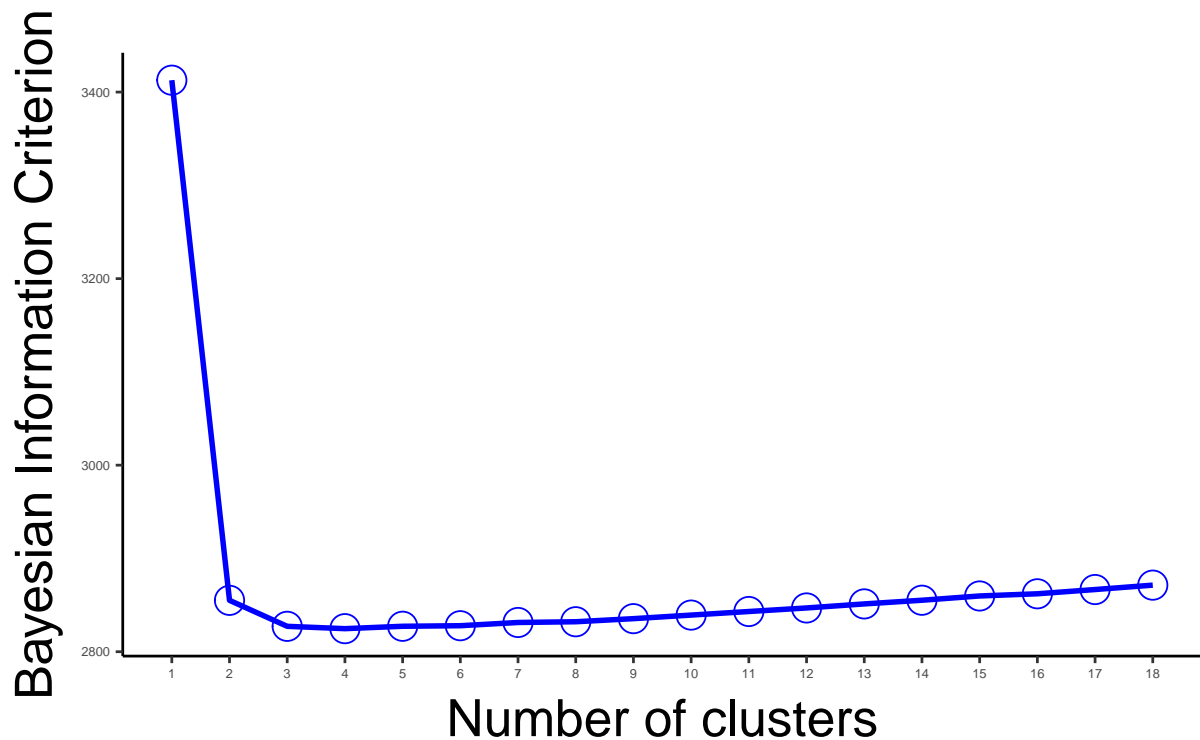

```

ggplot2::ggsave(plot, filename = "DARTcap_ALL_grp.png", width = 30,
                height = 15,units = "cm")

```

### 8.9.2 Cross-validation to identify the optimal number of PCs

Uses a training - holdout set of individuals to check how reliable individuals can be assigned.

```

set.seed(124)
x <- BS.dartcap.gl
x <- x[x$pop != "Sierra Leone",] #only1 sample

xval <-
  adegenet::xvalDapc(
    tab(x, NA.method = "mean"),
    adegenet::pop(x),
    n.pca = seq(1, adegenet::nInd(x), by = 50),
    training.set = 0.9,
    result = "groupMean",
    center = TRUE,
    scale = FALSE,

```

```

n.rep = 1000,
parallel = "multicore",
ncpus = 1,
xval.plot = TRUE
)
print(xval[2:6])
PC <- as.numeric(xval$`Number of PCs Achieving Lowest MSE`)

#refine the analysis
set.seed(124)
png(file="DArTcap_ALL_xval.png")
xval <-
  adegenet::xvalDapc(
    tab(x, NA.method = "mean"),
    adegenet::pop(x),
    n.pca = (PC - 15):(PC + 15),
    n.rep = 1000,
    parallel = "multicore",
    ncpus = 1,
    xval.plot = TRUE
  )
dev.off()
save(xval, file = "DArTcap_ALL_xval.rdata")

load("DArTcap_ALL_xval.rdata")
print(xval[2:6])
PC <- as.numeric(xval$`Number of PCs Achieving Lowest MSE`)

## $`Median and Confidence Interval for Random Chance`
##      2.5%      50%      97.5%
## 0.02065971 0.03214135 0.04492563
##
## $`Mean Successful Assignment by Number of PCs of PCA`
##      186      187      188      189      190      191      192      193
## 0.2470927 0.2462834 0.2473624 0.2470312 0.2477719 0.2475748 0.2482662 0.2481249
##      194      195      196      197      198      199      200      201
## 0.2495385 0.2485589 0.2488955 0.2482662 0.2479600 0.2490014 0.2492077 0.2488088
##      202      203      204      205      206      207      208      209
## 0.2495266 0.2486349 0.2480373 0.2491746 0.2475283 0.2507537 0.2510989 0.2529229
##      210      211      212      213      214      215      216
## 0.2517774 0.2515806 0.2515262 0.2518021 0.2508993 0.2504337 0.2498401
##
## $`Number of PCs Achieving Highest Mean Success`
## [1] "209"
##
## $`Root Mean Squared Error by Number of PCs of PCA`
##      186      187      188      189      190      191      192      193
## 0.7530993 0.7539175 0.7528239 0.7531685 0.7524294 0.7526268 0.7519474 0.7520711
##      194      195      196      197      198      199      200      201
## 0.7506672 0.7516384 0.7513023 0.7519209 0.7522335 0.7512127 0.7509966 0.7513961
##      202      203      204      205      206      207      208      209
## 0.7506742 0.7515642 0.7521607 0.7510212 0.7526754 0.7494574 0.7491003 0.7472907
##      210      211      212      213      214      215      216
## 0.7484201 0.7486261 0.7486684 0.7483942 0.7493148 0.7497796 0.7503830
##
## $`Number of PCs Achieving Lowest MSE`
## [1] "209"

```



```

dapc.all.object.names <- c()
for (K in 2:10) {
  set.seed(124)
  grp <- adegenet::find.clusters(BS.dartcap.gl, n.clust = K, n.pca = PC)
  set.seed(124)
  dapc.all.neutral <- adegenet::dapc(BS.dartcap.gl, grp$grp, n.da = K - 1,
    n.pca = PC)
  assign(paste0("dapc.all.", K), value = dapc.all.neutral)
  dapc.all.object.names <- c(dapc.all.object.names,
    paste0("dapc.all.", K))
}
save(list = dapc.all.object.names, dapc.all.object.names,
  file = "DARtcap_ALL_DAPC.Rdata")

```

### 8.9.3 DAPC barplot

Group individuals according to DAPC posterior membership.

```

load("DARtcap_ALL_DAPC.Rdata")
for (K in 2:10) {
  colour <- colours.prior[1:K]
  dapc <- get(dapc.all.object.names[K - 1])
  post <- as.matrix(dapc$posterior)
  colnames(post) <- paste0("Group", 1:nlevels(dapc$grp))
  locations <- BS.dartcap.gl$pop

  plot.dapc.FDD(x = post,
    locations = locations,
    colour = colour,
    region.lwd = 1,
    plotTitle = paste0("DAPC: all Bull Sharks - subset Australia\n for K=",
      K, " & PC=", PC, sep = ""))

  dev.print(
    device = png,
    file = paste0("DARtcap_ALL_DAPC_barplot_K", K, ".png"),
    res = 300,
    width = 30,
    height = 15,
    units = "cm")
}

```

# DAPC: all Bull Sharks – subset Australia for K=2 & PC=209

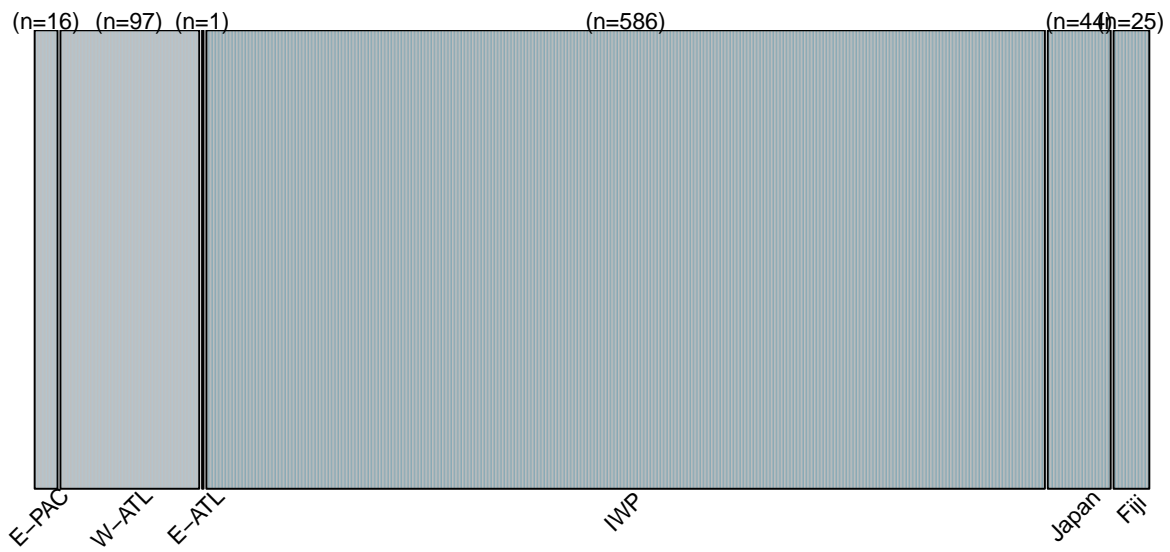

# DAPC: all Bull Sharks – subset Australia for K=3 & PC=209

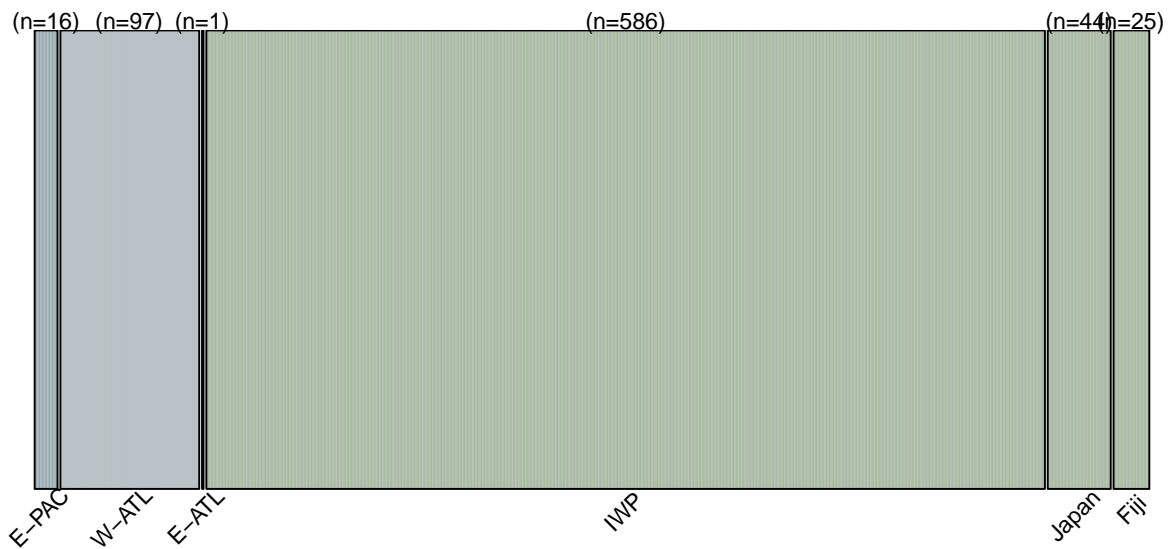

# DAPC: all Bull Sharks – subset Australia for K=4 & PC=209

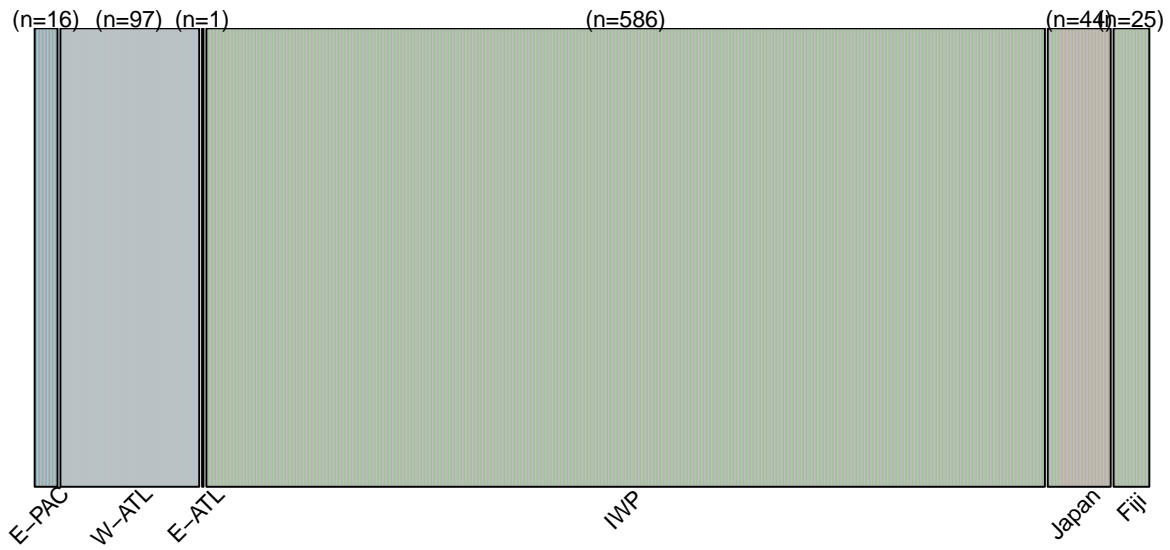

# DAPC: all Bull Sharks – subset Australia for K=5 & PC=209

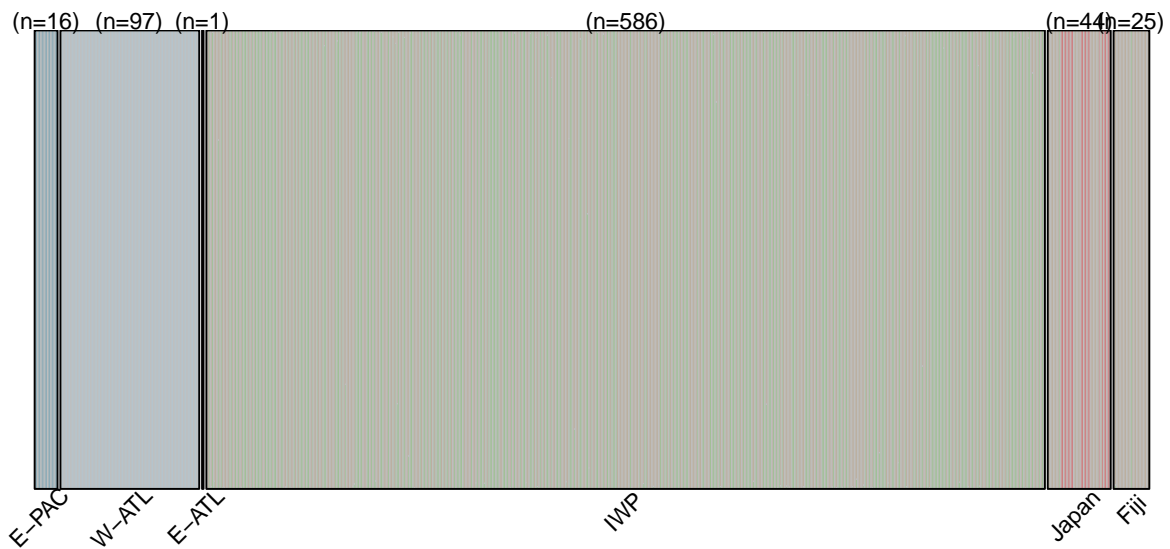

# DAPC: all Bull Sharks – subset Australia for K=6 & PC=209

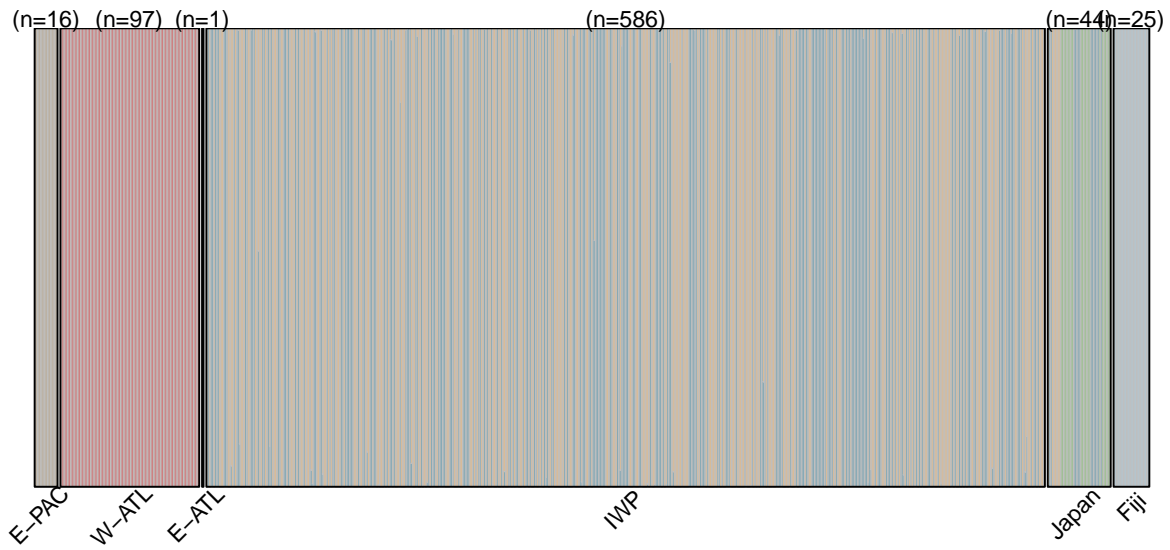

# DAPC: all Bull Sharks – subset Australia for K=7 & PC=209

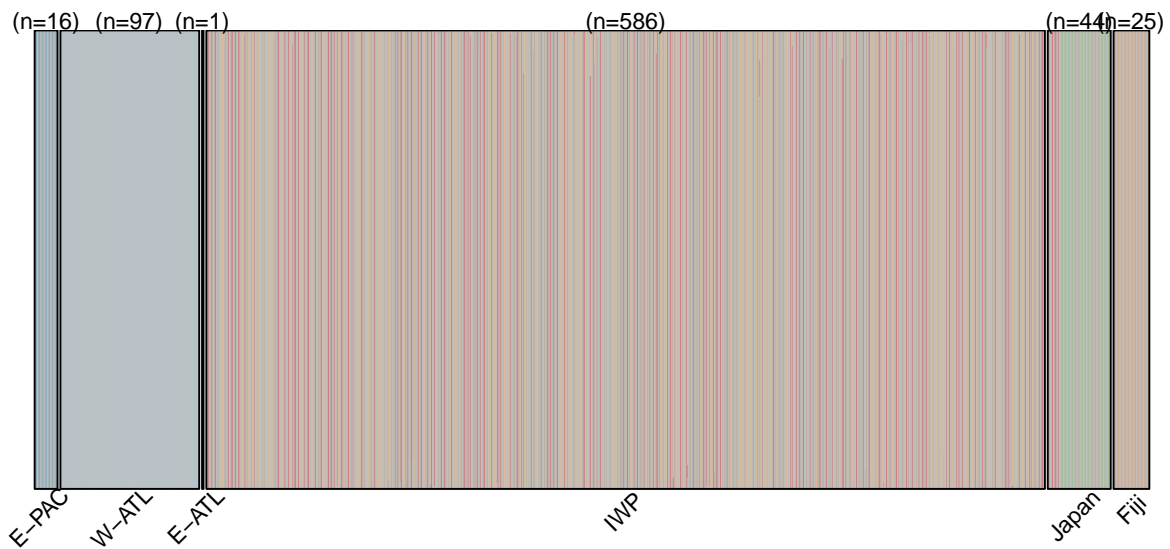

# DAPC: all Bull Sharks – subset Australia for K=8 & PC=209

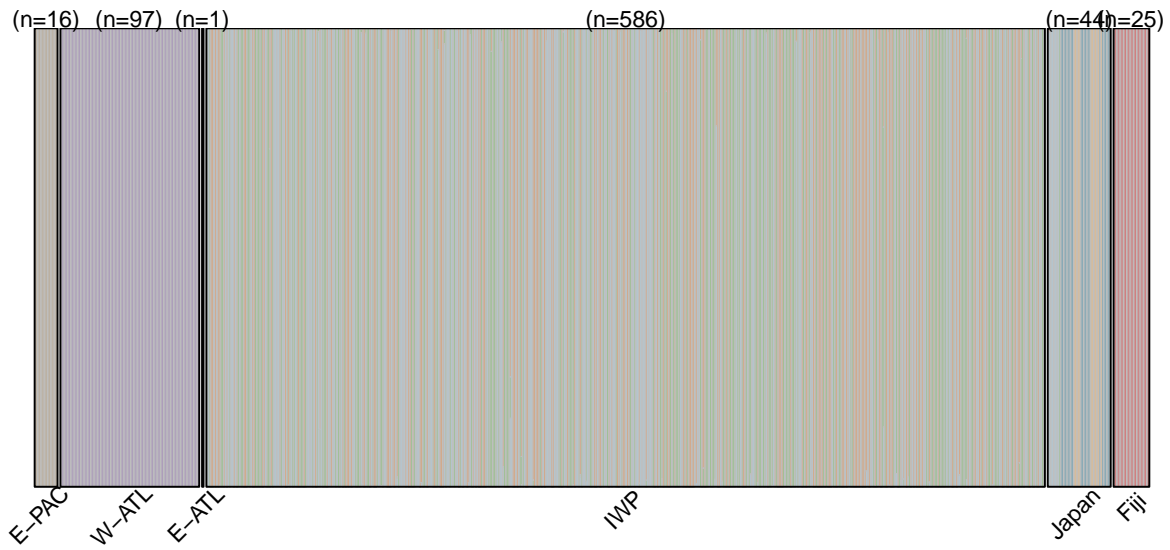

# DAPC: all Bull Sharks – subset Australia for K=9 & PC=209

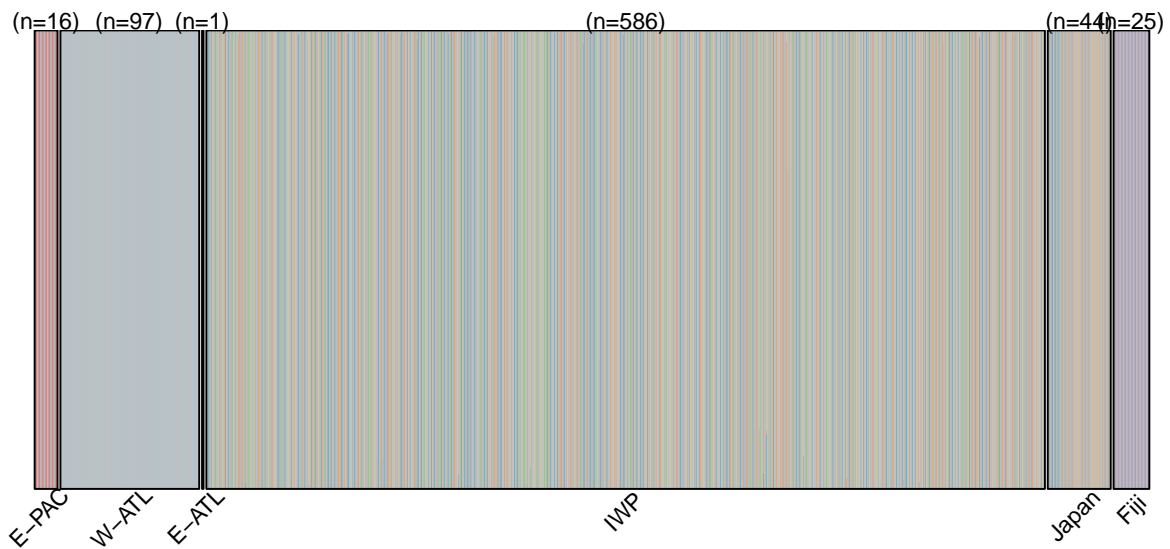

# DAPC: all Bull Sharks – subset Australia for K=10 & PC=209

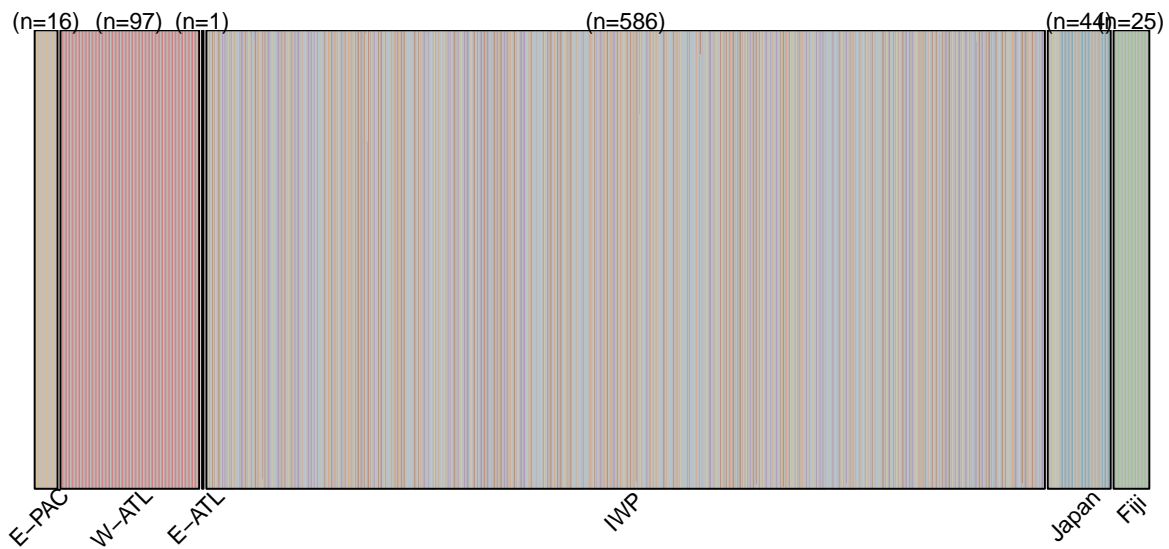

## 8.9.4 DAPC scatterplot

```
load("DArTcap_ALL_DAPC.Rdata")

for (K in 3:10) {
  dapc <- get(dapc.all.object.names[K - 1])
  if (K == 2) {
    posi.leg <- "bottomright"
  } else {posi.leg <- "bottomleft"}
  dapc.plot <- ade4::scatter(dapc, grp = pop(BS.dartcap.gl), cex = 2, legend = TRUE,
                            col = colours.32, clabel = FALSE, posi.leg = posi.leg,
                            scree.pca = FALSE, posi.pca = "topleft", cleg = 0.5,
                            xax = 1, yax = 2, inset.solid = 0.3)

  dev.print(
    device = png,
    file = paste0("DArTcap_ALL_DAPC_scatterplot_K", K, ".png"),
    width = 30,
    height = 15,
    units = "cm",
    res = 300
  )
}
```

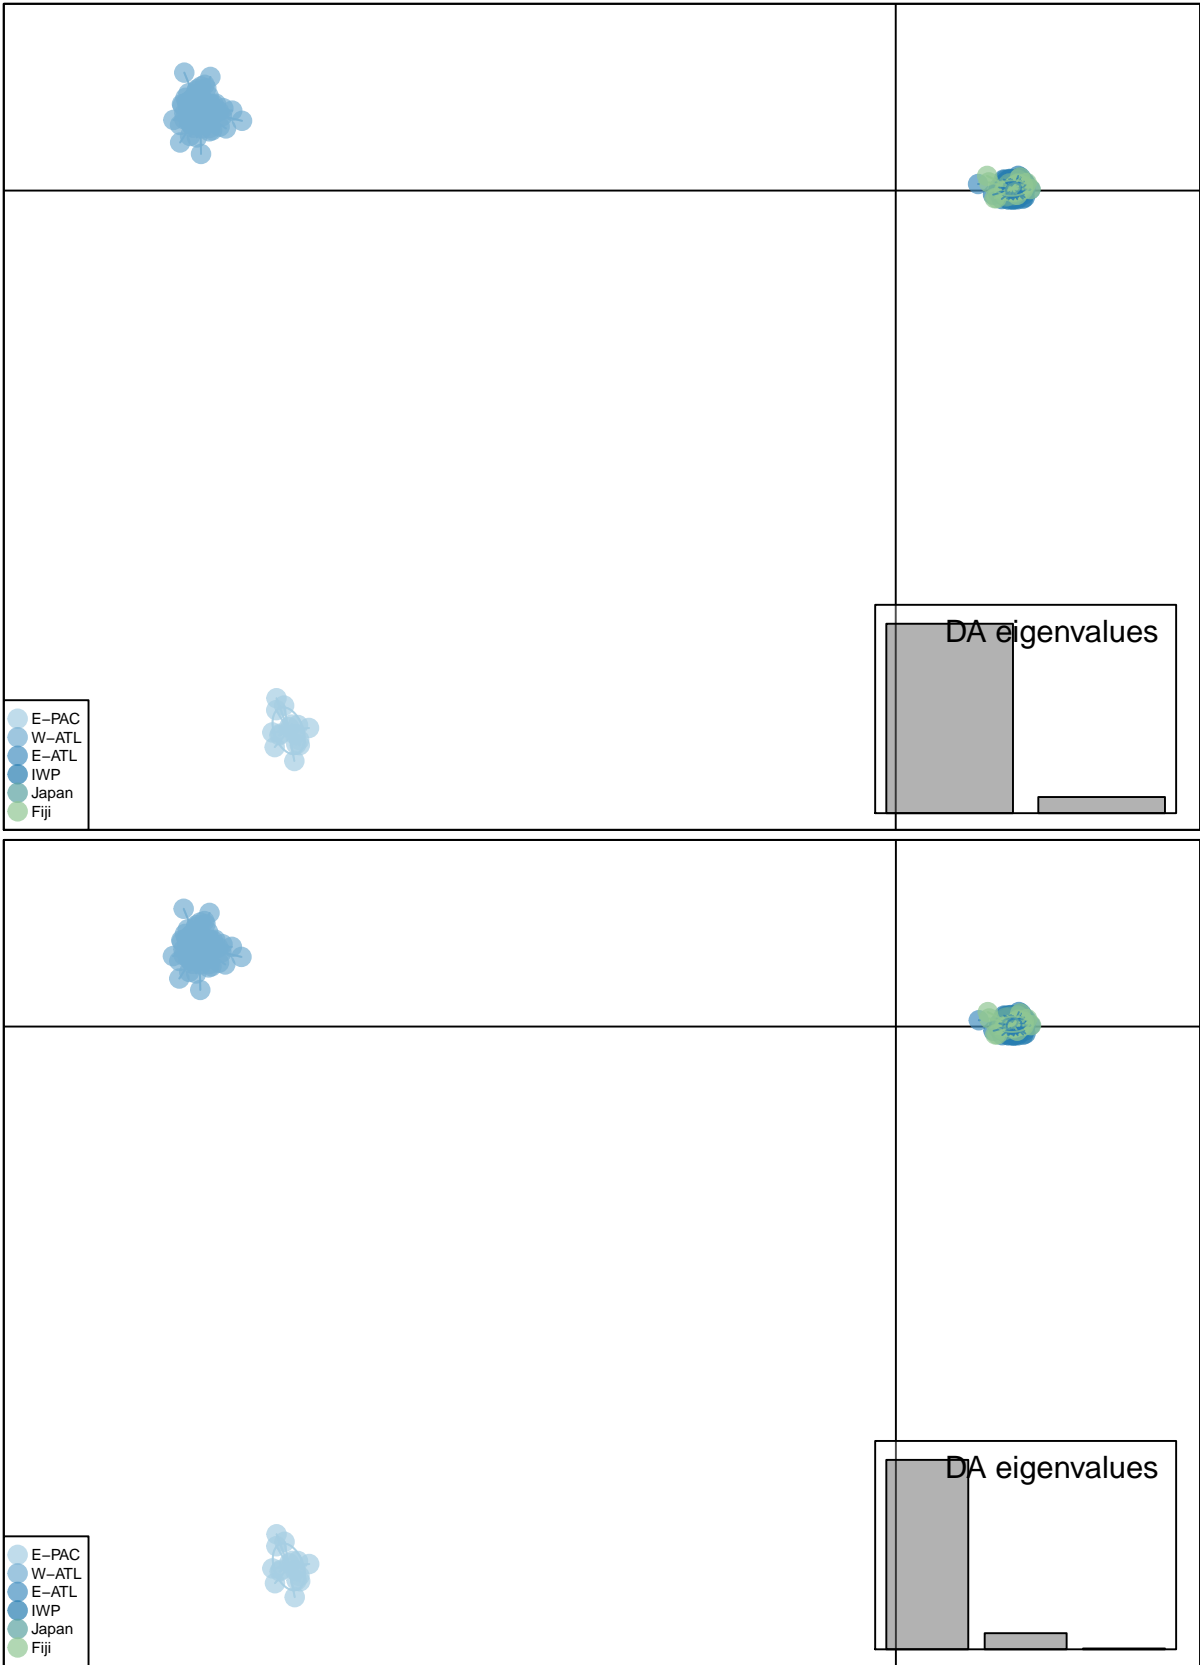

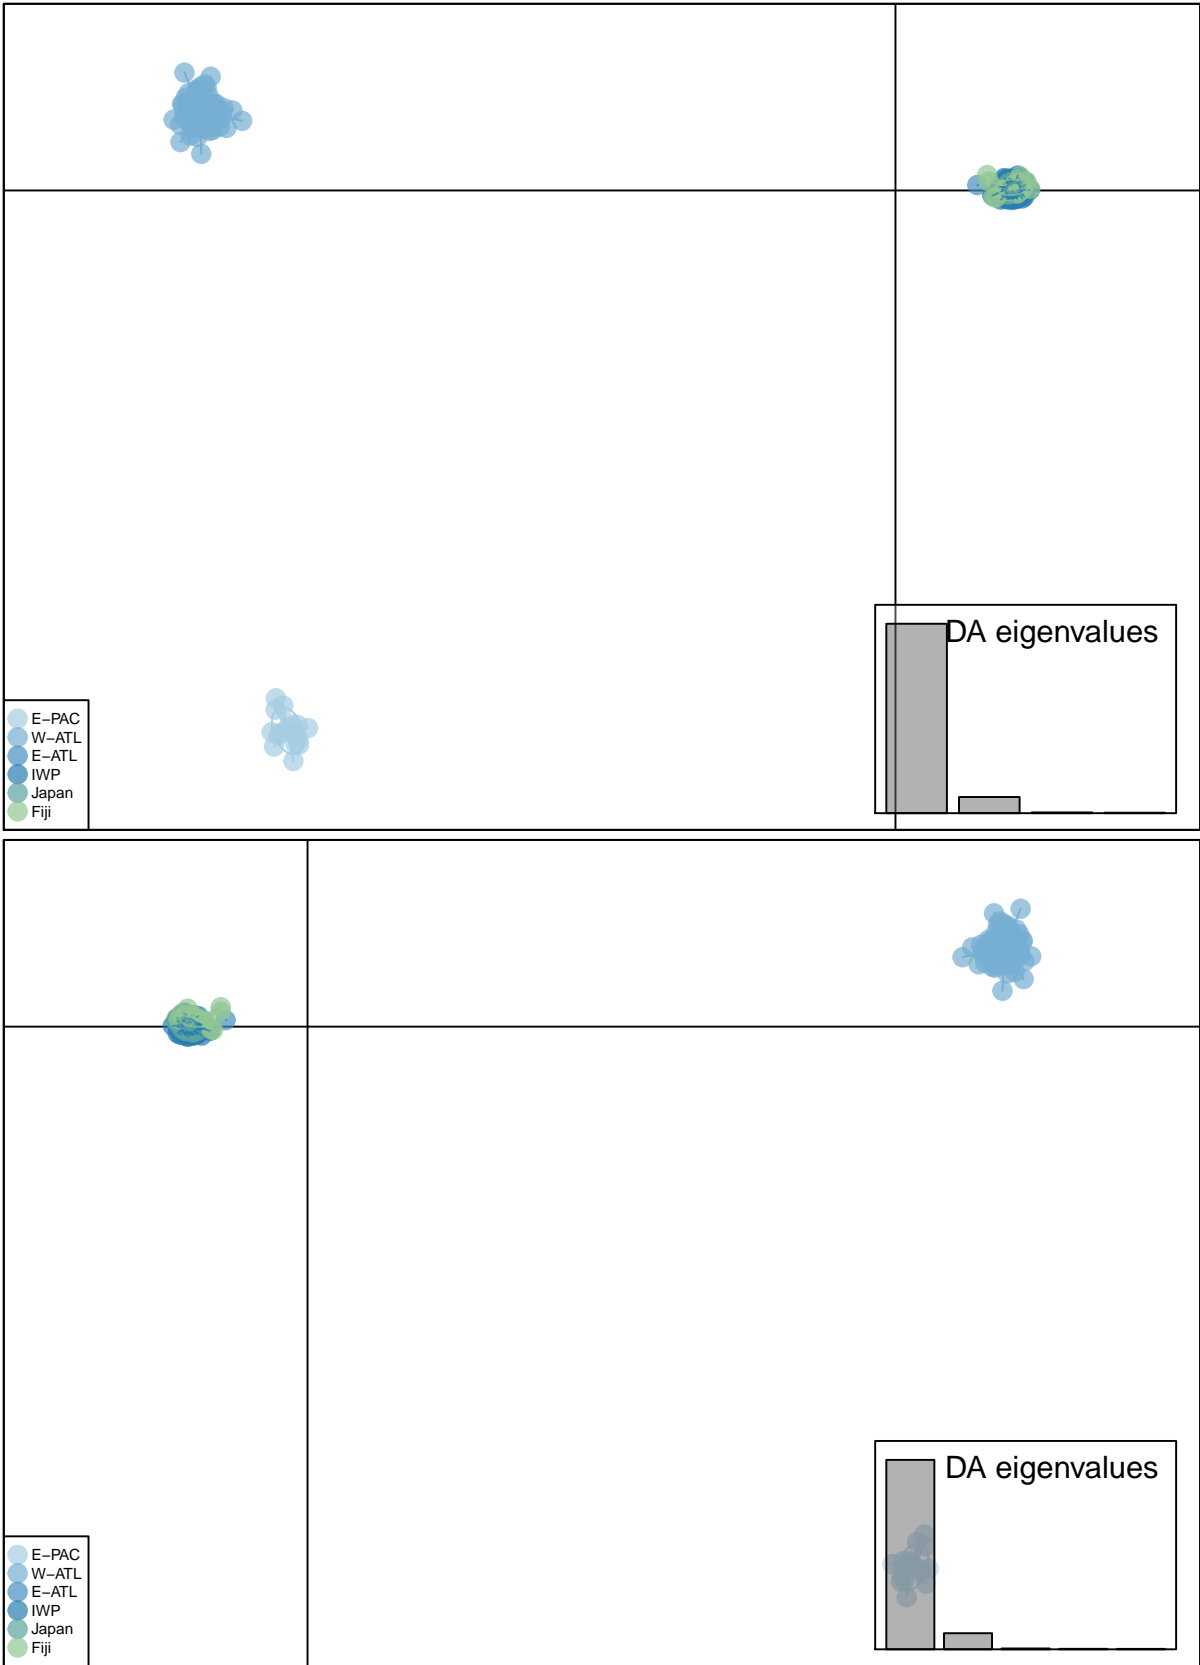



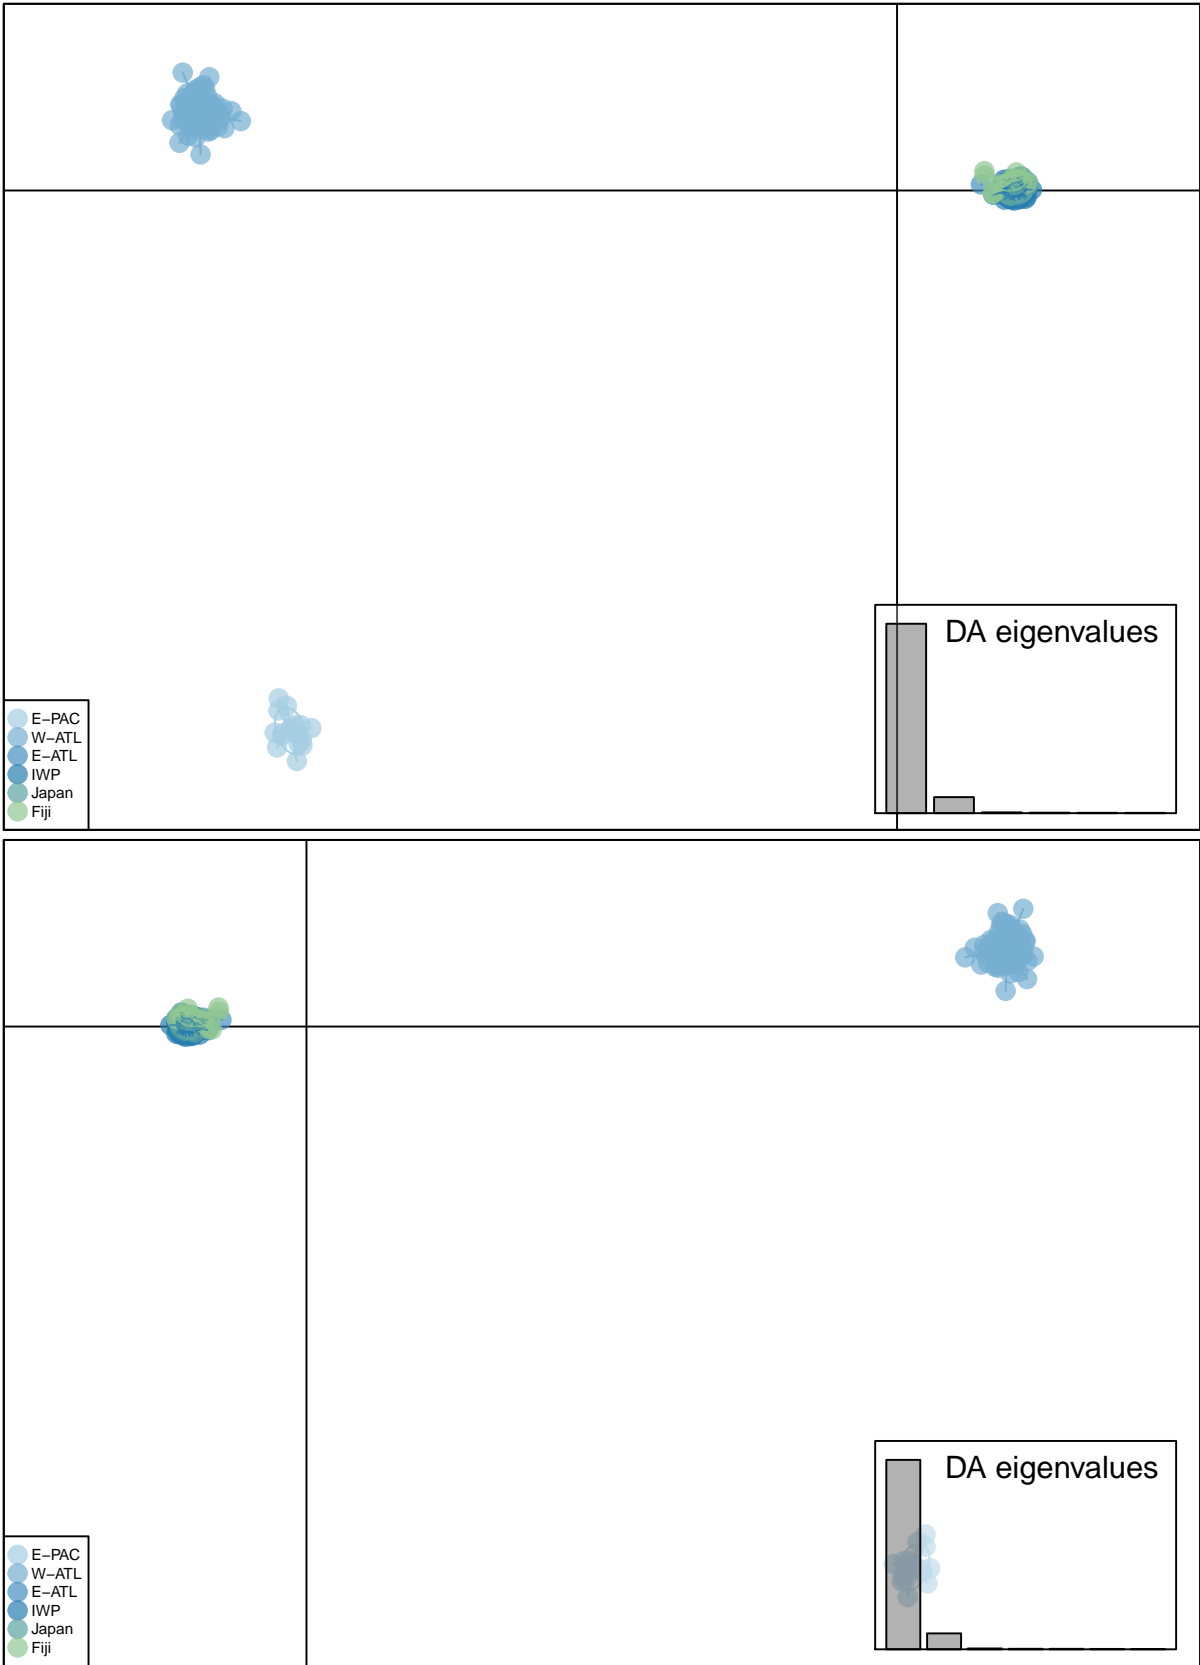

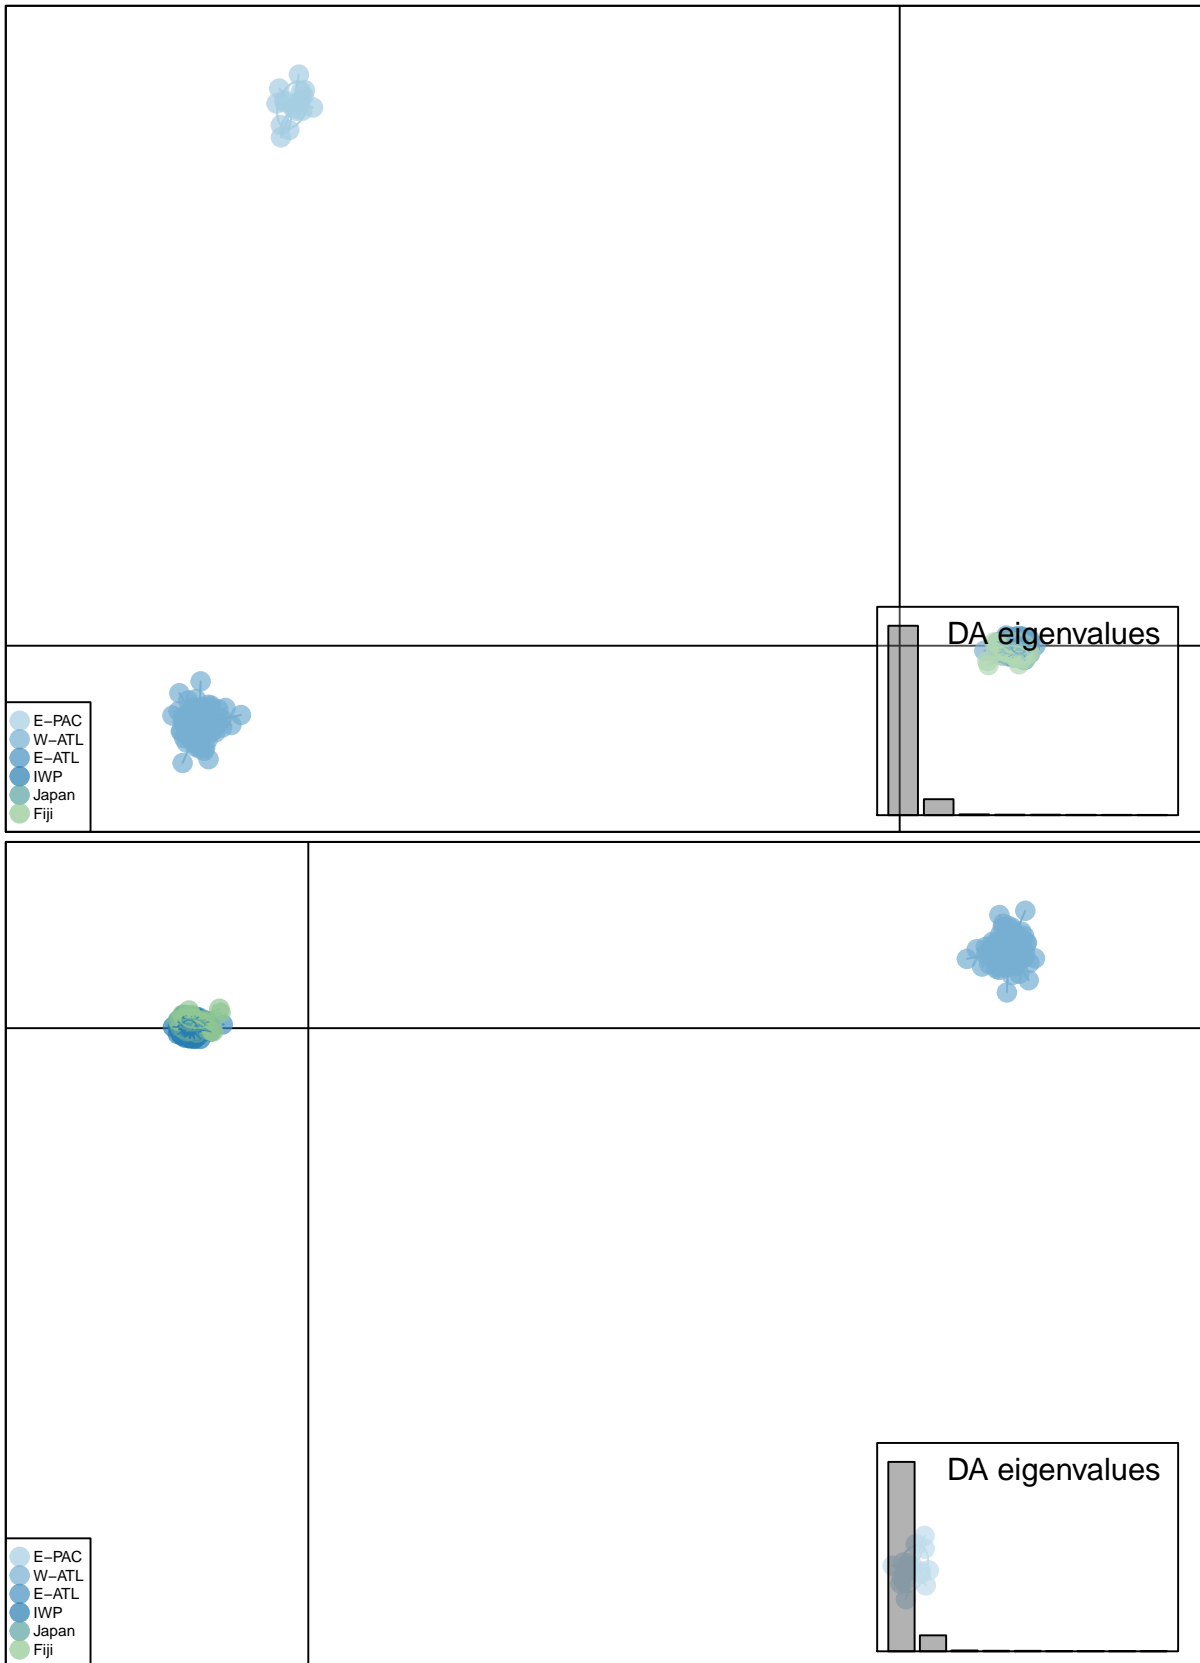

```

for (K in 2:10) {
  colour <- colours.prior[1:K]
  dapc <- get(dapc.all.object.names[K - 1])
  dapc.plot <- ade4::scatter(dapc, cex = 2, legend = TRUE, col = colour,
                             clabel = FALSE, posi.leg = "bottomleft",

```

```
        scree.pca = FALSE, posi.pca = "topleft",
        cleg = 0.75, xax = 1, yax = 2, inset.solid = 0.3)
dev.print(
  device = png,
  file = paste0("DArTcap_ALL_DAPC_scatterplot_pergroups_K",
                K, ".png"),
  width = 30,
  height = 15,
  units = "cm",
  res = 300
)
}
```

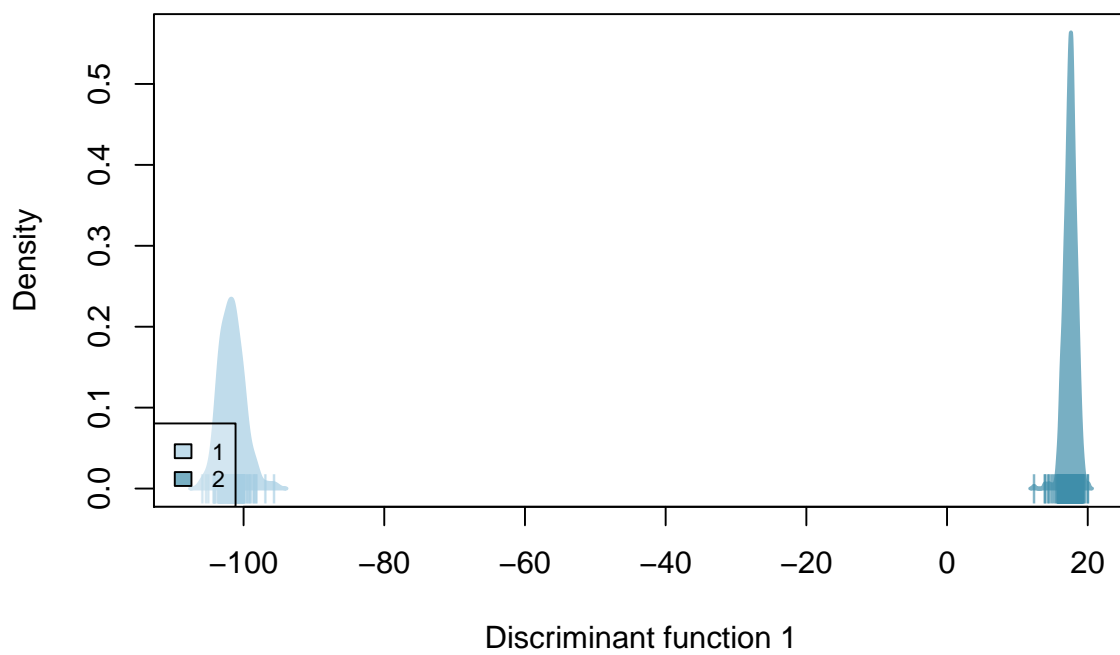

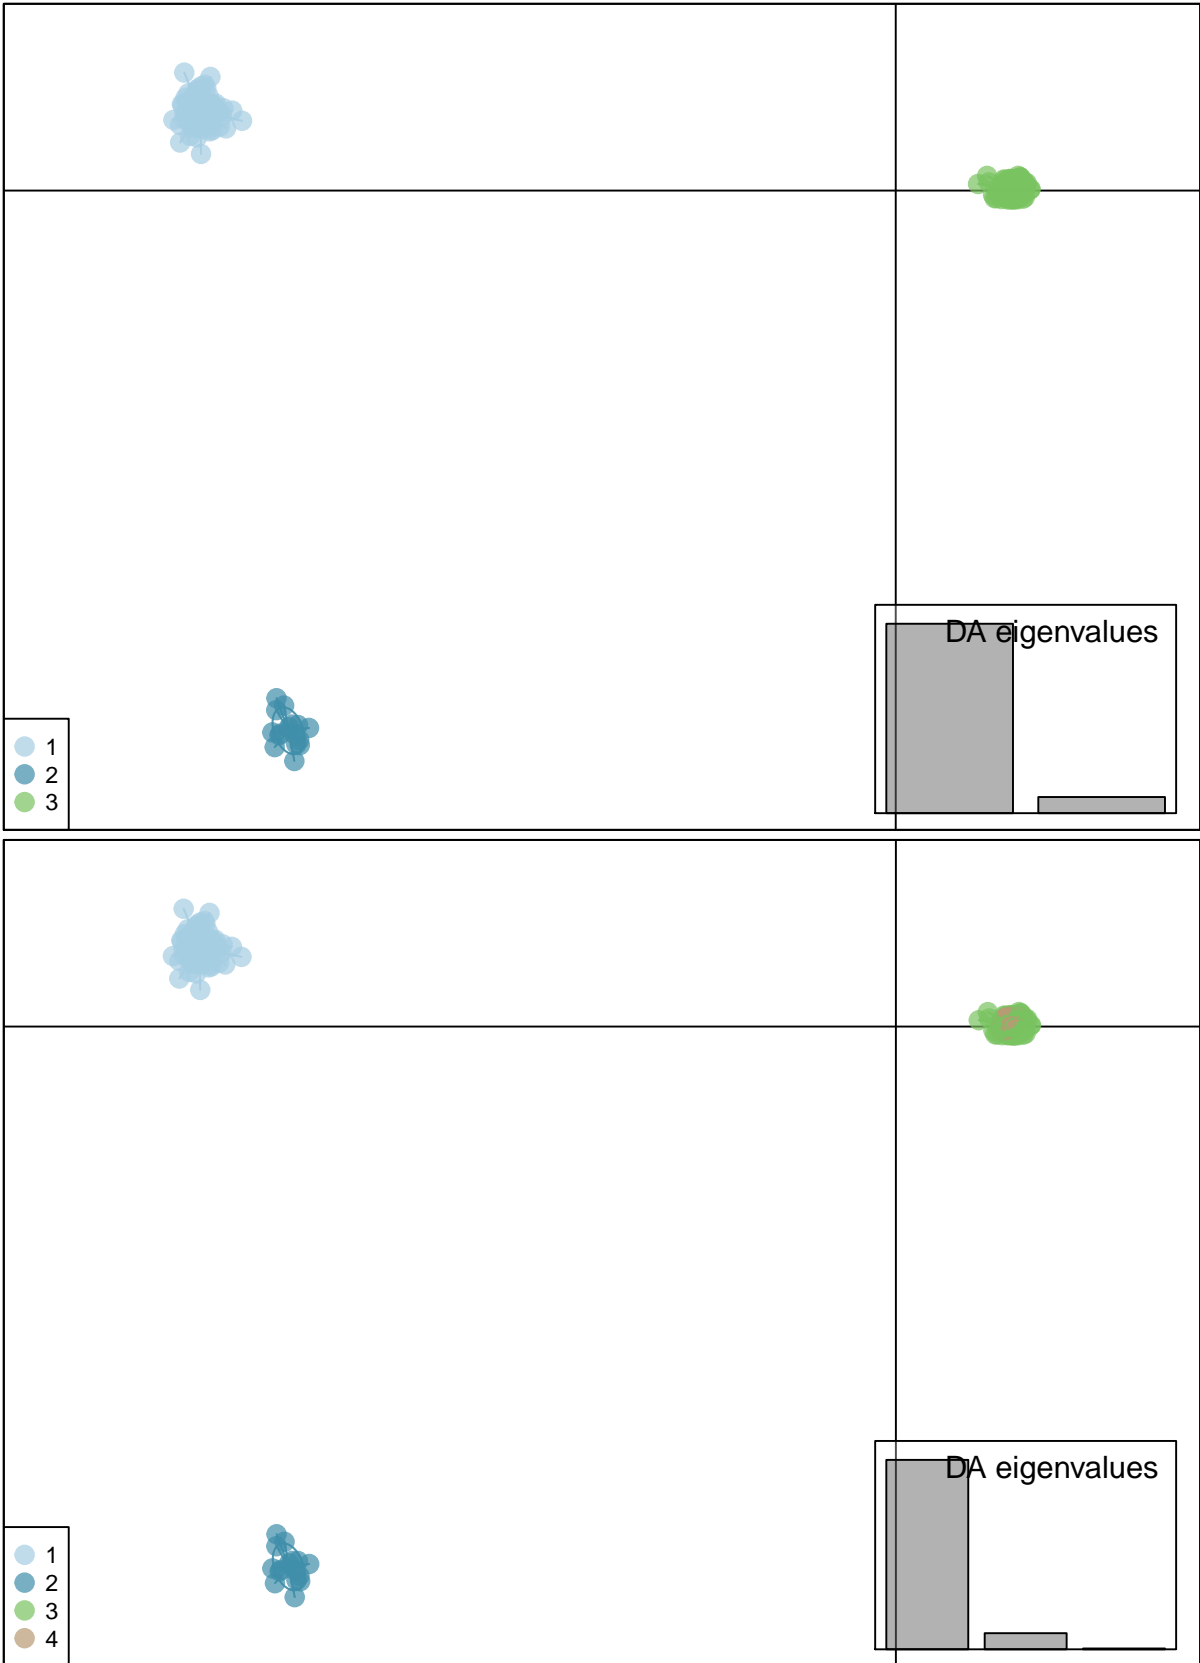

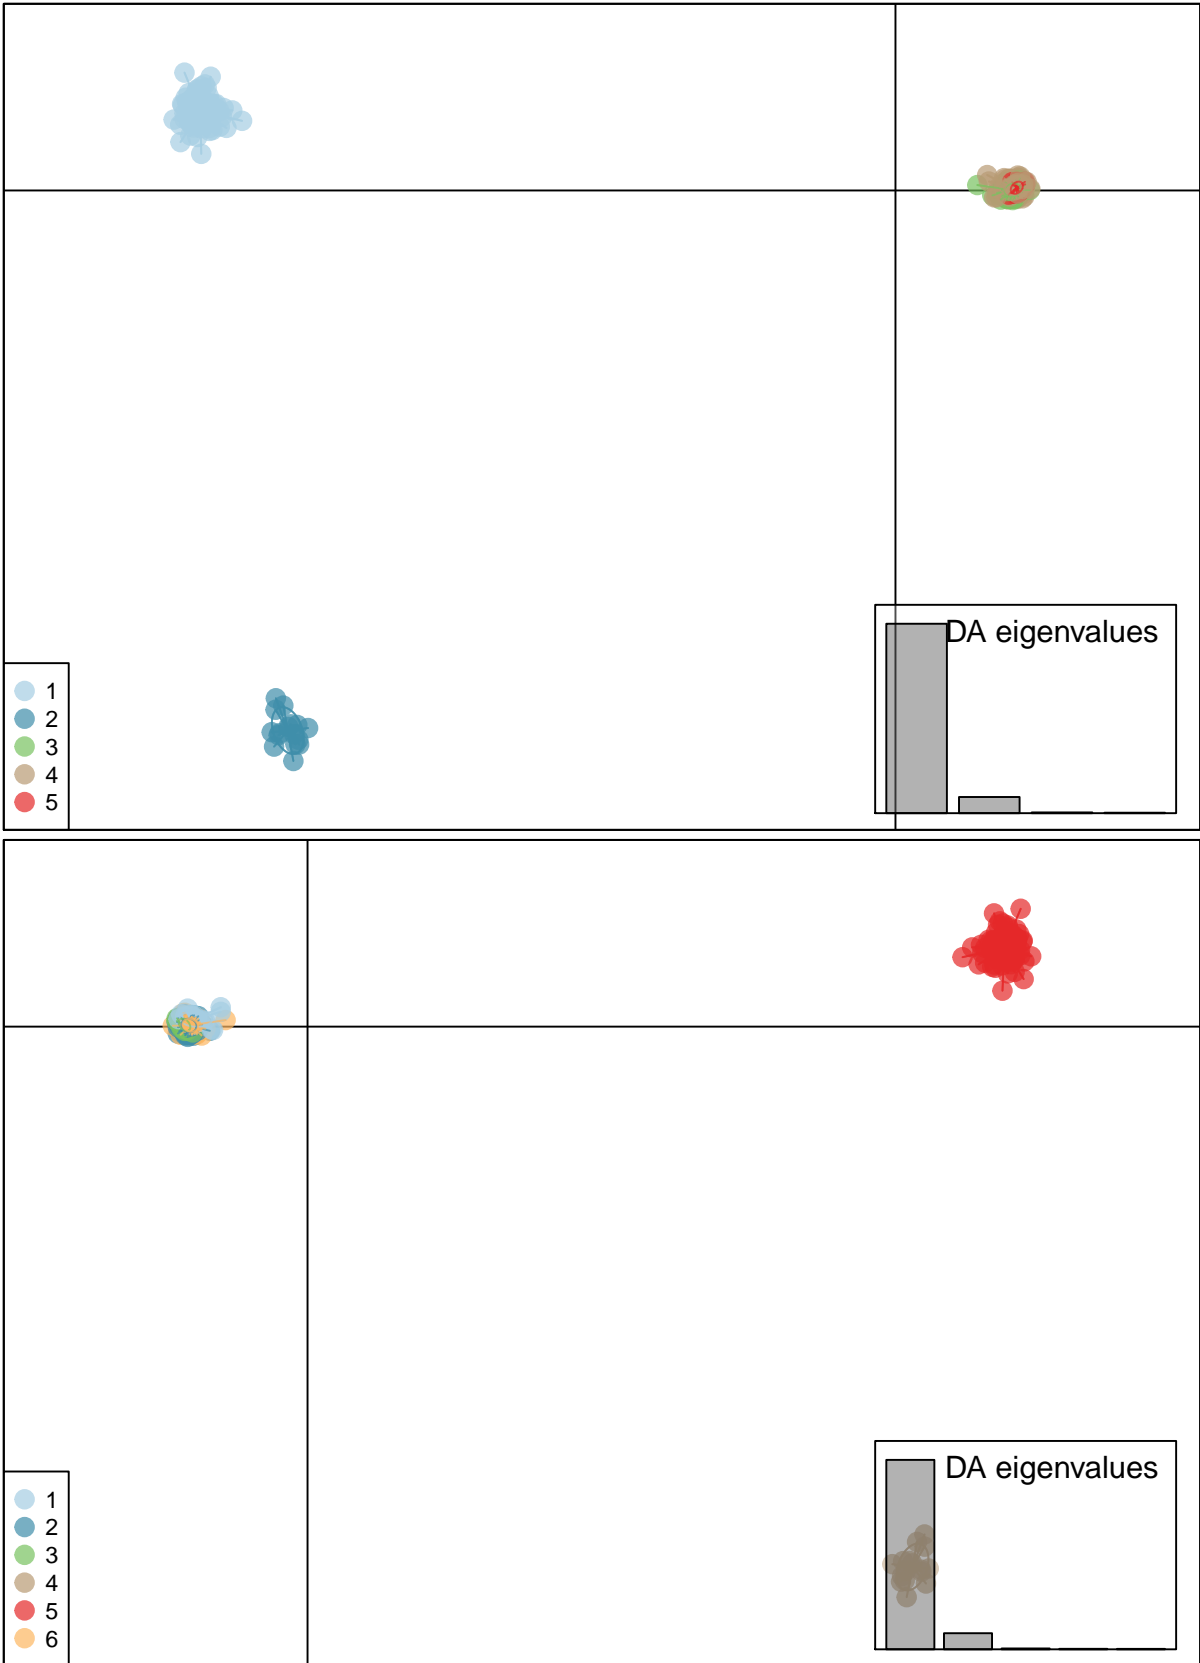

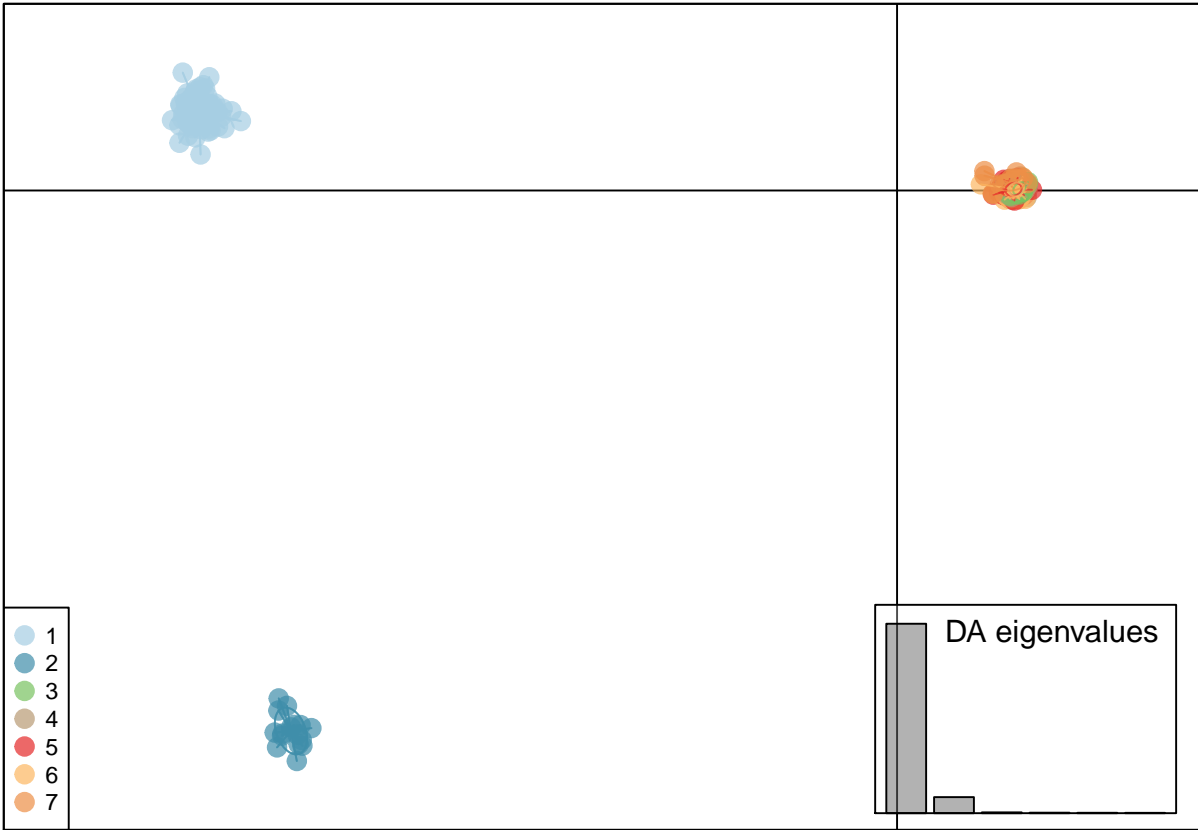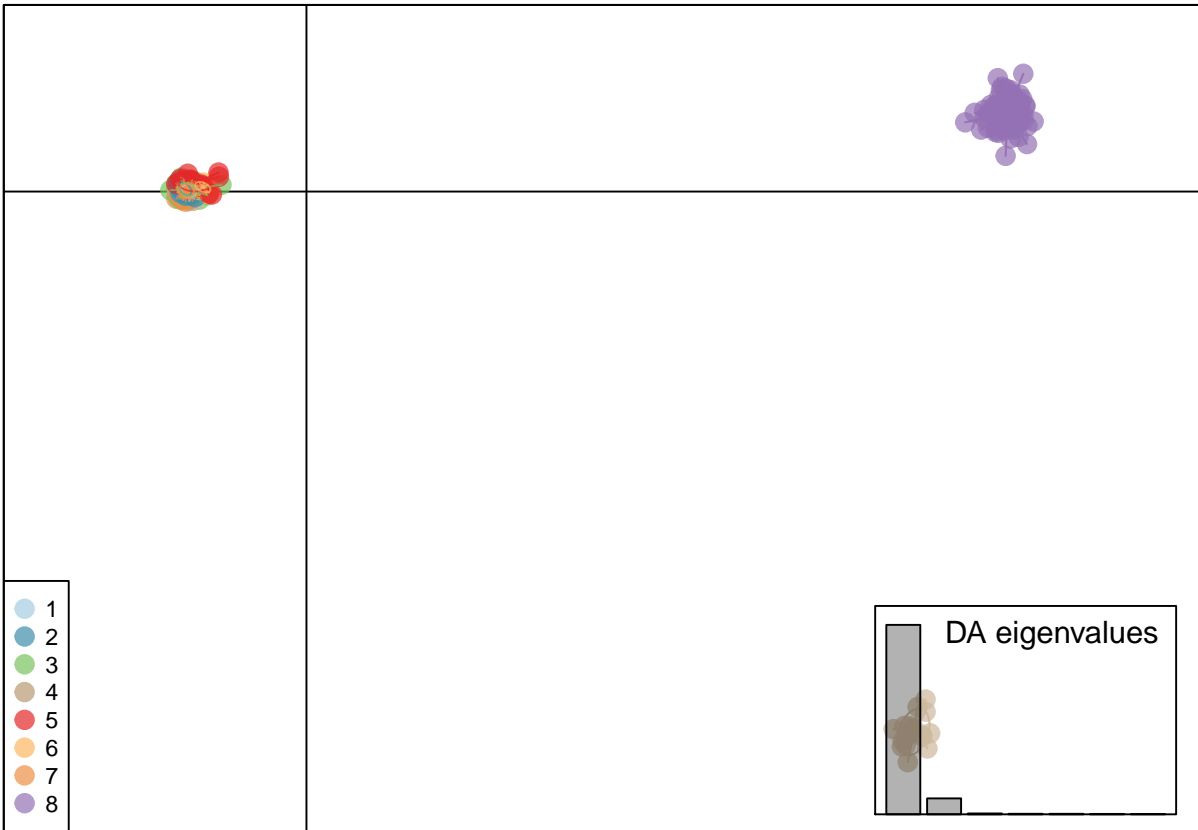

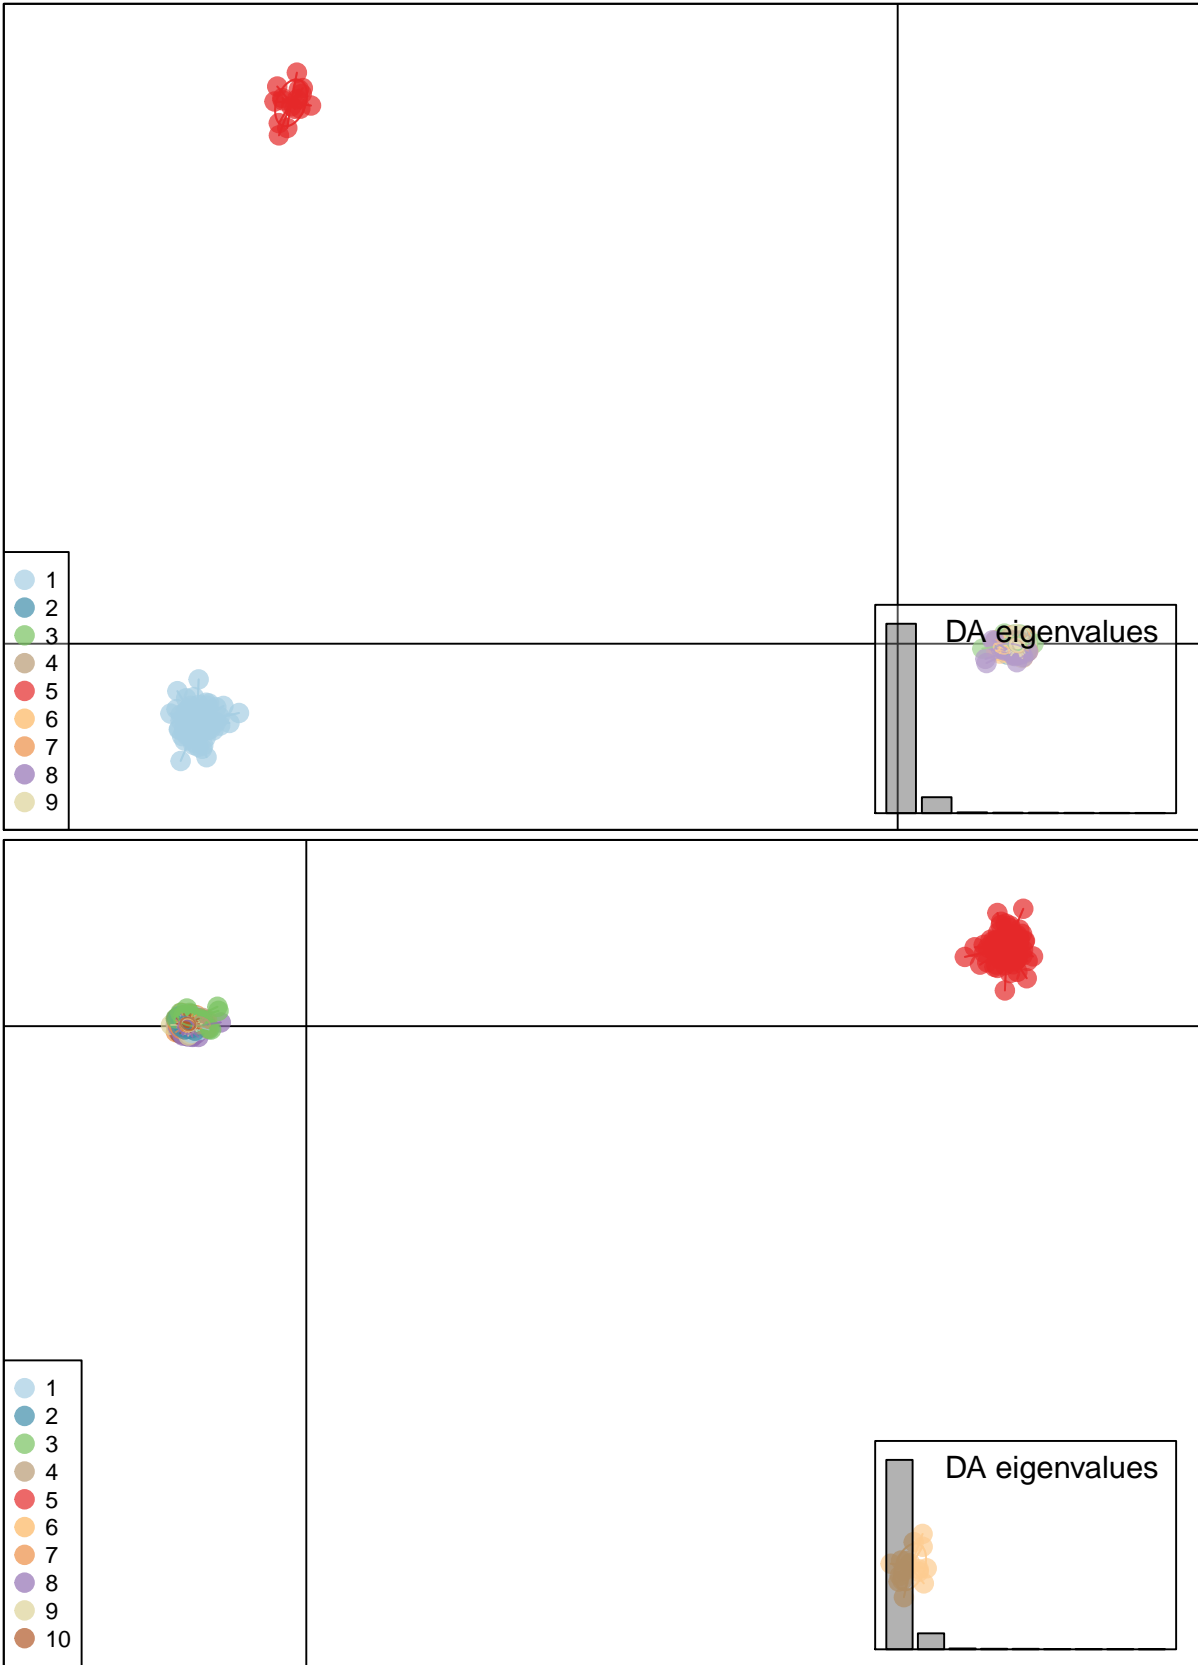

**8.9.5 DAPC scatterplot - FLO**

This code will *colour* individuals according to *sampling location* and **group** individuals according to DAPC **posterior membership**.

```

load("DARtcap_ALL_DAPC.Rdata")

for (K in 3:10) {
  dapc <- get(dapc.all.object.names[K - 1])
  x <- dapc$ind.coord[,1]
  y <- dapc$ind.coord[,2]
  group <- paste("Group", as.numeric(dapc$assign))
  pop <- BS.dartcap.gl$pop
  df <- data.frame(x, y, group, pop)
  colnames(df) <- c("x", "y", "group", "pop")
  gg <- merge(df, aggregate(cbind(mean.x = x, mean.y = y) ~ group, df, mean),
              by = "group")

  plot <- ggplot2::ggplot(gg, ggplot2::aes(x, y, color = pop)) +
    ggplot2::geom_point(size = 5) +
    ggplot2::geom_point(ggplot2::aes(x = mean.x, y = mean.y), size = 5,
                        shape = 17, color = "black") +
    ggplot2::geom_segment(ggplot2::aes(x = mean.x, y = mean.y, xend = x,
                                        yend = y)) +
    ggplot2::scale_colour_manual(values = colours.32) +
    ggplot2::scale_fill_manual(values = colours.32) +
    ggplot2::geom_hline(yintercept = 0) +
    ggplot2::geom_vline(xintercept = 0) +
    ggplot2::labs(subtitle = "",
                  y = "PC2",
                  x = "PC1",
                  title = paste0("K=", K, " & PC=", PC, sep = ""),
                  caption = "") +
    ggplot2::theme_minimal() +
    ggplot2::theme(
      axis.text = ggplot2::element_text(size = 5),
      axis.title.x = ggplot2::element_text(size = 10),
      axis.title.y = ggplot2::element_text(size = 10),
      legend.text = ggplot2::element_text(size = 7))
  print(plot)
  ggplot2::ggsave(plot, filename = paste0("DARtcap_ALL_DAPC_scatterplot2_K", K, ".png"),
                  width = 30, height = 15, units = "cm")
}

```



K=3 & PC=209

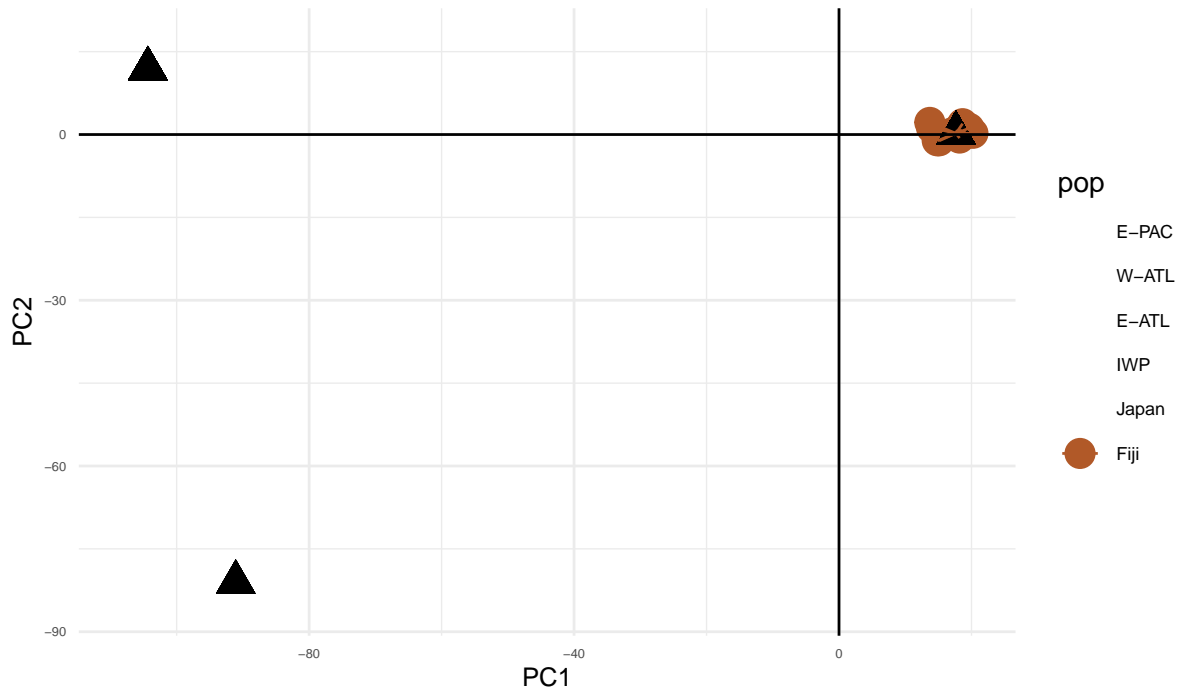

K=4 & PC=209

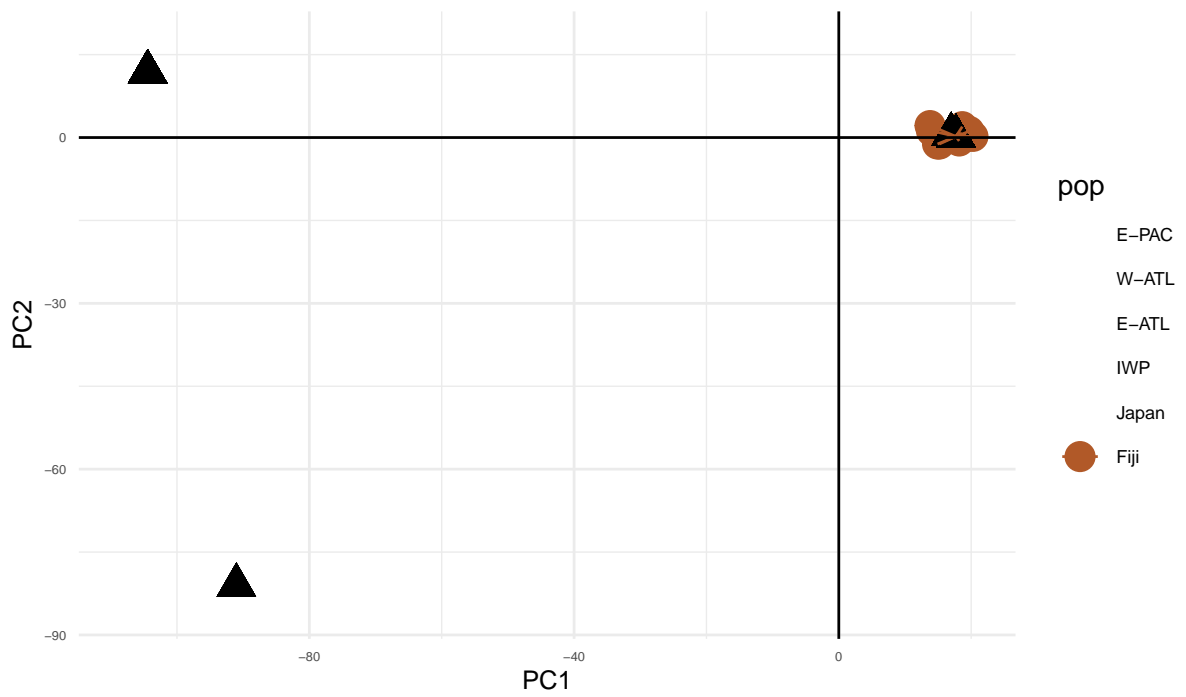

K=5 & PC=209

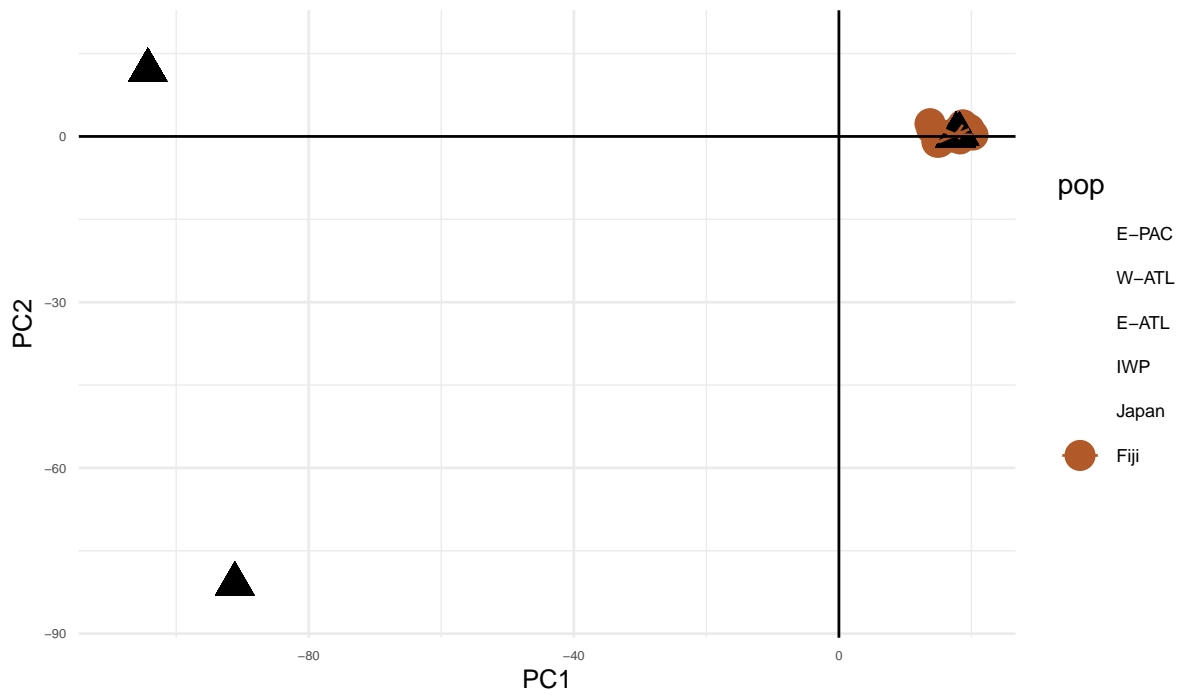

K=6 & PC=209

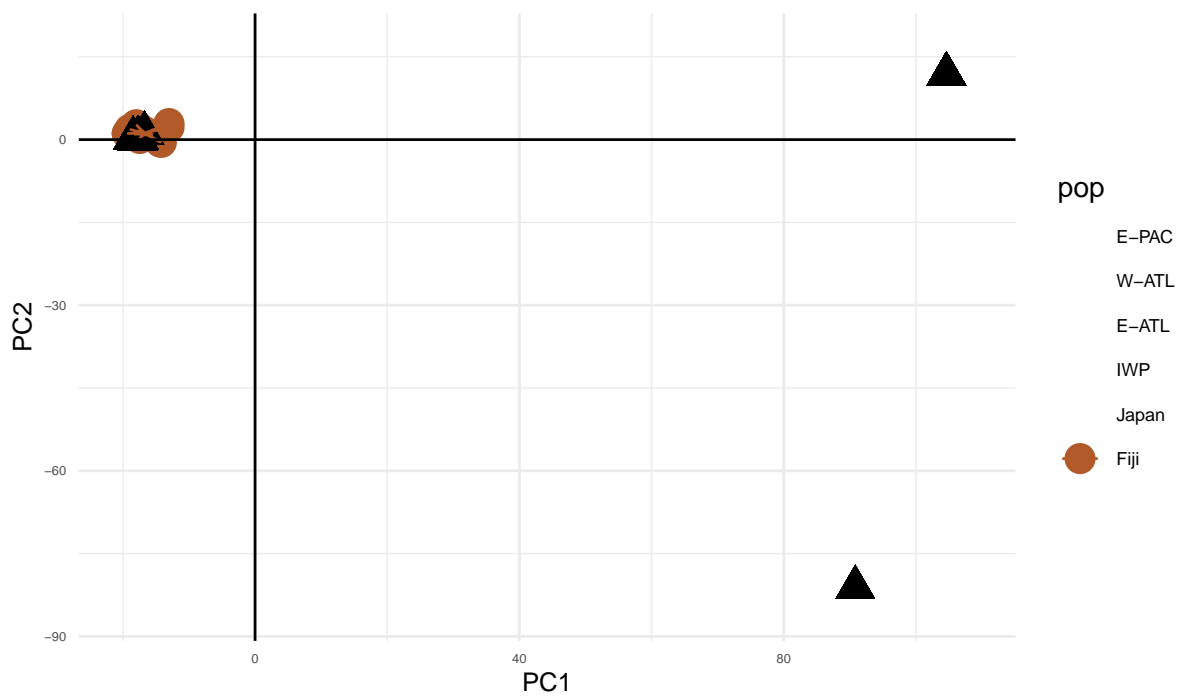

K=7 & PC=209

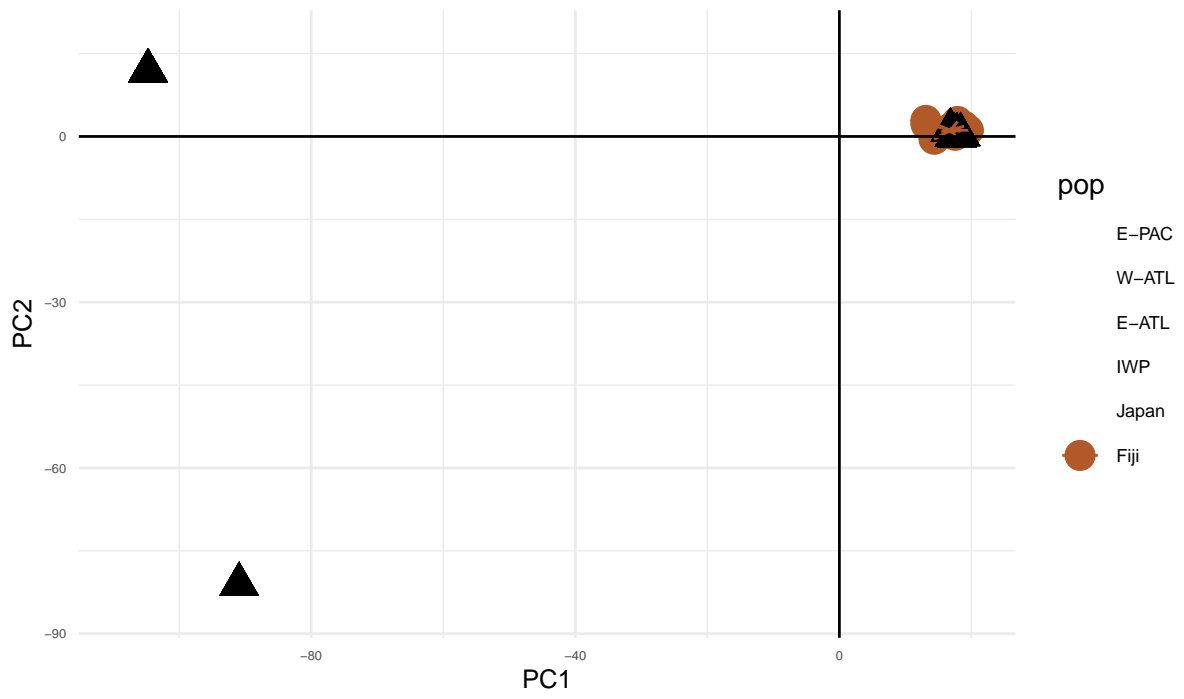

K=8 & PC=209

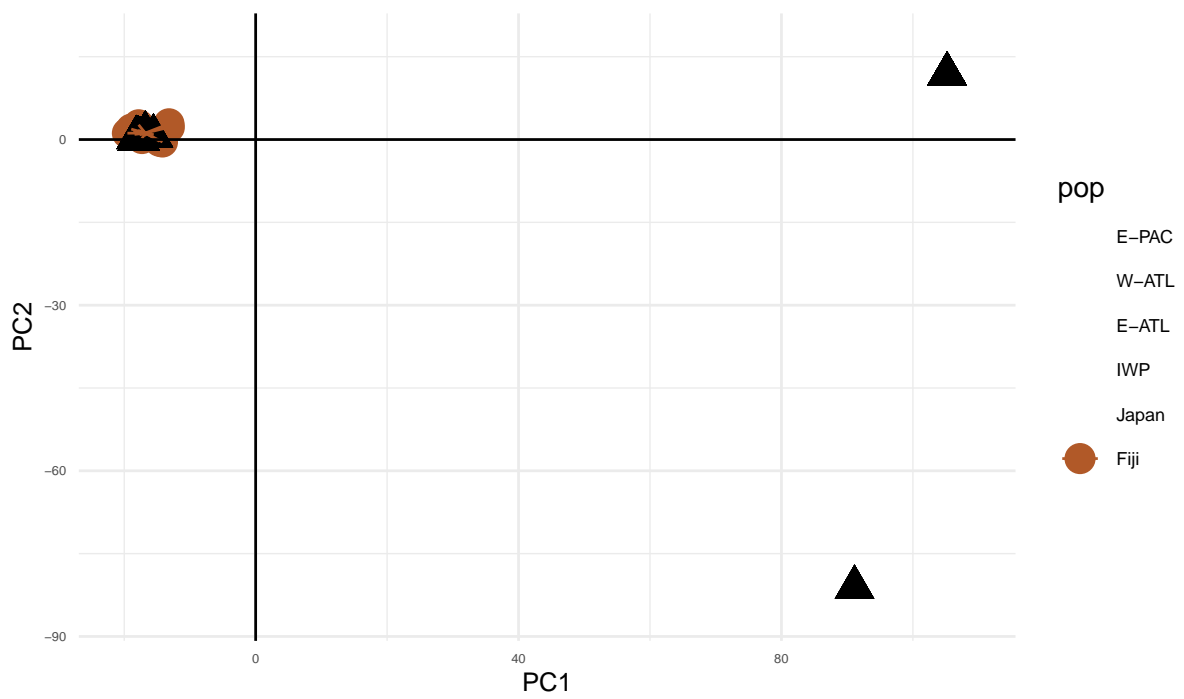

K=9 & PC=209

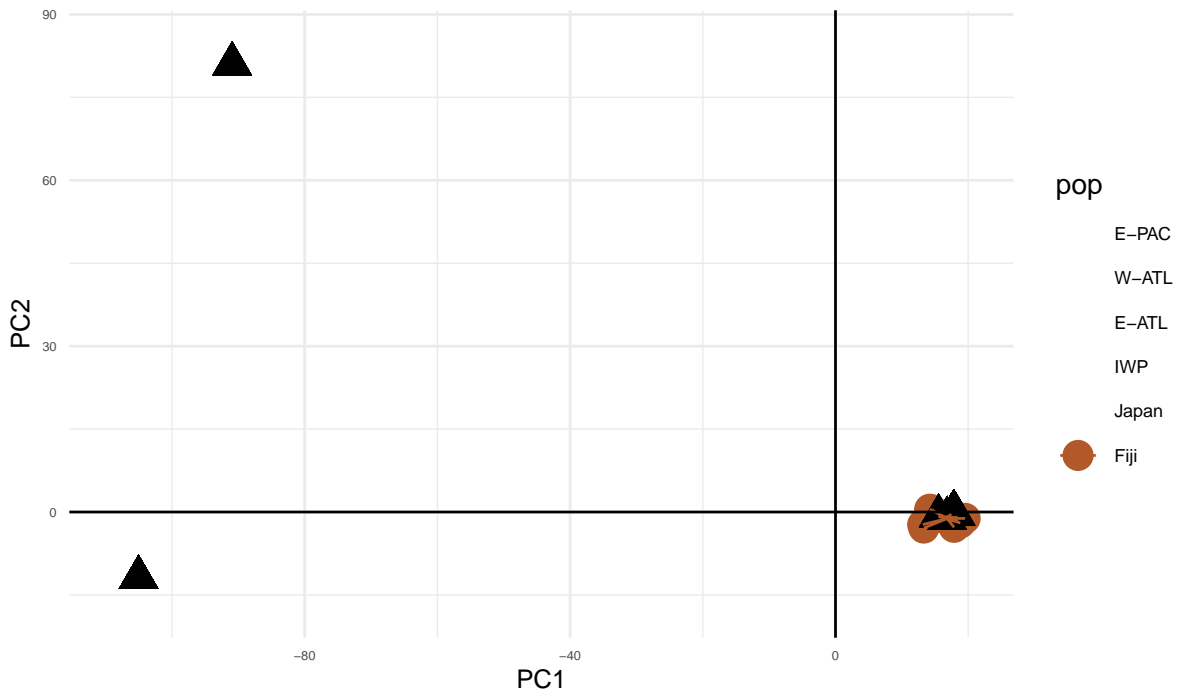

K=10 & PC=209

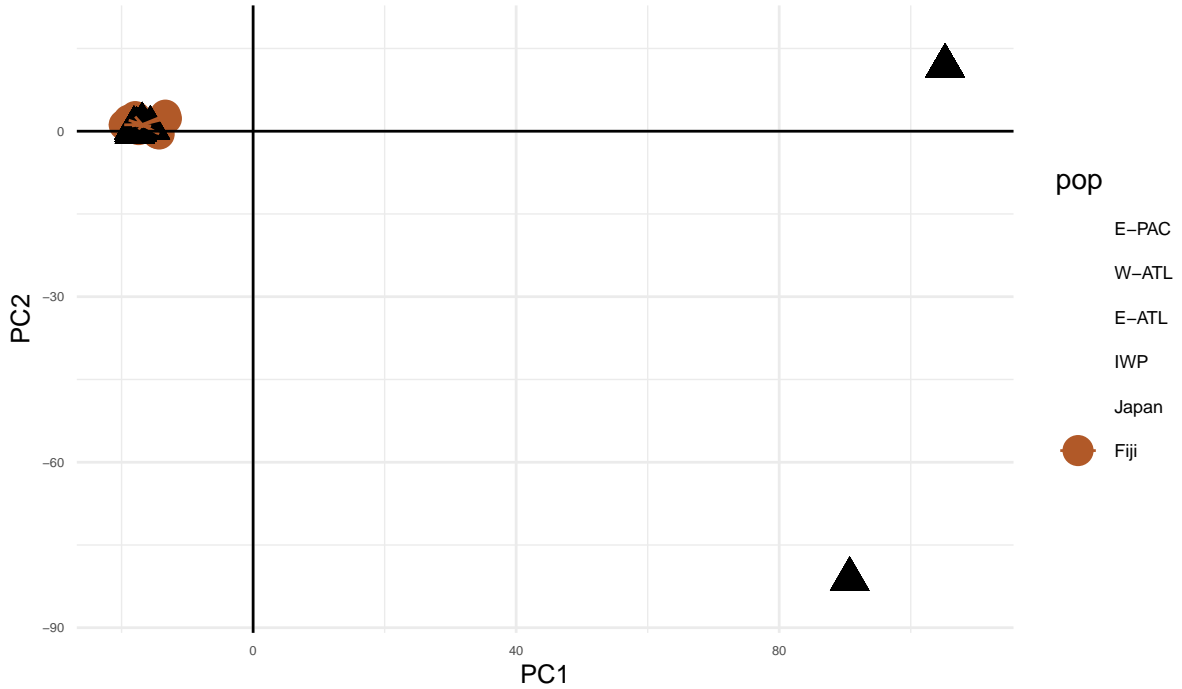

## 8.10 Provenance assignment

Using the package assignPOP to estimate the assignment success of the DArTcap data

### 8.10.1 Per Site

```

pop.levels <- c("Costa Rica" , "Brazil", "Caribbean Sea", "Gulf of Mexico",
               "Western North Atlantic", "Sierra Leone", "South Africa",
               "Mozambique", "Reunion" , "Seychelles", "Arabian Sea",
               "Sri Lanka", "Thailand", "Indonesia", "Papua New Guinea" ,
               "Australia", "Japan", "Fiji")
BS.dartcap.gl$pop <- factor(BS.dartcap.gl$other$ind.metrics$Site,
                           levels = pop.levels)

gl2gpop(BS.dartcap.gl[!BS.dartcap.gl$pop %in% c("Caribbean Sea","Sierra Leone",
                                               "Indonesia", "Thailand"),],
        filename = "DARtcap_ALL_assign_Site_genepop.txt") #too few individuals

shortnames <- c("COR", "BRZ", "GOM", "WNA", "SAF", "MOZ", "RUN" , "SEY",
               "ARS", "SRL", "PNG" , "AUS", "JAP", "FIJ")
gpop <- assignPOP::read.Genepop('DARtcap_ALL_assign_Site_genepop.txt',
                               pop.names = shortnames, haploid = FALSE, pos = 1)

assignPOP::assign.MC(
  x = gpop, train.ind = c(0.5, 0.9), train.loci = c(0.05, 0.1, 0.5, 1),
  loci.sample = 'fst', iterations = 1000, dir = 'AssignPOP_MC_Sites/', scaled = FALSE,
  pca.method = 'mixed', pca.PCs = 'kaiser-guttman', pca.loadings = F,
  model = 'svm', svm.kernel = 'linear', svm.cost = 1, ntree = 50,
  multiprocess = TRUE, processors = 3, skipQ = FALSE)

assignPOP::assign.kfold(
  x = gpop, k.fold = 8, train.loci = c(0.05, 0.1, 0.5, 1), loci.sample = 'fst',
  dir = 'AssignPOP_Kfold_Sites/', scaled = FALSE, pca.method = 'mixed',
  pca.PCs = 'kaiser-guttman', pca.loadings = F, model = 'svm',
  svm.kernel = 'linear', svm.cost = 1, ntree = 50, multiprocess = TRUE, processors = 3,
  skipQ = FALSE)

shortnames <- c("COR", "BRZ", "GOM", "WNA", "SAF", "MOZ", "RUN" , "SEY",
               "ARS", "SRL", "PNG" , "AUS", "JAP", "FIJ")
df1 <- assignPOP::accuracy.MC(dir = "AssignPOP_MC_Sites/")
MC.assign <- assignPOP::accuracy.plot(df1, pop = c("all", shortnames))
print(MC.assign)

```

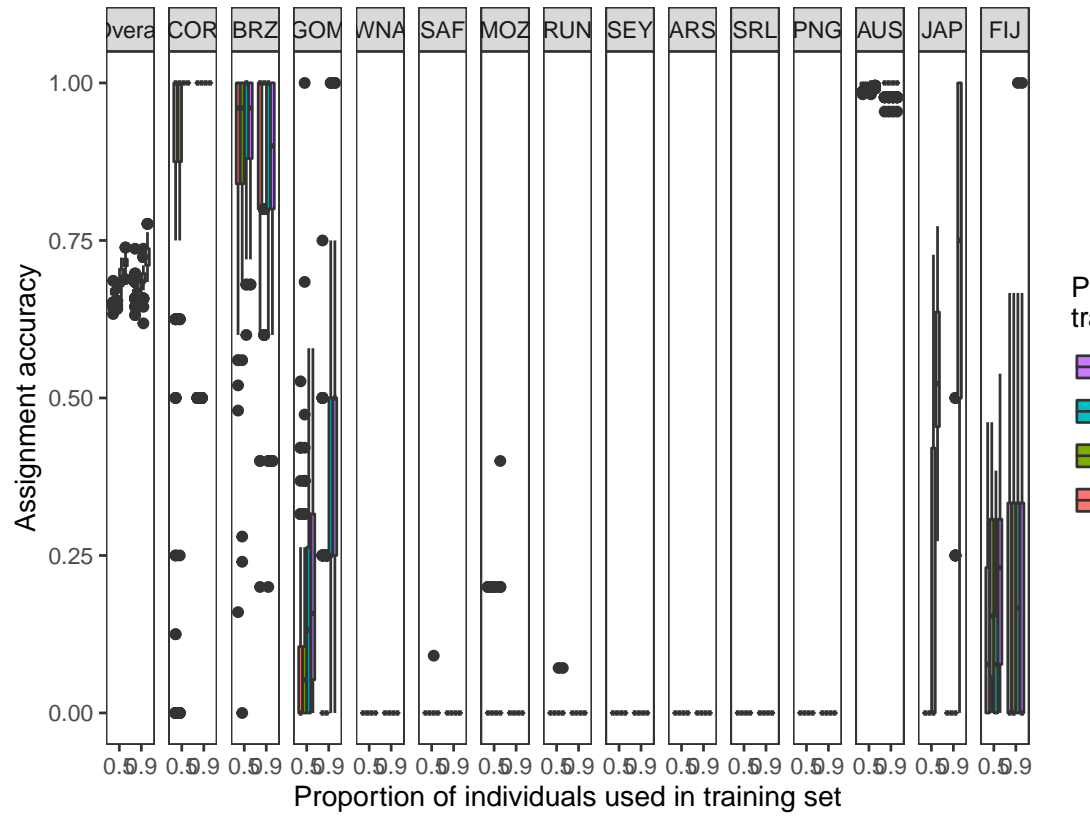

### 8.10.1.1 AssignPOP

```
ggplot2::ggsave(MC.assign, filename = "DArTcap_ALL_assignPOP_MC_Sites.png",
  width = 30, height = 15, units = "cm")

df2 <- assignPOP::accuracy.kfold(dir = "AssignPOP_Kfold_Sites/")
kfold.assign <- assignPOP::accuracy.plot(df2, pop = c("all", shortnames))
print(kfold.assign)
```

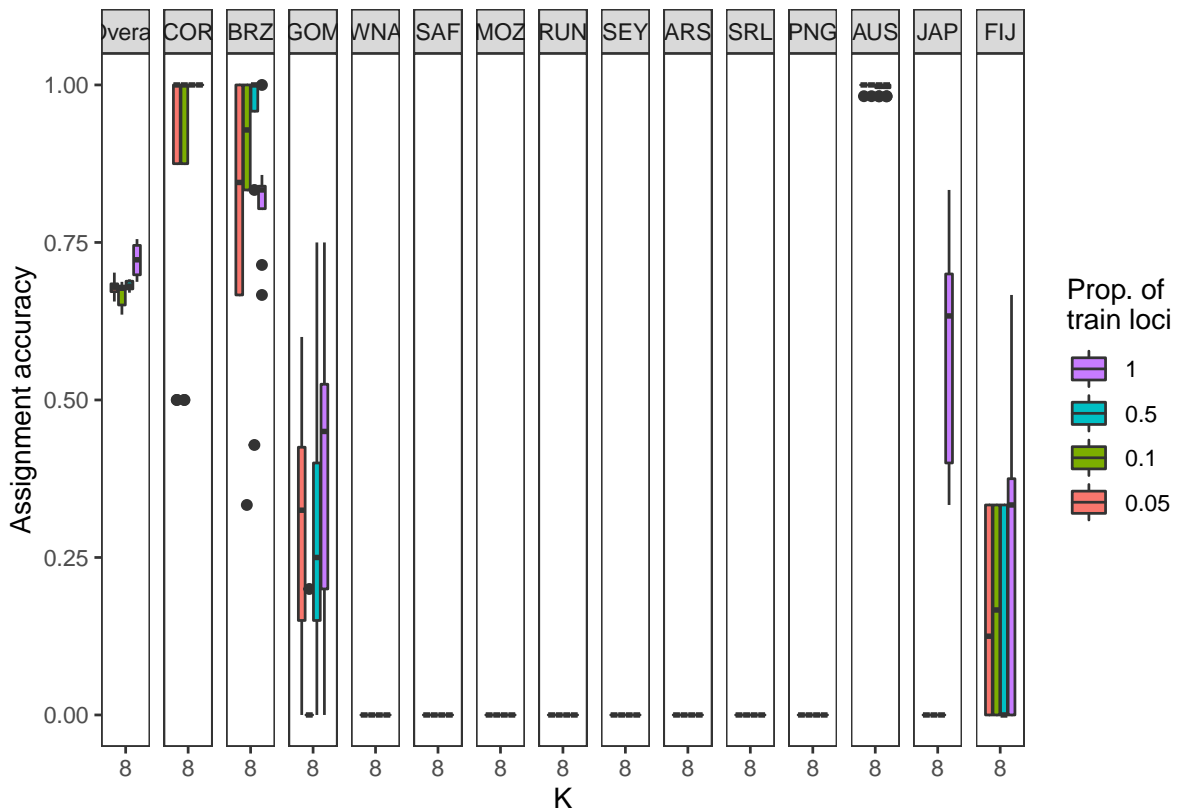

```
ggplot2::ggsave(kfold.assign, filename = "DArTcap_ALL_assignPOP_Kfold_Sites.png",
                width = 30, height = 15, units = "cm")
```

```
names(colours.14) <- shortnames
# memb.plot <- assignPOP::membership.plot(dir = "AssignPOP_Kfold_Sites/",
#                                       style = 1,
#                                       non.genetic = TRUE)
# #choose proportion training loci = 1
# # save(memb.plot, file = "memb.plot1.Rdata")
load("memb.plot1.Rdata")
memb.plot$data$origin.pop <- factor(memb.plot$data$origin.pop,
                                   levels = shortnames)
memb.plot + ggplot2::scale_fill_manual(values = colours.14) +
  ggplot2::theme(axis.text.x = ggplot2::element_blank())
```

K = 8 , training locus proportion = 1

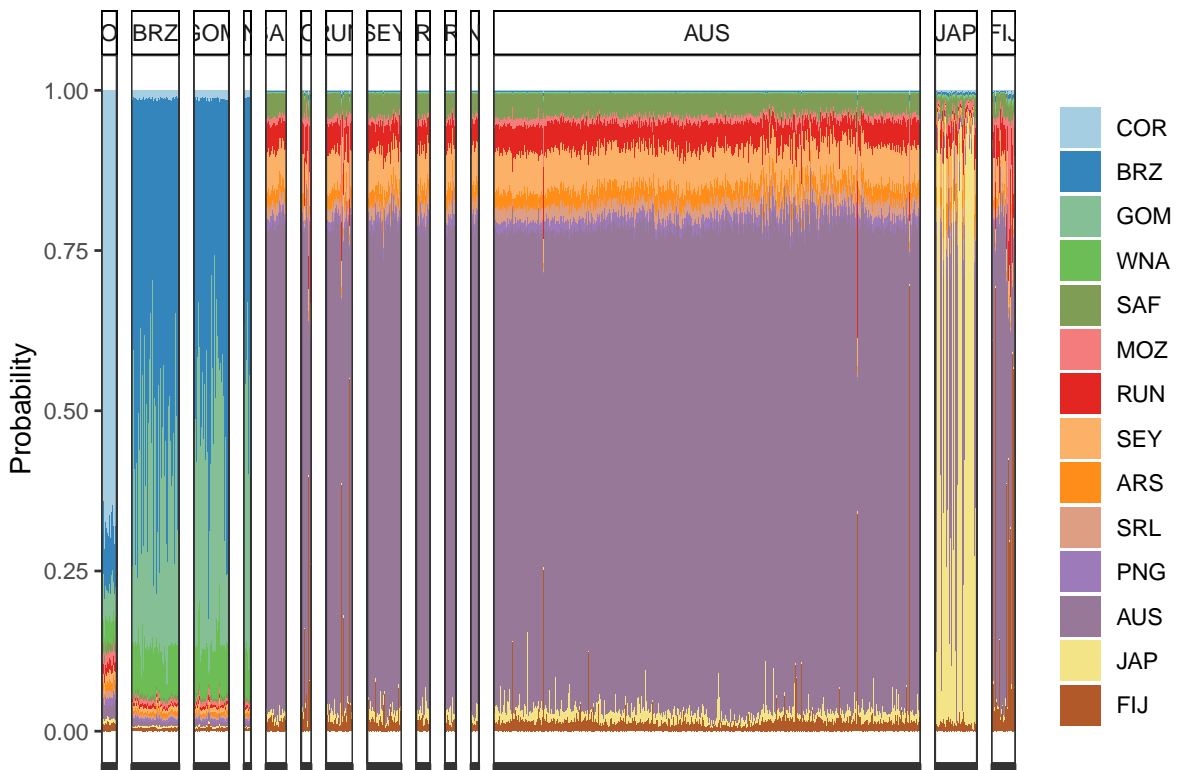

```
ggplot2::ggsave(memb.plot,
  filename = "DARtcap_ALL_assignPOP_Kfold_membership_Sites.png",
  width = 30, height = 15, units = "cm")
```

```
df <- data.frame(
  ind = as.character(memb.plot$data$Ind.ID)[
    as.character(memb.plot$data$fold_n) == "fold_8"],
  pop = as.character(memb.plot$data$origin.pop)[
    as.character(memb.plot$data$fold_n) == "fold_8"],
  memb = as.character(memb.plot$data$pred.pop)[
    as.character(memb.plot$data$fold_n) == "fold_8"], stringsAsFactors = FALSE)
```

```
summary(df$pop[df$pop != df$memb]) # not a great assignment success
```

```
##
```

```
## Correct assignment rates were estimated!!
```

```
## A total of 800 assignment tests for 14 pops.
```

```
## Results were also saved in a 'Rate_of_800_tests_14_pops.txt' file in the directory.
```

```
## Correct assignment rates were estimated!!
```

```
## A total of 32 assignment tests for 14 pops.
```

```
## Results were also saved in a 'Rate_of_32_tests_14_pops.txt' file in the directory.
```

```
## GOM RUN SEY SAF ARS FIJ JAP AUS BRZ MOZ
```

```
## 70 56 56 42 28 28 28 14 14 14
```

the 10 mos

```
pop.levels1 <- c("Costa Rica" , "Brazil","Caribbean Sea","Gulf of Mexico",
  "Western North Atlantic" , "Sierra Leone" , "South Africa",
  "Mozambique" , "Reunion" , "Seychelles" , "Arabian Sea",
  "Sri Lanka" , "Thailand" , "Indonesia" , "Papua New Guinea" ,
  "Fitzroy River" , "Daly River" , "Adelaide River","Darwin Coastal",
```



```

"South Alligator River", "East Alligator River", "Blue mud Bay",
"Roper River", "Town's River", "Unknown", "Wenlock River",
"Trinity inlet", "Clarence River", "Sydney Harbour", "Okinawa",
"Urauchi River", "Fiji")
pop.levels2 <- c("Costa Rica" , "Brazil", "Caribbean Sea", "Gulf of Mexico",
"Western North Atlantic", "Sierra Leone", "South Africa",
"Mozambique", "Reunion" , "Seychelles", "Arabian Sea", "Sri Lanka",
"Thailand", "Indonesia", "Papua New Guinea" , "Australia",
"Japan", "Fiji")

BS.dartcap.rubias2 <- BS.dartcap.rubias
# BS.dartcap.rubias2$indiv == BS.dartcap.gt@schemes$INDIVIDUALS

BS.dartcap.rubias2$collection <- factor(BS.dartcap.gt@schemes$Site2,
levels = pop.levels1)
BS.dartcap.rubias2$repunit <- factor(BS.dartcap.gt@schemes$Site,
levels = pop.levels2)
BS.dartcap.rubias2 <- BS.dartcap.rubias2[order(BS.dartcap.rubias2$repunit,
BS.dartcap.rubias2$collection),]

BS.dartcap.rubias2 %<>%
  dplyr::mutate_all(as.character)

BS_sims <- rubias:::assess_reference_loo(reference = BS.dartcap.rubias2,
gen_start_col = 5,
reps = 5,
mixsize = 200,
return_indiv_posteriors = TRUE,
resampling_unit = "gene_copies")

repu_pofzs <- BS_sims$indiv_posteriors %>%
  dplyr::filter(repunit == simulated_repunit) %>%
  dplyr::group_by(iter, indiv, simulated_collection, repunit) %>%
  dplyr::summarise(repu_PofZ = sum(PofZ)) %>%
  dplyr::ungroup() %>%
  dplyr::arrange(repunit, simulated_collection) %>%
  dplyr::mutate(simulated_collection = factor(simulated_collection,
levels = unique(simulated_collection)))

num_simmed <- BS_sims$indiv_posteriors %>%
  dplyr::group_by(iter, indiv) %>%
  dplyr::slice(1) %>%
  dplyr::ungroup() %>%
  dplyr::count(simulated_collection)

num_simmed <- num_simmed[order(factor(num_simmed$simulated_collection,
levels = pop.levels1)),]
repu_pofzs$repunit <- factor(repu_pofzs$repunit, levels = pop.levels2)
repu_pofzs$simulated_collection <- factor(repu_pofzs$simulated_collection,
levels = pop.levels1)
repu_pofzs <- repu_pofzs[order(repu_pofzs$repunit, repu_pofzs$simulated_collection),]

plot <- ggplot2::ggplot(repu_pofzs, ggplot2::aes(x = simulated_collection,
y = repu_PofZ)) +
  ggplot2::geom_boxplot(ggplot2::aes(colour = repunit)) +
  ggplot2::scale_color_manual(values = colours.18) +
  ggplot2::geom_text(data = num_simmed, mapping = aes(y = 1.025, label = n),

```

```

    angle = 90, hjust = 0, vjust = 0.5, size = 3) +
  ggplot2::labs(subtitle = "",
    y = "Assignment success",
    x = "Collection site") +
  ggplot2::theme(axis.text.x = ggplot2::element_text(angle = 90, hjust = 1,
    size = 9, vjust = 0.5)) +

  ggplot2::ylim(c(NA, 1.05))
print(plot)

```

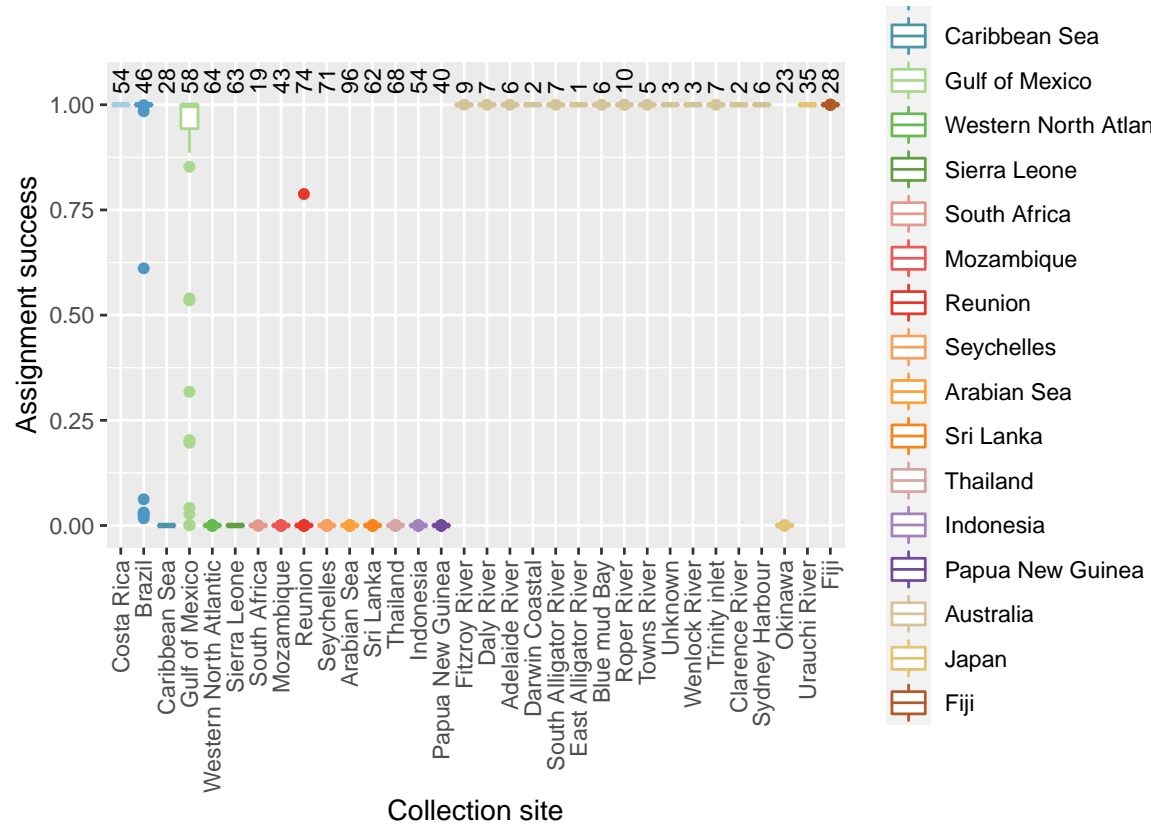

### 8.10.1.2 Rubias

```

ggplot2::ggsave(plot,
  filename = "DARtcap_ALL_Assign_Rubias_Sites_Assignment_success.png",
  width = 30, height = 15, units = "cm")

reunit_BS <- unique(BS.dartcap.rubias2$reunit)
BS_corr <- BS_sims$mixing_proportions %>%
  dplyr::mutate(reunit = ifelse(reunit %in% reunit_BS, reunit, "OTHER")) %>%
  dplyr::group_by(iter, reunit) %>%
  dplyr::summarise(true_reprop = sum(true_pi),
    reprop_posterior_mean = sum(post_mean_pi),
    repu_n = sum(n)) %>%
  dplyr::mutate(repu_n_prop = repu_n / sum(repu_n))

BS_corr$reunit <- factor(BS_corr$reunit, levels = pop.levels2)
plot <- ggplot2::ggplot(BS_corr, ggplot2::aes(x = repu_n_prop,
  y = reprop_posterior_mean,
  colour = reunit)) +

  ggplot2::geom_point(size = 5) +
  ggplot2::scale_color_manual(values = colours.18) +
  ggplot2::geom_abline(intercept = 0, slope = 1) +
  ggplot2::facet_wrap(~ reunit)
print(plot)

```

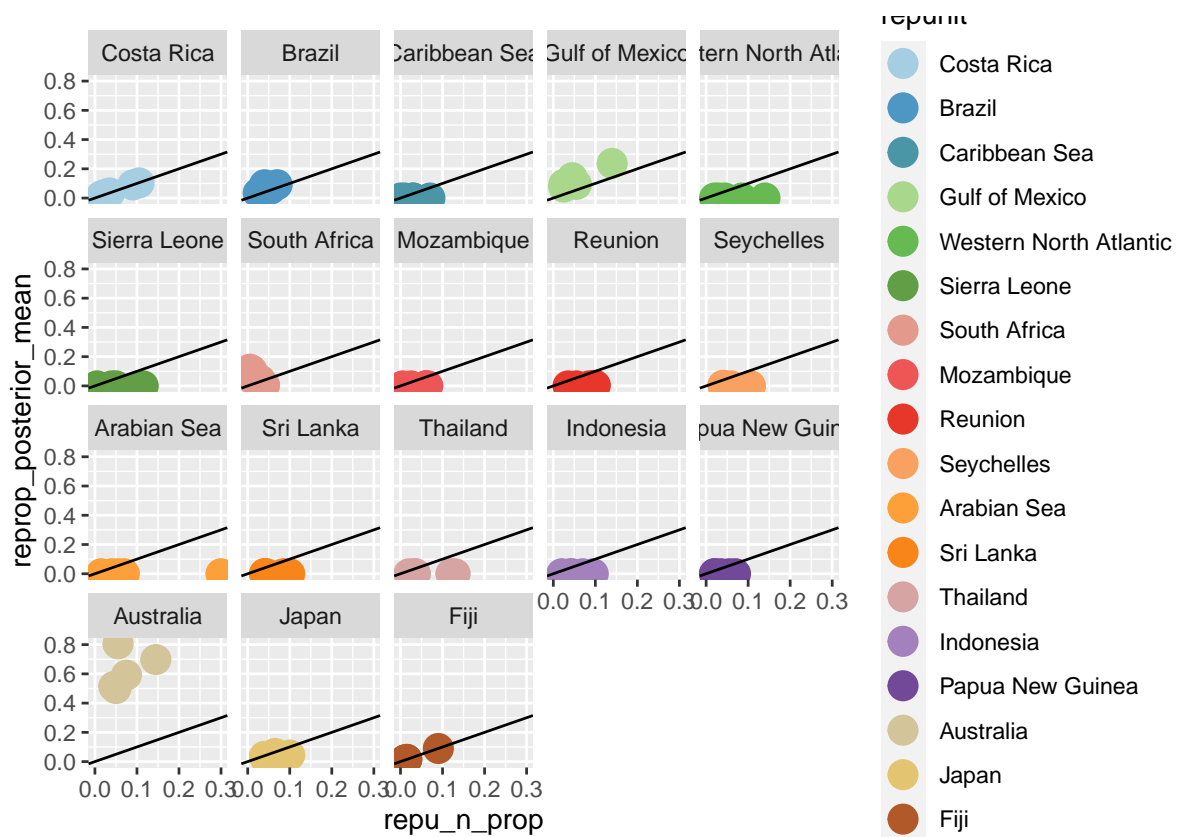

```
ggplot2::ggsave(plot, filename = "DArTcap_ALL_Assign_Rubias_Sites_correlation.png",
  width = 30, height = 15, units = "cm")
```

### 8.10.2 Per region

```
strata <- BS.dartcap.gl$other$ind.metrics$Region
strata[strata %in% c("W-IO", "N-IO", "E-IO", "W-PAC", "E-IO/W-PAC")] <- "IWP"
pop.levels <- c("E-PAC", "W-ATL", "E-ATL", "IWP", "Japan", "Fiji")
BS.dartcap.gl$pop <- factor(strata, levels = pop.levels)
BS.dartcap.gl <- BS.dartcap.gl[order(BS.dartcap.gl$pop, BS.dartcap.gl$ind.names)]

gl2gpop(BS.dartcap.gl[BS.dartcap.gl$pop != "E-ATL", ],
  filename = "DArTcap_ALL_assign_Region_genepop.txt") #too few individuals
shortnames <- c("E-PAC", "W-ATL", "IWP", "Japan", "Fiji")
gpop <- assignPOP::read.Genepop(
  'DArTcap_ALL_assign_Region_genepop.txt',
  pop.names = shortnames,
  haploid = FALSE,
  pos = 1
)

assignPOP::assign.MC(
  x = gpop, train.inds = c(0.1, 0.5, 0.9), train.loci = c(0.05, 0.1, 0.5, 1),
  loci.sample = 'fst', iterations = 1000, dir = 'AssignPOP_MC_Regions/', scaled = FALSE,
  pca.method = 'mixed', pca.PCs = 'kaiser-guttman', pca.loadings = F,
  model = 'svm', svm.kernel = 'linear', svm.cost = 1, ntree = 50,
  multiprocessing = TRUE, processors = 3, skipQ = FALSE)

assignPOP::assign.kfold(
  x = gpop, k.fold = 10, train.loci = c(0.1, 0.5, 1), loci.sample = 'fst',
```

```
dir = 'AssignPOP_Kfold_Region/', scaled = FALSE, pca.method = 'mixed',
pca.PCs = 'kaiser-guttman', pca.loadings = F, model = 'svm',
svm.kernel = 'linear', svm.cost = 1, ntree = 50, multiprocessing = TRUE, processors = 3,
skipQ = FALSE)
```

```
shortnames <- c("E-PAC", "W-ATL", "IWP", "Japan", "Fiji")
df1 <- assignPOP::accuracy.MC(dir = "AssignPOP_MC_Regions/")
MC.assign <- assignPOP::accuracy.plot(df1, pop = c("all", shortnames))
print(MC.assign)
```

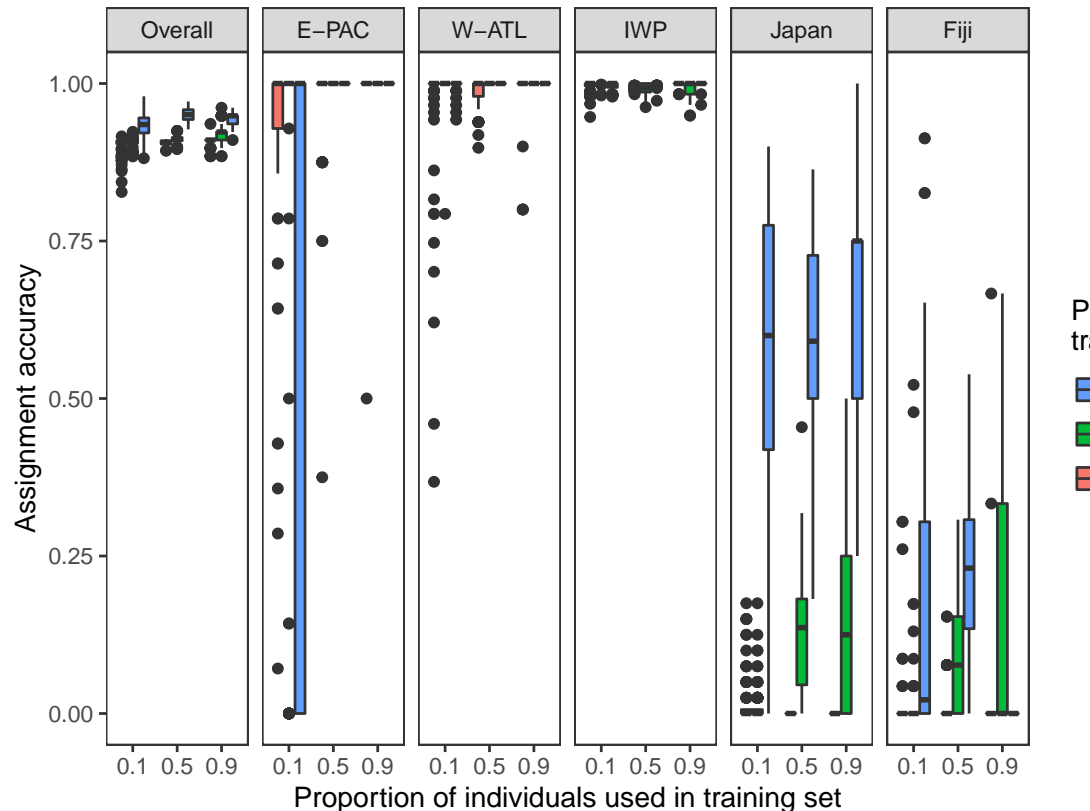

### 8.10.2.1 AssignPOP

```
ggplot2::ggsave(MC.assign, filename = "DARTcap_ALL_assignPOP_MC_Regions.png",
width = 30, height = 15, units = "cm")
```

```
df2 <- assignPOP::accuracy.kfold(dir = "AssignPOP_Kfold_Region/")
kfold.assign <- assignPOP::accuracy.plot(df2, pop = c("all", shortnames))
print(kfold.assign)
```

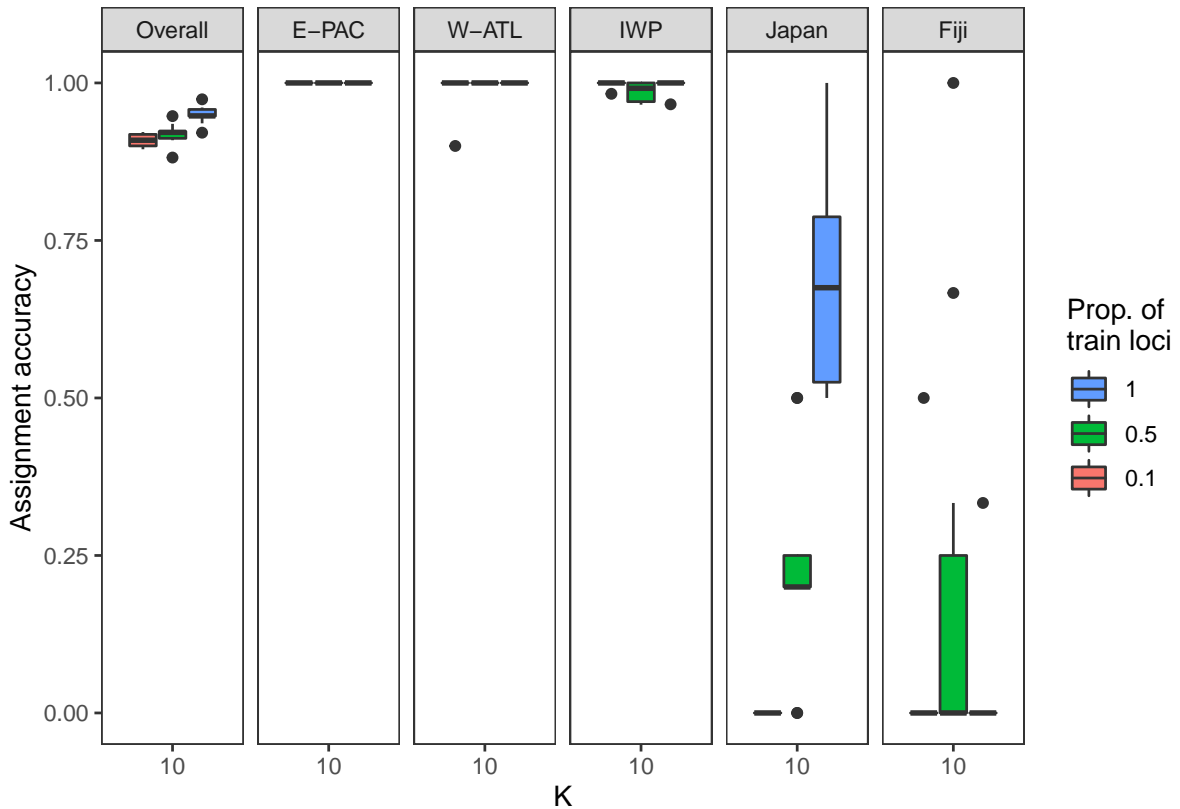

```

ggplot2::ggsave(kfold.assign, filename = "DARtcap_ALL_assignPOP_Kfold_Regions.png",
                width = 30, height = 15, units = "cm")

shortnames1 <- c("E.PAC", "W.ATL", "IWP", "Japan", "Fiji")
colours.5 <- adegenet::funky(5)
names(colours.5) <- shortnames1
# memb.plot <- assignPOP::membership.plot(dir = "AssignPOP_Kfold_Region/",
#                                       style = 1,
#                                       non.genetic = TRUE)
# # choose proportion training loci = 1
# save(memb.plot, file = "memb.plot2.Rdata")
load("memb.plot2.Rdata")
memb.plot$data$origin.pop <- factor(memb.plot$data$origin.pop,
                                   levels = shortnames)
memb.plot + ggplot2::scale_fill_manual(values = colours.5) +
ggplot2::theme(axis.text.x = ggplot2::element_blank())

```

K = 10 , training locus proportion = 1

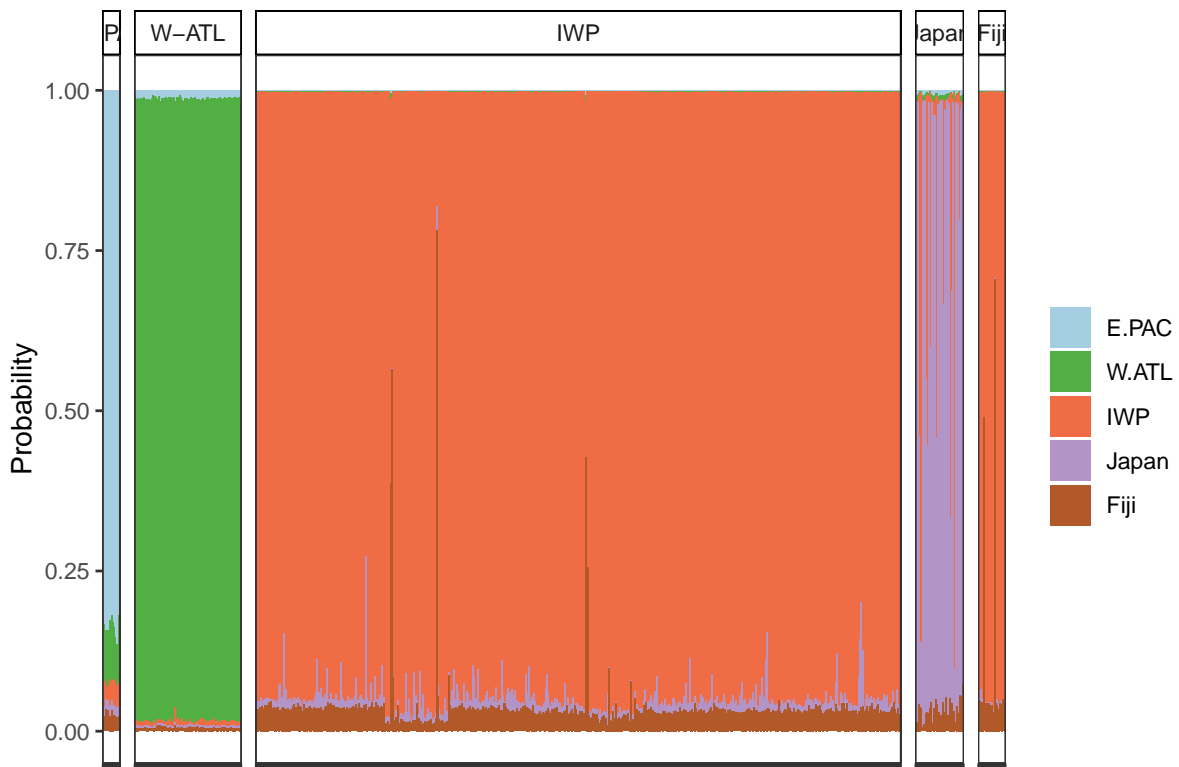

```
ggplot2::ggsave(memb.plot,
                 filename = "DARtcap_ALL_assignPOP_Kfold_membership_Regions.png",
                 width = 30, height = 15, units = "cm")

df <- data.frame(
  ind = as.character(memb.plot$data$Ind.ID)[
    as.character(memb.plot$data$fold_n) == "fold_10"],
  pop = as.character(memb.plot$data$origin.pop)[
    as.character(memb.plot$data$fold_n) == "fold_10"],
  memb = as.character(memb.plot$data$pred.pop)[
    as.character(memb.plot$data$fold_n) == "fold_10"], stringsAsFactors = FALSE)

summary(df$pop[df$pop != df$memb]) #still some difficulties to differentiate Japan and Fiji

##
## Correct assignment rates were estimated!!
## A total of 900 assignment tests for 5 pops.
## Results were also saved in a 'Rate_of_900_tests_5_pops.txt' file in the directory.
## Correct assignment rates were estimated!!
## A total of 30 assignment tests for 5 pops.
## Results were also saved in a 'Rate_of_30_tests_5_pops.txt' file in the directory. Fiji Japan
## 10 5
```

```
pop.levels1 <- c("Costa Rica" , "Brazil","Caribbean Sea", "Gulf of Mexico",
                "Western North Atlantic", "Sierra Leone", "South Africa",
                "Mozambique", "Reunion" , "Seychelles", "Arabian Sea", "Sri Lanka",
                "Thailand", "Indonesia", "Papua New Guinea" , "Australia",
                "Japan", "Fiji")
pop.levels2 <- c("E-PAC","W-ATL","E-ATL","IWP", "Japan","Fiji")
```

```

BS.dartcap.rubias2 <- BS.dartcap.rubias
# BS.dartcap.rubias2$indiv == BS.dartcap.gt@schemes$INDIVIDUALS

strata <- BS.dartcap.gt@schemes$Region
strata[strata %in% c("W-IO", "N-IO", "E-IO", "W-PAC", "E-IO/W-PAC")] <- "IWP"
BS.dartcap.rubias2$collection <- factor(BS.dartcap.gt@schemes$Site,
                                       levels = pop.levels1)
BS.dartcap.rubias2$repunit <- factor(strata, levels = pop.levels2)
BS.dartcap.rubias2 <- BS.dartcap.rubias2[order(BS.dartcap.rubias2$repunit,
                                              BS.dartcap.rubias2$collection),]

BS.dartcap.rubias2 %<>%
  dplyr::mutate_all(as.character)

BS_sims <- rubias::assess_reference_loo(reference = BS.dartcap.rubias2,
                                       gen_start_col = 5,
                                       reps = 5,
                                       mixsize = 200,
                                       return_indiv_posteriors = TRUE,
                                       resampling_unit = "gene_copies")

repu_pofzs <- BS_sims$indiv_posteriors %>%
  dplyr::filter(repunit == simulated_repunit) %>%
  dplyr::group_by(iter, indiv, simulated_collection, repunit) %>%
  dplyr::summarise(repu_PofZ = sum(PofZ)) %>%
  dplyr::ungroup() %>%
  dplyr::arrange(repunit, simulated_collection) %>%
  dplyr::mutate(simulated_collection = factor(simulated_collection,
                                             levels = unique(simulated_collection)))

num_simmed <- BS_sims$indiv_posteriors %>%
  dplyr::group_by(iter, indiv) %>%
  dplyr::slice(1) %>%
  dplyr::ungroup() %>%
  dplyr::count(simulated_collection)

num_simmed <- num_simmed[order(factor(num_simmed$simulated_collection,
                                       levels = pop.levels1)),]
repu_pofzs$repunit <- factor(repu_pofzs$repunit, levels = pop.levels2)
repu_pofzs$simulated_collection <- factor(repu_pofzs$simulated_collection,
                                          levels = pop.levels1)
repu_pofzs <- repu_pofzs[order(repu_pofzs$repunit, repu_pofzs$simulated_collection),]

plot <- ggplot2::ggplot(repu_pofzs, ggplot2::aes(x = simulated_collection,
                                                y = repu_PofZ)) +
  ggplot2::geom_boxplot(ggplot2::aes(colour = repunit)) +
  ggplot2::scale_color_manual(values = colours.6) +
  ggplot2::geom_text(data = num_simmed, mapping = aes(y = 1.025, label = n),
                    angle = 90, hjust = 0, vjust = 0.5, size = 3) +
  ggplot2::labs(subtitle = "",
               y = "Assignment success",
               x = "Collection site") +
  ggplot2::theme(axis.text.x = ggplot2::element_text(angle = 90, hjust = 1,
                                                       size = 9, vjust = 0.5)) +
  ggplot2::ylim(c(NA, 1.05))
print(plot)

```

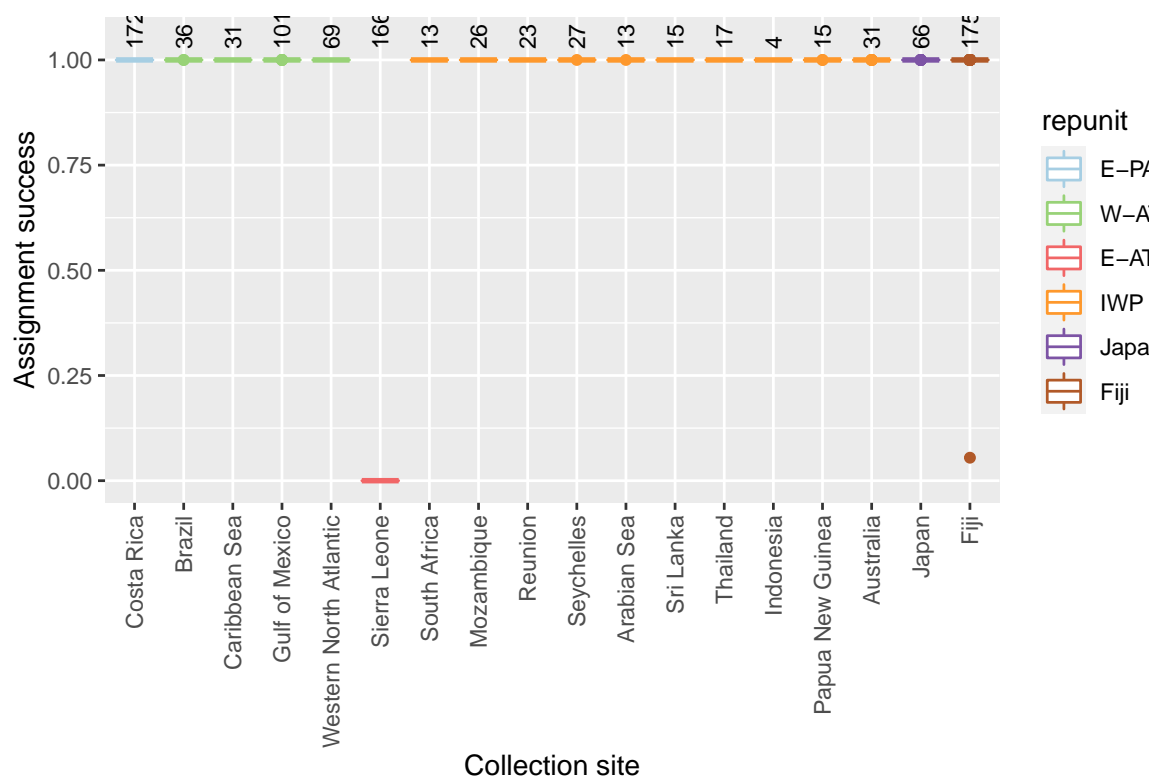

### 8.10.2.2 Rubias

```

ggplot2::ggsave(plot,
  filename = "DARtcap_ALL_Assign_Rubias_Regions_Assignment_success.png",
  width = 30, height = 15, units = "cm")

repunit_BS <- unique(BS.dartcap.rubias2$repunit)
BS_corr <- BS_sims$mixing_proportions %>%
  dplyr::mutate(repunit = ifelse(repunit %in% repunit_BS, repunit, "OTHER")) %>%
  dplyr::group_by(iter, repunit) %>%
  dplyr::summarise(true_repprop = sum(true_pi),
    reprop_posterior_mean = sum(post_mean_pi),
    repu_n = sum(n)) %>%
  dplyr::mutate(repu_n_prop = repu_n / sum(repu_n))

BS_corr$repunit <- factor(BS_corr$repunit, levels = pop.levels2)
plot <- ggplot2::ggplot(BS_corr, ggplot2::aes(x = repu_n_prop,
  y = reprop_posterior_mean,
  colour = repunit)) +

  ggplot2::geom_point(size = 5) +
  ggplot2::scale_color_manual(values = colours.6) +
  ggplot2::geom_abline(intercept = 0, slope = 1) +
  ggplot2::facet_wrap(~ repunit)
print(plot)

```



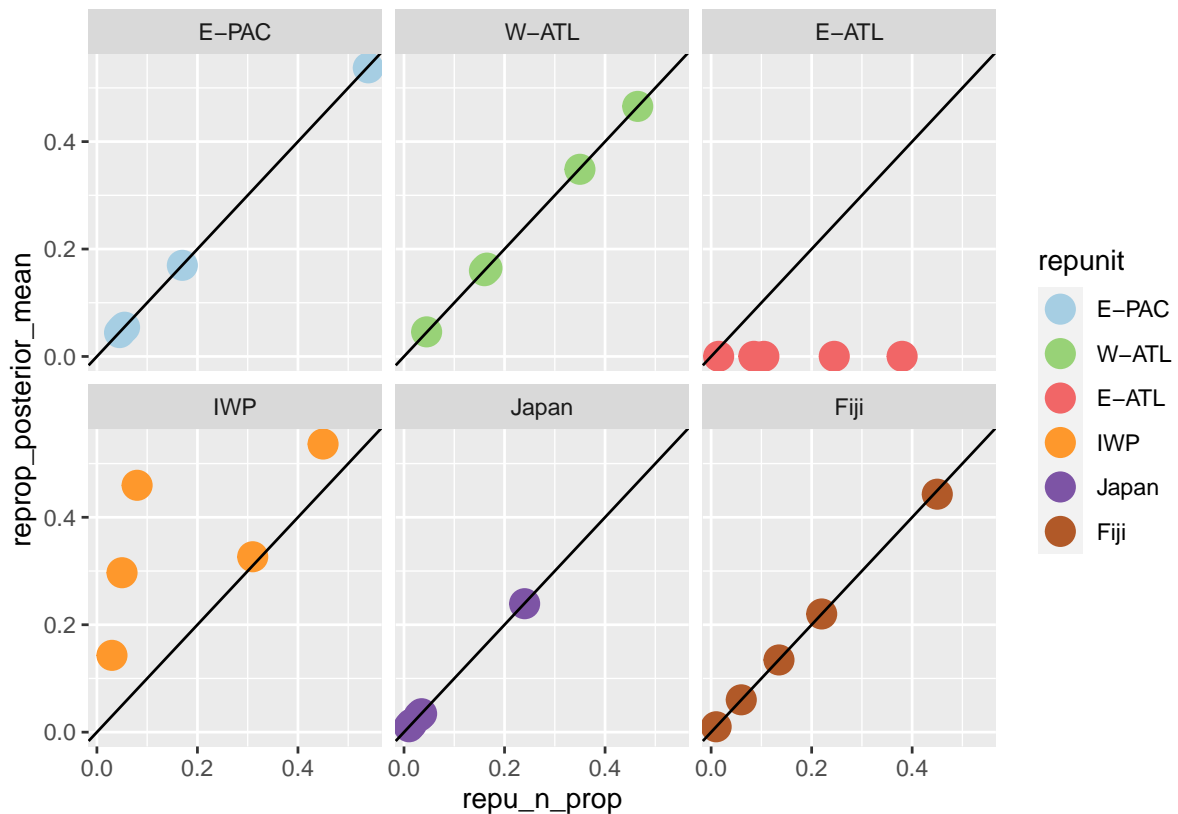

```
ggplot2::ggsave(plot, filename = "DARtcap_ALL_Assign_Rubias_Regions_correlation.png",
  width = 30, height = 15, units = "cm")
```

### 8.10.3 Test number of informative markers chosen by DAPC contribution

Using a 50% training dataset and validate the assignment success on a 50% hold-out dataset.

```
region.levels <- c("E-PAC", "W-ATL", "E-ATL", "IWP", "Japan", "Fiji")
BS.dartcap.g1 <- BS.dartcap.g1
region <- BS.dartcap.g1$other$ind.metrics$Region
region[region %in% c("W-IO", "N-IO", "E-IO", "E-IO/W-PAC", "W-PAC")] <- "IWP"
BS.dartcap.g1$pop <- factor(region, levels = region.levels)

subset.names <- c()
for (i in levels(BS.dartcap.g1$pop)) {
  g1 <- BS.dartcap.g1[BS.dartcap.g1$pop == i,]
  subset.names <- c(subset.names, sample(g1$ind.names,
    size = ceiling(adegenet::nInd(g1)/2)))
}
BS.dartcap.g12 <- BS.dartcap.g1[BS.dartcap.g1$ind.names %in% subset.names,]
BS.dartcap.g13 <- BS.dartcap.g1[!BS.dartcap.g1$ind.names %in%
  subset.names[subset.names != "CL-SIL001-F"],] #only 1 sample

dapc1 <- adegenet::dapc(BS.dartcap.g12, n.da = 5, n.pca = 76)
assign.success <- summary(dapc1)$assign.per.pop*100

plot.data <- data.frame(dapc1$ind.coord, pop = BS.dartcap.g12$pop)
ggplot(plot.data, aes(x = LD1, y = LD2, col = pop)) + ggplot2::geom_point() +
  ggplot2::scale_color_manual(values = adegenet::funky(6))
ggplot(plot.data, aes(x = LD3, y = LD5, col = pop)) + ggplot2::geom_point() +
  ggplot2::scale_color_manual(values = adegenet::funky(6))
```

```

ggplot(plot.data, aes(x = LD3, y = LD4, col = pop)) + ggplot2::geom_point() +
  ggplot2::scale_color_manual(values = adegenet::funky(6))
ggplot(plot.data, aes(x = LD4, y = LD5, col = pop)) + ggplot2::geom_point() +
  ggplot2::scale_color_manual(values = adegenet::funky(6))

marker.sample <- c(seq(5,100, by = 5), 125, 250, 375, 500)
loc.number <- list()
loc.names <- list()
assign.success <- data.frame(Pop = levels(BS.dartcap.gl2$pop))
for (i in 1:length(marker.sample)) {
  loc.number[[i]] <- c(
    rownames(dapc1$var.contr %>%
      as.data.frame() %>%
      dplyr::slice_max(n = marker.sample[i] / 5, with_ties = FALSE,
        order_by = LD1)
    ),
    rownames(dapc1$var.contr %>%
      as.data.frame() %>%
      dplyr::slice_max(n = marker.sample[i] / 5, with_ties = FALSE,
        order_by = LD2)
    ),
    rownames(dapc1$var.contr %>%
      as.data.frame() %>%
      dplyr::slice_max(n = marker.sample[i] / 5, with_ties = FALSE,
        order_by = LD3)
    ),
    rownames(dapc1$var.contr %>%
      as.data.frame() %>%
      dplyr::slice_max(n = marker.sample[i] / 5, with_ties = FALSE,
        order_by = LD4)
    ),
    rownames(dapc1$var.contr %>%
      as.data.frame() %>%
      dplyr::slice_max(n = marker.sample[i] / 5, with_ties = FALSE,
        order_by = LD5)
    )
  )
  loc.names[[i]] <- BS.dartcap.gl2$loc.names[as.integer(loc.number[[i]])]
  BS.dartcap.gl4 <- BS.dartcap.gl3[, as.integer(loc.number[[i]])]
  dapc2 <- adegenet::dapc(BS.dartcap.gl4, n.da = 5, n.pca = 76) # DAPC on hold-out data
  assign.success[[i + 1]] <- as.double(summary(dapc2)$assign.per.pop*100)
}
colnames(assign.success) <- c("pop", as.character(marker.sample))
save(assign.success, marker.sample, loc.number, loc.names, subset.names,
  file = "DARtcap_ALL_Informative_DAPC_markers.Rdata")

loc.names2 <- unlist(loc.names)
provenance.markers <- BS.dartcap.gl$other$loc.metrics[
  BS.dartcap.gl$other$loc.metrics$LOCUS %in% loc.names2,]
readr::write_tsv(provenance.markers,
  file = "500_DARtcap_markers_for_Bull_Shark_provenance.tsv")

load("DARtcap_ALL_Informative_DAPC_markers.Rdata")
mean.assign.success <- colMeans(assign.success[, -1])

region.levels <- c("E-PAC", "W-ATL", "E-ATL", "IWP", "Japan", "Fiji")

plot.data <- gather(assign.success, Markers, Assignment, 2:ncol(assign.success))
plot.data$Markers <- as.integer(plot.data$Markers)

```

```

plot.data$pop <- factor(plot.data$pop, levels = region.levels)
plot.data <- plot.data[order(as.integer(plot.data$Markers), plot.data$pop),]
assign.plot <- ggplot2::ggplot(plot.data,
                              aes(x = Markers,
                                   y = Assignment,
                                   col = pop,
                                   group = 1)) +
  ylab("Assignment success (%)") +
  xlab("Number of informative markers") +
  ggplot2::geom_point() +
  ggformula::geom_spline(aes(group = pop))

print(assign.plot)

```

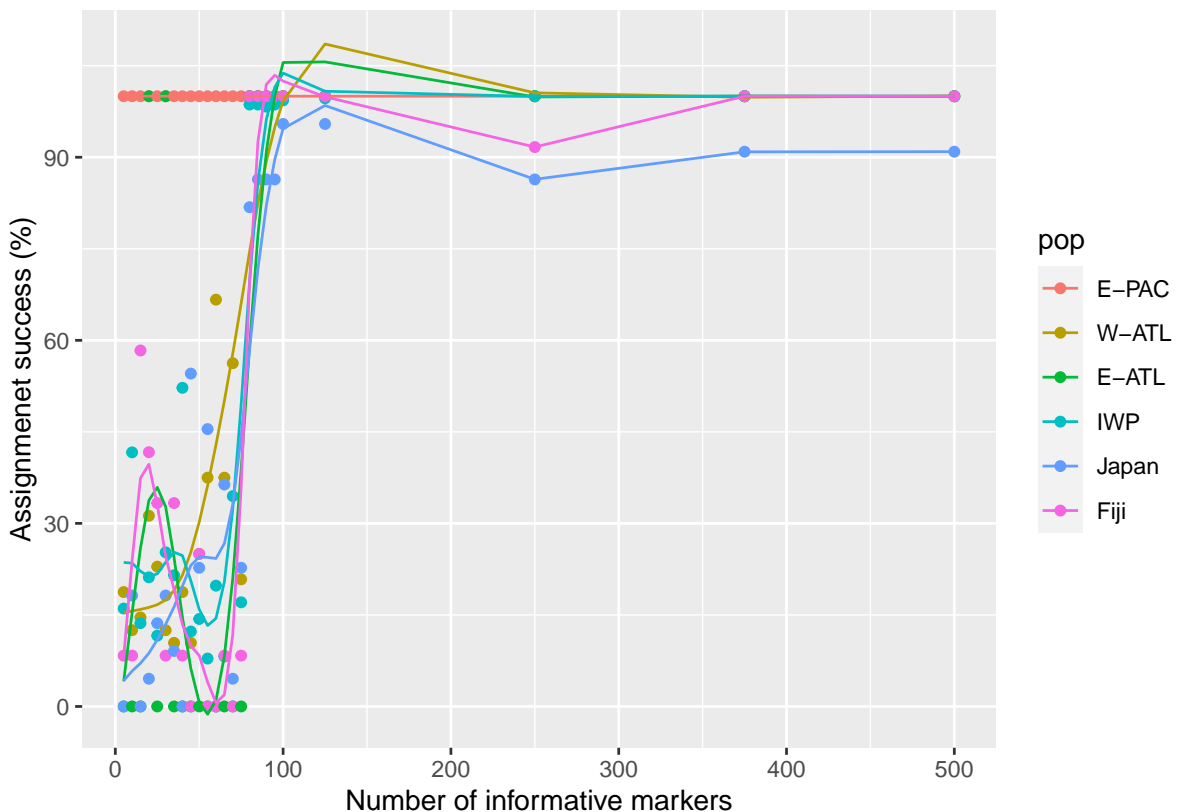

```

ggplot2::ggsave(assign.plot,
                 filename = "DARtcap_ALL_Assign_DAPC.png",
                 width = 30, height = 15, units = "cm")

```

Test rubias assignment success, based on 5-500 markers with highest loading contributions. Note that only samples from wild populations were use here (i.e. not the Okinawa aquarium, Japan).

```
load("DARtcap_ALL_Informative_DAPC_markers.Rdata")
```

```

pop.levels1 <- c("Costa Rica" , "Brazil","Caribbean Sea", "Gulf of Mexico",
                "Western North Atlantic", "Sierra Leone", "South Africa",
                "Mozambique", "Reunion" , "Seychelles", "Arabian Sea",
                "Sri Lanka", "Thailand", "Indonesia", "Papua New Guinea" ,
                "Australia", "Urauchi River, Japan", "Fiji")

```

```
pop.levels2 <- c("E-PAC","W-ATL","E-ATL","IWP", "Japan","Fiji")
```

```
colnames(BS.dartcap.rubias2)
```

```
BS.dartcap.rubias2 <- BS.dartcap.rubias
```

```

# BS.dartcap.rubias2$indiv == BS.dartcap.gt@schemes$INDIVIDUALS

strata <- BS.dartcap.gt@schemes$Region
strata[strata %in% c("W-IO", "N-IO", "E-IO", "W-PAC", "E-IO/W-PAC")] <- "IWP"
BS.dartcap.rubias2$collection <- factor(BS.dartcap.gt@schemes$Site,
                                       levels = pop.levels1)
BS.dartcap.rubias2$repunit <- factor(strata, levels = pop.levels2)
BS.dartcap.rubias2 <- BS.dartcap.rubias2[order(BS.dartcap.rubias2$repunit,
                                              BS.dartcap.rubias2$collection),]

BS.dartcap.rubias2 %<>%
  dplyr::mutate_all(as.character)

res <- data.frame(iter = integer(), indiv = integer(),
                 simulated_collection = factor(),
                 repunit = factor(), repu_PofZ = double(), Nmarkers = double())
for (i in 1:length(marker.sample)) {
  locus.rubias <- stringr::str_match(pattern = "__\\s*(.*?)\\s*__",
                                    string = colnames(BS.dartcap.rubias2))[,2]
  locus.rubias <- c("sample_type", "repunit", "collection", "indiv",
                  locus.rubias[-c(1:4)])
  BS.dartcap.rubias3 <- BS.dartcap.rubias2[,locus.rubias %in%
                                           c("sample_type", "repunit",
                                             "collection", "indiv",
                                             loc.names[[i])]]
  BS_sims <- rubias::assess_reference_loo(reference = BS.dartcap.rubias3,
                                         gen_start_col = 5,
                                         reps = 5,
                                         mixsize = 200,
                                         return_indiv_posteriors = TRUE)
  repu_pofzs <- BS_sims$indiv_posteriors %>%
    dplyr::filter(repunit == simulated_repunit) %>%
    dplyr::group_by(iter, indiv, simulated_collection, repunit) %>%
    dplyr::summarise(repu_PofZ = sum(PofZ)) %>%
    dplyr::ungroup() %>%
    dplyr::arrange(repunit, simulated_collection) %>%
    dplyr::mutate(simulated_collection = factor(simulated_collection,
                                              levels = unique(simulated_collection)))

  num_simmed <- BS_sims$indiv_posteriors %>%
    dplyr::group_by(iter, indiv) %>%
    dplyr::slice(1) %>%
    dplyr::ungroup() %>%
    dplyr::count(simulated_collection)

  num_simmed <- num_simmed[order(factor(num_simmed$simulated_collection,
                                       levels = pop.levels1)),]
  repu_pofzs$repunit <- factor(repu_pofzs$repunit, levels = pop.levels2)
  repu_pofzs$simulated_collection <- factor(repu_pofzs$simulated_collection,
                                           levels = pop.levels1)
  repu_pofzs <- repu_pofzs[order(repu_pofzs$repunit,
                                repu_pofzs$simulated_collection),]
  repu_pofzs$Nmarkers <- marker.sample[[i]]
  res <- rbind(res, repu_pofzs)
}
save(res, file = "DARtcap_ALL_Informative_DAPC_markers_rubias_assignment2.Rdata")

```

```

load("DARtcap_ALL_Informative_DAPC_markers_rubias_assignment2.Rdata")
plot <- ggplot2::ggplot(res, ggplot2::aes(x = as.factor(Nmarkers),
                                          y = repu_PofZ)) +
  ggplot2::geom_boxplot(ggplot2::aes(colour = repunit)) +
  ggplot2::scale_color_manual(values = colours.6) +
  ggplot2::facet_wrap(~simulated_collection) +
  ggplot2::labs(subtitle = "",
               y = "Assignment success",
               x = "Number of informative markers") +
  ggplot2::theme(axis.text.x = ggplot2::element_text(angle = 90,
                                                       hjust = 1, size = 9,
                                                       vjust = 0.5)) +

  ggplot2::ylim(c(NA, 1.05))
print(plot)

```

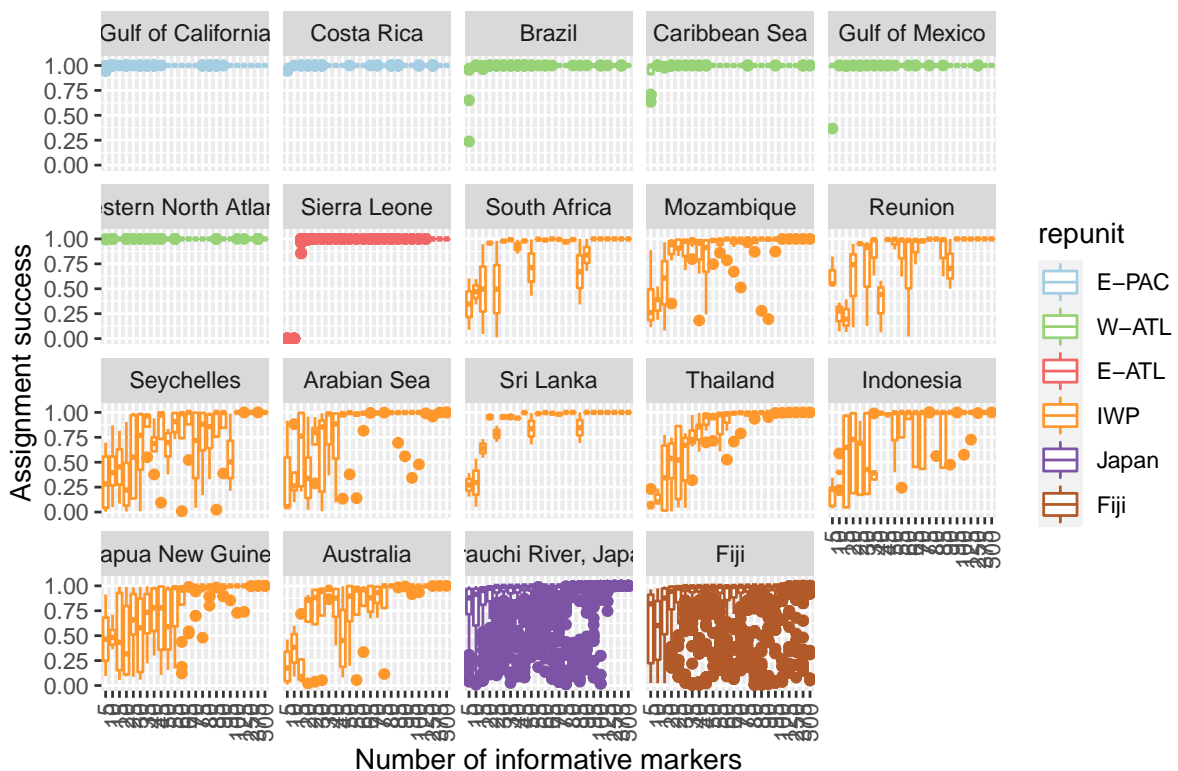

```

ggplot2::ggsave(plot,
  filename = "DARtcap_ALL_Informative_DAPC_markers_rubias_assignment2.png",
  width = 30, height = 15, units = "cm")

```

## 8.11 Sex-specific connectivity

### 8.11.1 Sex-linked markers

```

load("DARtcap_Raw_tidy.Rdata")
BS.dartcap.raw.tidy <- BSsnp$tidy.data
length(unique(BS.dartcap.raw.tidy$INDIVIDUALS)) #942
length(unique(BS.dartcap.raw.tidy$MARKERS)) #19549

load("Sex-linked_marker_DARtcap.Rdata")
load("Sex_results.Rdata")
x.markers <- unique(c(bull_shark$sexy.summary$CLONE_ID[

```

```

bull_shark$sexy.summary$MARKER_TYPE == "Homogametic_sex-marker"],
      SLM$sexy.summary$CLONE_ID[
        SLM$sexy.summary$MARKER_TYPE == "Homogametic_sex-marker"]])
y.markers <- unique(c(bull_shark$sexy.summary$CLONE_ID[
  bull_shark$sexy.summary$MARKER_TYPE == "Heterogametic_sex-marker"],
  SLM$sexy.summary$CLONE_ID[
    SLM$sexy.summary$MARKER_TYPE == "Heterogametic_sex-marker"]])

sum(unique(BS.dartcap.raw.tidy$LOCUS) %in% x.markers) ##121
BS.dartcap.x.tidy <- BS.dartcap.raw.tidy[BS.dartcap.raw.tidy$LOCUS %in% x.markers, ]

sum(unique(BS.dartcap.raw.tidy$LOCUS) %in% y.markers) ##0

Convert <- radiator::genomic_converter(BS.dartcap.x.tidy,
                                       output = c("genlight","gtypes"))
BS.dartcap.gl.x <- Convert$genlight
BS.dartcap.gt.x <- Convert$gtypes

pop.levels <- c("Costa Rica", "Brazil", "Caribbean Sea", "Gulf of Mexico",
  "Western North Atlantic", "Sierra Leone", "South Africa",
  "Mozambique", "Reunion" , "Seychelles", "Arabian Sea",
  "Sri Lanka", "Thailand", "Indonesia", "Papua New Guinea" ,
  "Australia", "Japan", "Fiji")
BS.dartcap.gl.x$pop <- factor(BS.dartcap.gl.x$other$ind.metrics$Site,
  levels = pop.levels)
BS.dartcap.gl.x <- BS.dartcap.gl.x[order(BS.dartcap.gl.x$pop,
  BS.dartcap.gl.x$ind.names),]

pop.levels <- c("Costa_Rica", "Brazil", "Caribbean_Sea", "Gulf_of_Mexico",
  "Western_North_Atlantic", "Sierra_Leone", "South_Africa",
  "Mozambique", "Reunion" , "Seychelles", "Arabian_Sea", "Sri_Lanka",
  "Thailand", "Indonesia", "Papua_New_Guinea" , "Australia",
  "Japan", "Fiji")
BS.dartcap.gt.x@data$stratum <- factor(BS.dartcap.gt.x@data$stratum,
  levels = pop.levels)
BS.dartcap.gt.x <- BS.dartcap.gt.x[order(BS.dartcap.gt.x@data$id),]
BS.dartcap.gt.x@data <- BS.dartcap.gt.x@data[order(BS.dartcap.gt.x@data$id),]
BS.dartcap.gt.x@schemes <- BS.dartcap.gt.x@schemes[order(BS.dartcap.gt.x@schemes$id),]

save(BS.dartcap.x.tidy, BS.dartcap.gl.x,BS.dartcap.gt.x,
  file = "DARtcap_X_SLM.Rdata")

load("Sex-linked_marker_DARtcap.Rdata")
load("Sex_results.Rdata")
sex.markers <- unique(c(bull_shark$sexy.summary$CLONE_ID, SLM$sexy.summary$CLONE_ID))

load("DARtcap_X_SLM.Rdata")
sum(BS.dartcap.gl.x$other$loc.metrics$CloneID %in% sex.markers) #148

pop.levels <- c("Costa Rica" , "Brazil", "Caribbean Sea","Gulf of Mexico",
  "Western North Atlantic", "Sierra Leone", "South Africa",
  "Mozambique", "Reunion" , "Seychelles", "Arabian Sea",
  "Sri Lanka", "Thailand", "Indonesia", "Papua New Guinea" ,
  "Australia", "Japan", "Fiji")
BS.dartcap.gl.x$pop <- factor(BS.dartcap.gl.x$other$ind.metrics$Site,
  levels = pop.levels)

```

```

gl.x.F.filtered <- BS.dartcap.gl.x[
  BS.dartcap.gl.x@other$ind.metrics$COMBINED_SEX == "F" &
  BS.dartcap.gl.x$ind.names %in% BS.dartcap.gl$ind.names,]
gl.x.M.filtered <- BS.dartcap.gl.x[
  BS.dartcap.gl.x@other$ind.metrics$COMBINED_SEX == "M" &
  BS.dartcap.gl.x$ind.names %in% BS.dartcap.gl$ind.names,]

gt.x.F.filtered <- BS.dartcap.gt.x[
  BS.dartcap.gt.x@schemes$COMBINED_SEX == "F" &
  getIndNames(BS.dartcap.gt.x) %in% getIndNames(BS.dartcap.gt),,drop = TRUE]
gt.x.M.filtered <- BS.dartcap.gt.x[
  BS.dartcap.gt.x@schemes$COMBINED_SEX == "M" &
  BS.dartcap.gt.x@schemes$id %in% BS.dartcap.gt@schemes$id,,drop = TRUE]
gt.x.F.filtered@schemes <- BS.dartcap.gt.x@schemes[
  BS.dartcap.gt.x@schemes$COMBINED_SEX == "F" &
  BS.dartcap.gt.x@schemes$id %in% BS.dartcap.gt@schemes$id,]
gt.x.M.filtered@schemes <- BS.dartcap.gt.x@schemes[
  BS.dartcap.gt.x@schemes$COMBINED_SEX == "M" &
  BS.dartcap.gt.x@schemes$id %in% BS.dartcap.gt@schemes$id,]

adegenet::nInd(gl.x.F.filtered) #353
summary(gl.x.F.filtered$pop)
adegenet::nInd(gl.x.M.filtered) #338
summary(gl.x.M.filtered$pop)
adegenet::nLoc(gl.x.F.filtered) #148
sum(as.data.frame(gl.x.M.filtered) == 1, na.rm = TRUE) #351
sum(as.data.frame(gl.x.F.filtered) == 1, na.rm = TRUE) #2156

```

```

## [1] 148
## [1] 353
##           Costa Rica           Gulf of Mexico Western North Atlantic
##                9                18                6
##           Sierra Leone           South Africa           Mozambique
##                1                9                5
##           Reunion           Seychelles           Arabian Sea
##                13                28                9
##           Sri Lanka           Thailand           Indonesia
##                7                3                1
##           Papua New Guinea           Australia           Japan
##                4                193                25
##           Fiji
##                22
## [1] 338
##           Costa Rica           Caribbean Sea           Gulf of Mexico
##                7                2                19
## Western North Atlantic           South Africa           Mozambique
##                2                12                6
##           Reunion           Seychelles           Arabian Sea
##                15                8                6
##           Sri Lanka           Thailand           Indonesia
##                5                2                3
##           Papua New Guinea           Australia           Japan
##                4                225                19
##           Fiji
##                3
## [1] 148
## [1] 351

```



```
## [1] 2156
```

```
pop.levels <- c("Costa Rica" , "Brazil", "Caribbean Sea", "Gulf of Mexico",
               "Western North Atlantic", "South Africa", "Mozambique",
               "Reunion" , "Seychelles", "Arabian Sea", "Sri Lanka", "Thailand",
               "Indonesia", "Papua New Guinea" , "Australia", "Japan", "Fiji")

gl <- BS.dartcap.gl
gl <- gl[gl$pop != "Sierra Leone"] #only 1 sample
gl$pop <- factor(gl$other$ind.metrics$Site, levels = pop.levels)
gl <- gl[order(gl$pop,gl$ind.names)]

gl2gpop(gl, filename = "BS_dartcap_all_Sites_genepop.txt")
bastat <- diveRsity::basicStats(infile = "BS_dartcap_all_Sites_genepop.txt",
                               outfile = "BS_dartcap_all_Sites_BasicStat_output.txt",
                               fis_ci = TRUE, ar_ci = TRUE, fis_boots = 1000,
                               ar_boots = 1000, mc_reps = 1000,
                               rarefaction = FALSE, ar_alpha = 0.05,
                               fis_alpha = 0.05)

length(bastat$main_tab) #17
gendiv <- data.frame(
  "Costa Rica" = bastat$main_tab[[1]]$overall,
  "Brazil" = bastat$main_tab[[2]]$overall,
  "Caribbean Sea" = bastat$main_tab[[3]]$overall,
  "Gulf of Mexico" = bastat$main_tab[[4]]$overall,
  "Western North Atlantic" = bastat$main_tab[[5]]$overall,
  "South Africa" = bastat$main_tab[[6]]$overall,
  "Mozambique" = bastat$main_tab[[7]]$overall,
  "Reunion" = bastat$main_tab[[8]]$overall,
  "Seychelles" = bastat$main_tab[[9]]$overall,
  "Arabian Sea" = bastat$main_tab[[10]]$overall,
  "Sri Lanka" = bastat$main_tab[[11]]$overall,
  "Thailand" = bastat$main_tab[[12]]$overall,
  "Indonesia" = bastat$main_tab[[13]]$overall,
  "Papua New Guinea" = bastat$main_tab[[14]]$overall,
  "Australia" = bastat$main_tab[[15]]$overall,
  "Japan" = bastat$main_tab[[16]]$overall,
  "Fiji" = bastat$main_tab[[17]]$overall,
  check.names = FALSE)
row.names(gendiv) <- rownames(bastat$main_tab[[1]])

df <- as.data.frame(gl)
df[df == "0"] <- "11"
df[df == "1"] <- "12"
df[df == "2"] <- "22"
gen.gi <- adegenet::df2genind(df, ploidy = 2, ncode = 2, pop = gl$pop)
ris_basic <- hierfstat::basic.stats(gen.gi)
fis.hierfstat <- apply(ris_basic$Fis, 2, mean, na.rm=T)
fis.CI <- hierfstat::boot.ppfis(gen.gi, nboot = 1000, quant = c(0.025,0.975),
                              diploid = TRUE, dig = 4)
df <- data.frame(fis.hierfstat, fis.CI.low = fis.CI$fis.ci[,1],
                fis.CI.high = fis.CI$fis.ci[,2])
df <- as.data.frame(t(df))
gendiv <- rbind(gendiv, df)
readr::write_tsv(gendiv, path = "DArTcap_ALL_Sites_gendiv.txt")
save(gendiv, file = "DArTcap_ALL_Sites_gendiv.Rdata")
```



```

gl <- gl.x.F.filtered
gl <- gl[!gl$pop %in% c("Sierra Leone", "Indonesia")] #only 1 sample
gl <- gl[order(gl$pop,gl$ind.names)]

gl2gpop(gl, filename = "BS_dartcap_all_X_F_genepop.txt")
bastat <-diveRsity::basicStats(infile = "BS_dartcap_all_X_F_genepop.txt",
                              outfile = "BS_dartcap_all_X_F_BasicStat_output.txt",
                              fis_ci = TRUE,ar_ci = TRUE, fis_boots = 1000,
                              ar_boots = 1000,mc_reps = 1000,
                              rarefaction = FALSE, ar_alpha = 0.05,
                              fis_alpha = 0.05)

length(bastat$main_tab)#14
gendiv.x.F <- data.frame(
  "Costa Rica" = bastat$main_tab[[1]]$overall,
  "Gulf of Mexico" = bastat$main_tab[[2]]$overall,
  "Western North Atlantic" = bastat$main_tab[[3]]$overall,
  "South Africa" = bastat$main_tab[[4]]$overall,
  "Mozambique" = bastat$main_tab[[5]]$overall,
  "Reunion" = bastat$main_tab[[6]]$overall,
  "Seychelles" = bastat$main_tab[[7]]$overall,
  "Arabian Sea" = bastat$main_tab[[8]]$overall,
  "Sri Lanka" = bastat$main_tab[[9]]$overall,
  "Thailand" = bastat$main_tab[[10]]$overall,
  "Papua New Guinea" = bastat$main_tab[[11]]$overall,
  "Australia" = bastat$main_tab[[12]]$overall,
  "Japan" = bastat$main_tab[[13]]$overall,
  "Fiji" = bastat$main_tab[[14]]$overall,
  check.names = FALSE)
row.names(gendiv.x.F) <- rownames(bastat$main_tab[[1]])

df <- as.data.frame(gl)
df[df == "0"] <- "11"
df[df == "1"] <- "12"
df[df == "2"] <- "22"
gen.gi <- adegenet::df2genind(df, ploidy = 2,ncode = 2, pop = gl$pop)
ris_basic <- hierfstat::basic.stats(gen.gi)
fis.hierfstat <- apply(ris_basic$Fis, 2, mean, na.rm=T)
fis.CI <- hierfstat::boot.ppfis(gen.gi, nboot = 1000, quant = c(0.025,0.975),
                              diploid = TRUE,dig = 4)
df <- data.frame(fis.hierfstat,fis.CI.low = fis.CI$fis.ci[,1],
                fis.CI.high = fis.CI$fis.ci[,2])
df <- as.data.frame(t(df))
gendiv.x.F <- rbind(gendiv.x.F, df)

readr::write_tsv(gendiv.x.F, path = "DARtcap_ALL_gendiv_X_F.txt")
save(gendiv.x.F, file = "DARtcap_ALL_gendiv_X_perSites.Rdata")

gl <- gl.x.M.filtered
gl <- gl[order(gl$pop,gl$ind.names)]

gl2gpop(gl, filename = "BS_dartcap_all_X_M_genepop.txt")
bastat <-diveRsity::basicStats(infile = "BS_dartcap_all_X_M_genepop.txt",
                              outfile = "BS_dartcap_all_X_M_BasicStat_output.txt",
                              fis_ci = TRUE,ar_ci = TRUE, fis_boots = 1000,
                              ar_boots = 1000,mc_reps = 1000,

```

```

rarefaction = FALSE, ar_alpha = 0.05,
fis_alpha = 0.05)

length(bastat$main_tab)#16
gendiv.x.M <- data.frame(
  "Costa Rica" = bastat$main_tab[[1]]$overall,
  "Caribbean Sea" = bastat$main_tab[[2]]$overall,
  "Gulf of Mexico" = bastat$main_tab[[3]]$overall,
  "Western North Atlantic" = bastat$main_tab[[4]]$overall,
  "South Africa" = bastat$main_tab[[5]]$overall,
  "Mozambique" = bastat$main_tab[[6]]$overall,
  "Reunion" = bastat$main_tab[[7]]$overall,
  "Seychelles" = bastat$main_tab[[8]]$overall,
  "Arabian Sea" = bastat$main_tab[[9]]$overall,
  "Sri Lanka" = bastat$main_tab[[10]]$overall,
  "Thailand" = bastat$main_tab[[11]]$overall,
  "Indonesia" = bastat$main_tab[[12]]$overall,
  "Papua New Guinea" = bastat$main_tab[[13]]$overall,
  "Australia" = bastat$main_tab[[14]]$overall,
  "Japan" = bastat$main_tab[[15]]$overall,
  "Fiji" = bastat$main_tab[[16]]$overall,
  check.names = FALSE)
row.names(gendiv.x.M) <- rownames(bastat$main_tab[[1]])

df <- as.data.frame(g1)
df[df == "0"] <- "11"
df[df == "1"] <- "12"
df[df == "2"] <- "22"
gen.gi <- adegenet::df2genind(df, ploidy = 2, ncode = 2, pop = g1$pop)
ris_basic <- hierfstat::basic.stats(gen.gi)
fis.hierfstat <- apply(ris_basic$Fis, 2, mean, na.rm=T)
fis.CI <- hierfstat::boot.ppfis(gen.gi, nboot = 1000, quant = c(0.025,0.975),
  diploid = TRUE,dig = 4)
df <- data.frame(fis.hierfstat,fis.CI.low = fis.CI$fis.ci[,1],
  fis.CI.high = fis.CI$fis.ci[,2])
df <- as.data.frame(t(df))
gendiv.x.M <- rbind(gendiv.x.M, df)

readr::write_tsv(gendiv.x.M, path = "DAR_Tcap_ALL_gendiv_X_M.txt")
save(gendiv.x.F,gendiv.x.M,
  file = "DAR_Tcap_ALL_gendiv_X_perSites.Rdata")

load("DAR_Tcap_ALL_Sites_gendiv.Rdata")
load("DAR_Tcap_ALL_gendiv_X_perSites.Rdata")
knitr::kable(gendiv, digits = 4,
  caption = "Genetic diversity for all loci") %>%
  kableExtra::kable_styling(full_width = FALSE,font_size = 5,
    latex_options = c("hold_position")) %>%
  kableExtra::landscape()
knitr::kable(gendiv.x.F, digits = 4,
  caption = "Genetic diversity for all X-linked loci: Only females") %>%
  kableExtra::kable_styling(full_width = FALSE,font_size = 5,
    latex_options = c("hold_position")) %>%
  kableExtra::landscape()
knitr::kable(gendiv.x.M, digits = 4,
  caption = "Genetic diversity for all X-linked loci: Only males") %>%
  kableExtra::kable_styling(full_width = FALSE,font_size = 5,

```

```
kableExtra::landscape() latex_options = c("hold_position")) %>%
```

#### 8.11.1.1 Genetic diversity

Table 22: Genetic diversity for all loci

|               | Costa.Rica | Brazil  | Caribbean.Sea | Gulf.of.Mexico | Western.North.Atlantic | South.Africa | Mozambique | Reunion | Seychelles | Arabian.Sea | Sri.Lanka | Thailand | Indonesia | Papua.New.Guinea | Australia |
|---------------|------------|---------|---------------|----------------|------------------------|--------------|------------|---------|------------|-------------|-----------|----------|-----------|------------------|-----------|
| ar            | 1.0610     | 1.0950  | 1.0640        | 1.0860         | 1.0850                 | 1.1120       | 1.0870     | 1.1090  | 1.1120     | 1.1140      | 1.1110    | 1.1100   | 1.0960    | 1.1050           | 1.1160    |
| size          | 15.6540    | 49.0870 | 1.9750        | 36.0400        | 7.8830                 | 21.7470      | 10.2580    | 27.3810 | 35.4700    | 14.8430     | 11.8850   | 4.9650   | 3.9590    | 8.9060           | 438.3460  |
| obs_het       | 0.0360     | 0.0520  | 0.0490        | 0.0480         | 0.0500                 | 0.0600       | 0.0560     | 0.0590  | 0.0600     | 0.0620      | 0.0610    | 0.0660   | 0.0610    | 0.0590           | 0.0610    |
| exp_het       | 0.0390     | 0.0560  | 0.0380        | 0.0530         | 0.0500                 | 0.0620       | 0.0600     | 0.0620  | 0.0620     | 0.0630      | 0.0610    | 0.0590   | 0.0540    | 0.0580           | 0.0640    |
| uexp_het      | 0.0410     | 0.0570  | 0.0510        | 0.0530         | 0.0540                 | 0.0630       | 0.0640     | 0.0630  | 0.0630     | 0.0650      | 0.0640    | 0.0660   | 0.0610    | 0.0620           | 0.0640    |
| fis           | 0.0450     | 0.0480  | -0.2930       | 0.0500         | -0.0250                | 0.0240       | 0.0520     | 0.0400  | 0.0260     | 0.0040      | -0.0050   | -0.1080  | -0.1360   | -0.0270          | 0.0430    |
| hwe_glb       | 1.0000     | 1.0000  | 1.0000        | 1.0000         | 1.0000                 | 1.0000       | 1.0000     | 1.0000  | 1.0000     | 1.0000      | 1.0000    | 1.0000   | 1.0000    | 1.0000           | 1.0000    |
| hwe_hom       | 1.0000     | 1.0000  | 1.0000        | 1.0000         | 1.0000                 | 1.0000       | 1.0000     | 1.0000  | 1.0000     | 1.0000      | 1.0000    | 1.0000   | 1.0000    | 1.0000           | 1.0000    |
| hwe_het       | 1.0000     | 1.0000  | 1.0000        | 1.0000         | 1.0000                 | 1.0000       | 1.0000     | 1.0000  | 1.0000     | 1.0000      | 1.0000    | 1.0000   | 1.0000    | 1.0000           | 1.0000    |
| fis_lo        | -0.0090    | 0.0330  | -1.0000       | 0.0310         | -0.1450                | -0.0090      | -0.0350    | 0.0100  | 0.0020     | -0.0480     | -0.0770   | -0.3680  | -0.5470   | -0.1260          | 0.0370    |
| fis_hi        | 0.0440     | 0.0520  | -0.2930       | 0.0530         | -0.0340                | 0.0180       | 0.0450     | 0.0370  | 0.0250     | -0.0030     | -0.0150   | -0.1080  | -0.1360   | -0.0370          | 0.0430    |
| ar_lo         | 1.0130     | 1.0850  | 1.0330        | 1.0360         | 1.0290                 | 1.0510       | 0.9460     | 1.0460  | 1.0600     | 1.0480      | 1.0490    | 1.0520   | 1.0470    | 1.0430           | 1.1050    |
| ar_hi         | 1.0710     | 1.1070  | 1.0920        | 1.0990         | 1.1020                 | 1.1220       | 1.1190     | 1.1210  | 1.1210     | 1.1280      | 1.1280    | 1.1290   | 1.1190    | 1.1180           | 1.1270    |
| fis.hierfstat | 0.0750     | 0.0576  | -0.0481       | 0.0638         | 0.0369                 | 0.0465       | 0.0959     | 0.0572  | 0.0398     | 0.0370      | 0.0356    | -0.0069  | -0.0098   | 0.0285           | 0.0440    |
| fis.CI.low    | 0.0785     | 0.0687  | -0.0302       | 0.0736         | 0.0321                 | 0.0454       | 0.1015     | 0.0530  | 0.0328     | 0.0261      | 0.0130    | -0.0302  | -0.0282   | 0.0165           | 0.0387    |
| fis.CI.high   | 0.1389     | 0.1058  | 0.1227        | 0.1164         | 0.0998                 | 0.0787       | 0.1564     | 0.0888  | 0.0611     | 0.0675      | 0.0610    | 0.0374   | 0.0545    | 0.0702           | 0.0544    |

Table 23: Genetic diversity for all X-linked loci: Only females

|               | Costa.Rica | Gulf.of.Mexico | Western.North.Atlantic | South.Africa | Mozambique | Reunion | Seychelles | Arabian.Sea | Sri.Lanka | Thailand | Papua.New.Guinea | Australia | Japan   | Fiji    |
|---------------|------------|----------------|------------------------|--------------|------------|---------|------------|-------------|-----------|----------|------------------|-----------|---------|---------|
| ar            | 1.0190     | 1.0530         | 1.0470                 | 1.0920       | 1.0920     | 1.0980  | 1.0980     | 1.0990      | 1.0910    | 1.0990   | 1.0780           | 1.1000    | 1.0920  | 1.0850  |
| size          | 8.8450     | 17.7360        | 5.9120                 | 8.9730       | 4.9590     | 12.8650 | 27.7160    | 8.8920      | 6.9320    | 2.9930   | 3.9860           | 191.2500  | 24.7090 | 21.3650 |
| obs_het       | 0.0110     | 0.0220         | 0.0250                 | 0.0410       | 0.0490     | 0.0470  | 0.0460     | 0.0420      | 0.0400    | 0.0560   | 0.0470           | 0.0440    | 0.0440  | 0.0420  |
| exp_het       | 0.0180     | 0.0220         | 0.0210                 | 0.0410       | 0.0390     | 0.0420  | 0.0450     | 0.0450      | 0.0410    | 0.0460   | 0.0340           | 0.0450    | 0.0420  | 0.0390  |
| uexp_het      | 0.0120     | 0.0220         | 0.0230                 | 0.0440       | 0.0440     | 0.0440  | 0.0460     | 0.0480      | 0.0450    | 0.0550   | 0.0390           | 0.0450    | 0.0430  | 0.0400  |
| fis           | -0.0400    | -0.0280        | -0.1550                | -0.0050      | -0.2070    | -0.0870 | -0.0200    | -0.0120     | -0.0170   | -0.2090  | -0.3050          | 0.0110    | -0.0100 | -0.0470 |
| hwe_glb       | 1.0000     | 1.0000         | 1.0000                 | 1.0000       | 1.0000     | 1.0000  | 1.0000     | 1.0000      | 1.0000    | 1.0000   | 1.0000           | 1.0000    | 1.0000  | 1.0000  |
| hwe_hom       | 1.0000     | 1.0000         | 1.0000                 | 1.0000       | 1.0000     | 1.0000  | 1.0000     | 1.0000      | 1.0000    | 1.0000   | 1.0000           | 1.0000    | 1.0000  | 1.0000  |
| hwe_het       | 1.0000     | 1.0000         | 1.0000                 | 1.0000       | 1.0000     | 1.0000  | 1.0000     | 1.0000      | 1.0000    | 1.0000   | 1.0000           | 1.0000    | 1.0000  | 1.0000  |
| fis_lo        | -0.3150    | -0.0970        | -0.5200                | -0.2080      | -0.5220    | -0.2140 | -0.0810    | -0.1710     | -0.3110   | -1.0000  | -0.7940          | -0.0030   | -0.0820 | -0.1150 |
| fis_hi        | 0.1040     | -0.0040        | -0.0930                | 0.0640       | -0.1650    | -0.0430 | 0.0130     | 0.0650      | 0.1780    | -0.1810  | -0.2820          | 0.0250    | 0.0130  | -0.0200 |
| ar_lo         | 1.0000     | 1.0200         | 1.0200                 | 1.0470       | 1.0470     | 1.0610  | 1.0610     | 1.0470      | 1.0470    | 1.0340   | 1.0470           | 1.0680    | 1.0540  | 1.0410  |
| ar_hi         | 1.0470     | 1.0880         | 1.0810                 | 1.1350       | 1.1150     | 1.1280  | 1.1280     | 1.1420      | 1.1220    | 1.1220   | 1.1010           | 1.1420    | 1.1220  | 1.1280  |
| fis.hierfstat | 0.0188     | 0.0004         | -0.0666                | 0.0478       | -0.1052    | -0.0476 | -0.0022    | 0.0447      | 0.0573    | -0.0648  | -0.1848          | 0.0137    | 0.0087  | -0.0229 |
| fis.CI.low    | -0.0323    | -0.1037        | -0.2234                | -0.1210      | -0.3056    | -0.1582 | -0.1452    | -0.0241     | -0.0408   | -0.3333  | -0.5000          | -0.0411   | -0.1585 | -0.1671 |
| fis.CI.high   | 0.1157     | 0.1489         | 0.0141                 | 0.2515       | 0.0690     | 0.0071  | 0.1465     | 0.2382      | 0.2372    | 0.2882   | -0.0485          | 0.1247    | 0.1417  | 0.0873  |

Table 24: Genetic diversity for all X-linked loci: Only males

|               | Costa.Rica | Caribbean.Sea | Gulf.of.Mexico | Western.North.Atlantic | South.Africa | Mozambique | Reunion | Seychelles | Arabian.Sea | Sri.Lanka | Thailand | Indonesia | Papua.New.Guinea | Australia | Japan   |
|---------------|------------|---------------|----------------|------------------------|--------------|------------|---------|------------|-------------|-----------|----------|-----------|------------------|-----------|---------|
| ar            | 0.994      | 0.999         | 1.0130         | 1.0440                 | 1.0370       | 0.9950     | 1.0280  | 1.0360     | 1.0460      | 1.0130    | 1.002    | 1.0230    | 1.0330           | 1.0380    | 1.0180  |
| size          | 6.696      | 1.932         | 18.3450        | 1.9530                 | 11.6350      | 5.5340     | 14.5680 | 7.7500     | 5.8510      | 4.7970    | 1.946    | 2.9530    | 3.9460           | 218.2910  | 18.3110 |
| obs_het       | 0.001      | 0.003         | 0.0070         | 0.0340                 | 0.0100       | 0.0050     | 0.0030  | 0.0090     | 0.0190      | 0.0010    | 0.003    | 0.0050    | 0.0120           | 0.0080    | 0.0030  |
| exp_het       | 0.009      | 0.013         | 0.0170         | 0.0490                 | 0.0390       | 0.0450     | 0.0330  | 0.0400     | 0.0380      | 0.0290    | 0.023    | 0.0250    | 0.0280           | 0.0410    | 0.0270  |
| uexp_het      | 0.010      | 0.017         | 0.0180         | 0.0470                 | 0.0410       | 0.0420     | 0.0340  | 0.0430     | 0.0420      | 0.0320    | 0.021    | 0.0300    | 0.0320           | 0.0410    | 0.0280  |
| fis           | 0.731      | 0.667         | 0.2970         | -0.0260                | 0.4100       | 0.7590     | 0.7650  | 0.6730     | 0.4300      | 0.9070    | 0.733    | 0.7330    | 0.4700           | 0.3660    | 0.8670  |
| hwe_glb       | 1.000      | 1.000         | 1.0000         | 1.0000                 | 1.0000       | 1.0000     | 1.0000  | 1.0000     | 1.0000      | 1.0000    | 1.000    | 1.0000    | 1.0000           | 0.0000    | 1.0000  |
| hwe_hom       | 1.000      | 1.000         | 1.0000         | 1.0000                 | 1.0000       | 1.0000     | 1.0000  | 1.0000     | 1.0000      | 1.0000    | 1.000    | 1.0000    | 1.0000           | 1.0000    | 1.0000  |
| hwe_het       | 1.000      | 1.000         | 1.0000         | 1.0000                 | 1.0000       | 1.0000     | 1.0000  | 1.0000     | 1.0000      | 1.0000    | 1.000    | 1.0000    | 1.0000           | 0.0000    | 1.0000  |
| fis_lo        | 0.576      | -1.000        | 0.1470         | -1.0000                | 0.3640       | 0.5660     | 0.6990  | 0.5300     | -0.0180     | 0.7620    | -1.000   | -1.0000   | -0.4290          | 0.3680    | 0.6780  |
| fis_hi        | 1.000      | 0.667         | 0.7460         | -0.0260                | 0.6110       | 1.0000     | 0.9090  | 0.8110     | 0.6300      | 1.0000    | 0.733    | 1.0000    | 1.0000           | 0.4670    | 0.9740  |
| ar_lo         | 0.953      | 0.959         | 0.9530         | 0.9800                 | 0.9660       | 0.9110     | 0.9730  | 0.9590     | 0.9800      | 0.9390    | 0.973    | 0.9860    | 0.9800           | 1.0070    | 0.9660  |
| ar_hi         | 1.014      | 1.027         | 1.0680         | 1.0740                 | 1.0680       | 1.0410     | 1.0540  | 1.0740     | 1.0880      | 1.0340    | 1.027    | 1.0540    | 1.0680           | 1.0740    | 1.0610  |
| fis.hierfstat | 0.750      | 0.750         | 0.3168         | 0.2308                 | 0.4352       | 0.7804     | 0.7737  | 0.6971     | 0.4820      | 0.9167    | 0.800    | 0.7778    | 0.5403           | 0.3672    | 0.8728  |
| fis.CI.low    | 0.000      | 0.000         | 0.3169         | 0.0000                 | 0.5675       | 0.7849     | 0.8262  | 0.6609     | 0.3721      | 0.8571    | 0.500    | 0.6250    | 0.3334           | 0.7566    | 0.7840  |
| fis.CI.high   | 1.000      | 1.000         | 0.7737         | 0.6667                 | 0.8695       | 0.9802     | 0.9635  | 0.9264     | 0.7569      | 1.0000    | 1.000    | 1.0000    | 0.8800           | 0.8590    | 0.9707  |

```

BS.dartcap.x.F.tidy <- BS.dartcap.x.tidy[BS.dartcap.x.tidy$INDIVIDUALS %in%
                                     gl.x.F.filtered$ind.names,]
BS.dartcap.x.F.tidy <- BS.dartcap.x.F.tidy[!BS.dartcap.x.F.tidy$POP_ID %in%
                                           c("Indonesia"), ]
BS.dartcap.x.F.tidy$POP_ID <- factor(BS.dartcap.x.F.tidy$POP_ID)
pi.sum.X.F <- radiator::pi(
  data = BS.dartcap.x.F.tidy,
  read.length = 70,
  parallel.core = parallel::detectCores() - 1,
  path.folder = NULL,
  verbose = TRUE
)

BS.dartcap.x.M.tidy <- BS.dartcap.x.tidy[BS.dartcap.x.tidy$INDIVIDUALS %in%
                                     gl.x.M.filtered$ind.names,]
BS.dartcap.x.M.tidy <- BS.dartcap.x.M.tidy[!BS.dartcap.x.M.tidy$POP_ID %in%
                                           c("Indonesia"), ]
BS.dartcap.x.M.tidy$POP_ID <- factor(BS.dartcap.x.M.tidy$POP_ID)

pi.sum.X.M <- radiator::pi(
  data = BS.dartcap.x.M.tidy,
  read.length = 70,
  parallel.core = parallel::detectCores() - 1,
  path.folder = NULL,
  verbose = TRUE
)

save(pi.sum.X.F, pi.sum.X.M, file = "DARtcap_ALL_pi_Sites_X_FM.Rdata")

load("DARtcap_ALL_pi_FIS_Sites2.Rdata")
load("DARtcap_ALL_pi_Sites_X_FM.Rdata")
pi.sum.site$boxplot.pi

```

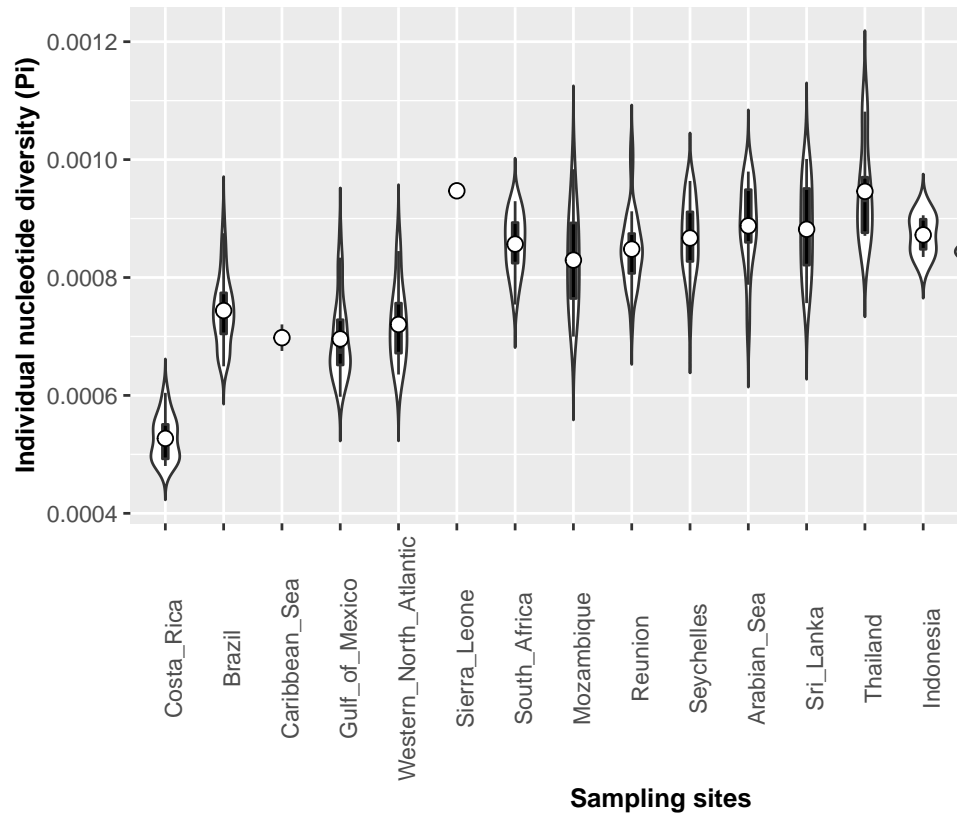

### 8.11.1.1.1 Nucleotide diversity

```
pi.sum.X.F$boxplot.pi
```

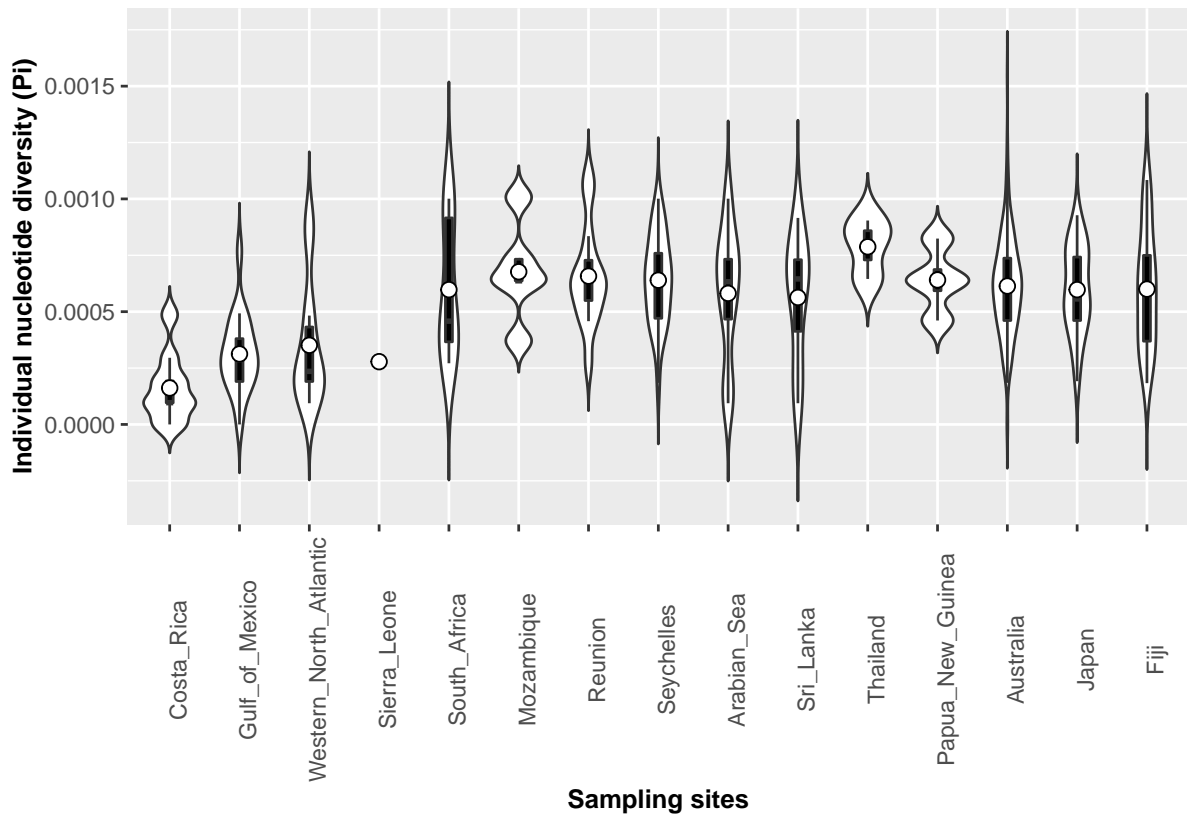

```
pi.sum.X.M$boxplot.pi
```



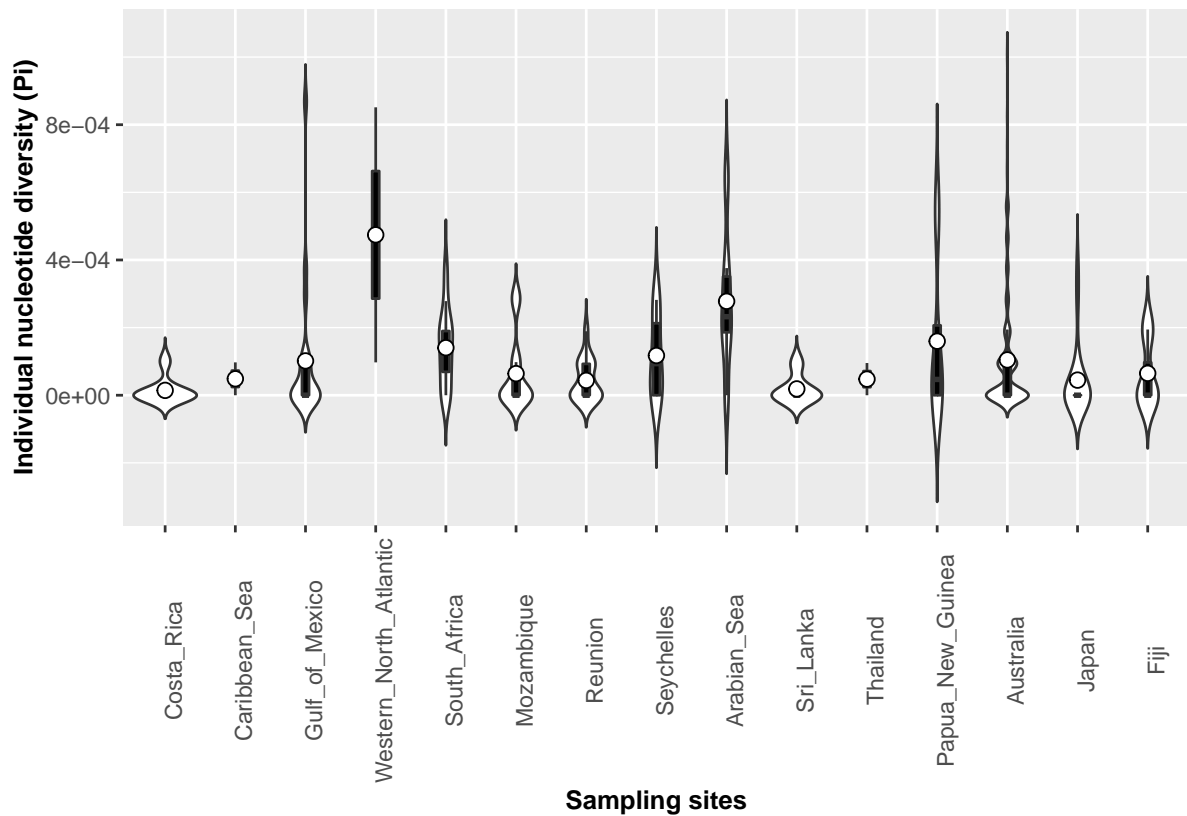

```

Fst.gt <-
  strataG::popStructTest(
    gt.all.neutral,
    nrep = 1000,
    stats = "all",
    type = "pairwise",
    keep.null = FALSE,
    quietly = TRUE,
    max.cores = parallel::detectCores() - 1,
    write.output = FALSE
  )

strata <- gt.x.F.filtered@schemes$Site
names(strata) <- gt.x.F.filtered@schemes$id
strataG::setStrata(gt.x.F.filtered) <- strata

Fst.x.F.filtered <-
  strataG::popStructTest(
    gt.x.F.filtered,
    nrep = 1000,
    stats = "all",
    type = "pairwise",
    keep.null = FALSE,
    quietly = TRUE,
    max.cores = parallel::detectCores() - 1,
    write.output = FALSE
  )

strata <- gt.x.M.filtered@schemes$Site
names(strata) <- gt.x.M.filtered@schemes$id

```

```

strataG::setStrata(gt.x.M.filtered) <- strata

Fst.x.M.filtered <-
  strataG::popStructTest(
    gt.x.M.filtered,
    nrep = 1000,
    stats = "all",
    type = "pairwise",
    keep.null = FALSE,
    quietly = TRUE,
    max.cores = parallel::detectCores() - 1,
    write.output = FALSE
  )
save(Fst.x.F.filtered, Fst.x.M.filtered,
     file = "DarTcap_ALL_FST_X_Sites.Rdata")

load("DarTcap_ALL_FST_Sites.Rdata")
load("DarTcap_ALL_FST_X_Sites.Rdata")

names.1 <- paste0(Fst.gt$pairwise$result$strata.1, "_",
                  Fst.gt$pairwise$result$strata.2)
names.2 <- paste0(Fst.x.F.filtered$pairwise$result$strata.1, "_",
                  Fst.x.F.filtered$pairwise$result$strata.2)
names.3 <- paste0(Fst.x.M.filtered$pairwise$result$strata.1, "_",
                  Fst.x.M.filtered$pairwise$result$strata.2)

result.1 <- Fst.gt$pairwise$result
result.1$names.comb <- names.1
result.2 <- Fst.x.F.filtered$pairwise$result
result.2$names.comb <- names.2
result.3 <- Fst.x.M.filtered$pairwise$result
result.3$names.comb <- names.3

data <- left_join(result.1,result.2, by = "names.comb" ) %>%
  left_join(., result.3, by = "names.comb")

pwFst <- data[,c(1:4,11:12, 24:25,32:33, 44:45,52:53)]
colnames(pwFst) <- c("strata.1", "strata.2", "n.auDNA.1", "n.auDNA.2",
                    "Fst.auDNA", "Fst.auDNA.Pval",
                    "n.xDNA.F.1", "n.xDNA.F.2", "Fst.xDNA.F", "Fst.xDNA.F.Pval",
                    "n.xDNA.M.1", "n.xDNA.M.2", "Fst.xDNA.M", "Fst.xDNA.M.Pval")

kableExtra::kbl(pwFst, digits = 4,
  caption = "Pairwise Fst for autosomal and X-linked markers in females and males",
  longtable = TRUE, booktabs = TRUE) %>%
  kableExtra::kable_styling(full_width = FALSE,font_size = 5,
    latex_options = c("repeat_header", "hold_position")) %>%
  kableExtra::landscape()

```

### 8.11.1.2 nuFst - xFst

Table 25: Pairwise Fst for autosomal and X-linked markers in females and males

| strata.1      | strata.2               | n.auDNA.1 | n.auDNA.2 | Fst.auDNA | Fst.auDNA.Pval | n.xDNA.F.1 | n.xDNA.F.2 | Fst.xDNA.F | Fst.xDNA.F.Pval | n.xDNA.M.1 | n.xDNA.M.2 | Fst.xDNA.M | Fst.xDNA.M.Pval |
|---------------|------------------------|-----------|-----------|-----------|----------------|------------|------------|------------|-----------------|------------|------------|------------|-----------------|
| Arabian Sea   | Australia              | 15        | 444       | 0.0018    | 0.0220         | 9          | 193        | -0.0076    | 0.7230          | 6          | 225        | 0.0028     | 0.4074          |
| Arabian Sea   | Brazil                 | 15        | 50        | 0.6538    | 0.0010         | NA         | NA         | NA         | NA              | NA         | NA         | NA         | NA              |
| Arabian Sea   | Caribbean Sea          | 15        | 2         | 0.6376    | 0.0166         | NA         | NA         | NA         | NA              | 6          | 2          | 0.6899     | 0.0350          |
| Arabian Sea   | Costa Rica             | 15        | 16        | 0.6703    | 0.0010         | 9          | 9          | 0.7611     | 0.0010          | 6          | 7          | 0.7948     | 0.0020          |
| Arabian Sea   | Fiji                   | 15        | 25        | 0.0273    | 0.0010         | 9          | 22         | 0.0588     | 0.0010          | 6          | 3          | NA         | NA              |
| Arabian Sea   | Gulf of Mexico         | 15        | 37        | 0.6674    | 0.0010         | 9          | 18         | 0.7427     | 0.0010          | 6          | 19         | 0.8008     | 0.0010          |
| Arabian Sea   | Indonesia              | 15        | 4         | 0.0124    | 0.0241         | 9          | 1          | -0.0347    | 0.6893          | 6          | 3          | 0.0257     | 0.3027          |
| Arabian Sea   | Japan                  | 15        | 44        | 0.0306    | 0.0010         | 9          | 25         | 0.0545     | 0.0120          | 6          | 19         | 0.1678     | 0.0010          |
| Arabian Sea   | Mozambique             | 15        | 11        | 0.0041    | 0.0380         | 9          | 5          | 0.0132     | 0.2368          | 6          | 6          | -0.0377    | 0.7423          |
| Arabian Sea   | Papua New Guinea       | 15        | 9         | 0.0067    | 0.0060         | 9          | 4          | 0.0284     | 0.1588          | 6          | 4          | -0.0878    | 0.9590          |
| Arabian Sea   | Reunion                | 15        | 28        | 0.0019    | 0.1419         | 9          | 13         | -0.0053    | 0.6134          | 6          | 15         | 0.0362     | 0.1653          |
| Arabian Sea   | Seychelles             | 15        | 36        | 0.0011    | 0.1848         | 9          | 28         | 0.0026     | 0.3776          | 6          | 8          | -0.0040    | 0.4775          |
| Arabian Sea   | Sierra Leone           | 15        | 1         | 0.1582    | 1.0000         | 9          | 1          | 0.1749     | 0.2306          | NA         | NA         | NA         | NA              |
| Arabian Sea   | South Africa           | 15        | 22        | 0.0020    | 0.0909         | 9          | 9          | -0.0312    | 0.9760          | 6          | 12         | -0.0313    | 0.7960          |
| Arabian Sea   | Sri Lanka              | 15        | 12        | -0.0014   | 0.7622         | 9          | 7          | -0.0359    | 0.9610          | 6          | 5          | 0.0532     | 0.1291          |
| Arabian Sea   | Thailand               | 15        | 5         | -0.0019   | 0.7233         | 9          | 3          | -0.0366    | 0.8412          | 6          | 2          | NA         | NA              |
| Arabian Sea   | Western North Atlantic | 15        | 8         | 0.6495    | 0.0010         | 9          | 6          | 0.7067     | 0.0010          | 6          | 2          | 0.6518     | 0.0390          |
| Australia     | Brazil                 | 444       | 50        | 0.6359    | 0.0010         | NA         | NA         | NA         | NA              | NA         | NA         | NA         | NA              |
| Australia     | Caribbean Sea          | 444       | 2         | 0.6353    | 0.0040         | NA         | NA         | NA         | NA              | 225        | 2          | 0.6879     | 0.0021          |
| Australia     | Costa Rica             | 444       | 16        | 0.6264    | 0.0010         | 193        | 9          | 0.6928     | 0.0010          | 225        | 7          | 0.7135     | 0.0010          |
| Australia     | Fiji                   | 444       | 25        | 0.0310    | 0.0010         | 193        | 22         | 0.0599     | 0.0010          | 225        | 3          | NA         | NA              |
| Australia     | Gulf of Mexico         | 444       | 37        | 0.6416    | 0.0010         | 193        | 18         | 0.6812     | 0.0010          | 225        | 19         | 0.7075     | 0.0010          |
| Australia     | Indonesia              | 444       | 4         | NA        | NA             | 193        | 1          | NA         | NA              | 225        | 3          | 0.0539     | 0.1994          |
| Australia     | Japan                  | 444       | 44        | 0.0287    | 0.0010         | 193        | 25         | 0.0304     | 0.0010          | 225        | 19         | 0.1152     | 0.0010          |
| Australia     | Mozambique             | 444       | 11        | 0.0044    | 0.0010         | 193        | 5          | 0.0286     | 0.0682          | 225        | 6          | 0.0261     | 0.1758          |
| Australia     | Papua New Guinea       | 444       | 9         | 0.0018    | 0.1179         | 193        | 4          | 0.0298     | 0.1280          | 225        | 4          | -0.0225    | 0.6108          |
| Australia     | Reunion                | 444       | 28        | 0.0052    | 0.0010         | 193        | 13         | 0.0137     | 0.0440          | 225        | 15         | 0.0293     | 0.0280          |
| Australia     | Seychelles             | 444       | 36        | 0.0015    | 0.0010         | 193        | 28         | 0.0012     | 0.3197          | 225        | 8          | 0.0341     | 0.0785          |
| Australia     | Sierra Leone           | 444       | 1         | 0.1572    | 1.0000         | 193        | 1          | 0.1869     | 0.0107          | NA         | NA         | NA         | NA              |
| Australia     | South Africa           | 444       | 22        | 0.0008    | 0.1209         | 193        | 9          | -0.0152    | 0.9510          | 225        | 12         | 0.0176     | 0.1251          |
| Australia     | Sri Lanka              | 444       | 12        | 0.0005    | 0.3127         | 193        | 7          | -0.0118    | 0.7946          | 225        | 5          | 0.0363     | 0.1721          |
| Australia     | Thailand               | 444       | 5         | 0.0014    | 0.3150         | 193        | 3          | -0.0028    | 0.4341          | 225        | 2          | NA         | NA              |
| Australia     | Western North Atlantic | 444       | 8         | 0.6385    | 0.0010         | 193        | 6          | 0.6809     | 0.0010          | 225        | 2          | 0.6803     | 0.0021          |
| Brazil        | Caribbean Sea          | 50        | 2         | 0.0016    | 0.6250         | NA         | NA         | NA         | NA              | NA         | NA         | NA         | NA              |
| Brazil        | Costa Rica             | 50        | 16        | 0.3484    | 0.0010         | NA         | NA         | NA         | NA              | NA         | NA         | NA         | NA              |
| Brazil        | Fiji                   | 50        | 25        | 0.6521    | 0.0010         | NA         | NA         | NA         | NA              | NA         | NA         | NA         | NA              |
| Brazil        | Gulf of Mexico         | 50        | 37        | 0.0049    | 0.0010         | NA         | NA         | NA         | NA              | NA         | NA         | NA         | NA              |
| Brazil        | Indonesia              | 50        | 4         | 0.6610    | 0.0016         | NA         | NA         | NA         | NA              | NA         | NA         | NA         | NA              |
| Brazil        | Japan                  | 50        | 44        | 0.6580    | 0.0010         | NA         | NA         | NA         | NA              | NA         | NA         | NA         | NA              |
| Brazil        | Mozambique             | 50        | 11        | 0.6532    | 0.0010         | NA         | NA         | NA         | NA              | NA         | NA         | NA         | NA              |
| Brazil        | Papua New Guinea       | 50        | 9         | 0.6576    | 0.0010         | NA         | NA         | NA         | NA              | NA         | NA         | NA         | NA              |
| Brazil        | Reunion                | 50        | 28        | 0.6518    | 0.0010         | NA         | NA         | NA         | NA              | NA         | NA         | NA         | NA              |
| Brazil        | Seychelles             | 50        | 36        | 0.6504    | 0.0010         | NA         | NA         | NA         | NA              | NA         | NA         | NA         | NA              |
| Brazil        | Sierra Leone           | 50        | 1         | 0.6231    | 1.0000         | NA         | NA         | NA         | NA              | NA         | NA         | NA         | NA              |
| Brazil        | South Africa           | 50        | 22        | 0.6522    | 0.0010         | NA         | NA         | NA         | NA              | NA         | NA         | NA         | NA              |
| Brazil        | Sri Lanka              | 50        | 12        | 0.6543    | 0.0010         | NA         | NA         | NA         | NA              | NA         | NA         | NA         | NA              |
| Brazil        | Thailand               | 50        | 5         | 0.6564    | 0.0012         | NA         | NA         | NA         | NA              | NA         | NA         | NA         | NA              |
| Brazil        | Western North Atlantic | 50        | 8         | 0.0037    | 0.0884         | NA         | NA         | NA         | NA              | NA         | NA         | NA         | NA              |
| Caribbean Sea | Costa Rica             | 2         | 16        | 0.4287    | 0.0845         | NA         | NA         | NA         | NA              | 2          | 7          | 0.6704     | 0.0380          |
| Caribbean Sea | Fiji                   | 2         | 25        | 0.6389    | 0.0341         | NA         | NA         | NA         | NA              | 2          | 3          | 0.7248     | 0.0939          |
| Caribbean Sea | Gulf of Mexico         | 2         | 37        | -0.0020   | 0.5714         | NA         | NA         | NA         | NA              | 2          | 19         | -0.1106    | 0.7202          |
| Caribbean Sea | Indonesia              | 2         | 4         | 0.6592    | 0.0772         | NA         | NA         | NA         | NA              | 2          | 3          | 0.7086     | 0.1089          |
| Caribbean Sea | Japan                  | 2         | 44        | 0.6537    | 0.0110         | NA         | NA         | NA         | NA              | 2          | 19         | 0.7804     | 0.0100          |

Table 25: Pairwise Fst for autosomal and X-linked markers in females and males (continued)

| strata.1       | strata.2               | n.auDNA.1 | n.auDNA.2 | Fst.auDNA | Fst.auDNA.Pval | n.xDNA.F.1 | n.xDNA.F.2 | Fst.xDNA.F | Fst.xDNA.F.Pval | n.xDNA.M.1 | n.xDNA.M.2 | Fst.xDNA.M | Fst.xDNA.M.Pval |
|----------------|------------------------|-----------|-----------|-----------|----------------|------------|------------|------------|-----------------|------------|------------|------------|-----------------|
| Caribbean Sea  | Mozambique             | 2         | 11        | 0.6367    | 0.0445         | NA         | NA         | NA         | NA              | 2          | 6          | 0.6568     | 0.0815          |
| Caribbean Sea  | Papua New Guinea       | 2         | 9         | 0.6504    | 0.0216         | NA         | NA         | NA         | NA              | 2          | 4          | 0.7336     | 0.0679          |
| Caribbean Sea  | Reunion                | 2         | 28        | 0.6401    | 0.0079         | NA         | NA         | NA         | NA              | 2          | 15         | 0.7245     | 0.0061          |
| Caribbean Sea  | Seychelles             | 2         | 36        | 0.6409    | 0.0046         | NA         | NA         | NA         | NA              | 2          | 8          | 0.6816     | 0.0161          |
| Caribbean Sea  | Sierra Leone           | 2         | 1         | 0.6360    | 0.3417         | NA         | NA         | NA         | NA              | NA         | NA         | NA         | NA              |
| Caribbean Sea  | South Africa           | 2         | 22        | 0.6396    | 0.0086         | NA         | NA         | NA         | NA              | 2          | 12         | 0.6793     | 0.0061          |
| Caribbean Sea  | Sri Lanka              | 2         | 12        | 0.6407    | 0.0192         | NA         | NA         | NA         | NA              | 2          | 5          | 0.7267     | 0.0529          |
| Caribbean Sea  | Thailand               | 2         | 5         | 0.6397    | 0.0605         | NA         | NA         | NA         | NA              | 2          | 2          | 0.7647     | 0.3187          |
| Caribbean Sea  | Western North Atlantic | 2         | 8         | -0.0077   | 1.0000         | NA         | NA         | NA         | NA              | 2          | 2          | -0.1220    | 1.0000          |
| Costa Rica     | Fiji                   | 16        | 25        | 0.6594    | 0.0010         | 9          | 22         | 0.7623     | 0.0010          | 7          | 3          | 0.8562     | 0.0063          |
| Costa Rica     | Gulf of Mexico         | 16        | 37        | 0.3692    | 0.0010         | 9          | 18         | 0.5201     | 0.0010          | 7          | 19         | 0.6018     | 0.0010          |
| Costa Rica     | Indonesia              | 16        | 4         | 0.7066    | 0.0016         | 9          | 1          | 0.9021     | 0.1250          | 7          | 3          | 0.8386     | 0.0091          |
| Costa Rica     | Japan                  | 16        | 44        | 0.6609    | 0.0010         | 9          | 25         | 0.7547     | 0.0010          | 7          | 19         | 0.8228     | 0.0010          |
| Costa Rica     | Mozambique             | 16        | 11        | 0.6766    | 0.0010         | 9          | 5          | 0.8143     | 0.0010          | 7          | 6          | 0.7916     | 0.0021          |
| Costa Rica     | Papua New Guinea       | 16        | 9         | 0.6888    | 0.0010         | 9          | 4          | 0.8405     | 0.0020          | 7          | 4          | 0.8378     | 0.0040          |
| Costa Rica     | Reunion                | 16        | 28        | 0.6579    | 0.0010         | 9          | 13         | NA         | NA              | 7          | 15         | 0.7800     | 0.0010          |
| Costa Rica     | Seychelles             | 16        | 36        | 0.6532    | 0.0010         | 9          | 28         | 0.7273     | 0.0010          | 7          | 8          | 0.7817     | 0.0010          |
| Costa Rica     | Sierra Leone           | 16        | 1         | 0.7013    | 1.0000         | 9          | 1          | 0.8934     | 0.1354          | NA         | NA         | NA         | NA              |
| Costa Rica     | South Africa           | 16        | 22        | 0.6623    | 0.0010         | 9          | 9          | 0.7768     | 0.0010          | 7          | 12         | 0.7505     | 0.0010          |
| Costa Rica     | Sri Lanka              | 16        | 12        | 0.6765    | 0.0010         | 9          | 7          | 0.7817     | 0.0010          | 7          | 5          | 0.8244     | 0.0010          |
| Costa Rica     | Thailand               | 16        | 5         | 0.6957    | 0.0012         | 9          | 3          | 0.8105     | 0.0060          | 7          | 2          | 0.8787     | 0.0326          |
| Costa Rica     | Western North Atlantic | 16        | 8         | 0.3964    | 0.0011         | 9          | 6          | 0.5826     | 0.0020          | 7          | 2          | 0.6580     | 0.0320          |
| Fiji           | Gulf of Mexico         | 25        | 37        | 0.6636    | 0.0010         | 22         | 18         | 0.7498     | 0.0010          | 3          | 19         | 0.8276     | 0.0020          |
| Fiji           | Indonesia              | 25        | 4         | NA        | NA             | 22         | 1          | 0.0951     | 0.1054          | 3          | 3          | 0.0982     | 0.3397          |
| Fiji           | Japan                  | 25        | 44        | 0.0617    | 0.0010         | 22         | 25         | 0.1148     | 0.0010          | 3          | 19         | NA         | NA              |
| Fiji           | Mozambique             | 25        | 11        | 0.0333    | 0.0010         | 22         | 5          | 0.1609     | 0.0010          | 3          | 6          | NA         | NA              |
| Fiji           | Papua New Guinea       | 25        | 9         | 0.0313    | 0.0010         | 22         | 4          | 0.0848     | 0.0051          | 3          | 4          | 0.0120     | 0.4436          |
| Fiji           | Reunion                | 25        | 28        | 0.0331    | 0.0010         | 22         | 13         | 0.0950     | 0.0010          | 3          | 15         | 0.0166     | 0.3347          |
| Fiji           | Seychelles             | 25        | 36        | 0.0318    | 0.0010         | 22         | 28         | 0.0723     | 0.0010          | 3          | 8          | NA         | NA              |
| Fiji           | Sierra Leone           | 25        | 1         | 0.1610    | 1.0000         | 22         | 1          | 0.3115     | 0.2784          | NA         | NA         | NA         | NA              |
| Fiji           | South Africa           | 25        | 22        | 0.0304    | 0.0010         | 22         | 9          | 0.0548     | 0.0040          | 3          | 12         | 0.0589     | 0.1608          |
| Fiji           | Sri Lanka              | 25        | 12        | 0.0318    | 0.0010         | 22         | 7          | 0.0654     | 0.0020          | 3          | 5          | 0.1228     | 0.0480          |
| Fiji           | Thailand               | 25        | 5         | 0.0255    | 0.0072         | 22         | 3          | 0.0657     | 0.0342          | 3          | 2          | -0.2218    | 0.9171          |
| Fiji           | Western North Atlantic | 25        | 8         | 0.6477    | 0.0010         | 22         | 6          | 0.7318     | 0.0010          | 3          | 2          | 0.6637     | 0.1044          |
| Gulf of Mexico | Indonesia              | 37        | 4         | 0.6790    | 0.0018         | 18         | 1          | 0.8293     | 0.0831          | 19         | 3          | 0.8060     | 0.0020          |
| Gulf of Mexico | Japan                  | 37        | 44        | 0.6682    | 0.0010         | 18         | 25         | 0.7451     | 0.0010          | 19         | 19         | 0.8170     | 0.0010          |
| Gulf of Mexico | Mozambique             | 37        | 11        | 0.6678    | 0.0010         | 18         | 5          | 0.7747     | 0.0010          | 19         | 6          | 0.7948     | 0.0010          |
| Gulf of Mexico | Papua New Guinea       | 37        | 9         | 0.6735    | 0.0010         | 18         | 4          | 0.7929     | 0.0010          | 19         | 4          | 0.8220     | 0.0010          |
| Gulf of Mexico | Reunion                | 37        | 28        | 0.6632    | 0.0010         | 18         | 13         | 0.7422     | 0.0010          | 19         | 15         | 0.7851     | 0.0010          |
| Gulf of Mexico | Seychelles             | 37        | 36        | 0.6609    | 0.0010         | 18         | 28         | 0.7200     | 0.0010          | 19         | 8          | 0.7963     | 0.0010          |
| Gulf of Mexico | Sierra Leone           | 37        | 1         | 0.6452    | 1.0000         | 18         | 1          | 0.8057     | 0.0661          | NA         | NA         | NA         | NA              |
| Gulf of Mexico | South Africa           | 37        | 22        | 0.6645    | 0.0010         | 18         | 9          | 0.7542     | 0.0010          | 19         | 12         | 0.7692     | 0.0010          |
| Gulf of Mexico | Sri Lanka              | 37        | 12        | 0.6690    | 0.0010         | 18         | 7          | 0.7560     | 0.0010          | 19         | 5          | 0.8164     | 0.0010          |
| Gulf of Mexico | Thailand               | 37        | 5         | 0.6734    | 0.0013         | 18         | 3          | 0.7681     | 0.0020          | 19         | 2          | 0.8304     | 0.0074          |
| Gulf of Mexico | Western North Atlantic | 37        | 8         | -0.0002   | 0.4883         | 18         | 6          | -0.0149    | 0.7213          | 19         | 2          | 0.3533     | 0.0604          |
| Indonesia      | Japan                  | 4         | 44        | NA        | NA             | 1          | 25         | NA         | NA              | 3          | 19         | 0.3125     | 0.0032          |
| Indonesia      | Mozambique             | 4         | 11        | 0.0115    | 0.1110         | 1          | 5          | -0.0165    | 0.6753          | 3          | 6          | -0.0997    | 0.7803          |
| Indonesia      | Papua New Guinea       | 4         | 9         | 0.0171    | 0.1032         | 1          | 4          | 0.1621     | 0.1958          | 3          | 4          | 0.0199     | 0.4675          |
| Indonesia      | Reunion                | 4         | 28        | 0.0125    | 0.0556         | 1          | 13         | 0.0392     | 0.3337          | 3          | 15         | 0.0022     | 0.4426          |
| Indonesia      | Seychelles             | 4         | 36        | 0.0147    | 0.0100         | 1          | 28         | NA         | NA              | 3          | 8          | 0.0430     | 0.2531          |
| Indonesia      | Sierra Leone           | 4         | 1         | 0.1862    | 1.0000         | 1          | 1          | NA         | NA              | NA         | NA         | NA         | NA              |
| Indonesia      | South Africa           | 4         | 22        | NA        | NA             | 1          | 9          | NA         | NA              | 3          | 12         | 0.0597     | 0.1858          |
| Indonesia      | Sri Lanka              | 4         | 12        | 0.0108    | 0.0829         | 1          | 7          | -0.0706    | 0.4126          | 3          | 5          | 0.1017     | 0.1598          |

Table 25: Pairwise  $F_{st}$  for autosomal and X-linked markers in females and males (*continued*)

| strata.1         | strata.2               | n.auDNA.1 | n.auDNA.2 | Fst.auDNA | Fst.auDNA.Pval | n.xDNA.F.1 | n.xDNA.F.2 | Fst.xDNA.F | Fst.xDNA.F.Pval | n.xDNA.M.1 | n.xDNA.M.2 | Fst.xDNA.M | Fst.xDNA.M.Pval |
|------------------|------------------------|-----------|-----------|-----------|----------------|------------|------------|------------|-----------------|------------|------------|------------|-----------------|
| Indonesia        | Thailand               | 4         | 5         | 0.0190    | 0.1798         | 1          | 3          | -0.0220    | 0.7762          | 3          | 2          | -0.0297    | 0.6044          |
| Indonesia        | Western North Atlantic | 4         | 8         | 0.6695    | 0.0057         | 1          | 6          | 0.8338     | 0.1359          | 3          | 2          | 0.6238     | 0.0989          |
| Japan            | Mozambique             | 44        | 11        | 0.0345    | 0.0010         | 25         | 5          | 0.0767     | 0.0180          | 19         | 6          | 0.1620     | 0.0110          |
| Japan            | Papua New Guinea       | 44        | 9         | 0.0350    | 0.0010         | 25         | 4          | 0.0382     | 0.0769          | 19         | 4          | 0.1177     | 0.0548          |
| Japan            | Reunion                | 44        | 28        | 0.0352    | 0.0010         | 25         | 13         | 0.0865     | 0.0010          | 19         | 15         | 0.2451     | 0.0010          |
| Japan            | Seychelles             | 44        | 36        | 0.0287    | 0.0010         | 25         | 28         | 0.0256     | 0.0110          | 19         | 8          | 0.1521     | 0.0010          |
| Japan            | Sierra Leone           | 44        | 1         | 0.2067    | 1.0000         | 25         | 1          | 0.1477     | 0.0397          | NA         | NA         | NA         | NA              |
| Japan            | South Africa           | 44        | 22        | 0.0318    | 0.0010         | 25         | 9          | 0.0298     | 0.0310          | 19         | 12         | 0.1652     | 0.0010          |
| Japan            | Sri Lanka              | 44        | 12        | 0.0318    | 0.0010         | 25         | 7          | 0.0201     | 0.1009          | 19         | 5          | 0.3094     | 0.0020          |
| Japan            | Thailand               | 44        | 5         | 0.0369    | 0.0040         | 25         | 3          | 0.0730     | 0.0595          | 19         | 2          | NA         | NA              |
| Japan            | Western North Atlantic | 44        | 8         | 0.6581    | 0.0010         | 25         | 6          | 0.7255     | 0.0010          | 19         | 2          | 0.7641     | 0.0036          |
| Mozambique       | Papua New Guinea       | 11        | 9         | 0.0111    | 0.0030         | 5          | 4          | 0.1287     | 0.0220          | 6          | 4          | -0.0214    | 0.5155          |
| Mozambique       | Reunion                | 11        | 28        | 0.0054    | 0.0280         | 5          | 13         | 0.0043     | 0.3566          | 6          | 15         | 0.0451     | 0.1484          |
| Mozambique       | Seychelles             | 11        | 36        | 0.0051    | 0.0040         | 5          | 28         | 0.0232     | 0.1053          | 6          | 8          | -0.0520    | 0.7932          |
| Mozambique       | Sierra Leone           | 11        | 1         | 0.1391    | 1.0000         | 5          | 1          | 0.3089     | 0.2481          | NA         | NA         | NA         | NA              |
| Mozambique       | South Africa           | 11        | 22        | 0.0012    | 0.2757         | 5          | 9          | 0.0099     | 0.3037          | 6          | 12         | 0.0265     | 0.2490          |
| Mozambique       | Sri Lanka              | 11        | 12        | 0.0033    | 0.0889         | 5          | 7          | 0.0267     | 0.1768          | 6          | 5          | 0.0429     | 0.2588          |
| Mozambique       | Thailand               | 11        | 5         | -0.0027   | 0.7239         | 5          | 3          | 0.0375     | 0.1508          | 6          | 2          | NA         | NA              |
| Mozambique       | Western North Atlantic | 11        | 8         | 0.6505    | 0.0010         | 5          | 6          | 0.7504     | 0.0030          | 6          | 2          | 0.6036     | 0.0427          |
| Papua New Guinea | Reunion                | 9         | 28        | 0.0058    | 0.0260         | 4          | 13         | 0.0691     | 0.0100          | 4          | 15         | 0.0128     | 0.3357          |
| Papua New Guinea | Seychelles             | 9         | 36        | 0.0042    | 0.0340         | 4          | 28         | 0.0434     | 0.0779          | 4          | 8          | 0.0030     | 0.3912          |
| Papua New Guinea | Sierra Leone           | 9         | 1         | 0.1688    | 1.0000         | 4          | 1          | 0.2146     | 0.2008          | NA         | NA         | NA         | NA              |
| Papua New Guinea | South Africa           | 9         | 22        | 0.0020    | 0.2168         | 4          | 9          | 0.0154     | 0.2567          | 4          | 12         | 0.0024     | 0.4486          |
| Papua New Guinea | Sri Lanka              | 9         | 12        | 0.0042    | 0.0849         | 4          | 7          | -0.0095    | 0.5654          | 4          | 5          | 0.1800     | 0.0350          |
| Papua New Guinea | Thailand               | 9         | 5         | 0.0044    | 0.1998         | 4          | 3          | 0.0495     | 0.2018          | 4          | 2          | 0.0656     | 0.1948          |
| Papua New Guinea | Western North Atlantic | 9         | 8         | 0.6609    | 0.0010         | 4          | 6          | 0.7783     | 0.0060          | 4          | 2          | 0.6814     | 0.0659          |
| Reunion          | Seychelles             | 28        | 36        | 0.0048    | 0.0010         | 13         | 28         | 0.0176     | 0.0519          | 15         | 8          | 0.0763     | 0.0170          |
| Reunion          | Sierra Leone           | 28        | 1         | 0.1589    | 1.0000         | 13         | 1          | 0.2673     | 0.1113          | NA         | NA         | NA         | NA              |
| Reunion          | South Africa           | 28        | 22        | 0.0033    | 0.0230         | 13         | 9          | -0.0174    | 0.9251          | 15         | 12         | 0.0469     | 0.0440          |
| Reunion          | Sri Lanka              | 28        | 12        | 0.0032    | 0.0809         | 13         | 7          | 0.0037     | 0.3666          | 15         | 5          | 0.1078     | 0.0190          |
| Reunion          | Thailand               | 28        | 5         | 0.0030    | 0.2380         | 13         | 3          | 0.0052     | 0.3826          | 15         | 2          | -0.1061    | 0.8256          |
| Reunion          | Western North Atlantic | 28        | 8         | 0.6485    | 0.0010         | 13         | 6          | 0.7150     | 0.0010          | 15         | 2          | 0.6998     | 0.0074          |
| Seychelles       | Sierra Leone           | 36        | 1         | 0.1641    | 1.0000         | 28         | 1          | 0.1876     | 0.0771          | NA         | NA         | NA         | NA              |
| Seychelles       | South Africa           | 36        | 22        | 0.0005    | 0.3297         | 28         | 9          | -0.0155    | 0.8911          | 8          | 12         | 0.0508     | 0.0589          |
| Seychelles       | Sri Lanka              | 36        | 12        | 0.0002    | 0.4555         | 28         | 7          | 0.0014     | 0.3610          | 8          | 5          | 0.0433     | 0.2150          |
| Seychelles       | Thailand               | 36        | 5         | 0.0046    | 0.1049         | 28         | 3          | 0.0140     | 0.2630          | 8          | 2          | NA         | NA              |
| Seychelles       | Western North Atlantic | 36        | 8         | 0.6475    | 0.0010         | 28         | 6          | 0.6982     | 0.0010          | 8          | 2          | 0.6547     | 0.0334          |
| Sierra Leone     | South Africa           | 1         | 22        | 0.1491    | 1.0000         | 1          | 9          | 0.1700     | 0.1172          | NA         | NA         | NA         | NA              |
| Sierra Leone     | Sri Lanka              | 1         | 12        | 0.1553    | 1.0000         | 1          | 7          | 0.1404     | 0.3857          | NA         | NA         | NA         | NA              |
| Sierra Leone     | Thailand               | 1         | 5         | 0.1549    | 1.0000         | 1          | 3          | 0.1502     | 0.3541          | NA         | NA         | NA         | NA              |
| Sierra Leone     | Western North Atlantic | 1         | 8         | 0.6399    | 1.0000         | 1          | 6          | 0.8145     | 0.1359          | NA         | NA         | NA         | NA              |
| South Africa     | Sri Lanka              | 22        | 12        | 0.0005    | 0.3646         | 9          | 7          | -0.0370    | 0.9770          | 12         | 5          | 0.0427     | 0.1808          |
| South Africa     | Thailand               | 22        | 5         | -0.0017   | 0.6863         | 9          | 3          | -0.0198    | 0.6372          | 12         | 2          | -0.0818    | 0.8021          |
| South Africa     | Western North Atlantic | 22        | 8         | 0.6488    | 0.0010         | 9          | 6          | 0.7243     | 0.0020          | 12         | 2          | 0.6531     | 0.0196          |
| Sri Lanka        | Thailand               | 12        | 5         | -0.0005   | 0.5654         | 7          | 3          | -0.0284    | 0.7233          | 5          | 2          | -0.0471    | 0.6104          |
| Sri Lanka        | Western North Atlantic | 12        | 8         | 0.6531    | 0.0010         | 7          | 6          | 0.7239     | 0.0020          | 5          | 2          | 0.6795     | 0.0525          |
| Thailand         | Western North Atlantic | 5         | 8         | 0.6580    | 0.0030         | 3          | 6          | 0.7358     | 0.0080          | 2          | 2          | 0.6492     | 0.3257          |

```

pwFis <- data[,c(1:4,11:12, 24:25,32:33, 44:45,52:53)]
colnames(pwFis) <- c("strata.1", "strata.2", "n.auDNA.1", "n.auDNA.2", "Fis.auDNA",
                    "Fis.auDNA.Pval",
                    "n.xDNA.F.1", "n.xDNA.F.2", "Fis.xDNA.F", "Fis.xDNA.F.Pval",
                    "n.xDNA.M.1", "n.xDNA.M.2", "Fis.xDNA.M", "Fis.xDNA.M.Pval")

kableExtra::kbl(pwFis, digits = 4,
                caption = "Pairwise Fis for autosomal and X-linked markers in females and males",
                longtable = TRUE, booktabs = TRUE) %>%
  kableExtra::kable_styling(full_width = FALSE, font_size = 5,
                             latex_options = c("repeat_header", "hold_position")) %>%
  kableExtra::landscape()

```

### 8.11.1.3 nuFis - xFis

Table 26: Pairwise Fis for autosomal and X-linked markers in females and males

| strata.1      | strata.2               | n.auDNA.1 | n.auDNA.2 | Fis.auDNA | Fis.auDNA.Pval | n.xDNA.F.1 | n.xDNA.F.2 | Fis.xDNA.F | Fis.xDNA.F.Pval | n.xDNA.M.1 | n.xDNA.M.2 | Fis.xDNA.M | Fis.xDNA.M.Pval |
|---------------|------------------------|-----------|-----------|-----------|----------------|------------|------------|------------|-----------------|------------|------------|------------|-----------------|
| Arabian Sea   | Australia              | 15        | 444       | 0.0018    | 0.0220         | 9          | 193        | -0.0076    | 0.7230          | 6          | 225        | 0.0028     | 0.4074          |
| Arabian Sea   | Brazil                 | 15        | 50        | 0.6538    | 0.0010         | NA         | NA         | NA         | NA              | NA         | NA         | NA         | NA              |
| Arabian Sea   | Caribbean Sea          | 15        | 2         | 0.6376    | 0.0166         | NA         | NA         | NA         | NA              | 6          | 2          | 0.6899     | 0.0350          |
| Arabian Sea   | Costa Rica             | 15        | 16        | 0.6703    | 0.0010         | 9          | 9          | 0.7611     | 0.0010          | 6          | 7          | 0.7948     | 0.0020          |
| Arabian Sea   | Fiji                   | 15        | 25        | 0.0273    | 0.0010         | 9          | 22         | 0.0588     | 0.0010          | 6          | 3          | NA         | NA              |
| Arabian Sea   | Gulf of Mexico         | 15        | 37        | 0.6674    | 0.0010         | 9          | 18         | 0.7427     | 0.0010          | 6          | 19         | 0.8008     | 0.0010          |
| Arabian Sea   | Indonesia              | 15        | 4         | 0.0124    | 0.0241         | 9          | 1          | -0.0347    | 0.6893          | 6          | 3          | 0.0257     | 0.3027          |
| Arabian Sea   | Japan                  | 15        | 44        | 0.0306    | 0.0010         | 9          | 25         | 0.0545     | 0.0120          | 6          | 19         | 0.1678     | 0.0010          |
| Arabian Sea   | Mozambique             | 15        | 11        | 0.0041    | 0.0380         | 9          | 5          | 0.0132     | 0.2368          | 6          | 6          | -0.0377    | 0.7423          |
| Arabian Sea   | Papua New Guinea       | 15        | 9         | 0.0067    | 0.0060         | 9          | 4          | 0.0284     | 0.1588          | 6          | 4          | -0.0878    | 0.9590          |
| Arabian Sea   | Reunion                | 15        | 28        | 0.0019    | 0.1419         | 9          | 13         | -0.0053    | 0.6134          | 6          | 15         | 0.0362     | 0.1653          |
| Arabian Sea   | Seychelles             | 15        | 36        | 0.0011    | 0.1848         | 9          | 28         | 0.0026     | 0.3776          | 6          | 8          | -0.0040    | 0.4775          |
| Arabian Sea   | Sierra Leone           | 15        | 1         | 0.1582    | 1.0000         | 9          | 1          | 0.1749     | 0.2306          | NA         | NA         | NA         | NA              |
| Arabian Sea   | South Africa           | 15        | 22        | 0.0020    | 0.0909         | 9          | 9          | -0.0312    | 0.9760          | 6          | 12         | -0.0313    | 0.7960          |
| Arabian Sea   | Sri Lanka              | 15        | 12        | -0.0014   | 0.7622         | 9          | 7          | -0.0359    | 0.9610          | 6          | 5          | 0.0532     | 0.1291          |
| Arabian Sea   | Thailand               | 15        | 5         | -0.0019   | 0.7233         | 9          | 3          | -0.0366    | 0.8412          | 6          | 2          | NA         | NA              |
| Arabian Sea   | Western North Atlantic | 15        | 8         | 0.6495    | 0.0010         | 9          | 6          | 0.7067     | 0.0010          | 6          | 2          | 0.6518     | 0.0390          |
| Australia     | Brazil                 | 444       | 50        | 0.6359    | 0.0010         | NA         | NA         | NA         | NA              | NA         | NA         | NA         | NA              |
| Australia     | Caribbean Sea          | 444       | 2         | 0.6353    | 0.0040         | NA         | NA         | NA         | NA              | 225        | 2          | 0.6879     | 0.0021          |
| Australia     | Costa Rica             | 444       | 16        | 0.6264    | 0.0010         | 193        | 9          | 0.6928     | 0.0010          | 225        | 7          | 0.7135     | 0.0010          |
| Australia     | Fiji                   | 444       | 25        | 0.0310    | 0.0010         | 193        | 22         | 0.0599     | 0.0010          | 225        | 3          | NA         | NA              |
| Australia     | Gulf of Mexico         | 444       | 37        | 0.6416    | 0.0010         | 193        | 18         | 0.6812     | 0.0010          | 225        | 19         | 0.7075     | 0.0010          |
| Australia     | Indonesia              | 444       | 4         | NA        | NA             | 193        | 1          | NA         | NA              | 225        | 3          | 0.0539     | 0.1994          |
| Australia     | Japan                  | 444       | 44        | 0.0287    | 0.0010         | 193        | 25         | 0.0304     | 0.0010          | 225        | 19         | 0.1152     | 0.0010          |
| Australia     | Mozambique             | 444       | 11        | 0.0044    | 0.0010         | 193        | 5          | 0.0286     | 0.0682          | 225        | 6          | 0.0261     | 0.1758          |
| Australia     | Papua New Guinea       | 444       | 9         | 0.0018    | 0.1179         | 193        | 4          | 0.0298     | 0.1280          | 225        | 4          | -0.0225    | 0.6108          |
| Australia     | Reunion                | 444       | 28        | 0.0052    | 0.0010         | 193        | 13         | 0.0137     | 0.0440          | 225        | 15         | 0.0293     | 0.0280          |
| Australia     | Seychelles             | 444       | 36        | 0.0015    | 0.0010         | 193        | 28         | 0.0012     | 0.3197          | 225        | 8          | 0.0341     | 0.0785          |
| Australia     | Sierra Leone           | 444       | 1         | 0.1572    | 1.0000         | 193        | 1          | 0.1869     | 0.0107          | NA         | NA         | NA         | NA              |
| Australia     | South Africa           | 444       | 22        | 0.0008    | 0.1209         | 193        | 9          | -0.0152    | 0.9510          | 225        | 12         | 0.0176     | 0.1251          |
| Australia     | Sri Lanka              | 444       | 12        | 0.0005    | 0.3127         | 193        | 7          | -0.0118    | 0.7946          | 225        | 5          | 0.0363     | 0.1721          |
| Australia     | Thailand               | 444       | 5         | 0.0014    | 0.3150         | 193        | 3          | -0.0028    | 0.4341          | 225        | 2          | NA         | NA              |
| Australia     | Western North Atlantic | 444       | 8         | 0.6385    | 0.0010         | 193        | 6          | 0.6809     | 0.0010          | 225        | 2          | 0.6803     | 0.0021          |
| Brazil        | Caribbean Sea          | 50        | 2         | 0.0016    | 0.6250         | NA         | NA         | NA         | NA              | NA         | NA         | NA         | NA              |
| Brazil        | Costa Rica             | 50        | 16        | 0.3484    | 0.0010         | NA         | NA         | NA         | NA              | NA         | NA         | NA         | NA              |
| Brazil        | Fiji                   | 50        | 25        | 0.6521    | 0.0010         | NA         | NA         | NA         | NA              | NA         | NA         | NA         | NA              |
| Brazil        | Gulf of Mexico         | 50        | 37        | 0.0049    | 0.0010         | NA         | NA         | NA         | NA              | NA         | NA         | NA         | NA              |
| Brazil        | Indonesia              | 50        | 4         | 0.6610    | 0.0016         | NA         | NA         | NA         | NA              | NA         | NA         | NA         | NA              |
| Brazil        | Japan                  | 50        | 44        | 0.6580    | 0.0010         | NA         | NA         | NA         | NA              | NA         | NA         | NA         | NA              |
| Brazil        | Mozambique             | 50        | 11        | 0.6532    | 0.0010         | NA         | NA         | NA         | NA              | NA         | NA         | NA         | NA              |
| Brazil        | Papua New Guinea       | 50        | 9         | 0.6576    | 0.0010         | NA         | NA         | NA         | NA              | NA         | NA         | NA         | NA              |
| Brazil        | Reunion                | 50        | 28        | 0.6518    | 0.0010         | NA         | NA         | NA         | NA              | NA         | NA         | NA         | NA              |
| Brazil        | Seychelles             | 50        | 36        | 0.6504    | 0.0010         | NA         | NA         | NA         | NA              | NA         | NA         | NA         | NA              |
| Brazil        | Sierra Leone           | 50        | 1         | 0.6231    | 1.0000         | NA         | NA         | NA         | NA              | NA         | NA         | NA         | NA              |
| Brazil        | South Africa           | 50        | 22        | 0.6522    | 0.0010         | NA         | NA         | NA         | NA              | NA         | NA         | NA         | NA              |
| Brazil        | Sri Lanka              | 50        | 12        | 0.6543    | 0.0010         | NA         | NA         | NA         | NA              | NA         | NA         | NA         | NA              |
| Brazil        | Thailand               | 50        | 5         | 0.6564    | 0.0012         | NA         | NA         | NA         | NA              | NA         | NA         | NA         | NA              |
| Brazil        | Western North Atlantic | 50        | 8         | 0.0037    | 0.0884         | NA         | NA         | NA         | NA              | NA         | NA         | NA         | NA              |
| Caribbean Sea | Costa Rica             | 2         | 16        | 0.4287    | 0.0845         | NA         | NA         | NA         | NA              | 2          | 7          | 0.6704     | 0.0380          |
| Caribbean Sea | Fiji                   | 2         | 25        | 0.6389    | 0.0341         | NA         | NA         | NA         | NA              | 2          | 3          | 0.7248     | 0.0939          |
| Caribbean Sea | Gulf of Mexico         | 2         | 37        | -0.0020   | 0.5714         | NA         | NA         | NA         | NA              | 2          | 19         | -0.1106    | 0.7202          |
| Caribbean Sea | Indonesia              | 2         | 4         | 0.6592    | 0.0772         | NA         | NA         | NA         | NA              | 2          | 3          | 0.7086     | 0.1089          |
| Caribbean Sea | Japan                  | 2         | 44        | 0.6537    | 0.0110         | NA         | NA         | NA         | NA              | 2          | 19         | 0.7804     | 0.0100          |

Table 26: Pairwise Fis for autosomal and X-linked markers in females and males (continued)

| strata.1       | strata.2               | n.auDNA.1 | n.auDNA.2 | Fis.auDNA | Fis.auDNA.Pval | n.xDNA.F.1 | n.xDNA.F.2 | Fis.xDNA.F | Fis.xDNA.F.Pval | n.xDNA.M.1 | n.xDNA.M.2 | Fis.xDNA.M | Fis.xDNA.M.Pval |
|----------------|------------------------|-----------|-----------|-----------|----------------|------------|------------|------------|-----------------|------------|------------|------------|-----------------|
| Caribbean Sea  | Mozambique             | 2         | 11        | 0.6367    | 0.0445         | NA         | NA         | NA         | NA              | 2          | 6          | 0.6568     | 0.0815          |
| Caribbean Sea  | Papua New Guinea       | 2         | 9         | 0.6504    | 0.0216         | NA         | NA         | NA         | NA              | 2          | 4          | 0.7336     | 0.0679          |
| Caribbean Sea  | Reunion                | 2         | 28        | 0.6401    | 0.0079         | NA         | NA         | NA         | NA              | 2          | 15         | 0.7245     | 0.0061          |
| Caribbean Sea  | Seychelles             | 2         | 36        | 0.6409    | 0.0046         | NA         | NA         | NA         | NA              | 2          | 8          | 0.6816     | 0.0161          |
| Caribbean Sea  | Sierra Leone           | 2         | 1         | 0.6360    | 0.3417         | NA         | NA         | NA         | NA              | NA         | NA         | NA         | NA              |
| Caribbean Sea  | South Africa           | 2         | 22        | 0.6396    | 0.0086         | NA         | NA         | NA         | NA              | 2          | 12         | 0.6793     | 0.0061          |
| Caribbean Sea  | Sri Lanka              | 2         | 12        | 0.6407    | 0.0192         | NA         | NA         | NA         | NA              | 2          | 5          | 0.7267     | 0.0529          |
| Caribbean Sea  | Thailand               | 2         | 5         | 0.6397    | 0.0605         | NA         | NA         | NA         | NA              | 2          | 2          | 0.7647     | 0.3187          |
| Caribbean Sea  | Western North Atlantic | 2         | 8         | -0.0077   | 1.0000         | NA         | NA         | NA         | NA              | 2          | 2          | -0.1220    | 1.0000          |
| Costa Rica     | Fiji                   | 16        | 25        | 0.6594    | 0.0010         | 9          | 22         | 0.7623     | 0.0010          | 7          | 3          | 0.8562     | 0.0063          |
| Costa Rica     | Gulf of Mexico         | 16        | 37        | 0.3692    | 0.0010         | 9          | 18         | 0.5201     | 0.0010          | 7          | 19         | 0.6018     | 0.0010          |
| Costa Rica     | Indonesia              | 16        | 4         | 0.7066    | 0.0016         | 9          | 1          | 0.9021     | 0.1250          | 7          | 3          | 0.8386     | 0.0091          |
| Costa Rica     | Japan                  | 16        | 44        | 0.6609    | 0.0010         | 9          | 25         | 0.7547     | 0.0010          | 7          | 19         | 0.8228     | 0.0010          |
| Costa Rica     | Mozambique             | 16        | 11        | 0.6766    | 0.0010         | 9          | 5          | 0.8143     | 0.0010          | 7          | 6          | 0.7916     | 0.0021          |
| Costa Rica     | Papua New Guinea       | 16        | 9         | 0.6888    | 0.0010         | 9          | 4          | 0.8405     | 0.0020          | 7          | 4          | 0.8378     | 0.0040          |
| Costa Rica     | Reunion                | 16        | 28        | 0.6579    | 0.0010         | 9          | 13         | NA         | NA              | 7          | 15         | 0.7800     | 0.0010          |
| Costa Rica     | Seychelles             | 16        | 36        | 0.6532    | 0.0010         | 9          | 28         | 0.7273     | 0.0010          | 7          | 8          | 0.7817     | 0.0010          |
| Costa Rica     | Sierra Leone           | 16        | 1         | 0.7013    | 1.0000         | 9          | 1          | 0.8934     | 0.1354          | NA         | NA         | NA         | NA              |
| Costa Rica     | South Africa           | 16        | 22        | 0.6623    | 0.0010         | 9          | 9          | 0.7768     | 0.0010          | 7          | 12         | 0.7505     | 0.0010          |
| Costa Rica     | Sri Lanka              | 16        | 12        | 0.6765    | 0.0010         | 9          | 7          | 0.7817     | 0.0010          | 7          | 5          | 0.8244     | 0.0010          |
| Costa Rica     | Thailand               | 16        | 5         | 0.6957    | 0.0012         | 9          | 3          | 0.8105     | 0.0060          | 7          | 2          | 0.8787     | 0.0326          |
| Costa Rica     | Western North Atlantic | 16        | 8         | 0.3964    | 0.0011         | 9          | 6          | 0.5826     | 0.0020          | 7          | 2          | 0.6580     | 0.0320          |
| Fiji           | Gulf of Mexico         | 25        | 37        | 0.6636    | 0.0010         | 22         | 18         | 0.7498     | 0.0010          | 3          | 19         | 0.8276     | 0.0020          |
| Fiji           | Indonesia              | 25        | 4         | NA        | NA             | 22         | 1          | 0.0951     | 0.1054          | 3          | 3          | 0.0982     | 0.3397          |
| Fiji           | Japan                  | 25        | 44        | 0.0617    | 0.0010         | 22         | 25         | 0.1148     | 0.0010          | 3          | 19         | NA         | NA              |
| Fiji           | Mozambique             | 25        | 11        | 0.0333    | 0.0010         | 22         | 5          | 0.1609     | 0.0010          | 3          | 6          | NA         | NA              |
| Fiji           | Papua New Guinea       | 25        | 9         | 0.0313    | 0.0010         | 22         | 4          | 0.0848     | 0.0051          | 3          | 4          | 0.0120     | 0.4436          |
| Fiji           | Reunion                | 25        | 28        | 0.0331    | 0.0010         | 22         | 13         | 0.0950     | 0.0010          | 3          | 15         | 0.0166     | 0.3347          |
| Fiji           | Seychelles             | 25        | 36        | 0.0318    | 0.0010         | 22         | 28         | 0.0723     | 0.0010          | 3          | 8          | NA         | NA              |
| Fiji           | Sierra Leone           | 25        | 1         | 0.1610    | 1.0000         | 22         | 1          | 0.3115     | 0.2784          | NA         | NA         | NA         | NA              |
| Fiji           | South Africa           | 25        | 22        | 0.0304    | 0.0010         | 22         | 9          | 0.0548     | 0.0040          | 3          | 12         | 0.0589     | 0.1608          |
| Fiji           | Sri Lanka              | 25        | 12        | 0.0318    | 0.0010         | 22         | 7          | 0.0654     | 0.0020          | 3          | 5          | 0.1228     | 0.0480          |
| Fiji           | Thailand               | 25        | 5         | 0.0255    | 0.0072         | 22         | 3          | 0.0657     | 0.0342          | 3          | 2          | -0.2218    | 0.9171          |
| Fiji           | Western North Atlantic | 25        | 8         | 0.6477    | 0.0010         | 22         | 6          | 0.7318     | 0.0010          | 3          | 2          | 0.6637     | 0.1044          |
| Gulf of Mexico | Indonesia              | 37        | 4         | 0.6790    | 0.0018         | 18         | 1          | 0.8293     | 0.0831          | 19         | 3          | 0.8060     | 0.0020          |
| Gulf of Mexico | Japan                  | 37        | 44        | 0.6682    | 0.0010         | 18         | 25         | 0.7451     | 0.0010          | 19         | 19         | 0.8170     | 0.0010          |
| Gulf of Mexico | Mozambique             | 37        | 11        | 0.6678    | 0.0010         | 18         | 5          | 0.7747     | 0.0010          | 19         | 6          | 0.7948     | 0.0010          |
| Gulf of Mexico | Papua New Guinea       | 37        | 9         | 0.6735    | 0.0010         | 18         | 4          | 0.7929     | 0.0010          | 19         | 4          | 0.8220     | 0.0010          |
| Gulf of Mexico | Reunion                | 37        | 28        | 0.6632    | 0.0010         | 18         | 13         | 0.7422     | 0.0010          | 19         | 15         | 0.7851     | 0.0010          |
| Gulf of Mexico | Seychelles             | 37        | 36        | 0.6609    | 0.0010         | 18         | 28         | 0.7200     | 0.0010          | 19         | 8          | 0.7963     | 0.0010          |
| Gulf of Mexico | Sierra Leone           | 37        | 1         | 0.6452    | 1.0000         | 18         | 1          | 0.8057     | 0.0661          | NA         | NA         | NA         | NA              |
| Gulf of Mexico | South Africa           | 37        | 22        | 0.6645    | 0.0010         | 18         | 9          | 0.7542     | 0.0010          | 19         | 12         | 0.7692     | 0.0010          |
| Gulf of Mexico | Sri Lanka              | 37        | 12        | 0.6690    | 0.0010         | 18         | 7          | 0.7560     | 0.0010          | 19         | 5          | 0.8164     | 0.0010          |
| Gulf of Mexico | Thailand               | 37        | 5         | 0.6734    | 0.0013         | 18         | 3          | 0.7681     | 0.0020          | 19         | 2          | 0.8304     | 0.0074          |
| Gulf of Mexico | Western North Atlantic | 37        | 8         | -0.0002   | 0.4883         | 18         | 6          | -0.0149    | 0.7213          | 19         | 2          | 0.3533     | 0.0604          |
| Indonesia      | Japan                  | 4         | 44        | NA        | NA             | 1          | 25         | NA         | NA              | 3          | 19         | 0.3125     | 0.0032          |
| Indonesia      | Mozambique             | 4         | 11        | 0.0115    | 0.1110         | 1          | 5          | -0.0165    | 0.6753          | 3          | 6          | -0.0997    | 0.7803          |
| Indonesia      | Papua New Guinea       | 4         | 9         | 0.0171    | 0.1032         | 1          | 4          | 0.1621     | 0.1958          | 3          | 4          | 0.0199     | 0.4675          |
| Indonesia      | Reunion                | 4         | 28        | 0.0125    | 0.0556         | 1          | 13         | 0.0392     | 0.3337          | 3          | 15         | 0.0022     | 0.4426          |
| Indonesia      | Seychelles             | 4         | 36        | 0.0147    | 0.0100         | 1          | 28         | NA         | NA              | 3          | 8          | 0.0430     | 0.2531          |
| Indonesia      | Sierra Leone           | 4         | 1         | 0.1862    | 1.0000         | 1          | 1          | NA         | NA              | NA         | NA         | NA         | NA              |
| Indonesia      | South Africa           | 4         | 22        | NA        | NA             | 1          | 9          | NA         | NA              | 3          | 12         | 0.0597     | 0.1858          |
| Indonesia      | Sri Lanka              | 4         | 12        | 0.0108    | 0.0829         | 1          | 7          | -0.0706    | 0.4126          | 3          | 5          | 0.1017     | 0.1598          |



Table 26: Pairwise Fis for autosomal and X-linked markers in females and males (continued)

| strata.1         | strata.2               | n.auDNA.1 | n.auDNA.2 | Fis.auDNA | Fis.auDNA.Pval | n.xDNA.F.1 | n.xDNA.F.2 | Fis.xDNA.F | Fis.xDNA.F.Pval | n.xDNA.M.1 | n.xDNA.M.2 | Fis.xDNA.M | Fis.xDNA.M.Pval |
|------------------|------------------------|-----------|-----------|-----------|----------------|------------|------------|------------|-----------------|------------|------------|------------|-----------------|
| Indonesia        | Thailand               | 4         | 5         | 0.0190    | 0.1798         | 1          | 3          | -0.0220    | 0.7762          | 3          | 2          | -0.0297    | 0.6044          |
| Indonesia        | Western North Atlantic | 4         | 8         | 0.6695    | 0.0057         | 1          | 6          | 0.8338     | 0.1359          | 3          | 2          | 0.6238     | 0.0989          |
| Japan            | Mozambique             | 44        | 11        | 0.0345    | 0.0010         | 25         | 5          | 0.0767     | 0.0180          | 19         | 6          | 0.1620     | 0.0110          |
| Japan            | Papua New Guinea       | 44        | 9         | 0.0350    | 0.0010         | 25         | 4          | 0.0382     | 0.0769          | 19         | 4          | 0.1177     | 0.0548          |
| Japan            | Reunion                | 44        | 28        | 0.0352    | 0.0010         | 25         | 13         | 0.0865     | 0.0010          | 19         | 15         | 0.2451     | 0.0010          |
| Japan            | Seychelles             | 44        | 36        | 0.0287    | 0.0010         | 25         | 28         | 0.0256     | 0.0110          | 19         | 8          | 0.1521     | 0.0010          |
| Japan            | Sierra Leone           | 44        | 1         | 0.2067    | 1.0000         | 25         | 1          | 0.1477     | 0.0397          | NA         | NA         | NA         | NA              |
| Japan            | South Africa           | 44        | 22        | 0.0318    | 0.0010         | 25         | 9          | 0.0298     | 0.0310          | 19         | 12         | 0.1652     | 0.0010          |
| Japan            | Sri Lanka              | 44        | 12        | 0.0318    | 0.0010         | 25         | 7          | 0.0201     | 0.1009          | 19         | 5          | 0.3094     | 0.0020          |
| Japan            | Thailand               | 44        | 5         | 0.0369    | 0.0040         | 25         | 3          | 0.0730     | 0.0595          | 19         | 2          | NA         | NA              |
| Japan            | Western North Atlantic | 44        | 8         | 0.6581    | 0.0010         | 25         | 6          | 0.7255     | 0.0010          | 19         | 2          | 0.7641     | 0.0036          |
| Mozambique       | Papua New Guinea       | 11        | 9         | 0.0111    | 0.0030         | 5          | 4          | 0.1287     | 0.0220          | 6          | 4          | -0.0214    | 0.5155          |
| Mozambique       | Reunion                | 11        | 28        | 0.0054    | 0.0280         | 5          | 13         | 0.0043     | 0.3566          | 6          | 15         | 0.0451     | 0.1484          |
| Mozambique       | Seychelles             | 11        | 36        | 0.0051    | 0.0040         | 5          | 28         | 0.0232     | 0.1053          | 6          | 8          | -0.0520    | 0.7932          |
| Mozambique       | Sierra Leone           | 11        | 1         | 0.1391    | 1.0000         | 5          | 1          | 0.3089     | 0.2481          | NA         | NA         | NA         | NA              |
| Mozambique       | South Africa           | 11        | 22        | 0.0012    | 0.2757         | 5          | 9          | 0.0099     | 0.3037          | 6          | 12         | 0.0265     | 0.2490          |
| Mozambique       | Sri Lanka              | 11        | 12        | 0.0033    | 0.0889         | 5          | 7          | 0.0267     | 0.1768          | 6          | 5          | 0.0429     | 0.2588          |
| Mozambique       | Thailand               | 11        | 5         | -0.0027   | 0.7239         | 5          | 3          | 0.0375     | 0.1508          | 6          | 2          | NA         | NA              |
| Mozambique       | Western North Atlantic | 11        | 8         | 0.6505    | 0.0010         | 5          | 6          | 0.7504     | 0.0030          | 6          | 2          | 0.6036     | 0.0427          |
| Papua New Guinea | Reunion                | 9         | 28        | 0.0058    | 0.0260         | 4          | 13         | 0.0691     | 0.0100          | 4          | 15         | 0.0128     | 0.3357          |
| Papua New Guinea | Seychelles             | 9         | 36        | 0.0042    | 0.0340         | 4          | 28         | 0.0434     | 0.0779          | 4          | 8          | 0.0030     | 0.3912          |
| Papua New Guinea | Sierra Leone           | 9         | 1         | 0.1688    | 1.0000         | 4          | 1          | 0.2146     | 0.2008          | NA         | NA         | NA         | NA              |
| Papua New Guinea | South Africa           | 9         | 22        | 0.0020    | 0.2168         | 4          | 9          | 0.0154     | 0.2567          | 4          | 12         | 0.0024     | 0.4486          |
| Papua New Guinea | Sri Lanka              | 9         | 12        | 0.0042    | 0.0849         | 4          | 7          | -0.0095    | 0.5654          | 4          | 5          | 0.1800     | 0.0350          |
| Papua New Guinea | Thailand               | 9         | 5         | 0.0044    | 0.1998         | 4          | 3          | 0.0495     | 0.2018          | 4          | 2          | 0.0656     | 0.1948          |
| Papua New Guinea | Western North Atlantic | 9         | 8         | 0.6609    | 0.0010         | 4          | 6          | 0.7783     | 0.0060          | 4          | 2          | 0.6814     | 0.0659          |
| Reunion          | Seychelles             | 28        | 36        | 0.0048    | 0.0010         | 13         | 28         | 0.0176     | 0.0519          | 15         | 8          | 0.0763     | 0.0170          |
| Reunion          | Sierra Leone           | 28        | 1         | 0.1589    | 1.0000         | 13         | 1          | 0.2673     | 0.1113          | NA         | NA         | NA         | NA              |
| Reunion          | South Africa           | 28        | 22        | 0.0033    | 0.0230         | 13         | 9          | -0.0174    | 0.9251          | 15         | 12         | 0.0469     | 0.0440          |
| Reunion          | Sri Lanka              | 28        | 12        | 0.0032    | 0.0809         | 13         | 7          | 0.0037     | 0.3666          | 15         | 5          | 0.1078     | 0.0190          |
| Reunion          | Thailand               | 28        | 5         | 0.0030    | 0.2380         | 13         | 3          | 0.0052     | 0.3826          | 15         | 2          | -0.1061    | 0.8256          |
| Reunion          | Western North Atlantic | 28        | 8         | 0.6485    | 0.0010         | 13         | 6          | 0.7150     | 0.0010          | 15         | 2          | 0.6998     | 0.0074          |
| Seychelles       | Sierra Leone           | 36        | 1         | 0.1641    | 1.0000         | 28         | 1          | 0.1876     | 0.0771          | NA         | NA         | NA         | NA              |
| Seychelles       | South Africa           | 36        | 22        | 0.0005    | 0.3297         | 28         | 9          | -0.0155    | 0.8911          | 8          | 12         | 0.0508     | 0.0589          |
| Seychelles       | Sri Lanka              | 36        | 12        | 0.0002    | 0.4555         | 28         | 7          | 0.0014     | 0.3610          | 8          | 5          | 0.0433     | 0.2150          |
| Seychelles       | Thailand               | 36        | 5         | 0.0046    | 0.1049         | 28         | 3          | 0.0140     | 0.2630          | 8          | 2          | NA         | NA              |
| Seychelles       | Western North Atlantic | 36        | 8         | 0.6475    | 0.0010         | 28         | 6          | 0.6982     | 0.0010          | 8          | 2          | 0.6547     | 0.0334          |
| Sierra Leone     | South Africa           | 1         | 22        | 0.1491    | 1.0000         | 1          | 9          | 0.1700     | 0.1172          | NA         | NA         | NA         | NA              |
| Sierra Leone     | Sri Lanka              | 1         | 12        | 0.1553    | 1.0000         | 1          | 7          | 0.1404     | 0.3857          | NA         | NA         | NA         | NA              |
| Sierra Leone     | Thailand               | 1         | 5         | 0.1549    | 1.0000         | 1          | 3          | 0.1502     | 0.3541          | NA         | NA         | NA         | NA              |
| Sierra Leone     | Western North Atlantic | 1         | 8         | 0.6399    | 1.0000         | 1          | 6          | 0.8145     | 0.1359          | NA         | NA         | NA         | NA              |
| South Africa     | Sri Lanka              | 22        | 12        | 0.0005    | 0.3646         | 9          | 7          | -0.0370    | 0.9770          | 12         | 5          | 0.0427     | 0.1808          |
| South Africa     | Thailand               | 22        | 5         | -0.0017   | 0.6863         | 9          | 3          | -0.0198    | 0.6372          | 12         | 2          | -0.0818    | 0.8021          |
| South Africa     | Western North Atlantic | 22        | 8         | 0.6488    | 0.0010         | 9          | 6          | 0.7243     | 0.0020          | 12         | 2          | 0.6531     | 0.0196          |
| Sri Lanka        | Thailand               | 12        | 5         | -0.0005   | 0.5654         | 7          | 3          | -0.0284    | 0.7233          | 5          | 2          | -0.0471    | 0.6104          |
| Sri Lanka        | Western North Atlantic | 12        | 8         | 0.6531    | 0.0010         | 7          | 6          | 0.7239     | 0.0020          | 5          | 2          | 0.6795     | 0.0525          |
| Thailand         | Western North Atlantic | 5         | 8         | 0.6580    | 0.0030         | 3          | 6          | 0.7358     | 0.0080          | 2          | 2          | 0.6492     | 0.3257          |

### 8.11.2 Individual-based tests by Site

```
pop.levels <- c("Costa Rica", "Brazil", "Caribbean Sea", "Gulf of Mexico",
               "Western North Atlantic", "Sierra Leone", "South Africa",
               "Mozambique", "Reunion", "Seychelles", "Arabian Sea", "Sri Lanka",
               "Thailand", "Indonesia", "Papua New Guinea", "Australia",
               "Japan", "Fiji")

gl <- BS.dartcap.gl
gl$pop <- factor(gl$other$ind.metrics$Site, levels = pop.levels)
gl <- gl[order(gl$pop, gl$ind.names)]

gl$other$ind.metrics$`TL (mm)` <- as.integer(gl$other$ind.metrics$`TL (mm)`)
gl <- gl[(gl$other$ind.metrics$`TL (mm)` > 1500 &
        !is.na(gl$other$ind.metrics$`TL (mm)`)) | gl$pop == "Fiji",] #Because all Fiji samples w
gl <- gl[!gl$other$ind.metrics$Site %in% c("Caribbean Sea", "Sierra Leone",
                                           "Indonesia", "Japan"),] #need at least 2 samples per group

Pop <- gl$pop

table(gl$other$ind.metrics$Site, gl$other$ind.metrics$COMBINED_SEX)

df <- as.data.frame(gl)
df[df == 0] <- 11
df[df == 1] <- 12
df[df == 2] <- 22
dat <- data.frame(as.character(Pop) , df)
sex <- gl$other$ind.metrics$Sex
dat <- dat[sex != "U",]
sex <- sex[sex != "U"]

FST <- hierfstat::sexbias.test(dat, sex, nperm = 100,
                              test = "FST", alternative = "two.sided")
#for mean you need at least 2 individuals per group
FIS <- hierfstat::sexbias.test(dat, sex, nperm = 100,
                              test = "FIS", alternative = "two.sided")
#for mean you need at least 2 individuals per group
mAIC <- hierfstat::sexbias.test(dat, sex, nperm = 100,
                               test = "mAIC", alternative = "two.sided")
#for mean you need at least 2 individuals per group
vAIC <- hierfstat::sexbias.test(dat, sex, nperm = 100,
                               test = "vAIC", alternative = "two.sided")
#for mean you need at least 2 individuals per group

aic <- hierfstat::AIC(dat)
plot.data <- data.frame(sex, aic)
rownames(plot.data) <- rownames(dat)

save(FST, FIS, mAIC, vAIC, aic, plot.data,
     file = "DARtcap_ALL_Aic_sex_Sites_OnlyAdults.Rdata")

load("DARtcap_ALL_Aic_sex_Sites_OnlyAdults.Rdata")

print(FST)
print(FIS)
print(mAIC)
print(vAIC)
```

```

sex <- plot.data$sex
aic.F <- aic[sex == "F"]
aic.M <- aic[sex == "M"]

maic.F <- mean(aic.F, na.rm = TRUE)
maic.M <- mean(aic.M, na.rm = TRUE)
vaic.F <- var(aic.F, na.rm = TRUE)
vaic.M <- var(aic.M, na.rm = TRUE)

df <- data.frame(INDIVIDUALS = BS.dartcap.gl$ind.names,
                 pop = BS.dartcap.gl$other$ind.metrics$Site)
test.data <- data.frame(INDIVIDUALS = rownames(plot.data),plot.data,
                       stringsAsFactors = FALSE)

test.data %<>% dplyr::left_join(df, by = "INDIVIDUALS")
plot.data <- test.data
pop.levels <- c("Gulf of Mexico", "Western North Atlantic","Mozambique",
               "Reunion" , "Seychelles", "Arabian Sea", "Sri Lanka",
               "Australia", "Fiji")
plot.data$pop <- factor(plot.data$pop, levels = pop.levels)

aic.plot <- ggplot2::ggplot() +
  ggplot2::geom_histogram(data = subset(plot.data, sex == "F"),
                          ggplot2::aes(aic, fill = "F", y = ..count..),
                          binwidth = 5) +
  ggplot2::geom_histogram(data = subset(plot.data, sex == "M"),
                          ggplot2::aes(aic, fill = "M", y = -..count..),
                          binwidth = 5) +
  ggplot2::geom_hline(yintercept = 0) +
  ggplot2::scale_fill_manual(values = c("#E69F00", "#56B4E9"),
                             labels = c("Female", "Male")) +
  ggplot2::labs(x = "Corrected assignment index",
               y = "Number of individuals",
               fill = "") +
  ggplot2::facet_grid(pop~., scales = "free_y") +
  ggplot2::theme_minimal() +
  ggplot2::theme(
    axis.text.x = ggplot2::element_text(size = 10, angle = 0, face = "bold"),
    axis.text.y = ggplot2::element_text(size = 10, angle = 0, face = "bold"),
    axis.title = ggplot2::element_text(size = 15),
    legend.text = ggplot2::element_text(hjust = 0, size = 15),
    legend.title = ggplot2::element_text(hjust = 0, size = 15),
    strip.text.y = element_text(angle = 0,size = 10)
  )
print(aic.plot)

```

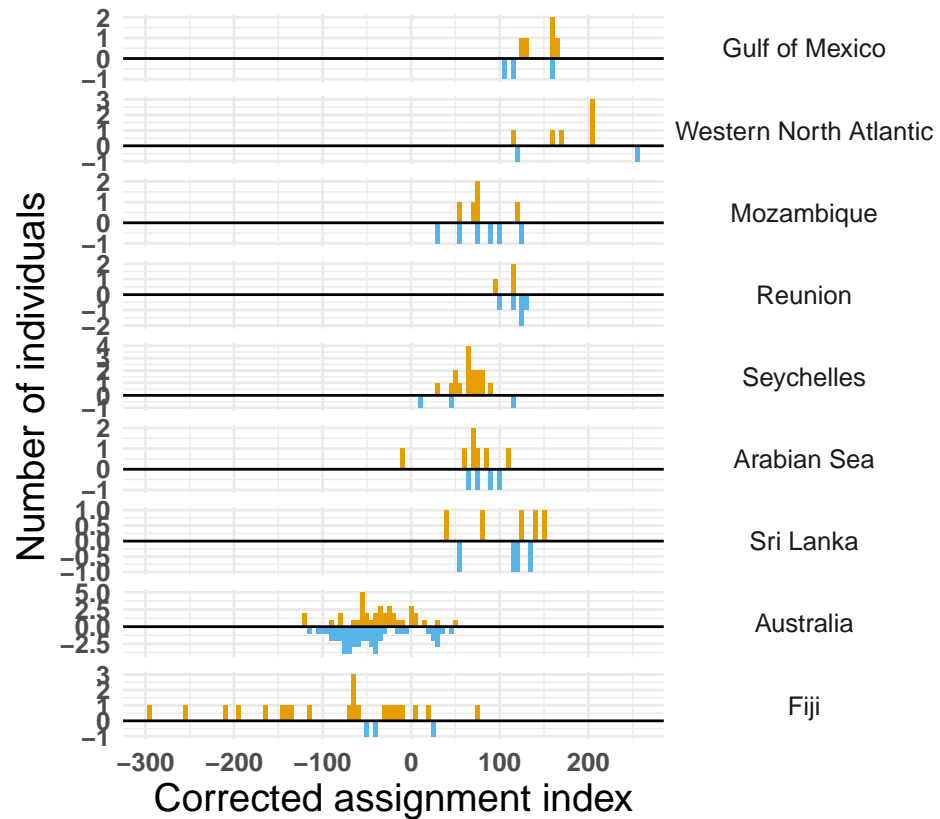

### 8.11.2.1 Individual assignment

```
ggplot2::ggsave(plot = aic.plot,
  filename = "DAR_Tcap_ALL_Aic_sex_Sites_OnlyAdults3.png",
  width = 30, height = 20, units = "cm")

res <- plot.data[(plot.data$pop == "Arabian Sea" & plot.data$aic < 0 &
  !is.na(plot.data$aic)) |
  (plot.data$pop == "Australia" & plot.data$aic < (-106) &
  !is.na(plot.data$aic)) |
  (plot.data$pop == "Fiji" & plot.data$aic < (-100) &
  !is.na(plot.data$aic)), ]

knitr::kable(res, digits = 4,
  caption = "Individuals with low population assignment indices") %>%
  kableExtra::kable_styling(full_width = FALSE, font_size = 9,
  latex_options = c("hold_position"))
```

```
## $call
## hierfstat::sexbias.test(dat = dat, sex = sex, nperm = 100, test = "FST",
##   alternative = "two.sided")
##
## $statistic
## [1] 0.02967566
##
## $p.value
## [1] 1
##
## $call
## hierfstat::sexbias.test(dat = dat, sex = sex, nperm = 100, test = "FIS",
##   alternative = "two.sided")
##
## $statistic
```

```
## [1] 0.01131135
##
## $p.value
## [1] 0.63
##
## $call
## hierfstat::sexbias.test(dat = dat, sex = sex, nperm = 100, test = "mAIC",
##   alternative = "two.sided")
##
## $statistic
## [1] 0.5283601
##
## $p.value
## [1] 0.48
##
## $call
## hierfstat::sexbias.test(dat = dat, sex = sex, nperm = 100, test = "vAIC",
##   alternative = "two.sided")
##
## $statistic
## [1] 1.386015
##
## $p.value
## [1] 0.12
```

Table 27: Individuals with low population assignment indices

|     | INDIVIDUALS   | sex | aic       | pop         |
|-----|---------------|-----|-----------|-------------|
| 58  | CL-ARS012-F   | F   | -9.2111   | Arabian Sea |
| 147 | CLSH047-F     | F   | -118.9014 | Australia   |
| 153 | CLSH055-M     | M   | -116.2028 | Australia   |
| 157 | CLSH059-F     | F   | -119.5633 | Australia   |
| 173 | CL-FIJ005-F.1 | F   | -146.8808 | Fiji        |
| 186 | CL-FIJ021-F   | F   | -253.5579 | Fiji        |
| 187 | CL-FIJ022-F   | F   | -292.7706 | Fiji        |
| 188 | CL-FIJ023-F   | F   | -138.5194 | Fiji        |
| 189 | CL-FIJ024-F   | F   | -116.8141 | Fiji        |
| 190 | CL-FIJ026-F   | F   | -162.5851 | Fiji        |
| 191 | CL-FIJ027-F   | F   | -132.5392 | Fiji        |
| 192 | CL-FIJ029-F   | F   | -195.0195 | Fiji        |
| 193 | CL-FIJ031-F   | F   | -208.0313 | Fiji        |

```
strata <- BS.dartcap.gt@schemes$Site
names(strata) <- BS.dartcap.gt@schemes$INDIVIDUALS
strataG::setStrata(BS.dartcap.gt) <- strata

BS.dartcap.gt@schemes$`TL (mm)` <- as.integer(BS.dartcap.gt@schemes$`TL (mm)`)
gt.all.F <- BS.dartcap.gt[BS.dartcap.gt@schemes$COMBINED_SEX == "F" &
  (BS.dartcap.gt@schemes$`TL (mm)` > 1500 &
  !is.na(BS.dartcap.gt@schemes$`TL (mm)`)|
  BS.dartcap.gt@schemes$Site == "Fiji"),]
gt.all.M <- BS.dartcap.gt[BS.dartcap.gt@schemes$COMBINED_SEX == "M" &
  BS.dartcap.gt@schemes$`TL (mm)` > 1500 &
  (!is.na(BS.dartcap.gt@schemes$`TL (mm)`)|
  BS.dartcap.gt@schemes$Site == "Fiji"),]

Fst.all.pop.F <-
```

```

strataG::popStructTest(
  gt.all.F,
  nrep = 1000,
  stats = c("fst", "fis"),
  type = "pairwise",
  keep.null = FALSE,
  quietly = TRUE,
  max.cores = parallel::detectCores() - 1,
  write.output = FALSE
)
Fst.all.pop.M <-
strataG::popStructTest(
  gt.all.M,
  nrep = 1000,
  stats = c("fst", "fis"),
  type = "pairwise",
  keep.null = FALSE,
  quietly = TRUE,
  max.cores = parallel::detectCores() - 1,
  write.output = FALSE
)
save(Fst.all.pop.F, Fst.all.pop.M, file = "DARtcap_ALL_Fst_sex_Site2.Rdata")

```

```

load("DARtcap_ALL_Fst_sex_Site2.Rdata")
dim(Fst.all.pop.F$pairwise$result) #91 8
dim(Fst.all.pop.M$pairwise$result) #66 8

names.1 <- paste0(Fst.all.pop.F$pairwise$result$strata.1,"_",
  Fst.all.pop.F$pairwise$result$strata.2)
names.2 <- paste0(Fst.all.pop.M$pairwise$result$strata.1,"_",
  Fst.all.pop.M$pairwise$result$strata.2)

result.1 <- Fst.all.pop.F$pairwise$result
result.1$names.comb <- names.1
result.2 <- Fst.all.pop.M$pairwise$result
result.2$names.comb <- names.2

data <- left_join(result.1,result.2, by = "names.comb" )

pwFst.FM <- data[,c(1:6, 12:15)]
colnames(pwFst.FM) <- c("strata.1", "strata.2", "n.auDNA.F.1", "n.auDNA.F.2",
  "Fst.auDNA.F", "Fst.auDNA.F.Pval",
  "n.auDNA.M.1", "n.auDNA.M.2", "Fst.auDNA.M",
  "Fst.auDNA.M.Pval")
knitr::kable(pwFst.FM, digits = 4,
  caption = "Pairwise Fst between females and males for autosomal markers") %>%
  kableExtra::kable_styling(full_width = FALSE,font_size = 5,
    latex_options = c( "hold_position")) %>%
  kableExtra::landscape()

```

### 8.11.2.2 Fst test

```

## [1] 36 8
## [1] 21 8

```

Table 28: Pairwise Fst between females and males for autosomal markers

| strata.1    | strata.2     | n.auDNA.F.1 | n.auDNA.F.2 | Fst.auDNA.F | Fst.auDNA.F.Pval | n.auDNA.M.1 | n.auDNA.M.2 | Fst.auDNA.M | Fst.auDNA.M.Pval |
|-------------|--------------|-------------|-------------|-------------|------------------|-------------|-------------|-------------|------------------|
| Arabian Sea | Australia    | 12          | 48          | 0.0016      | 0.1199           | NA          | NA          | NA          | NA               |
| Arabian Sea | Brazil       | 12          | 29          | 0.6526      | 0.0010           | NA          | NA          | NA          | NA               |
| Arabian Sea | Fiji         | 12          | 5           | 0.0288      | 0.0010           | NA          | NA          | NA          | NA               |
| Arabian Sea | Japan        | 12          | 2           | NA          | NA               | NA          | NA          | NA          | NA               |
| Arabian Sea | Mozambique   | 12          | 3           | NA          | NA               | NA          | NA          | NA          | NA               |
| Arabian Sea | Reunion      | 12          | 1           | NA          | NA               | NA          | NA          | NA          | NA               |
| Arabian Sea | Seychelles   | 12          | 4           | -0.0050     | 0.8452           | NA          | NA          | NA          | NA               |
| Arabian Sea | South Africa | 12          | 11          | 0.0033      | 0.0699           | NA          | NA          | NA          | NA               |
| Australia   | Brazil       | 48          | 29          | 0.6449      | 0.0010           | 62          | 10          | 0.6375      | 0.0010           |
| Australia   | Fiji         | 48          | 5           | 0.0292      | 0.0010           | 62          | 4           | NA          | NA               |
| Australia   | Japan        | 48          | 2           | NA          | NA               | NA          | NA          | NA          | NA               |
| Australia   | Mozambique   | 48          | 3           | NA          | NA               | 62          | 1           | NA          | NA               |
| Australia   | Reunion      | 48          | 1           | NA          | NA               | NA          | NA          | NA          | NA               |
| Australia   | Seychelles   | 48          | 4           | -0.0020     | 0.6863           | 62          | 3           | 0.0085      | 0.0570           |
| Australia   | South Africa | 48          | 11          | 0.0047      | 0.0020           | 62          | 2           | NA          | NA               |
| Brazil      | Fiji         | 29          | 5           | 0.6589      | 0.0011           | 10          | 4           | 0.6483      | 0.0034           |
| Brazil      | Japan        | 29          | 2           | 0.6688      | 0.0444           | NA          | NA          | NA          | NA               |
| Brazil      | Mozambique   | 29          | 3           | 0.6553      | 0.0055           | 10          | 1           | NA          | NA               |
| Brazil      | Reunion      | 29          | 1           | NA          | NA               | NA          | NA          | NA          | NA               |
| Brazil      | Seychelles   | 29          | 4           | 0.6572      | 0.0014           | 10          | 3           | 0.6580      | 0.0079           |
| Brazil      | South Africa | 29          | 11          | 0.6546      | 0.0010           | 10          | 2           | 0.6600      | 0.0755           |
| Fiji        | Japan        | 5           | 2           | NA          | NA               | NA          | NA          | NA          | NA               |
| Fiji        | Mozambique   | 5           | 3           | 0.0214      | 0.0334           | 4           | 1           | NA          | NA               |
| Fiji        | Reunion      | 5           | 1           | NA          | NA               | NA          | NA          | NA          | NA               |
| Fiji        | Seychelles   | 5           | 4           | 0.0150      | 0.0300           | 4           | 3           | 0.0318      | 0.0545           |
| Fiji        | South Africa | 5           | 11          | 0.0240      | 0.0030           | 4           | 2           | 0.0306      | 0.2331           |
| Japan       | Mozambique   | 2           | 3           | 0.0687      | 0.1755           | NA          | NA          | NA          | NA               |
| Japan       | Reunion      | 2           | 1           | 0.2182      | 0.3297           | NA          | NA          | NA          | NA               |
| Japan       | Seychelles   | 2           | 4           | 0.0917      | 0.0904           | NA          | NA          | NA          | NA               |
| Japan       | South Africa | 2           | 11          | NA          | NA               | NA          | NA          | NA          | NA               |
| Mozambique  | Reunion      | 3           | 1           | NA          | NA               | NA          | NA          | NA          | NA               |
| Mozambique  | Seychelles   | 3           | 4           | NA          | NA               | 1           | 3           | NA          | NA               |
| Mozambique  | South Africa | 3           | 11          | NA          | NA               | 1           | 2           | 0.0748      | 0.3377           |
| Reunion     | Seychelles   | 1           | 4           | NA          | NA               | NA          | NA          | NA          | NA               |
| Reunion     | South Africa | 1           | 11          | NA          | NA               | NA          | NA          | NA          | NA               |
| Seychelles  | South Africa | 4           | 11          | -0.0088     | 0.9590           | 3           | 2           | 0.0418      | 0.1094           |

```

pwFis.FM <- data[,c(1:4,7:8, 12:13,16:17)]
colnames(pwFis.FM) <- c("strata.1", "strata.2", "n.auDNA.F.1", "n.auDNA.F.2",
                        "Fis.auDNA.F", "Fis.auDNA.F.Pval",
                        "n.auDNA.M.1", "n.auDNA.M.2", "Fis.auDNA.M",
                        "Fis.auDNA.M.Pval")
knitr::kable(pwFis.FM, digits = 4,
             caption = "Pairwise Fis between females and males for autosomal markers") %>%
  kableExtra::kable_styling(full_width = FALSE, font_size = 5,
                            latex_options = c("hold_position")) %>%
  kableExtra::landscape()

```

### 8.11.2.3 Fis test



Table 29: Pairwise Fis between females and males for autosomal markers

| strata.1    | strata.2     | n.auDNA.F.1 | n.auDNA.F.2 | Fis.auDNA.F | Fis.auDNA.F.Pval | n.auDNA.M.1 | n.auDNA.M.2 | Fis.auDNA.M | Fis.auDNA.M.Pval |
|-------------|--------------|-------------|-------------|-------------|------------------|-------------|-------------|-------------|------------------|
| Arabian Sea | Australia    | 12          | 48          | -9.0058     | 0.1858           | NA          | NA          | NA          | NA               |
| Arabian Sea | Brazil       | 12          | 29          | -9.0370     | 1.0000           | NA          | NA          | NA          | NA               |
| Arabian Sea | Fiji         | 12          | 5           | -125.9573   | 1.0000           | NA          | NA          | NA          | NA               |
| Arabian Sea | Japan        | 12          | 2           | NA          | NA               | NA          | NA          | NA          | NA               |
| Arabian Sea | Mozambique   | 12          | 3           | NA          | NA               | NA          | NA          | NA          | NA               |
| Arabian Sea | Reunion      | 12          | 1           | NA          | NA               | NA          | NA          | NA          | NA               |
| Arabian Sea | Seychelles   | 12          | 4           | 367.8651    | 0.6845           | NA          | NA          | NA          | NA               |
| Arabian Sea | South Africa | 12          | 11          | -17.2164    | 0.9111           | NA          | NA          | NA          | NA               |
| Australia   | Brazil       | 48          | 29          | -5.1005     | 1.0000           | 62          | 10          | -6.2749     | 1.0000           |
| Australia   | Fiji         | 48          | 5           | -17.6149    | 1.0000           | 62          | 4           | NA          | NA               |
| Australia   | Japan        | 48          | 2           | NA          | NA               | NA          | NA          | NA          | NA               |
| Australia   | Mozambique   | 48          | 3           | NA          | NA               | 62          | 1           | NA          | NA               |
| Australia   | Reunion      | 48          | 1           | NA          | NA               | NA          | NA          | NA          | NA               |
| Australia   | Seychelles   | 48          | 4           | -22.5505    | 0.6372           | 62          | 3           | -43.3537    | 0.9922           |
| Australia   | South Africa | 48          | 11          | -9.6001     | 0.3437           | 62          | 2           | NA          | NA               |
| Brazil      | Fiji         | 29          | 5           | -25.5253    | 1.0000           | 10          | 4           | NA          | NA               |
| Brazil      | Japan        | 29          | 2           | NA          | NA               | NA          | NA          | NA          | NA               |
| Brazil      | Mozambique   | 29          | 3           | NA          | NA               | 10          | 1           | NA          | NA               |
| Brazil      | Reunion      | 29          | 1           | NA          | NA               | NA          | NA          | NA          | NA               |
| Brazil      | Seychelles   | 29          | 4           | -36.1107    | 1.0000           | 10          | 3           | 20.0861     | 0.1136           |
| Brazil      | South Africa | 29          | 11          | -9.8749     | 1.0000           | 10          | 2           | NA          | NA               |
| Fiji        | Japan        | 5           | 2           | NA          | NA               | NA          | NA          | NA          | NA               |
| Fiji        | Mozambique   | 5           | 3           | NA          | NA               | 4           | 1           | NA          | NA               |
| Fiji        | Reunion      | 5           | 1           | NA          | NA               | NA          | NA          | NA          | NA               |
| Fiji        | Seychelles   | 5           | 4           | 15.6026     | 0.4627           | 4           | 3           | NA          | NA               |
| Fiji        | South Africa | 5           | 11          | -662.8514   | 0.9960           | 4           | 2           | NA          | NA               |
| Japan       | Mozambique   | 2           | 3           | NA          | NA               | NA          | NA          | NA          | NA               |
| Japan       | Reunion      | 2           | 1           | NA          | NA               | NA          | NA          | NA          | NA               |
| Japan       | Seychelles   | 2           | 4           | NA          | NA               | NA          | NA          | NA          | NA               |
| Japan       | South Africa | 2           | 11          | NA          | NA               | NA          | NA          | NA          | NA               |
| Mozambique  | Reunion      | 3           | 1           | NA          | NA               | NA          | NA          | NA          | NA               |
| Mozambique  | Seychelles   | 3           | 4           | NA          | NA               | 1           | 3           | NA          | NA               |
| Mozambique  | South Africa | 3           | 11          | NA          | NA               | 1           | 2           | NA          | NA               |
| Reunion     | Seychelles   | 1           | 4           | NA          | NA               | NA          | NA          | NA          | NA               |
| Reunion     | South Africa | 1           | 11          | NA          | NA               | NA          | NA          | NA          | NA               |
| Seychelles  | South Africa | 4           | 11          | 106.2843    | 0.6607           | 3           | 2           | NA          | NA               |

**8.11.2.4 Spatial correlation** Test the correlation between the genetic and geographic distance between the sampling sites. The genetic distance is calculated based on Fst and Euclidean distance.

```
# geographic file that contain coordinates of the 8 sampling locations
coord.sites <- readr::read_csv(file = "Least_cost_distance_Sites.csv")
coord.sites <- coord.sites[!coord.sites$Site %in% c("Costa.Rica", "Brazil",
                                                "Caribbean.Sea", "Sierra.Leone",
                                                "South.Africa", "Thailand",
                                                "Indonesia", "Papua.New.Guinea",
                                                "Japan"),]

world <- marmap::getNOAA.bathy(lon1 = -180, lon2 = 180, lat1 = -90, lat2 = 90,
                             resolution = 10) #Res 10 good for calculating a least cost path

dist.sites <- round(fossil::earth.dist(as.matrix(coord.sites[,-1])), 0)
trans1 <- marmap::trans.mat(world)
lc.dist.sites1 <- round(marmap::lc.dist(trans1, as.matrix(coord.sites[,-1]),
                                       res = "dist"), 0)
trans2 <- marmap::trans.mat(world,min.depth=-1, max.depth=-200)
lc.dist.sites2 <- round(marmap::lc.dist(trans2, as.matrix(coord.sites[,-1]),
                                       res = "dist"), 0)

pop.levels <- c("Costa Rica" , "Brazil","Caribbean Sea", "Gulf of Mexico",
               "Western North Atlantic", "Sierra Leone", "South Africa",
               "Mozambique", "Reunion" , "Seychelles", "Arabian Sea", "Sri Lanka",
               "Thailand", "Indonesia", "Papua New Guinea" , "Australia",
               "Japan", "Fiji")
gl <- BS.dartcap.gl
gl$pop <- factor(gl$other$ind.metrics$Site, levels = pop.levels)
gl <- gl[order(gl$pop,gl$ind.names)]

gl$other$ind.metrics$`TL (mm)` <- as.integer(gl$other$ind.metrics$`TL (mm)` )
gl <- gl[(gl$other$ind.metrics$`TL (mm)` > 1500 &
        !is.na(gl$other$ind.metrics$`TL (mm)`)) | gl$pop == "Fiji",] #Because all Fiji samples w
gl <- gl[!gl$other$ind.metrics$Site %in% c("Caribbean Sea", "Sierra Leone",
                                          "Indonesia", "Japan"),] #need at least 2 samples per grow

table(gl$pop, gl$other$ind.metrics$COMBINED_SEX)
gl.F <- gl[gl$other$ind.metrics$COMBINED_SEX == "F",]
gl.M <- gl[gl$other$ind.metrics$COMBINED_SEX == "M",]

gi.F <- gl2gi_mvb(gl.F)
gi.M <- gl2gi_mvb(gl.M)
gpop <- adegenet::genind2genpop(gi.F)
Eucl.D.F <- adegenet::dist.genpop(gpop,method = 2) #method 2 Euclidean = Angular distance
gpop <- adegenet::genind2genpop(gi.M)
Eucl.D.M <- adegenet::dist.genpop(gpop,method = 2) #method 2 Euclidean = Angular distance

save(world, dist.sites, lc.dist.sites1, lc.dist.sites2, Eucl.D.F,
     Eucl.D.M, file = "DARtcap_ALL_autocorr_by_sex_Sites2.Rdata")

load("DARtcap_ALL_autocorr_by_sex_Sites2.Rdata")
load("DARtcap_ALL_autocorr_by_sex_Sites.Rdata")

Dgeo <- lc.dist.sites1
Dgen.F <- Eucl.D.F
Dgen.M <- Eucl.D.M
```

```
fst.test.F <- ade4::mantel.randtest(Dgen.F, Dgeo, nrepet = 10000)
plot(fst.test.F)
```

### Histogram of sim

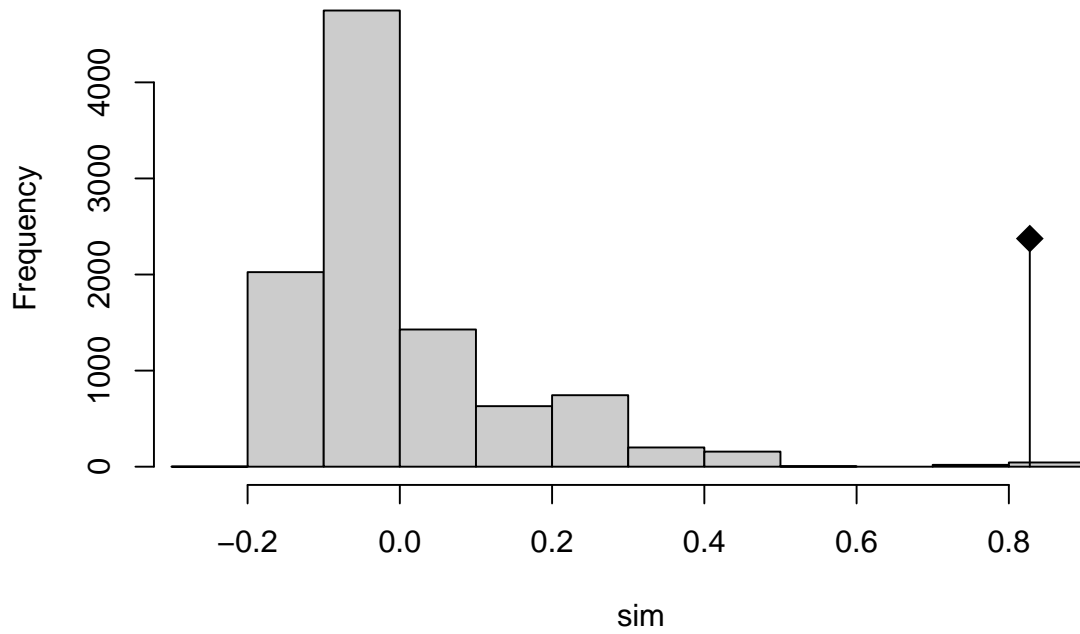

```
fst.test.F
fst.test.M <- ade4::mantel.randtest(Dgen.M, Dgeo, nrepet = 10000)
plot(fst.test.M)
```

### Histogram of sim

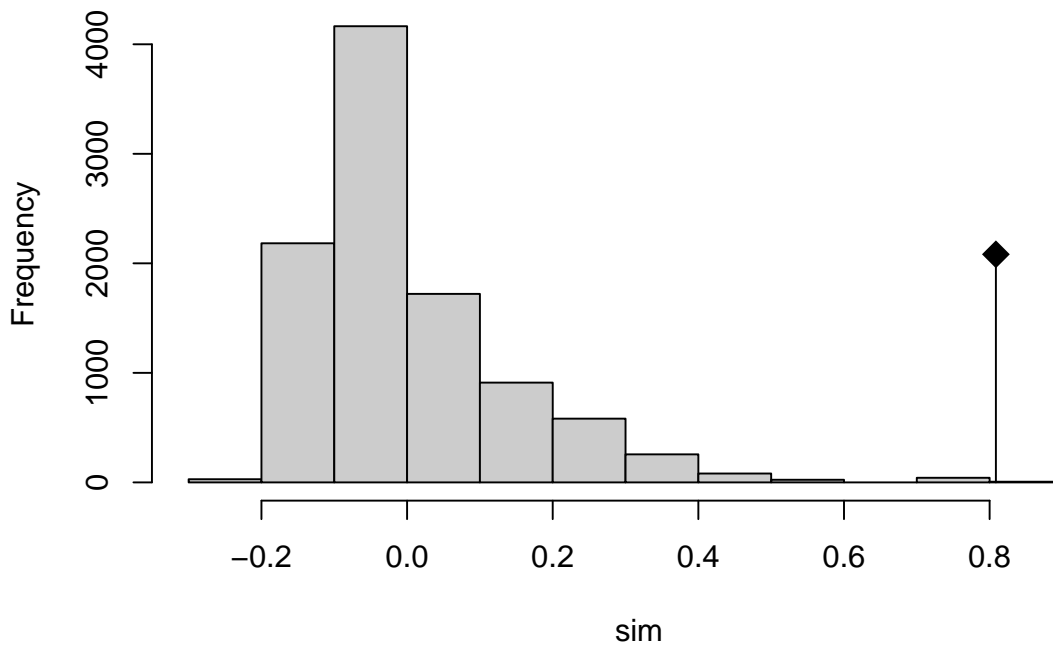

```
fst.test.M

corr.test.F <- vegan::mantel.correlog(
  Dgen.F, D.geo = Dgeo, XY = NULL, n.class = 11, break.pts = NULL,
  cutoff = FALSE, r.type = "pearson", nperm = 10000, mult = "holm",
  progressive = TRUE)
corr.test.F.data <- as.data.frame(corr.test.F$mantel.res)
corr.test.F.data$Sex <- "Female"

corr.test.M <- vegan::mantel.correlog(
  Dgen.M, D.geo = Dgeo, XY = NULL, n.class = 11, break.pts = NULL,
  cutoff = FALSE, r.type = "pearson", nperm = 10000, mult = "holm",
  progressive = TRUE)
corr.test.M.data <- as.data.frame(corr.test.M$mantel.res)
corr.test.M.data$Sex <- "Male"

plot.data <- rbind(corr.test.F.data, corr.test.M.data)

sig <- ifelse(plot.data$Pr.corrected. <= 0.05, "sig", "non-sig")
# sig <- ifelse(plot.data$Pr.Mantel. <= 0.05, "sig", "non-sig")
sig_cat <- sig
sig_cat[sig_cat == "sig" & plot.data$Mantel.cor < 0] <- "Lower"
sig_cat[sig_cat == "sig" & plot.data$Mantel.cor > 0] <- "Higher"
sig_cat[sig_cat == "non-sig"] <- "Neutral"
plot.data$sig <- factor(sig, levels = c("sig", "non-sig"))
plot.data$sig_cat <- factor(sig_cat, levels = c("Lower", "Neutral", "Higher"))

plot <- ggplot2::ggplot(plot.data, ggplot2::aes(x = class.index,
  y = Mantel.cor)) +
```

```

ggplot2::geom_hline(yintercept = 0,
  linetype = "dotted",
  size = 0.5) +
ggplot2::geom_line(ggplot2::aes(group = Sex, color = Sex),
  size = 1) +
ggplot2::geom_point(ggplot2::aes(fill = sig_cat), size = 4,
  shape = 21) +
ggplot2::scale_fill_manual(values = c(alpha("darkblue", 0.6),
  gray.colors(12)[6], "red"),
  labels = c("Significantly lower",
  "Non-significant",
  "Significantly higher")) +
ggplot2::scale_color_manual(values = c("#E69F00", "#56B4E9")) +
ggplot2::theme_bw() +
ggplot2::theme(
  panel.background = ggplot2::element_rect(color = "white", fill = "white"),
  panel.grid.major.x = ggplot2::element_line(size = 0.1, color = "black"),
  axis.line = ggplot2::element_line(color = "black", size = 0.35),
  axis.text.x = ggplot2::element_text(size = 10, angle = 0, face = "bold"),
  axis.title = ggplot2::element_text(size = 15),
  axis.ticks = ggplot2::element_line(size = 0.15),
  legend.text = ggplot2::element_text(hjust = 0, size = 10),
  legend.title = ggplot2::element_text(hjust = 0, size = 10),
  panel.grid.major.y = ggplot2::element_blank(),
  panel.grid.minor.y = ggplot2::element_blank(),
  legend.position = "top",
  strip.text = ggplot2::element_text(size = 10)
) +
# ggplot2::labs(title = "Euclidean distance") +
ggplot2::xlab("Pairwise geographic distance (km)") +
ylab("Mantel spatial correlation") +
ggplot2::guides(
  fill = ggplot2::guide_legend(title = ""),
  color = ggplot2::guide_legend(title = "")
)
print(plot)

```

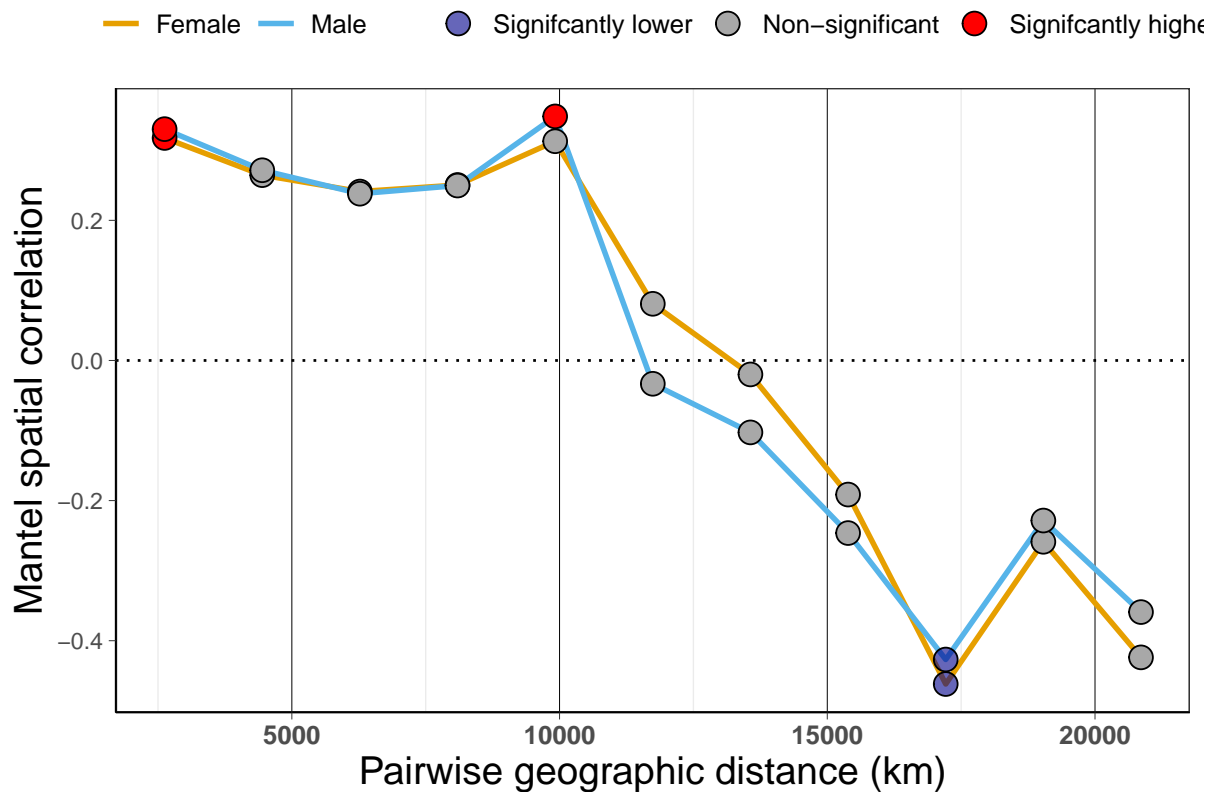

```
ggplot2::ggsave(plot = plot,
  filename = "DArTcap_ALL_autocorr_by_sex_Sites_EUCL_FM3.png",
  width = 30, height = 15, units = "cm")
```

```
## Monte-Carlo test
## Call: ade4::mantel.randtest(m1 = Dgen.F, m2 = Dgeo, nrepet = 10000)
##
## Observation: 0.827511
##
## Based on 10000 replicates
## Simulated p-value: 0.00019998
## Alternative hypothesis: greater
##
##      Std.Obs  Expectation  Variance
## 5.700761e+00 -7.302451e-05 2.107456e-02
## Monte-Carlo test
## Call: ade4::mantel.randtest(m1 = Dgen.M, m2 = Dgeo, nrepet = 10000)
##
## Observation: 0.8086319
##
## Based on 10000 replicates
## Simulated p-value: 0.00039996
## Alternative hypothesis: greater
##
##      Std.Obs  Expectation  Variance
## 5.7551025251 -0.0002985323 0.0197567815
```

```
gl <- BS.dartcap.gl
pop.levels <- c("Costa Rica", "Brazil", "Caribbean Sea", "Gulf of Mexico",
  "Western North Atlantic", "Sierra Leone", "South Africa",
```

```

        "Mozambique", "Reunion" , "Seychelles", "Arabian Sea",
        "Sri Lanka", "Thailand", "Indonesia", "Papua New Guinea" ,
        "Australia", "Japan", "Fiji")
gl <- BS.dartcap.gl
gl$pop <- factor(gl$other$ind.metrics$Site, levels = pop.levels)
gl <- gl[order(gl$pop, gl$ind.names)]
gl$other$ind.metrics$ TL (mm)` <- as.integer(gl$other$ind.metrics$`TL (mm)` )
gl <- gl[(gl$other$ind.metrics$`TL (mm)` > 1500 &
        !is.na(gl$other$ind.metrics$`TL (mm)`)) | gl$pop == "Fiji",] #Because all Fiji samples w
gl <- gl[!gl$other$ind.metrics$Site %in% c("Caribbean Sea", "Sierra Leone", "Indonesia",
        "Japan"),] #need at least 2 samples per group
gl$other$loc.metrics.flags$monomorphs <- FALSE
gl$other$loc.metrics.flags$CallRate <- FALSE

gl2rel <- function(gl, filename = "relate"){
  group.name <- paste(gl$other$ind.metrics$COMBINED_SEX,
                      gl$other$ind.metrics$COMBINED_SEX, "_",
                      gl$ind.names, sep = "")
  glmat <- as.matrix(gl)
  glmat[glmat==0] <- '2 2'
  glmat[glmat==1] <- '1 2'
  glmat[glmat==2] <- '1 1'
  glmat[is.na(glmat)] <- '0 0'
  df <- cbind(group.name, glmat)
  write.table(df, file = paste0(filename, ".txt", sep = ""), quote = FALSE,
              sep = " ", row.names = FALSE, col.names = FALSE)
}

res.rel <- list()
summ.rel <- data.frame(sex.group = c("FF", "FM", "MM"))
plot.data <- data.frame(pair.no = NA, ind1.id = NA, ind2.id = NA, group = NA,
                       condition = NA, measurement = NA, Site = NA)
for (i in 1:nlevels(gl$pop)) {
  print(i)
  gl.tmp <- gl[gl$pop == levels(gl$pop)[i],]
  gl.tmp <- dartR::gl.filter.callrate(gl.tmp, method = 'loc', threshold = 1,
                                     mono.rm = TRUE, plot = FALSE, verbose = 0)

  gl2rel(gl.tmp, filename = "relate")
  data <- related::readgenotypedata("relate.txt")
  outfile <- related::coancestry (data$gdata , lynchli = 1, lynchrd = 1,
                                quellert = 1, wang = 1, ritland = 1)
  res <- outfile$relatedness[!outfile$relatedness$group %in%
                            c("FFUU", "UUUU", "MMUU", "UUFF", "UUMM"),]
  res$group[res$group == "MMFF"] <- "FFMM"
  data_long <- gather(res, condition, measurement, 5:11, factor_key=TRUE)
  data_long$Site <- levels(gl$pop)[i]
  plot.data <- rbind(plot.data, data_long)
  summ <- dplyr::group_by(res, group) %>%
    dplyr::summarise(mean(ritland))
  colnames(summ) <- c("sex.group", levels(gl$pop)[i])
  summ.rel <- cbind(summ.rel, summ[,2])
  res.rel[[i]] <- res
}
plot.data <- plot.data[-1,]
save(res.rel, summ.rel, plot.data, file = "DArTcap_ALL_relatedness_sex_Site2.Rdata")

```

```

load("DARtcap_ALL_relatedness_sex_Site2.Rdata")
pop.levels <- c("Gulf of Mexico", "Western North Atlantic",
               "Mozambique", "Reunion", "Seychelles", "Arabian Sea", "Sri Lanka",
               "Australia", "Fiji")
plot.data$Site <- factor(plot.data$Site, levels = pop.levels)
plot.data <- plot.data[plot.data$condition == "ritland",]
plot <- ggplot2::ggplot(plot.data, ggplot2::aes(x = group,
                                                y = measurement,
                                                fill = group)) +
  ggplot2::geom_boxplot() +
  ggplot2::facet_wrap(Site~.) +
  ggplot2::labs(x = "Site", y = "Relatedness (Ritland 1996)")
print(plot)

```

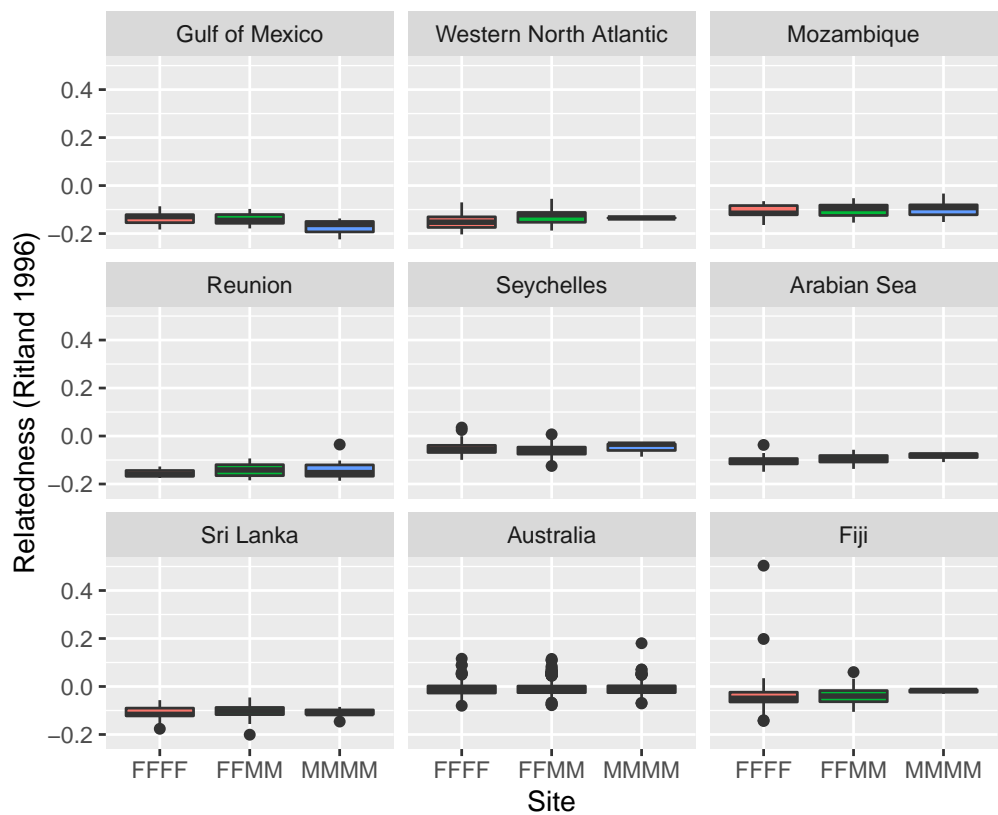

### 8.11.2.5 Relatedness test

```

knitr::kable(summ.rel, digits = 4,
             caption = "Relatedness between female and males according to Ritland (1996)") %>%
  kableExtra::kable_styling(full_width = FALSE, font_size = 5,
                             latex_options = c("hold_position"))

```

Table 30: Relatedness between female and males according to Ritland (1996)

| sex.group | Gulf of Mexico | Western North Atlantic | Mozambique | Reunion | Seychelles | Arabian Sea | Sri Lanka | Australia | Fiji    |
|-----------|----------------|------------------------|------------|---------|------------|-------------|-----------|-----------|---------|
| FF        | -0.1345        | -0.1476                | -0.1071    | -0.1541 | -0.0536    | -0.1026     | -0.1118   | -0.0115   | -0.0428 |
| FM        | -0.1397        | -0.1266                | -0.1030    | -0.1414 | -0.0612    | -0.0968     | -0.1053   | -0.0108   | -0.0410 |
| MM        | -0.1745        | -0.1349                | -0.0963    | -0.1383 | -0.0510    | -0.0838     | -0.1111   | -0.0107   | -0.0197 |

### 8.11.3 Individual-based tests by Region



```

gl <- BS.dartcap.gl

pop.levels <- c("E-PAC", "W-ATL", "E-ATL", "W-IO", "N-IO", "E-IO", "W-PAC",
               "E-IO/W-PAC", "Japan", "Fiji")
gl$pop <- factor(gl$other$ind.metrics$Region, levels = pop.levels)
gl$pop[gl$pop %in% c("E-IO", "W-PAC")] <- "E-IO/W-PAC"
pop.levels <- c("E-PAC", "W-ATL", "E-ATL", "W-IO", "N-IO", "E-IO/W-PAC",
               "Japan", "Fiji")
gl$pop <- factor(gl$pop, levels = pop.levels)
gl <- gl[order(gl$pop, gl$ind.names),]

gl$other$ind.metrics$`TL (mm)` <- as.integer(gl$other$ind.metrics$`TL (mm)`)
gl <- gl[(gl$other$ind.metrics$`TL (mm)` > 1500 &
         !is.na(gl$other$ind.metrics$`TL (mm)`)) | gl$pop == "Fiji",] #Because all Fiji samples w
gl <- gl[!gl$other$ind.metrics$Site %in% c("E-ATL", "Japan"),]
Pop <- gl$pop

table(gl$pop, gl$other$ind.metrics$COMBINED_SEX)

df <- as.data.frame(gl)
df[df == 0] <- 11
df[df == 1] <- 12
df[df == 2] <- 22
dat <- data.frame(as.character(Pop), df)
sex <- gl$other$ind.metrics$Sex
dat <- dat[sex != "U",]
sex <- sex[sex != "U"]
FST <- hierfstat::sexbias.test(dat, sex, nperm = 100, test = "FST",
                              alternative = "two.sided")
#for mean you need at least 2 individuals per group
FIS <- hierfstat::sexbias.test(dat, sex, nperm = 100, test = "FIS",
                              alternative = "two.sided")
#for mean you need at least 2 individuals per group
mAIC <- hierfstat::sexbias.test(dat, sex, nperm = 100, test = "mAIC",
                              alternative = "two.sided")
#for mean you need at least 2 individuals per group
vAIC <- hierfstat::sexbias.test(dat, sex, nperm = 100, test = "vAIC",
                              alternative = "two.sided")
#for mean you need at least 3 individuals per group

aic <- hierfstat::AIC(dat)
plot.data <- data.frame(sex, aic)
rownames(plot.data) <- rownames(dat)

save(FST, FIS, mAIC, vAIC, aic, plot.data,
     file = "DARtcap_ALL_Aic_sex_Regions_OnlyAdults.Rdata")

load("DARtcap_ALL_Aic_sex_Regions_OnlyAdults.Rdata")

print(FST)
print(FIS)
print(mAIC)
print(vAIC)

sex <- plot.data$sex
aic.F <- aic[sex == "F"]
aic.M <- aic[sex == "M"]

```

```

maic.F <- mean(aic.F, na.rm = TRUE)
maic.M <- mean(aic.M, na.rm = TRUE)
vaic.F <- var(aic.F, na.rm = TRUE)
vaic.M <- var(aic.M, na.rm = TRUE)

aic.plot <- ggplot2::ggplot() +
  ggplot2::geom_histogram(data = subset(plot.data, sex == "F"),
    ggplot2::aes(aic, fill = "F", y = ..count..)) +
  ggplot2::geom_histogram(data = subset(plot.data, sex == "M"),
    ggplot2::aes(aic, fill = "M", y = -..count..)) +
  ggplot2::geom_vline(ggplot2::aes(xintercept = maic.F), colour = "#E69F00") +
  ggplot2::geom_vline(ggplot2::aes(xintercept = maic.M), colour = "#56B4E9") +
  ggplot2::scale_fill_manual(values = c("#E69F00", "#56B4E9"),
    labels = c("Female", "Male")) +
  ggplot2::labs(x = "Corrected assignment index",
    y = "Number of individuals",
    fill = "Sex") +
  ggplot2::theme_minimal()
print(aic.plot)

```

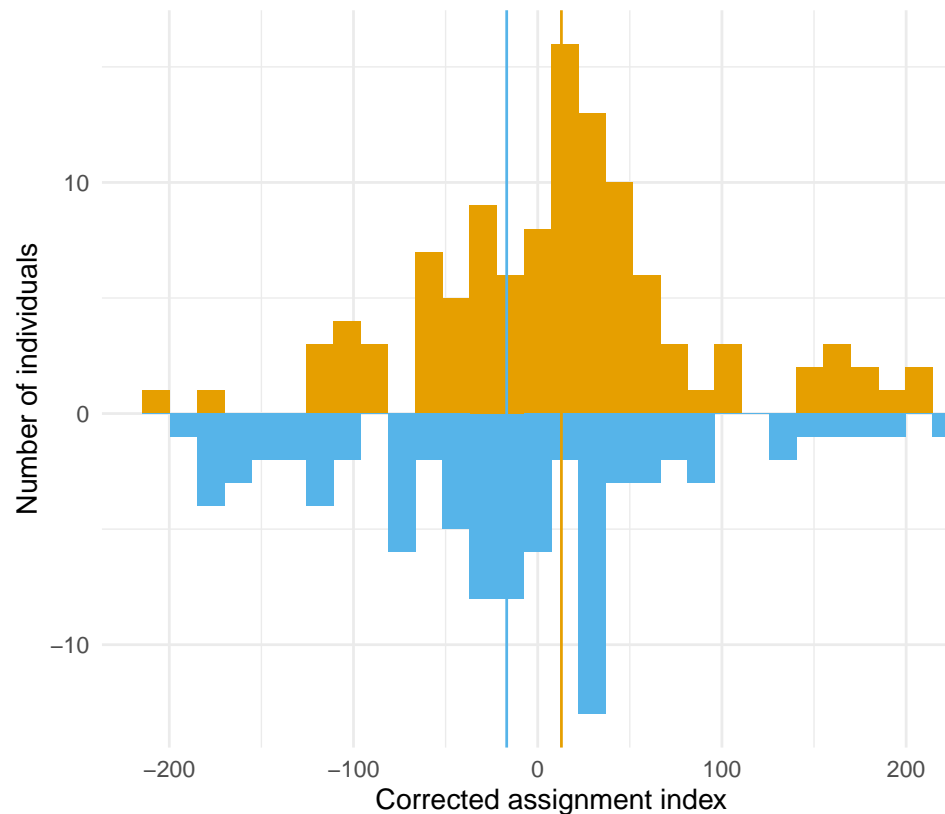

### 8.11.3.1 Individual assignment

```

region <- BS.dartcap.gl$other$ind.metrics$Region
region[region %in% c("E-IO", "W-PAC")] <- "E-IO/W-PAC"
df <- data.frame(INDIVIDUALS = BS.dartcap.gl$ind.names, pop = region)
test.data <- data.frame(INDIVIDUALS = rownames(plot.data), plot.data,
  stringsAsFactors = FALSE)
test.data %<>% dplyr::left_join(df, by = "INDIVIDUALS")
plot.data <- test.data
pop.levels <- c("W-ATL", "W-IO", "N-IO", "E-IO/W-PAC", "Fiji")
plot.data$pop <- factor(plot.data$pop, levels = pop.levels)

aic.plot <- ggplot2::ggplot() +

```

```

ggplot2::geom_histogram(data = subset(plot.data, sex == "F"),
                        ggplot2::aes(aic, fill = "F", y = ..count..),
                        binwidth = 7) +
ggplot2::geom_histogram(data = subset(plot.data, sex == "M"),
                        ggplot2::aes(aic, fill = "M", y = -..count..),
                        binwidth = 7) +
ggplot2::geom_hline(yintercept = 0) +
ggplot2::scale_fill_manual(values = c("#E69F00", "#56B4E9"),
                           labels = c("Female", "Male")) +
ggplot2::labs(x = "Corrected assignment index",
              y = "Number of individuals",
              fill = "") +
ggplot2::facet_grid(pop~., scales = "free_y") +
ggplot2::theme_minimal() +
ggplot2::theme(
  axis.text.x = ggplot2::element_text(size = 10, angle = 0, face = "bold"),
  axis.text.y = ggplot2::element_text(size = 10, angle = 0, face = "bold"),
  axis.title = ggplot2::element_text(size = 15),
  legend.text = ggplot2::element_text(hjust = 0, size = 15),
  legend.title = ggplot2::element_text(hjust = 0, size = 15),
  strip.text.y = element_text(angle = 0, size = 10)
)
print(aic.plot)

```

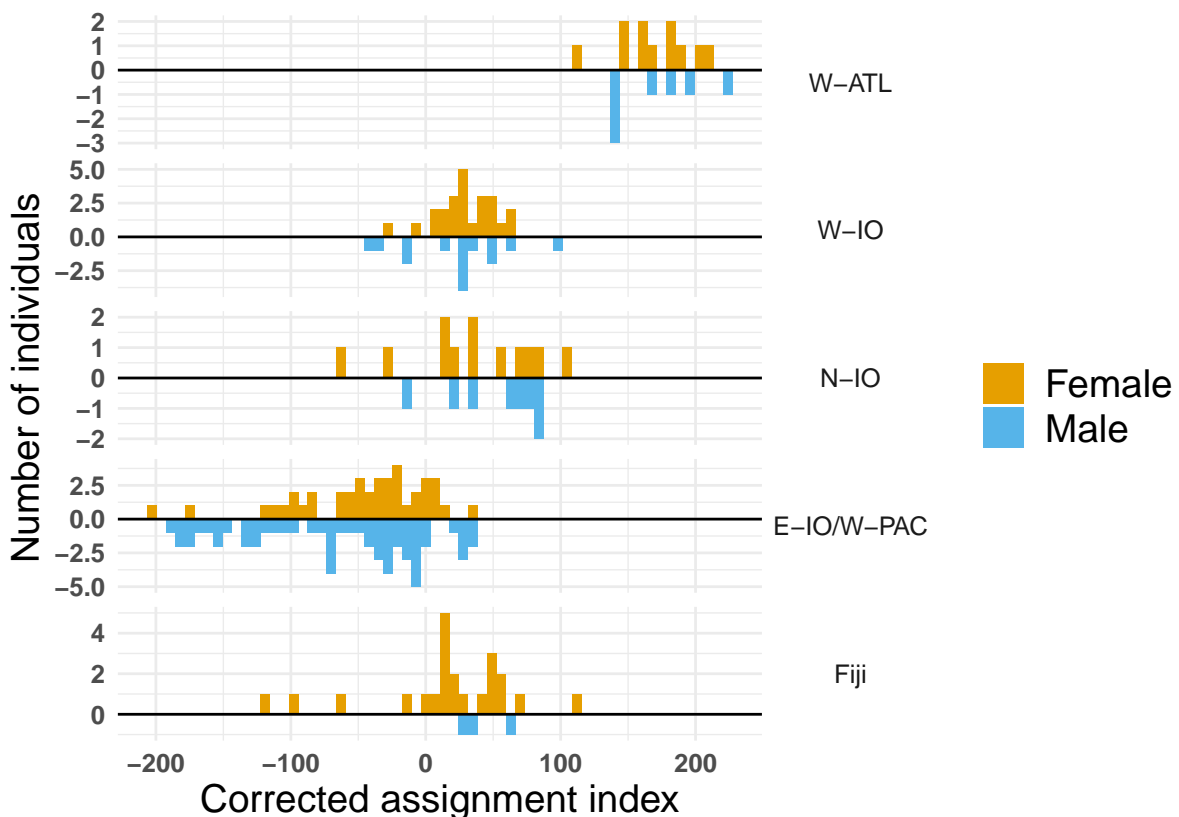

```

ggplot2::ggsave(plot = aic.plot, filename = "DARtcap_ALL_Aic_sex_Regions_OnlyAdults.png",
                width = 30, height = 15, units = "cm")

res <- plot.data[(plot.data$pop == "N-IO" & plot.data$aic < (-50) &
                 !is.na(plot.data$aic)) |
                (plot.data$pop == "E-IO/W-PAC" & plot.data$aic < (-200) &
                 !is.na(plot.data$aic))]

```

```

      (plot.data$pop == "Fiji" & plot.data$aic < (-50) &
        !is.na(plot.data$aic)), ]
knitr::kable(res, digits = 4,
  caption = "Individuals with low population assignment indices") %>%
  kableExtra::kable_styling(full_width = FALSE, font_size = 9,
    latex_options = c("hold_position"))
)

dat <- plot.data$aic[plot.data$sex=="F" & plot.data$pop=="Fiji"]
quantile(dat, 0.025)
boxplot(dat,
  ylab = "Aic",
  main = "Boxplot of Aic"
)

```

**Boxplot of Aic**

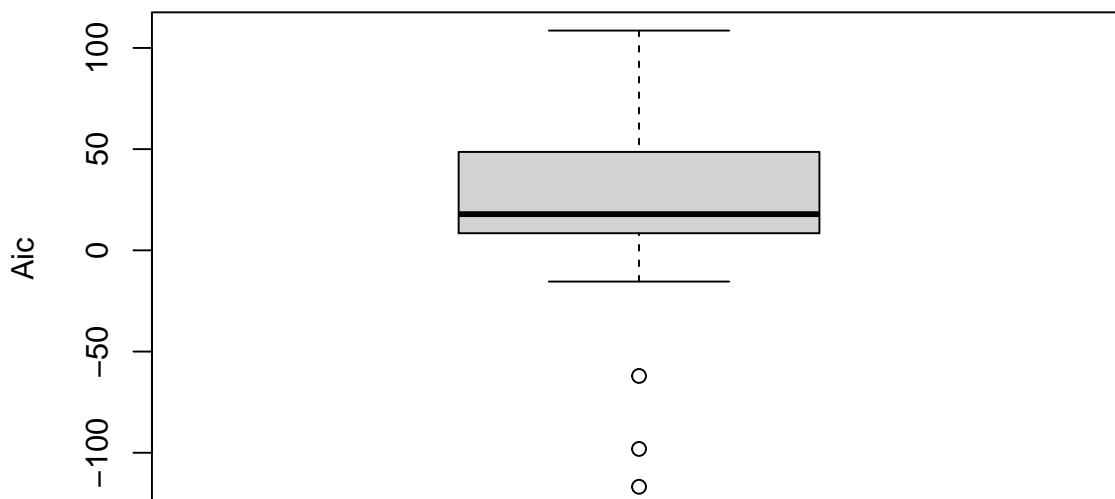

```
out <- boxplot.stats(dat)$out
```

```

## $call
## hierfstat::sexbias.test(dat = dat, sex = sex, nperm = 100, test = "FST",
##   alternative = "two.sided")
##
## $statistic
## [1] -0.02210322
##
## $p.value
## [1] 1
##
## $call
## hierfstat::sexbias.test(dat = dat, sex = sex, nperm = 100, test = "FIS",
##   alternative = "two.sided")

```

```
##
## $statistic
## [1] 0.01046105
##
## $p.value
## [1] 0.17
##
## $call
## hierfstat::sexbias.test(dat = dat, sex = sex, nperm = 100, test = "mAIC",
##   alternative = "two.sided")
##
## $statistic
## [1] 2.432244
##
## $p.value
## [1] 0.58
##
## $call
## hierfstat::sexbias.test(dat = dat, sex = sex, nperm = 100, test = "vAIC",
##   alternative = "two.sided")
##
## $statistic
## [1] 0.6944592
##
## $p.value
## [1] 0.05
```

Table 31: Individuals with low population assignment indices

|     | INDIVIDUALS   | sex | aic       | pop        |
|-----|---------------|-----|-----------|------------|
| 60  | CL-ARS012-F   | F   | -64.7406  | N-IO       |
| 149 | CLSH047-F     | F   | -204.4526 | E-IO/W-PAC |
| 175 | CL-FIJ005-F.1 | F   | -116.7981 | Fiji       |
| 188 | CL-FIJ021-F   | F   | -62.0468  | Fiji       |
| 189 | CL-FIJ022-F   | F   | -98.1071  | Fiji       |

```
##      2.5%
## -106.9853
```

```
strata <- BS.dartcap.gt@schemes$Region
strata[strata %in% c("E-IO", "W-PAC")] <- "E-IO/W-PAC"
names(strata) <- BS.dartcap.gt@schemes$INDIVIDUALS
strataG::setStrata(BS.dartcap.gt) <- strata
BS.dartcap.gt@schemes$`TL (mm)` <- as.integer(BS.dartcap.gt@schemes$`TL (mm)`)
gt.all.F <- BS.dartcap.gt[BS.dartcap.gt@schemes$COMBINED_SEX == "F" &
  (BS.dartcap.gt@schemes$`TL (mm)` > 1500 &
  !is.na(BS.dartcap.gt@schemes$`TL (mm)`)|
  BS.dartcap.gt@schemes$Site == "Fiji"),]
gt.all.M <- BS.dartcap.gt[BS.dartcap.gt@schemes$COMBINED_SEX == "M" &
  BS.dartcap.gt@schemes$`TL (mm)` > 1500 &
  (!is.na(BS.dartcap.gt@schemes$`TL (mm)`)|
  BS.dartcap.gt@schemes$Site == "Fiji"),]

Fst.all.region.F <-
  strataG::popStructTest(
    gt.all.F,
    nrep = 1000,
```

```

stats = c("fst", "fis"),
type = "pairwise",
keep.null = FALSE,
quietly = TRUE,
max.cores = parallel::detectCores() - 1,
write.output = FALSE
)
save(Fst.all.region.F, file = "DARtcap_ALL_Fst_sex_Region.Rdata")
Fst.all.region.M <-
  strataG::popStructTest(
    gt.all.M,
    nrep = 1000,
    stats = c("fst", "fis"),
    type = "pairwise",
    keep.null = FALSE,
    quietly = TRUE,
    max.cores = parallel::detectCores() - 1,
    write.output = FALSE
  )
save(Fst.all.region.F, Fst.all.region.M,
      file = "DARtcap_ALL_Fst_sex_Region.Rdata")

```

```

load("DARtcap_ALL_Fst_sex_Region.Rdata")
dim(Fst.all.region.F$pairwise$result) #91 8
dim(Fst.all.region.M$pairwise$result) #66 8

names.1 <- paste0(Fst.all.region.F$pairwise$result$strata.1, "_",
                  Fst.all.region.F$pairwise$result$strata.2)
names.2 <- paste0(Fst.all.region.M$pairwise$result$strata.1, "_",
                  Fst.all.region.M$pairwise$result$strata.2)

result.1 <- Fst.all.region.F$pairwise$result
result.1$names.comb <- names.1
result.2 <- Fst.all.region.M$pairwise$result
result.2$names.comb <- names.2

data <- left_join(result.1, result.2, by = "names.comb" )

pwFst.FM <- data[,c(1:6, 12:15)]
colnames(pwFst.FM) <- c("strata.1", "strata.2", "n.auDNA.F.1", "n.auDNA.F.2",
                      "Fst.auDNA.F", "Fst.auDNA.F.Pval",
                      "n.auDNA.M.1", "n.auDNA.M.2", "Fst.auDNA.M", "Fst.auDNA.M.Pval")
knitr::kable(pwFst.FM, digits = 4,
             caption = "Pairwise Fst between females and males for autosomal markers") %>%
  kableExtra::kable_styling(full_width = FALSE, font_size = 5,
                            latex_options = c("hold_position")) %>%
  kableExtra::landscape()

```

### 8.11.3.2 Fst test

```

## [1] 21 8
## [1] 21 8

```

Table 32: Pairwise Fst between females and males for autosomal markers

| strata.1   | strata.2 | n.auDNA.F.1 | n.auDNA.F.2 | Fst.auDNA.F | Fst.auDNA.F.Pval | n.auDNA.M.1 | n.auDNA.M.2 | Fst.auDNA.M | Fst.auDNA.M.Pval |
|------------|----------|-------------|-------------|-------------|------------------|-------------|-------------|-------------|------------------|
| E-IO/W-PAC | E-PAC    | 165         | 6           | NA          | NA               | 176         | 10          | NA          | NA               |
| E-IO/W-PAC | Fiji     | 165         | 11          | 0.0288      | 0.0010           | 176         | 7           | 0.0306      | 0.0010           |
| E-IO/W-PAC | Japan    | 165         | 2           | NA          | NA               | 176         | 2           | NA          | NA               |
| E-IO/W-PAC | N-IO     | 165         | 19          | 0.0005      | 0.2517           | 176         | 8           | 0.0020      | 0.1279           |
| E-IO/W-PAC | W-ATL    | 165         | 41          | 0.6392      | 0.0010           | 176         | 21          | 0.6365      | 0.0010           |
| E-IO/W-PAC | W-IO     | 165         | 31          | 0.0018      | 0.0010           | 176         | 13          | 0.0006      | 0.2807           |
| E-PAC      | Fiji     | 6           | 11          | NA          | NA               | 10          | 7           | 0.6720      | 0.0010           |
| E-PAC      | Japan    | 6           | 2           | 0.7197      | 0.0796           | 10          | 2           | NA          | NA               |
| E-PAC      | N-IO     | 6           | 19          | NA          | NA               | 10          | 8           | NA          | NA               |
| E-PAC      | W-ATL    | 6           | 41          | NA          | NA               | 10          | 21          | NA          | NA               |
| E-PAC      | W-IO     | 6           | 31          | NA          | NA               | 10          | 13          | NA          | NA               |
| Fiji       | Japan    | 11          | 2           | NA          | NA               | 7           | 2           | NA          | NA               |
| Fiji       | N-IO     | 11          | 19          | 0.0267      | 0.0010           | 7           | 8           | 0.0269      | 0.0010           |
| Fiji       | W-ATL    | 11          | 41          | 0.6604      | 0.0010           | 7           | 21          | 0.6535      | 0.0010           |
| Fiji       | W-IO     | 11          | 31          | 0.0276      | 0.0010           | 7           | 13          | 0.0258      | 0.0010           |
| Japan      | N-IO     | 2           | 19          | NA          | NA               | 2           | 8           | 0.0447      | 0.0320           |
| Japan      | W-ATL    | 2           | 41          | 0.6704      | 0.0492           | 2           | 21          | NA          | NA               |
| Japan      | W-IO     | 2           | 31          | NA          | NA               | 2           | 13          | 0.0363      | 0.0177           |
| N-IO       | W-ATL    | 19          | 41          | 0.6538      | 0.0010           | 8           | 21          | 0.6540      | 0.0010           |
| N-IO       | W-IO     | 19          | 31          | 0.0007      | 0.2827           | 8           | 13          | 0.0011      | 0.3407           |
| W-ATL      | W-IO     | 41          | 31          | 0.6499      | 0.0010           | 21          | 13          | 0.6549      | 0.0010           |

```

pwFis.FM <- data[,c(1:4,7:8, 12:13,16:17)]
colnames(pwFis.FM) <- c("strata.1", "strata.2", "n.auDNA.F.1", "n.auDNA.F.2",
                        "Fis.auDNA.F", "Fis.auDNA.F.Pval",
                        "n.auDNA.M.1", "n.auDNA.M.2", "Fis.auDNA.M", "Fis.auDNA.M.Pval")
knitr::kable(pwFis.FM, digits = 4,
             caption = "Pairwise Fis between females and males for autosomal markers") %>%
  kableExtra::kable_styling(full_width = FALSE, font_size = 5,
                            latex_options = c("hold_position")) %>%
  kableExtra::landscape()

```

### 8.11.3.3 Fis test



Table 33: Pairwise Fis between females and males for autosomal markers

| strata.1   | strata.2 | n.auDNA.F.1 | n.auDNA.F.2 | Fis.auDNA.F | Fis.auDNA.F.Pval | n.auDNA.M.1 | n.auDNA.M.2 | Fis.auDNA.M | Fis.auDNA.M.Pval |
|------------|----------|-------------|-------------|-------------|------------------|-------------|-------------|-------------|------------------|
| E-IO/W-PAC | E-PAC    | 165         | 6           | NA          | NA               | 176         | 10          | NA          | NA               |
| E-IO/W-PAC | Fiji     | 165         | 11          | -4.3618     | 0.9411           | 176         | 7           | -4.3394     | 0.5145           |
| E-IO/W-PAC | Japan    | 165         | 2           | NA          | NA               | 176         | 2           | NA          | NA               |
| E-IO/W-PAC | N-IO     | 165         | 19          | -3.9486     | 0.5804           | 176         | 8           | -4.4266     | 0.1439           |
| E-IO/W-PAC | W-ATL    | 165         | 41          | -1.8571     | 1.0000           | 176         | 21          | -2.2058     | 1.0000           |
| E-IO/W-PAC | W-IO     | 165         | 31          | -3.8246     | 0.4925           | 176         | 13          | -4.2056     | 0.8771           |
| E-PAC      | Fiji     | 6           | 11          | NA          | NA               | 10          | 7           | NA          | NA               |
| E-PAC      | Japan    | 6           | 2           | NA          | NA               | 10          | 2           | NA          | NA               |
| E-PAC      | N-IO     | 6           | 19          | NA          | NA               | 10          | 8           | NA          | NA               |
| E-PAC      | W-ATL    | 6           | 41          | NA          | NA               | 10          | 21          | NA          | NA               |
| E-PAC      | W-IO     | 6           | 31          | NA          | NA               | 10          | 13          | NA          | NA               |
| Fiji       | Japan    | 11          | 2           | NA          | NA               | 7           | 2           | NA          | NA               |
| Fiji       | N-IO     | 11          | 19          | -13.4680    | 1.0000           | 7           | 8           | -59.0989    | 1.0000           |
| Fiji       | W-ATL    | 11          | 41          | -9.5707     | 1.0000           | 7           | 21          | -18.4592    | 1.0000           |
| Fiji       | W-IO     | 11          | 31          | -11.5127    | 1.0000           | 7           | 13          | -30.2224    | 0.9910           |
| Japan      | N-IO     | 2           | 19          | NA          | NA               | 2           | 8           | NA          | NA               |
| Japan      | W-ATL    | 2           | 41          | NA          | NA               | 2           | 21          | NA          | NA               |
| Japan      | W-IO     | 2           | 31          | NA          | NA               | 2           | 13          | NA          | NA               |
| N-IO       | W-ATL    | 19          | 41          | -6.4767     | 1.0000           | 8           | 21          | -13.9027    | 1.0000           |
| N-IO       | W-IO     | 19          | 31          | -9.0011     | 0.4845           | 8           | 13          | -22.6698    | 0.0420           |
| W-ATL      | W-IO     | 41          | 31          | -5.5483     | 1.0000           | 21          | 13          | -10.8381    | 1.0000           |

```

gl <- BS.dartcap.gl
pop.levels <- c("E-PAC", "W-ATL", "E-ATL", "W-IO", "N-IO", "E-IO", "W-PAC",
              "E-IO/W-PAC", "Japan", "Fiji")
gl$pop <- factor(gl$other$ind.metrics$Region, levels = pop.levels)
gl$pop[gl$pop %in% c("E-IO", "W-PAC")] <- "E-IO/W-PAC"
pop.levels <- c("E-PAC", "W-ATL", "E-ATL", "W-IO", "N-IO", "E-IO/W-PAC",
              "Japan", "Fiji")
gl$pop <- factor(gl$pop, levels = pop.levels)
gl <- gl[order(gl$pop, gl$ind.names),]

gl$other$ind.metrics$`TL (mm)` <- as.integer(gl$other$ind.metrics$`TL (mm)`
gl <- gl[(gl$other$ind.metrics$`TL (mm)` > 1500 &
        !is.na(gl$other$ind.metrics$`TL (mm)`)) | gl$pop == "Fiji",] #Because all Fiji samples w
gl <- gl[!gl$other$ind.metrics$Site == "E-ATL",] #only 1 sample
gl$other$loc.metrics.flags$monomorphs <- FALSE
gl$other$loc.metrics.flags$CallRate <- FALSE

gl2rel <- function(gl, filename = "relate"){
  group.name <- paste(gl$other$ind.metrics$COMBINED_SEX,
                    gl$other$ind.metrics$COMBINED_SEX, "_",
                    gl$ind.names, sep = "")
  glmat <- as.matrix(gl)
  glmat[glmat==0] <- '2 2'
  glmat[glmat==1] <- '1 2'
  glmat[glmat==2] <- '1 1'
  glmat[is.na(glmat)] <- '0 0'
  df <- cbind(group.name, glmat)
  write.table(df, file = paste0(filename, ".txt", sep = ""), quote = FALSE,
             sep = " ", row.names = FALSE, col.names = FALSE)
}

res.rel <- list()
summ.rel <- data.frame(sex.group = c("FF", "FM", "MM"))
plot.data <- data.frame(pair.no = NA, ind1.id = NA, ind2.id = NA, group = NA,
                      condition = NA, measurement = NA, Site = NA)
for (i in 1:nlevels(gl$pop)) {
  print(i)
  gl.tmp <- gl[gl$pop == levels(gl$pop)[i],]
  gl.tmp <- dartR::gl.filter.callrate(gl.tmp, method = 'loc', threshold = 1,
                                    mono.rm = TRUE, plot = FALSE, verbose = 0)

  gl2rel(gl.tmp, filename = "relate")
  data <- related::readgenotypedata("relate.txt")
  outfile <- related::coancestry (data$gdata, lynchli = 1, lynchrd = 1,
                                quellert = 1, wang = 1, ritland = 1)
  res <- outfile$relatedness[!outfile$relatedness$group %in%
                            c("FFUU", "UUUU", "MMUU", "UUFF", "UUMM"),]
  res$group[res$group == "MMFF"] <- "FFMM"
  data_long <- gather(res, condition, measurement, 5:11, factor_key=TRUE)
  data_long$Site <- levels(gl$pop)[i]
  plot.data <- rbind(plot.data, data_long)
  summ <- dplyr::group_by(res, group) %>%
    dplyr::summarise(mean(ritland))
  colnames(summ) <- c("sex.group", levels(gl$pop)[i])
  summ.rel <- cbind(summ.rel, summ[,2])
}

```

```

res.rel[[i]] <- res
}
plot.data <- plot.data[-1,]
save(res.rel, summ.rel, plot.data,
      file = "DarTcap_ALL_relatedness_sex_Region.Rdata")

load("DarTcap_ALL_relatedness_sex_Region.Rdata")
pop.levels <- c("E-PAC", "W-ATL", "W-IO", "N-IO", "E-IO/W-PAC", "Japan", "Fiji")
plot.data$Site <- factor(plot.data$Site, levels = pop.levels)
plot.data <- plot.data[plot.data$condition == "ritland",]
plot <- ggplot2::ggplot(plot.data, ggplot2::aes(x = group, y = measurement,
                                                fill = group)) +
  ggplot2::geom_boxplot() +
  ggplot2::facet_wrap(Site~.) +
  ggplot2::labs(x = "Site", y = "Relatedness (Ritland 1996)")
print(plot)

```

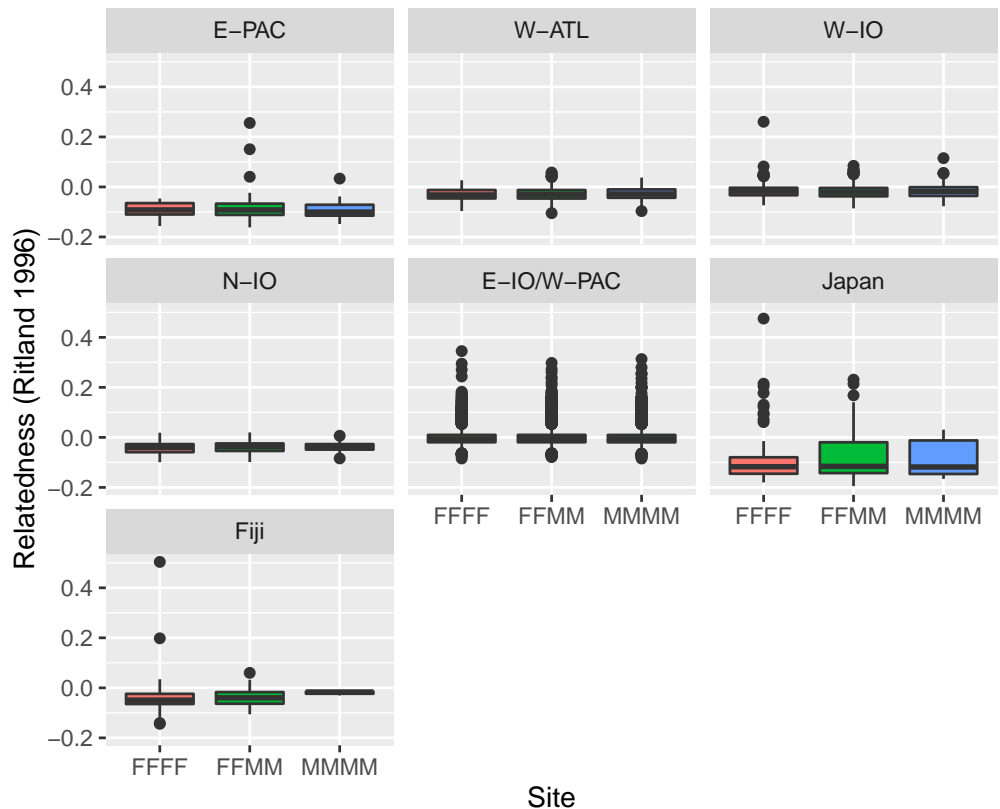

#### 8.11.3.4 Relatedness test

```

knitr::kable(summ.rel, digits = 2,
              caption = "Relatedness between female and males according to Ritland (1996)") %>%
  kableExtra::kable_styling(full_width = FALSE, font_size = 5,
                             latex_options = c("hold_position"))

```

Table 34: Relatedness between female and males according to Ritland (1996)

| sex.group | E-PAC | W-ATL | W-IO  | N-IO  | E-IO/W-PAC | Japan | Fiji  |
|-----------|-------|-------|-------|-------|------------|-------|-------|
| FF        | -0.09 | -0.03 | -0.02 | -0.04 | 0          | -0.07 | -0.04 |
| FM        | -0.08 | -0.03 | -0.02 | -0.04 | 0          | -0.06 | -0.04 |
| MM        | -0.09 | -0.03 | -0.02 | -0.04 | 0          | -0.08 | -0.02 |

## 9 DATA3: DArTcap - All data, subset Australia

### 9.1 Set strata

```
strata <- radiator::read_strata("Bull_shark_DArTcap_strata.tsv",
                              keep.two = FALSE)$strata %>%
  dplyr::filter(SpeciesID_genetic == "Carcharhinus leucas")
id.sub <- c(strata$INDIVIDUALS[strata$Site != "Australia"],
           sample(strata$INDIVIDUALS[strata$Site == "Australia"], size = 60))
strata <- strata[strata$INDIVIDUALS %in% id.sub,]
readr::write_tsv(strata, path = "Bull_shark_DArTcap_strata3_AUS_subset.tsv")
```

### 9.2 Filter data

1. Marker Reproducibility: 0.98
2. Individual missingness: 0.35
3. Individual Het - low: 0
4. Individual Het - high: 0.08
5. Individual total coverage - low: 10,000
6. Individual total coverage - high: 1,000,000
7. Marker MAC - low: 4
8. Marker coverage - low: 5
9. Marker coverage - high:90
10. Marker maximum missing proportion: 0.1
11. Marker snp position on locus: n
12. Max 3 SNPs per locus
13. 1 SNP per locus according to mac
14. no LD filter
15. Individual Het - low: 0.037
16. Individual Het - high: 0.1165
17. Duplicated individuals: 0.1
18. Filter on HWE: 2 pops, 0.001

```
dartcap.data <- "SEQ_SNPs_counts_0_Target_merge.csv"
strata <- "Bull_shark_DArTcap_strata3_AUS_subset.tsv"
BSsnp <- radiator::filter_rad(dartcap.data, strata,
                              parallel.core = 1)
BS.dartcap.sub.gds <- BSsnp$gds
BS.dartcap.sub.tidy <- BSsnp$output$tidy.data
print(BS.dartcap.sub.gds, expand = TRUE, all = TRUE, attribute = TRUE,
      attribute.trim = FALSE)
save(BS.dartcap.sub.tidy, file = "DArTcap_ALL_AUS_subset.Rdata")
```

Table 35:

| FILTERS                                    | VALUES       | BEFORE                       | BLACKLIST                 |
|--------------------------------------------|--------------|------------------------------|---------------------------|
| Filter DArT reproducibility                | 0.98         | 465 / 30 / 1 / 26335 / 37537 | 0 / 0 / 0 / 1043 / 2250   |
| Filter monomorphic markers                 | NA           | 465 / 30 / 1 / 25292 / 35287 | 0 / 0 / 0 / 12443 / 20404 |
| Filter markers in common                   | NA           | 465 / 30 / 1 / 12849 / 14883 | 0 / 0 / 0 / 5477 / 6377   |
| Filter individuals based on missingness    | 0.35         | 465 / 30 / 1 / 7372 / 8506   | 10 / 0 / 0 / 0 / 0        |
| Filter individuals based on heterozygosity | 0 0.05       | 455 / 30 / 1 / 7372 / 8506   | 14 / 0 / 0 / 0 / 0        |
| Filter individuals based on total coverage | 10000 1e+06  | 441 / 30 / 1 / 7372 / 8506   | 2 / 0 / 0 / 0 / 0         |
| Filter monomorphic markers                 | NA           | 439 / 30 / 1 / 7372 / 8506   | 0 / 0 / 0 / 1571 / 2036   |
| Filter MAC                                 | 4            | 439 / 30 / 1 / 5801 / 6470   | 0 / 0 / 0 / 3211 / 3699   |
| Filter coverage min / max                  | 5-90         | 439 / 30 / 1 / 2590 / 2771   | 0 / 0 / 0 / 611 / 633     |
| Filter genotyping                          | 0.1          | 439 / 30 / 1 / 1979 / 2138   | 0 / 0 / 0 / 94 / 107      |
| Filter SNPs position on the read           | all          | 439 / 30 / 1 / 1885 / 2031   | 0 / 0 / 0 / 0 / 0         |
| Filter markers snp number                  | 3            | 439 / 30 / 1 / 1885 / 2031   | 0 / 0 / 0 / 0 / 0         |
| Filter short ld                            | mac          | 439 / 30 / 1 / 1885 / 2031   | 0 / 0 / 0 / 0 / 146       |
| detect mixed genomes                       | 0.037 0.1165 | 439 / 30 / 1 / 1885 / 1885   | 11 / 0 / 0 / 0 / 0        |
| Filter monomorphic markers                 | NA           | 428 / 30 / 1 / 1885 / 1885   | 0 / 0 / 0 / 0 / 0         |
| detect duplicate genomes                   | 0.1          | 428 / 30 / 1 / 1885 / 1885   | 40 / 0 / 0 / 0 / 0        |
| Filter monomorphic markers                 | NA           | 388 / 30 / 1 / 1885 / 1885   | 0 / 0 / 0 / 0 / 0         |
| Filter HWE                                 | 20.001       | 388 / 30 / 1 / 1885 / 1885   | 0 / 0 / 0 / 7 / 7         |

### 9.2.1 Remove extra low and high heterozygous individuals

Because the average heterozygosity per sampling location is not even, certain individuals cannot be excluded without removing 'good' individuals.

```
rm <- c("CL-ARS021-F", "CL-GOM025-F.1", "CL-GOM012-F", "CL-SAF014-M", "CL-SAF002-F",
        "CL-BRZ038-U", "CLF003-F", "CL-GOM011-F", "CL-SAF015-F", "CL-SAF003-M",
        "CL-PNG005-U", "CLCR056-M", "CLCR047.1", "CLCR055-M", "CLCR066-M")

BS.dartcap.sub.tidy <- BS.dartcap.sub.tidy[!BS.dartcap.sub.tidy$INDIVIDUALS %in% rm,]
length(unique(BS.dartcap.sub.tidy$INDIVIDUALS)) # 382
```

### 9.3 Save data

```
Convert <- radiator::genomic_converter(BS.dartcap.sub.tidy,
                                       output = c("genlight", "stockr",
                                                  "pcadapt", "gtypes", "rubias"))

BS.dartcap.sub.gl <- Convert$genlight
BS.dartcap.sub.stkr <- Convert$stockr
BS.dartcap.sub.pc <- Convert$pcadapt
BS.dartcap.sub.gt <- Convert$gtypes
BS.dartcap.sub.rubias <- Convert$rubias

markers.meta <- radiator::extract_markers_metadata(BS.dartcap.sub.gds,
                                                  whitelist = TRUE)
individuals.meta <- radiator::extract_individuals_metadata(BS.dartcap.sub.gds,
                                                         whitelist = TRUE)
individuals.meta <- individuals.meta[individuals.meta$INDIVIDUALS %in%
                                     BS.dartcap.sub.gl$ind.names,]
BS.dartcap.sub.gl$other$ind.metrics <- individuals.meta
BS.dartcap.sub.gl$other$loc.metrics <- markers.meta
BS.dartcap.sub.gt@schemes <- individuals.meta

pop.levels <- c("Costa Rica", "Brazil", "Caribbean Sea", "Gulf of Mexico",
               "Western North Atlantic", "Sierra Leone", "South Africa",
               "Mozambique", "Reunion", "Seychelles", "Arabian Sea",
               "Sri Lanka", "Thailand", "Indonesia", "Papua New Guinea",
               "Fitzroy River", "Daly River", "Adelaide River", "Darwin Coastal",
               "South Alligator River", "East Alligator River", "Blue mud Bay",
               "Roper River", "Towns River", "Unknown", "Wenlock River", "Trinity inlet",
               "Clarence River", "Sydney Harbour", "Okinawa", "Urauchi River",
               "Fiji")
BS.dartcap.sub.gl$pop <- factor(BS.dartcap.sub.gl$other$ind.metrics$Site2,
                               levels = pop.levels)
BS.dartcap.sub.gl <- BS.dartcap.sub.gl[order(BS.dartcap.sub.gl$pop,
                                             BS.dartcap.sub.gl$ind.names),]
BS.dartcap.sub.gl <- BS.dartcap.sub.gl[order(BS.dartcap.sub.gl$pop,
                                             BS.dartcap.sub.gl$ind.names)]
BS.dartcap.sub.rubias$repunit <- factor(BS.dartcap.sub.rubias$repunit,
                                       levels = pop.levels)

save(BS.dartcap.sub.tidy, BS.dartcap.sub.gl, BS.dartcap.sub.stkr, BS.dartcap.sub.pc,
     BS.dartcap.sub.gt, BS.dartcap.sub.rubias,
     markers.meta, individuals.meta, file = "DarTcap_ALL_AUS_subset.Rdata")
```

## 9.4 Load data

```
load("DARtcap_ALL_AUS_subset.Rdata")

pop.levels <- c("Costa Rica" , "Brazil","Caribbean Sea", "Gulf of Mexico",
               "Western North Atlantic", "Sierra Leone", "South Africa",
               "Mozambique", "Reunion" , "Seychelles", "Arabian Sea", "Sri Lanka",
               "Thailand", "Indonesia", "Papua New Guinea" , "Australia",
               "Japan", "Fiji")

BS.dartcap.sub.gl$pop <- factor(BS.dartcap.sub.gl$other$ind.metrics$Site,
                               levels = pop.levels)
BS.dartcap.sub.gl <- BS.dartcap.sub.gl[order(BS.dartcap.sub.gl$pop,
                                             BS.dartcap.sub.gl$ind.names)]

unique(BS.dartcap.sub.tidy$POP_ID)
AUS <- c( "Daly_River","Wenlock_River","Sydney_Harbour","Clarence_River",
         "Adelaide_River","South_Alligator_River","Trinity_inlet",
         "East_Alligator_River","Town's_River","Darwin_Coastal","Unknown")
JAP <- c( "Urauchi_River", "Okinawa")
POP_ID <- as.character(BS.dartcap.sub.tidy$POP_ID)
POP_ID[POP_ID %in% AUS] <- "Australia"
POP_ID[POP_ID %in% JAP] <- "Japan"
pop.levels1 <- stringr::str_replace_all(pop.levels, " ", "_")
BS.dartcap.sub.tidy$POP_ID <- factor(POP_ID, levels = pop.levels1)
BS.dartcap.sub.tidy <- BS.dartcap.sub.tidy[order(BS.dartcap.sub.tidy$POP_ID,
                                                BS.dartcap.sub.tidy$INDIVIDUALS),]

adegenet::nInd(BS.dartcap.sub.gl) # 382
adegenet::nLoc(BS.dartcap.sub.gl) # 1878
summary(BS.dartcap.sub.gl$pop)
sum(duplicated(BS.dartcap.sub.gl$other$ind.metrics`Genetic code`))# 0 replicate left
sum(baits$CloneID %in% BS.dartcap.sub.gl$other$loc.metrics$LOCUS) #88

## [1] Fiji           Arabian_Sea         Sri_Lanka
## [4] Western_North_Atlantic Costa_Rica         Thailand
## [7] Mozambique         Gulf_of_Mexico    Reunion
## [10] Urauchi_River     South_Africa      Papua_New_Guinea
## [13] Sierra_Leone      Okinawa           Brazil
## [16] Seychelles        Caribbean_Sea     Indonesia
## [19] Daly_River        Wenlock_River     Sydney_Harbour
## [22] Clarence_River    Adelaide_River    South_Alligator_River
## [25] Trinity_inlet     East_Alligator_River Towns_River
## [28] Darwin_Coastal    Unknown
## 30 Levels: Fiji Arabian_Sea Sri_Lanka Western_North_Atlantic ... Unknown
## [1] 382
## [1] 1878
##           Costa Rica           Brazil           Caribbean Sea
##           15                52                2
##           Gulf of Mexico Western North Atlantic           Sierra Leone
##           40                8                1
##           South Africa           Mozambique           Reunion
##           23                11               28
##           Seychelles           Arabian Sea           Sri Lanka
##           36                15                12
##           Thailand           Indonesia           Papua New Guinea
##           5                4                8
##           Australia           Japan                Fiji
```

```
##                               54                               44                               24
## [1] 0
## [1] 88
```

## 9.5 Remove sex-linked markers

```
load("Sex-linked_marker_DArTcap.Rdata")
load("Sex_results.Rdata")
sum(bull_shark$sexy.summary$CLONE_ID %in% SLM$sexy.summary$CLONE_ID) #33
sum(SLM$sexy.summary$CLONE_ID %in% bull_shark$sexy.summary$CLONE_ID) #23
sex.markers <- unique(c(bull_shark$sexy.summary$CLONE_ID,
                       SLM$sexy.summary$CLONE_ID))

sum(BS.dartcap.sub.gl$loc.names %in% sex.markers) #29
locnames <- BS.dartcap.sub.gl$loc.names
BS.dartcap.sub.gl <- BS.dartcap.sub.gl[!locnames %in% sex.markers]
BS.dartcap.sub.gl$other$loc.metrics <- BS.dartcap.sub.gl$other$loc.metrics[
  !locnames %in% sex.markers,]

sum(sex.markers %in% unique(BS.dartcap.sub.tidy$LOCUS)) # 29
BS.dartcap.sub.tidy <- BS.dartcap.sub.tidy[!BS.dartcap.sub.tidy$LOCUS %in%
                                           sex.markers,]

locus.gt <- stringr::str_match(pattern = "__\\s*(.*?)\\s*__",
                              string = BS.dartcap.sub.gt@data$locus)[,2]
BS.dartcap.sub.gt <- BS.dartcap.sub.gt[!locus.gt %in% sex.markers, ,
                                       drop = TRUE]

locus.rubias <- stringr::str_match(pattern = "__\\s*(.*?)\\s*__",
                                   string = colnames(BS.dartcap.sub.rubias))[,2]
BS.dartcap.sub.rubias <- BS.dartcap.sub.rubias[!locus.rubias %in% sex.markers]

## [1] 33
## [1] 23
## [1] 29
## [1] 29
```

## 9.6 Genetic diversity

```
set.seed(124)
pop.levels <- c("Costa Rica", "Brazil", "Caribbean Sea", "Gulf of Mexico",
               "Western North Atlantic", "South Africa", "Mozambique", "Reunion",
               "Seychelles", "Arabian Sea", "Sri Lanka", "Thailand", "Indonesia",
               "Papua New Guinea", "Australia", "Japan", "Fiji")

gl <- BS.dartcap.sub.gl
gl <- gl[gl$pop != "Sierra Leone"] #only 1 sample
gl$pop <- factor(gl$other$ind.metrics$Site, levels = pop.levels)
gl <- gl[order(gl$pop, gl$ind.names)]

gl2gpop(gl, filename = "BS_dartcap_au_subset_genepop.txt")
bastat <- diveRsity::basicStats(infile = "BS_dartcap_au_subset_genepop.txt",
                              outfile = "BS_dartcap_au_subset_BasicStat_output.txt",
                              fis_ci = TRUE, ar_ci = TRUE, fis_boots = 1000,
                              ar_boots = 1000, mc_reps = 1000,
                              rarefaction = FALSE, ar_alpha = 0.05,
                              fis_alpha = 0.05)

length(bastat$main_tab) #17
```

```

gendiv <- data.frame(
  "Costa Rica" = bastat$main_tab[[1]]$overall,
  "Brazil" = bastat$main_tab[[2]]$overall,
  "Caribbean Sea" = bastat$main_tab[[3]]$overall,
  "Gulf of Mexico" = bastat$main_tab[[4]]$overall,
  "Western North Atlantic" = bastat$main_tab[[5]]$overall,
  "South Africa" = bastat$main_tab[[6]]$overall,
  "Mozambique" = bastat$main_tab[[7]]$overall,
  "Reunion" = bastat$main_tab[[8]]$overall,
  "Seychelles" = bastat$main_tab[[9]]$overall,
  "Arabian Sea" = bastat$main_tab[[10]]$overall,
  "Sri Lanka" = bastat$main_tab[[11]]$overall,
  "Thailand" = bastat$main_tab[[12]]$overall,
  "Indonesia" = bastat$main_tab[[13]]$overall,
  "Papua New Guinea" = bastat$main_tab[[14]]$overall,
  "Australia" = bastat$main_tab[[15]]$overall,
  "Japan" = bastat$main_tab[[16]]$overall,
  "Fiji" = bastat$main_tab[[17]]$overall,
  check.names = FALSE)
row.names(gendiv) <- rownames(bastat$main_tab[[1]])

df <- as.data.frame(g1)
df[df == "0"] <- "11"
df[df == "1"] <- "12"
df[df == "2"] <- "22"
gen.gi <- adegenet::df2genind(df, ploidy = 2, ncode = 2, pop = g1$pop)
ris_basic <- hierfstat::basic.stats(gen.gi)
fis.hierfstat <- apply(ris_basic$Fis, 2, mean, na.rm=T)
fis.CI <- hierfstat::boot.ppfis(gen.gi, nboot = 1000, quant = c(0.025,0.975),
                             diploid = TRUE,dig = 4)
df <- data.frame(fis.hierfstat,fis.CI.low = fis.CI$fis.ci[,1],
                fis.CI.high = fis.CI$fis.ci[,2])
df <- as.data.frame(t(df))
gendiv <- rbind(gendiv, df)

readr::write_tsv(gendiv, path = "DARtcap_aus_subset_gendiv.txt")
save(gendiv, file = "DARtcap_aus_subset_gendiv.Rdata")

load("DARtcap_aus_subset_gendiv.Rdata")
shortnames <- c("COR", "BRZ", "CAR", "GOM", "WNA", "SAF", "MOZ", "RUN",
               "SEY", "ARS", "SRL", "TAI", "IND", "PNG", "AUS", "JAP", "FIJ")
knitr::kable(gendiv, col.names = shortnames, digits = 4, caption = "") %>%
  kableExtra::kable_styling(full_width = FALSE, font_size = 5,
                             latex_options = c("hold_position")) %>%
  kableExtra::landscape()

```



Table 36:

|               | COR     | BRZ     | CAR     | GOM     | WNA     | SAF     | MOZ     | RUN     | SEY     | ARS     | SRL     | TAI     | IND     | PNG     | AUS     | JAP     | FIJ     |
|---------------|---------|---------|---------|---------|---------|---------|---------|---------|---------|---------|---------|---------|---------|---------|---------|---------|---------|
| ar            | 1.0770  | 1.1230  | 1.0880  | 1.1140  | 1.1120  | 1.1640  | 1.1570  | 1.1670  | 1.1710  | 1.1690  | 1.1680  | 1.1690  | 1.1440  | 1.1620  | 1.1720  | 1.1700  | 1.1600  |
| size          | 14.8250 | 51.5410 | 1.9920  | 39.1040 | 7.9670  | 22.6290 | 10.7600 | 27.7700 | 35.7970 | 14.9280 | 11.9440 | 4.9830  | 3.9750  | 7.9570  | 53.7240 | 43.7640 | 23.4910 |
| obs_het       | 0.0440  | 0.0670  | 0.0630  | 0.0640  | 0.0640  | 0.0890  | 0.0870  | 0.0900  | 0.0920  | 0.0920  | 0.0950  | 0.1010  | 0.0890  | 0.0910  | 0.0910  | 0.0950  | 0.0870  |
| exp_het       | 0.0450  | 0.0680  | 0.0470  | 0.0650  | 0.0610  | 0.0930  | 0.0910  | 0.0930  | 0.0930  | 0.0920  | 0.0910  | 0.0890  | 0.0790  | 0.0880  | 0.0950  | 0.0930  | 0.0910  |
| uexp_het      | 0.0470  | 0.0690  | 0.0630  | 0.0660  | 0.0650  | 0.0950  | 0.0960  | 0.0940  | 0.0950  | 0.0960  | 0.0950  | 0.0990  | 0.0890  | 0.0940  | 0.0960  | 0.0940  | 0.0940  |
| fis           | 0.0090  | 0.0250  | -0.3240 | 0.0220  | -0.0520 | 0.0240  | 0.0240  | 0.0200  | 0.0150  | -0.0030 | -0.0270 | -0.1230 | -0.1440 | -0.0420 | 0.0250  | -0.0030 | 0.0290  |
| hwe_glb       | 1.0000  | 1.0000  | 1.0000  | 1.0000  | 1.0000  | 1.0000  | 1.0000  | 1.0000  | 1.0000  | 1.0000  | 1.0000  | 1.0000  | 1.0000  | 1.0000  | 1.0000  | 1.0000  | 1.0000  |
| hwe_hom       | 1.0000  | 1.0000  | 1.0000  | 1.0000  | 1.0000  | 1.0000  | 1.0000  | 1.0000  | 1.0000  | 1.0000  | 1.0000  | 1.0000  | 1.0000  | 1.0000  | 1.0000  | 1.0000  | 1.0000  |
| hwe_het       | 1.0000  | 1.0000  | 1.0000  | 1.0000  | 1.0000  | 1.0000  | 1.0000  | 1.0000  | 1.0000  | 1.0000  | 1.0000  | 1.0000  | 1.0000  | 1.0000  | 1.0000  | 1.0000  | 1.0000  |
| fis_lo        | -0.0470 | 0.0040  | -1.0000 | -0.0050 | -0.1620 | -0.0100 | -0.0590 | -0.0110 | -0.0110 | -0.0580 | -0.0980 | -0.3820 | -0.5790 | -0.1600 | 0.0080  | -0.0270 | -0.0060 |
| fis_hi        | 0.0050  | 0.0260  | -0.3240 | 0.0250  | -0.0600 | 0.0210  | 0.0160  | 0.0190  | 0.0140  | -0.0090 | -0.0370 | -0.1230 | -0.1440 | -0.0540 | 0.0280  | -0.0030 | 0.0300  |
| ar_lo         | 1.0330  | 1.1090  | 1.0580  | 1.0880  | 1.0570  | 1.0820  | 1.0490  | 1.0870  | 1.1570  | 1.0840  | 1.0840  | 1.0900  | 1.0730  | 1.0740  | 1.1530  | 1.1250  | 1.0800  |
| ar_hi         | 1.0890  | 1.1360  | 1.1160  | 1.1330  | 1.1270  | 1.1810  | 1.1830  | 1.1880  | 1.1880  | 1.1940  | 1.1980  | 1.1960  | 1.1800  | 1.1880  | 1.1920  | 1.1890  | 1.1840  |
| fis.hierfstat | 0.0418  | 0.0343  | -0.0841 | 0.0340  | 0.0101  | 0.0450  | 0.0681  | 0.0378  | 0.0282  | 0.0293  | 0.0139  | -0.0229 | -0.0180 | 0.0194  | 0.0344  | 0.0086  | 0.0500  |
| fis.CI.low    | 0.0200  | 0.0188  | -0.0760 | 0.0135  | -0.0139 | 0.0430  | 0.0631  | 0.0277  | 0.0175  | 0.0141  | -0.0234 | -0.0551 | -0.0484 | 0.0013  | 0.0304  | -0.0282 | 0.0526  |
| fis.CI.high   | 0.0898  | 0.0506  | 0.1036  | 0.0565  | 0.0637  | 0.0815  | 0.1264  | 0.0643  | 0.0486  | 0.0604  | 0.0306  | 0.0183  | 0.0466  | 0.0645  | 0.0588  | 0.0074  | 0.0929  |

### 9.6.1 Number of monomorphic markers per population

```
pop.levels <- c("Costa Rica" , "Brazil","Caribbean Sea","Gulf of Mexico",
               "Western North Atlantic","Sierra Leone", "South Africa",
               "Mozambique", "Reunion" , "Seychelles", "Arabian Sea",
               "Sri Lanka", "Thailand", "Indonesia", "Papua New Guinea" ,
               "Australia", "Japan", "Fiji")

monomorphics <- c()
for (i in 1:length(pop.levels)) {
  x <- BS.dartcap.sub.gl[BS.dartcap.sub.gl$pop == pop.levels[i]]
  x2 <- dartR::gl.filter.monomorphs(x, verbose = 0)
  locs <- adegenet::nLoc(x) - adegenet::nLoc(x2)
  monomorphics[i] <- locs
}
names(monomorphics) <- pop.levels
shortnames <- c("COR","BRZ", "CAR", "GOM", "WNA","SIL", "SAF", "MOZ", "RUN" ,
               "SEY", "ARS", "SRL", "TAI", "IND", "PNG" , "AUS", "JAP", "FIJ")
knitr::kable(t(as.table(monomorphics)), col.names = shortnames, digits = 4,
              caption = "") %>%
  kableExtra::kable_styling(full_width = FALSE,font_size = 5,
                             latex_options = c( "hold_position"))
```

Table 37:

| COR  | BRZ | CAR  | GOM | WNA  | SIL  | SAF | MOZ  | RUN | SEY | ARS | SRL  | TAI  | IND  | PNG  | AUS | JAP | FIJ |
|------|-----|------|-----|------|------|-----|------|-----|-----|-----|------|------|------|------|-----|-----|-----|
| 1335 | 812 | 1476 | 973 | 1270 | 1791 | 845 | 1082 | 813 | 741 | 969 | 1040 | 1294 | 1398 | 1175 | 627 | 831 | 929 |

### 9.6.2 Nucleotide diversity and inbreeding

```
pi.sum <- radiator::pi(
  data = BS.dartcap.sub.tidy,
  read.length = 70,
  parallel.core = parallel::detectCores() - 1,
  path.folder = NULL,
  verbose = TRUE
)

FIS.sum<- radiator::ibdg_fh(data = BS.dartcap.sub.tidy,
  path.folder = NULL, verbose = TRUE)

save(pi.sum, FIS.sum, file = "DARtCap_aus_subset_pi_FIS_Sites.Rdata")

load("DARtCap_aus_subset_pi_FIS_Sites.Rdata")
pi.sum$boxplot.pi
```

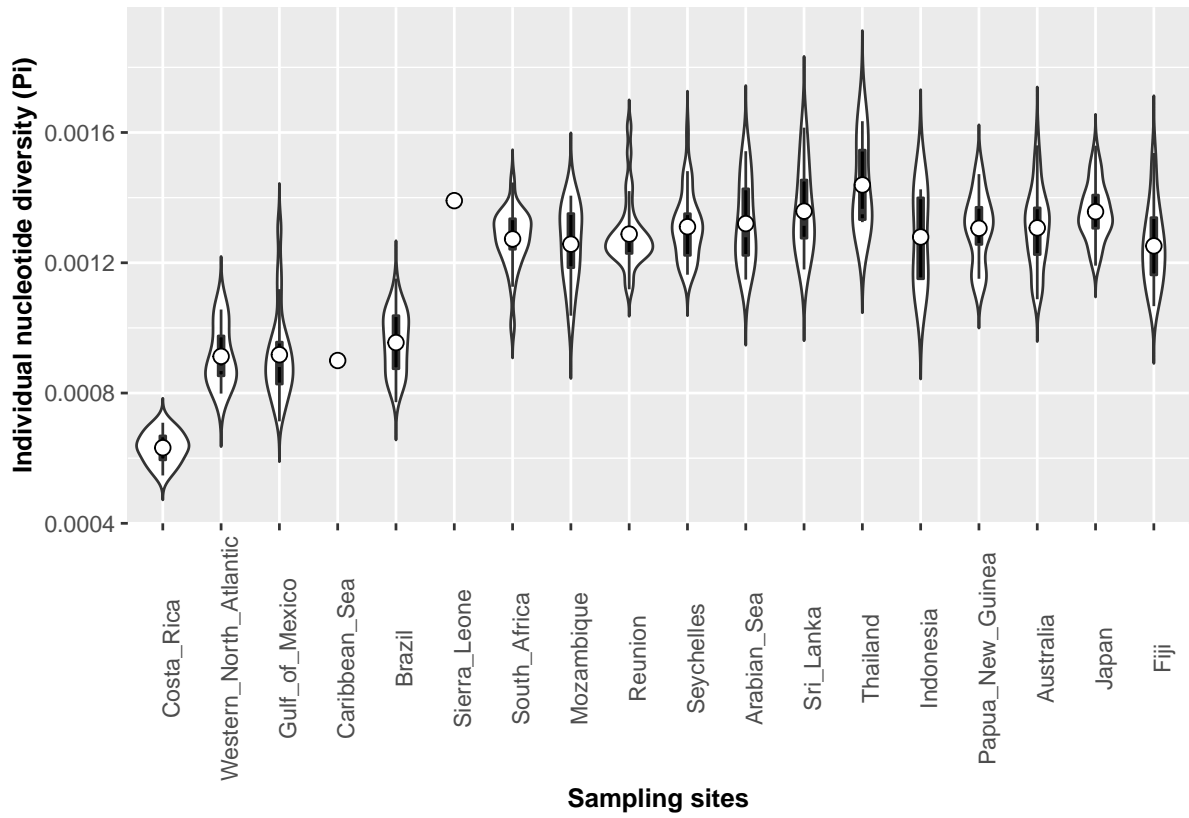

FIS.sum\$fh.box.plot

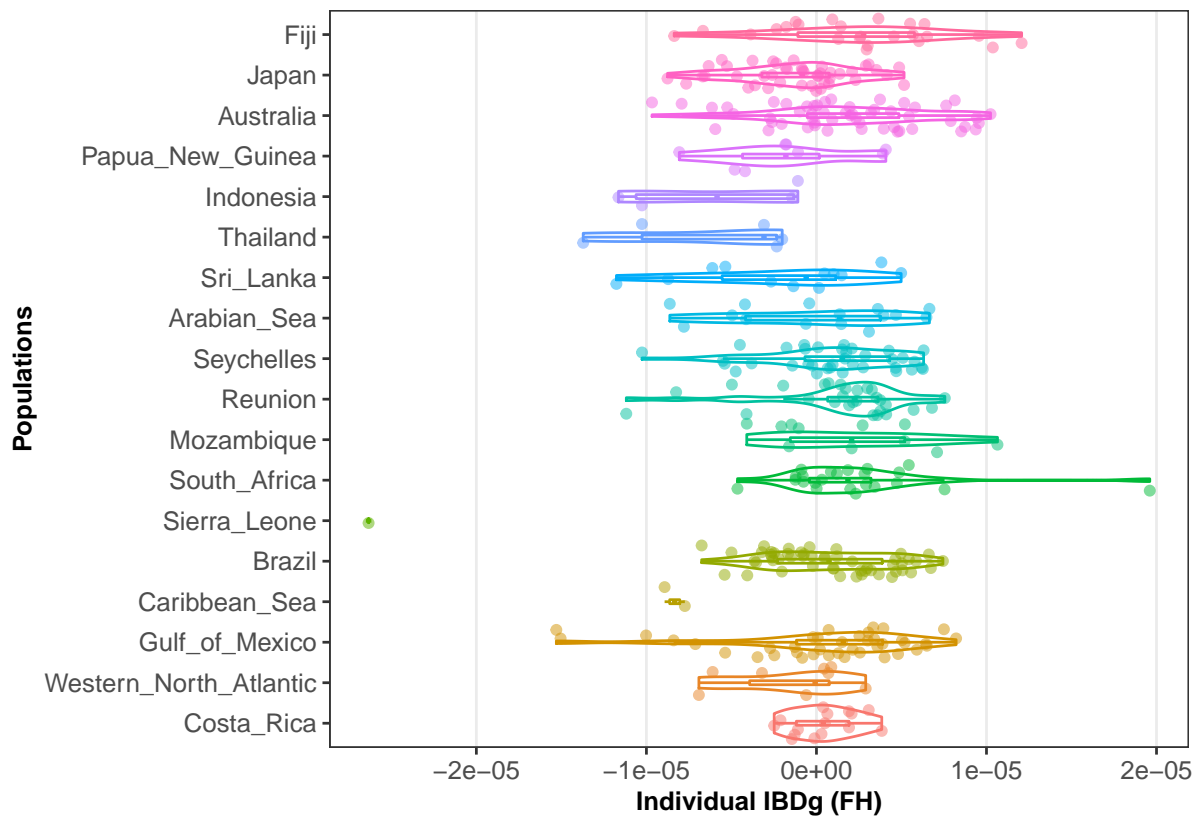

## 9.7 Genetic differentiation

```
Fst.gt <- strataG::popStructTest(
  BS.dartcap.sub.gt,
  nrep = 1000,
  stats = "all",
  type = "pairwise",
  keep.null = FALSE,
  quietly = TRUE,
  nb.cores = parallel::detectCores() - 1,
  write.output = FALSE
)
save(Fst.gt, file = "DARtcap_aus_subset_FST.Rdata")
readr::write_tsv(Fst.gt$pairwise$result, path = "DARtcap_aus_subset_FST.txt")

load("DARtcap_aus_subset_FST.Rdata")

kableExtra::kbl(Fst.gt$pairwise$result[order(Fst.gt$pairwise$result$Fst,
                                             decreasing = TRUE),
                                             -c(1:4)], digits = 4,
  caption = "Pairwise Fst for 1849 DARtcap loci between the all sites, but with a subset of Australi
  longtable = TRUE, booktabs = TRUE) %>%
kableExtra::kable_styling(full_width = FALSE, font_size = 5,
  latex_options = c("repeat_header", "hold_position")) %>%
kableExtra::landscape()
```

Table 38: Pairwise Fst for 1849 DARtCp loci between the all sites, but with a subset of Australia

|                                                   | Chi2       | Chi2.p.val | D      | D.p.val | Fis      | Fis.p.val | Fst    | Fst.p.val | F'st   | F'st.p.val | Gst     | Gst.p.val | G'st    | G'st.p.val | G'st   | G'st   |
|---------------------------------------------------|------------|------------|--------|---------|----------|-----------|--------|-----------|--------|------------|---------|-----------|---------|------------|--------|--------|
| Costa_Rica (15) v. Trinity_inlet (1)              | 8283.4461  | 0.0619     | 0.0204 | 0.0619  | 3.2680   | 1.0000    | 0.7414 | 1.0000    | 0.7793 | 1.0000     | -3.9814 | 1.0000    | -2.0069 | 1.0000     | 2.0086 | 1.0000 |
| Costa_Rica (15) v. Towns_River (2)                | 9222.5207  | 0.0060     | 0.0252 | 0.0060  | 11.5056  | 1.0000    | 0.7261 | 0.0240    | 0.7667 | 0.0240     | 2.0202  | 0.0423    | 1.7680  | 0.0423     | 1.2543 | 0.0000 |
| Costa_Rica (15) v. Sierra_Leone (1)               | 7661.4419  | 0.0579     | 0.0166 | 0.0579  | 3.2672   | 1.0000    | 0.7221 | 1.0000    | 0.7592 | 1.0000     | -3.4660 | 1.0000    | -1.7230 | 1.0000     | 2.1042 | 1.0000 |
| Costa_Rica (15) v. Darwin_Coastal (2)             | 9257.6375  | 0.0050     | 0.0249 | 0.0050  | 12.5054  | 1.0000    | 0.7219 | 0.0133    | 0.7619 | 0.0133     | 1.8793  | 0.0219    | 1.6654  | 0.0219     | 1.2311 | 0.0000 |
| Costa_Rica (15) v. Unknown (2)                    | 9189.7795  | 0.0090     | 0.0247 | 0.0090  | 12.3599  | 1.0000    | 0.7207 | 0.0256    | 0.7606 | 0.0256     | 1.9014  | 0.0435    | 1.6832  | 0.0435     | 1.2355 | 0.0000 |
| Adelaide_River (4) v. Costa_Rica (15)             | 10908.0732 | 0.0010     | 0.0266 | 0.0010  | -44.1032 | 1.0000    | 0.7088 | 0.0011    | 0.7613 | 0.0013     | 0.8711  | 0.0013    | 0.8955  | 0.0013     | 0.9441 | 0.0000 |
| Costa_Rica (15) v. Daly_River (3)                 | 10225.9312 | 0.0020     | 0.0261 | 0.0020  | 381.6588 | 0.0040    | 0.7084 | 0.0028    | 0.7505 | 0.0028     | 1.0169  | 0.0040    | 1.0135  | 0.0040     | 1.0067 | 0.0000 |
| Costa_Rica (15) v. Indonesia (4)                  | 10792.2218 | 0.0010     | 0.0264 | 0.0010  | NA       | NA        | 0.7064 | 0.0011    | 0.7496 | 0.0011     | NA      | NA        | NA      | NA         | NA     | NA     |
| Costa_Rica (15) v. Wenlock_River (4)              | 11032.6671 | 0.0010     | 0.0266 | 0.0010  | -27.0705 | 1.0000    | 0.6990 | 0.0011    | 0.7429 | 0.0011     | 0.8096  | 0.0013    | 0.8450  | 0.0013     | 0.9143 | 0.0000 |
| Costa_Rica (15) v. Thailand (5)                   | 11727.2773 | 0.0010     | 0.0272 | 0.0010  | -17.0550 | 1.0000    | 0.6913 | 0.0010    | 0.7365 | 0.0010     | 0.7263  | 0.0011    | 0.7748  | 0.0011     | 0.8696 | 0.0000 |
| Costa_Rica (15) v. East_Alligator_River (7)       | 12626.4320 | 0.0010     | 0.0259 | 0.0010  | -12.3826 | 1.0000    | 0.6815 | 0.0010    | 0.7280 | 0.0010     | 0.6599  | 0.0010    | 0.7160  | 0.0010     | 0.8289 | 0.0000 |
| Costa_Rica (15) v. Okinawa (9)                    | 13962.7470 | 0.0010     | 0.0280 | 0.0010  | -11.8202 | 1.0000    | 0.6776 | 0.0010    | 0.7260 | 0.0010     | 0.6408  | 0.0010    | 0.6999  | 0.0010     | 0.8171 | 0.0000 |
| Gulf_of_Mexico (40) v. Trinity_inlet (1)          | 16001.1132 | 0.0250     | 0.0239 | 0.0250  | 4.0949   | 1.0000    | 0.6769 | 1.0000    | 0.7254 | 1.0000     | 13.4579 | 1.0000    | 9.2853  | 1.0000     | 1.5731 | 1.0000 |
| Costa_Rica (15) v. Papua_New_Guinea (8)           | 13298.5700 | 0.0010     | 0.0267 | 0.0010  | -10.6383 | 1.0000    | 0.6758 | 0.0010    | 0.7241 | 0.0010     | 0.6319  | 0.0010    | 0.6918  | 0.0010     | 0.8112 | 0.0000 |
| Costa_Rica (15) v. Sydney_Harbour (8)             | 13439.5029 | 0.0010     | 0.0274 | 0.0010  | -10.4232 | 1.0000    | 0.6744 | 0.0010    | 0.7239 | 0.0010     | 0.6278  | 0.0010    | 0.6889  | 0.0010     | 0.8089 | 0.0000 |
| Trinity_inlet (1) v. Western_North_Atlantic (8)   | 5008.5600  | 0.1189     | 0.0234 | 0.1189  | 3.1212   | 1.0000    | 0.6741 | 0.5409    | 0.7283 | 1.0000     | -4.3408 | 1.0000    | -2.1394 | 1.0000     | 1.9397 | 1.0000 |
| Gulf_of_Mexico (40) v. Towns_River (2)            | 18358.0969 | 0.0030     | 0.0286 | 0.0030  | 58.2252  | 0.2747    | 0.6713 | 0.0067    | 0.7206 | 0.0067     | 1.0919  | 0.7963    | 1.0718  | 0.7963     | 1.0343 | 0.0000 |
| Caribbean_Sea (2) v. Trinity_inlet (1)            | 1969.5667  | 0.3467     | 0.0234 | 0.3467  | NA       | NA        | 0.6711 | 0.3467    | 0.7214 | 0.3467     | NA      | NA        | NA      | NA         | NA     | NA     |
| Adelaide_River (4) v. Gulf_of_Mexico (40)         | 22033.4331 | 0.0010     | 0.0306 | 0.0010  | -9.6500  | 0.9812    | 0.6703 | 0.0010    | 0.7479 | 0.0010     | 0.6557  | 0.0010    | 0.7170  | 0.0010     | 0.8291 | 0.0000 |
| Darwin_Coastal (2) v. Gulf_of_Mexico (40)         | 18729.0359 | 0.0010     | 0.0286 | 0.0010  | 137.1104 | 0.0030    | 0.6698 | 0.0023    | 0.7484 | 0.0030     | 1.0368  | 0.7508    | 1.0289  | 0.7508     | 1.0142 | 0.0000 |
| Gulf_of_Mexico (40) v. Unknown (2)                | 18394.7831 | 0.0010     | 0.0289 | 0.0010  | 102.7843 | 0.0032    | 0.6693 | 0.0024    | 0.7182 | 0.0024     | 1.0502  | 0.7331    | 1.0393  | 0.7331     | 1.0192 | 0.0000 |
| Gulf_of_Mexico (40) v. Indonesia (4)              | 21967.7890 | 0.0010     | 0.0305 | 0.0010  | NA       | NA        | 0.6687 | 0.0010    | 0.7187 | 0.0010     | NA      | NA        | NA      | NA         | NA     | NA     |
| Daly_River (3) v. Gulf_of_Mexico (40)             | 20742.6390 | 0.0010     | 0.0303 | 0.0010  | -12.9215 | 0.2460    | 0.6678 | 0.0012    | 0.7462 | 0.0012     | 0.7187  | 0.0012    | 0.7716  | 0.0012     | 0.8671 | 0.0000 |
| Costa_Rica (15) v. South_Alligator_River (10)     | 14341.6767 | 0.0010     | 0.0265 | 0.0010  | -9.4239  | 1.0000    | 0.6671 | 0.0010    | 0.7161 | 0.0010     | 0.6054  | 0.0010    | 0.6679  | 0.0010     | 0.7931 | 0.0000 |
| Gulf_of_Mexico (40) v. Wenlock_River (4)          | 22399.0465 | 0.0010     | 0.0303 | 0.0010  | -7.9557  | 0.4767    | 0.6655 | 0.0010    | 0.7159 | 0.0010     | 0.6189  | 0.0010    | 0.6859  | 0.0010     | 0.8060 | 0.0000 |
| Gulf_of_Mexico (40) v. Thailand (5)               | 23758.0033 | 0.0010     | 0.0308 | 0.0010  | -6.5729  | 0.9990    | 0.6639 | 0.0010    | 0.7148 | 0.0010     | 0.5763  | 0.0010    | 0.6484  | 0.0010     | 0.7769 | 0.0000 |
| Gulf_of_Mexico (40) v. Okinawa (9)                | 27391.1075 | 0.0010     | 0.0320 | 0.0010  | -5.5230  | 1.0000    | 0.6622 | 0.0010    | 0.7142 | 0.0010     | 0.5356  | 0.0010    | 0.6107  | 0.0010     | 0.7465 | 0.0000 |
| Towns_River (2) v. Western_North_Atlantic (8)     | 5814.0950  | 0.0290     | 0.0280 | 0.0290  | 11.2684  | 0.7018    | 0.6622 | 0.0420    | 0.7164 | 0.0588     | 1.8961  | 0.4077    | 1.6634  | 0.4077     | 1.2291 | 0.0000 |
| Brazil (52) v. Trinity_inlet (1)                  | 16194.6308 | 0.0180     | 0.0234 | 0.0180  | 4.6021   | 1.0000    | 0.6606 | 0.4615    | 0.7103 | 0.4615     | 4.5555  | 1.0000    | 3.4695  | 1.0000     | 1.4445 | 1.0000 |
| East_Alligator_River (7) v. Gulf_of_Mexico (40)   | 25167.0866 | 0.0010     | 0.0300 | 0.0010  | -5.5072  | 1.0000    | 0.6604 | 0.0010    | 0.7363 | 0.0010     | 0.5436  | 0.0010    | 0.6171  | 0.0010     | 0.7520 | 0.0000 |
| Gulf_of_Mexico (40) v. Sydney_Harbour (8)         | 26569.0852 | 0.0010     | 0.0312 | 0.0010  | -4.9426  | 1.0000    | 0.6593 | 0.0010    | 0.7118 | 0.0010     | 0.5261  | 0.0010    | 0.6025  | 0.0010     | 0.7395 | 0.0000 |
| Gulf_of_Mexico (40) v. Papua_New_Guinea (8)       | 26294.0411 | 0.0010     | 0.0305 | 0.0010  | -4.7993  | 1.0000    | 0.6589 | 0.0010    | 0.7107 | 0.0010     | 0.5264  | 0.0010    | 0.6018  | 0.0010     | 0.7391 | 0.0000 |
| Darwin_Coastal (2) v. Western_North_Atlantic (8)  | 5822.3231  | 0.0310     | 0.0278 | 0.0310  | 12.2432  | 0.3403    | 0.6580 | 0.0471    | 0.7125 | 0.0541     | 1.7761  | 0.3403    | 1.5768  | 0.3403     | 1.2078 | 0.0000 |
| Unknown (2) v. Western_North_Atlantic (8)         | 5787.2291  | 0.0170     | 0.0280 | 0.0170  | 11.9544  | 0.4007    | 0.6578 | 0.0231    | 0.7122 | 0.0304     | 1.8144  | 0.3596    | 1.6053  | 0.3596     | 1.2151 | 0.0000 |
| Costa_Rica (15) v. Mozambique (11)                | 14811.2507 | 0.0010     | 0.0265 | 0.0010  | -8.0933  | 1.0000    | 0.6574 | 0.0010    | 0.7168 | 0.0010     | 0.5824  | 0.0010    | 0.6474  | 0.0010     | 0.7772 | 0.0000 |
| Adelaide_River (4) v. Brazil (52)                 | 24872.8512 | 0.0010     | 0.0298 | 0.0010  | -6.8222  | 0.9886    | 0.6572 | 0.0010    | 0.7183 | 0.0010     | 0.6052  | 0.0010    | 0.6723  | 0.0010     | 0.7958 | 0.0000 |
| Brazil (52) v. Towns_River (2)                    | 19897.1581 | 0.0010     | 0.0279 | 0.0010  | -54.6719 | 0.3446    | 0.6568 | 0.0020    | 0.7070 | 0.0020     | 0.9245  | 0.0026    | 0.9399  | 0.0026     | 0.9688 | 0.0000 |
| Gulf_of_Mexico (40) v. South_Alligator_River (10) | 27892.8176 | 0.0010     | 0.0306 | 0.0010  | -4.5377  | 1.0000    | 0.6560 | 0.0010    | 0.7080 | 0.0010     | 0.5142  | 0.0010    | 0.5904  | 0.0010     | 0.7295 | 0.0000 |
| Brazil (52) v. Indonesia (4)                      | 24789.4679 | 0.0010     | 0.0297 | 0.0010  | NA       | NA        | 0.6554 | 0.0010    | 0.7061 | 0.0010     | NA      | NA        | NA      | NA         | NA     | NA     |
| Clarence_River (11) v. Costa_Rica (15)            | 15107.8708 | 0.0010     | 0.0272 | 0.0010  | -7.4903  | 1.0000    | 0.6553 | 0.0010    | 0.7111 | 0.0010     | 0.5719  | 0.0010    | 0.6390  | 0.0010     | 0.7703 | 0.0000 |
| Costa_Rica (15) v. Sri_Lanka (12)                 | 15422.5073 | 0.0010     | 0.0268 | 0.0010  | -7.7350  | 1.0000    | 0.6551 | 0.0010    | 0.7061 | 0.0010     | 0.5741  | 0.0010    | 0.6400  | 0.0010     | 0.7713 | 0.0000 |
| Brazil (52) v. Darwin_Coastal (2)                 | 20142.8088 | 0.0020     | 0.0278 | 0.0020  | -35.8236 | 0.1843    | 0.6549 | 0.0040    | 0.7049 | 0.0040     | 0.8898  | 0.0051    | 0.9120  | 0.0051     | 0.9534 | 0.0000 |
| Brazil (52) v. Unknown (2)                        | 19725.1591 | 0.0020     | 0.0281 | 0.0020  | -44.9478 | 0.1772    | 0.6545 | 0.0041    | 0.7045 | 0.0041     | 0.9093  | 0.0079    | 0.9277  | 0.0079     | 0.9621 | 0.0000 |
| Brazil (52) v. Daly_River (3)                     | 22999.2758 | 0.0010     | 0.0295 | 0.0010  | -8.4252  | 0.1928    | 0.6544 | 0.0011    | 0.7050 | 0.0011     | 0.6515  | 0.0012    | 0.7136  | 0.0012     | 0.8266 | 0.0000 |
| Brazil (52) v. Wenlock_River (4)                  | 25237.7951 | 0.0010     | 0.0295 | 0.0010  | -5.8267  | 0.2828    | 0.6529 | 0.0010    | 0.7039 | 0.0010     | 0.5741  | 0.0010    | 0.6456  | 0.0010     | 0.7749 | 0.0000 |
| Brazil (52) v. Thailand (5)                       | 27112.0193 | 0.0010     | 0.0301 | 0.0010  | -4.9947  | 0.9910    | 0.6522 | 0.0010    | 0.7037 | 0.0010     | 0.5410  | 0.0010    | 0.6159  | 0.0010     | 0.7508 | 0.0000 |
| Brazil (52) v. Okinawa (9)                        | 31644.5308 | 0.0010     | 0.0312 | 0.0010  | -4.4824  | 1.0000    | 0.6517 | 0.0010    | 0.7039 | 0.0010     | 0.5122  | 0.0010    | 0.5886  | 0.0010     | 0.7279 | 0.0000 |
| Adelaide_River (4) v. Western_North_Atlantic (8)  | 7323.2616  | 0.0050     | 0.0299 | 0.0050  | -35.6066 | 1.0000    | 0.6517 | 0.0050    | 0.7071 | 0.0050     | 0.8587  | 0.0050    | 0.8872  | 0.0050     | 0.9393 | 0.0000 |
| Gulf_of_Mexico (40) v. Mozambique (11)            | 28536.3039 | 0.0010     | 0.0305 | 0.0010  | -4.1008  | 1.0000    | 0.6515 | 0.0010    | 0.7092 | 0.0010     | 0.5020  | 0.0010    | 0.5793  | 0.0010     | 0.7199 | 0.0000 |
| Clarence_River (11) v. Gulf_of_Mexico (40)        | 29041.3696 | 0.0010     | 0.0310 | 0.0010  | -3.7833  | 1.0000    | 0.6506 | 0.0010    | 0.7260 | 0.0010     | 0.4939  | 0.0010    | 0.5729  | 0.0010     | 0.7141 | 0.0000 |
| Gulf_of_Mexico (40) v. Sri_Lanka (12)             | 29374.9490 | 0.0010     | 0.0305 | 0.0010  | -3.8221  | 1.0000    | 0.6502 | 0.0010    | 0.7032 | 0.0010     | 0.4957  | 0.0010    | 0.5734  | 0.0010     | 0.7148 | 0.0000 |
| Indonesia (4) v. Western_North_Atlantic (8)       | 7265.3114  | 0.0040     | 0.0296 | 0.0040  | NA       | NA        | 0.6500 | 0.0040    | 0.7052 | 0.0040     | NA      | NA        | NA      | NA         | NA     | NA     |
| Brazil (52) v. East_Alligator_River (7)           | 28932.2700 | 0.0010     | 0.0292 | 0.0010  | -4.3123  | 1.0000    | 0.6491 | 0.0010    | 0.7005 | 0.0010     | 0.5162  | 0.0010    | 0.5915  | 0.0010     | 0.7306 | 0.0000 |

Table 38: Pairwise Fst for 1849 DArTcap loci between the all sites, but with a subset of Australia  
(continued)

|                                                          | Chi2       | Chi2.p.val | D      | D.p.val | Fis       | Fis.p.val | Fst    | Fst.p.val | F'st   | F'st.p.val | Gst     | Gst.p.val | G'st    | G'st.p.val | G''st  | G''st.p.val |
|----------------------------------------------------------|------------|------------|--------|---------|-----------|-----------|--------|-----------|--------|------------|---------|-----------|---------|------------|--------|-------------|
| Brazil (52) v. Sydney_Harbour (8)                        | 30704.2647 | 0.0010     | 0.0304 | 0.0010  | -3.8210   | 1.0000    | 0.6489 | 0.0010    | 0.7016 | 0.0010     | 0.5006  | 0.0010    | 0.5783  | 0.0010     | 0.7190 | 0.0010      |
| Brazil (52) v. Papua_New_Guinea (8)                      | 30294.1036 | 0.0010     | 0.0297 | 0.0010  | -3.8839   | 1.0000    | 0.6482 | 0.0010    | 0.7003 | 0.0010     | 0.5033  | 0.0010    | 0.5800  | 0.0010     | 0.7206 | 0.0010      |
| Gulf_of_Mexico (40) v. Sierra_Leone (1)                  | 14355.5370 | 0.0200     | 0.0186 | 0.0200  | 4.0852    | 1.0000    | 0.6474 | 1.0000    | 0.6939 | 1.0000     | 42.8681 | 1.0000    | 29.3232 | 1.0000     | 1.6456 | 1.0000      |
| Arabian_Sea (15) v. Gulf_of_Mexico (40)                  | 31767.5391 | 0.0010     | 0.0307 | 0.0010  | -3.2755   | 1.0000    | 0.6469 | 0.0010    | 0.7208 | 0.0010     | 0.4856  | 0.0010    | 0.5644  | 0.0010     | 0.7068 | 0.0010      |
| Daly_River (3) v. Western_North_Atlantic (8)             | 6679.0770  | 0.0050     | 0.0295 | 0.0050  | -685.1037 | 1.0000    | 0.6468 | 0.0051    | 0.7028 | 0.0053     | 0.9917  | 0.0053    | 0.9935  | 0.0053     | 0.9967 | 0.0053      |
| Brazil (52) v. South_Alligator_River (10)                | 32317.7661 | 0.0010     | 0.0297 | 0.0010  | -3.5437   | 1.0000    | 0.6461 | 0.0010    | 0.6983 | 0.0010     | 0.4919  | 0.0010    | 0.5691  | 0.0010     | 0.7112 | 0.0010      |
| Gulf_of_Mexico (40) v. Urauchi_River (35)                | 45733.6541 | 0.0010     | 0.0335 | 0.0010  | -3.2182   | 1.0000    | 0.6458 | 0.0010    | 0.7037 | 0.0010     | 0.4911  | 0.0010    | 0.5709  | 0.0010     | 0.7122 | 0.0010      |
| Arabian_Sea (15) v. Costa_Rica (15)                      | 17106.4638 | 0.0010     | 0.0269 | 0.0010  | -6.3976   | 1.0000    | 0.6456 | 0.0010    | 0.7014 | 0.0010     | 0.5518  | 0.0010    | 0.6201  | 0.0010     | 0.7552 | 0.0010      |
| Fiji (24) v. Gulf_of_Mexico (40)                         | 37844.7634 | 0.0010     | 0.0320 | 0.0010  | -3.4626   | 1.0000    | 0.6451 | 0.0010    | 0.7173 | 0.0010     | 0.4884  | 0.0010    | 0.5674  | 0.0010     | 0.7094 | 0.0010      |
| Sierra_Leone (1) v. Western_North_Atlantic (8)           | 4475.4535  | 0.1109     | 0.0179 | 0.1109  | 3.1210    | 1.0000    | 0.6427 | 0.5337    | 0.6945 | 1.0000     | -3.6139 | 1.0000    | -1.7595 | 1.0000     | 2.0557 | 1.0000      |
| Brazil (52) v. Mozambique (11)                           | 33120.9672 | 0.0010     | 0.0297 | 0.0010  | -3.2204   | 1.0000    | 0.6425 | 0.0010    | 0.6992 | 0.0010     | 0.4814  | 0.0010    | 0.5596  | 0.0010     | 0.7027 | 0.0010      |
| Brazil (52) v. Clarence_River (11)                       | 33703.3157 | 0.0010     | 0.0301 | 0.0010  | -2.9623   | 1.0000    | 0.6418 | 0.0010    | 0.6951 | 0.0010     | 0.4739  | 0.0010    | 0.5535  | 0.0010     | 0.6971 | 0.0010      |
| Brazil (52) v. Sri_Lanka (12)                            | 33981.3894 | 0.0010     | 0.0297 | 0.0010  | -3.1417   | 1.0000    | 0.6412 | 0.0010    | 0.6942 | 0.0010     | 0.4774  | 0.0010    | 0.5557  | 0.0010     | 0.6993 | 0.0010      |
| Brazil (52) v. Urauchi_River (35)                        | 52029.7382 | 0.0010     | 0.0326 | 0.0010  | -2.5235   | 1.0000    | 0.6405 | 0.0010    | 0.6977 | 0.0010     | 0.4762  | 0.0010    | 0.5564  | 0.0010     | 0.6995 | 0.0010      |
| Caribbean_Sea (2) v. Sierra_Leone (1)                    | 1784.8167  | 0.3397     | 0.0178 | 0.3397  | NA        | NA        | 0.6403 | 0.3397    | 0.6886 | 0.3397     | NA      | NA        | NA      | NA         | NA     | NA          |
| Caribbean_Sea (2) v. Towns_River (2)                     | 2563.0048  | 0.3457     | 0.0281 | 0.3457  | NA        | NA        | 0.6394 | 0.3457    | 0.7010 | 0.1698     | NA      | NA        | NA      | NA         | NA     | NA          |
| Arabian_Sea (15) v. Brazil (52)                          | 36760.3836 | 0.0010     | 0.0299 | 0.0010  | -2.6437   | 1.0000    | 0.6391 | 0.0010    | 0.7002 | 0.0010     | 0.4686  | 0.0010    | 0.5479  | 0.0010     | 0.6921 | 0.0010      |
| Wenlock_River (4) v. Western_North_Atlantic (8)          | 7366.7088  | 0.0040     | 0.0296 | 0.0040  | -22.6825  | 1.0000    | 0.6389 | 0.0040    | 0.6957 | 0.0040     | 0.7985  | 0.0040    | 0.8384  | 0.0040     | 0.9101 | 0.0040      |
| Brazil (52) v. Fiji (24)                                 | 43520.2780 | 0.0010     | 0.0312 | 0.0010  | -2.7987   | 1.0000    | 0.6386 | 0.0010    | 0.7006 | 0.0010     | 0.4726  | 0.0010    | 0.5520  | 0.0010     | 0.6958 | 0.0010      |
| Gulf_of_Mexico (40) v. South_Africa (23)                 | 36690.5573 | 0.0010     | 0.0306 | 0.0010  | -2.5036   | 1.0000    | 0.6384 | 0.0010    | 0.7000 | 0.0010     | 0.4741  | 0.0010    | 0.5531  | 0.0010     | 0.6968 | 0.0010      |
| Costa_Rica (15) v. Fiji (24)                             | 21613.7417 | 0.0010     | 0.0280 | 0.0010  | -6.1858   | 1.0000    | 0.6369 | 0.0010    | 0.7048 | 0.0010     | 0.5462  | 0.0010    | 0.6151  | 0.0010     | 0.7511 | 0.0010      |
| Gulf_of_Mexico (40) v. Reunion (28)                      | 40078.5966 | 0.0010     | 0.0308 | 0.0010  | -2.4030   | 1.0000    | 0.6365 | 0.0010    | 0.6949 | 0.0010     | 0.4737  | 0.0010    | 0.5530  | 0.0010     | 0.6967 | 0.0010      |
| Thailand (5) v. Western_North_Atlantic (8)               | 8033.0419  | 0.0030     | 0.0301 | 0.0030  | -14.7546  | 1.0000    | 0.6351 | 0.0030    | 0.6924 | 0.0030     | 0.7200  | 0.0030    | 0.7731  | 0.0030     | 0.8681 | 0.0030      |
| Costa_Rica (15) v. Urauchi_River (35)                    | 27662.1809 | 0.0010     | 0.0291 | 0.0010  | -6.0830   | 1.0000    | 0.6343 | 0.0010    | 0.6924 | 0.0010     | 0.5466  | 0.0010    | 0.6163  | 0.0010     | 0.7519 | 0.0010      |
| Okinawa (9) v. Western_North_Atlantic (8)                | 10363.4737 | 0.0010     | 0.0312 | 0.0010  | -10.3435  | 1.0000    | 0.6338 | 0.0010    | 0.6907 | 0.0010     | 0.6395  | 0.0010    | 0.7033  | 0.0010     | 0.8190 | 0.0010      |
| East_Alligator_River (7) v. Western_North_Atlantic (8)   | 9094.2573  | 0.0010     | 0.0293 | 0.0010  | -10.6806  | 1.0000    | 0.6329 | 0.0010    | 0.6893 | 0.0010     | 0.6553  | 0.0010    | 0.7164  | 0.0010     | 0.8287 | 0.0010      |
| Brazil (52) v. South_Africa (23)                         | 42160.0679 | 0.0010     | 0.0297 | 0.0010  | -2.0854   | 1.0000    | 0.6321 | 0.0010    | 0.6922 | 0.0010     | 0.4600  | 0.0010    | 0.5392  | 0.0010     | 0.6844 | 0.0010      |
| Brazil (52) v. Reunion (28)                              | 45869.0575 | 0.0010     | 0.0300 | 0.0010  | -1.8295   | 1.0000    | 0.6308 | 0.0010    | 0.6883 | 0.0010     | 0.4592  | 0.0010    | 0.5386  | 0.0010     | 0.6838 | 0.0010      |
| Brazil (52) v. Sierra_Leone (1)                          | 14333.3910 | 0.0180     | 0.0181 | 0.0180  | 4.5739    | 1.0000    | 0.6300 | 1.0000    | 0.6775 | 1.0000     | 6.0027  | 1.0000    | 4.5323  | 1.0000     | 1.5044 | 1.0000      |
| Gulf_of_Mexico (40) v. Seychelles (36)                   | 44912.0898 | 0.0010     | 0.0309 | 0.0010  | -2.1106   | 1.0000    | 0.6300 | 0.0010    | 0.6884 | 0.0010     | 0.4691  | 0.0010    | 0.5488  | 0.0010     | 0.6928 | 0.0010      |
| Caribbean_Sea (2) v. Unknown (2)                         | 2542.7000  | 0.3526     | 0.0277 | 0.3526  | 3.7075    | 1.0000    | 0.6299 | 0.3526    | 0.6878 | 0.1858     | -7.0754 | 0.3526    | -3.9645 | 0.3526     | 1.8171 | 0.3526      |
| Costa_Rica (15) v. South_Africa (23)                     | 20816.9559 | 0.0010     | 0.0266 | 0.0010  | -5.1465   | 1.0000    | 0.6295 | 0.0010    | 0.6943 | 0.0010     | 0.5297  | 0.0010    | 0.5993  | 0.0010     | 0.7381 | 0.0010      |
| Papua_New_Guinea (8) v. Western_North_Atlantic (8)       | 9706.4549  | 0.0010     | 0.0298 | 0.0010  | -9.0767   | 1.0000    | 0.6284 | 0.0010    | 0.6854 | 0.0010     | 0.6257  | 0.0010    | 0.6910  | 0.0010     | 0.8099 | 0.0010      |
| Caribbean_Sea (2) v. Darwin_Coastal (2)                  | 2559.0238  | 0.3157     | 0.0278 | 0.3157  | 3.7461    | 1.0000    | 0.6267 | 0.3157    | 0.6847 | 0.1499     | -7.7041 | 1.0000    | -4.3619 | 1.0000     | 1.7998 | 0.3157      |
| Sydney_Harbour (8) v. Western_North_Atlantic (8)         | 9780.1098  | 0.0010     | 0.0305 | 0.0010  | -9.0582   | 1.0000    | 0.6264 | 0.0010    | 0.6842 | 0.0010     | 0.6239  | 0.0010    | 0.6901  | 0.0010     | 0.8092 | 0.0010      |
| Brazil (52) v. Seychelles (36)                           | 50969.9405 | 0.0010     | 0.0300 | 0.0010  | -1.5817   | 1.0000    | 0.6254 | 0.0010    | 0.6828 | 0.0010     | 0.4554  | 0.0010    | 0.5352  | 0.0010     | 0.6806 | 0.0010      |
| Costa_Rica (15) v. Reunion (28)                          | 23454.2807 | 0.0010     | 0.0269 | 0.0010  | -4.7007   | 1.0000    | 0.6251 | 0.0010    | 0.6845 | 0.0010     | 0.5245  | 0.0010    | 0.5947  | 0.0010     | 0.7341 | 0.0010      |
| South_Alligator_River (10) v. Western_North_Atlantic (8) | 10838.2134 | 0.0010     | 0.0298 | 0.0010  | -8.1197   | 1.0000    | 0.6247 | 0.0010    | 0.6819 | 0.0010     | 0.6019  | 0.0010    | 0.6698  | 0.0010     | 0.7939 | 0.0010      |
| Caribbean_Sea (2) v. Indonesia (4)                       | 3700.8168  | 0.6099     | 0.0295 | 0.6099  | NA        | NA        | 0.6214 | 0.0745    | 0.6826 | 0.1163     | NA      | NA        | NA      | NA         | NA     | NA          |
| Urauchi_River (35) v. Western_North_Atlantic (8)         | 24604.6728 | 0.0010     | 0.0327 | 0.0010  | -5.1041   | 1.0000    | 0.6198 | 0.0010    | 0.6790 | 0.0010     | 0.5422  | 0.0010    | 0.6179  | 0.0010     | 0.7522 | 0.0010      |
| Adelaide_River (4) v. Caribbean_Sea (2)                  | 3718.3094  | 0.0749     | 0.0296 | 0.0749  | 7.2692    | 1.0000    | 0.6189 | 0.0851    | 0.6763 | 0.0851     | 3.0806  | 0.0995    | 2.4719  | 0.0995     | 1.3607 | 0.0749      |
| Mozambique (11) v. Western_North_Atlantic (8)            | 11263.4552 | 0.0010     | 0.0297 | 0.0010  | -6.9854   | 1.0000    | 0.6164 | 0.0010    | 0.6744 | 0.0010     | 0.5790  | 0.0010    | 0.6495  | 0.0010     | 0.7780 | 0.0010      |
| Sri_Lanka (12) v. Western_North_Atlantic (8)             | 11868.0788 | 0.0010     | 0.0298 | 0.0010  | -6.5049   | 1.0000    | 0.6160 | 0.0010    | 0.6740 | 0.0010     | 0.5679  | 0.0010    | 0.6395  | 0.0010     | 0.7701 | 0.0010      |
| Costa_Rica (15) v. Seychelles (36)                       | 27353.9216 | 0.0010     | 0.0269 | 0.0010  | -4.0224   | 1.0000    | 0.6158 | 0.0010    | 0.6746 | 0.0010     | 0.5142  | 0.0010    | 0.5852  | 0.0010     | 0.7261 | 0.0010      |
| Fiji (24) v. Western_North_Atlantic (8)                  | 18191.8114 | 0.0010     | 0.0311 | 0.0010  | -5.3489   | 1.0000    | 0.6135 | 0.0010    | 0.6724 | 0.0010     | 0.5429  | 0.0010    | 0.6176  | 0.0010     | 0.7521 | 0.0010      |
| Clarence_River (11) v. Western_North_Atlantic (8)        | 11446.3472 | 0.0010     | 0.0302 | 0.0010  | -6.4380   | 1.0000    | 0.6127 | 0.0010    | 0.6717 | 0.0010     | 0.5666  | 0.0010    | 0.6393  | 0.0010     | 0.7698 | 0.0010      |
| Arabian_Sea (15) v. Western_North_Atlantic (8)           | 13534.4065 | 0.0010     | 0.0299 | 0.0010  | -5.4304   | 1.0000    | 0.6107 | 0.0010    | 0.6694 | 0.0010     | 0.5454  | 0.0010    | 0.6195  | 0.0010     | 0.7538 | 0.0010      |
| Caribbean_Sea (2) v. Okinawa (9)                         | 6348.1732  | 0.0180     | 0.0310 | 0.0180  | 15.4804   | 0.0216    | 0.6097 | 0.0212    | 0.6726 | 0.0212     | 1.4948  | 0.0216    | 1.3717  | 0.0216     | 1.1490 | 0.0216      |
| Caribbean_Sea (2) v. Urauchi_River (35)                  | 19161.2817 | 0.0010     | 0.0324 | 0.0010  | -55.0393  | 1.0000    | 0.6090 | 0.0014    | 0.6750 | 0.0018     | 0.9271  | 0.0019    | 0.9427  | 0.0019     | 0.9703 | 0.0018      |
| South_Africa (23) v. Western_North_Atlantic (8)          | 17466.8199 | 0.0010     | 0.0298 | 0.0010  | -4.1921   | 1.0000    | 0.6047 | 0.0010    | 0.6636 | 0.0010     | 0.5205  | 0.0010    | 0.5964  | 0.0010     | 0.7345 | 0.0010      |
| Reunion (28) v. Western_North_Atlantic (8)               | 20237.7524 | 0.0010     | 0.0301 | 0.0010  | -3.8775   | 1.0000    | 0.6046 | 0.0010    | 0.6637 | 0.0010     | 0.5155  | 0.0010    | 0.5919  | 0.0010     | 0.7308 | 0.0010      |
| Caribbean_Sea (2) v. East_Alligator_River (7)            | 5259.9809  | 0.0260     | 0.0293 | 0.0260  | 13.8073   | 0.0327    | 0.6029 | 0.0285    | 0.6651 | 0.0327     | 1.5621  | 0.0327    | 1.4218  | 0.0327     | 1.1646 | 0.0327      |

Table 38: Pairwise Fst for 1849 DArTcap loci between the all sites, but with a subset of Australia  
(continued)

|                                                 | Chi2       | Chi2.p.val | D      | D.p.val | Fis       | Fis.p.val | Fst    | Fst.p.val | F'st   | F'st.p.val | Gst      | Gst.p.val | G'st     | G'st.p.val | G''st  | G''st |
|-------------------------------------------------|------------|------------|--------|---------|-----------|-----------|--------|-----------|--------|------------|----------|-----------|----------|------------|--------|-------|
| Caribbean_Sea (2) v. Daly_River (3)             | 3149.1187  | 0.1209     | 0.0294 | 0.1209  | 5.8210    | 1.0000    | 0.6020 | 0.1209    | 0.6626 | 0.1209     | 5.2198   | 0.1315    | 3.8800   | 0.1315     | 1.4630 | 0     |
| Seychelles (36) v. Western_North_Atlantic (8)   | 24232.9745 | 0.0010     | 0.0301 | 0.0010  | -3.3147   | 1.0000    | 0.5999 | 0.0010    | 0.6595 | 0.0010     | 0.5041   | 0.0010    | 0.5815   | 0.0010     | 0.7218 | 0     |
| Caribbean_Sea (2) v. Papua_New_Guinea (8)       | 5760.8634  | 0.0260     | 0.0296 | 0.0260  | 17.1768   | 0.0308    | 0.5982 | 0.0295    | 0.6625 | 0.0295     | 1.4017   | 0.0308    | 1.3042   | 0.0308     | 1.1266 | 0     |
| Caribbean_Sea (2) v. South_Alligator_River (10) | 6781.6840  | 0.0160     | 0.0297 | 0.0160  | 22.4176   | 0.0210    | 0.5979 | 0.0183    | 0.6609 | 0.0194     | 1.2800   | 0.0210    | 1.2140   | 0.0210     | 1.0939 | 0     |
| Caribbean_Sea (2) v. Fiji (24)                  | 13143.0515 | 0.0050     | 0.0311 | 0.0050  | -91.8125  | 1.0000    | 0.5970 | 0.0100    | 0.6805 | 0.0133     | 0.9541   | 0.0135    | 0.9639   | 0.0135     | 0.9815 | 0     |
| Caribbean_Sea (2) v. Thailand (5)               | 4251.8777  | 0.0529     | 0.0302 | 0.0529  | 10.0058   | 0.5177    | 0.5966 | 0.0555    | 0.6593 | 0.0555     | 1.9743   | 0.0646    | 1.7099   | 0.0646     | 1.2387 | 0     |
| Caribbean_Sea (2) v. Wenlock_River (4)          | 3714.4194  | 0.0679     | 0.0295 | 0.0679  | 7.9460    | 0.3622    | 0.5952 | 0.0726    | 0.6574 | 0.0726     | 2.5621   | 0.0784    | 2.1141   | 0.0784     | 1.3128 | 0     |
| Caribbean_Sea (2) v. Sydney_Harbour (8)         | 5786.2777  | 0.0220     | 0.0302 | 0.0220  | 17.8923   | 0.0285    | 0.5929 | 0.0269    | 0.6595 | 0.0269     | 1.3780   | 0.0285    | 1.2858   | 0.0285     | 1.1202 | 0     |
| Caribbean_Sea (2) v. Sri_Lanka (12)             | 7665.6193  | 0.0200     | 0.0294 | 0.0200  | 53.9606   | 0.0251    | 0.5901 | 0.0234    | 0.6545 | 0.0242     | 1.0951   | 0.0251    | 1.0739   | 0.0251     | 1.0353 | 0     |
| Caribbean_Sea (2) v. Reunion (28)               | 15203.0711 | 0.0020     | 0.0297 | 0.0020  | -17.6781  | 1.0000    | 0.5883 | 0.0030    | 0.6575 | 0.0031     | 0.8191   | 0.0032    | 0.8550   | 0.0032     | 0.9203 | 0     |
| Arabian_Sea (15) v. Caribbean_Sea (2)           | 9164.2691  | 0.0070     | 0.0298 | 0.0070  | -220.7442 | 1.0000    | 0.5868 | 0.0080    | 0.6471 | 0.0080     | 0.9803   | 0.0085    | 0.9846   | 0.0085     | 0.9922 | 0     |
| Caribbean_Sea (2) v. Mozambique (11)            | 7144.3222  | 0.0120     | 0.0295 | 0.0120  | 35.0583   | 0.0319    | 0.5863 | 0.0244    | 0.6684 | 0.0284     | 1.1574   | 0.0319    | 1.1215   | 0.0319     | 1.0563 | 0     |
| Caribbean_Sea (2) v. Seychelles (36)            | 18801.7891 | 0.0030     | 0.0299 | 0.0030  | -11.6595  | 1.0000    | 0.5863 | 0.0040    | 0.6530 | 0.0043     | 0.7643   | 0.0044    | 0.8099   | 0.0044     | 0.8923 | 0     |
| Caribbean_Sea (2) v. South_Africa (23)          | 12645.9916 | 0.0040     | 0.0296 | 0.0040  | -23.8798  | 1.0000    | 0.5858 | 0.0054    | 0.6649 | 0.0059     | 0.8548   | 0.0060    | 0.8841   | 0.0060     | 0.9375 | 0     |
| Caribbean_Sea (2) v. Clarence_River (11)        | 7257.9437  | 0.0090     | 0.0300 | 0.0090  | 47.1972   | 0.0120    | 0.5831 | 0.0110    | 0.6491 | 0.0110     | 1.1102   | 0.0120    | 1.0851   | 0.0120     | 1.0403 | 0     |
| Caribbean_Sea (2) v. Costa_Rica (15)            | 2893.6819  | 0.0060     | 0.0032 | 0.0060  | 9.3903    | 1.0000    | 0.4308 | 0.0192    | 0.4601 | 0.0341     | -52.5077 | 1.0000    | -43.5363 | 1.0000     | 1.8647 | 1     |
| Costa_Rica (15) v. Western_North_Atlantic (8)   | 4105.2733  | 0.0010     | 0.0032 | 0.0010  | -30.8133  | 1.0000    | 0.3832 | 0.0010    | 0.4057 | 0.0010     | 0.6068   | 0.0010    | 0.6338   | 0.0010     | 0.7721 | 0     |
| Costa_Rica (15) v. Gulf_of_Mexico (40)          | 8142.6036  | 0.0010     | 0.0034 | 0.0010  | -11.1297  | 1.0000    | 0.3526 | 0.0010    | 0.3869 | 0.0010     | 0.3368   | 0.0010    | 0.3682   | 0.0010     | 0.5274 | 0     |
| Brazil (52) v. Costa_Rica (15)                  | 9169.3636  | 0.0010     | 0.0032 | 0.0010  | -8.1577   | 1.0000    | 0.3323 | 0.0010    | 0.3565 | 0.0010     | 0.2953   | 0.0010    | 0.3258   | 0.0010     | 0.4795 | 0     |
| Sierra_Leone (1) v. Urauchi_River (35)          | 3537.3346  | 0.0270     | 0.0019 | 0.0270  | 4.5406    | 1.0000    | 0.1875 | 1.0000    | 0.2084 | 1.0000     | -5.5054  | 1.0000    | -3.9614  | 1.0000     | 2.1012 | 1     |
| Okinawa (9) v. Sierra_Leone (1)                 | 1449.3241  | 0.1129     | 0.0016 | 0.1129  | 3.3895    | 1.0000    | 0.1572 | 1.0000    | 0.1730 | 1.0000     | -2.1137  | 1.0000    | -1.1208  | 1.0000     | 2.9042 | 1     |
| Indonesia (4) v. Sierra_Leone (1)               | 935.4608   | 0.2348     | 0.0013 | 0.2348  | NA        | NA        | 0.1556 | 0.5622    | 0.1711 | 0.5622     | NA       | NA        | NA       | NA         | NA     | NA    |
| Fiji (24) v. Sierra_Leone (1)                   | 2413.7037  | 0.0430     | 0.0016 | 0.0430  | 4.4327    | 1.0000    | 0.1373 | 1.0000    | 0.1514 | 1.0000     | -4.8777  | 1.0000    | -3.4768  | 1.0000     | 2.1545 | 1     |
| Adelaide_River (4) v. Sierra_Leone (1)          | 910.9826   | 0.2028     | 0.0014 | 0.2028  | 2.5969    | 1.0000    | 0.1325 | 1.0000    | 0.1460 | 1.0000     | -1.5533  | 1.0000    | -0.5169  | 1.0000     | 3.7415 | 1     |
| Sierra_Leone (1) v. Towns_River (2)             | 662.4667   | 0.3536     | 0.0012 | 0.3536  | NA        | NA        | 0.1288 | 0.3536    | 0.1453 | 0.3536     | NA       | NA        | NA       | NA         | NA     | NA    |
| East_Alligator_River (7) v. Sierra_Leone (1)    | 1156.7100  | 0.1359     | 0.0014 | 0.1359  | 3.2295    | 1.0000    | 0.1265 | 1.0000    | 0.1396 | 1.0000     | -2.0160  | 1.0000    | -1.0346  | 1.0000     | 3.0026 | 1     |
| Reunion (28) v. Sierra_Leone (1)                | 2602.7451  | 0.0360     | 0.0014 | 0.0360  | 4.9788    | 1.0000    | 0.1248 | 0.5538    | 0.1379 | 0.5538     | -12.5774 | 1.0000    | -9.7044  | 1.0000     | 1.9246 | 1     |
| Arabian_Sea (15) v. Sierra_Leone (1)            | 1781.1143  | 0.0639     | 0.0014 | 0.0639  | 4.1711    | 1.0000    | 0.1233 | 1.0000    | 0.1365 | 1.0000     | -3.9437  | 1.0000    | -2.7023  | 1.0000     | 2.2577 | 1     |
| Seychelles (36) v. Sierra_Leone (1)             | 3018.7283  | 0.0270     | 0.0014 | 0.0270  | 5.5605    | 1.0000    | 0.1219 | 1.0000    | 0.1347 | 1.0000     | 36.3786  | 1.0000    | 29.5263  | 1.0000     | 1.7632 | 1     |
| Sierra_Leone (1) v. Sydney_Harbour (8)          | 1283.9870  | 0.1209     | 0.0015 | 0.1209  | 3.4030    | 1.0000    | 0.1211 | 1.0000    | 0.1359 | 1.0000     | -2.2485  | 1.0000    | -1.2355  | 1.0000     | 2.7906 | 1     |
| Papua_New_Guinea (8) v. Sierra_Leone (1)        | 1248.3091  | 0.1189     | 0.0013 | 0.1189  | 3.3834    | 1.0000    | 0.1199 | 0.5219    | 0.1325 | 0.5219     | -2.1846  | 1.0000    | -1.1957  | 1.0000     | 2.8535 | 1     |
| Sierra_Leone (1) v. Sri_Lanka (12)              | 1556.1057  | 0.0719     | 0.0013 | 0.0719  | 3.8713    | 1.0000    | 0.1178 | 0.4444    | 0.1314 | 1.0000     | -2.9790  | 1.0000    | -1.9075  | 1.0000     | 2.4692 | 1     |
| Sierra_Leone (1) v. Thailand (5)                | 978.5387   | 0.1698     | 0.0015 | 0.1698  | 2.9111    | 1.0000    | 0.1168 | 1.0000    | 0.1305 | 1.0000     | -1.7844  | 1.0000    | -0.7697  | 1.0000     | 3.2560 | 1     |
| Clarence_River (11) v. Sierra_Leone (1)         | 1453.4856  | 0.0879     | 0.0015 | 0.0879  | 3.8156    | 1.0000    | 0.1139 | 0.5146    | 0.1265 | 0.5146     | -2.9214  | 1.0000    | -1.8332  | 1.0000     | 2.4746 | 1     |
| Sierra_Leone (1) v. South_Alligator_River (10)  | 1400.4489  | 0.0839     | 0.0013 | 0.0839  | 3.5773    | 1.0000    | 0.1138 | 0.3294    | 0.1266 | 0.5091     | -2.3774  | 1.0000    | -1.3837  | 1.0000     | 2.7306 | 1     |
| Darwin_Coastal (2) v. Sierra_Leone (1)          | 659.5417   | 0.3267     | 0.0011 | 0.3267  | NA        | NA        | 0.1104 | 0.3267    | 0.1220 | 0.3267     | NA       | NA        | NA       | NA         | NA     | NA    |
| Sierra_Leone (1) v. South_Africa (23)           | 2193.7608  | 0.0430     | 0.0013 | 0.0799  | 4.7410    | 1.0000    | 0.1085 | 1.0000    | 0.1239 | 1.0000     | -7.5959  | 1.0000    | -5.7079  | 1.0000     | 2.0170 | 1     |
| Mozambique (11) v. Sierra_Leone (1)             | 1497.0249  | 0.0939     | 0.0014 | 0.0939  | 3.7329    | 1.0000    | 0.1052 | 1.0000    | 0.1165 | 1.0000     | -2.7257  | 1.0000    | -1.6785  | 1.0000     | 2.5521 | 1     |
| Sierra_Leone (1) v. Wenlock_River (4)           | 897.8710   | 0.2128     | 0.0016 | 0.2128  | 2.6582    | 1.0000    | 0.1021 | 0.5285    | 0.1144 | 1.0000     | -1.6367  | 1.0000    | -0.5907  | 1.0000     | 3.4985 | 1     |
| Sierra_Leone (1) v. Unknown (2)                 | 634.6667   | 0.3347     | 0.0010 | 0.3347  | NA        | NA        | 0.0965 | 0.3347    | 0.1079 | 0.3347     | NA       | NA        | NA       | NA         | NA     | NA    |
| Daly_River (3) v. Sierra_Leone (1)              | 777.5623   | 0.2657     | 0.0014 | 0.2657  | 2.3085    | 1.0000    | 0.0859 | 1.0000    | 0.0956 | 1.0000     | -1.4345  | 1.0000    | -0.3314  | 1.0000     | 4.0639 | 1     |
| Fiji (24) v. Urauchi_River (35)                 | 4024.2388  | 0.0010     | 0.0009 | 0.0010  | -4.3109   | 1.0000    | 0.0717 | 0.0010    | 0.0794 | 0.0010     | 0.0750   | 0.0010    | 0.0889   | 0.0010     | 0.1525 | 0     |
| Trinity_inlet (1) v. Urauchi_River (35)         | 1666.6853  | 0.0260     | 0.0011 | 0.0260  | 4.4311    | 1.0000    | 0.0649 | 0.5000    | 0.0722 | 1.0000     | -3.5925  | 1.0000    | -2.5347  | 1.0000     | 2.3634 | 1     |
| Okinawa (9) v. Trinity_inlet (1)                | 950.1565   | 0.0839     | 0.0011 | 0.2008  | 3.3500    | 1.0000    | 0.0639 | 1.0000    | 0.0703 | 1.0000     | -1.8885  | 1.0000    | -0.9747  | 1.0000     | 3.2226 | 1     |
| Okinawa (9) v. Urauchi_River (35)               | 2432.4996  | 0.0010     | 0.0007 | 0.0010  | -6.4012   | 0.9920    | 0.0633 | 0.0010    | 0.0702 | 0.0010     | 0.1362   | 0.0010    | 0.1579   | 0.0010     | 0.2588 | 0     |
| Darwin_Coastal (2) v. Urauchi_River (35)        | 1785.5963  | 0.0030     | 0.0007 | 0.0320  | -148.9762 | 0.4298    | 0.0568 | 0.0115    | 0.0631 | 0.0129     | 0.9236   | 0.6125    | 0.9308   | 0.6080     | 0.9640 | 0     |
| Fiji (24) v. Okinawa (9)                        | 2148.5829  | 0.0010     | 0.0006 | 0.0010  | -6.0998   | 1.0000    | 0.0550 | 0.0010    | 0.0607 | 0.0010     | 0.1382   | 0.0010    | 0.1602   | 0.0010     | 0.2622 | 0     |
| Indonesia (4) v. Okinawa (9)                    | 1136.2430  | 0.0150     | 0.0006 | 0.0370  | NA        | NA        | 0.0508 | 0.0210    | 0.0562 | 0.0230     | NA       | NA        | NA       | NA         | NA     | NA    |
| Daly_River (3) v. Urauchi_River (35)            | 1910.5521  | 0.0010     | 0.0006 | 0.0050  | -12.7465  | 0.0509    | 0.0500 | 0.0022    | 0.0555 | 0.0022     | 0.4084   | 0.3905    | 0.4439   | 0.3319     | 0.6051 | 0     |
| Adelaide_River (4) v. Urauchi_River (35)        | 1905.4973  | 0.0010     | 0.0006 | 0.0040  | -9.6565   | 0.7655    | 0.0498 | 0.0041    | 0.0553 | 0.0041     | 0.2903   | 0.0194    | 0.3223   | 0.0194     | 0.4748 | 0     |
| Darwin_Coastal (2) v. Okinawa (9)               | 1025.9434  | 0.0400     | 0.0007 | 0.1648  | 15.7435   | 0.8638    | 0.0493 | 0.1257    | 0.0547 | 0.0805     | 3.0311   | 0.4817    | 2.7481   | 0.4817     | 1.4336 | 0     |
| Sydney_Harbour (8) v. Urauchi_River (35)        | 2307.4937  | 0.0010     | 0.0006 | 0.0010  | -6.0692   | 0.3447    | 0.0487 | 0.0010    | 0.0541 | 0.0010     | 0.1324   | 0.0020    | 0.1540   | 0.0010     | 0.2529 | 0     |





Table 38: Pairwise Fst for 1849 DarTcap loci between the all sites, but with a subset of Australia  
(continued)

|                                                        | Chi2      | Chi2.p.val | D      | D.p.val | Fis       | Fis.p.val | Fst    | Fst.p.val | F'st   | F'st.p.val | Gst     | Gst.p.val | G'st    | G'st.p.val | G'st   | G'st |
|--------------------------------------------------------|-----------|------------|--------|---------|-----------|-----------|--------|-----------|--------|------------|---------|-----------|---------|------------|--------|------|
| Indonesia (4) v. South_Alligator_River (10)            | 1014.3479 | 0.0290     | 0.0004 | 0.0629  | NA        | NA        | 0.0217 | 0.0250    | NA     | NA         | NA      | NA        | NA      | NA         | NA     | NA   |
| Towns_River (2) v. Trinity_inlet (1)                   | 514.2333  | 0.3367     | 0.0005 | 0.6633  | NA        | NA        | 0.0208 | 0.3367    | 0.0229 | 0.3367     | NA      | NA        | NA      | NA         | NA     | NA   |
| Fiji (24) v. Trinity_inlet (1)                         | 1235.3158 | 0.1319     | 0.0009 | 0.6324  | 4.3398    | 1.0000    | 0.0188 | 1.0000    | 0.0207 | 1.0000     | -3.4436 | 1.0000    | -2.4129 | 1.0000     | 2.3967 | 1    |
| Daly_River (3) v. East_Alligator_River (7)             | 892.7082  | 0.0320     | 0.0004 | 0.0370  | -516.5499 | 0.5186    | 0.0185 | 0.0292    | 0.0206 | 0.0292     | 0.9730  | 0.7704    | 0.9756  | 0.7674     | 0.9876 | 0    |
| Indonesia (4) v. Towns_River (2)                       | 677.8618  | 0.3946     | 0.0006 | 0.2687  | NA        | NA        | 0.0183 | 0.3357    | 0.0202 | 0.3357     | NA      | NA        | NA      | NA         | NA     | NA   |
| Darwin_Coastal (2) v. Thailand (5)                     | 769.5439  | 0.0589     | 0.0005 | 0.1578  | 10.2804   | 1.0000    | 0.0181 | 0.0615    | 0.0202 | 0.0615     | 9.2098  | 0.0723    | 7.8492  | 0.0723     | 1.6708 | 0    |
| Adelaide_River (4) v. Indonesia (4)                    | 779.0209  | 0.3726     | 0.0004 | 0.3686  | NA        | NA        | 0.0176 | 0.3726    | 0.0195 | 0.3626     | NA      | NA        | NA      | NA         | NA     | NA   |
| Indonesia (4) v. Thailand (5)                          | 843.8398  | 0.1399     | 0.0004 | 0.2048  | NA        | NA        | 0.0174 | 0.2008    | 0.0193 | 0.2008     | NA      | NA        | NA      | NA         | NA     | NA   |
| Fiji (24) v. Towns_River (2)                           | 1248.1029 | 0.0599     | 0.0006 | 0.0070  | 174.3806  | 0.4225    | 0.0173 | 0.0365    | 0.0191 | 0.0365     | 1.0735  | 0.3526    | 1.0664  | 0.3526     | 1.0320 | 0    |
| Indonesia (4) v. Mozambique (11)                       | 1008.3876 | 0.0889     | 0.0004 | 0.0729  | NA        | NA        | 0.0173 | 0.0412    | NA     | NA         | NA      | NA        | NA      | NA         | NA     | NA   |
| Indonesia (4) v. Reunion (28)                          | 1297.9224 | 0.0320     | 0.0003 | 0.0340  | NA        | NA        | 0.0170 | 0.0171    | NA     | NA         | NA      | NA        | NA      | NA         | NA     | NA   |
| Indonesia (4) v. Seychelles (36)                       | 1356.4138 | 0.0160     | 0.0003 | 0.0210  | NA        | NA        | 0.0157 | 0.0070    | NA     | NA         | NA      | NA        | NA      | NA         | NA     | NA   |
| Indonesia (4) v. Papua_New_Guinea (8)                  | 917.6883  | 0.1169     | 0.0003 | 0.1638  | NA        | NA        | 0.0157 | 0.1139    | NA     | NA         | NA      | NA        | NA      | NA         | NA     | NA   |
| Indonesia (4) v. Wenlock_River (4)                     | 811.3902  | 0.3497     | 0.0004 | 0.3227  | NA        | NA        | 0.0154 | 0.3497    | 0.0170 | 0.3497     | NA      | NA        | NA      | NA         | NA     | NA   |
| Fiji (24) v. Unknown (2)                               | 1339.3128 | 0.0220     | 0.0006 | 0.0370  | -617.4173 | 0.8660    | 0.0147 | 0.0660    | 0.0163 | 0.0698     | 0.9807  | 0.6340    | 0.9825  | 0.6340     | 0.9912 | 0    |
| Indonesia (4) v. Sri_Lanka (12)                        | 982.6080  | 0.2048     | 0.0003 | 0.0480  | NA        | NA        | 0.0139 | 0.0430    | NA     | NA         | NA      | NA        | NA      | NA         | NA     | NA   |
| Papua_New_Guinea (8) v. Trinity_inlet (1)              | 825.1671  | 0.2278     | 0.0007 | 0.6613  | 3.3463    | 1.0000    | 0.0133 | 0.5312    | 0.0147 | 0.5312     | -1.9354 | 1.0000    | -1.0364 | 1.0000     | 3.1770 | 1    |
| Arabian_Sea (15) v. Indonesia (4)                      | 1094.2521 | 0.1029     | 0.0003 | 0.0350  | NA        | NA        | 0.0132 | 0.0370    | 0.0146 | 0.0370     | NA      | NA        | NA      | NA         | NA     | NA   |
| East_Alligator_River (7) v. Wenlock_River (4)          | 922.8167  | 0.0240     | 0.0003 | 0.1538  | -25.4102  | 0.2238    | 0.0111 | 0.0470    | 0.0123 | 0.0470     | 0.5873  | 0.6334    | 0.6178  | 0.6104     | 0.7592 | 0    |
| Adelaide_River (4) v. South_Alligator_River (10)       | 941.5904  | 0.0380     | 0.0003 | 0.3856  | -20.2887  | 0.9076    | 0.0099 | 0.0300    | 0.0109 | 0.0301     | 0.5020  | 0.0502    | 0.5339  | 0.0502     | 0.6897 | 0    |
| Adelaide_River (4) v. Daly_River (3)                   | 770.7919  | 0.0899     | 0.0004 | 0.5734  | 18.8076   | 0.4316    | 0.0096 | 0.2048    | 0.0106 | 0.2048     | 2.5450  | 0.8242    | 2.3400  | 0.8242     | 1.3780 | 0    |
| Sydney_Harbour (8) v. Wenlock_River (4)                | 962.0491  | 0.0220     | 0.0003 | 0.0819  | -18.8519  | 0.3387    | 0.0094 | 0.0390    | 0.0104 | 0.0390     | 0.5013  | 0.4864    | 0.5355  | 0.4734     | 0.6906 | 0    |
| Reunion (28) v. South_Alligator_River (10)             | 1364.2555 | 0.0040     | 0.0002 | 0.0070  | -5.1789   | 0.9091    | 0.0094 | 0.0040    | 0.0104 | 0.0040     | 0.0895  | 0.0060    | 0.1049  | 0.0060     | 0.1785 | 0    |
| Adelaide_River (4) v. Reunion (28)                     | 1222.1808 | 0.1469     | 0.0003 | 0.1459  | -7.8471   | 0.8586    | 0.0089 | 0.0803    | 0.0100 | 0.0808     | 0.2403  | 0.0939    | 0.2695  | 0.0960     | 0.4110 | 0    |
| Clarence_River (11) v. Reunion (28)                    | 1454.0720 | 0.0020     | 0.0001 | 0.0300  | -4.6313   | 0.1269    | 0.0087 | 0.0060    | 0.0097 | 0.0060     | 0.0756  | 0.0300    | 0.0895  | 0.0240     | 0.1535 | 0    |
| East_Alligator_River (7) v. Thailand (5)               | 902.3264  | 0.0270     | 0.0003 | 0.0500  | -17.0205  | 0.3666    | 0.0086 | 0.0490    | 0.0095 | 0.0490     | 0.4489  | 0.2987    | 0.4833  | 0.2667     | 0.6434 | 0    |
| Adelaide_River (4) v. Sri_Lanka (12)                   | 988.2344  | 0.2757     | 0.0003 | 0.0879  | -13.8484  | 0.9530    | 0.0085 | 0.0629    | 0.0095 | 0.0629     | 0.3944  | 0.0090    | 0.4279  | 0.0080     | 0.5897 | 0    |
| Daly_River (3) v. Papua_New_Guinea (8)                 | 874.8755  | 0.1678     | 0.0003 | 0.5355  | -75.9501  | 1.1439    | 0.0085 | 0.1738    | 0.0095 | 0.1718     | 0.8341  | 0.8611    | 0.8490  | 0.8611     | 0.9177 | 0    |
| East_Alligator_River (7) v. Reunion (28)               | 1286.8956 | 0.0689     | 0.0002 | 0.0230  | -5.6705   | 0.8591    | 0.0084 | 0.0330    | 0.0094 | 0.0330     | 0.1232  | 0.0370    | 0.1428  | 0.0350     | 0.2368 | 0    |
| Sri_Lanka (12) v. Sydney_Harbour (8)                   | 1099.1365 | 0.0140     | 0.0001 | 0.3746  | -7.5142   | 0.7592    | 0.0080 | 0.0070    | 0.0089 | 0.0070     | 0.1768  | 0.0090    | 0.2025  | 0.0090     | 0.3223 | 0    |
| Daly_River (3) v. Seychelles (36)                      | 1335.6156 | 0.0440     | 0.0003 | 0.2308  | -7.8035   | 0.0631    | 0.0079 | 0.1247    | 0.0088 | 0.1250     | 0.2857  | 0.7872    | 0.3186  | 0.7597     | 0.4700 | 0    |
| East_Alligator_River (7) v. Towns_River (2)            | 760.0716  | 0.4406     | 0.0005 | 0.0669  | 12.0980   | 0.9713    | 0.0079 | 0.1856    | 0.0088 | 0.1856     | 5.6343  | 0.0276    | 4.9526  | 0.0276     | 1.5958 | 0    |
| Indonesia (4) v. Unknown (2)                           | 667.3588  | 0.4715     | 0.0004 | 0.3916  | NA        | NA        | 0.0075 | 0.4715    | 0.0082 | 0.4715     | NA      | NA        | NA      | NA         | NA     | NA   |
| Adelaide_River (4) v. East_Alligator_River (7)         | 856.8397  | 0.1708     | 0.0003 | 0.1449  | -35.7227  | 0.8791    | 0.0074 | 0.1239    | 0.0082 | 0.1279     | 0.6665  | 0.0929    | 0.6916  | 0.0929     | 0.8149 | 0    |
| Mozambique (11) v. Papua_New_Guinea (8)                | 1043.5265 | 0.1369     | 0.0001 | 0.7403  | -8.2953   | 0.8332    | 0.0073 | 0.0330    | 0.0081 | 0.0340     | 0.2000  | 0.0709    | 0.2273  | 0.0679     | 0.3561 | 0    |
| Arabian_Sea (15) v. East_Alligator_River (7)           | 1104.7522 | 0.1259     | 0.0002 | 0.0440  | -7.2099   | 0.9500    | 0.0073 | 0.0090    | 0.0081 | 0.0090     | 0.1720  | 0.0020    | 0.1968  | 0.0020     | 0.3147 | 0    |
| Seychelles (36) v. Sydney_Harbour (8)                  | 1400.0457 | 0.0020     | 0.0002 | 0.0140  | -4.7432   | 0.2977    | 0.0071 | 0.0110    | 0.0079 | 0.0110     | 0.0909  | 0.0350    | 0.1068  | 0.0280     | 0.1812 | 0    |
| Reunion (28) v. Thailand (5)                           | 1346.7053 | 0.0150     | 0.0002 | 0.1489  | -6.2375   | 0.0980    | 0.0065 | 0.1089    | 0.0072 | 0.1099     | 0.1680  | 0.5850    | 0.1931  | 0.5440     | 0.3092 | 0    |
| Reunion (28) v. Wenlock_River (4)                      | 1346.2016 | 0.0140     | 0.0002 | 0.4995  | -7.0671   | 0.0424    | 0.0065 | 0.1512    | 0.0072 | 0.1512     | 0.2193  | 0.8184    | 0.2486  | 0.7871     | 0.3837 | 0    |
| South_Alligator_River (10) v. Sydney_Harbour (8)       | 1018.1389 | 0.0360     | 0.0001 | 0.6803  | -8.9427   | 0.7003    | 0.0063 | 0.0330    | 0.0070 | 0.0330     | 0.2163  | 0.0689    | 0.2447  | 0.0619     | 0.3790 | 0    |
| Arabian_Sea (15) v. Clarence_River (11)                | 1207.4258 | 0.0200     | 0.0001 | 0.4695  | -5.5931   | 0.7213    | 0.0063 | 0.0130    | 0.0070 | 0.0130     | 0.1071  | 0.0230    | 0.1256  | 0.0220     | 0.2102 | 0    |
| Clarence_River (11) v. Sri_Lanka (12)                  | 1163.7924 | 0.0220     | 0.0002 | 0.0280  | -6.2141   | 0.9191    | 0.0063 | 0.0420    | 0.0070 | 0.0420     | 0.1280  | 0.0470    | 0.1490  | 0.0460     | 0.2456 | 0    |
| East_Alligator_River (7) v. South_Alligator_River (10) | 975.5935  | 0.0999     | 0.0002 | 0.3696  | -10.1834  | 0.8392    | 0.0062 | 0.0629    | 0.0069 | 0.0629     | 0.2532  | 0.0759    | 0.2831  | 0.0759     | 0.4280 | 0    |
| Sri_Lanka (12) v. Thailand (5)                         | 1037.7147 | 0.0609     | 0.0002 | 0.4406  | -9.7728   | 0.2797    | 0.0060 | 0.0709    | 0.0066 | 0.0709     | 0.2751  | 0.4695    | 0.3076  | 0.4246     | 0.4569 | 0    |
| Mozambique (11) v. Wenlock_River (4)                   | 1031.0080 | 0.1069     | 0.0003 | 0.3397  | -13.2967  | 0.0834    | 0.0060 | 0.1541    | 0.0066 | 0.1572     | 0.3917  | 0.8642    | 0.4271  | 0.8588     | 0.5883 | 0    |
| Sri_Lanka (12) v. Towns_River (2)                      | 859.1948  | 0.6703     | 0.0005 | 0.2198  | 26.6100   | 0.9777    | 0.0059 | 0.2900    | 0.0065 | 0.2900     | 1.7219  | 0.0432    | 1.6385  | 0.0432     | 1.2346 | 0    |
| East_Alligator_River (7) v. Sydney_Harbour (8)         | 932.6645  | 0.1908     | 0.0002 | 0.3337  | -11.1195  | 0.9461    | 0.0057 | 0.0609    | 0.0064 | 0.0609     | 0.2909  | 0.0589    | 0.3231  | 0.0589     | 0.4757 | 0    |
| Arabian_Sea (15) v. Mozambique (11)                    | 1207.9446 | 0.0180     | 0.0001 | 0.1768  | -5.8082   | 0.9371    | 0.0057 | 0.0110    | 0.0064 | 0.0110     | 0.1127  | 0.0050    | 0.1315  | 0.0060     | 0.2195 | 0    |
| South_Africa (23) v. Towns_River (2)                   | 1027.9503 | 0.7682     | 0.0005 | 0.1199  | -118.5844 | 0.9803    | 0.0055 | 0.1743    | 0.0061 | 0.1743     | 0.9082  | 0.0319    | 0.9165  | 0.0319     | 0.9562 | 0    |
| Mozambique (11) v. Reunion (28)                        | 1367.2751 | 0.0080     | 0.0001 | 0.2677  | -4.8361   | 0.4216    | 0.0054 | 0.0320    | 0.0061 | 0.0330     | 0.0789  | 0.0210    | 0.0929  | 0.0180     | 0.1592 | 0    |
| Caribbean_Sea (2) v. Gulf_of_Mexico (40)               | 911.5208  | 0.3417     | 0.0002 | 0.4266  | 19.0179   | 0.4043    | 0.0053 | 0.2949    | 0.0059 | 0.2943     | 3.1415  | 0.6170    | 2.9350  | 0.6099     | 1.4672 | 0    |
| Reunion (28) v. Sydney_Harbour (8)                     | 1294.5729 | 0.0430     | 0.0001 | 0.1399  | -5.3241   | 0.2318    | 0.0053 | 0.0609    | 0.0059 | 0.0609     | 0.1046  | 0.1968    | 0.1222  | 0.1798     | 0.2053 | 0    |

Table 38: Pairwise Fst for 1849 DArTcap loci between the all sites, but with a subset of Australia  
(continued)

|                                                   | Chi2      | Chi2.p.val | D      | D.p.val | Fis       | Fis.p.val | Fst    | Fst.p.val | F'st   | F'st.p.val | Gst     | Gst.p.val | G'st    | G'st.p.val | G'st   | G'st   |
|---------------------------------------------------|-----------|------------|--------|---------|-----------|-----------|--------|-----------|--------|------------|---------|-----------|---------|------------|--------|--------|
| Adelaide_River (4) v. Clarence_River (11)         | 941.4020  | 0.4066     | 0.0003 | 0.0939  | -14.6119  | 0.9790    | 0.0052 | 0.2657    | 0.0058 | 0.2657     | 0.4116  | 0.0310    | 0.4458  | 0.0320     | 0.6074 | 0.0000 |
| Brazil (52) v. Western_North_Atlantic (8)         | 1078.0912 | 0.6563     | 0.0000 | 0.5255  | -8.6921   | 0.9870    | 0.0052 | 0.0410    | 0.0056 | 0.0410     | 0.1440  | 0.0190    | 0.1594  | 0.0190     | 0.2652 | 0.0000 |
| East_Alligator_River (7) v. Mozambique (11)       | 1030.0325 | 0.1499     | 0.0002 | 0.2228  | -8.9136   | 0.7942    | 0.0052 | 0.0649    | 0.0058 | 0.0639     | 0.2245  | 0.1758    | 0.2532  | 0.1798     | 0.3901 | 0.0000 |
| Reunion (28) v. Sri_Lanka (12)                    | 1390.3773 | 0.0070     | 0.0001 | 0.0939  | -4.5725   | 0.6923    | 0.0051 | 0.0170    | 0.0057 | 0.0170     | 0.0691  | 0.0340    | 0.0817  | 0.0320     | 0.1410 | 0.0000 |
| Reunion (28) v. Seychelles (36)                   | 1571.8855 | 0.0010     | 0.0001 | 0.0050  | -3.5600   | 0.9990    | 0.0051 | 0.0010    | 0.0056 | 0.0010     | 0.0310  | 0.0010    | 0.0371  | 0.0010     | 0.0661 | 0.0000 |
| Clarence_River (11) v. East_Alligator_River (7)   | 996.9789  | 0.2727     | 0.0002 | 0.2438  | -8.5864   | 0.9820    | 0.0050 | 0.1778    | 0.0055 | 0.1788     | 0.2148  | 0.0639    | 0.2434  | 0.0729     | 0.3771 | 0.0000 |
| Clarence_River (11) v. South_Africa (23)          | 1250.3632 | 0.0400     | 0.0001 | 0.1469  | -4.9951   | 0.1229    | 0.0048 | 0.0270    | 0.0055 | 0.0270     | 0.0838  | 0.1728    | 0.0989  | 0.1518     | 0.1686 | 0.0000 |
| South_Alligator_River (10) v. Wenlock_River (4)   | 969.7762  | 0.0599     | 0.0002 | 0.8402  | -16.3397  | 0.0671    | 0.0048 | 0.1852    | 0.0053 | 0.1852     | 0.4447  | 0.8519    | 0.4792  | 0.8448     | 0.6395 | 0.0000 |
| South_Africa (23) v. South_Alligator_River (10)   | 1209.3466 | 0.1548     | 0.0001 | 0.2957  | -5.4308   | 0.9191    | 0.0047 | 0.0410    | 0.0052 | 0.0420     | 0.0962  | 0.0959    | 0.1125  | 0.0959     | 0.1904 | 0.0000 |
| Daly_River (3) v. Sri_Lanka (12)                  | 961.0287  | 0.3117     | 0.0003 | 0.5015  | -21.5636  | 0.1465    | 0.0045 | 0.2503    | 0.0050 | 0.2503     | 0.5599  | 0.8535    | 0.5916  | 0.8555     | 0.7382 | 0.0000 |
| Papua_New_Guinea (8) v. Reunion (28)              | 1210.6043 | 0.2228     | 0.0001 | 0.2677  | -5.5034   | 0.6444    | 0.0045 | 0.1039    | 0.0050 | 0.1039     | 0.1073  | 0.1359    | 0.1250  | 0.1319     | 0.2098 | 0.0000 |
| Darwin_Coastal (2) v. Reunion (28)                | 1230.3032 | 0.1578     | 0.0004 | 0.7063  | -33.5158  | 0.3099    | 0.0044 | 0.2821    | 0.0050 | 0.2559     | 0.7277  | 0.6901    | 0.7499  | 0.6901     | 0.8553 | 0.0000 |
| Mozambique (11) v. Towns_River (2)                | 895.5756  | 0.5105     | 0.0006 | 0.0959  | 22.5004   | 0.6591    | 0.0044 | 0.2655    | 0.0049 | 0.2655     | 1.9386  | 0.3788    | 1.8244  | 0.3788     | 1.2805 | 0.0000 |
| Reunion (28) v. Towns_River (2)                   | 1183.6801 | 0.0257     | 0.0005 | 0.1289  | -54.0274  | 0.9062    | 0.0044 | 0.3009    | 0.0049 | 0.3009     | 0.8160  | 0.0973    | 0.8315  | 0.0973     | 0.9072 | 0.0000 |
| Adelaide_River (4) v. Seychelles (36)             | 1216.3055 | 0.3546     | 0.0002 | 0.3706  | -6.6652   | 0.9221    | 0.0043 | 0.1878    | 0.0048 | 0.1878     | 0.2046  | 0.0699    | 0.2315  | 0.0769     | 0.3621 | 0.0000 |
| Reunion (28) v. South_Africa (23)                 | 1472.1707 | 0.0050     | 0.0001 | 0.0020  | -3.8544   | 0.9640    | 0.0043 | 0.0080    | 0.0049 | 0.0080     | 0.0408  | 0.0080    | 0.0486  | 0.0080     | 0.0859 | 0.0000 |
| Clarence_River (11) v. Daly_River (3)             | 930.0515  | 0.3766     | 0.0003 | 0.4905  | -22.8094  | 0.4525    | 0.0043 | 0.3463    | 0.0048 | 0.3463     | 0.5795  | 0.5325    | 0.6112  | 0.5325     | 0.7538 | 0.0000 |
| Arabian_Sea (15) v. Papua_New_Guinea (8)          | 1089.1414 | 0.1978     | 0.0001 | 0.4316  | -6.8242   | 0.8721    | 0.0042 | 0.0589    | 0.0047 | 0.0589     | 0.1507  | 0.0360    | 0.1736  | 0.0350     | 0.2819 | 0.0000 |
| South_Africa (23) v. Sydney_Harbour (8)           | 1180.4263 | 0.2168     | 0.0002 | 0.0629  | -5.7041   | 0.2408    | 0.0042 | 0.0639    | 0.0047 | 0.0639     | 0.1160  | 0.3387    | 0.1351  | 0.3197     | 0.2250 | 0.0000 |
| Mozambique (11) v. Sri_Lanka (12)                 | 1130.5400 | 0.0819     | 0.0002 | 0.0869  | -6.5048   | 0.8641    | 0.0041 | 0.0809    | 0.0046 | 0.0829     | 0.1345  | 0.0719    | 0.1558  | 0.0699     | 0.2559 | 0.0000 |
| Mozambique (11) v. Seychelles (36)                | 1390.0386 | 0.0140     | 0.0001 | 0.1888  | -4.3710   | 0.3556    | 0.0041 | 0.0300    | 0.0046 | 0.0300     | 0.0671  | 0.0150    | 0.0794  | 0.0120     | 0.1372 | 0.0000 |
| Seychelles (36) v. South_Alligator_River (10)     | 1305.5406 | 0.0609     | 0.0001 | 0.0949  | -4.6829   | 0.8661    | 0.0041 | 0.0340    | 0.0045 | 0.0340     | 0.0749  | 0.0260    | 0.0881  | 0.0260     | 0.1517 | 0.0000 |
| South_Alligator_River (10) v. Thailand (5)        | 983.2481  | 0.0150     | 0.0003 | 0.0919  | -12.3873  | 0.0929    | 0.0040 | 0.1738    | 0.0045 | 0.1748     | 0.3381  | 0.6873    | 0.3721  | 0.6573     | 0.5308 | 0.0000 |
| Daly_River (3) v. Thailand (5)                    | 763.8674  | 0.2288     | 0.0003 | 0.5375  | 46.6455   | 0.5788    | 0.0039 | 0.3835    | 0.0043 | 0.3835     | 1.3796  | 0.4751    | 1.3362  | 0.4629     | 1.1413 | 0.0000 |
| Clarence_River (11) v. Seychelles (36)            | 1411.9116 | 0.0040     | 0.0001 | 0.1169  | -4.2002   | 0.0639    | 0.0038 | 0.0480    | 0.0043 | 0.0480     | 0.0629  | 0.1948    | 0.0747  | 0.1578     | 0.1295 | 0.0000 |
| Clarence_River (11) v. Mozambique (11)            | 1124.7493 | 0.1159     | 0.0001 | 0.4705  | -6.5442   | 0.8362    | 0.0038 | 0.1479    | 0.0043 | 0.1469     | 0.1404  | 0.1329    | 0.1628  | 0.1329     | 0.2659 | 0.0000 |
| Brazil (52) v. Gulf_of_Mexico (40)                | 1437.4854 | 0.0010     | 0.0000 | 0.1738  | -5.5718   | 1.0000    | 0.0038 | 0.0010    | 0.0041 | 0.0010     | 0.0328  | 0.0010    | 0.0373  | 0.0010     | 0.0679 | 0.0000 |
| Adelaide_River (4) v. Papua_New_Guinea (8)        | 850.1131  | 0.4146     | 0.0003 | 0.1578  | -26.3131  | 0.8939    | 0.0037 | 0.2727    | 0.0041 | 0.2727     | 0.5825  | 0.1231    | 0.6117  | 0.1221     | 0.7546 | 0.0000 |
| Mozambique (11) v. South_Africa (23)              | 1238.8978 | 0.0178     | 0.0001 | 0.5335  | -5.0399   | 0.4366    | 0.0037 | 0.0569    | 0.0041 | 0.0589     | 0.0860  | 0.0699    | 0.1011  | 0.0669     | 0.1722 | 0.0000 |
| Seychelles (36) v. Thailand (5)                   | 1283.7125 | 0.0829     | 0.0002 | 0.0679  | -5.5690   | 0.0919    | 0.0036 | 0.1808    | 0.0040 | 0.1818     | 0.1468  | 0.6863    | 0.1698  | 0.6284     | 0.2761 | 0.0000 |
| Arabian_Sea (15) v. Sydney_Harbour (8)            | 1135.0700 | 0.0909     | 0.0001 | 0.5415  | -6.5343   | 0.5744    | 0.0036 | 0.0939    | 0.0040 | 0.0939     | 0.1451  | 0.1239    | 0.1677  | 0.1139     | 0.2732 | 0.0000 |
| Arabian_Sea (15) v. South_Africa (23)             | 1320.0624 | 0.0220     | 0.0001 | 0.2258  | -4.4496   | 0.6823    | 0.0035 | 0.0230    | 0.0039 | 0.0230     | 0.0624  | 0.0480    | 0.0740  | 0.0490     | 0.1284 | 0.0000 |
| Arabian_Sea (15) v. South_Alligator_River (10)    | 1115.0126 | 0.1938     | 0.0001 | 0.0989  | -6.3538   | 0.9441    | 0.0034 | 0.0909    | 0.0038 | 0.0909     | 0.1248  | 0.0569    | 0.1447  | 0.0589     | 0.2396 | 0.0000 |
| Adelaide_River (4) v. Arabian_Sea (15)            | 993.5807  | 0.6264     | 0.0002 | 0.6264  | -11.2483  | 0.9449    | 0.0034 | 0.2593    | 0.0038 | 0.2595     | 0.3324  | 0.0541    | 0.3652  | 0.0571     | 0.5236 | 0.0000 |
| Adelaide_River (4) v. Thailand (5)                | 781.4286  | 0.2188     | 0.0004 | 0.0220  | -195.7076 | 0.9401    | 0.0033 | 0.3377    | 0.0037 | 0.3377     | 0.9266  | 0.0719    | 0.9334  | 0.0719     | 0.9654 | 0.0000 |
| East_Alligator_River (7) v. Seychelles (36)       | 1195.8916 | 0.5554     | 0.0001 | 0.3237  | -5.1411   | 0.8711    | 0.0032 | 0.1279    | 0.0035 | 0.1279     | 0.1061  | 0.0669    | 0.1236  | 0.0689     | 0.2077 | 0.0000 |
| South_Africa (23) v. Sri_Lanka (12)               | 1252.2227 | 0.0989     | 0.0001 | 0.1938  | -4.8724   | 0.7183    | 0.0032 | 0.0589    | 0.0035 | 0.0599     | 0.0770  | 0.1229    | 0.0908  | 0.1179     | 0.1558 | 0.0000 |
| Clarence_River (11) v. Sydney_Harbour (8)         | 1006.3243 | 0.3387     | 0.0002 | 0.0400  | -7.7431   | 0.8202    | 0.0031 | 0.2587    | 0.0035 | 0.2587     | 0.1845  | 0.1978    | 0.2113  | 0.2028     | 0.3341 | 0.0000 |
| Adelaide_River (4) v. Mozambique (11)             | 946.6996  | 0.4605     | 0.0003 | 0.1898  | -16.2080  | 0.5687    | 0.0030 | 0.3086    | 0.0035 | 0.3001     | 0.4403  | 0.5100    | 0.4737  | 0.5268     | 0.6346 | 0.0000 |
| Seychelles (36) v. Wenlock_River (4)              | 1327.9458 | 0.0400     | 0.0002 | 0.8771  | -6.1447   | 0.0170    | 0.0030 | 0.2657    | 0.0033 | 0.2657     | 0.1896  | 0.9221    | 0.2166  | 0.9031     | 0.3414 | 0.0000 |
| Arabian_Sea (15) v. Reunion (28)                  | 1444.5863 | 0.0050     | 0.0001 | 0.1469  | -4.1460   | 0.3976    | 0.0030 | 0.0799    | 0.0033 | 0.0799     | 0.0541  | 0.1309    | 0.0642  | 0.1249     | 0.1122 | 0.0000 |
| Papua_New_Guinea (8) v. Thailand (5)              | 910.1297  | 0.1439     | 0.0002 | 0.7672  | -14.2907  | 0.1918    | 0.0029 | 0.3267    | 0.0032 | 0.3277     | 0.3904  | 0.6573    | 0.4252  | 0.6364     | 0.5866 | 0.0000 |
| Sydney_Harbour (8) v. Thailand (5)                | 925.8270  | 0.0949     | 0.0002 | 0.4525  | -13.6220  | 0.3506    | 0.0027 | 0.2807    | 0.0030 | 0.2807     | 0.3795  | 0.5225    | 0.4147  | 0.5065     | 0.5758 | 0.0000 |
| Arabian_Sea (15) v. Darwin_Coastal (2)            | 1005.1362 | 0.3586     | 0.0004 | 0.5405  | 111.3996  | 0.6475    | 0.0029 | 0.3474    | 0.0029 | 0.3474     | 1.1179  | 0.3391    | 1.1060  | 0.3391     | 1.0501 | 0.0000 |
| East_Alligator_River (7) v. Trinity_inlet (1)     | 720.2502  | 0.2248     | 0.0007 | 0.6064  | 3.1924    | 1.0000    | 0.0026 | 1.0000    | 0.0029 | 1.0000     | -1.7843 | 1.0000    | -0.8893 | 1.0000     | 3.4089 | 1.0000 |
| Adelaide_River (4) v. Trinity_inlet (1)           | 666.6240  | 0.1878     | 0.0006 | 1.0000  | 2.5850    | 1.0000    | 0.0026 | 0.5040    | 0.0028 | 0.5040     | -1.4523 | 1.0000    | -0.4728 | 1.0000     | 4.2563 | 1.0000 |
| Clarence_River (11) v. South_Alligator_River (10) | 1061.2904 | 0.1259     | 0.0001 | 0.4026  | -7.2648   | 0.8482    | 0.0025 | 0.2378    | 0.0028 | 0.2378     | 0.1570  | 0.2118    | 0.1807  | 0.2158     | 0.2919 | 0.0000 |
| Mozambique (11) v. South_Alligator_River (10)     | 1064.2663 | 0.2298     | 0.0001 | 0.4675  | -7.4770   | 0.7512    | 0.0024 | 0.2148    | 0.0027 | 0.2168     | 0.1636  | 0.2248    | 0.1875  | 0.2248     | 0.3017 | 0.0000 |
| South_Africa (23) v. Thailand (5)                 | 1203.2235 | 0.0519     | 0.0002 | 0.7353  | -6.7062   | 0.0669    | 0.0024 | 0.2478    | 0.0027 | 0.2478     | 0.1820  | 0.8142    | 0.2083  | 0.7652     | 0.3302 | 0.0000 |
| Daly_River (3) v. Mozambique (11)                 | 949.4926  | 0.3996     | 0.0003 | 0.7712  | -26.0216  | 0.0914    | 0.0023 | 0.3981    | 0.0026 | 0.4020     | 0.6137  | 0.9173    | 0.6433  | 0.9173     | 0.7789 | 0.0000 |
| Darwin_Coastal (2) v. Towns_River (2)             | 576.4500  | 0.6364     | 0.0004 | 0.6364  | NA        | NA        | 0.0022 | 0.6364    | 0.0024 | 0.4835     | NA      | NA        | NA      | NA         | NA     | NA     |
| Sri_Lanka (12) v. Trinity_inlet (1)               | 913.8882  | 0.3706     | 0.0007 | 0.5095  | 3.8034    | 1.0000    | 0.0020 | 0.6017    | 0.0022 | 0.6017     | -2.4250 | 1.0000    | -1.5183 | 1.0000     | 2.7672 | 1.0000 |



Table 38: Pairwise Fst for 1849 DAR\_Tcap loci between the all sites, but with a subset of Australia  
(continued)

|                                                 | Chi2      | Chi2.p.val | D      | D.p.val | Fis      | Fis.p.val | Fst     | Fst.p.val | F'st    | F'st.p.val | Gst      | Gst.p.val | G'st     | G'st.p.val | G''st  | G''st.p.val |
|-------------------------------------------------|-----------|------------|--------|---------|----------|-----------|---------|-----------|---------|------------|----------|-----------|----------|------------|--------|-------------|
| Adelaide_River (4) v. Towns_River (2)           | 628.5349  | 0.7313     | 0.0004 | 0.7483  | 6.9651   | 1.0000    | -0.0044 | 0.5927    | -0.0048 | 0.5927     | -5.2701  | 0.1431    | -4.0376  | 0.1431     | 2.1798 | 0.1431      |
| Darwin_Coastal (2) v. East_Alligator_River (7)  | 750.0513  | 0.5764     | 0.0003 | 0.7832  | 13.5712  | 0.5058    | -0.0046 | 0.6767    | -0.0051 | 0.6923     | 4.0794   | 0.6773    | 3.6425   | 0.6773     | 1.5202 | 0.6773      |
| Adelaide_River (4) v. Darwin_Coastal (2)        | 673.5342  | 0.2727     | 0.0003 | 1.0000  | 7.5064   | 0.2357    | -0.0047 | 0.4874    | -0.0052 | 0.4874     | -7.8941  | 0.8750    | -6.2094  | 0.8750     | 2.0457 | 0.8750      |
| Caribbean_Sea (2) v. Western_North_Atlantic (8) | 508.1961  | 0.7443     | 0.0002 | 0.7502  | 8.5480   | 0.7754    | -0.0053 | 0.7561    | -0.0058 | 0.6254     | -4.1316  | 0.3832    | -3.3410  | 0.3832     | 2.3862 | 0.3832      |
| Darwin_Coastal (2) v. Trinity_inlet (1)         | 521.3750  | 0.6643     | 0.0005 | 0.6643  | NA       | NA        | -0.0058 | 1.0000    | -0.0064 | 0.6643     | NA       | NA        | NA       | NA         | NA     | NA          |
| Daly_River (3) v. South_Alligator_River (10)    | 874.9653  | 0.3796     | 0.0002 | 0.9760  | -40.4013 | 0.0626    | -0.0059 | 0.7916    | -0.0066 | 0.7916     | 0.7121   | 0.9507    | 0.7354   | 0.9507     | 0.8455 | 0.9507      |
| Daly_River (3) v. Wenlock_River (4)             | 740.3896  | 0.7672     | 0.0004 | 0.7213  | 23.1691  | 0.2727    | -0.0065 | 0.7672    | -0.0072 | 0.7672     | 1.9954   | 0.5854    | 1.8670   | 0.5854     | 1.2894 | 0.5854      |
| Darwin_Coastal (2) v. Unknown (2)               | 559.5262  | 1.0000     | 0.0004 | 1.0000  | 3.8406   | 0.3287    | -0.0065 | 1.0000    | -0.0072 | 1.0000     | -1.9410  | 0.3287    | -1.0623  | 0.3287     | 3.1916 | 0.3287      |
| Arabian_Sea (15) v. Trinity_inlet (1)           | 914.4754  | 0.6993     | 0.0007 | 0.4915  | 4.0808   | 1.0000    | -0.0066 | 1.0000    | -0.0073 | 1.0000     | -2.9064  | 1.0000    | -1.9490  | 1.0000     | 2.5469 | 1.0000      |
| Towns_River (2) v. Unknown (2)                  | 544.1417  | 0.6583     | 0.0005 | 0.3127  | NA       | NA        | -0.0067 | 1.0000    | -0.0074 | 0.8292     | NA       | NA        | NA       | NA         | NA     | NA          |
| Darwin_Coastal (2) v. Mozambique (11)           | 858.6603  | 0.7612     | 0.0004 | 0.8432  | 27.7003  | 0.3692    | -0.0079 | 0.6713    | -0.0090 | 0.6307     | 1.6825   | 0.6774    | 1.6025   | 0.6774     | 1.2246 | 0.6774      |
| Daly_River (3) v. Darwin_Coastal (2)            | 645.8198  | 0.6154     | 0.0005 | 0.6154  | 6.0191   | 0.6508    | -0.0080 | 0.7133    | -0.0089 | 0.7133     | -4.2394  | 0.5359    | -3.0819  | 0.4420     | 2.2601 | 0.4420      |
| Clarence_River (11) v. Trinity_inlet (1)        | 840.8295  | 0.3896     | 0.0008 | 0.4855  | 3.7561   | 1.0000    | -0.0086 | 0.4824    | -0.0095 | 0.4824     | -2.3866  | 1.0000    | -1.4671  | 1.0000     | 2.7792 | 1.0000      |
| Thailand (5) v. Unknown (2)                     | 670.2214  | 0.7942     | 0.0005 | 0.1928  | 9.9531   | 1.0000    | -0.0094 | 0.8402    | -0.0104 | 0.8402     | 14.8594  | 0.0499    | 12.5654  | 0.0499     | 1.7292 | 0.0499      |
| East_Alligator_River (7) v. Unknown (2)         | 735.2443  | 0.6653     | 0.0003 | 0.8791  | 13.2841  | 0.5807    | -0.0095 | 0.7922    | -0.0105 | 0.7922     | 4.3775   | 0.5143    | 3.8981   | 0.5143     | 1.5389 | 0.5143      |
| South_Africa (23) v. Trinity_inlet (1)          | 1010.1417 | 0.7982     | 0.0007 | 0.8332  | 4.5868   | 1.0000    | -0.0096 | 1.0000    | -0.0107 | 1.0000     | -4.3532  | 1.0000    | -3.2004  | 1.0000     | 2.2527 | 1.0000      |
| Clarence_River (11) v. Unknown (2)              | 806.1261  | 0.8252     | 0.0004 | 0.4955  | 29.8404  | 0.9452    | -0.0102 | 0.7260    | -0.0113 | 0.7260     | 1.6118   | 0.0635    | 1.5409   | 0.0635     | 1.2071 | 0.0635      |
| Papua_New_Guinea (8) v. Unknown (2)             | 769.2311  | 0.7203     | 0.0003 | 0.8791  | 15.8789  | 0.4786    | -0.0103 | 0.8567    | -0.0114 | 0.8567     | 3.0248   | 0.5577    | 2.7542   | 0.5577     | 1.4359 | 0.5577      |
| Darwin_Coastal (2) v. Wenlock_River (4)         | 667.6609  | 1.0000     | 0.0004 | 0.8751  | 8.0633   | 0.7143    | -0.0114 | 0.9259    | -0.0127 | 0.9259     | -19.5609 | 0.1925    | -15.7431 | 0.1925     | 1.9021 | 0.1925      |
| Reunion (28) v. Unknown (2)                     | 1051.9413 | 0.7143     | 0.0003 | 0.8791  | -37.6713 | 0.4035    | -0.0115 | 0.8006    | -0.0127 | 0.8006     | 0.7465   | 0.6316    | 0.7670   | 0.6316     | 0.8666 | 0.6316      |
| Sri_Lanka (12) v. Unknown (2)                   | 887.2710  | 0.5205     | 0.0003 | 0.7552  | 34.4005  | 0.6362    | -0.0118 | 0.8682    | -0.0130 | 0.8682     | 1.5064   | 0.3441    | 1.4506   | 0.3441     | 1.1798 | 0.3441      |
| Thailand (5) v. Trinity_inlet (1)               | 642.0085  | 0.6623     | 0.0007 | 0.8362  | 2.8892   | 1.0000    | -0.0124 | 1.0000    | -0.0137 | 1.0000     | -1.6216  | 1.0000    | -0.6815  | 1.0000     | 3.7051 | 1.0000      |
| Sydney_Harbour (8) v. Trinity_inlet (1)         | 757.5779  | 0.5604     | 0.0007 | 0.8941  | 3.3631   | 1.0000    | -0.0135 | 1.0000    | -0.0150 | 1.0000     | -1.9376  | 1.0000    | -1.0397  | 1.0000     | 3.1755 | 1.0000      |
| Seychelles (36) v. Unknown (2)                  | 1050.5379 | 0.9121     | 0.0003 | 0.9431  | -21.9235 | 0.6319    | -0.0137 | 0.9383    | -0.0152 | 0.9383     | 0.6280   | 0.4087    | 0.6553   | 0.4174     | 0.7883 | 0.4174      |
| Towns_River (2) v. Wenlock_River (4)            | 658.9220  | 0.9411     | 0.0005 | 0.3586  | 7.6012   | 0.8929    | -0.0140 | 0.8537    | -0.0157 | 0.8308     | -10.1449 | 0.2273    | -8.0333  | 0.2273     | 1.9878 | 0.2273      |
| Arabian_Sea (15) v. Unknown (2)                 | 890.8158  | 0.8871     | 0.0003 | 0.9860  | 81.3743  | 0.6275    | -0.0148 | 0.9607    | -0.0164 | 0.9607     | 1.1720   | 0.3686    | 1.1546   | 0.3686     | 1.0712 | 0.3686      |
| Sydney_Harbour (8) v. Unknown (2)               | 761.5227  | 0.7922     | 0.0004 | 0.8521  | 16.1916  | 0.5161    | -0.0151 | 0.9387    | -0.0168 | 0.9387     | 2.8872   | 0.3986    | 2.6344   | 0.3986     | 1.4205 | 0.3986      |
| South_Africa (23) v. Unknown (2)                | 1001.7286 | 0.8781     | 0.0003 | 0.9790  | -58.1887 | 0.4757    | -0.0153 | 0.9590    | -0.0169 | 0.9590     | 0.8227   | 0.5604    | 0.8378   | 0.5604     | 0.9110 | 0.5604      |
| Unknown (2) v. Wenlock_River (4)                | 644.6439  | 1.0000     | 0.0004 | 1.0000  | 8.0260   | 0.5532    | -0.0187 | 1.0000    | -0.0209 | 1.0000     | -16.1912 | 0.1790    | -13.0059 | 0.1790     | 1.9220 | 0.1790      |
| South_Alligator_River (10) v. Unknown (2)       | 761.8605  | 0.9600     | 0.0003 | 0.9750  | 19.7495  | 0.5007    | -0.0207 | 1.0000    | -0.0229 | 1.0000     | 2.3162   | 0.3737    | 2.1534   | 0.3737     | 1.3478 | 0.3737      |
| Trinity_inlet (1) v. Wenlock_River (4)          | 631.1450  | 1.0000     | 0.0008 | 1.0000  | 2.6428   | 1.0000    | -0.0262 | 1.0000    | -0.0294 | 1.0000     | -1.5163  | 1.0000    | -0.5327  | 1.0000     | 3.9687 | 1.0000      |
| Daly_River (3) v. Unknown (2)                   | 597.6625  | 1.0000     | 0.0004 | 1.0000  | 5.9453   | 0.5563    | -0.0278 | 1.0000    | -0.0309 | 1.0000     | -3.8841  | 0.1192    | -2.8042  | 0.2373     | 2.3190 | 0.2373      |
| Mozambique (11) v. Trinity_inlet (1)            | 817.3900  | 0.7413     | 0.0007 | 0.8132  | 3.6731   | 1.0000    | -0.0288 | 1.0000    | -0.0319 | 1.0000     | -2.2404  | 1.0000    | -1.3475  | 1.0000     | 2.8926 | 1.0000      |
| Mozambique (11) v. Unknown (2)                  | 815.7891  | 0.9011     | 0.0003 | 1.0000  | 26.7065  | 0.3398    | -0.0297 | 0.9757    | -0.0329 | 0.9757     | 1.7470   | 0.6988    | 1.6607   | 0.6988     | 1.2405 | 0.6988      |
| Trinity_inlet (1) v. Unknown (2)                | 467.2917  | 1.0000     | 0.0004 | 1.0000  | NA       | NA        | -0.0360 | 1.0000    | -0.0402 | 1.0000     | NA       | NA        | NA       | NA         | NA     | NA          |
| Daly_River (3) v. Trinity_inlet (1)             | 566.7849  | 1.0000     | 0.0007 | 1.0000  | 2.2976   | 1.0000    | -0.0465 | 1.0000    | -0.0517 | 1.0000     | -1.3569  | 1.0000    | -0.2993  | 1.0000     | 4.6405 | 1.0000      |
| Daly_River (3) v. Indonesia (4)                 | 788.6998  | 0.2787     | 0.0005 | 0.3636  | NA       | NA        | NA      | NA        | NA      | NA         | NA       | NA        | NA       | NA         | NA     | NA          |
| Fiji (24) v. Indonesia (4)                      | 1624.5788 | 0.0010     | 0.0005 | 0.0010  | NA       | NA        | NA      | NA        | NA      | NA         | NA       | NA        | NA       | NA         | NA     | NA          |
| Indonesia (4) v. South_Africa (23)              | 1195.6827 | 0.0829     | 0.0003 | 0.0559  | NA       | NA        | NA      | NA        | NA      | NA         | NA       | NA        | NA       | NA         | NA     | NA          |
| Indonesia (4) v. Urauchi_River (35)             | 2021.5069 | 0.0010     | 0.0008 | 0.0010  | NA       | NA        | NA      | NA        | NA      | NA         | NA       | NA        | NA       | NA         | NA     | NA          |
| Sierra_Leone (1) v. Trinity_inlet (1)           | 566.6667  | 1.0000     | 0.0009 | 1.0000  | NA       | NA        | NA      | NA        | NA      | NA         | NA       | NA        | NA       | NA         | NA     | NA          |

## 9.8 PCA

```
pca1 <- adegenet::glPca(BS.dartcap.sub.gl, nf = 5, parallel = TRUE,  
                        n.cores = parallel::detectCores() - 1)  
save(pca1, file = "DARtcap_AUS_subset_PCA.Rdata")
```

```
load("DARtcap_AUS_subset_PCA.Rdata")
```

```
BS.pca.scores <- as.data.frame(pca1$scores)  
BS.pca.scores$pop <- pop(BS.dartcap.sub.gl)  
cols <- adegenet::funky(nPop(BS.dartcap.sub.gl))
```

```
p <-  
ggplot2::ggplot(BS.pca.scores, ggplot2::aes(x = PC1, y = PC2, colour = pop)) +  
ggplot2::geom_point(size = 2) + ggplot2::scale_color_manual(values = cols) +  
ggplot2::geom_hline(yintercept = 0) + ggplot2::geom_vline(xintercept = 0) +  
ggplot2::theme_minimal() +  
ggplot2::theme(  
  axis.text = ggplot2::element_text(size = 5),  
  axis.title.x = ggplot2::element_text(size = 10),  
  axis.title.y = ggplot2::element_text(size = 10),  
  legend.text = ggplot2::element_text(size = 7)  
)  
p
```

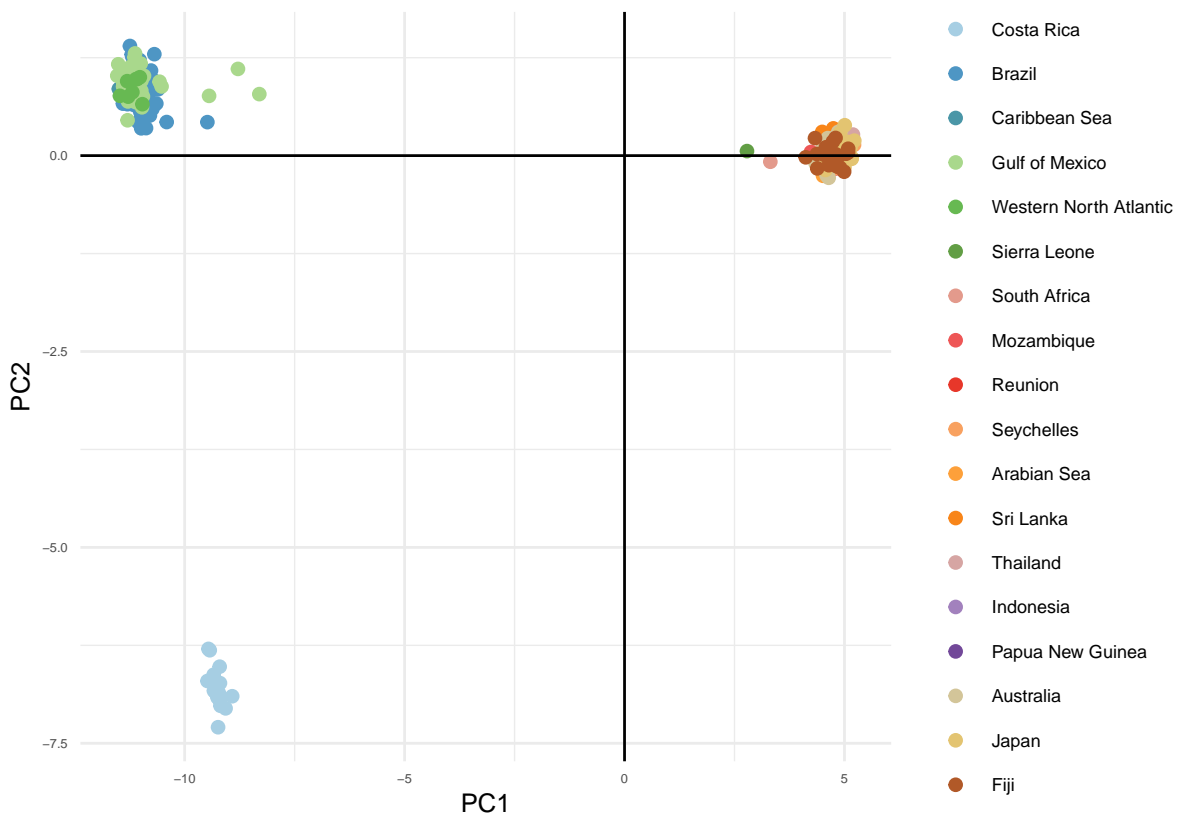

```
ggplot2::ggsave(p, filename = "DARtcap_AUS_subset_PCA1.png", width = 30,  
                height = 15, units = "cm")
```

```
p <-  
ggplot2::ggplot(BS.pca.scores, ggplot2::aes(x = PC1, y = PC3, colour = pop)) +
```

```

ggplot2::geom_point(size = 2) + ggplot2::scale_color_manual(values = cols) +
ggplot2::geom_hline(yintercept = 0) + ggplot2::geom_vline(xintercept = 0) +
ggplot2::theme_minimal() +
ggplot2::theme(
  axis.text = ggplot2::element_text(size = 5),
  axis.title.x = ggplot2::element_text(size = 10),
  axis.title.y = ggplot2::element_text(size = 10),
  legend.text = ggplot2::element_text(size = 7)
)

```

p

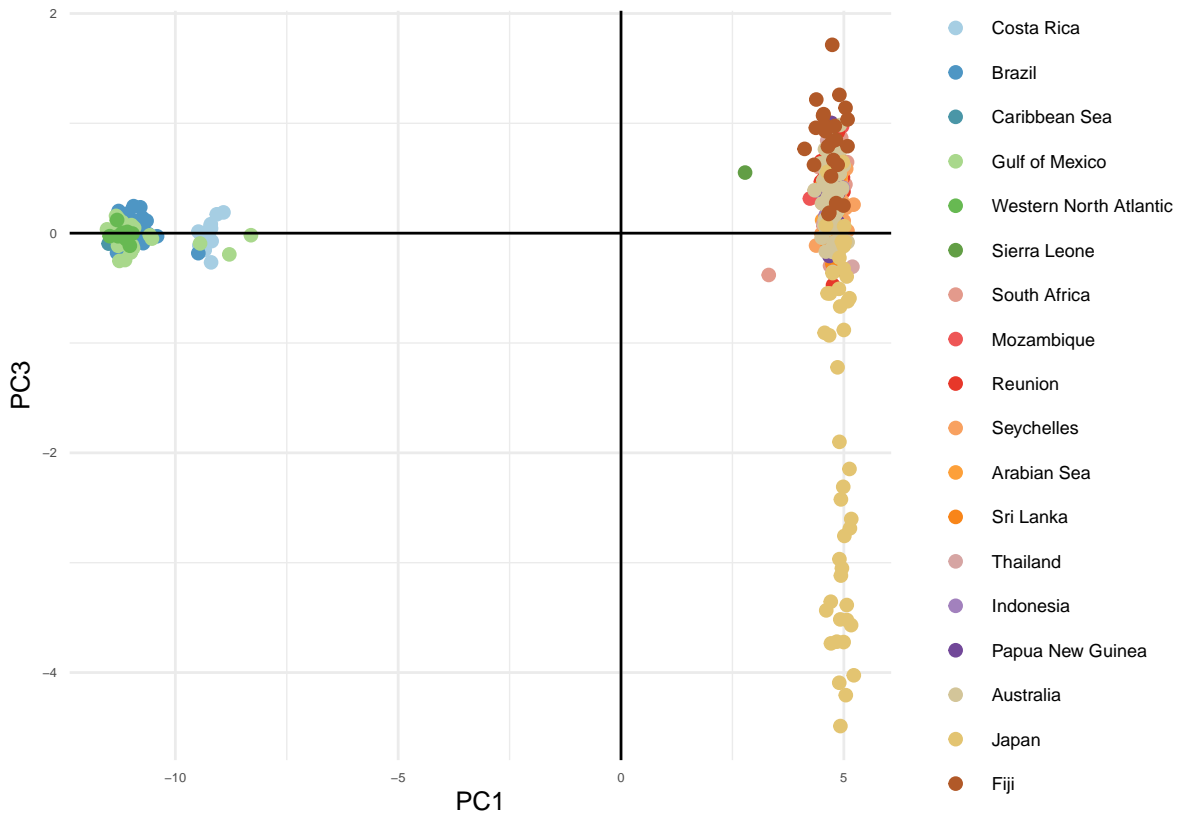

```

ggplot2::ggsave(p, filename = "DArTcap_AUS_subset_PCA2.png", width = 30,
  height = 15, units = "cm")

```

```

p <-
ggplot2::ggplot(BS.pca.scores, ggplot2::aes(x = PC2, y = PC3, colour = pop)) +
ggplot2::geom_point(size = 2) + ggplot2::scale_color_manual(values = cols) +
ggplot2::geom_hline(yintercept = 0) + ggplot2::geom_vline(xintercept = 0) +
ggplot2::theme_minimal() +
ggplot2::theme(
  axis.text = ggplot2::element_text(size = 5),
  axis.title.x = ggplot2::element_text(size = 10),
  axis.title.y = ggplot2::element_text(size = 10),
  legend.text = ggplot2::element_text(size = 7)
)

```

p

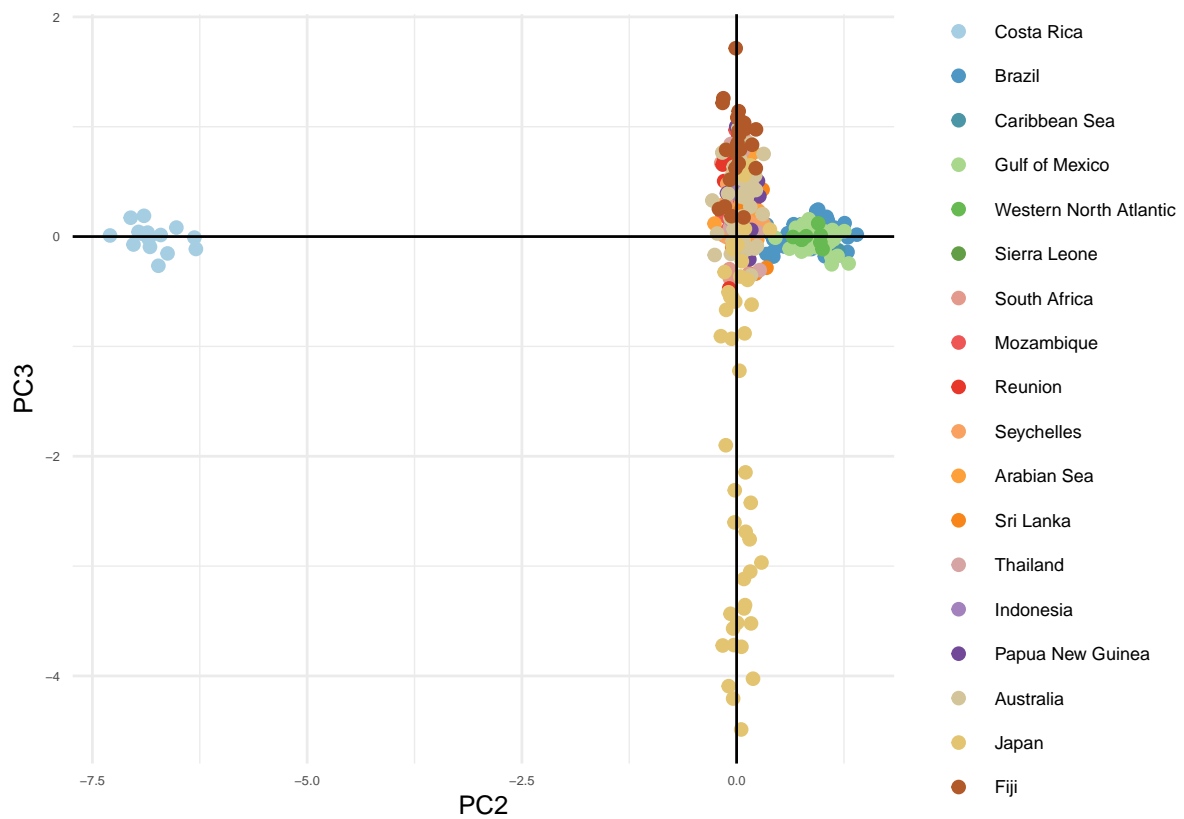

```
ggplot2::ggsave(p, filename = "DArTcap_AUS_subset_PCA3.png", width = 30,
  height = 15, units = "cm")
```

```
p <-
ggplot2::ggplot(BS.pca.scores, ggplot2::aes(x = PC3, y = PC4, colour = pop)) +
ggplot2::geom_point(size = 2) + ggplot2::scale_color_manual(values = cols) +
ggplot2::geom_hline(yintercept = 0) + ggplot2::geom_vline(xintercept = 0) +
ggplot2::theme_minimal() +
ggplot2::theme(
  axis.text = ggplot2::element_text(size = 5),
  axis.title.x = ggplot2::element_text(size = 10),
  axis.title.y = ggplot2::element_text(size = 10),
  legend.text = ggplot2::element_text(size = 7)
)
p
```

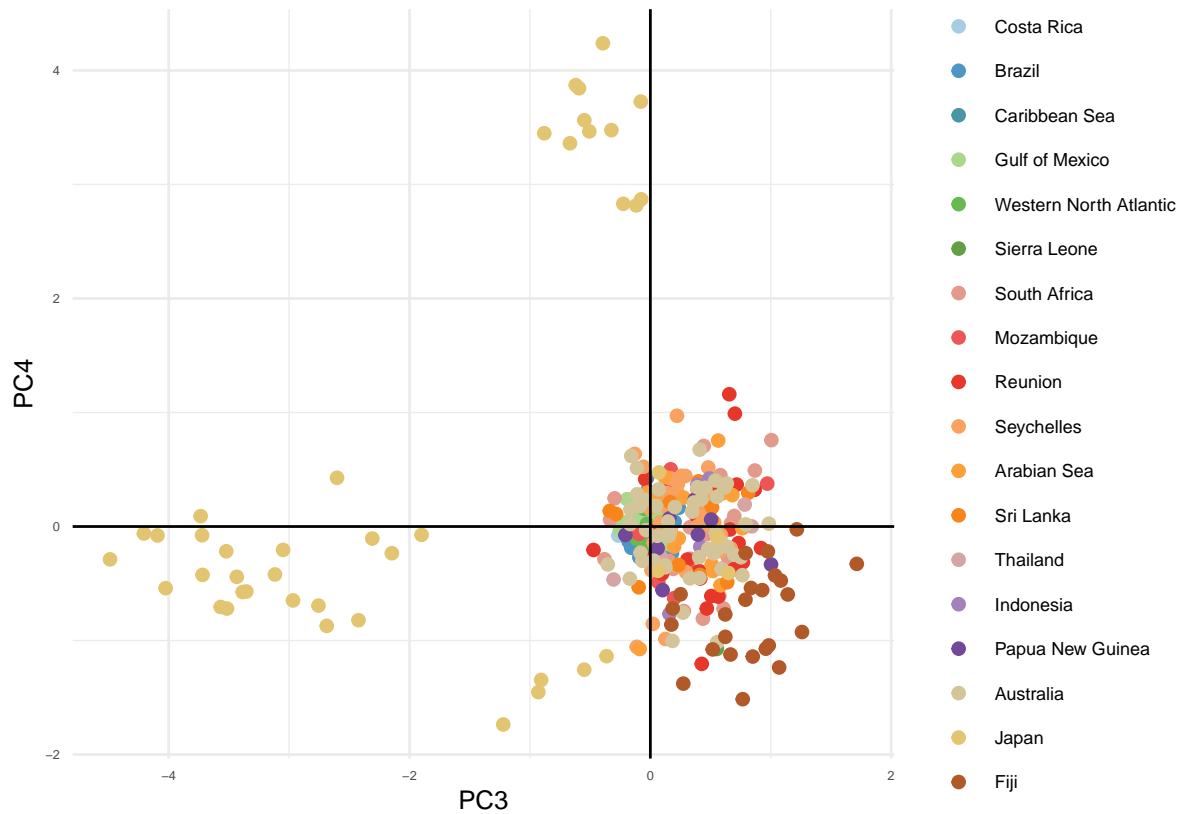

```
ggplot2::ggsave(p, filename = "DArTcap_AUS_subset_PCA4.png", width = 30,
  height = 15,units = "cm")
```

```
p <-
ggplot2::ggplot(BS.pca.scores, ggplot2::aes(x = PC3, y = PC5, colour = pop)) +
ggplot2::geom_point(size = 2) + ggplot2::scale_color_manual(values = cols) +
ggplot2::geom_hline(yintercept = 0) + ggplot2::geom_vline(xintercept = 0) +
ggplot2::theme_minimal() +
ggplot2::theme(
  axis.text = ggplot2::element_text(size = 5),
  axis.title.x = ggplot2::element_text(size = 10),
  axis.title.y = ggplot2::element_text(size = 10),
  legend.text = ggplot2::element_text(size = 7)
)
p
```



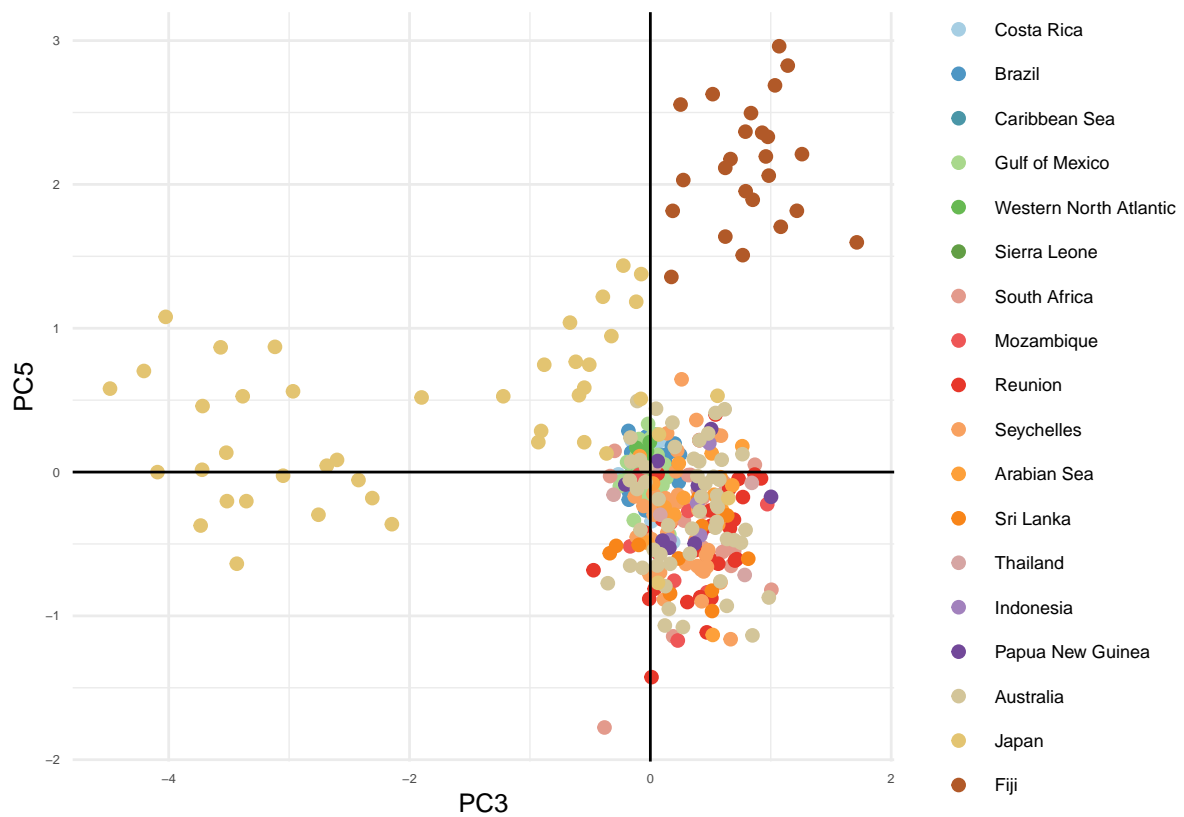

```
ggplot2::ggsave(p, filename = "DArTcap_AUS_subset_PCA5.png", width = 30,
  height = 15,units = "cm")
```

```
p <-
ggplot2::ggplot(BS.pca.scores, ggplot2::aes(x = PC4, y = PC5, colour = pop)) +
ggplot2::geom_point(size = 2) + ggplot2::scale_color_manual(values = cols) +
ggplot2::geom_hline(yintercept = 0) + ggplot2::geom_vline(xintercept = 0) +
ggplot2::theme_minimal() +
ggplot2::theme(
  axis.text = ggplot2::element_text(size = 5),
  axis.title.x = ggplot2::element_text(size = 10),
  axis.title.y = ggplot2::element_text(size = 10),
  legend.text = ggplot2::element_text(size = 7)
)
p
```

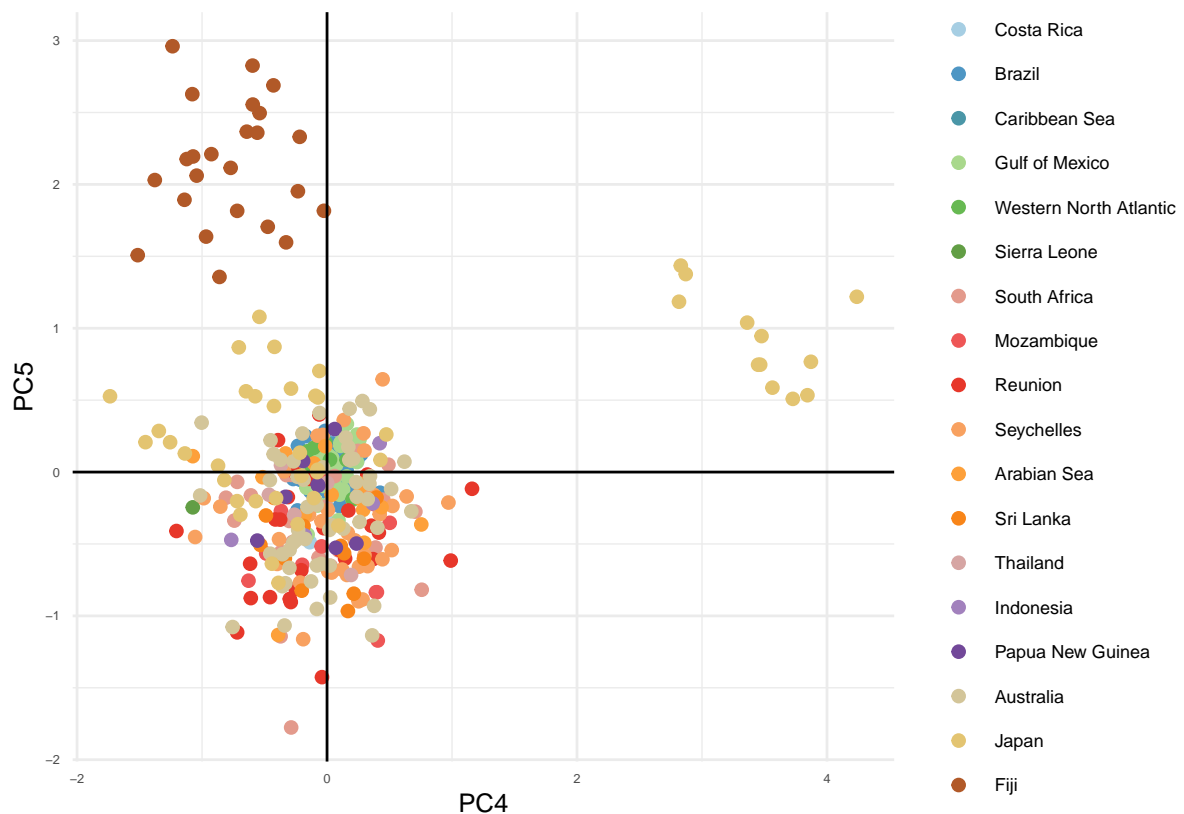

```
ggplot2::ggsave(p, filename = "DArTcap_AUS_subset_PCA6.png", width = 30,
  height = 15, units = "cm")
```

## 9.9 DAPC

### 9.9.1 Optimal number of clusters with neutral markers

```
set.seed(124)
grp <-
  adegenet::find.clusters(
    BS.dartcap.sub.gl,
    max.n.clust = 18,
    n.pca = adegenet::nInd(BS.dartcap.sub.gl) / 3,
    stat = "BIC",
    parallel = TRUE,
    n.cores = parallel::detectCores() - 1
  )
```

```
save(grp, file = "DArTcap_AUS_subset_grp_.Rdata")
```

```
load("DArTcap_AUS_subset_grp_.Rdata")
```

```
y <- as.numeric(grp$Kstat)
x <- 1:18
data <- data.frame(x,y,stringsAsFactors = F)
plot <- ggplot2::ggplot(data, ggplot2::aes(x,y)) +
  ggplot2::geom_point(size = 5, shape = 1, color = "blue") +
  ggplot2::geom_line(size = 1,color = "blue") +
  ggplot2::scale_x_continuous(name = waiver(),
    breaks = seq(from = 0,
      to = nrow(BS.dartcap.sub.gl) - 1,
```

```

                                by = 1)) +
ggplot2::labs(subtitle = "",
              y = "Bayesian Information Criterion",
              x = "Number of clusters",
              title = "",
              caption = "") +
ggplot2::theme_classic() +
ggplot2::theme(
  axis.text = ggplot2::element_text(size = 5),
  axis.title.x = ggplot2::element_text(size = 20,vjust = 0, hjust = 0.5),
  axis.title.y = ggplot2::element_text(size = 20,vjust = 2, hjust = 0.5))
print(plot)

```

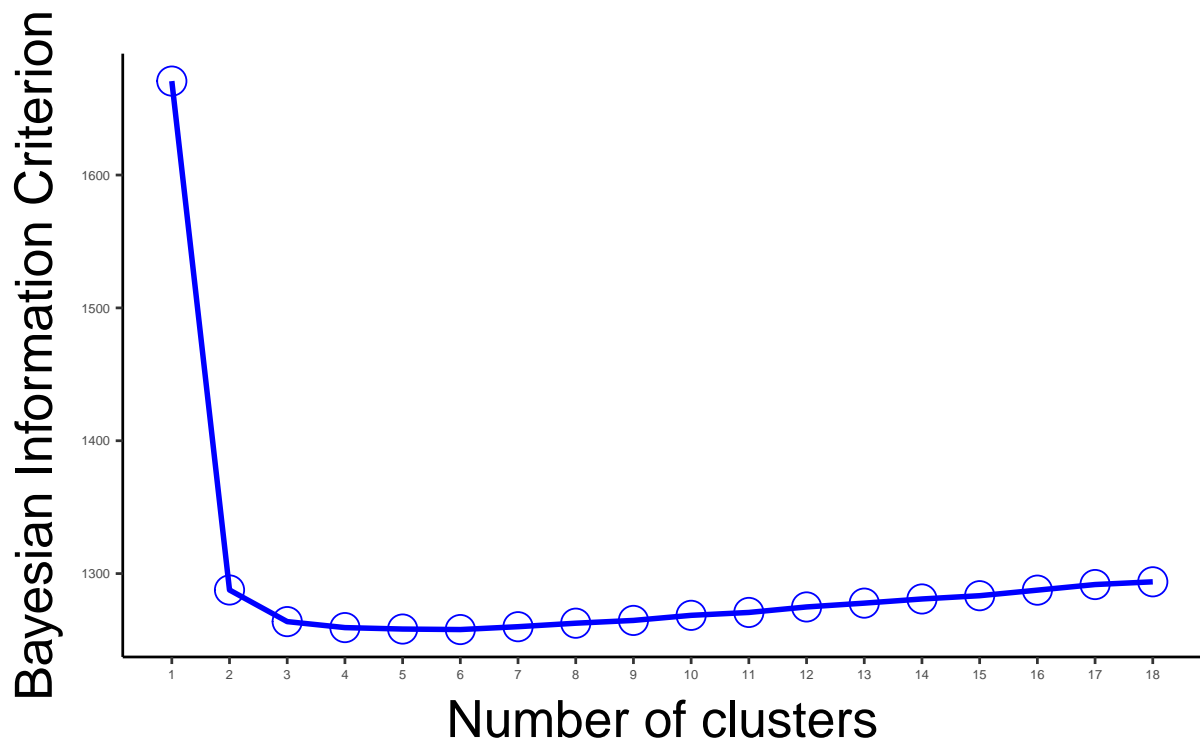

```

ggplot2::ggsave(plot, filename = "DARTcap_AUS_subset_grp.png", width = 30,
                height = 15,units = "cm")

```

### 9.9.2 Cross-validation to identify the optimal number of PCs

Uses a training - holdout set of individuals to check how reliable individuals can be assigned.

```

set.seed(124)
x <- BS.dartcap.sub.gl
x <- x[x$pop != "Sierra Leone",]

xval <-
  adegenet::xvalDapc(
    tab(x, NA.method = "mean"),
    adegenet::pop(x),
    n.pca = seq(1, adegenet::nInd(x), by = 50),
    training.set = 0.9,
    result = "groupMean",
    center = TRUE,

```

```

scale = FALSE,
n.rep = 1000,
parallel = "multicore",
ncpus = 1,
xval.plot = TRUE
)
print(xval[2:6])
PC <- as.numeric(xval$`Number of PCs Achieving Lowest MSE`)

#refine the analysis
set.seed(124)
png(file="DARtcap_AUS_subset_xval.png")
xval <-
  adegenet::xvalDapc(
    tab(x, NA.method = "mean"),
    adegenet::pop(x),
    n.pca = (PC - 15):(PC + 15),
    n.rep = 1000,
    parallel = "multicore",
    ncpus = 1,
    xval.plot = TRUE
  )
dev.off()
save(xval, file = "DARtcap_AUS_subset_xval.rdata")

load("DARtcap_AUS_subset_xval.rdata")
print(xval[2:6])
PC <- as.numeric(xval$`Number of PCs Achieving Lowest MSE`)

## $`Median and Confidence Interval for Random Chance`
##      2.5%      50%      97.5%
## 0.03861550 0.05695908 0.08868781
##
## $`Mean Successful Assignment by Number of PCs of PCA`
##      36      37      38      39      40      41      42      43
## 0.3338533 0.3343388 0.3376489 0.3371772 0.3356450 0.3439839 0.3454886 0.3482663
##      44      45      46      47      48      49      50      51
## 0.3494908 0.3464274 0.3467327 0.3502776 0.3493193 0.3541947 0.3556213 0.3585058
##      52      53      54      55      56      57      58      59
## 0.3548909 0.3550931 0.3545634 0.3529064 0.3560120 0.3526906 0.3537629 0.3516880
##      60      61      62      63      64      65      66
## 0.3503346 0.3497025 0.3500120 0.3511077 0.3515862 0.3513141 0.3521010
##
## $`Number of PCs Achieving Highest Mean Success`
## [1] "51"
##
## $`Root Mean Squared Error by Number of PCs of PCA`
##      36      37      38      39      40      41      42      43
## 0.6665824 0.6660893 0.6627735 0.6632440 0.6647774 0.6564674 0.6550179 0.6522013
##      44      45      46      47      48      49      50      51
## 0.6509811 0.6540736 0.6537285 0.6502198 0.6511483 0.6462868 0.6448894 0.6419722
##      52      53      54      55      56      57      58      59
## 0.6456393 0.6453911 0.6459184 0.6475422 0.6444630 0.6478024 0.6467376 0.6487830
##      60      61      62      63      64      65      66
## 0.6501345 0.6507866 0.6504542 0.6494049 0.6489529 0.6491762 0.6484199
##
## $`Number of PCs Achieving Lowest MSE`
## [1] "51"

```

```

dapc.all.object.names <- c()
for (K in 2:10) {
  set.seed(124)
  grp <- adegenet::find.clusters(BS.dartcap.sub.gl, n.clust = K, n.pca = PC)
  set.seed(124)
  dapc.all.neutral <- adegenet::dapc(BS.dartcap.sub.gl, grp$grp, n.da = K - 1,
                                     n.pca = PC)
  assign(paste0("dapc.all.", K), value = dapc.all.neutral)
  dapc.all.object.names <- c(dapc.all.object.names,
                             paste0("dapc.all.", K))
}
save(list = dapc.all.object.names, dapc.all.object.names,
     file = "DARtcap_AUS_subset_DAPC.Rdata")

```

### 9.9.3 DAPC barplot

Group individuals according to DAPC posterior membership.

```

load("DARtcap_AUS_subset_DAPC.Rdata")
for (K in 2:10) {
  colour <- colours.prior[1:K]
  dapc <- get(dapc.all.object.names[K - 1])
  post <- as.matrix(dapc$posterior)
  colnames(post) <- paste0("Group", 1:nlevels(dapc$grp))
  locations <- BS.dartcap.sub.gl$pop

  plot.dapc.FDD(x = post,
                locations = locations,
                colour = colour,
                region.lwd = 1,
                plotTitle = paste0("DAPC: all Bull Sharks - subset Australia\n for K=",
                                   K, " & PC=", PC, sep = ""))

  dev.print(
    device = png,
    file = paste0("DARtcap_AUS_subset_DAPC_barplot_K", K, ".png"),
    res = 300,
    width = 30,
    height = 15,
    units = "cm")
}

```

## DAPC: all Bull Sharks – subset Australia for K=2 & PC=51

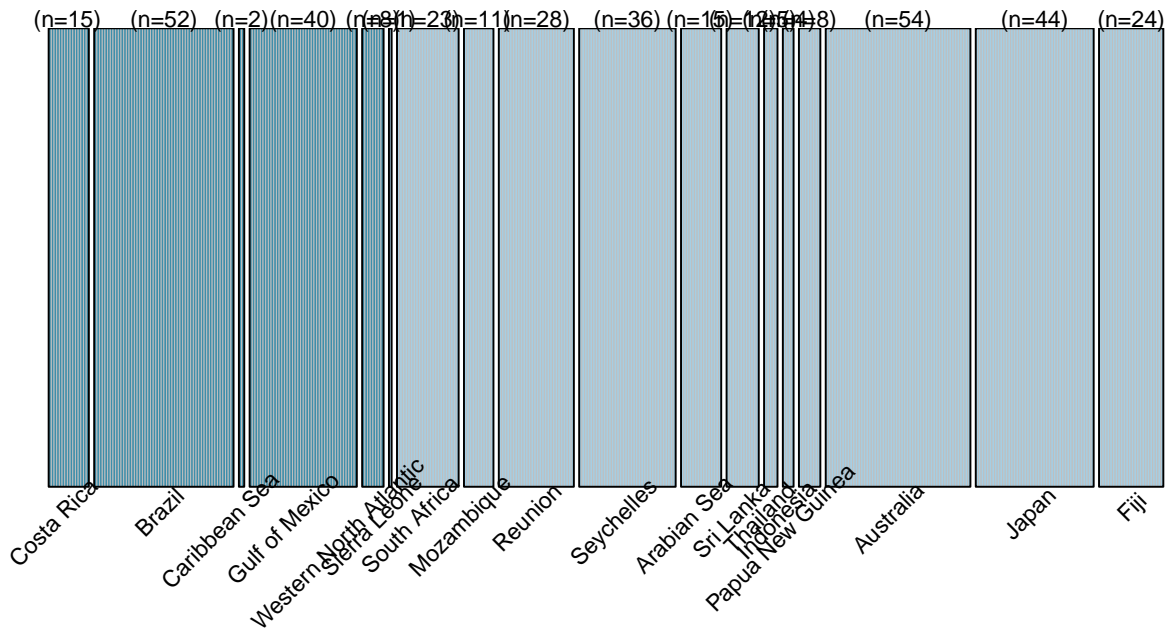

## DAPC: all Bull Sharks – subset Australia for K=3 & PC=51

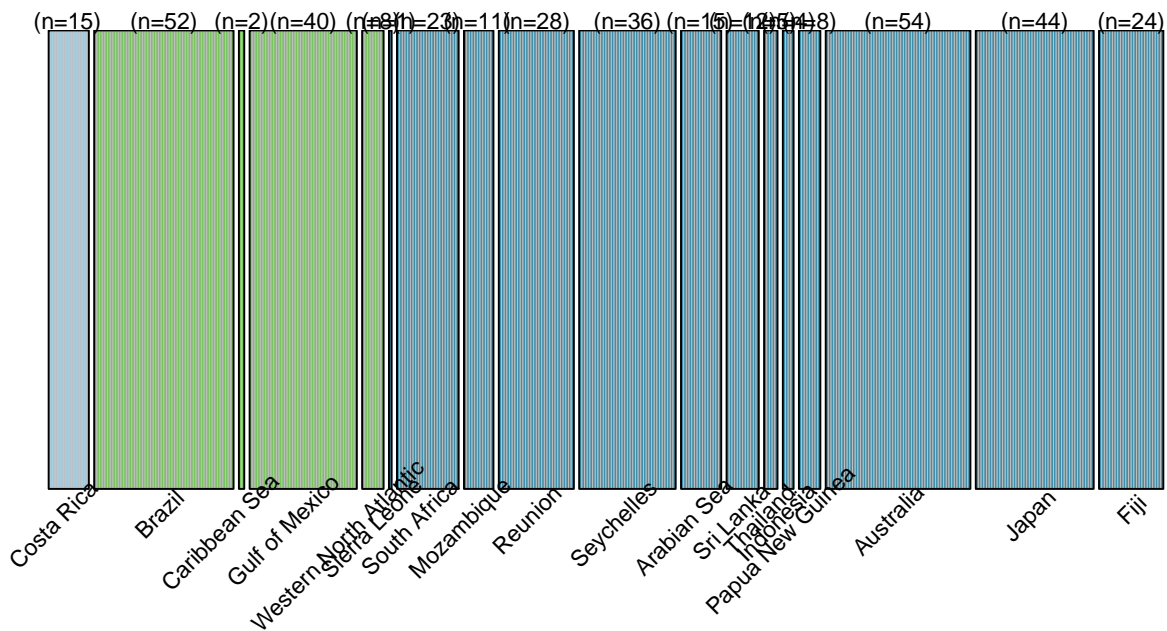

## DAPC: all Bull Sharks – subset Australia for K=4 & PC=51

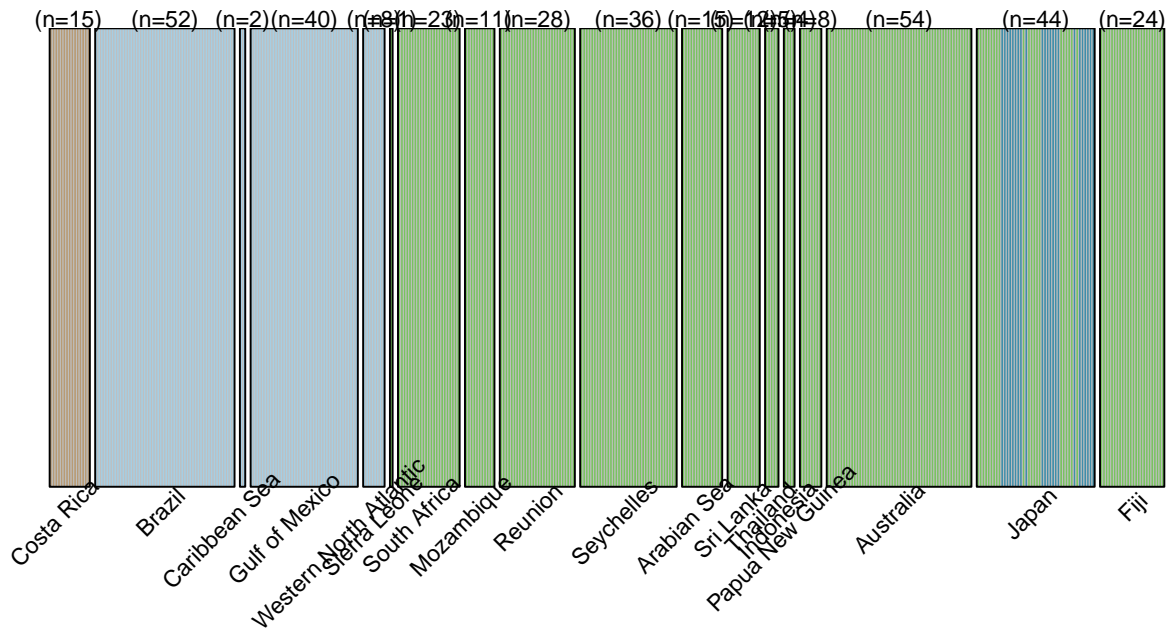

## DAPC: all Bull Sharks – subset Australia for K=5 & PC=51

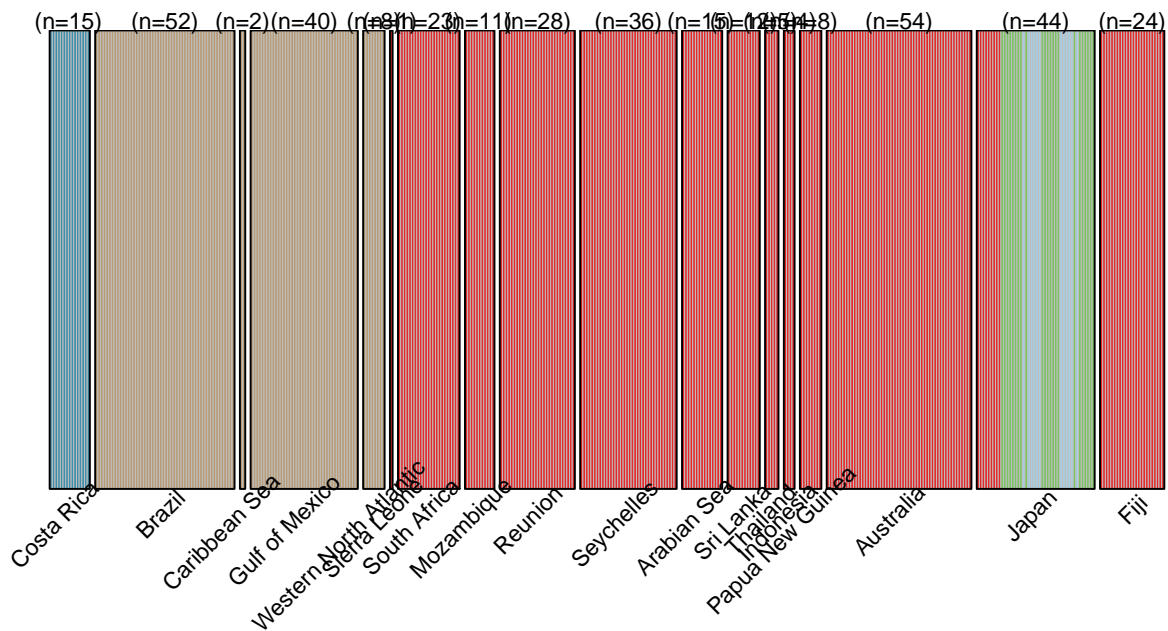

## DAPC: all Bull Sharks – subset Australia for K=6 & PC=51

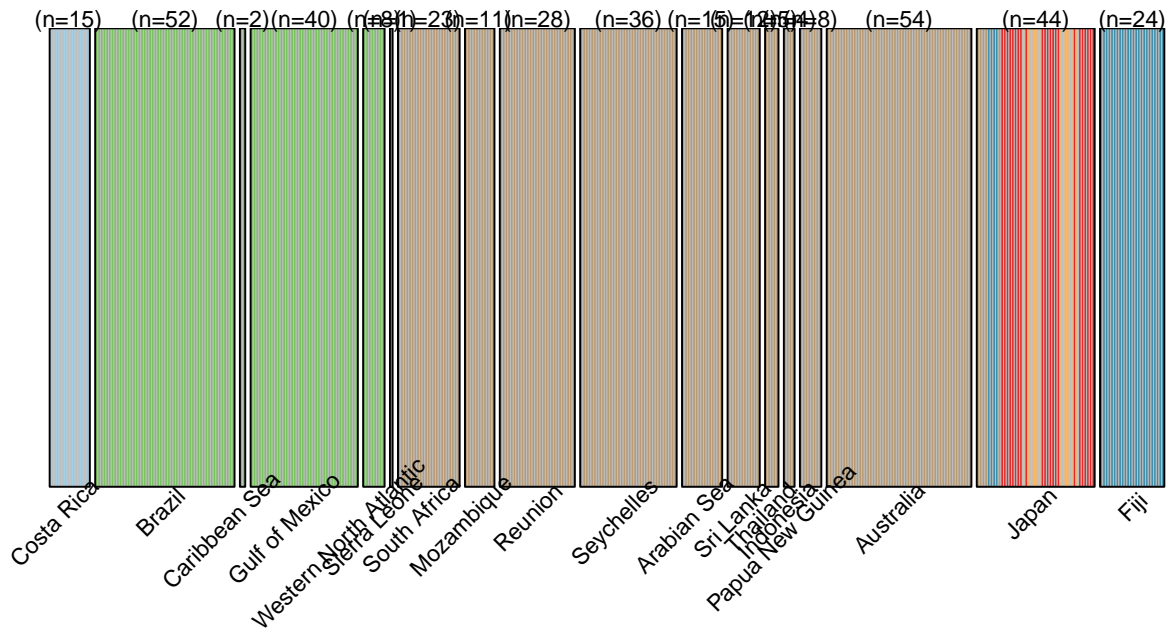

## DAPC: all Bull Sharks – subset Australia for K=7 & PC=51

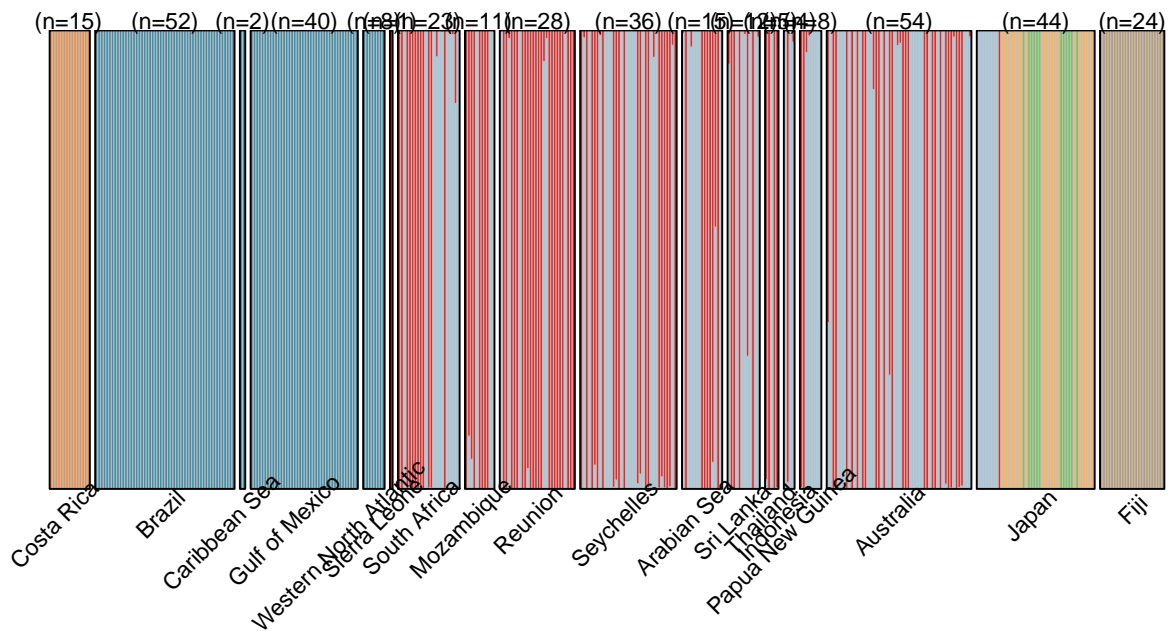



## DAPC: all Bull Sharks – subset Australia for K=8 & PC=51

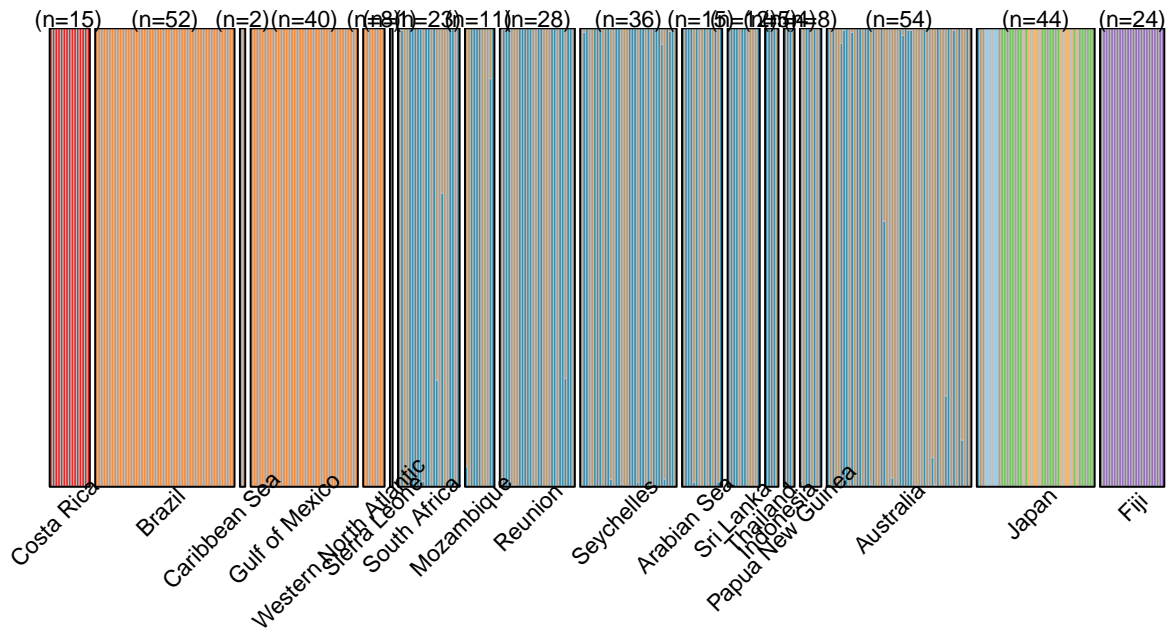

## DAPC: all Bull Sharks – subset Australia for K=9 & PC=51

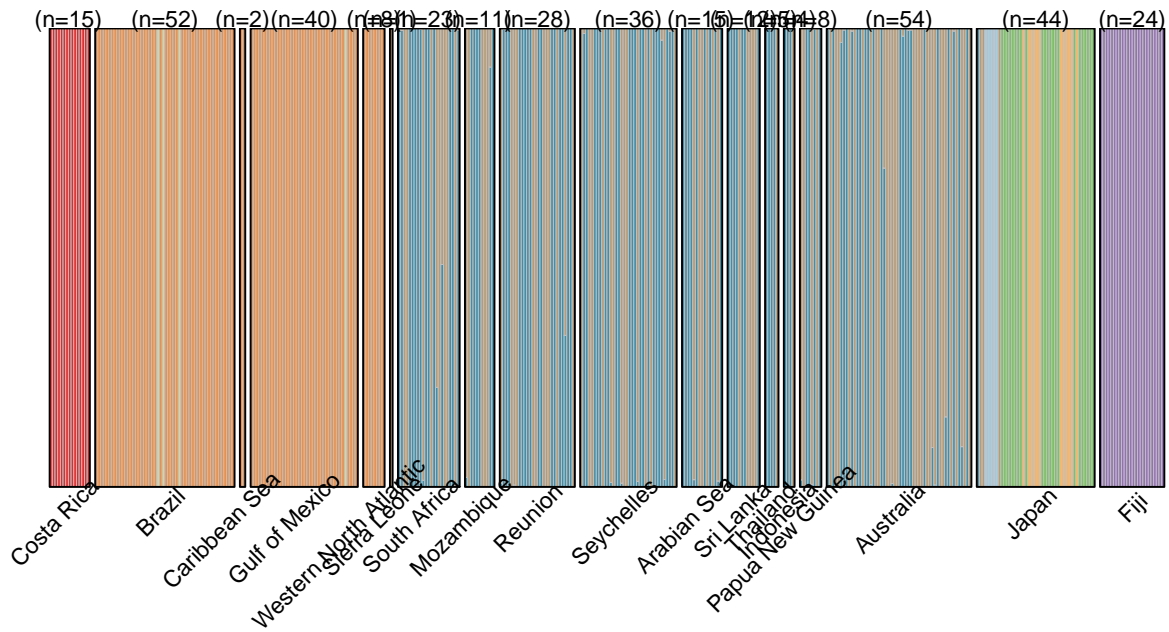

## DAPC: all Bull Sharks – subset Australia for K=10 & PC=51

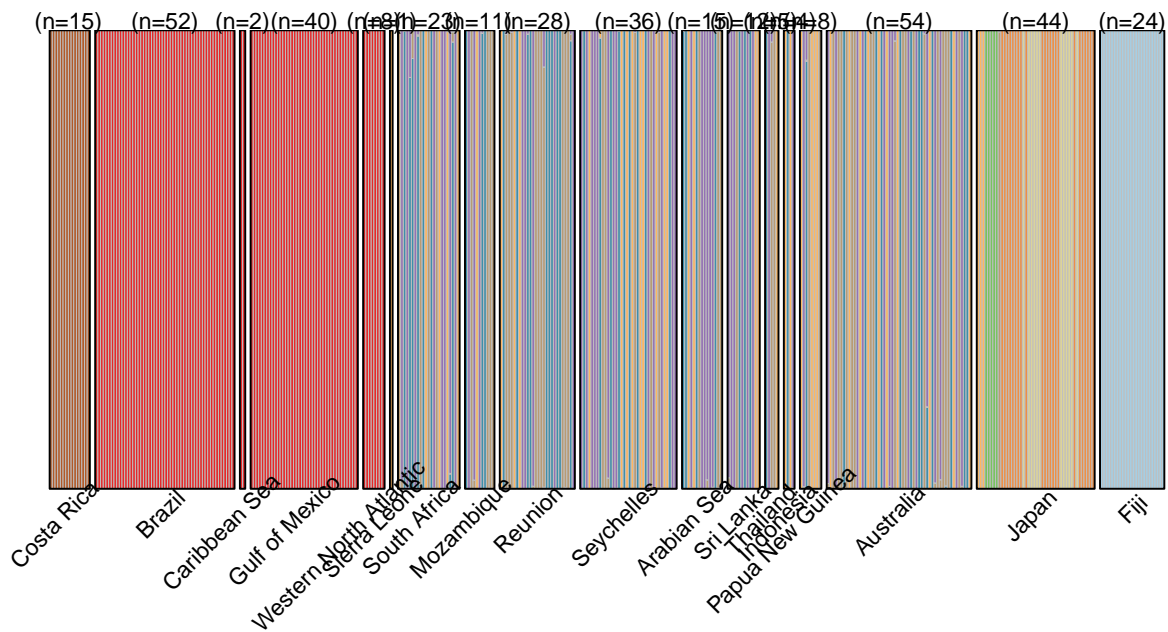

### 9.9.4 DAPC scatterplot

```
load("DARtcap_AUS_subset_DAPC.Rdata")

for (K in 3:10) {
  dapc <- get(dapc.all.object.names[K - 1])
  if (K == 2) {
    posi.leg <- "bottomright"
  } else {posi.leg <- "bottomleft"}
  dapc.plot <- ade4::scatter(dapc, grp = pop(BS.dartcap.sub.gl), cex = 2,
    legend = TRUE, col = colours.14, clabel = FALSE,
    posi.leg = posi.leg, scree.pca = FALSE,
    posi.pca = "topleft", cleg = 0.75, xax = 1,
    yax = 2, inset.solid = 0.3)

  dev.print(
    device = png,
    file = paste0("DARtcap_AUS_subset_DAPC_scatterplot_K", K, ".png"),
    width = 30,
    height = 15,
    units = "cm",
    res = 300
  )
}
```

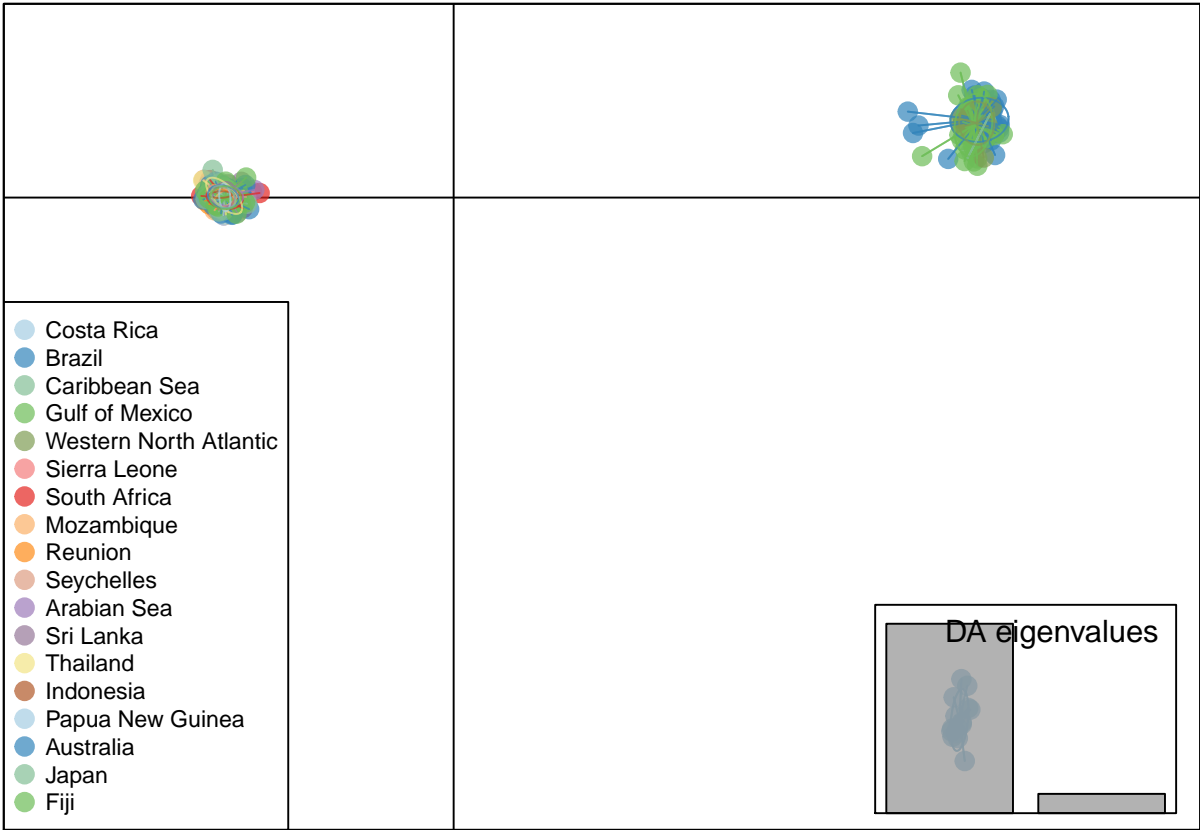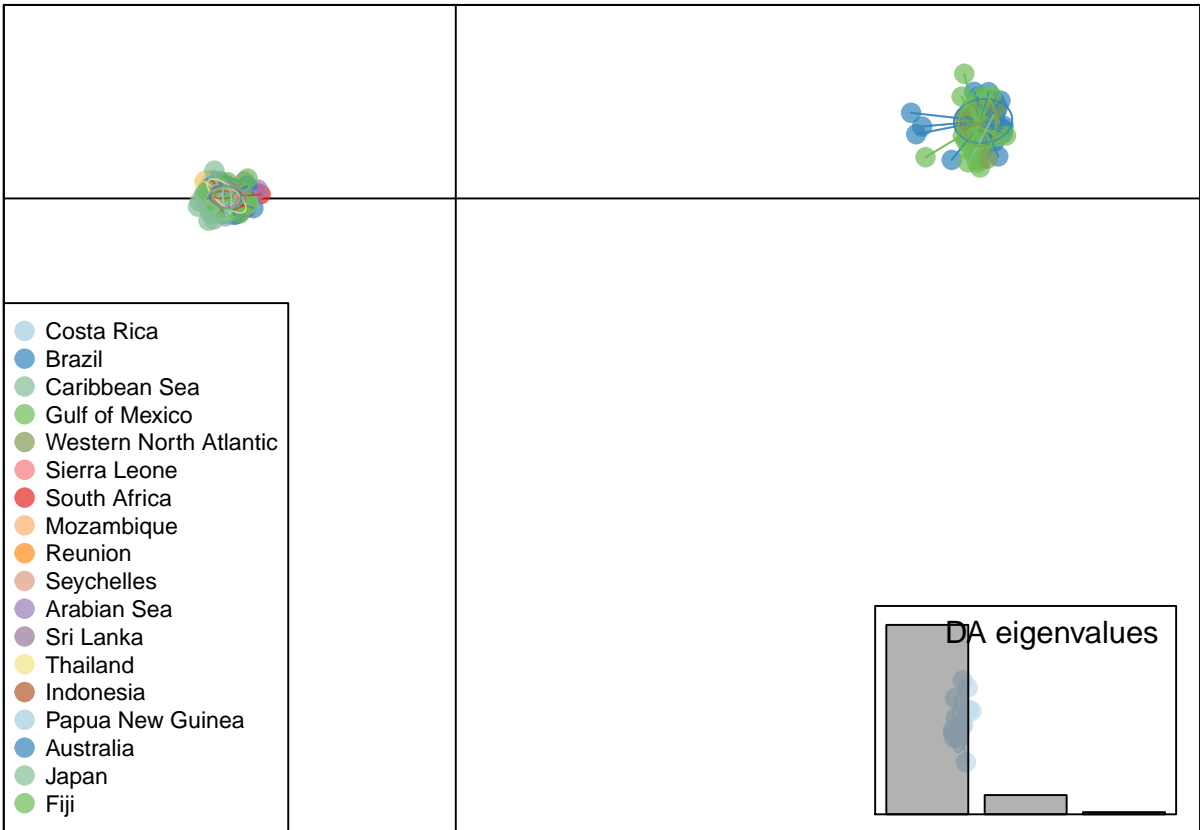

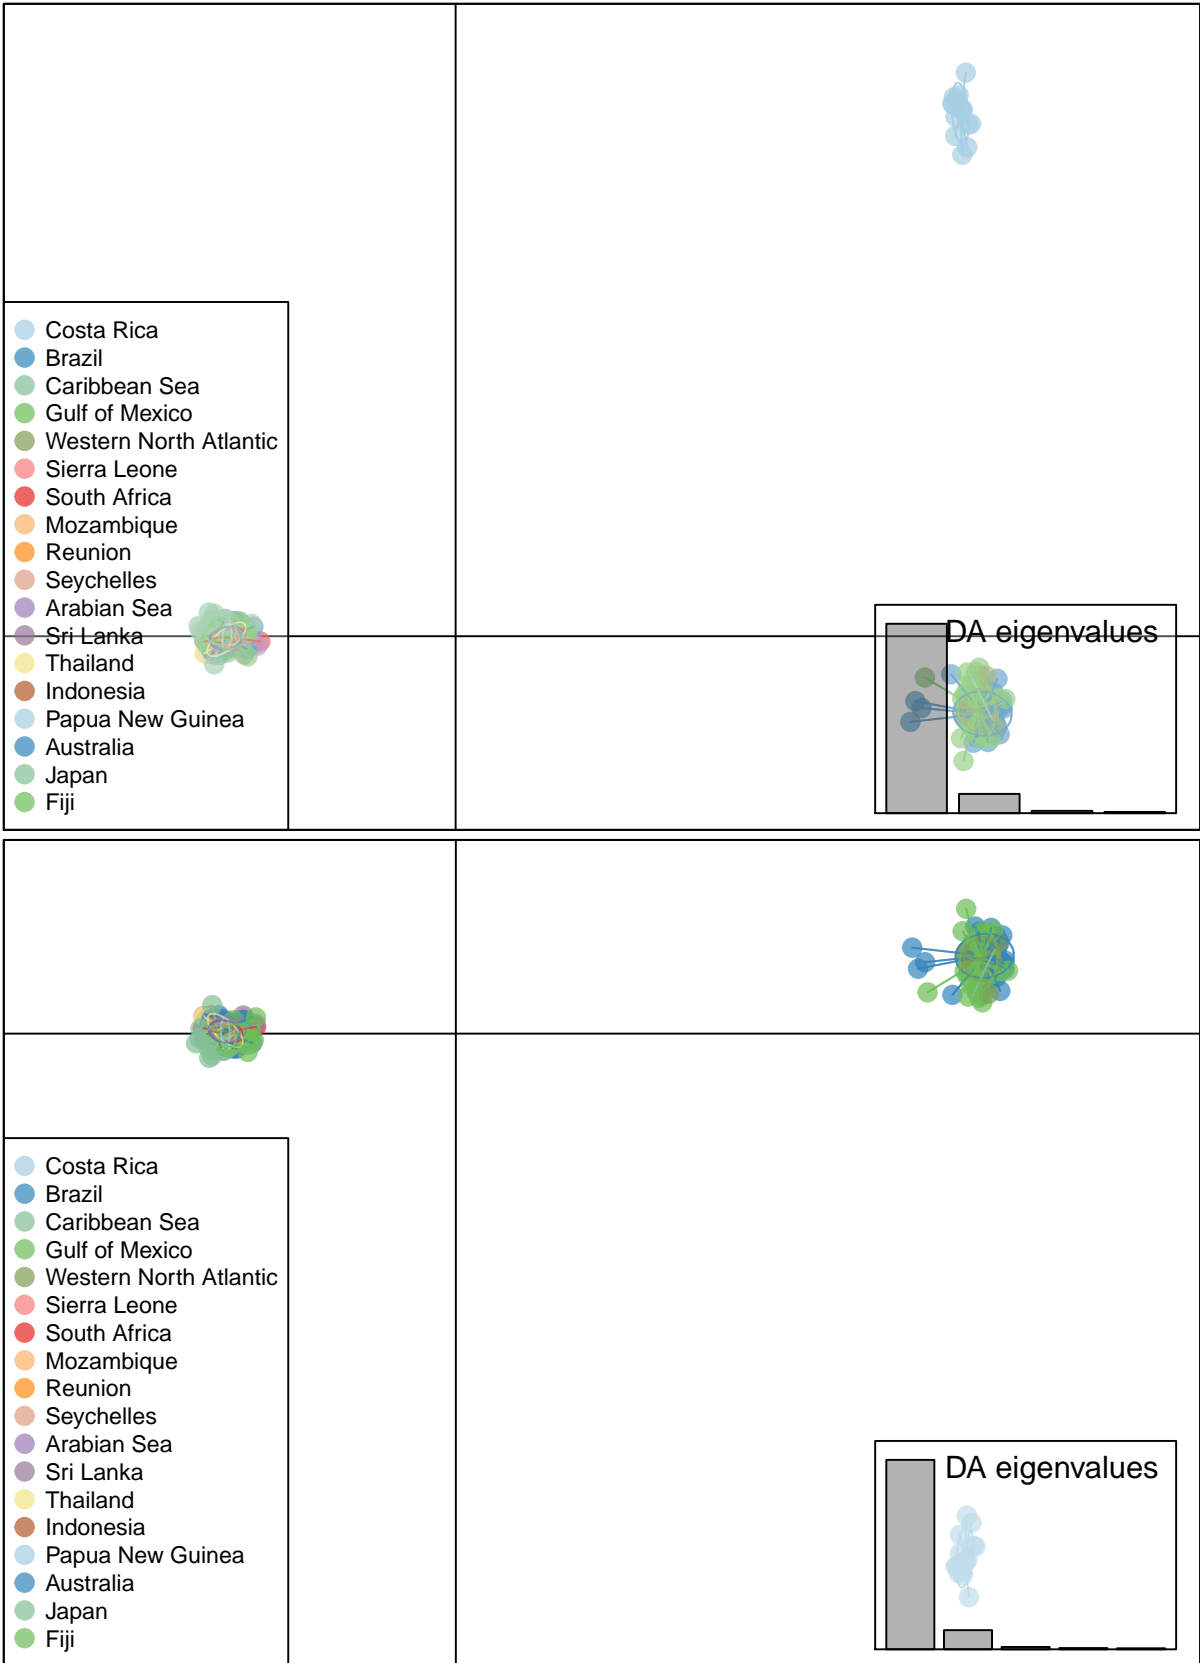

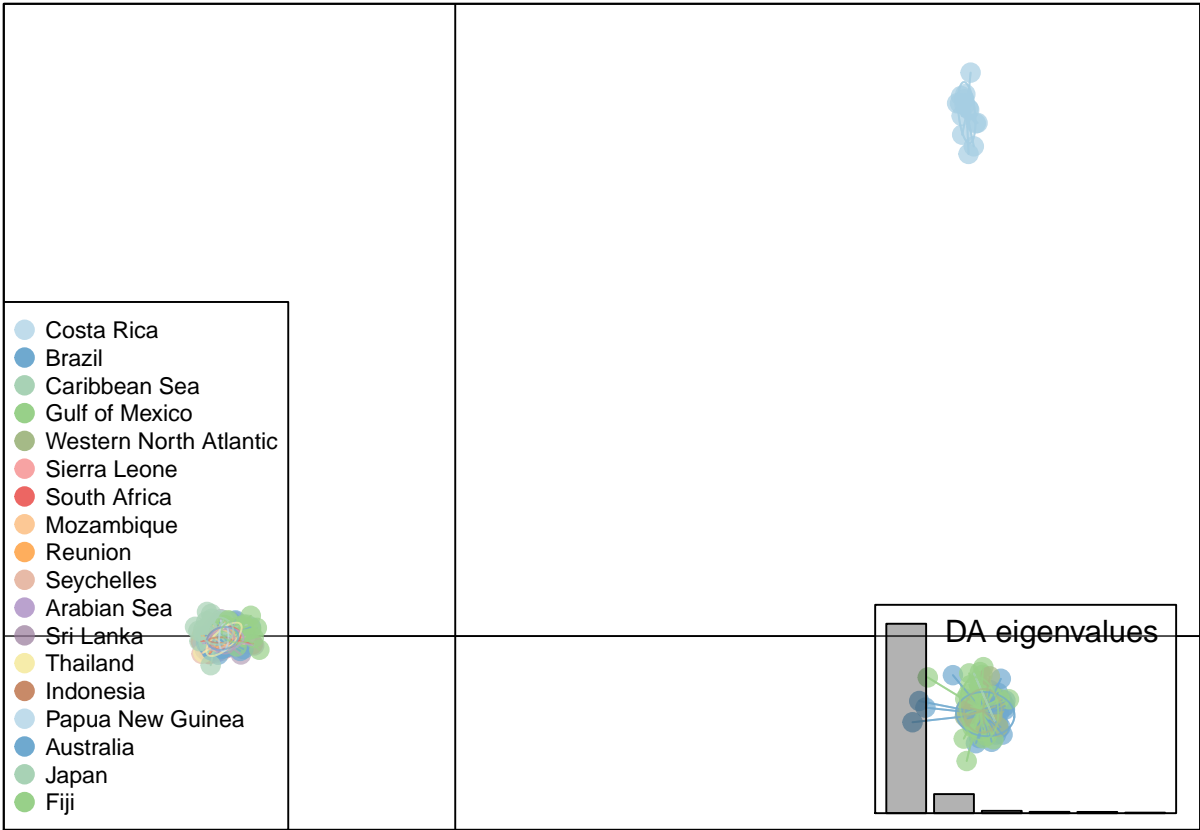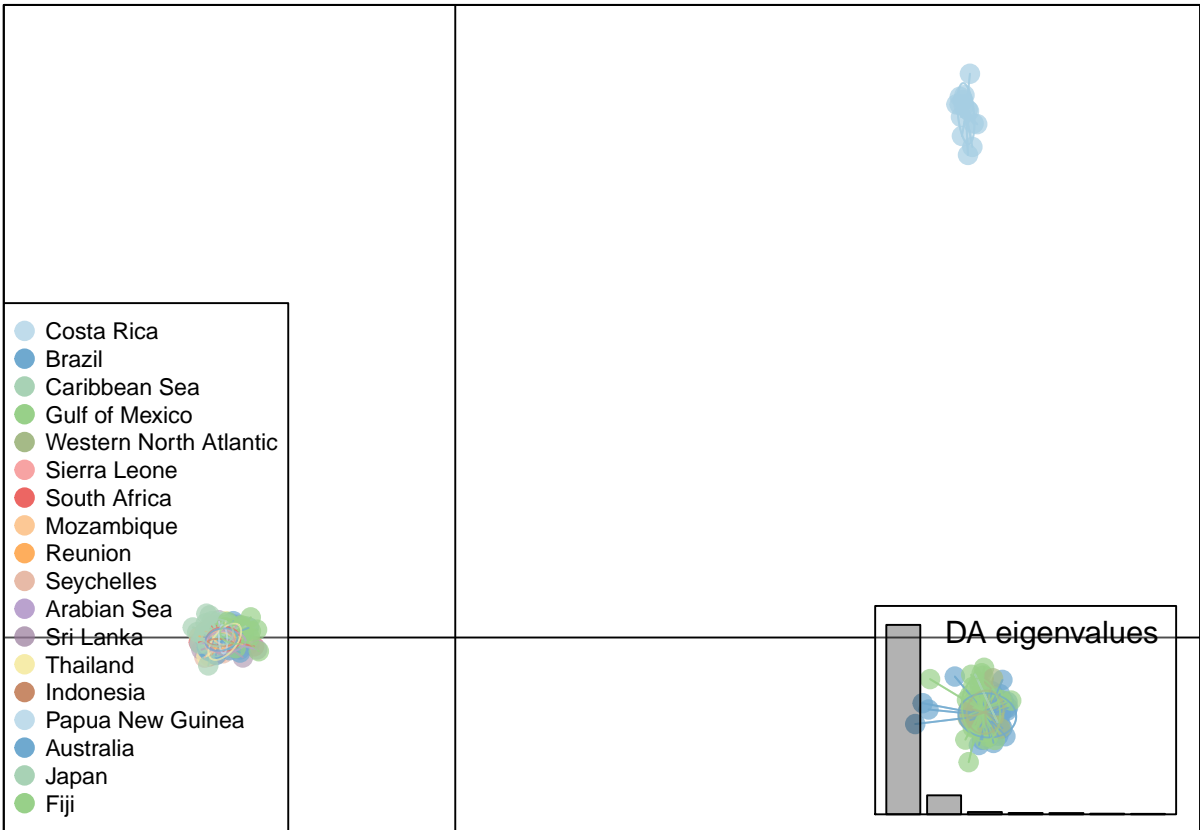

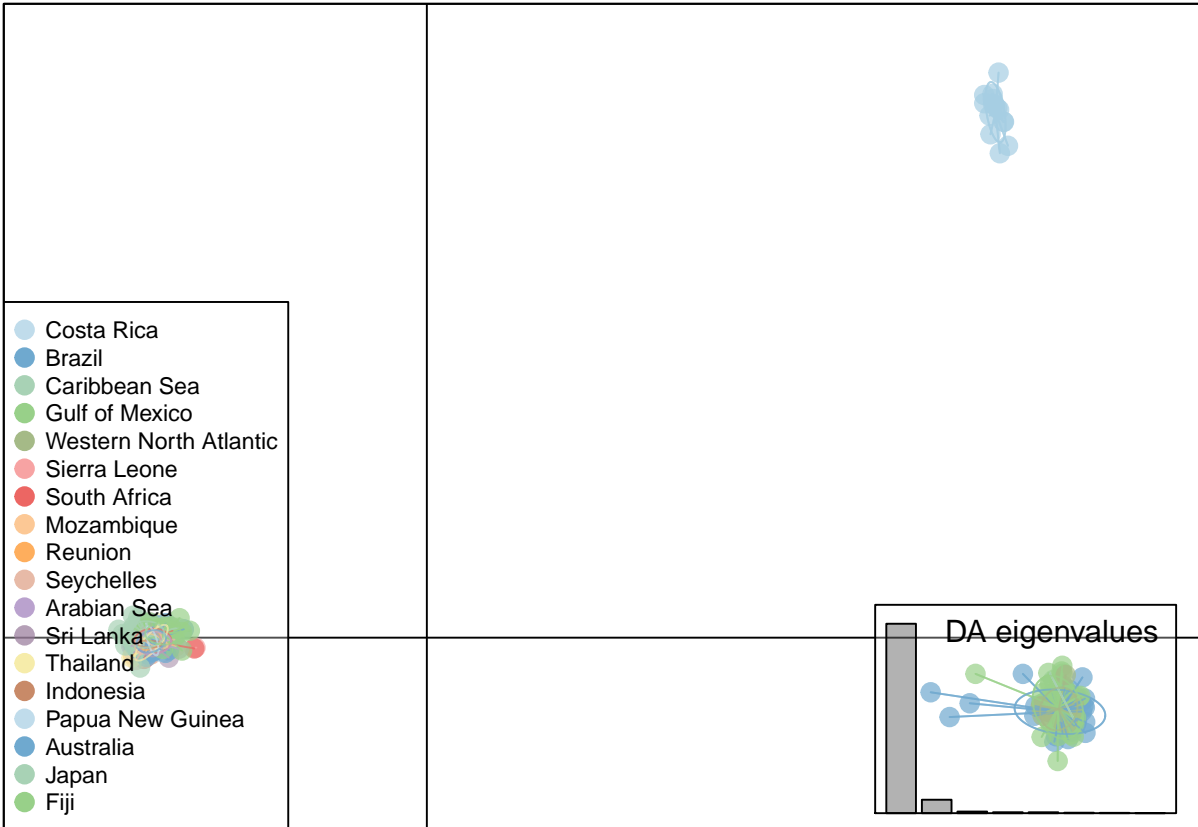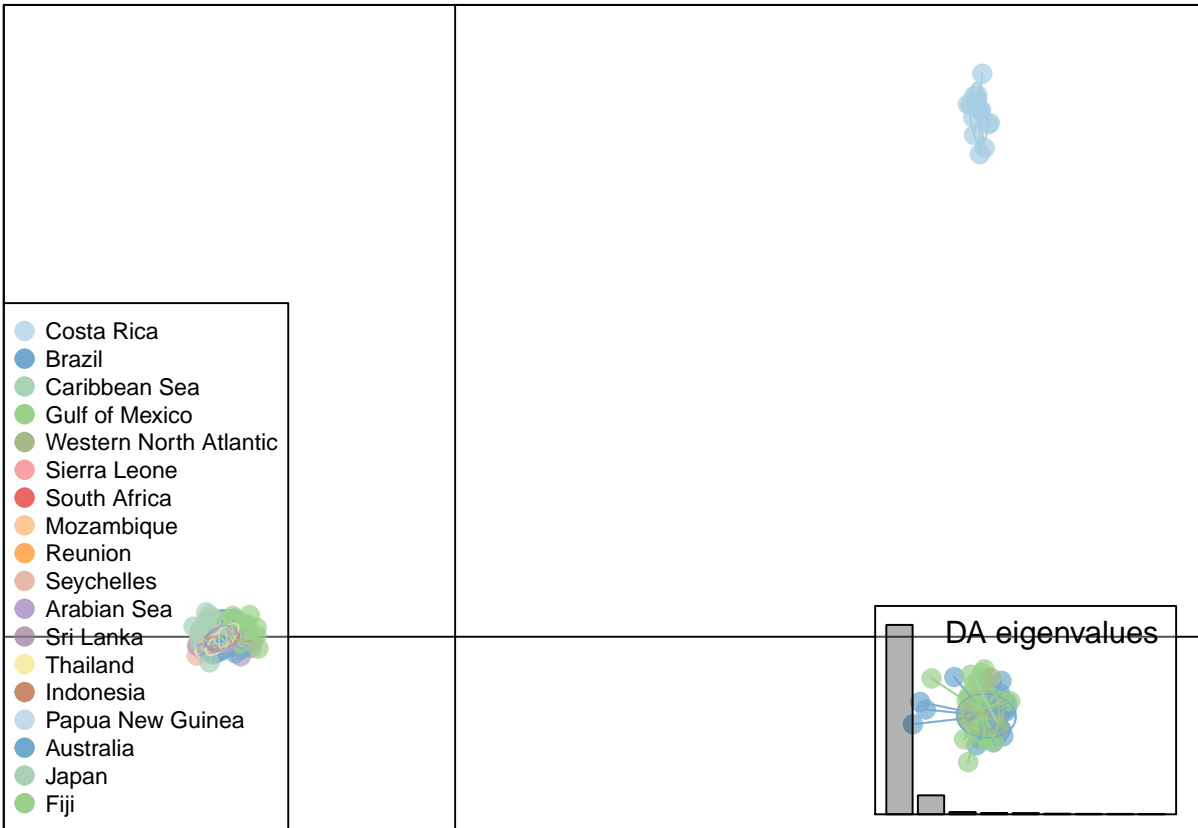

```
for (K in 2:10) {
  colour <- colours.prior[1:K]
  dapc <- get(dapc.all.object.names[K - 1])
  dapc.plot <- ade4::scatter(dapc, cex = 2, legend = TRUE, col = colour,
                             clabel = FALSE, posi.legend = "bottomleft",
```

```

        scree.pca = FALSE,
        posi.pca = "topleft", cleg = 0.75,
        xax = 1, yax = 2, inset.solid = 0.3)
dev.print(
  device = png,
  file = paste0("DArTcap_AUS_subset_DAPC_scatterplot_pergroups_K",
                K, ".png"),
  width = 30,
  height = 15,
  units = "cm",
  res = 300
)
}

```

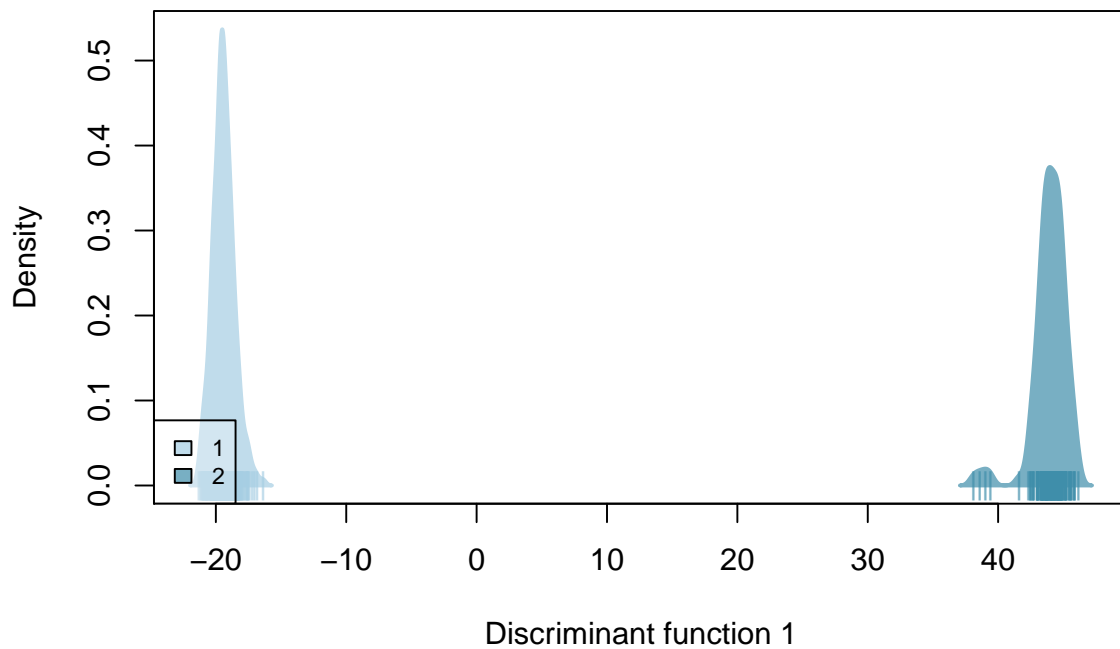

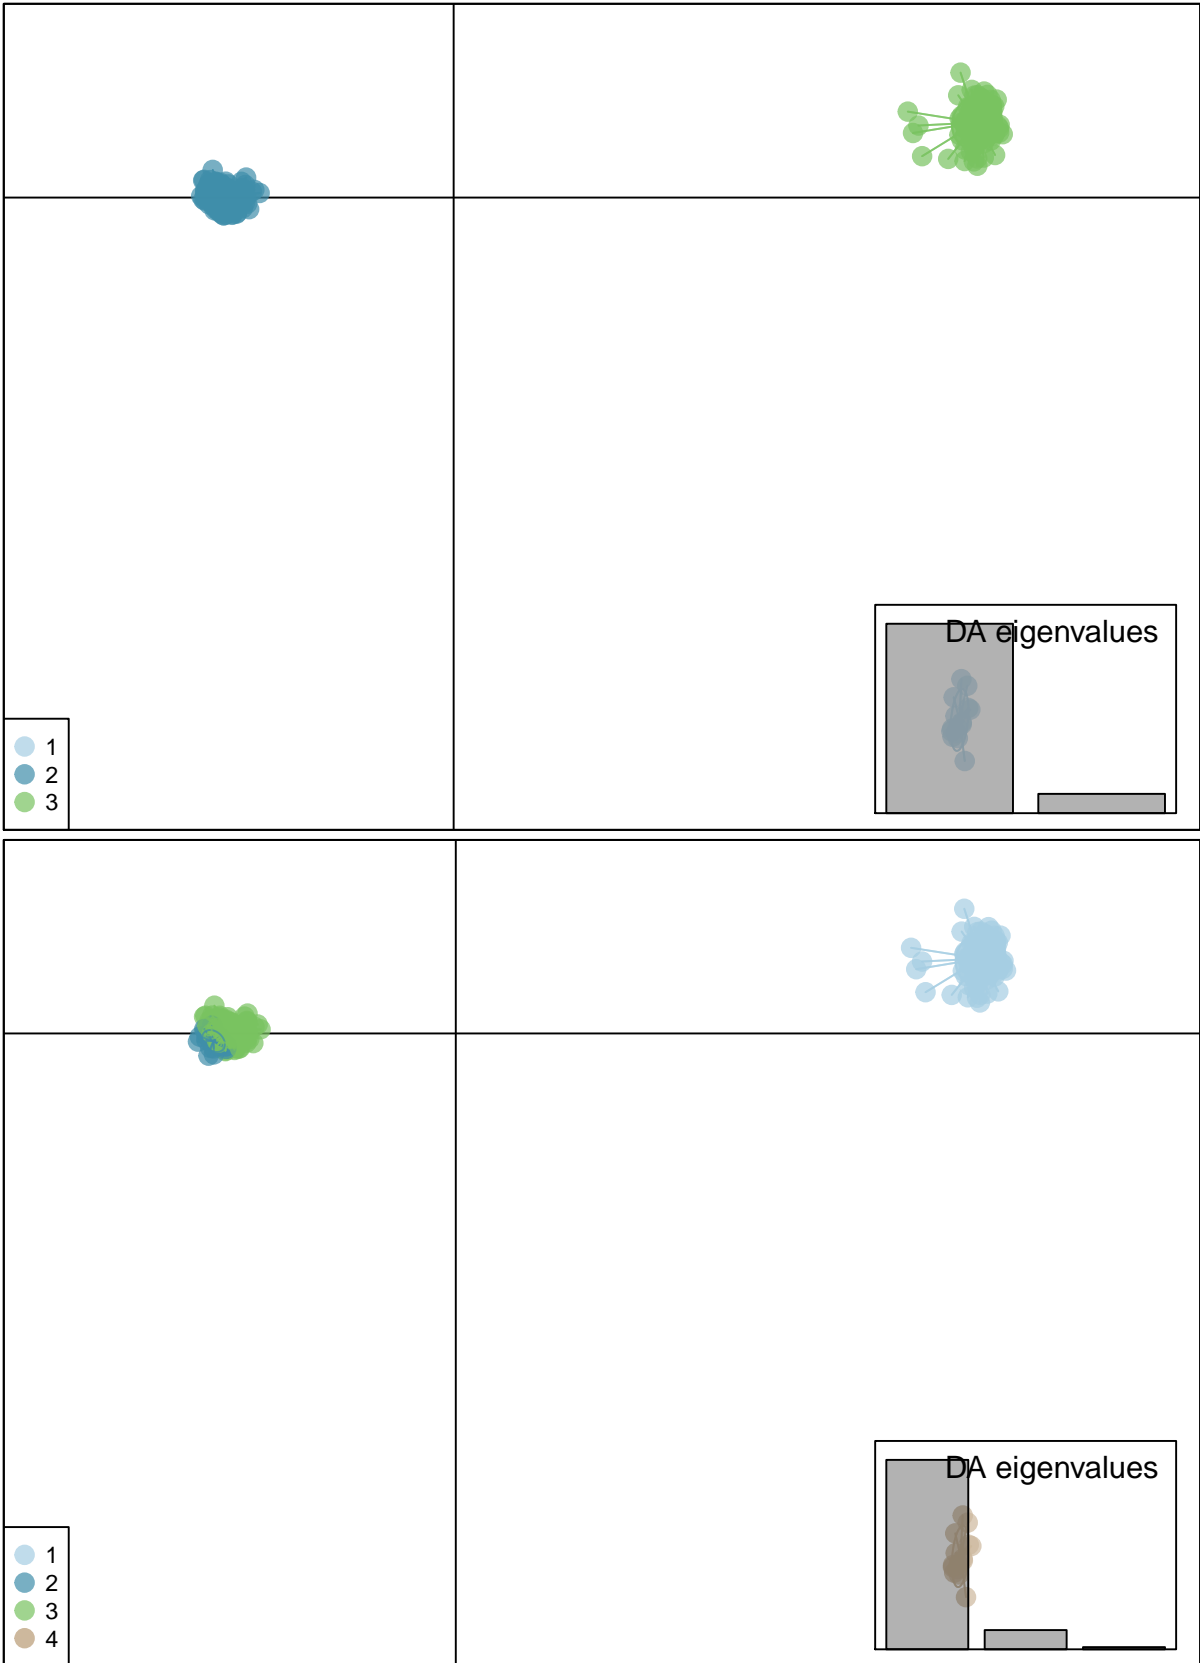



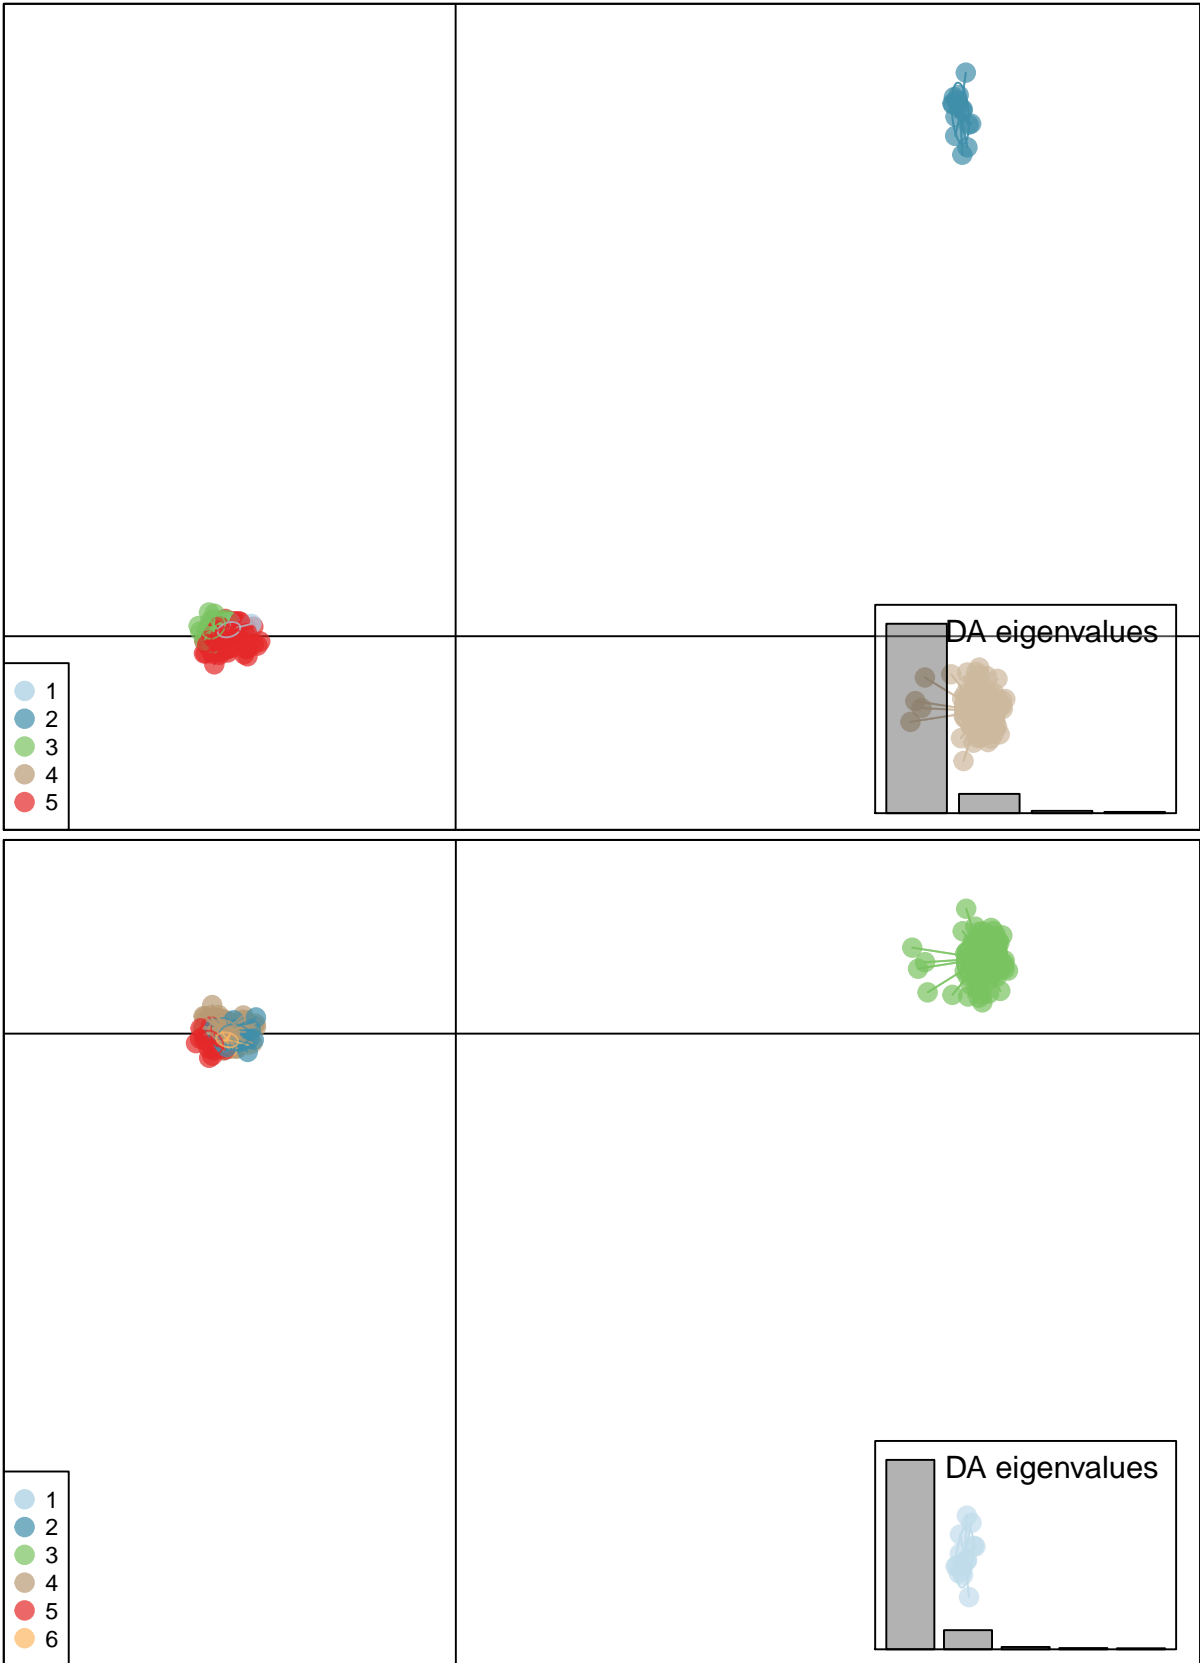

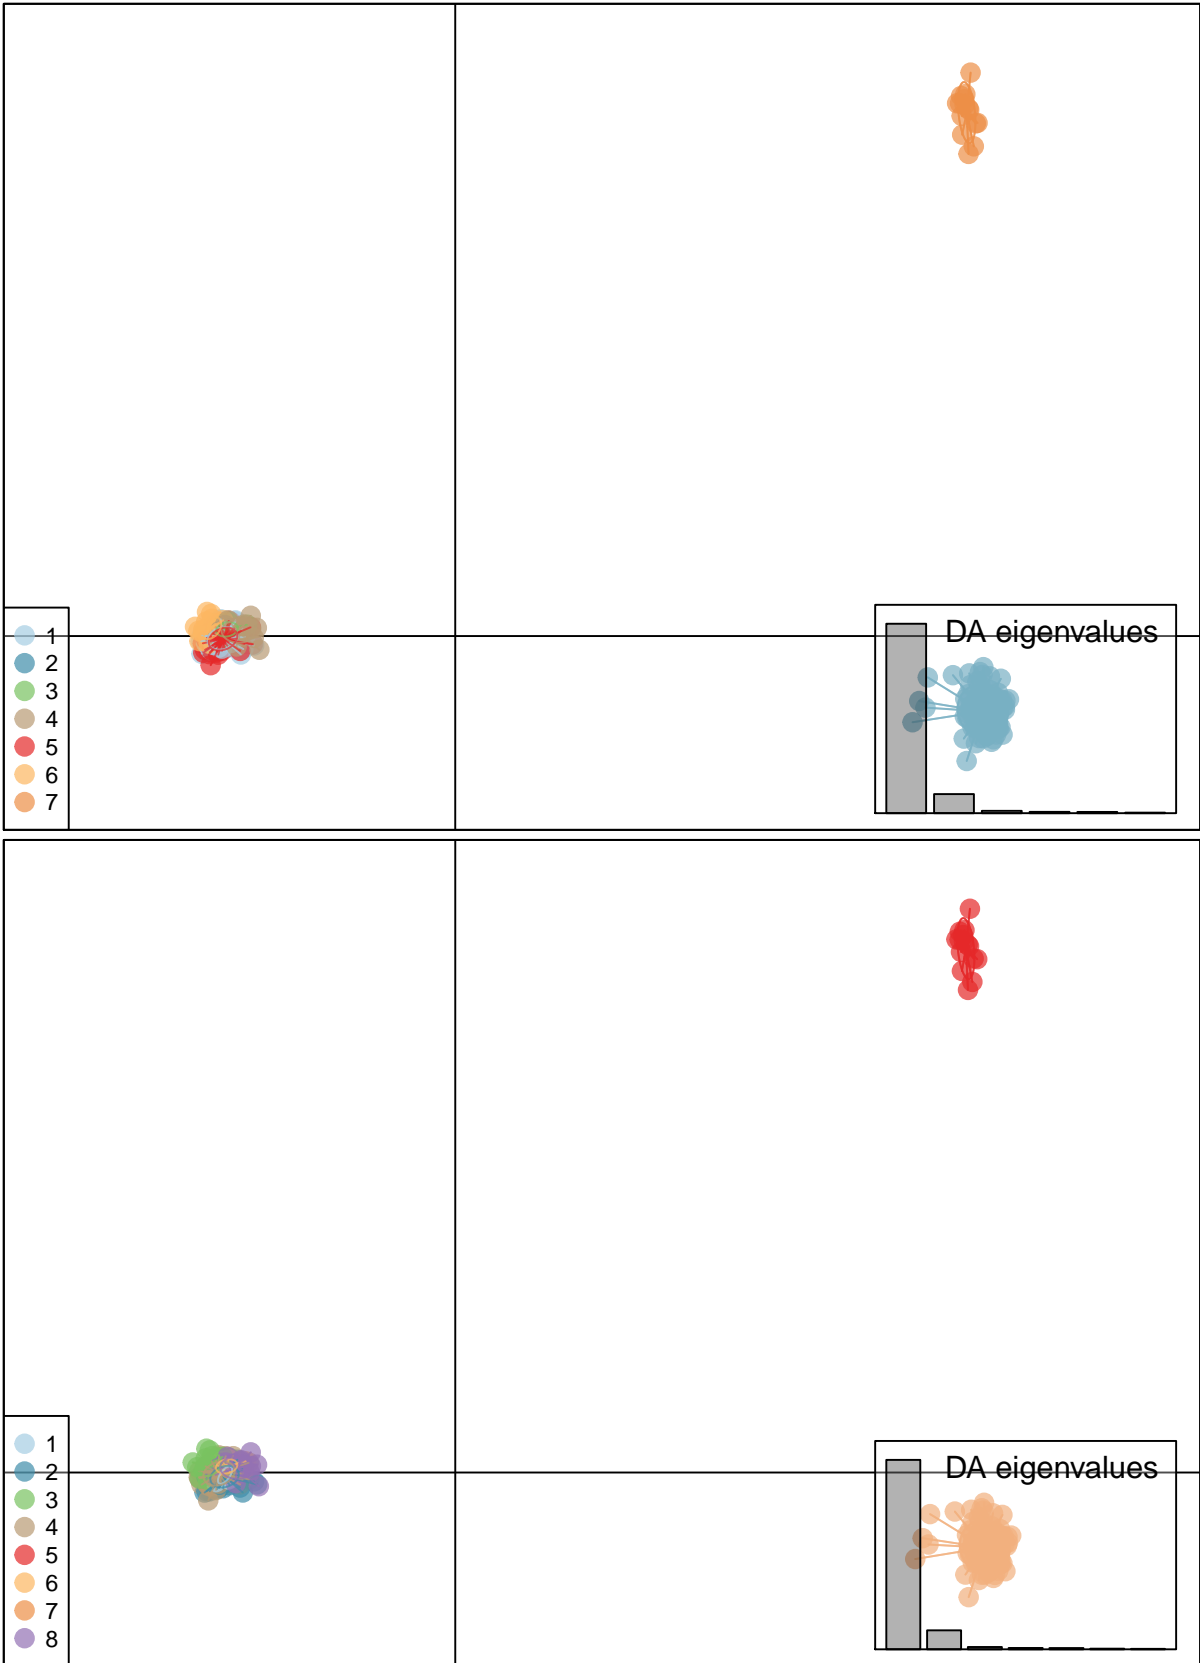

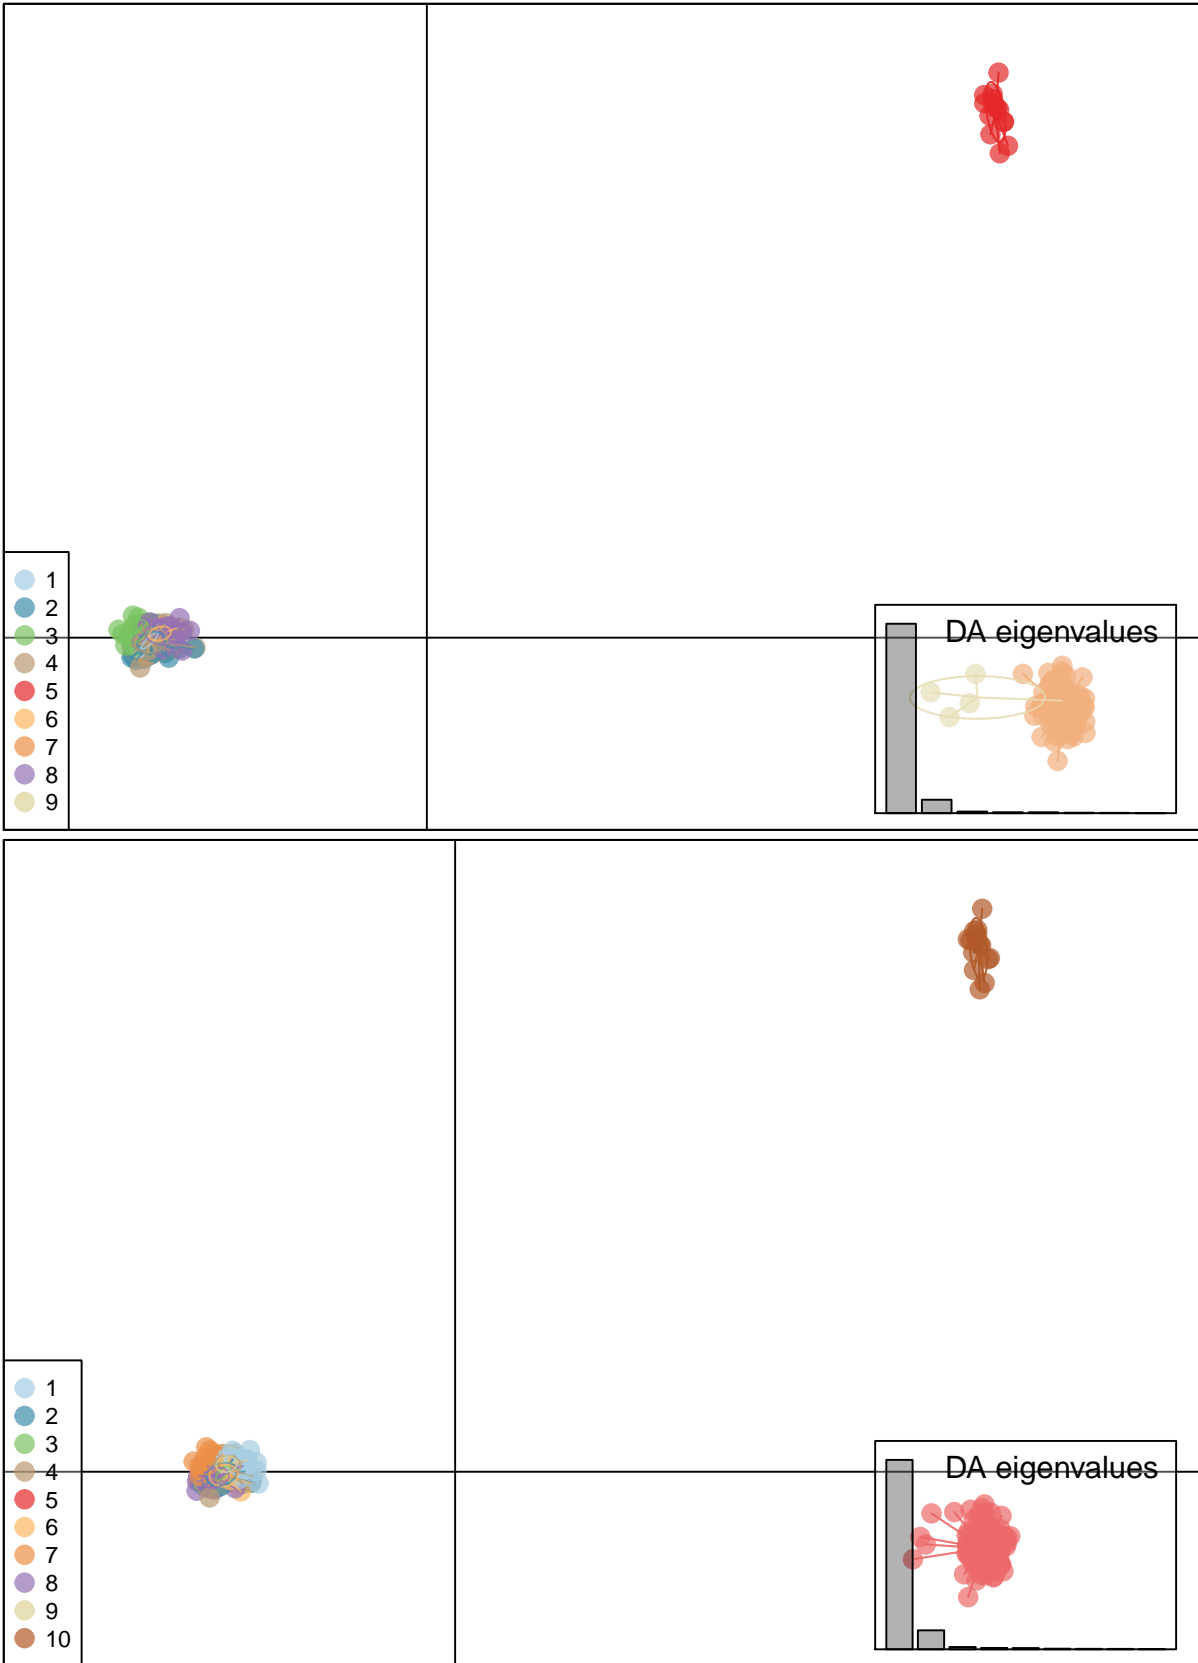

**9.9.5 DAPC scatterplot - FLO**

This code will *colour* individuals according to *sampling location* and **group** individuals according to DAPC **posterior membership**.

```

for (K in 3:10) {
  dapc <- get(dapc.all.object.names[K - 1])
  x <- dapc$ind.coord[,1]
  y <- dapc$ind.coord[,2]
  group <- paste("Group", as.numeric(dapc$assign))
  pop <- BS.dartcap.sub.gl$pop
  df <- data.frame(x, y, group, pop)
  colnames(df) <- c("x", "y", "group", "pop")
  gg <- merge(df, aggregate(cbind(mean.x = x, mean.y = y)~group, df, mean),
              by = "group")

  plot <- ggplot2::ggplot(gg, ggplot2::aes(x,y,color = pop)) +
    ggplot2::geom_point(size = 5) +
    ggplot2::geom_point(ggplot2::aes(x = mean.x, y = mean.y), size = 5,
                        shape = 17, color = "black") +
    ggplot2::geom_segment(ggplot2::aes(x = mean.x, y = mean.y, xend = x,
                                        yend = y)) +
    ggplot2::scale_colour_manual(values = colours.18) +
    ggplot2::scale_fill_manual(values = colours.18) +
    ggplot2::geom_hline(yintercept = 0) +
    ggplot2::geom_vline(xintercept = 0) +
    ggplot2::labs(subtitle = "",
                  y = "PC2",
                  x = "PC1",
                  title = paste0("K=",K," & PC=",PC, sep = ""),
                  caption = "") +
    ggplot2::theme_minimal() +
    ggplot2::theme(
      axis.text = ggplot2::element_text(size = 5),
      axis.title.x = ggplot2::element_text(size = 10),
      axis.title.y = ggplot2::element_text(size = 10),
      legend.text = ggplot2::element_text(size = 7))
  print(plot)
  ggplot2::ggsave(plot,
                  filename = paste0("DArTcap_AUS_subset_DAPC_scatterplot2_K", K, ".png"),
                  width = 30, height = 15, units = "cm")
}

```

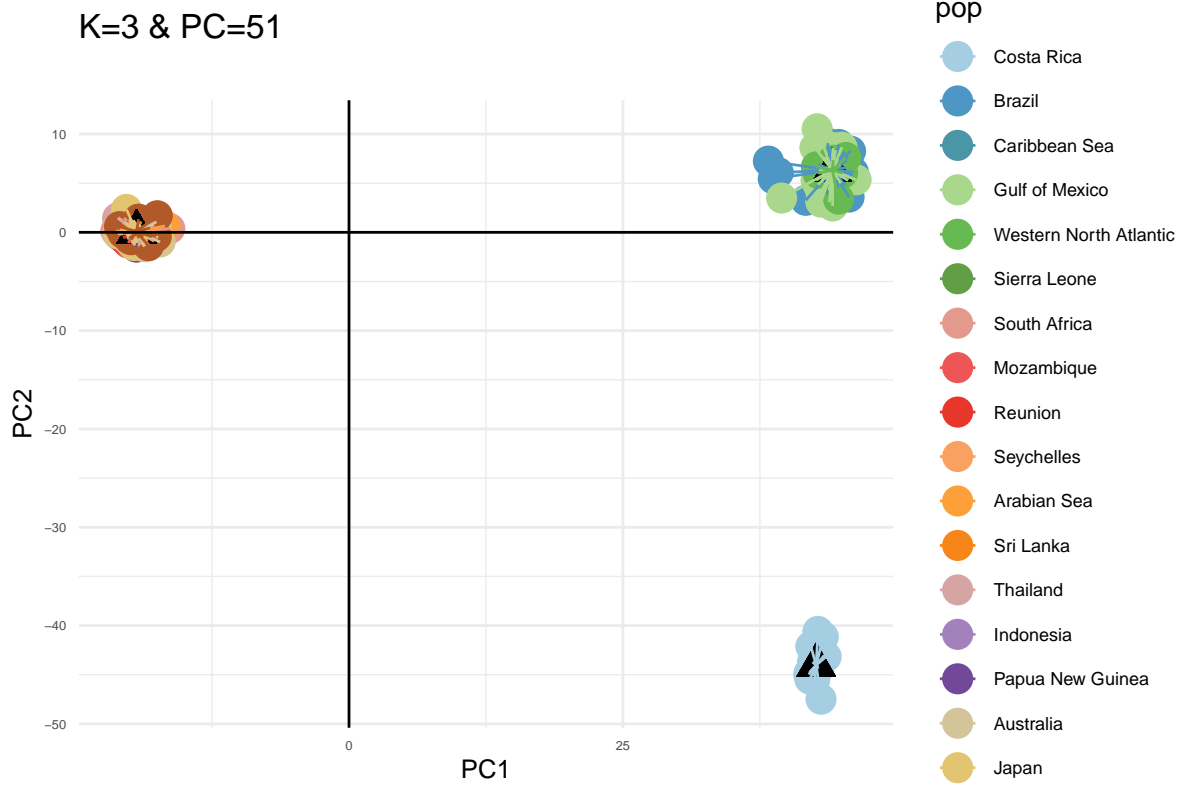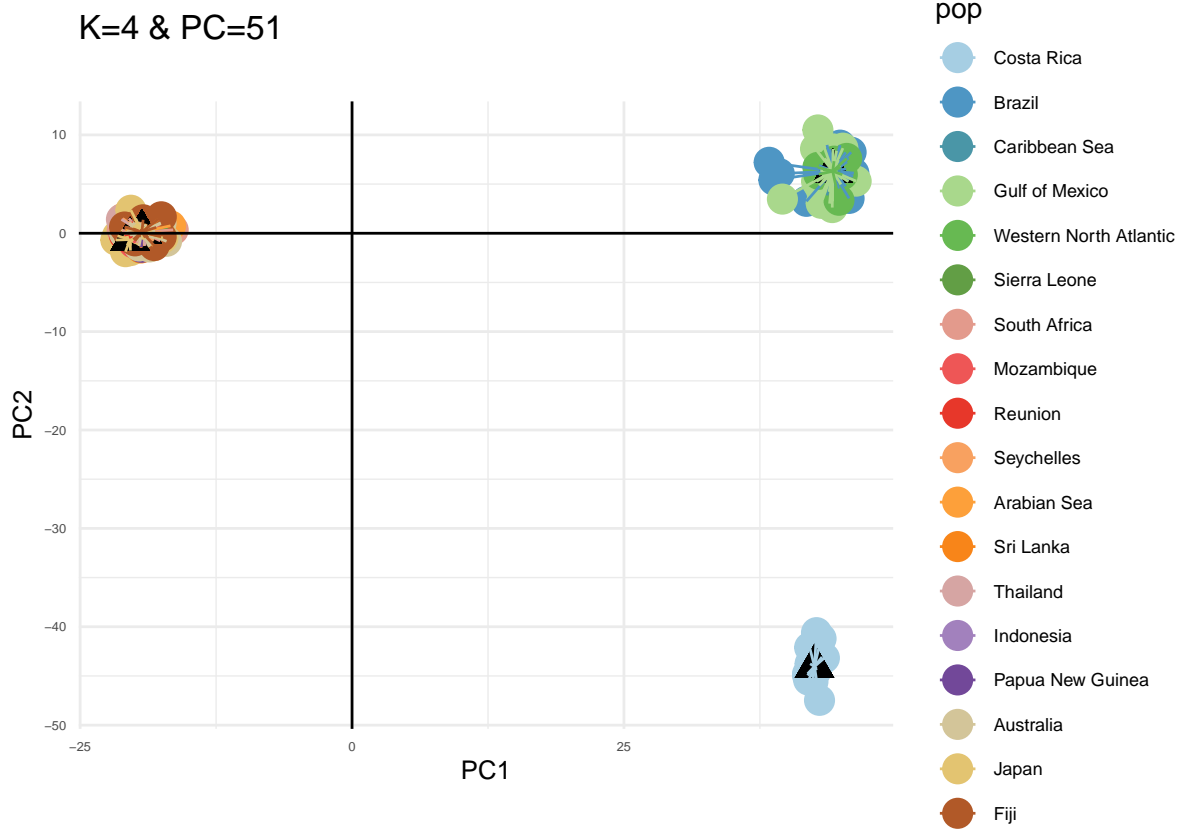

K=5 & PC=51

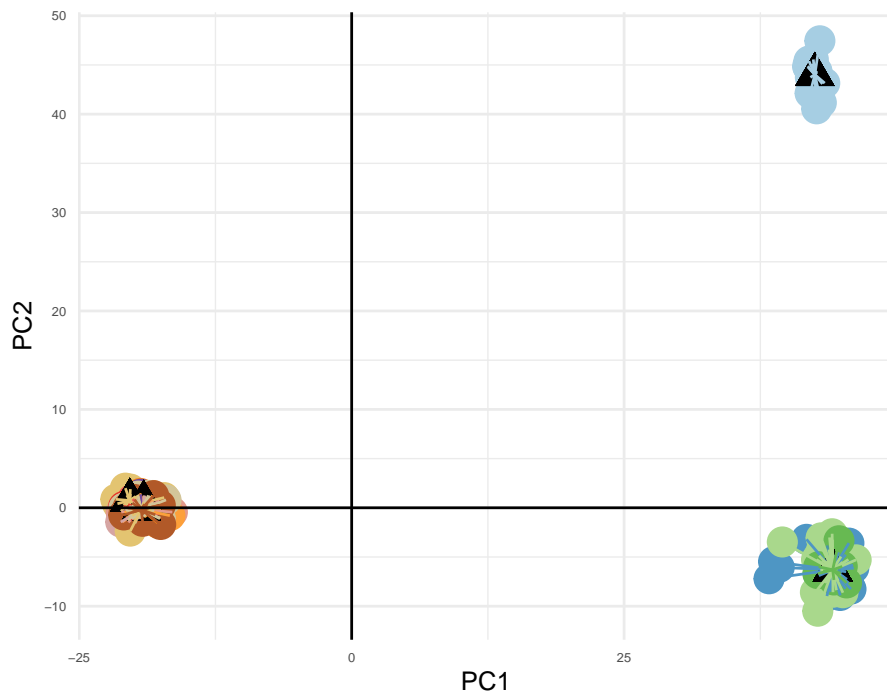

pop

- Costa Rica
- Brazil
- Caribbean Sea
- Gulf of Mexico
- Western North Atlantic
- Sierra Leone
- South Africa
- Mozambique
- Reunion
- Seychelles
- Arabian Sea
- Sri Lanka
- Thailand
- Indonesia
- Papua New Guinea
- Australia
- Japan
- Fiji

K=6 & PC=51

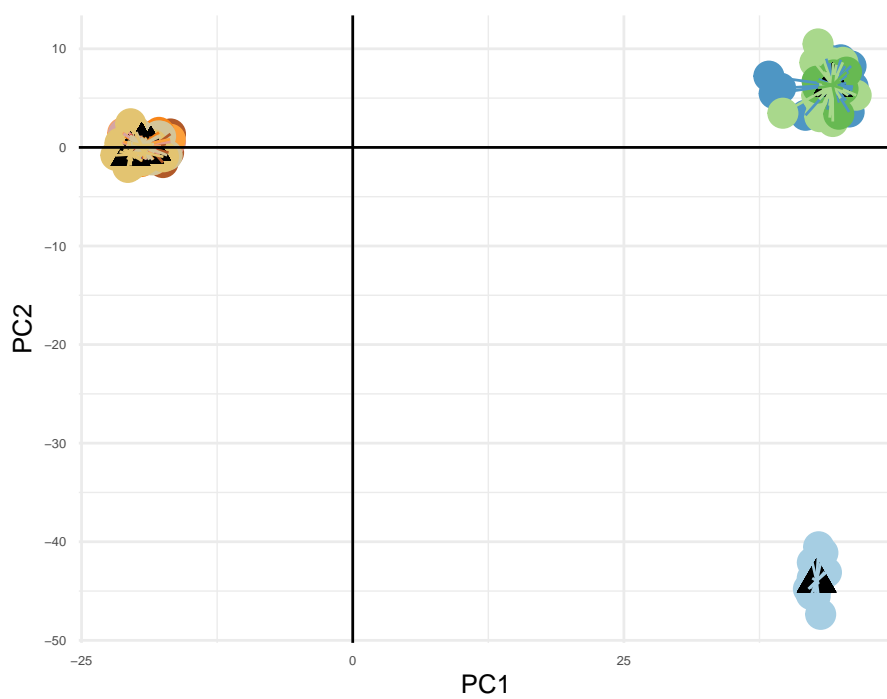

pop

- Costa Rica
- Brazil
- Caribbean Sea
- Gulf of Mexico
- Western North Atlantic
- Sierra Leone
- South Africa
- Mozambique
- Reunion
- Seychelles
- Arabian Sea
- Sri Lanka
- Thailand
- Indonesia
- Papua New Guinea
- Australia
- Japan
- Fiji

K=7 & PC=51

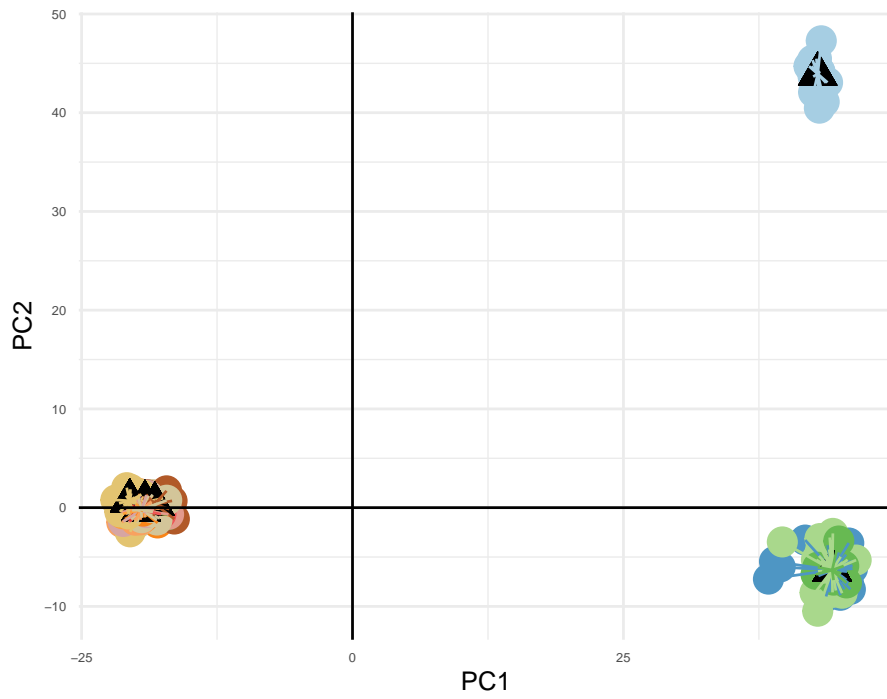

pop

- Costa Rica
- Brazil
- Caribbean Sea
- Gulf of Mexico
- Western North Atlantic
- Sierra Leone
- South Africa
- Mozambique
- Reunion
- Seychelles
- Arabian Sea
- Sri Lanka
- Thailand
- Indonesia
- Papua New Guinea
- Australia
- Japan
- Fiji

K=8 & PC=51

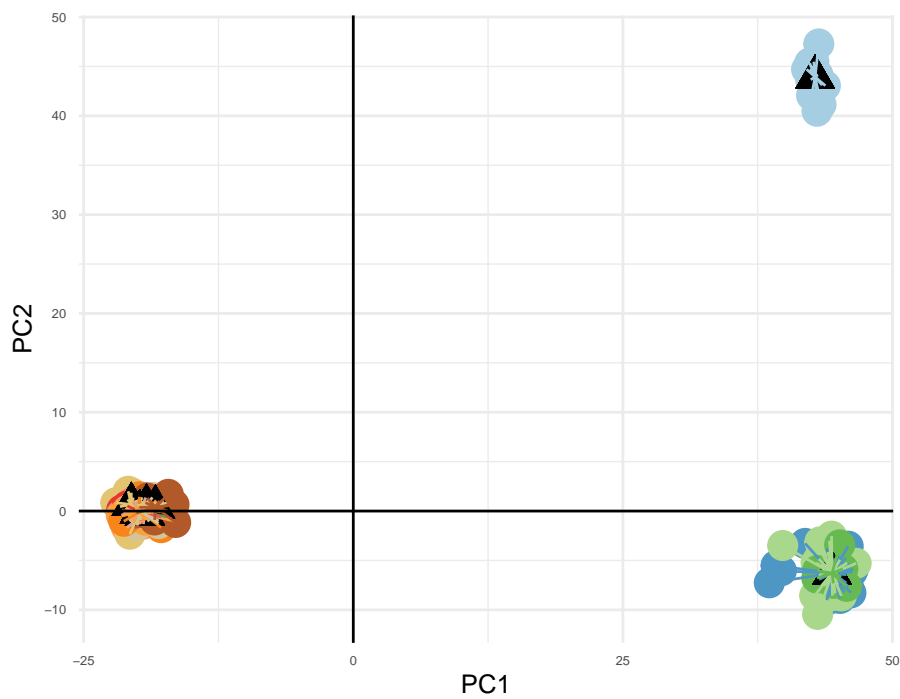

pop

- Costa Rica
- Brazil
- Caribbean Sea
- Gulf of Mexico
- Western North Atlantic
- Sierra Leone
- South Africa
- Mozambique
- Reunion
- Seychelles
- Arabian Sea
- Sri Lanka
- Thailand
- Indonesia
- Papua New Guinea
- Australia
- Japan
- Fiji

K=9 & PC=51

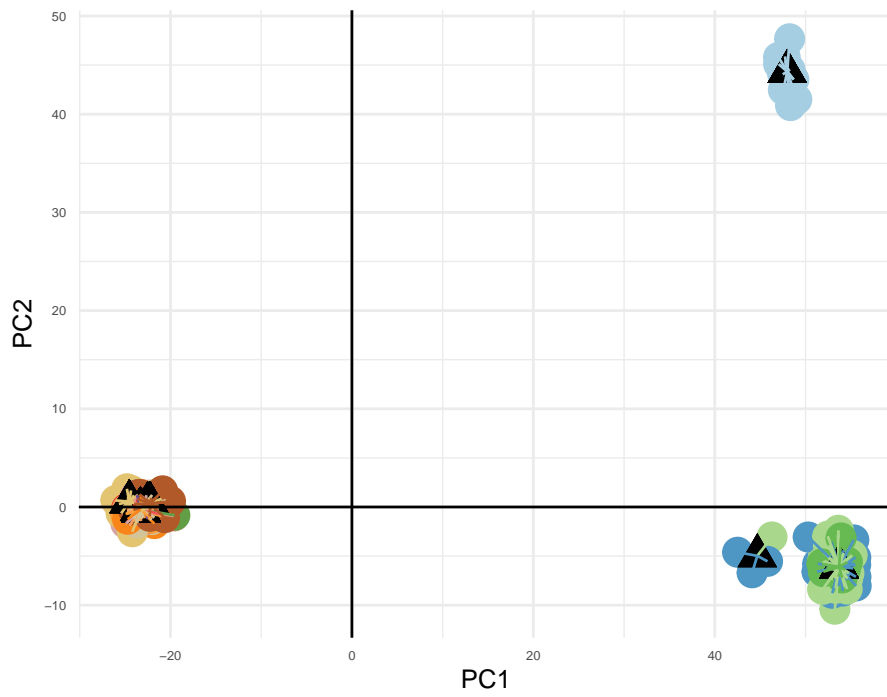

pop

- Costa Rica
- Brazil
- Caribbean Sea
- Gulf of Mexico
- Western North Atlantic
- Sierra Leone
- South Africa
- Mozambique
- Reunion
- Seychelles
- Arabian Sea
- Sri Lanka
- Thailand
- Indonesia
- Papua New Guinea
- Australia
- Japan
- Fiji

K=10 & PC=51

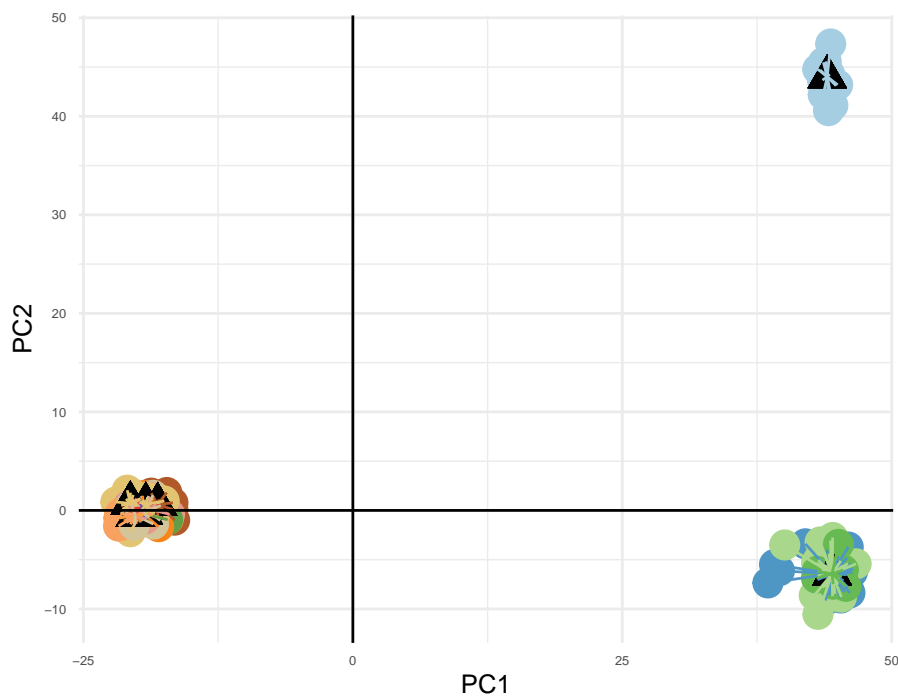

pop

- Costa Rica
- Brazil
- Caribbean Sea
- Gulf of Mexico
- Western North Atlantic
- Sierra Leone
- South Africa
- Mozambique
- Reunion
- Seychelles
- Arabian Sea
- Sri Lanka
- Thailand
- Indonesia
- Papua New Guinea
- Australia
- Japan
- Fiji



## 10 DATA4: DArTcap - West-Atlantic

### 10.1 Set strata

```
strata <- radiator::read_strata("Bull_shark_DArTcap_strata.tsv",
                              keep.two = FALSE)$strata %>%
  dplyr::filter(SpeciesID_genetic == "Carcharhinus leucas") %>%
  dplyr::filter(Region == "W-ATL")
readr::write_tsv(strata, path = "Bull_shark_DArTcap_strata4_WATL.tsv")
```

### 10.2 Filter data

1. Marker Reproducibility: 0.98
2. Individual missingness: 0.35
3. Individual Het - low: 0
4. Individual Het - high: 0.07
5. Individual total coverage - low: 10,000
6. Individual total coverage - high: 1,000,000
7. Marker MAC - low: 3
8. Marker coverage - low: 5
9. Marker coverage - high:65
10. Marker maximum missing proportion: 0.1
11. Marker snp position on locus: n
12. Max 2 SNPs per locus
13. 1 SNP per locus according to mac
14. no LD filter
15. Individual Het - low: 0.141
16. Individual Het - high: 0.200
17. Duplicated individuals: 0.35
18. No filter on HWE

```
dartcap.data <- "SEQ_SNPs_counts_0_Target_merge.csv"
strata <- "Bull_shark_DArTcap_strata4_WATL.tsv"
BSsnp <- radiator::filter_rad(dartcap.data, strata,
                              parallel.core = 1)
BS.dartcap.WATL.gds <- BSsnp$gds
BS.dartcap.WATL.tidy <- BSsnp$output$tidy.data
print(BS.dartcap.WATL.gds, expand = TRUE, all = TRUE, attribute = TRUE,
      attribute.trim = FALSE)
save(BS.dartcap.WATL.tidy, file = "DArTcap_WATL.Rdata")
```

Table 39:

| FILTERS                                    | VALUES      | BEFORE                      | BLACKLIST                 |
|--------------------------------------------|-------------|-----------------------------|---------------------------|
| Filter DArT reproducibility                | 0.98        | 125 / 4 / 1 / 26335 / 37537 | 0 / 0 / 0 / 1043 / 2250   |
| Filter monomorphic markers                 | NA          | 125 / 4 / 1 / 25292 / 35287 | 0 / 0 / 0 / 19147 / 28615 |
| Filter markers in common                   | NA          | 125 / 4 / 1 / 6145 / 6672   | 0 / 0 / 0 / 384 / 506     |
| Filter individuals based on missingness    | 0.35        | 125 / 4 / 1 / 5761 / 6166   | 12 / 0 / 0 / 0 / 0        |
| Filter individuals based on heterozygosity | 0 0.08      | 113 / 4 / 1 / 5761 / 6166   | 0 / 0 / 0 / 0 / 0         |
| Filter individuals based on total coverage | 10000 1e+06 | 113 / 4 / 1 / 5761 / 6166   | 3 / 0 / 0 / 0 / 0         |
| Filter monomorphic markers                 | NA          | 110 / 4 / 1 / 5761 / 6166   | 0 / 0 / 0 / 1074 / 1201   |
| Filter MAC                                 | 3           | 110 / 4 / 1 / 4687 / 4965   | 0 / 0 / 0 / 3182 / 3402   |
| Filter coverage min / max                  | 5-65        | 110 / 4 / 1 / 1505 / 1563   | 0 / 0 / 0 / 486 / 507     |
| Filter genotyping                          | 0.1         | 110 / 4 / 1 / 1019 / 1056   | 0 / 0 / 0 / 74 / 100      |
| Filter SNPs position on the read           | all         | 110 / 4 / 1 / 945 / 956     | 0 / 0 / 0 / 0 / 0         |
| Filter markers snp number                  | 2           | 110 / 4 / 1 / 945 / 956     | 0 / 0 / 0 / 0 / 0         |
| Filter short ld                            | mac         | 110 / 4 / 1 / 945 / 956     | 0 / 0 / 0 / 0 / 11        |
| detect mixed genomes                       | 0.141 0.2   | 110 / 4 / 1 / 945 / 945     | 8 / 0 / 0 / 0 / 0         |
| Filter monomorphic markers                 | NA          | 102 / 4 / 1 / 945 / 945     | 0 / 0 / 0 / 0 / 0         |
| detect duplicate genomes                   | 0.35        | 102 / 4 / 1 / 945 / 945     | 11 / 0 / 0 / 0 / 0        |
| Filter monomorphic markers                 | NA          | 91 / 4 / 1 / 945 / 945      | 0 / 0 / 0 / 3 / 3         |
| Filter HWE                                 | NA          | 91 / 4 / 1 / 942 / 942      | 0 / 0 / 0 / 0 / 0         |

### 10.2.1 Remove extra low and high heterozygous individuals

Because the average heterozygosity per sampling location is not even, certain individuals cannot be excluded without removing 'good' individuals.

```
rm <- c("CL-ARS021-F", "CL-GOM025-F.1", "CL-GOM012-F", "CL-SAF014-M", "CL-SAF002-F",
        "CL-BRZ038-U", "CLF003-F", "CL-GOM011-F", "CL-SAF015-F", "CL-SAF003-M",
        "CL-PNG005-U", "CLCR056-M", "CLCR047.1", "CLCR055-M", "CLCR066-M")

BS.dartcap.WATL.tidy <- BS.dartcap.WATL.tidy[
  !BS.dartcap.WATL.tidy$INDIVIDUALS %in% rm,]
length(unique(BS.dartcap.WATL.tidy$INDIVIDUALS)) # 91
```

## 10.3 Save data

```
Convert <- radiator::genomic_converter(BS.dartcap.WATL.tidy,
                                       output = c("genlight", "stockr",
                                                  "pcadapt", "gtypes", "rubias"))

BS.dartcap.WATL.gl <- Convert$genlight
BS.dartcap.WATL.stkr <- Convert$stockr
BS.dartcap.WATL.pc <- Convert$pcadapt
BS.dartcap.WATL.gt <- Convert$gtypes
BS.dartcap.WATL.rubias <- Convert$rubias

markers.meta <- radiator::extract_markers_metadata(BS.dartcap.WATL.gds,
                                                  whitelist = TRUE)
individuals.meta <- radiator::extract_individuals_metadata(BS.dartcap.WATL.gds,
                                                         whitelist = TRUE)
individuals.meta <- individuals.meta[individuals.meta$INDIVIDUALS %in%
                                     BS.dartcap.WATL.gl$ind.names,]
BS.dartcap.WATL.gl$other$ind.metrics <- individuals.meta
BS.dartcap.WATL.gl$other$loc.metrics <- markers.meta
BS.dartcap.WATL.gt@schemes <- individuals.meta

pop.levels <- c("Brazil", "Caribbean Sea", "Gulf of Mexico", "Western North Atlantic")
BS.dartcap.WATL.gl$pop <- factor(BS.dartcap.WATL.gl$other$ind.metrics$Site2,
                                levels = pop.levels)
BS.dartcap.WATL.gl <- BS.dartcap.WATL.gl[order(BS.dartcap.WATL.gl$pop,
                                               BS.dartcap.WATL.gl$ind.names),]
BS.dartcap.WATL.gl <- BS.dartcap.WATL.gl[order(BS.dartcap.WATL.gl$pop,
                                               BS.dartcap.WATL.gl$ind.names)]
BS.dartcap.WATL.rubias$repunit <- factor(BS.dartcap.WATL.rubias$repunit,
                                         levels = pop.levels)

save(BS.dartcap.WATL.tidy, BS.dartcap.WATL.gl, BS.dartcap.WATL.stkr,
     BS.dartcap.WATL.pc, BS.dartcap.WATL.gt, BS.dartcap.WATL.rubias,
     markers.meta, individuals.meta, file = "DARtcap_WATL.Rdata")
```

## 10.4 Load data

```
load("DARtcap_WATL.Rdata")
pop.levels <- c("Brazil", "Caribbean Sea", "Gulf of Mexico", "Western North Atlantic")

BS.dartcap.WATL.gl$pop <- factor(BS.dartcap.WATL.gl$other$ind.metrics$Site,
                                levels = pop.levels)
```

```

BS.dartcap.WATL.gl <- BS.dartcap.WATL.gl[order(BS.dartcap.WATL.gl$pop,
                                             BS.dartcap.WATL.gl$ind.names)]

pop.levels1 <- stringr::str_replace_all(pop.levels, " ", "_")
BS.dartcap.WATL.tidy$POP_ID <- factor(BS.dartcap.WATL.tidy$POP_ID,
                                     levels = pop.levels1)
BS.dartcap.WATL.tidy <- BS.dartcap.WATL.tidy[order(BS.dartcap.WATL.tidy$POP_ID,
                                                  BS.dartcap.WATL.tidy$INDIVIDUALS),]

adegenet::nInd(BS.dartcap.WATL.gl) # 91
adegenet::nLoc(BS.dartcap.WATL.gl) # 942
summary(BS.dartcap.WATL.gl$pop)
sum(duplicated(BS.dartcap.WATL.gl$other$ind.metrics$`Genetic code`)) # 0 replicate left
sum(baits$CloneID %in% BS.dartcap.WATL.gl$other$loc.metrics$LOCUS) #24

## [1] 91
## [1] 942
##           Brazil           Caribbean Sea           Gulf of Mexico
##           47                2                34
## Western North Atlantic
##           8
## [1] 0
## [1] 24

```

## 10.5 Remove sex-linked markers

```

load("Sex-linked_marker_DArTcap.Rdata")
load("Sex_results.Rdata")
sum(bull_shark$sexy.summary$CLONE_ID %in% SLM$sexy.summary$CLONE_ID) #33
sum(SLM$sexy.summary$CLONE_ID %in% bull_shark$sexy.summary$CLONE_ID) #23
sex.markers <- unique(c(bull_shark$sexy.summary$CLONE_ID, SLM$sexy.summary$CLONE_ID))

sum(BS.dartcap.WATL.gl$loc.names %in% sex.markers) #11
locnames <- BS.dartcap.WATL.gl$loc.names
BS.dartcap.WATL.gl <- BS.dartcap.WATL.gl[,!locnames %in% sex.markers]
BS.dartcap.WATL.gl$other$loc.metrics <- BS.dartcap.WATL.gl$other$loc.metrics[
  !locnames %in% sex.markers,]

sum(sex.markers %in% unique(BS.dartcap.WATL.tidy$LOCUS)) # 11
BS.dartcap.WATL.tidy <- BS.dartcap.WATL.tidy[!BS.dartcap.WATL.tidy$LOCUS %in%
  sex.markers,]

locus.gt <- stringr::str_match(pattern = "__\\s*(.*?)\\s*__",
                              string = BS.dartcap.WATL.gt@data$locus)[,2]
BS.dartcap.WATL.gt <- BS.dartcap.WATL.gt[,!locus.gt %in% sex.markers, ,
  drop = TRUE]

locus.rubias <- stringr::str_match(pattern = "__\\s*(.*?)\\s*__",
                                   string = colnames(BS.dartcap.WATL.rubias))[,2]
BS.dartcap.WATL.rubias <- BS.dartcap.WATL.rubias[,!locus.rubias %in% sex.markers]

## [1] 33
## [1] 23
## [1] 11
## [1] 11

```

## 10.6 Genetic diversity

```
set.seed(124)
pop.levels <- c("Brazil","Caribbean Sea","Gulf of Mexico", "Western North Atlantic")

gl <- BS.dartcap.WATL.gl
gl$pop <- factor(gl$other$ind.metrics$Site, levels = pop.levels)
gl <- gl[order(gl$pop,gl$ind.names)]

gl2gpop(gl, filename = "BS_dartcap_WATL_genepop.txt")
bastat <- diveRsity::basicStats(infile = "BS_dartcap_WATL_genepop.txt",
                                outfile = "BS_dartcap_WATL_BasicStat_output.txt",
                                fis_ci = TRUE,ar_ci = TRUE, fis_boots = 1000,
                                ar_boots = 1000,mc_reps = 1000,
                                rarefaction = FALSE, ar_alpha = 0.05,
                                fis_alpha = 0.05)

length(bastat$main_tab)#4
gendiv <- data.frame(
  "Brazil" = bastat$main_tab[[1]]$overall,
  "Caribbean Sea" = bastat$main_tab[[2]]$overall,
  "Gulf of Mexico" = bastat$main_tab[[3]]$overall,
  "Western North Atlantic" = bastat$main_tab[[4]]$overall,
  check.names = FALSE)
row.names(gendiv) <- rownames(bastat$main_tab[[1]])

df <- as.data.frame(gl)
df[df == "0"] <- "11"
df[df == "1"] <- "12"
df[df == "2"] <- "22"
gen.gi <- adegenet::df2genind(df, ploidy = 2,ncode = 2, pop = gl$pop)
ris_basic <- hierfstat::basic.stats(gen.gi)
fis.hierfstat <- apply(ris_basic$Fis, 2, mean, na.rm=T)
fis.CI <- hierfstat::boot.ppfis(gen.gi, nboot = 1000, quant = c(0.025,0.975),
                                diploid = TRUE,dig = 4)
df <- data.frame(fis.hierfstat,fis.CI.low = fis.CI$fis.ci[,1],
                 fis.CI.high = fis.CI$fis.ci[,2])
df <- as.data.frame(t(df))
gendiv <- rbind(gendiv, df)

readr::write_tsv(gendiv, path = "DARtcap_WATL_gendiv.txt")
save(gendiv, file = "DARtcap_WATL_gendiv.Rdata")

load("DARtcap_WATL_gendiv.Rdata")
shortnames <- c("BRZ", "CAR", "GOM", "WNA")
knitr::kable(gendiv, col.names = shortnames, digits = 4,caption = "") %>%
  kableExtra::kable_styling(full_width = FALSE,font_size = 5,
                             latex_options = c("hold_position"))
```

### 10.6.1 Number of monomorphic markers per population

```
pop.levels <- c("Brazil","Caribbean Sea","Gulf of Mexico", "Western North Atlantic")

monomorphics <- c()
for (i in 1:length(pop.levels)) {
  x <- BS.dartcap.WATL.gl[BS.dartcap.WATL.gl$pop == pop.levels[i]]
  x2 <- dartR::gl.filter.monomorphs(x, verbose = 0)
```

Table 40:

|               | BRZ     | CAR     | GOM     | WNA     |
|---------------|---------|---------|---------|---------|
| ar            | 1.3270  | 1.2470  | 1.3070  | 1.2960  |
| size          | 46.7390 | 1.9940  | 33.7090 | 7.9720  |
| obs_het       | 0.1770  | 0.1780  | 0.1680  | 0.1700  |
| exp_het       | 0.1820  | 0.1340  | 0.1720  | 0.1640  |
| uexp_het      | 0.1840  | 0.1790  | 0.1750  | 0.1750  |
| fis           | 0.0300  | -0.3290 | 0.0290  | -0.0390 |
| hwe_glb       | 1.0000  | 1.0000  | 1.0000  | 1.0000  |
| hwe_hom       | 1.0000  | 1.0000  | 1.0000  | 1.0000  |
| hwe_het       | 1.0000  | 1.0000  | 1.0000  | 1.0000  |
| fis_lo        | 0.0080  | -1.0000 | 0.0000  | -0.1530 |
| fis_hi        | 0.0300  | -0.3290 | 0.0300  | -0.0490 |
| ar_lo         | 1.3010  | 1.1680  | 1.1880  | 1.1570  |
| ar_hi         | 1.3500  | 1.3230  | 1.3320  | 1.3400  |
| fis.hierfstat | 0.0401  | -0.0997 | 0.0430  | 0.0214  |
| fis.CI.low    | 0.0192  | -0.0784 | 0.0208  | -0.0031 |
| fis.CI.high   | 0.0538  | 0.0811  | 0.0658  | 0.0719  |

```

locs <- adegenet::nLoc(x) - adegenet::nLoc(x2)
monomorphics[i] <- locs
}
names(monomorphics) <- pop.levels
shortnames <- c("BRZ", "CAR", "GOM", "WNA")
knitr::kable(t(as.table(monomorphics)), col.names = shortnames, digits = 4,
             caption = "") %>%
  kableExtra::kable_styling(full_width = FALSE, font_size = 5,
                            latex_options = c("hold_position"))

```

Table 41:

| BRZ | CAR | GOM | WNA |
|-----|-----|-----|-----|
| 36  | 682 | 144 | 385 |

## 10.6.2 Nucleotide diversity and inbreeding

```

pi.sum <- radiator::pi(
  data = BS.dartcap.WATL.tidy,
  read.length = 70,
  parallel.core = parallel::detectCores() - 1,
  path.folder = NULL,
  verbose = TRUE
)

FIS.sum <- radiator::ibdgh_fh(data = BS.dartcap.WATL.tidy,
                             path.folder = NULL, verbose = TRUE)

save(pi.sum, FIS.sum, file = "DARtcap_WATL_pi_FIS_Sites.Rdata")

load("DARtcap_WATL_pi_FIS_Sites.Rdata")
pi.sum$boxplot.pi

```

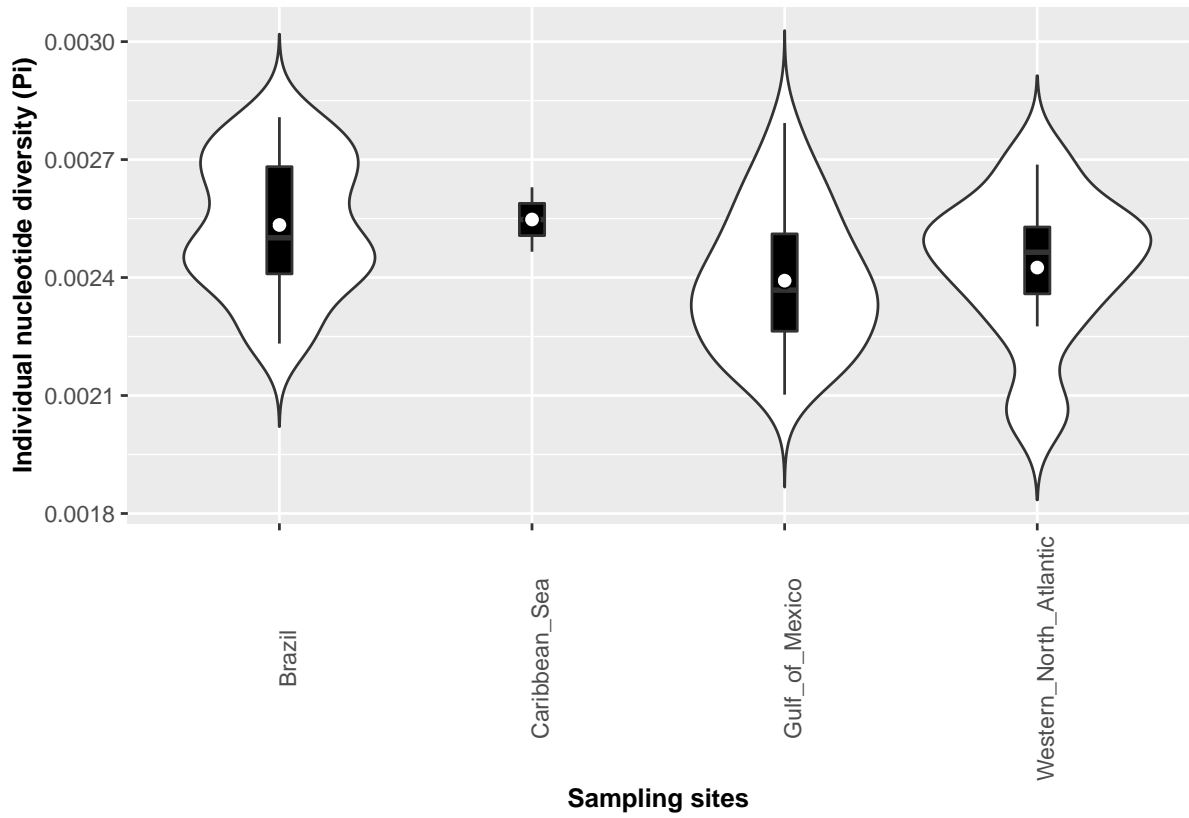

FIS.sum\$fh.box.plot

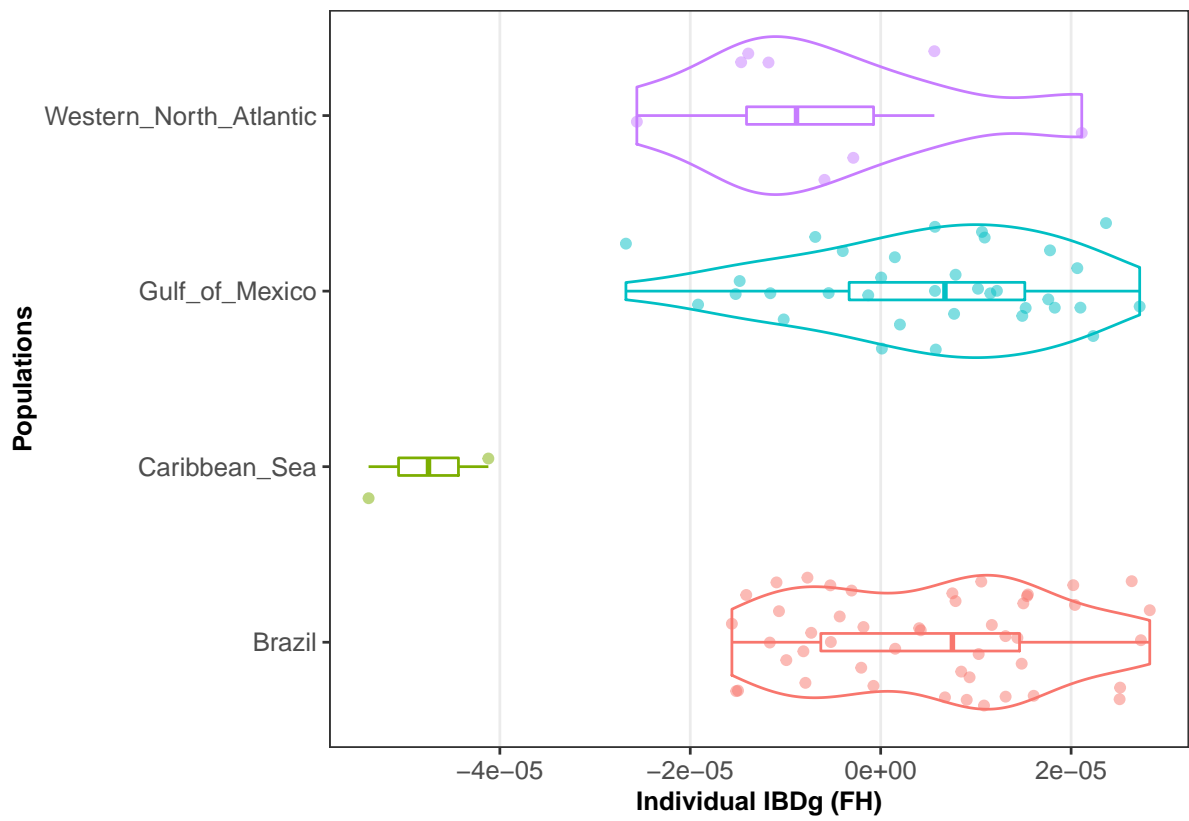

## 10.7 Genetic differentiation

```
Fst.gt <-
  strataG::popStructTest(
    BS.dartcap.WATL.gt,
    nrep = 1000,
    stats = "all",
    type = "pairwise",
    keep.null = FALSE,
    quietly = TRUE,
    nb.cores = parallel::detectCores() - 1,
    write.output = FALSE
  )
save(Fst.gt, file = "DARtcap_WATL_FST.Rdata")
readr::write_tsv(Fst.gt$pairwise$result, path = "DARtcap_WATL_FST.txt")

load("DARtcap_WATL_FST.Rdata")
knitr::kable(
  Fst.gt$pairwise$result[order(Fst.gt$pairwise$result$Fst,
                               decreasing = TRUE),
                        -c(1:4)], digits = 4,
  caption = "Pairwise Fst for 931 loci between the West Atlantic sites" %>%
  kableExtra::kable_styling(full_width = FALSE, font_size = 5,
                             latex_options = c("hold_position")) %>%
  kableExtra::landscape()
```

Table 42: Pairwise Fst for 931 loci between the West Atlantic sites

|                                                   | Chi2      | Chi2.p.val | D      | D.p.val | Fis     | Fis.p.val | Fst     | Fst.p.val | F'st    | F'st.p.val | Gst    | Gst.p.val | G'st   | G'st.p.val | G'st   | G'st.p.val |
|---------------------------------------------------|-----------|------------|--------|---------|---------|-----------|---------|-----------|---------|------------|--------|-----------|--------|------------|--------|------------|
| Brazil (47) v. Western_North_Atlantic (8)         | 976.2829  | 0.3686     | 0.0005 | 0.2098  | -0.1240 | 0.8032    | 0.0067  | 0.0160    | 0.0082  | 0.0160     | 0.0069 | 0.0120    | 0.0099 | 0.0120     | 0.0167 | 0.0120     |
| Brazil (47) v. Gulf_of_Mexico (34)                | 1267.0889 | 0.0010     | 0.0002 | 0.0220  | 0.0271  | 0.9920    | 0.0061  | 0.0010    | 0.0075  | 0.0010     | 0.0032 | 0.0010    | 0.0046 | 0.0010     | 0.0079 | 0.0010     |
| Gulf_of_Mexico (34) v. Western_North_Atlantic (8) | 948.0094  | 0.0739     | 0.0004 | 0.2627  | -0.6087 | 0.7113    | 0.0027  | 0.1479    | 0.0033  | 0.1479     | 0.0144 | 0.1558    | 0.0203 | 0.1518     | 0.0341 | 0.1538     |
| Brazil (47) v. Caribbean_Sea (2)                  | 997.6150  | 0.3347     | 0.0016 | 0.6563  | -0.1850 | 0.6014    | 0.0012  | 0.4338    | 0.0015  | 0.4338     | 0.0177 | 0.4113    | 0.0253 | 0.4113     | 0.0423 | 0.4113     |
| Caribbean_Sea (2) v. Gulf_of_Mexico (34)          | 982.2654  | 0.0599     | 0.0014 | 0.7093  | -1.0572 | 0.3402    | -0.0008 | 0.5051    | -0.0010 | 0.5051     | 0.0777 | 0.6655    | 0.1054 | 0.6199     | 0.1698 | 0.6324     |
| Caribbean_Sea (2) v. Western_North_Atlantic (8)   | 657.8576  | 0.4326     | 0.0015 | 0.4366  | -4.6634 | 0.3099    | -0.0023 | 0.5425    | -0.0028 | 0.5425     | 0.3066 | 0.6501    | 0.3701 | 0.6706     | 0.5180 | 0.6706     |



## 10.8 PCA

```
pca1 <- adegenet::glPca(BS.dartcap.WATL.gl, nf = 5, parallel = TRUE,  
                        n.cores = parallel::detectCores() - 1)  
save(pca1, file = "DARtcap_WATL_PCA.Rdata")
```

```
load("DARtcap_WATL_PCA.Rdata")
```

```
BS.pca.scores <- as.data.frame(pca1$scores)  
BS.pca.scores$pop <- pop(BS.dartcap.WATL.gl)  
cols <- adegenet::funky(nPop(BS.dartcap.WATL.gl))
```

```
p <-  
ggplot2::ggplot(BS.pca.scores, ggplot2::aes(x = PC1, y = PC2, colour = pop)) +  
ggplot2::geom_point(size = 2) + ggplot2::scale_color_manual(values = cols) +  
ggplot2::geom_hline(yintercept = 0) + ggplot2::geom_vline(xintercept = 0) +  
ggplot2::theme_minimal() +  
ggplot2::theme(  
  axis.text = ggplot2::element_text(size = 5),  
  axis.title.x = ggplot2::element_text(size = 10),  
  axis.title.y = ggplot2::element_text(size = 10),  
  legend.text = ggplot2::element_text(size = 7)  
)  
p
```

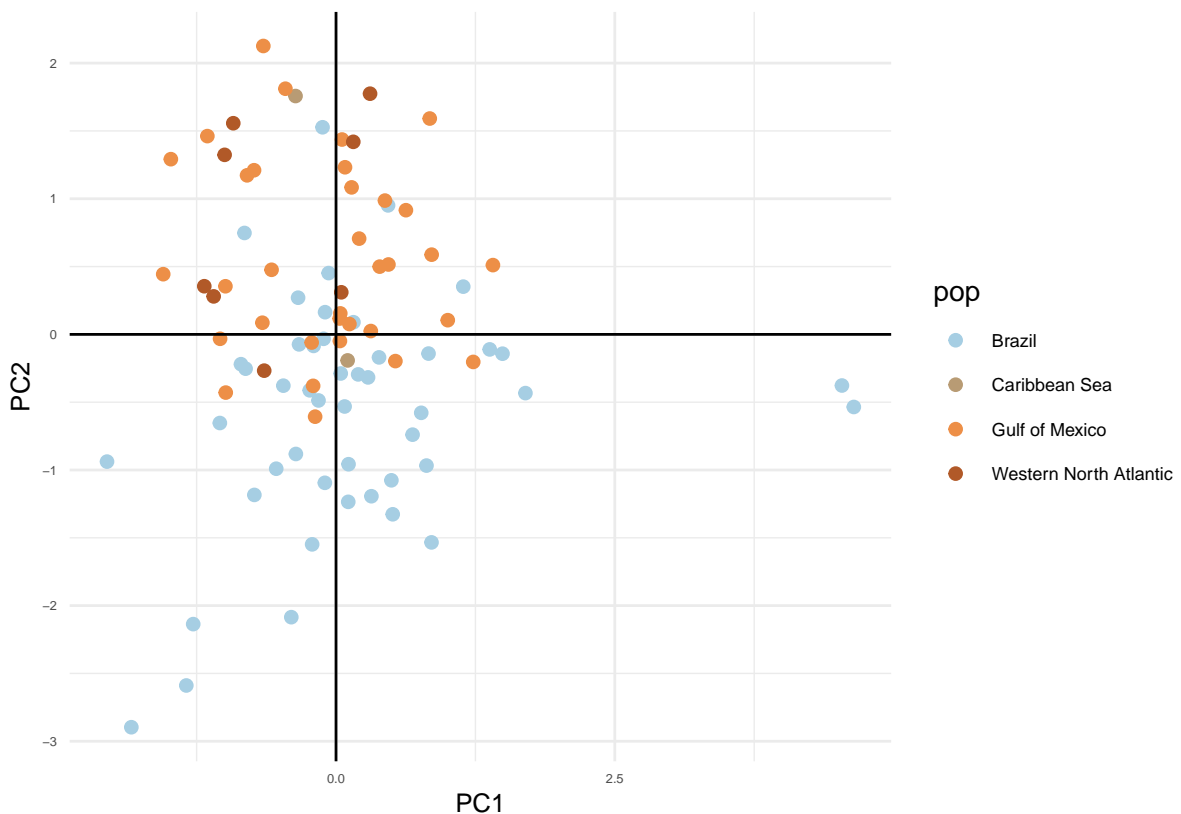

```
ggplot2::ggsave(p, filename = "DARtcap_WATL_PCA1.png", width = 30,  
                height = 15, units = "cm")
```

```
p <-  
ggplot2::ggplot(BS.pca.scores, ggplot2::aes(x = PC1, y = PC3, colour = pop)) +
```

```

ggplot2::geom_point(size = 2) + ggplot2::scale_color_manual(values = cols) +
ggplot2::geom_hline(yintercept = 0) + ggplot2::geom_vline(xintercept = 0) +
ggplot2::theme_minimal() +
ggplot2::theme(
  axis.text = ggplot2::element_text(size = 5),
  axis.title.x = ggplot2::element_text(size = 10),
  axis.title.y = ggplot2::element_text(size = 10),
  legend.text = ggplot2::element_text(size = 7)
)

```

p

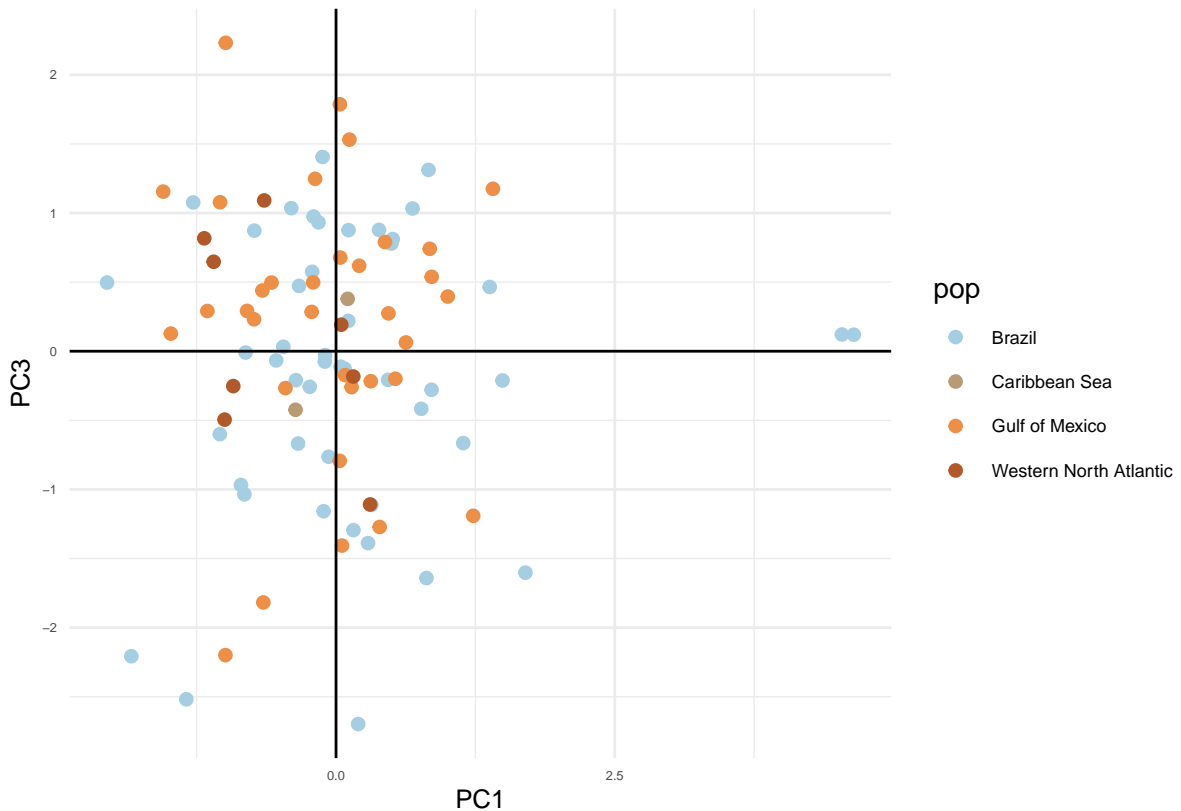

```

ggplot2::ggsave(p, filename = "DArTcap_WATL_PCA2.png", width = 30,
  height = 15, units = "cm")

```

```

p <-
ggplot2::ggplot(BS.pca.scores, ggplot2::aes(x = PC2, y = PC3, colour = pop)) +
ggplot2::geom_point(size = 2) + ggplot2::scale_color_manual(values = cols) +
ggplot2::geom_hline(yintercept = 0) + ggplot2::geom_vline(xintercept = 0) +
ggplot2::theme_minimal() +
ggplot2::theme(
  axis.text = ggplot2::element_text(size = 5),
  axis.title.x = ggplot2::element_text(size = 10),
  axis.title.y = ggplot2::element_text(size = 10),
  legend.text = ggplot2::element_text(size = 7)
)

```

p

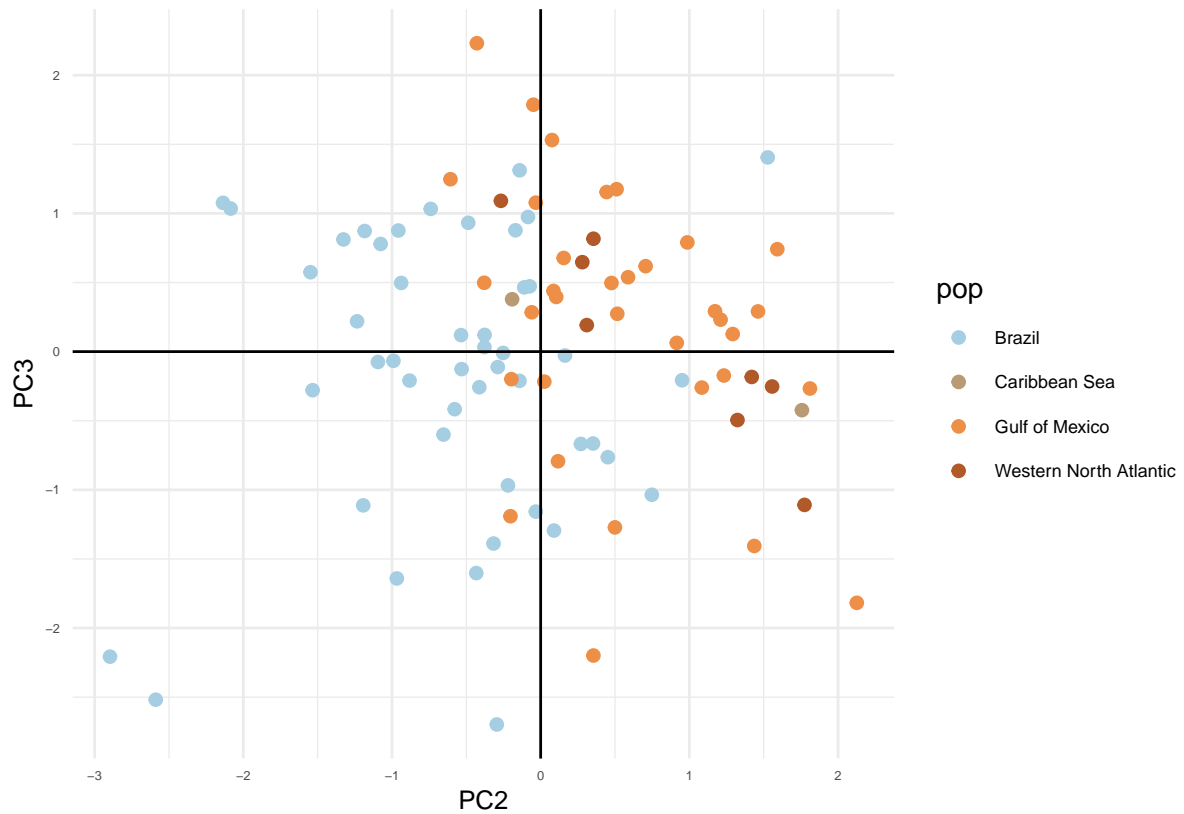

```
ggplot2::ggsave(p, filename = "DArTcap_WATL_PCA3.png", width = 30,
  height = 15, units = "cm")
```

```
p <-
ggplot2::ggplot(BS.pca.scores, ggplot2::aes(x = PC3, y = PC4, colour = pop)) +
ggplot2::geom_point(size = 2) + ggplot2::scale_color_manual(values = cols) +
ggplot2::geom_hline(yintercept = 0) + ggplot2::geom_vline(xintercept = 0) +
ggplot2::theme_minimal() +
ggplot2::theme(
  axis.text = ggplot2::element_text(size = 5),
  axis.title.x = ggplot2::element_text(size = 10),
  axis.title.y = ggplot2::element_text(size = 10),
  legend.text = ggplot2::element_text(size = 7)
)
p
```

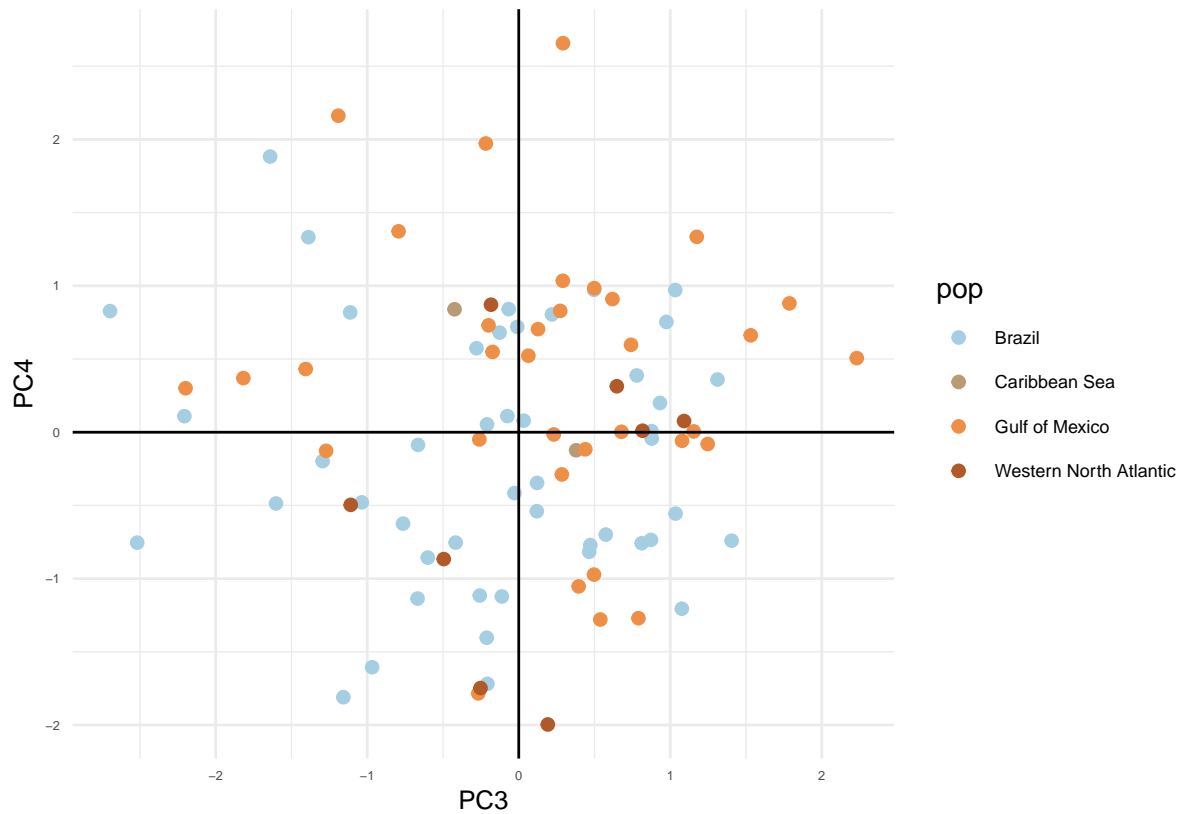

```
ggplot2::ggsave(p, filename = "DArTcap_WATL_PCA4.png", width = 30,
  height = 15,units = "cm")

p <-
ggplot2::ggplot(BS.pca.scores, ggplot2::aes(x = PC3, y = PC5, colour = pop)) +
ggplot2::geom_point(size = 2) + ggplot2::scale_color_manual(values = cols) +
ggplot2::geom_hline(yintercept = 0) + ggplot2::geom_vline(xintercept = 0) +
ggplot2::theme_minimal() +
ggplot2::theme(
  axis.text = ggplot2::element_text(size = 5),
  axis.title.x = ggplot2::element_text(size = 10),
  axis.title.y = ggplot2::element_text(size = 10),
  legend.text = ggplot2::element_text(size = 7)
)
p
```

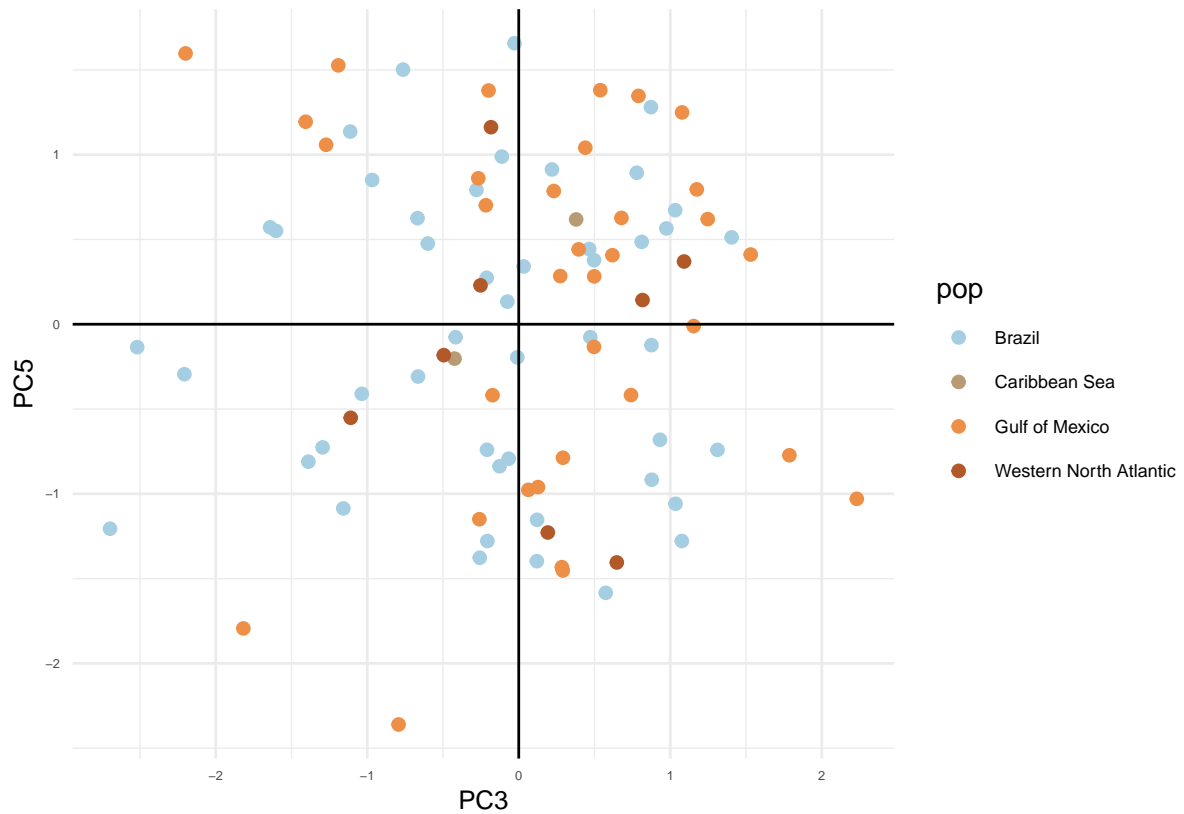

```
ggplot2::ggsave(p, filename = "DARtcap_WATL_PCA5.png", width = 30,
  height = 15, units = "cm")
```

## 10.9 DAPC

### 10.9.1 Optimal number of clusters with neutral markers

```
set.seed(124)
grp <-
  adegenet::find.clusters(
    BS.dartcap.WATL.g1,
    max.n.clust = 10,
    n.pca = adegenet::nInd(BS.dartcap.WATL.g1) / 3,
    stat = "BIC",
    parallel = TRUE,
    n.cores = parallel::detectCores() - 1
  )
```

```
save(grp, file = "DARtcap_WATL_grp.Rdata")
```

```
load("DARtcap_WATL_grp.Rdata")
```

```
y <- as.numeric(grp$Kstat)
x <- 1:10
data <- data.frame(x,y,stringsAsFactors = F)
plot <- ggplot2::ggplot(data, ggplot2::aes(x,y)) +
  ggplot2::geom_point(size = 5, shape = 1, color = "blue") +
  ggplot2::geom_line(size = 1,color = "blue") +
  ggplot2::scale_x_continuous(name = waiver(),
    breaks = seq(from = 0,
      to = nrow(BS.dartcap.WATL.g1) - 1,
```

```

                                by = 1)) +
ggplot2::labs(subtitle = "",
              y = "Bayesian Information Criterion",
              x = "Number of clusters",
              title = "",
              caption = "") +
ggplot2::theme_classic() +
ggplot2::theme(
  axis.text = ggplot2::element_text(size = 5),
  axis.title.x = ggplot2::element_text(size = 20,vjust = 0, hjust = 0.5),
  axis.title.y = ggplot2::element_text(size = 20,vjust = 2, hjust = 0.5))
print(plot)

```

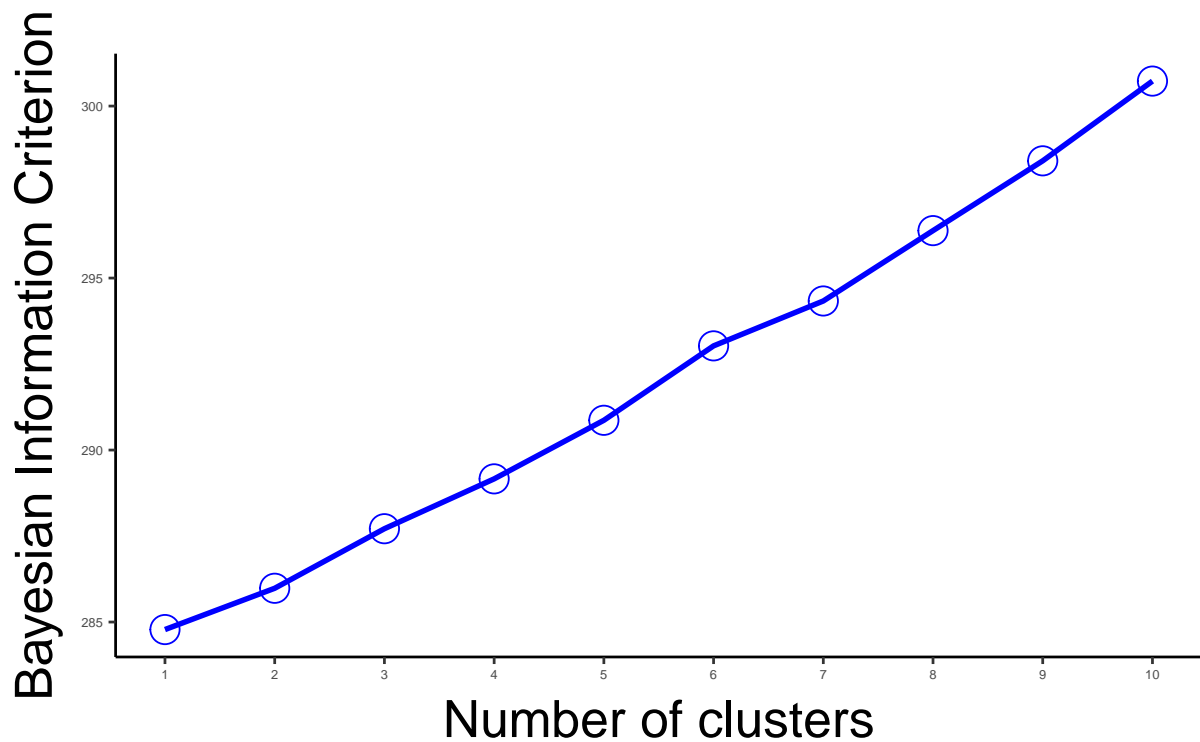

```

ggplot2::ggsave(plot, filename = "DARTcap_WATL_grp.png", width = 30,
                 height = 15,units = "cm")

```

### 10.9.2 Cross-validation to identify the optimal number of PCs

Uses a training - holdout set of individuals to check how reliable individuals can be assigned.

```

set.seed(124)
x <- BS.dartcap.WATL.g1

xval <-
  adegenet::xvalDapc(
    tab(x, NA.method = "mean"),
    adegenet::pop(x),
    n.pca = seq(1, adegenet::nInd(x), by = 10),
    training.set = 0.9,
    result = "groupMean",
    center = TRUE,
    scale = FALSE,

```

```

n.rep = 1000,
parallel = "multicore",
ncpus = 1,
xval.plot = TRUE
)
print(xval[2:6])
PC <- as.numeric(xval$`Number of PCs Achieving Lowest MSE`)

#refine the analysis
set.seed(124)
png(file="DARtcap_WATL_xval.png")
xval <-
  adegenet::xvalDapc(
    tab(x, NA.method = "mean"),
    adegenet::pop(x),
    n.pca = (PC - 15):(PC + 15),
    n.rep = 1000,
    parallel = "multicore",
    ncpus = 1,
    xval.plot = TRUE
  )
dev.off()
save(xval, file = "DARtcap_WATL_xval.rdata")

load("DARtcap_WATL_xval.rdata")
print(xval[2:6])
PC <- as.numeric(xval$`Number of PCs Achieving Lowest MSE`)

## $`Median and Confidence Interval for Random Chance`
##      2.5%      50%      97.5%
## 0.1799124 0.2468515 0.3532883
##
## $`Mean Successful Assignment by Number of PCs of PCA`
##      6      7      8      9      10      11      12      13
## 0.4011797 0.3993416 0.3917924 0.3895222 0.3781002 0.3818176 0.3772300 0.3763163
##      14      15      16      17      18      19      20      21
## 0.3724941 0.3787820 0.3765043 0.3744480 0.3960404 0.3886894 0.4241026 0.4147128
##      22      23      24      25      26      27      28      29
## 0.4074313 0.4047105 0.3907887 0.3772498 0.3712890 0.3764682 0.3709447 0.3634170
##      30      31      32      33      34      35      36
## 0.3573215 0.3559965 0.3442917 0.3289377 0.3282196 0.3141950 0.3014086
##
## $`Number of PCs Achieving Highest Mean Success`
## [1] "20"
##
## $`Root Mean Squared Error by Number of PCs of PCA`
##      6      7      8      9      10      11      12      13
## 0.6005609 0.6023505 0.6100747 0.6124445 0.6237366 0.6201820 0.6245583 0.6256715
##      14      15      16      17      18      19      20      21
## 0.6291852 0.6230769 0.6254401 0.6279443 0.6068985 0.6146509 0.5811306 0.5905123
##      22      23      24      25      26      27      28      29
## 0.5966892 0.5991244 0.6128676 0.6264447 0.6323786 0.6272664 0.6330625 0.6403656
##      30      31      32      33      34      35      36
## 0.6464854 0.6481012 0.6597074 0.6747974 0.6761027 0.6901762 0.7027381
##
## $`Number of PCs Achieving Lowest MSE`
## [1] "20"

```

```

dapc.all.object.names <- c()
for (K in 2:10) {
  set.seed(124)
  grp <- adegenet::find.clusters(BS.dartcap.WATL.gl, n.clust = K, n.pca = PC)
  set.seed(124)
  dapc.all.neutral <- adegenet::dapc(BS.dartcap.WATL.gl, grp$grp, n.da = K - 1,
                                     n.pca = PC)
  assign(paste0("dapc.all.", K), value = dapc.all.neutral)
  dapc.all.object.names <- c(dapc.all.object.names,
                             paste0("dapc.all.", K))
}
save(list = dapc.all.object.names, dapc.all.object.names,
      file = "DarTcap_WATL_DAPC.Rdata")

```

### 10.9.3 DAPC barplot

Group individuals according to DAPC posterior membership.

```

load("DarTcap_WATL_DAPC.Rdata")
for (K in 2:10) {
  colour <- colours.prior[1:K]
  dapc <- get(dapc.all.object.names[K - 1])
  post <- as.matrix(dapc$posterior)
  colnames(post) <- paste0("Group", 1:nlevels(dapc$grp))
  locations <- BS.dartcap.WATL.gl$pop

  plot.dapc.FDD(x = post,
                locations = locations,
                colour = colour,
                region.lwd = 1,
                plotTitle = paste0("DAPC: all Bull Sharks - subset Australia\n for K=",
                                     K, " & PC=", PC, sep = ""))

  dev.print(
    device = png,
    file = paste0("DarTcap_WATL_DAPC_barplot_K", K, ".png"),
    res = 300,
    width = 30,
    height = 15,
    units = "cm")
}

```



## DAPC: all Bull Sharks – subset Australia for K=2 & PC=20

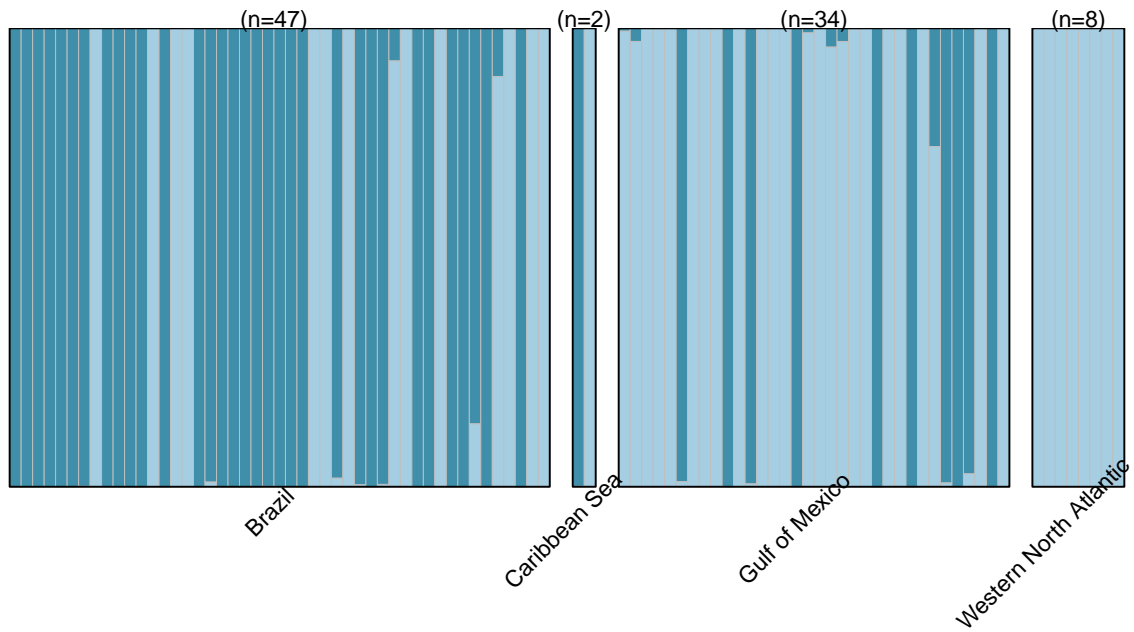

## DAPC: all Bull Sharks – subset Australia for K=3 & PC=20

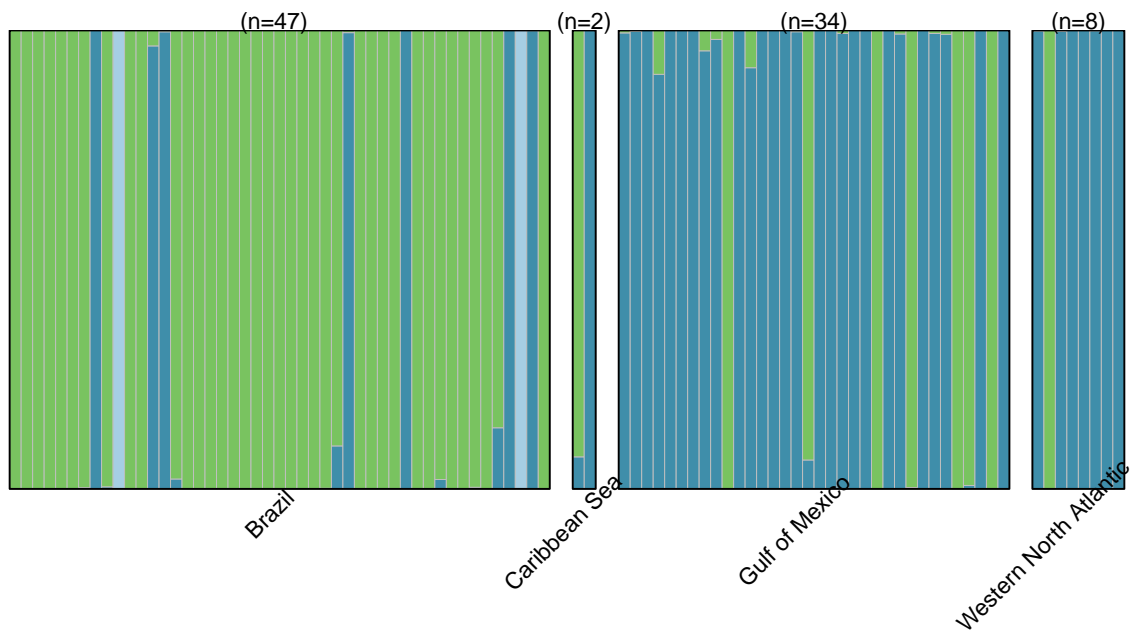

# DAPC: all Bull Sharks – subset Australia for K=4 & PC=20

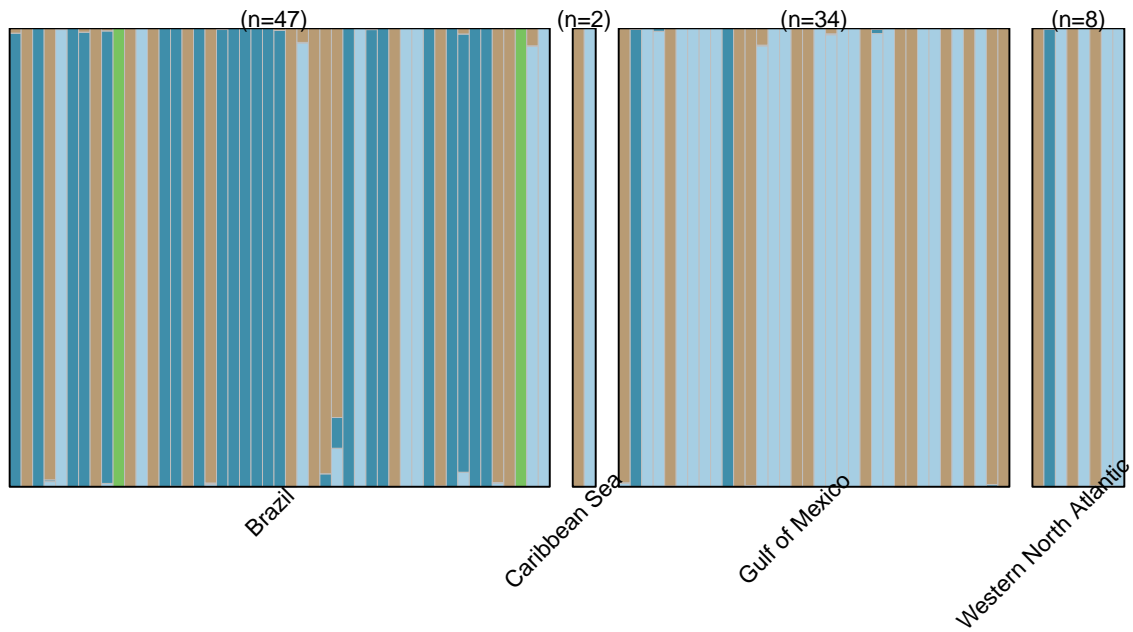

# DAPC: all Bull Sharks – subset Australia for K=5 & PC=20

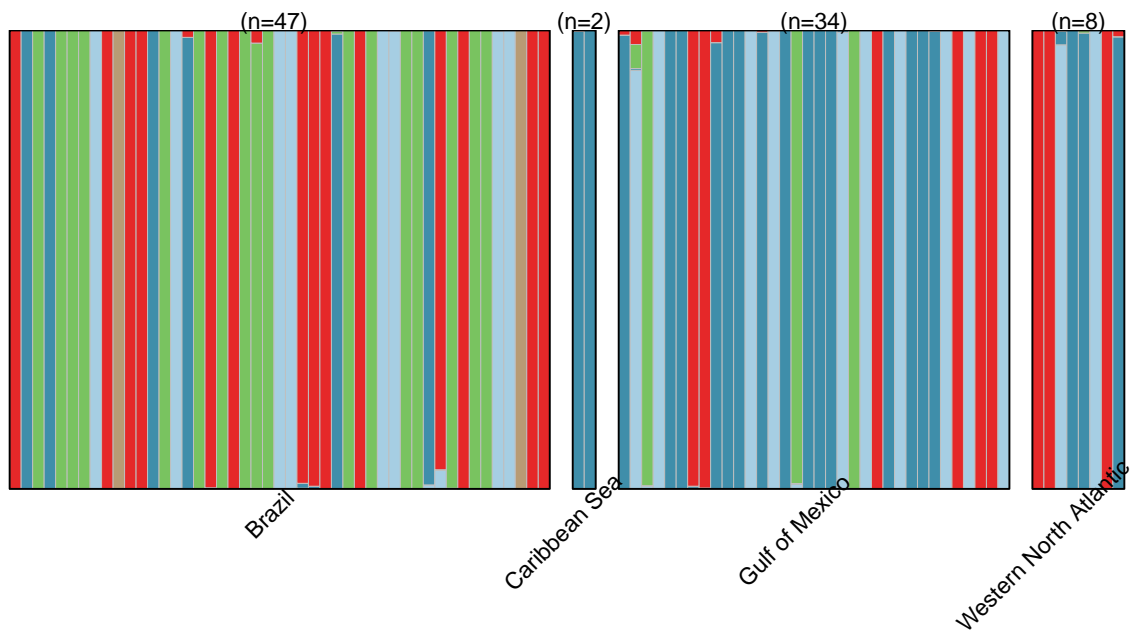

# DAPC: all Bull Sharks – subset Australia for K=6 & PC=20

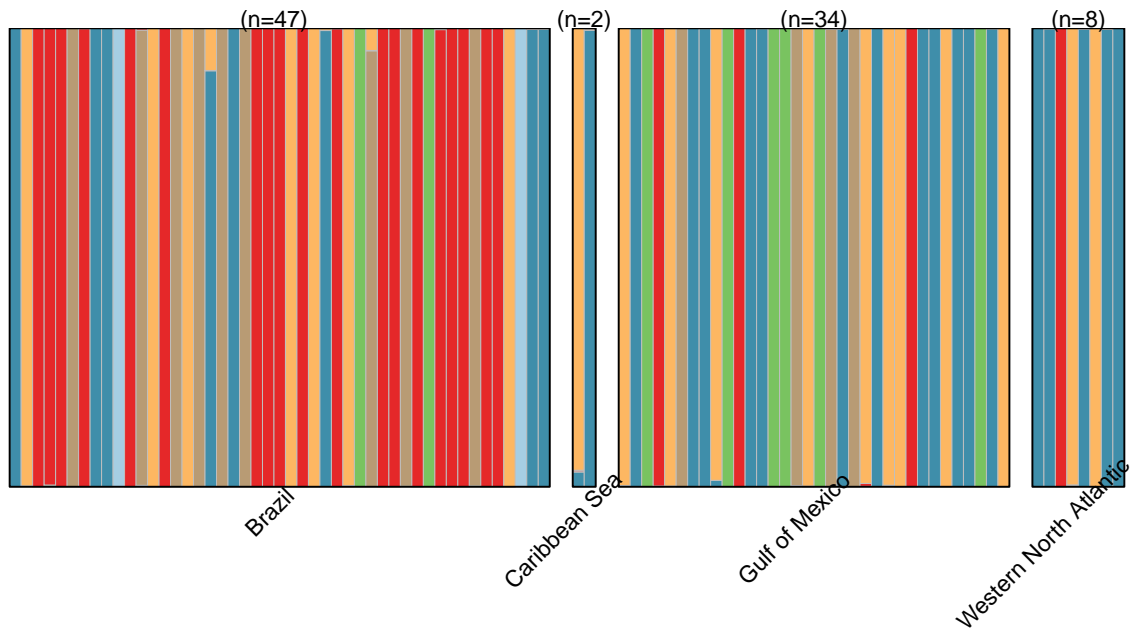

# DAPC: all Bull Sharks – subset Australia for K=7 & PC=20

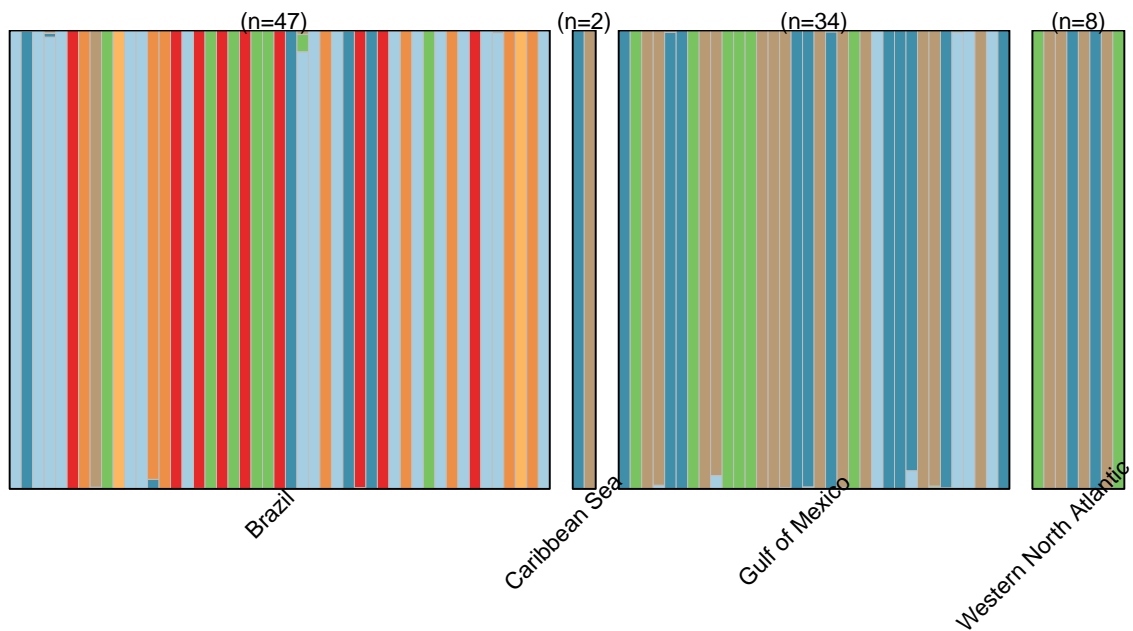

DAPC: all Bull Sharks – subset Australia  
for K=8 & PC=20

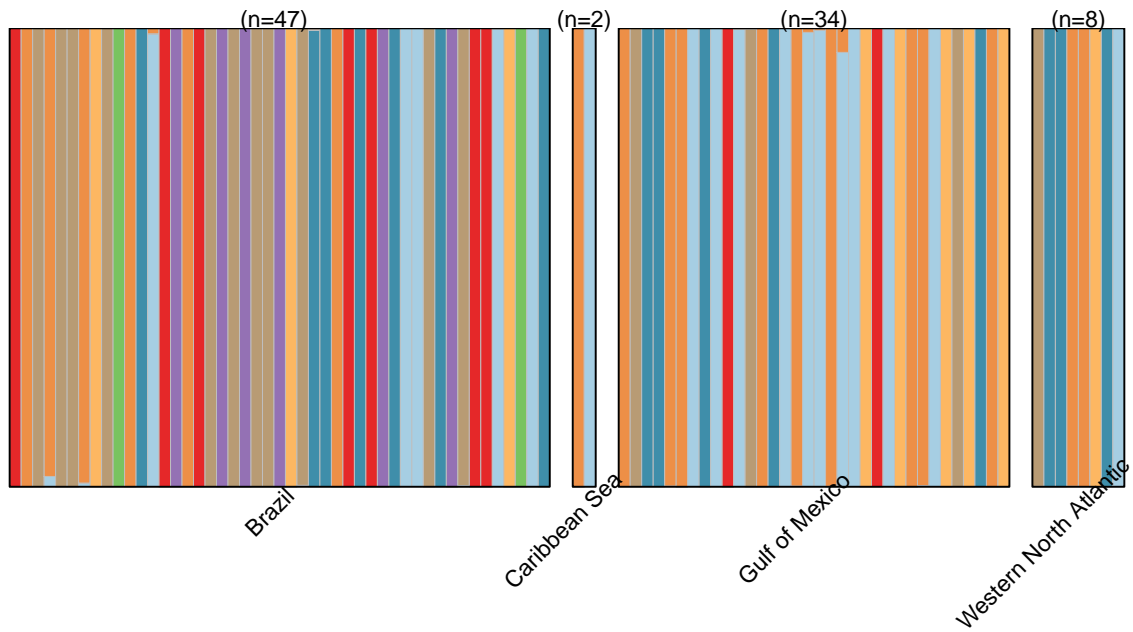

DAPC: all Bull Sharks – subset Australia  
for K=9 & PC=20

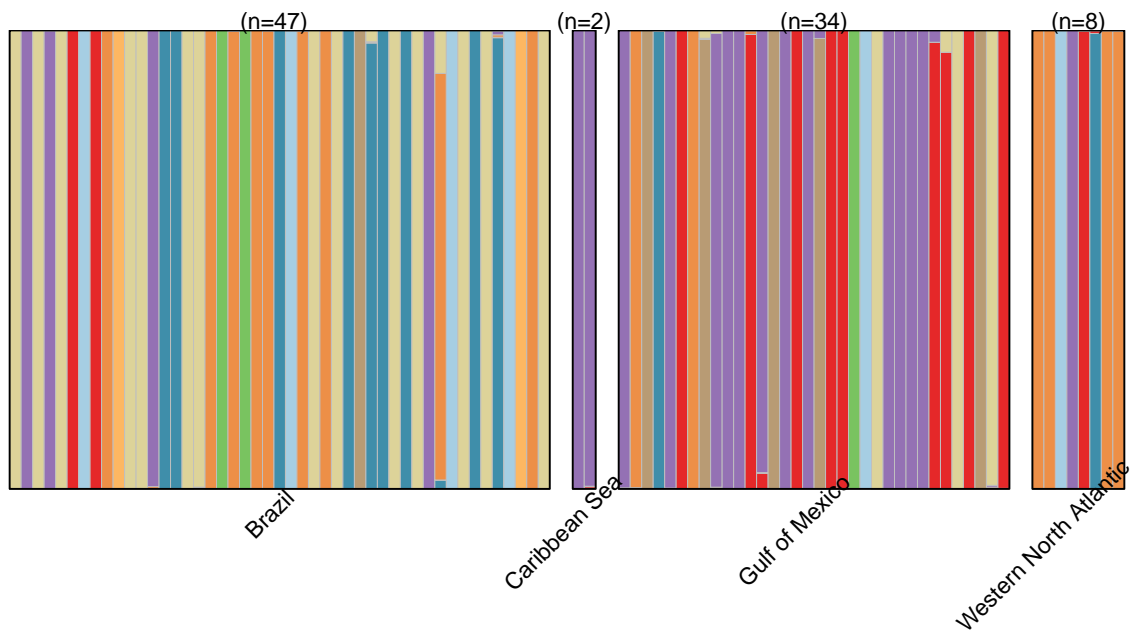

## DAPC: all Bull Sharks – subset Australia for K=10 & PC=20

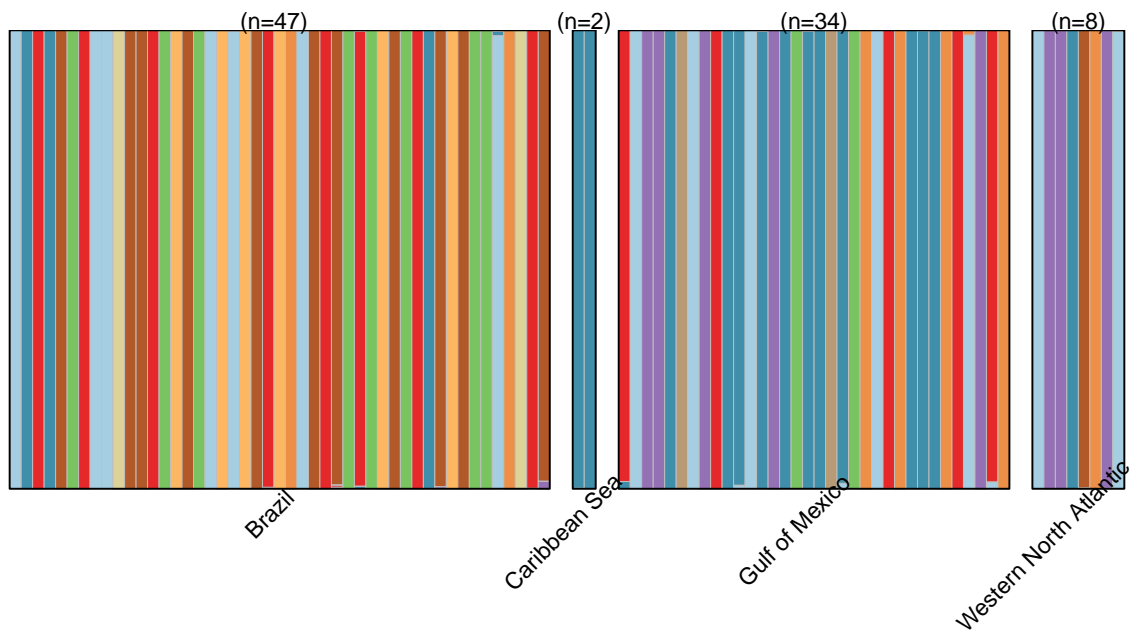

### 10.9.4 DAPC scatterplot

```
load("DArTcap_WATL_DAPC.Rdata")

for (K in 3:10) {
  dapc <- get(dapc.all.object.names[K - 1])
  if (K == 2) {
    posi.leg <- "bottomright"
  } else {posi.leg <- "bottomleft"}
  dapc.plot <- ade4::scatter(dapc, grp = pop(BS.dartcap.WATL.g1), cex = 2,
    legend = TRUE, col = colours.4, clabel = FALSE,
    posi.leg = posi.leg, scree.pca = FALSE,
    posi.pca = "topleft", cleg = 0.75, xax = 1,
    yax = 2, inset.solid = 0.3)

  dev.print(
    device = png,
    file = paste0("DArTcap_WATL_DAPC_scatterplot_K", K, ".png"),
    width = 30,
    height = 15,
    units = "cm",
    res = 300
  )
}
```

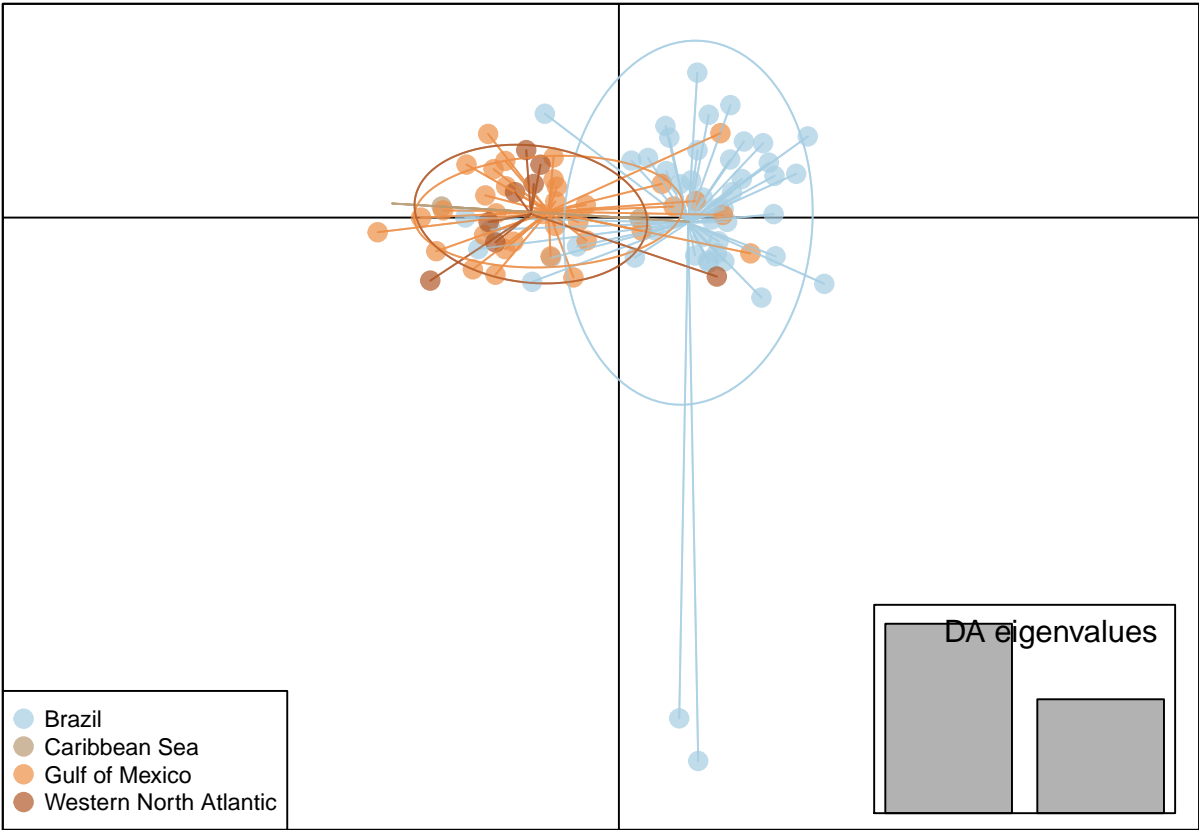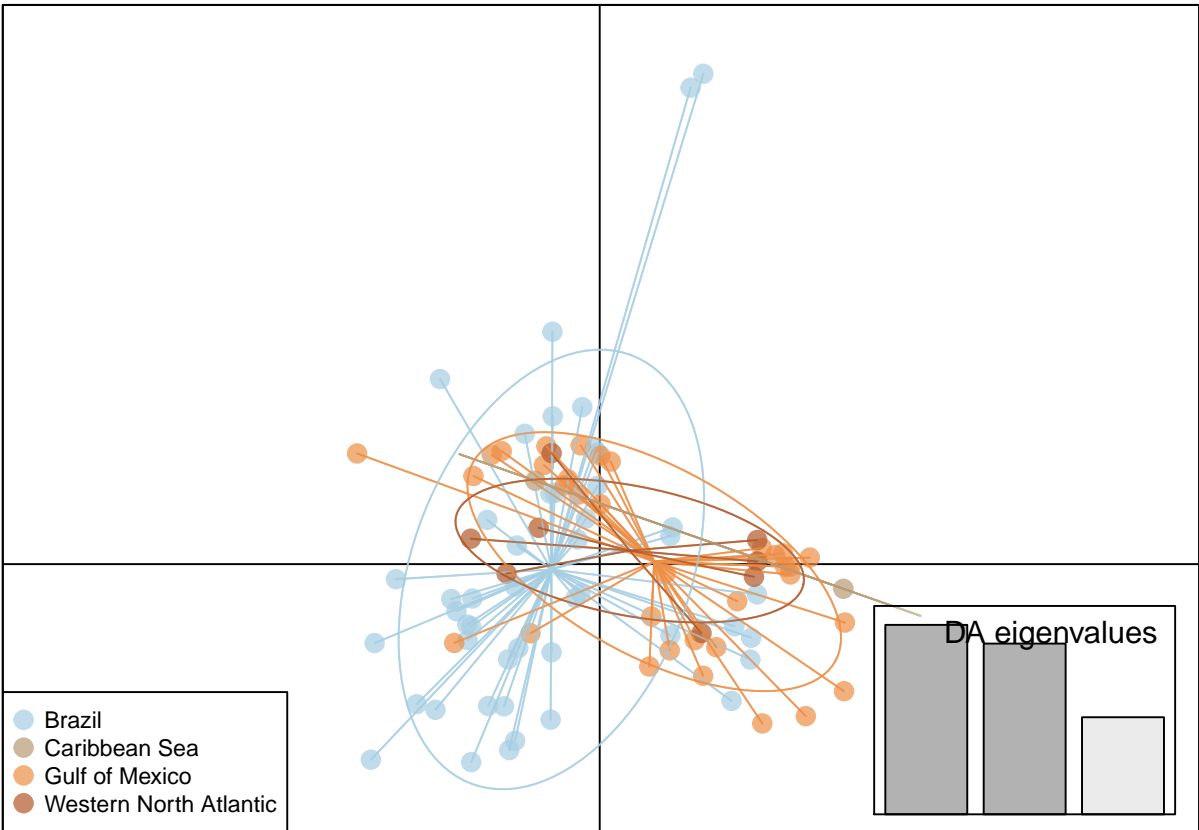

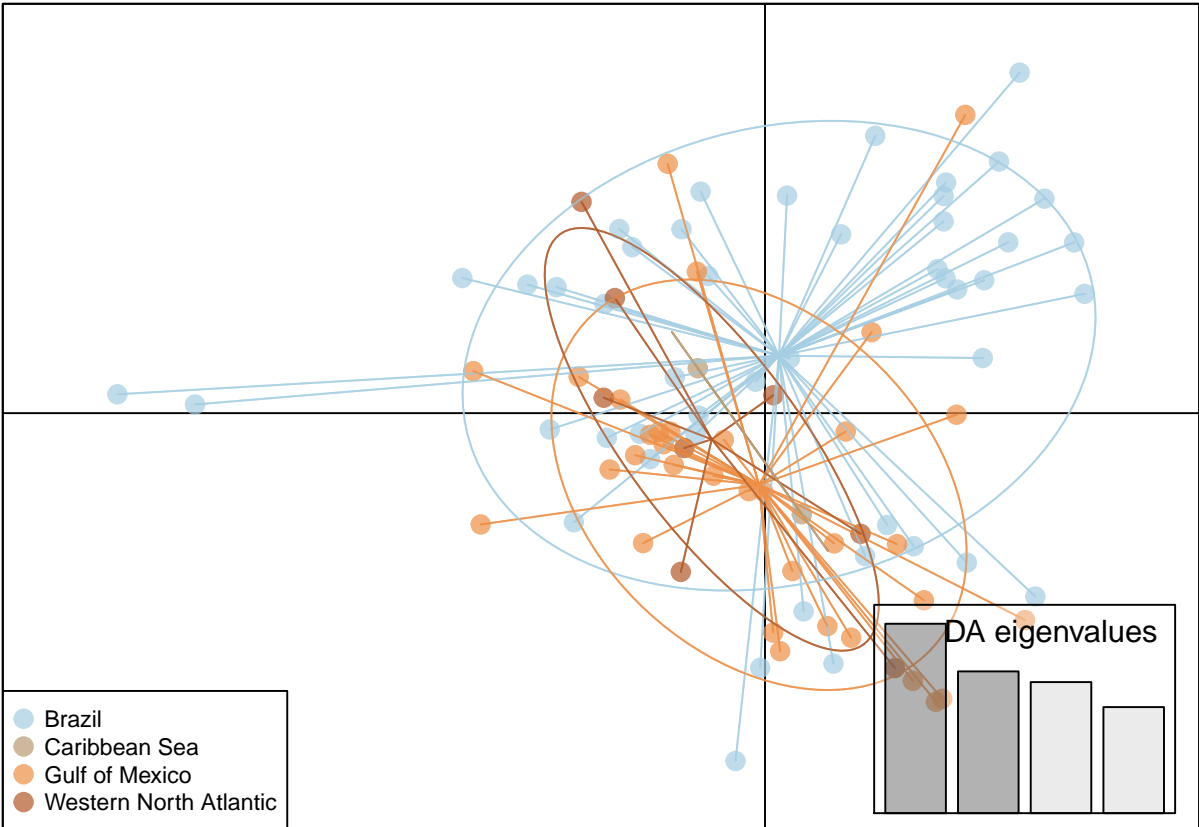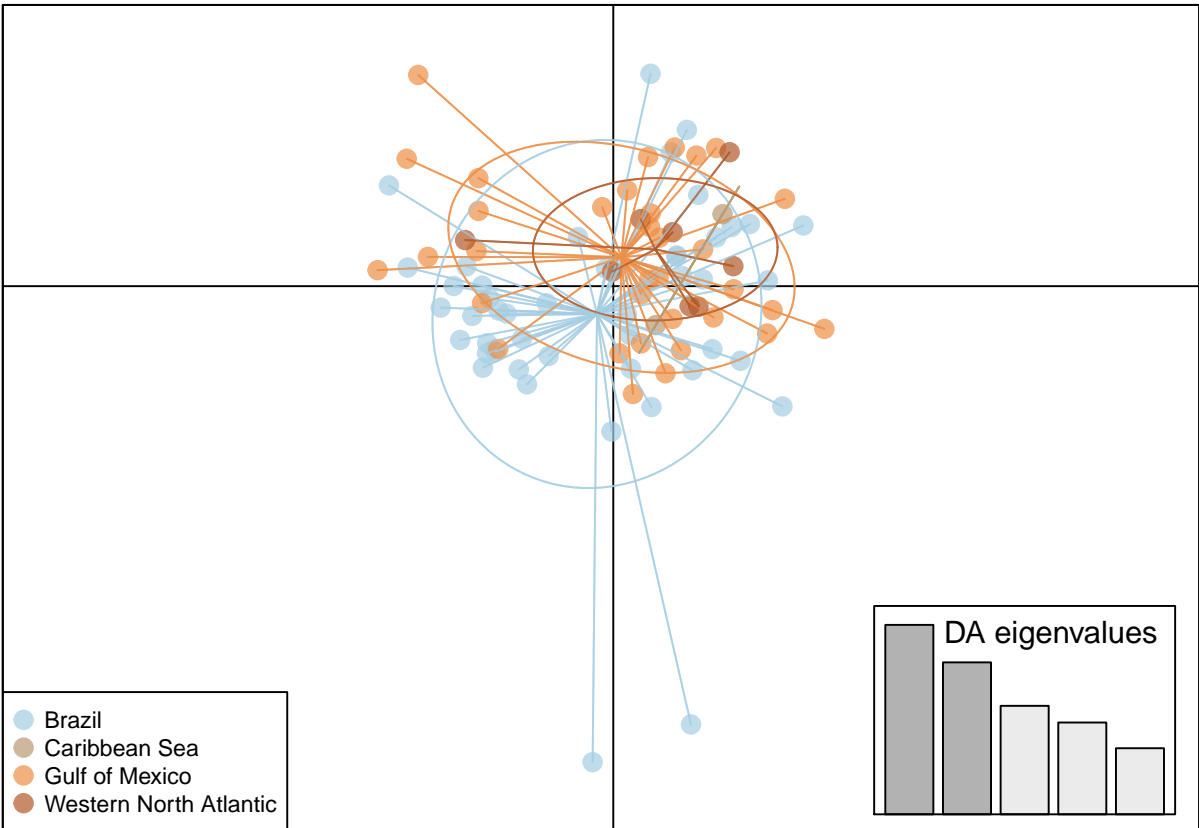

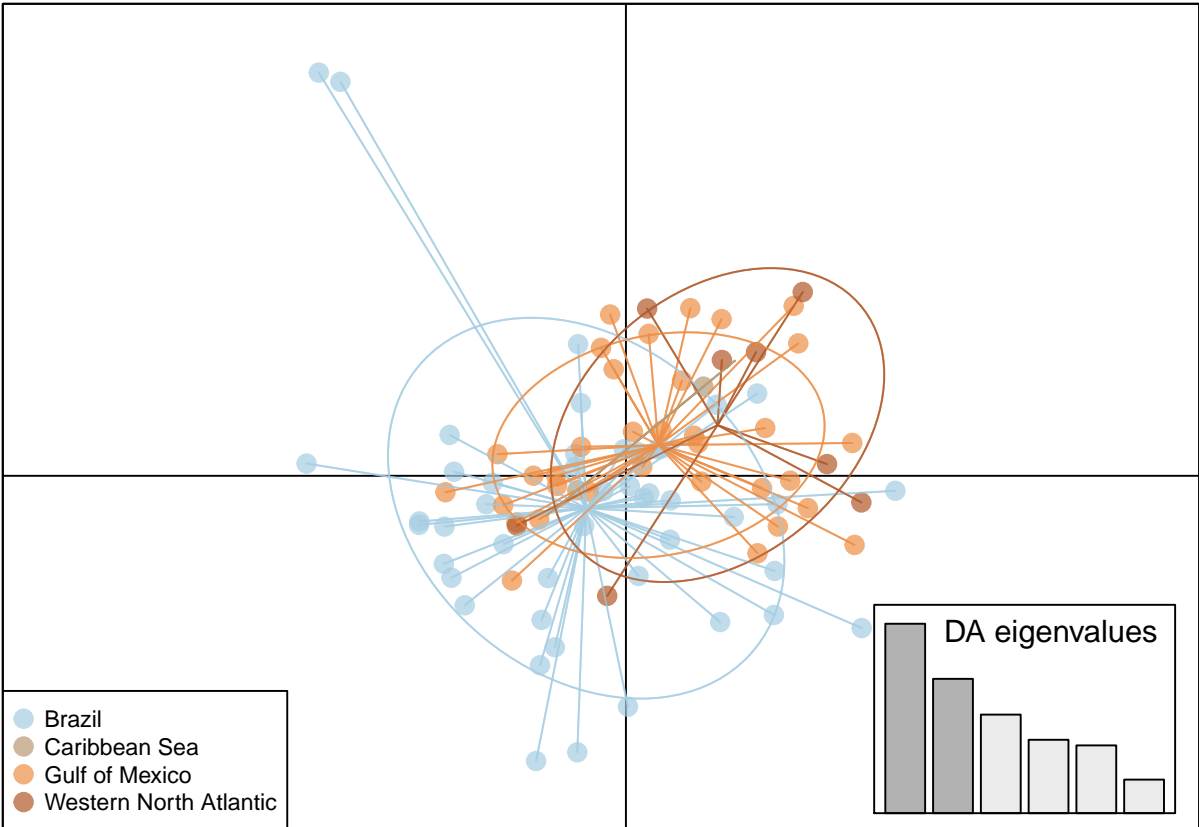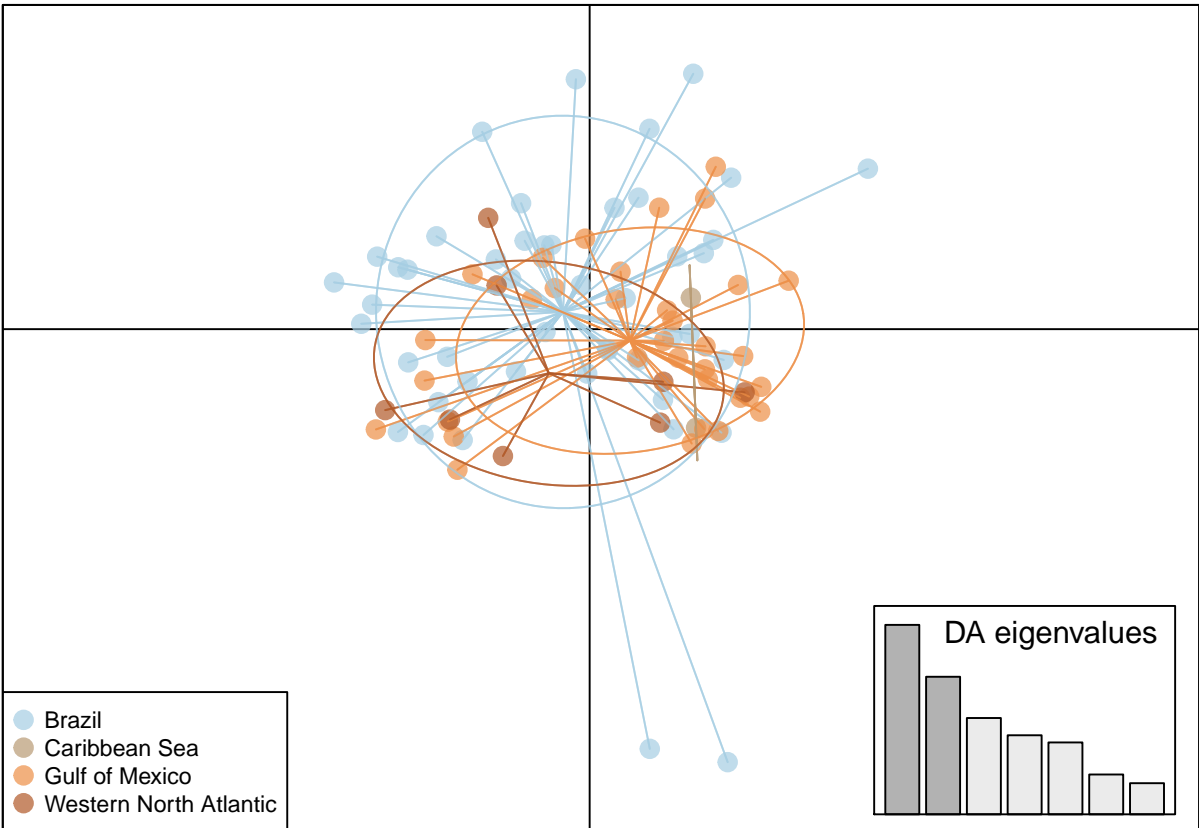



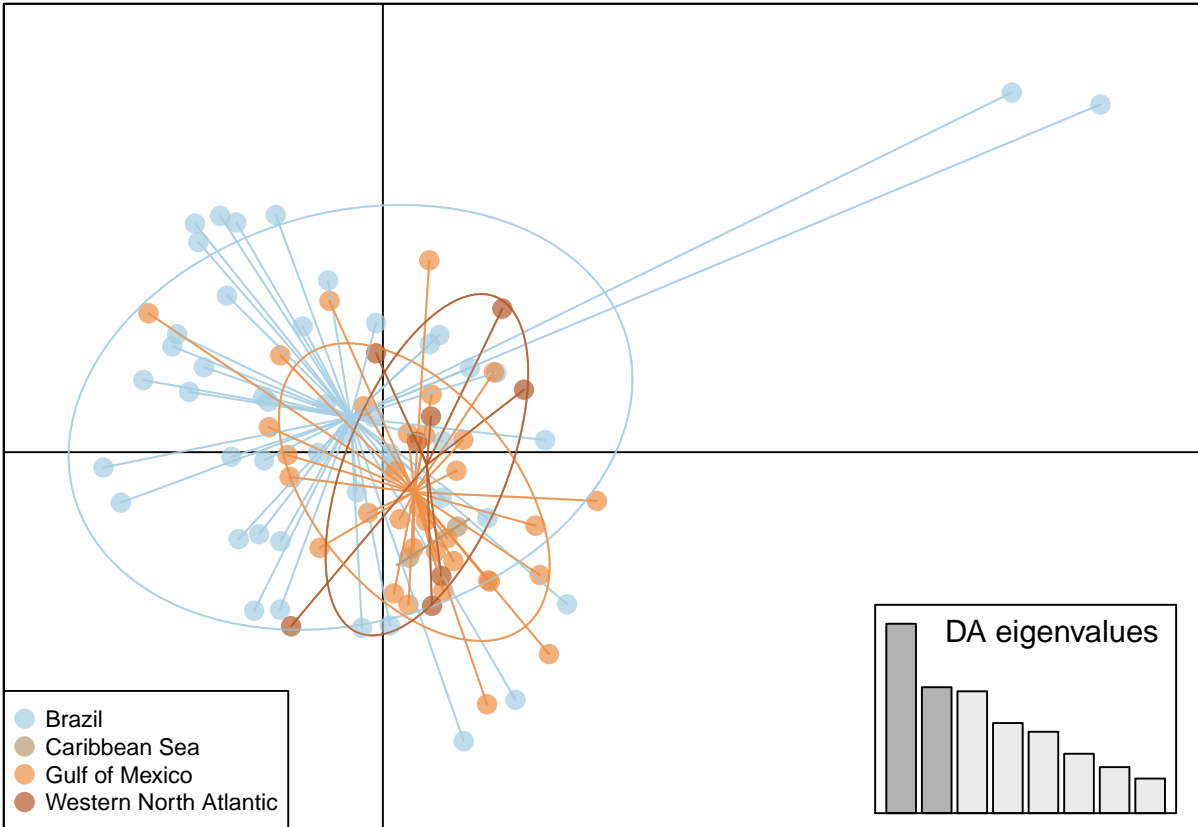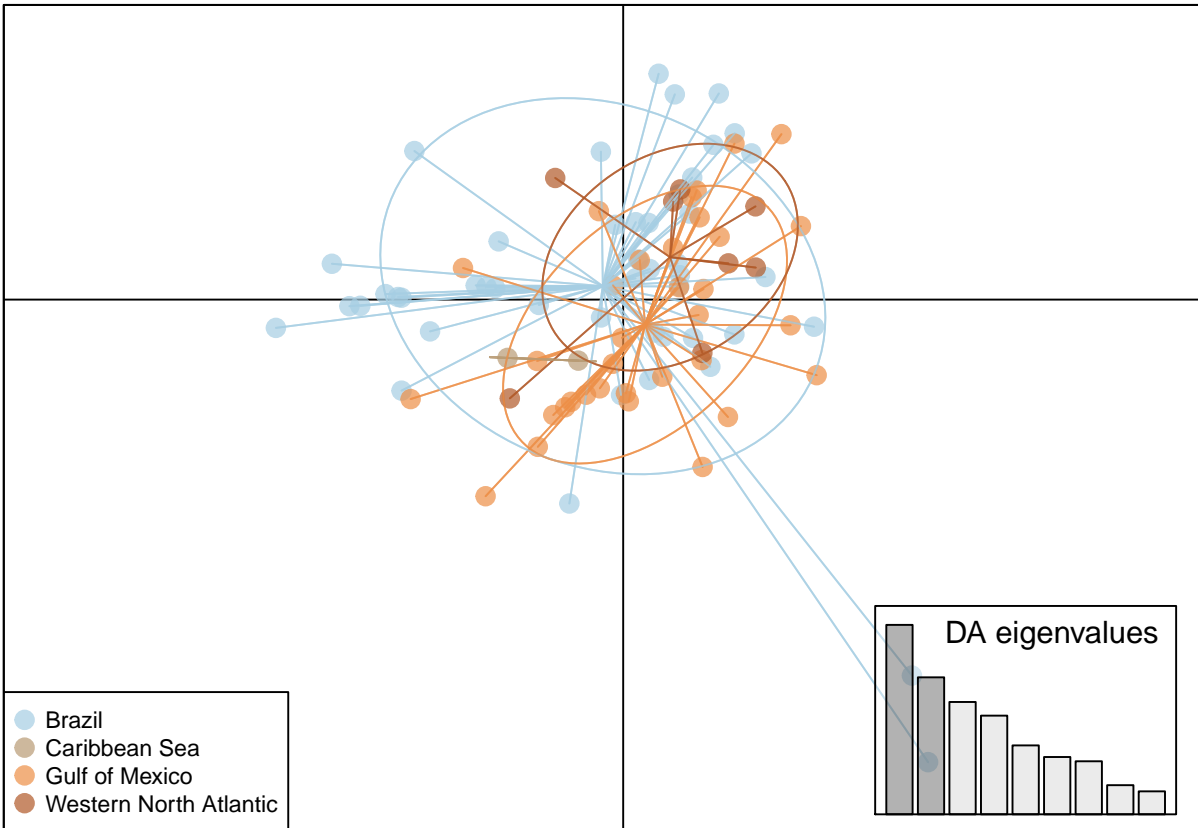

```

for (K in 2:10) {
  colour <- colours.prior[1:K]
  dapc <- get(dapc.all.object.names[K - 1])
  dapc.plot <- ade4::scatter(dapc, cex = 2, legend = TRUE, col = colour,
                             clabel = FALSE, posi.leg = "bottomleft",

```

```

        scree.pca = FALSE, posi.pca = "topleft",
        cleg = 0.75, xax = 1, yax = 2,
        inset.solid = 0.3)

dev.print(
  device = png,
  file = paste0("DArTcap_WATL_DAPC_scatterplot_pergroups_K",
                K, ".png"),
  width = 30,
  height = 15,
  units = "cm",
  res = 300
)
}

```

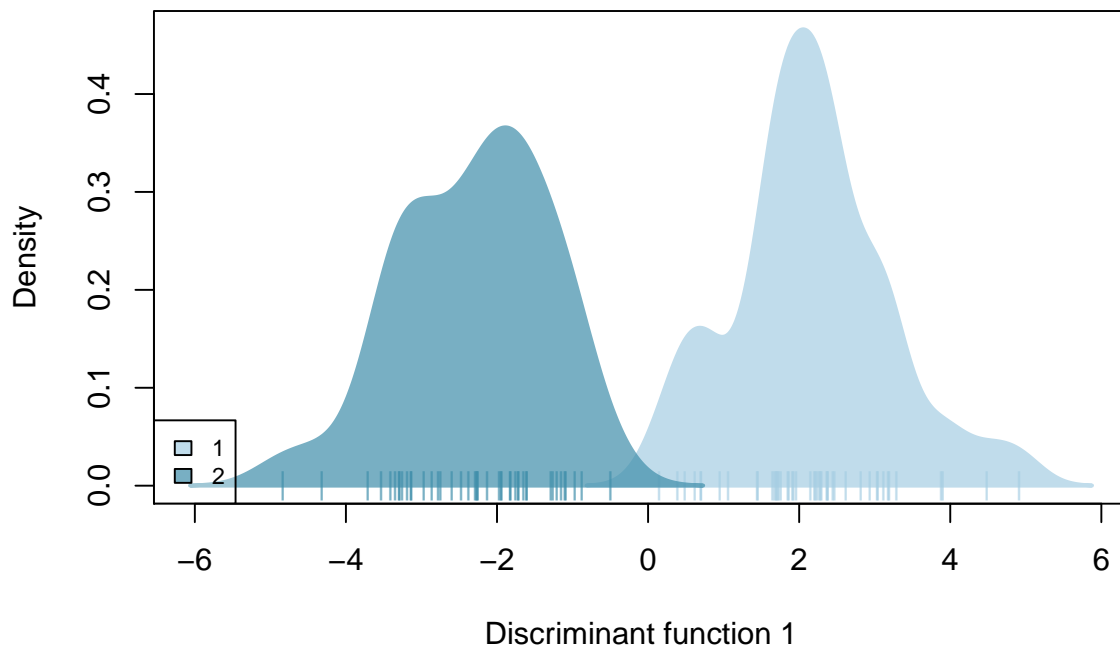

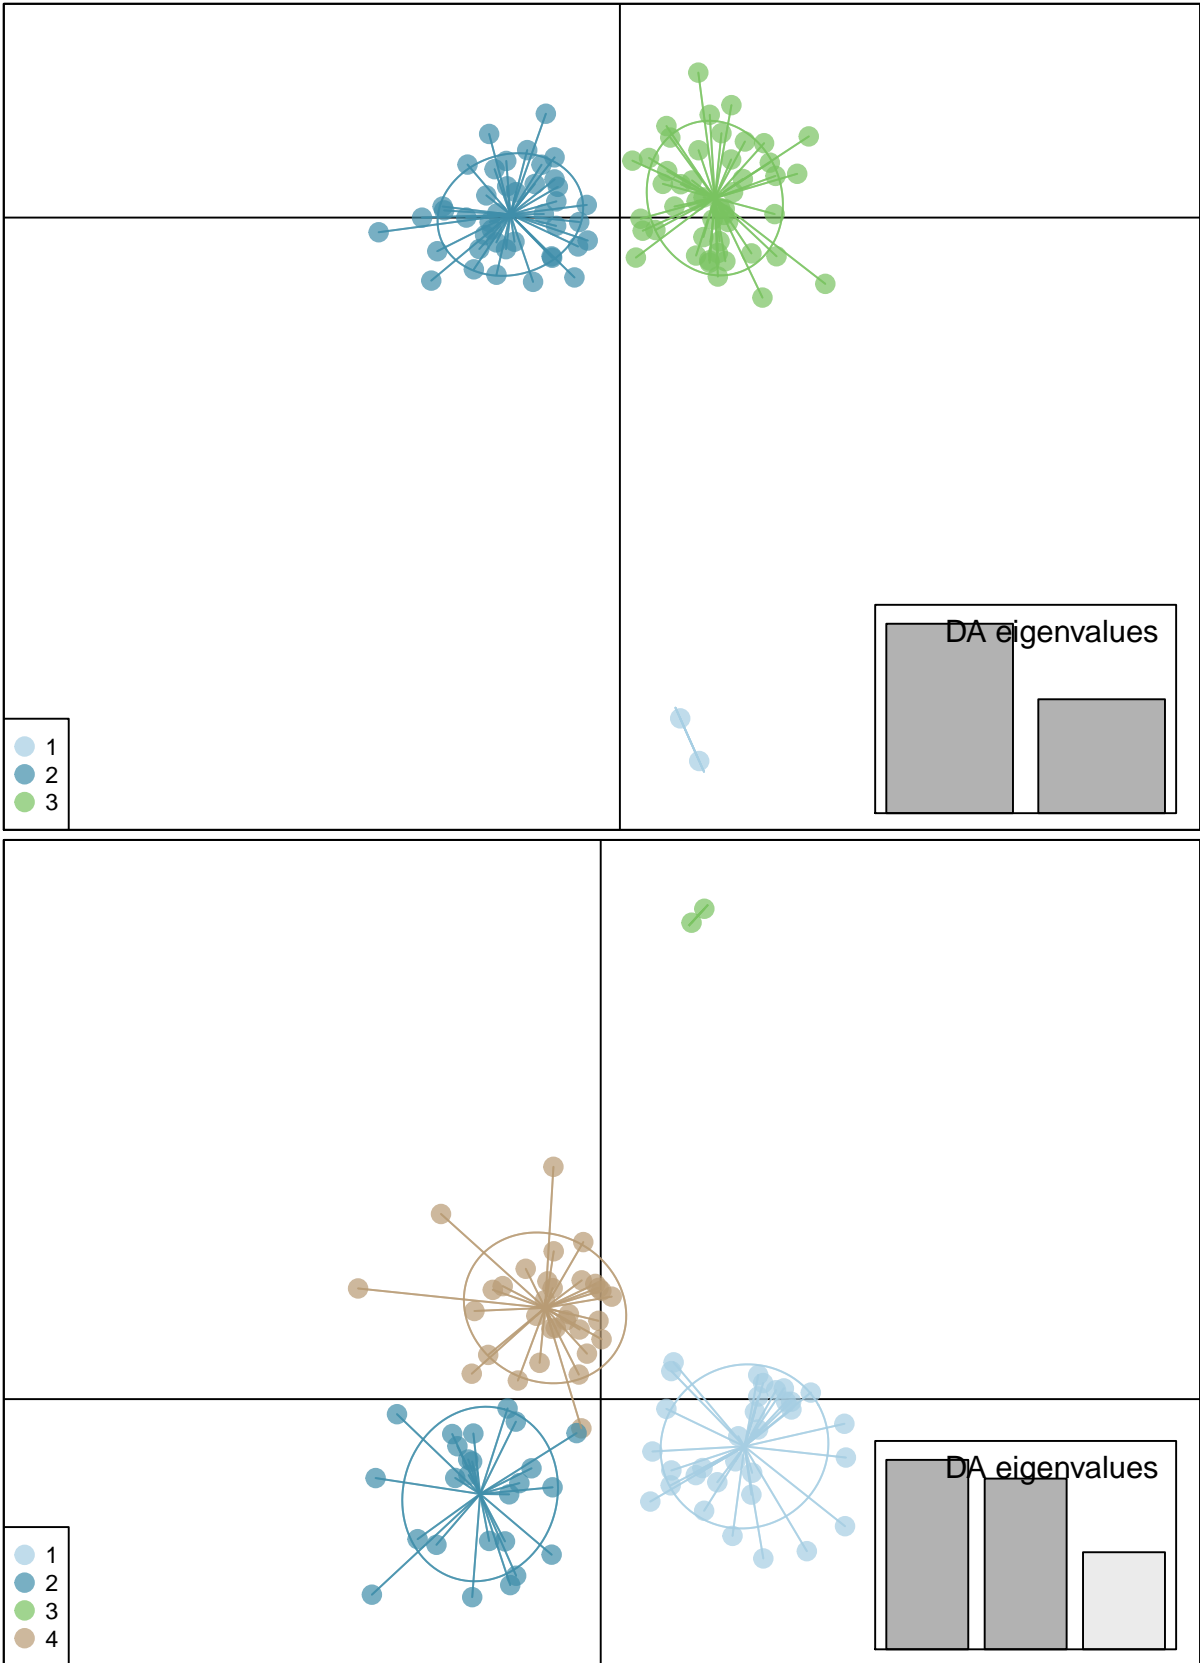

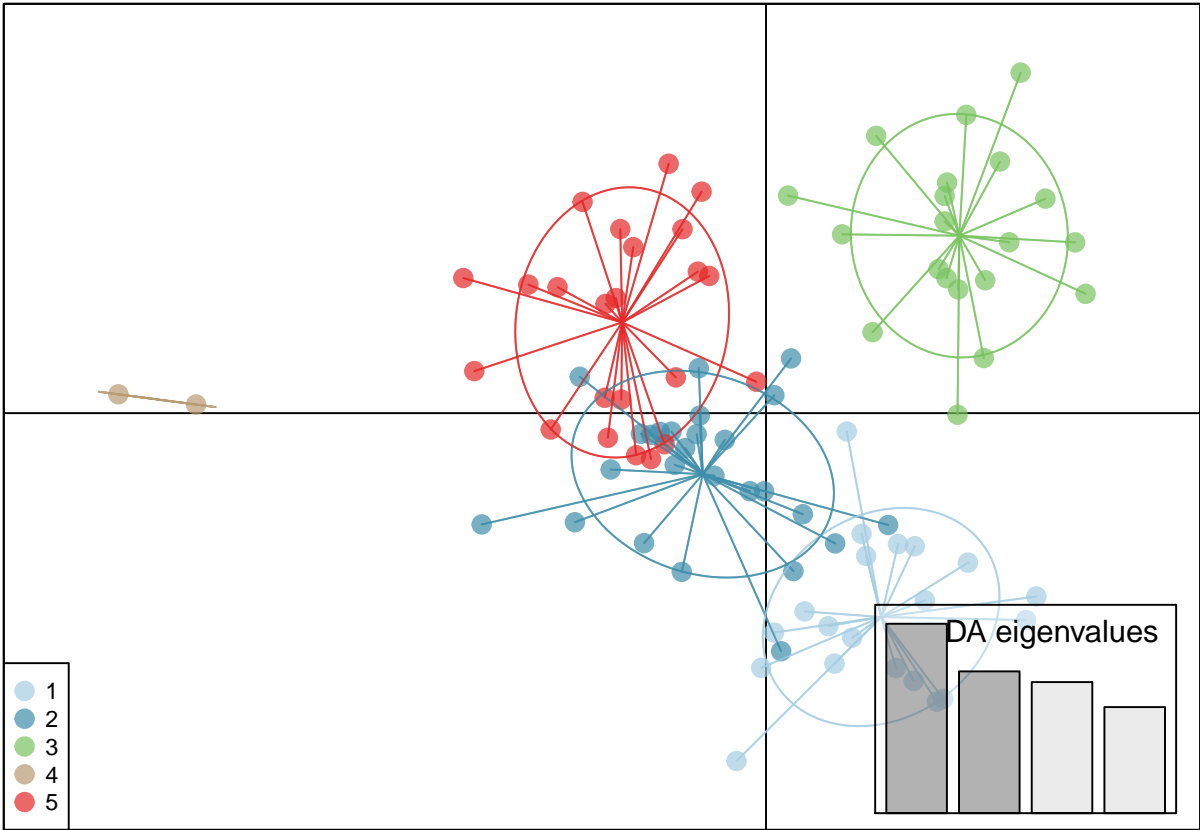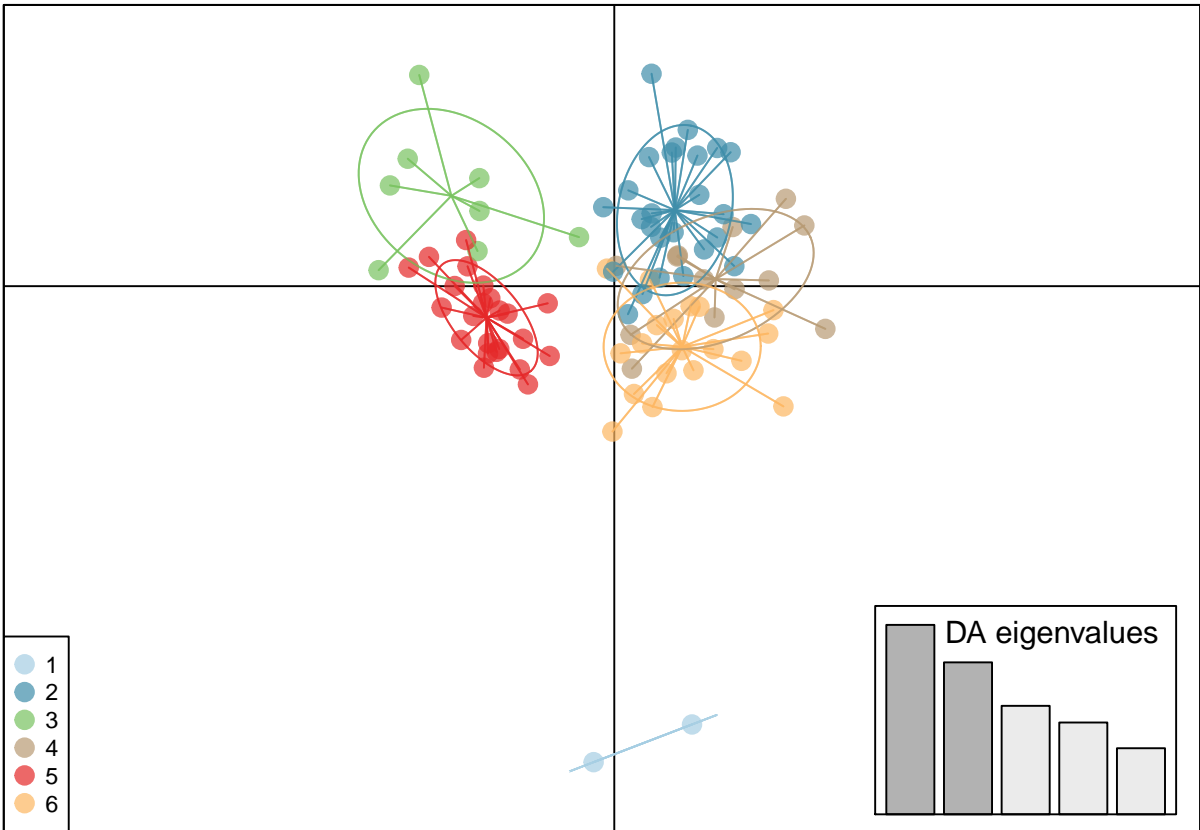

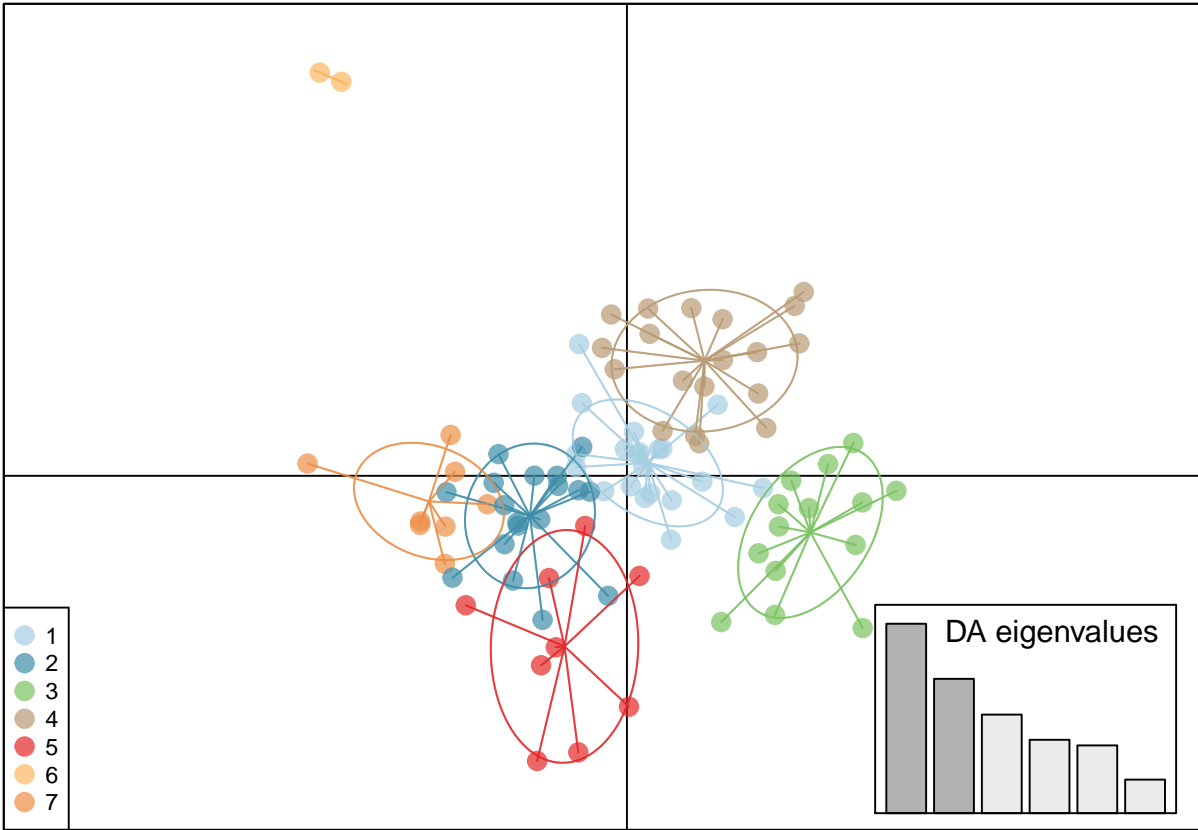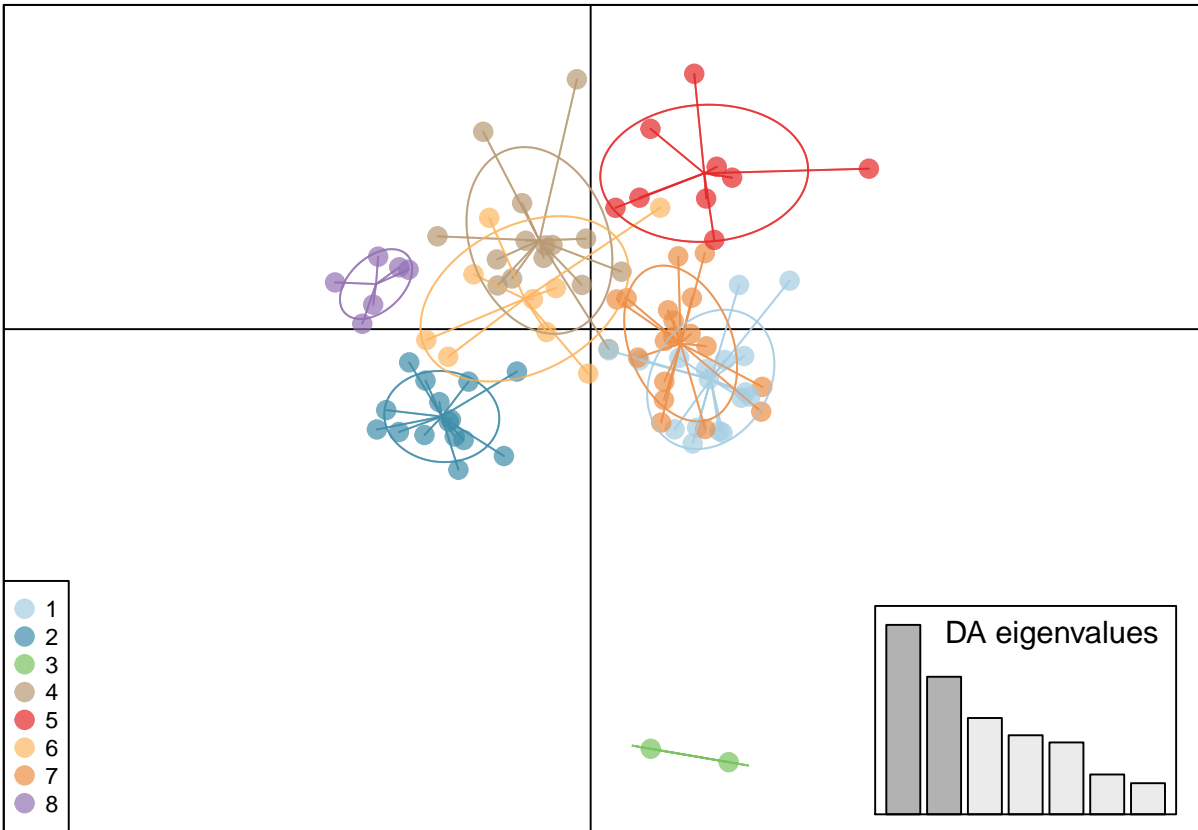

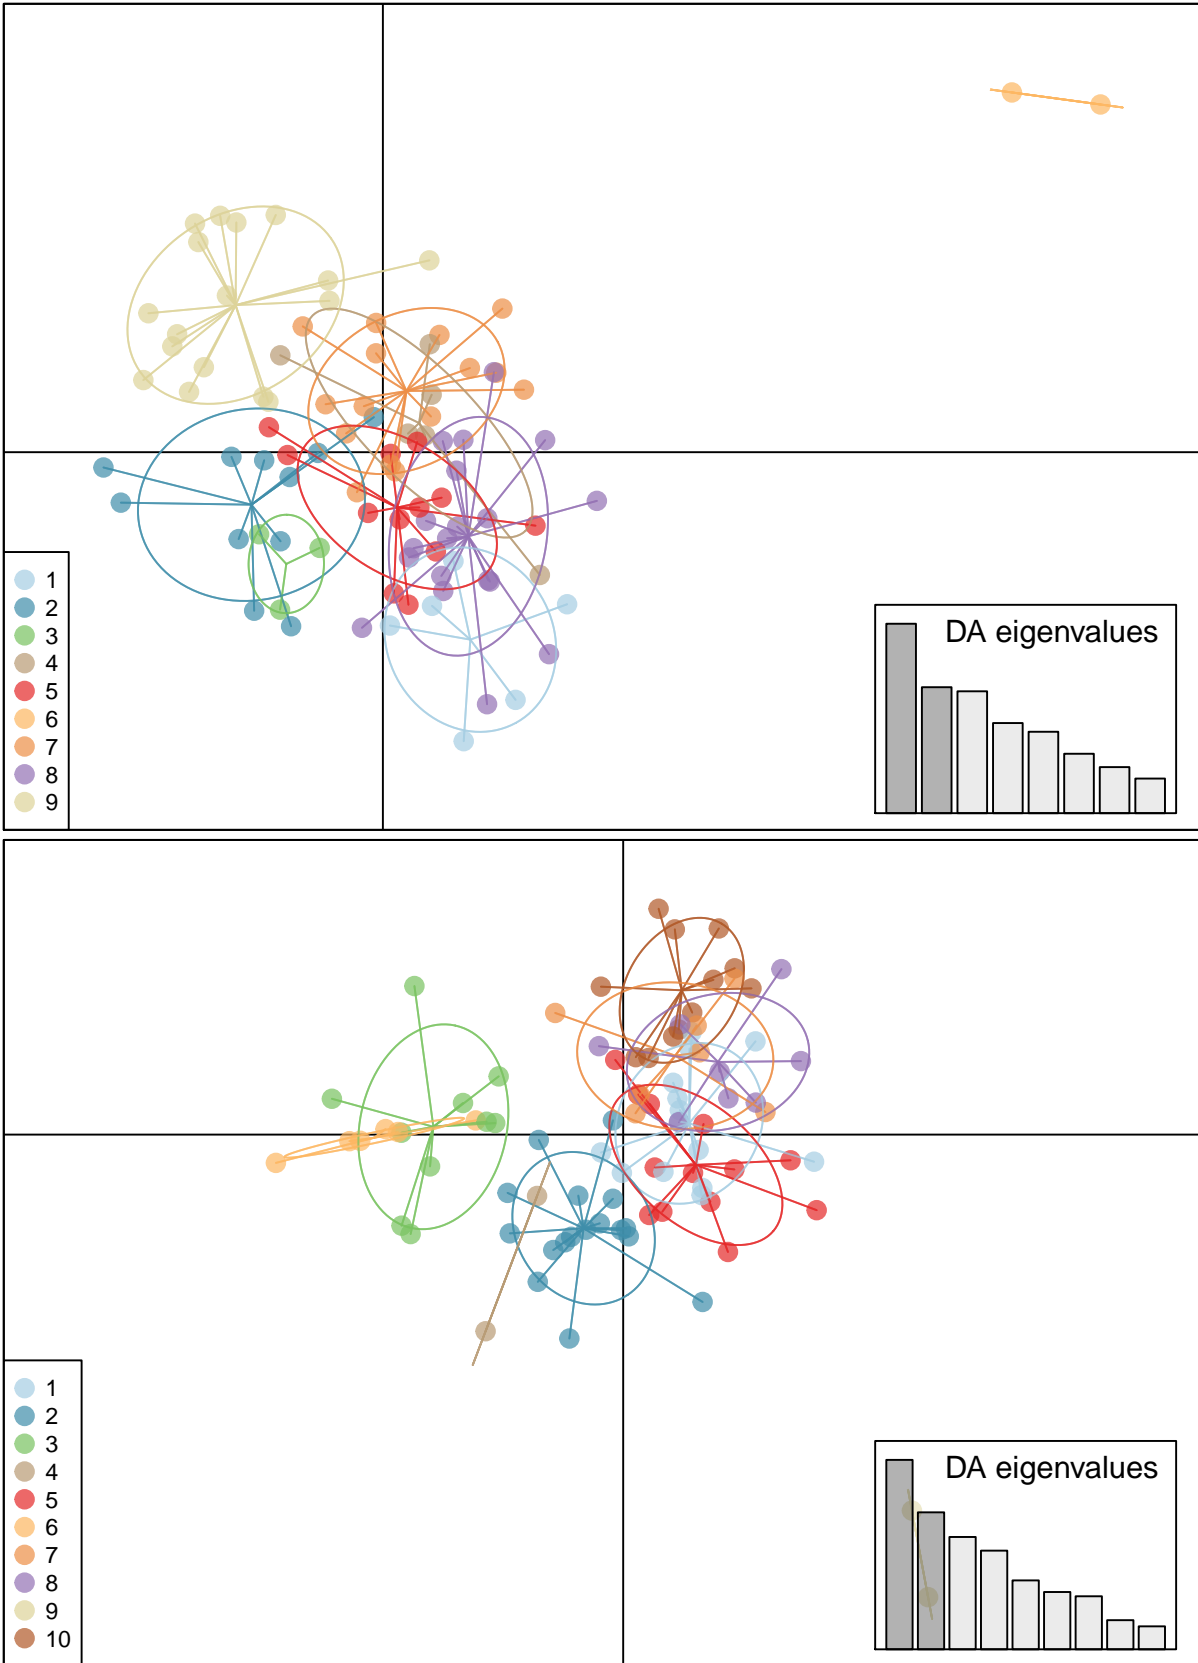

**10.9.5 DAPC scatterplot - FLO**

This code will *colour* individuals according to *sampling location* and **group** individuals according to DAPC **posterior membership**.

```

for (K in 3:10) {
  dapc <- get(dapc.all.object.names[K - 1])
  x <- dapc$ind.coord[,1]
  y <- dapc$ind.coord[,2]
  group <- paste("Group", as.numeric(dapc$assign))
  pop <- BS.dartcap.WATL.gl$pop
  df <- data.frame(x, y, group, pop)
  colnames(df) <- c("x", "y", "group", "pop")
  gg <- merge(df, aggregate(cbind(mean.x = x, mean.y = y) ~ group, df, mean),
              by = "group")

  plot <- ggplot2::ggplot(gg, ggplot2::aes(x, y, color = pop)) +
    ggplot2::geom_point(size = 5) +
    ggplot2::geom_point(ggplot2::aes(x = mean.x, y = mean.y), size = 5, shape = 17,
                          color = "black") +
    ggplot2::geom_segment(ggplot2::aes(x = mean.x, y = mean.y, xend = x,
                                         yend = y)) +
    ggplot2::scale_colour_manual(values = colours.4) +
    ggplot2::scale_fill_manual(values = colours.4) +
    ggplot2::geom_hline(yintercept = 0) +
    ggplot2::geom_vline(xintercept = 0) +
    ggplot2::labs(subtitle = "",
                  y = "PC2",
                  x = "PC1",
                  title = paste0("K=", K, " & PC=", PC, sep = ""),
                  caption = "") +
    ggplot2::theme_minimal() +
    ggplot2::theme(
      axis.text = ggplot2::element_text(size = 5),
      axis.title.x = ggplot2::element_text(size = 10),
      axis.title.y = ggplot2::element_text(size = 10),
      legend.text = ggplot2::element_text(size = 7))
  print(plot)
  ggplot2::ggsave(plot, filename = paste0("DArTcap_WATL_DAPC_scatterplot2_K",
                                           K, ".png"),
                   width = 30, height = 15, units = "cm")
}

```

K=3 & PC=20

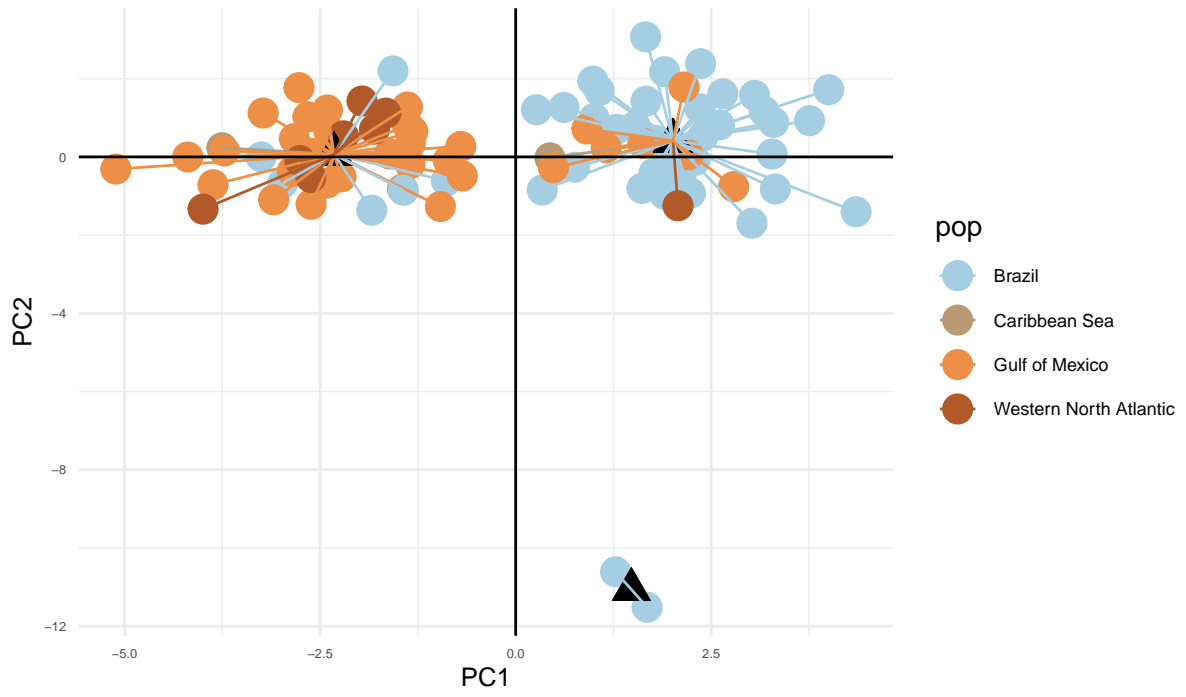

K=4 & PC=20

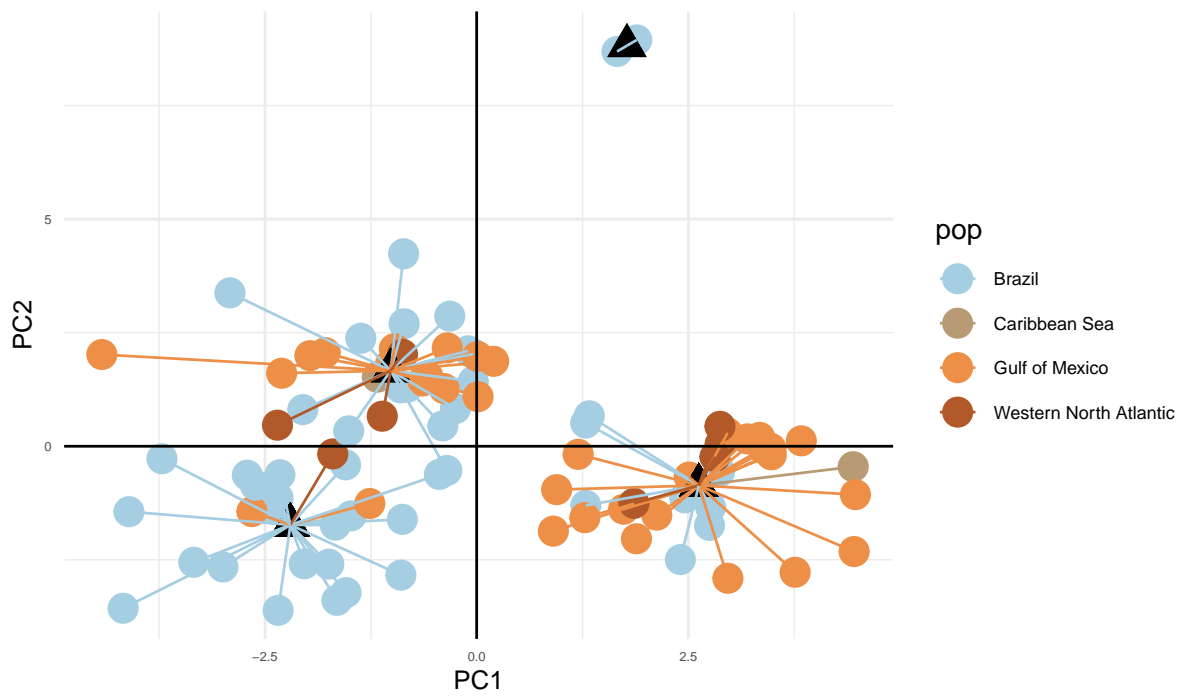



K=5 & PC=20

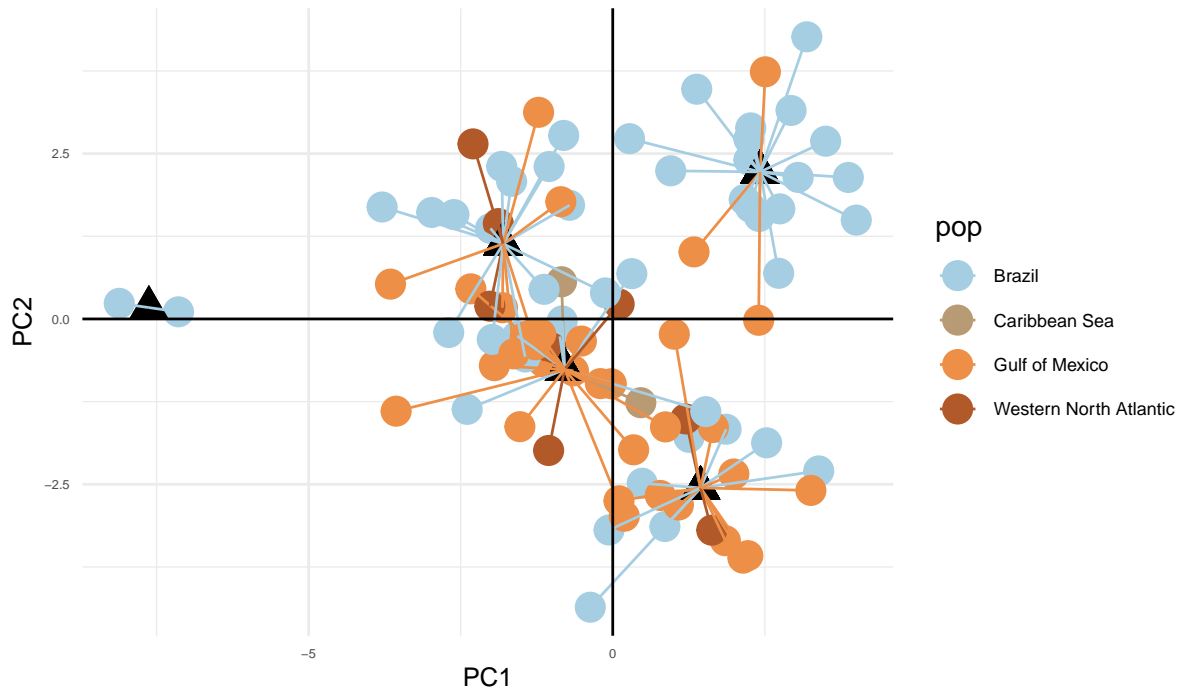

K=6 & PC=20

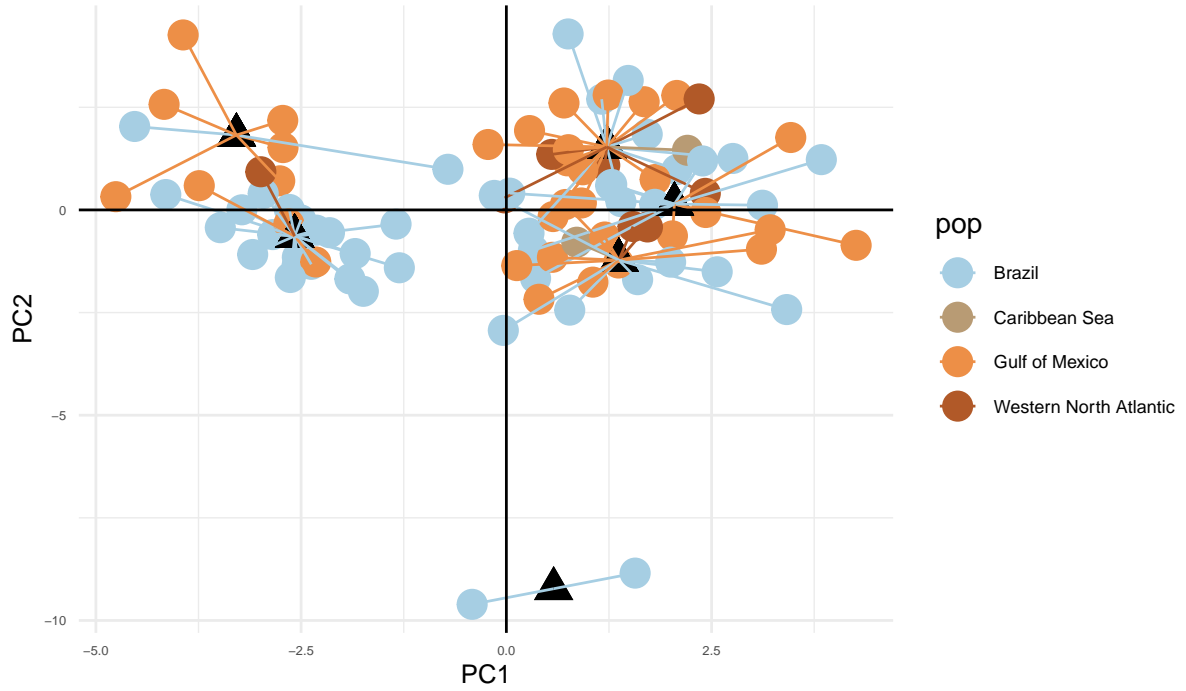

K=7 & PC=20

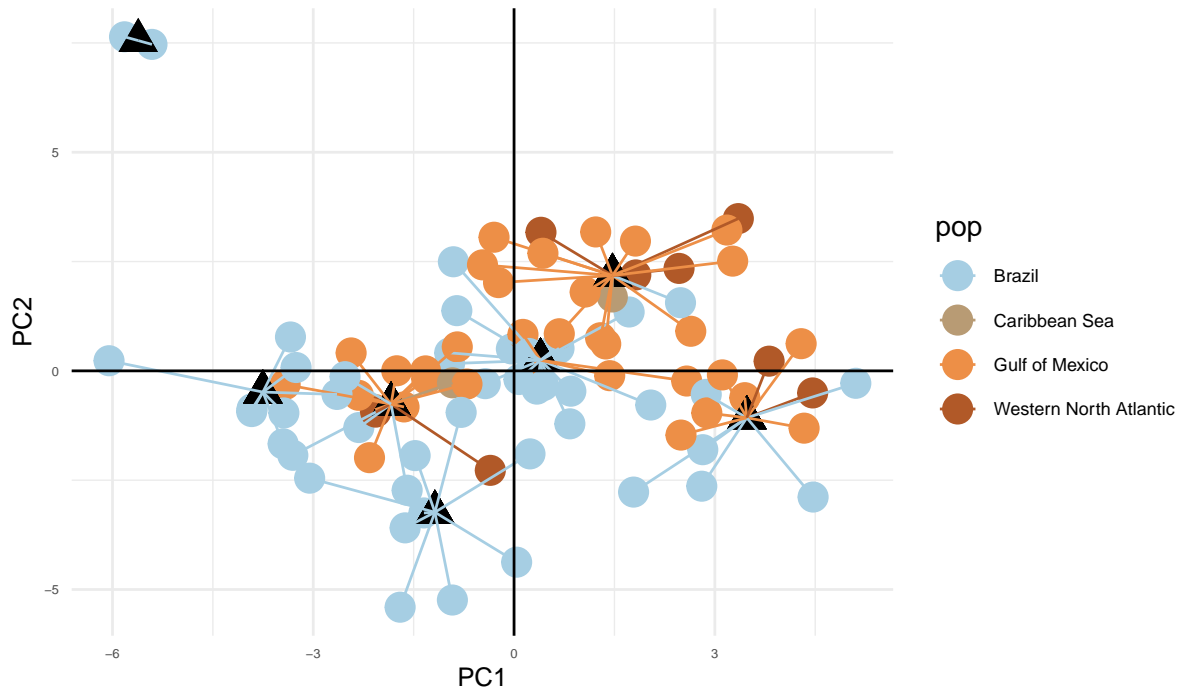

K=8 & PC=20

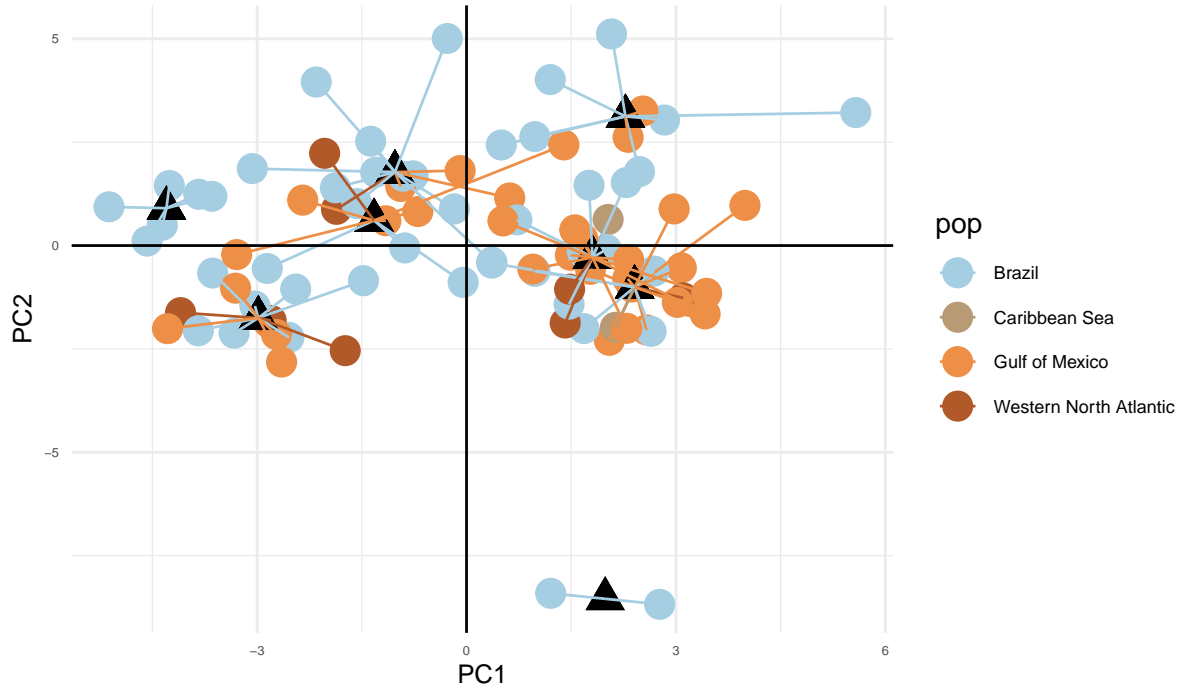

K=9 & PC=20

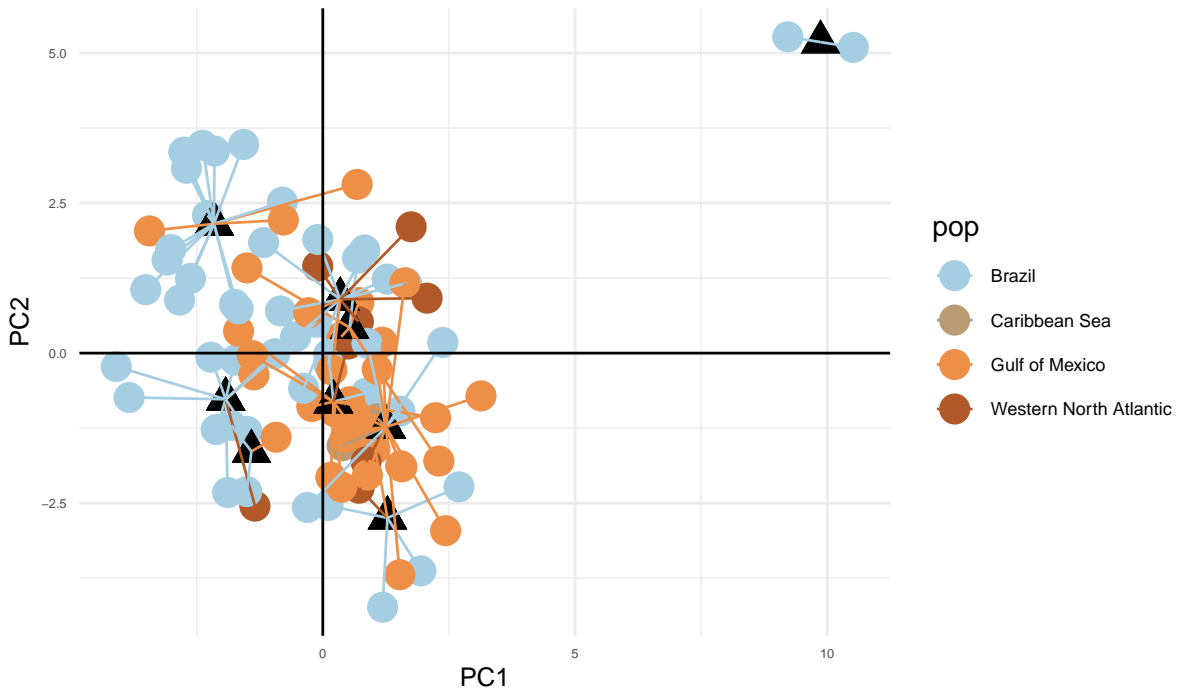

K=10 & PC=20

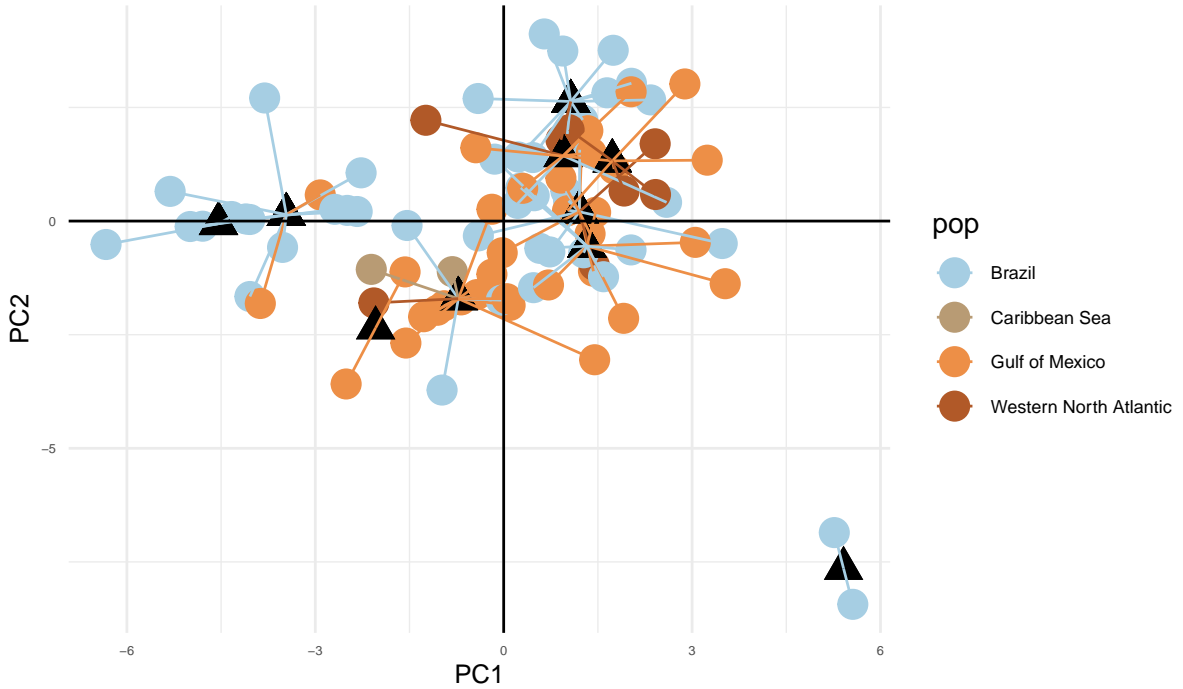

## 11 DATA5: DArTcap - Indo - West Pacific

### 11.1 Set strata

```
strata <- radiator::read_strata("Bull_shark_DArTcap_strata.tsv",
                              keep.two = FALSE)$strata %>%
  dplyr::filter(SpeciesID_genetic == "Carcharhinus leucas") %>%
  dplyr::filter(Region %in% c("W-IO", "N-IO", "E-IO", "E-IO/W-PAC", "W-PAC",
                              "Japan", "Fiji"))

readr::write_tsv(strata, path = "Bull_shark_DArTcap_strata5_IWP.tsv")
```

### 11.2 Filter data

1. Marker Reproducibility: 0.98
2. Individual missingness: 0.25
3. Individual Het - low: 0
4. Individual Het - high: 0.07
5. Individual total coverage - low: 10,000
6. Individual total coverage - high: 1,000,000
7. Marker MAC - low: 3
8. Marker coverage - low: 4
9. Marker coverage - high:60
10. Marker maximum missing proportion: 0.1
11. Marker snp position on locus: n
12. Max 2 SNPs per locus
13. 1 SNP per locus according to mac
14. no LD filter
15. Individual Het - low: 0.051
16. Individual Het - high: 0.076
17. Duplicated individuals: 0.2
18. Filter on HWE: 4 pops, 0.001

```
dartcap.data <- "SEQ_SNPs_counts_0_Target_merge.csv"
strata <- "Bull_shark_DArTcap_strata5_IWP.tsv"
BSsnp <- radiator::filter_rad(dartcap.data, strata,
                              parallel.core = 1)
BS.dartcap.IWP.gds <- BSsnp$gds
BS.dartcap.IWP.tidy <- BSsnp$output$tidy.data
print(BS.dartcap.IWP.gds, expand = TRUE, all = TRUE, attribute = TRUE,
      attribute.trim = FALSE)

save(BS.dartcap.IWP.tidy, file = "DArTcap_IWP.Rdata")
```

Table 43:

| FILTERS                                    | VALUES      | BEFORE                       | BLACKLIST                 |
|--------------------------------------------|-------------|------------------------------|---------------------------|
| Filter DArT reproducibility                | 0.98        | 798 / 26 / 1 / 26335 / 37537 | 0 / 0 / 0 / 1043 / 2250   |
| Filter monomorphic markers                 | NA          | 798 / 26 / 1 / 25292 / 35287 | 0 / 0 / 0 / 11939 / 19900 |
| Filter markers in common                   | NA          | 798 / 26 / 1 / 13353 / 15387 | 0 / 0 / 0 / 187 / 224     |
| Filter individuals based on missingness    | 0.25        | 798 / 26 / 1 / 13166 / 15163 | 12 / 0 / 0 / 0 / 0        |
| Filter individuals based on heterozygosity | 0 0.07      | 786 / 26 / 1 / 13166 / 15163 | 9 / 0 / 0 / 0 / 0         |
| Filter individuals based on total coverage | 10000 1e+07 | 777 / 26 / 1 / 13166 / 15163 | 2 / 0 / 0 / 0 / 0         |
| Filter monomorphic markers                 | NA          | 775 / 26 / 1 / 13166 / 15163 | 0 / 0 / 0 / 2030 / 2633   |
| Filter MAC                                 | 3           | 775 / 26 / 1 / 11136 / 12530 | 0 / 0 / 0 / 5456 / 6385   |
| Filter coverage min / max                  | 4-60        | 775 / 26 / 1 / 5680 / 6145   | 0 / 0 / 0 / 1612 / 1695   |
| Filter genotyping                          | 0.1         | 775 / 26 / 1 / 4068 / 4450   | 0 / 0 / 0 / 591 / 640     |
| Filter SNPs position on the read           | all         | 775 / 26 / 1 / 3477 / 3810   | 0 / 0 / 0 / 0 / 0         |
| Filter markers snp number                  | 3           | 775 / 26 / 1 / 3477 / 3810   | 0 / 0 / 0 / 5 / 21        |
| Filter short ld                            | mac         | 775 / 26 / 1 / 3472 / 3789   | 0 / 0 / 0 / 0 / 317       |
| detect mixed genomes                       | 0.051 0.076 | 775 / 26 / 1 / 3472 / 3472   | 71 / 0 / 0 / 0 / 0        |
| Filter monomorphic markers                 | NA          | 704 / 26 / 1 / 3472 / 3472   | 0 / 0 / 0 / 9 / 9         |
| detect duplicate genomes                   | 0.2         | 704 / 26 / 1 / 3463 / 3463   | 68 / 0 / 0 / 0 / 0        |
| Filter monomorphic markers                 | NA          | 636 / 26 / 1 / 3463 / 3463   | 0 / 0 / 0 / 3 / 3         |
| Filter HWE                                 | 40.001      | 636 / 26 / 1 / 3460 / 3460   | 0 / 0 / 0 / 9 / 9         |

### 11.2.1 Remove extra low and high heterozygous individuals

Because the average heterozygosity per sampling location is not even, certain individuals cannot be excluded without removing 'good' individuals.

```
rm <- c("CL-ARS021-F", "CL-GOM025-F.1", "CL-GOM012-F", "CL-SAF014-M", "CL-SAF002-F",
       "CL-BRZ038-U", "CLF003-F", "CL-GOM011-F", "CL-SAF015-F", "CL-SAF003-M",
       "CL-PNG005-U", "CLCRO56-M", "CLCRO47.1", "CLCRO55-M", "CLCRO66-M")

BS.dartcap.IWP.tidy <- BS.dartcap.IWP.tidy[!BS.dartcap.IWP.tidy$INDIVIDUALS %in% rm,]
length(unique(BS.dartcap.IWP.tidy$INDIVIDUALS)) # 635
```

### 11.3 Save data

```
Convert <- radiator::genomic_converter(BS.dartcap.IWP.tidy,
                                       output = c("genlight", "stockr",
                                                  "pcadapt", "gtypes", "rubias"))

BS.dartcap.IWP.gl <- Convert$genlight
BS.dartcap.IWP.stkr <- Convert$stockr
BS.dartcap.IWP.pc <- Convert$pcadapt
BS.dartcap.IWP.gt <- Convert$gtypes
BS.dartcap.IWP.rubias <- Convert$rubias

markers.meta <- radiator::extract_markers_metadata(BS.dartcap.IWP.gds,
                                                  whitelist = TRUE)
individuals.meta <- radiator::extract_individuals_metadata(BS.dartcap.IWP.gds,
                                                         whitelist = TRUE)
individuals.meta <- individuals.meta[individuals.meta$INDIVIDUALS %in%
                                     BS.dartcap.IWP.gl$ind.names,]
BS.dartcap.IWP.gl$other$ind.metrics <- individuals.meta
BS.dartcap.IWP.gl$other$loc.metrics <- markers.meta
BS.dartcap.IWP.gt@schemes <- individuals.meta

pop.levels <- c("South Africa", "Mozambique", "Reunion", "Seychelles",
              "Arabian Sea", "Sri Lanka", "Thailand", "Indonesia",
              "Papua New Guinea", "Fitzroy River", "Daly River",
              "Adelaide River", "Darwin Coastal", "South Alligator River",
              "East Alligator River", "Blue mud Bay", "Roper River",
              "Towns River", "Unknown", "Wenlock River", "Trinity inlet",
              "Clarence River", "Sydney Harbour", "Okinawa", "Urauchi River",
              "Fiji")
BS.dartcap.IWP.gl$pop <- factor(BS.dartcap.IWP.gl$other$ind.metrics$Site2,
                               levels = pop.levels)
BS.dartcap.IWP.gl <- BS.dartcap.IWP.gl[order(BS.dartcap.IWP.gl$pop,
                                             BS.dartcap.IWP.gl$ind.names),]
BS.dartcap.IWP.gl <- BS.dartcap.IWP.gl[order(BS.dartcap.IWP.gl$pop,
                                             BS.dartcap.IWP.gl$ind.names)]
BS.dartcap.IWP.rubias$repunit <- factor(BS.dartcap.IWP.rubias$repunit,
                                       levels = pop.levels)

save(BS.dartcap.IWP.tidy, BS.dartcap.IWP.gl, BS.dartcap.IWP.stkr,
     BS.dartcap.IWP.pc, BS.dartcap.IWP.gt, BS.dartcap.IWP.rubias,
     markers.meta, individuals.meta, file = "DarTcap_IWP.Rdata")
```

## 11.4 Load data

```
load("DARtcap_IWP.Rdata")
pop.levels <- c("South Africa", "Mozambique", "Reunion", "Seychelles",
  "Arabian Sea", "Sri Lanka", "Thailand", "Indonesia",
  "Papua New Guinea", "Fitzroy River", "Daly River",
  "Adelaide River", "Darwin Coastal", "South Alligator River",
  "East Alligator River", "Blue mud Bay", "Roper River",
  "Towns River", "Unknown", "Wenlock River", "Trinity inlet",
  "Clarence River", "Sydney Harbour", "Okinawa", "Urauchi River",
  "Fiji")
BS.dartcap.IWP.gl$pop <- factor(BS.dartcap.IWP.gl$pop, levels = pop.levels)
BS.dartcap.IWP.gl <- BS.dartcap.IWP.gl[order(BS.dartcap.IWP.gl$pop,
  BS.dartcap.IWP.gl$ind.names),]

pop.levels1 <- stringr::str_replace_all(pop.levels, " ", "_")
BS.dartcap.IWP.tidy$POP_ID <- factor(BS.dartcap.IWP.tidy$POP_ID,
  levels = pop.levels1)
BS.dartcap.IWP.tidy <- BS.dartcap.IWP.tidy[order(BS.dartcap.IWP.tidy$POP_ID,
  BS.dartcap.IWP.tidy$INDIVIDUALS),]

adegenet::nInd(BS.dartcap.IWP.gl) # 635
adegenet::nLoc(BS.dartcap.IWP.gl) # 3451
summary(BS.dartcap.IWP.gl$pop)
sum(duplicated(BS.dartcap.IWP.gl$other$ind.metrics$`Genetic code`)) # 0 replicate left
sum(baits$CloneID %in% BS.dartcap.IWP.gl$other$loc.metrics$LOCUS) #74

## [1] 635
## [1] 3451
##           South Africa           Mozambique           Reunion
##                21                11                28
##           Seychelles           Arabian Sea           Sri Lanka
##                36                15                12
##           Thailand           Indonesia           Papua New Guinea
##                4                 4                 9
##           Fitzroy River           Daly River           Adelaide River
##                3                 49                18
##           Darwin Coastal South Alligator River East Alligator River
##                13                88                47
##           Blue mud Bay           Roper River           Towns River
##                17                 9                10
##           Unknown           Wenlock River           Trinity inlet
##                10                24                 4
##           Clarence River           Sydney Harbour           Okinawa
##                74                65                 9
##           Urauchi River           Fiji
##                35                20

## [1] 0
## [1] 74
```

## 11.5 Remove sex-linked markers

```
load("Sex-linked_marker_DARtcap.Rdata")
load("Sex_results.Rdata")
sum(bull_shark$sexy.summary$CLONE_ID %in% SLM$sexy.summary$CLONE_ID) #33
sum(SLM$sexy.summary$CLONE_ID %in% bull_shark$sexy.summary$CLONE_ID) #23
sex.markers <- unique(c(bull_shark$sexy.summary$CLONE_ID,
  SLM$sexy.summary$CLONE_ID))
```

```

sum(BS.dartcap.IWP.gl$loc.names %in% sex.markers) #35
locnames <- BS.dartcap.IWP.gl$loc.names
BS.dartcap.IWP.gl <- BS.dartcap.IWP.gl[,!locnames %in% sex.markers]
BS.dartcap.IWP.gl$other$loc.metrics <- BS.dartcap.IWP.gl$other$loc.metrics[
  !locnames %in% sex.markers,]

sum(sex.markers %in% unique(BS.dartcap.IWP.tidy$LOCUS)) # 35
BS.dartcap.IWP.tidy <- BS.dartcap.IWP.tidy[!BS.dartcap.IWP.tidy$LOCUS %in%
  sex.markers,]

locus.gt <- stringr::str_match(pattern = "__\\s*(.*?)\\s*__",
  string = BS.dartcap.IWP.gt@data$locus)[,2]
BS.dartcap.IWP.gt <- BS.dartcap.IWP.gt[,!locus.gt %in% sex.markers, ,
  drop = TRUE]

locus.rubias <- stringr::str_match(pattern = "__\\s*(.*?)\\s*__",
  string = colnames(BS.dartcap.IWP.rubias))[,2]
BS.dartcap.IWP.rubias <- BS.dartcap.IWP.rubias[,!locus.rubias %in% sex.markers]

## [1] 33
## [1] 23
## [1] 35
## [1] 35

```

## 11.6 Genetic diversity

```

set.seed(124)
pop.levels <- c( "South Africa", "Mozambique", "Reunion", "Seychelles",
  "Arabian Sea", "Sri Lanka", "Thailand", "Indonesia",
  "Papua New Guinea" , "Fitzroy River", "Daly River", "Adelaide River",
  "Darwin Coastal", "South Alligator River", "East Alligator River",
  "Blue mud Bay", "Roper River", "Town's River", "Unknown",
  "Wenlock River", "Trinity inlet", "Clarence River", "Sydney Harbour",
  "Okinawa", "Urauchi River", "Fiji")

gl <- BS.dartcap.IWP.gl
gl$pop <- factor(gl$other$ind.metrics$Site2, levels = pop.levels)
gl <- gl[order(gl$pop,gl$ind.names)]

gl2gpop(gl, filename = "BS_dartcap_IWP_genepop.txt")
bastat <- diveRsimy::basicStats(infile = "BS_dartcap_IWP_genepop.txt",
  outfile = "BS_dartcap_IWP_BasicStat_output.txt",
  fis_ci = TRUE,ar_ci = TRUE, fis_boots = 1000,
  ar_boots = 1000,mc_reps = 1000,
  rarefaction = FALSE, ar_alpha = 0.05,
  fis_alpha = 0.05)

length(bastat$main_tab) #26
gendiv <- data.frame(
  "South Africa" = bastat$main_tab[[1]]$overall,
  "Mozambique" = bastat$main_tab[[2]]$overall,
  "Reunion" = bastat$main_tab[[3]]$overall,
  "Seychelles" = bastat$main_tab[[4]]$overall,
  "Arabian Sea" = bastat$main_tab[[5]]$overall,
  "Sri Lanka" = bastat$main_tab[[6]]$overall,

```

```

"Thailand" = bastat$main_tab[[7]]$overall,
"Indonesia" = bastat$main_tab[[8]]$overall,
"Papua New Guinea" = bastat$main_tab[[9]]$overall,
"Fitzroy River" = bastat$main_tab[[10]]$overall,
"Daly River" = bastat$main_tab[[11]]$overall,
"Adelaide River" = bastat$main_tab[[12]]$overall,
"Darwin Coastal" = bastat$main_tab[[13]]$overall,
"South Alligator River" = bastat$main_tab[[14]]$overall,
"East Alligator River" = bastat$main_tab[[15]]$overall,
"Blue mud Bay" = bastat$main_tab[[16]]$overall,
"Roper River" = bastat$main_tab[[17]]$overall,
"Townsville River" = bastat$main_tab[[18]]$overall,
"Unknown" = bastat$main_tab[[19]]$overall,
"Wenlock River" = bastat$main_tab[[20]]$overall,
"Trinity Inlet" = bastat$main_tab[[21]]$overall,
"Clarence River" = bastat$main_tab[[22]]$overall,
"Sydney Harbour" = bastat$main_tab[[23]]$overall,
"Urauchi River" = bastat$main_tab[[24]]$overall,
"Okinawa" = bastat$main_tab[[25]]$overall,
"Fiji" = bastat$main_tab[[26]]$overall,
check.names = FALSE)
row.names(gendiv) <- rownames(bastat$main_tab[[1]])

df <- as.data.frame(g1)
df[df == "0"] <- "11"
df[df == "1"] <- "12"
df[df == "2"] <- "22"
gen.gi <- adegenet::df2genind(df, ploidy = 2, ncode = 2, pop = g1$pop)
ris_basic <- hierfstat::basic.stats(gen.gi)
fis.hierfstat <- apply(ris_basic$Fis, 2, mean, na.rm=T)
fis.CI <- hierfstat::boot.ppfis(gen.gi, nboot = 1000, quant = c(0.025,0.975),
                             diploid = TRUE,dig = 4)
df <- data.frame(fis.hierfstat,fis.CI.low = fis.CI$fis.ci[,1],
                fis.CI.high = fis.CI$fis.ci[,2])
df <- as.data.frame(t(df))
gendiv <- rbind(gendiv, df)

readr::write_tsv(gendiv, path = "DarTcap_IWP_gendiv.txt")
save(gendiv, file = "DarTcap_IWP_gendiv.Rdata")

load("DarTcap_IWP_gendiv.Rdata")
shortnames <- c("SAF", "MOZ", "RUN", "SEY", "ARS", "SRL", "TAI", "IND", "PNG",
               "FZR", "DAR", "ADR", "DWC", "SAR", "EAR", "BMB", "ROR", "TOR", "UNK",
               "WER", "TRI", "CLR", "SYH", "URR", "OKI", "FIJ")
knitr::kable(gendiv, col.names = shortnames, digits = 4, caption = "") %>%
  kableExtra::kable_styling(full_width = FALSE, font_size = 5,
                             latex_options = c("hold_position")) %>%
  kableExtra::landscape()

```



Table 44:

|               | SAF     | MOZ     | RUN     | SEY     | ARS     | SRL     | TAI     | IND     | PNG     | FZR     | DAR     | ADR     | DWC     | SAR     | EAR     | BMB     | ROR     | TOR     | UNK     | WER     | TRI     |
|---------------|---------|---------|---------|---------|---------|---------|---------|---------|---------|---------|---------|---------|---------|---------|---------|---------|---------|---------|---------|---------|---------|
| ar            | 1.1500  | 1.1290  | 1.1480  | 1.1500  | 1.1540  | 1.1480  | 1.1340  | 1.1230  | 1.1420  | 1.1120  | 1.1540  | 1.1490  | 1.1530  | 1.1530  | 1.1500  | 1.1550  | 1.1390  | 1.1410  | 1.1450  | 1.1530  | 1.1360  |
| size          | 20.7310 | 10.2200 | 27.3360 | 35.4140 | 14.8220 | 11.8720 | 3.9710  | 3.9530  | 8.8880  | 2.9070  | 48.4430 | 17.7910 | 12.8110 | 86.9180 | 46.4840 | 16.7170 | 8.5940  | 9.8000  | 9.7930  | 23.6650 | 3.9430  |
| obs_het       | 0.0610  | 0.0570  | 0.0600  | 0.0610  | 0.0640  | 0.0630  | 0.0660  | 0.0620  | 0.0610  | 0.0610  | 0.0610  | 0.0620  | 0.0640  | 0.0610  | 0.0610  | 0.0660  | 0.0600  | 0.0600  | 0.0630  | 0.0620  | 0.0680  |
| exp_het       | 0.0640  | 0.0620  | 0.0640  | 0.0640  | 0.0650  | 0.0630  | 0.0590  | 0.0550  | 0.0600  | 0.0530  | 0.0650  | 0.0630  | 0.0650  | 0.0640  | 0.0630  | 0.0660  | 0.0630  | 0.0610  | 0.0630  | 0.0650  | 0.0610  |
| uexp_het      | 0.0660  | 0.0660  | 0.0650  | 0.0650  | 0.0670  | 0.0660  | 0.0670  | 0.0630  | 0.0640  | 0.0630  | 0.0650  | 0.0650  | 0.0680  | 0.0650  | 0.0640  | 0.0680  | 0.0670  | 0.0640  | 0.0660  | 0.0660  | 0.0700  |
| fis           | 0.0320  | 0.0540  | 0.0470  | 0.0300  | 0.0100  | -0.0020 | -0.1320 | -0.1330 | -0.0200 | -0.1720 | 0.0390  | 0.0120  | -0.0010 | 0.0360  | 0.0320  | -0.0010 | 0.0180  | -0.0020 | -0.0160 | 0.0290  | -0.1280 |
| hwe_glb       | 1.0000  | 1.0000  | 1.0000  | 1.0000  | 1.0000  | 1.0000  | 1.0000  | 1.0000  | 1.0000  | 1.0000  | 1.0000  | 1.0000  | 1.0000  | 1.0000  | 1.0000  | 1.0000  | 1.0000  | 1.0000  | 1.0000  | 1.0000  | 1.0000  |
| hwe_hom       | 1.0000  | 1.0000  | 1.0000  | 1.0000  | 1.0000  | 1.0000  | 1.0000  | 1.0000  | 1.0000  | 1.0000  | 1.0000  | 1.0000  | 1.0000  | 1.0000  | 1.0000  | 1.0000  | 1.0000  | 1.0000  | 1.0000  | 1.0000  | 1.0000  |
| hwe_het       | 1.0000  | 1.0000  | 1.0000  | 1.0000  | 1.0000  | 1.0000  | 1.0000  | 1.0000  | 1.0000  | 1.0000  | 1.0000  | 1.0000  | 1.0000  | 1.0000  | 1.0000  | 1.0000  | 1.0000  | 1.0000  | 1.0000  | 1.0000  | 1.0000  |
| fis_lo        | -0.0010 | -0.0350 | 0.0140  | 0.0070  | -0.0430 | -0.0750 | -0.3760 | -0.5440 | -0.1190 | -1.0000 | 0.0220  | -0.0290 | -0.0590 | 0.0270  | 0.0140  | -0.0450 | -0.0940 | -0.0840 | -0.0970 | -0.0060 | -0.3810 |
| fis_hi        | 0.0270  | 0.0470  | 0.0440  | 0.0290  | 0.0020  | -0.0120 | -0.1320 | -0.1330 | -0.0290 | -0.1720 | 0.0380  | 0.0060  | -0.0100 | 0.0370  | 0.0300  | -0.0080 | 0.0110  | -0.0100 | -0.0230 | 0.0260  | -0.1280 |
| ar_lo         | 1.1130  | 1.0440  | 1.1110  | 1.1140  | 1.1150  | 1.1120  | 1.0590  | 1.0470  | 1.1120  | 1.0040  | 1.1190  | 1.1120  | 1.1150  | 1.1220  | 1.1140  | 1.1180  | 1.0920  | 1.1040  | 1.1100  | 1.1150  | 1.0520  |
| ar_hi         | 1.1630  | 1.1580  | 1.1600  | 1.1620  | 1.1730  | 1.1720  | 1.1630  | 1.1590  | 1.1590  | 1.1500  | 1.1650  | 1.1640  | 1.1730  | 1.1640  | 1.1620  | 1.1760  | 1.1620  | 1.1610  | 1.1630  | 1.1680  | 1.1680  |
| fis.hierfstat | 0.0554  | 0.0983  | 0.0641  | 0.0433  | 0.0429  | 0.0388  | -0.0044 | -0.0062 | 0.0349  | 0.0007  | 0.0485  | 0.0394  | 0.0368  | 0.0418  | 0.0423  | 0.0283  | 0.0727  | 0.0475  | 0.0338  | 0.0490  | -0.0008 |
| fis.CI.low    | 0.0563  | 0.1030  | 0.0615  | 0.0396  | 0.0329  | 0.0192  | -0.0185 | -0.0232 | 0.0306  | -0.0037 | 0.0487  | 0.0359  | 0.0324  | 0.0410  | 0.0394  | 0.0184  | 0.0741  | 0.0480  | 0.0311  | 0.0496  | -0.0147 |
| fis.CI.high   | 0.0928  | 0.1607  | 0.0973  | 0.0672  | 0.0731  | 0.0668  | 0.0560  | 0.0587  | 0.0789  | 0.0915  | 0.0735  | 0.0718  | 0.0753  | 0.0626  | 0.0669  | 0.0581  | 0.1286  | 0.0990  | 0.0783  | 0.0796  | 0.0589  |

### 11.6.1 Number of monomorphic markers per population

```

pop.levels <- c( "South Africa", "Mozambique", "Reunion", "Seychelles",
                "Arabian Sea", "Sri Lanka", "Thailand", "Indonesia",
                "Papua New Guinea", "Fitzroy River", "Daly River", "Adelaide River",
                "Darwin Coastal", "South Alligator River", "East Alligator River",
                "Blue mud Bay", "Roper River", "Towns River", "Unknown",
                "Wenlock River", "Trinity inlet", "Clarence River", "Sydney Harbour",
                "Urauchi River", "Okinawa", "Fiji")

monomorphics <- c()
for (i in 1:length(pop.levels)) {
  x <- BS.dartcap.IWP.gl[BS.dartcap.IWP.gl$pop == pop.levels[i]]
  x2 <- dartR::gl.filter.monomorphs(x, verbose = 0)
  locs <- adegenet::nLoc(x) - adegenet::nLoc(x2)
  monomorphics[i] <- locs
}
names(monomorphics) <- pop.levels
shortnames <- c("SAF", "MOZ", "RUN", "SEY", "ARS", "SRL", "TAI", "IND", "PNG",
               "FZR", "DAR", "ADR", "DWC", "SAR", "EAR", "BMB", "ROR", "TOR", "UNK",
               "WER", "TRI", "CLR", "SYH", "URR", "OKI", "FIJ")
knitr::kable(t(as.table(monomorphics)), col.names = shortnames, digits = 4,
              caption = "") %>%
  kableExtra::kable_styling(full_width = FALSE, font_size = 5,
                             latex_options = c("hold_position"))

```

Table 45:

| SAF  | MOZ  | RUN  | SEY  | ARS  | SRL  | TAI  | IND  | PNG  | FZR  | DAR  | ADR  | DWC  | SAR  | EAR  | BMB  | ROR  | TOR  | UNK  | WE  |
|------|------|------|------|------|------|------|------|------|------|------|------|------|------|------|------|------|------|------|-----|
| 2050 | 2406 | 1947 | 1837 | 2119 | 2306 | 2773 | 2825 | 2469 | 2919 | 1624 | 2134 | 2231 | 1235 | 1690 | 2087 | 2489 | 2452 | 2415 | 195 |

### 11.6.2 Nucleotide diversity and inbreeding

```

pi.sum <- radiator::pi(
  data = BS.dartcap.IWP.tidy,
  read.length = 70,
  parallel.core = parallel::detectCores() - 1,
  path.folder = NULL,
  verbose = TRUE
)

FIS.sum <- radiator::ibd_g_fh(data = BS.dartcap.IWP.tidy,
                             path.folder = NULL, verbose = TRUE)

save(pi.sum, FIS.sum, file = "DARtcap_IWP_pi_FIS_Sites2.Rdata")

load("DARtcap_IWP_pi_FIS_Sites2.Rdata")
pi.sum$boxplot.pi

```

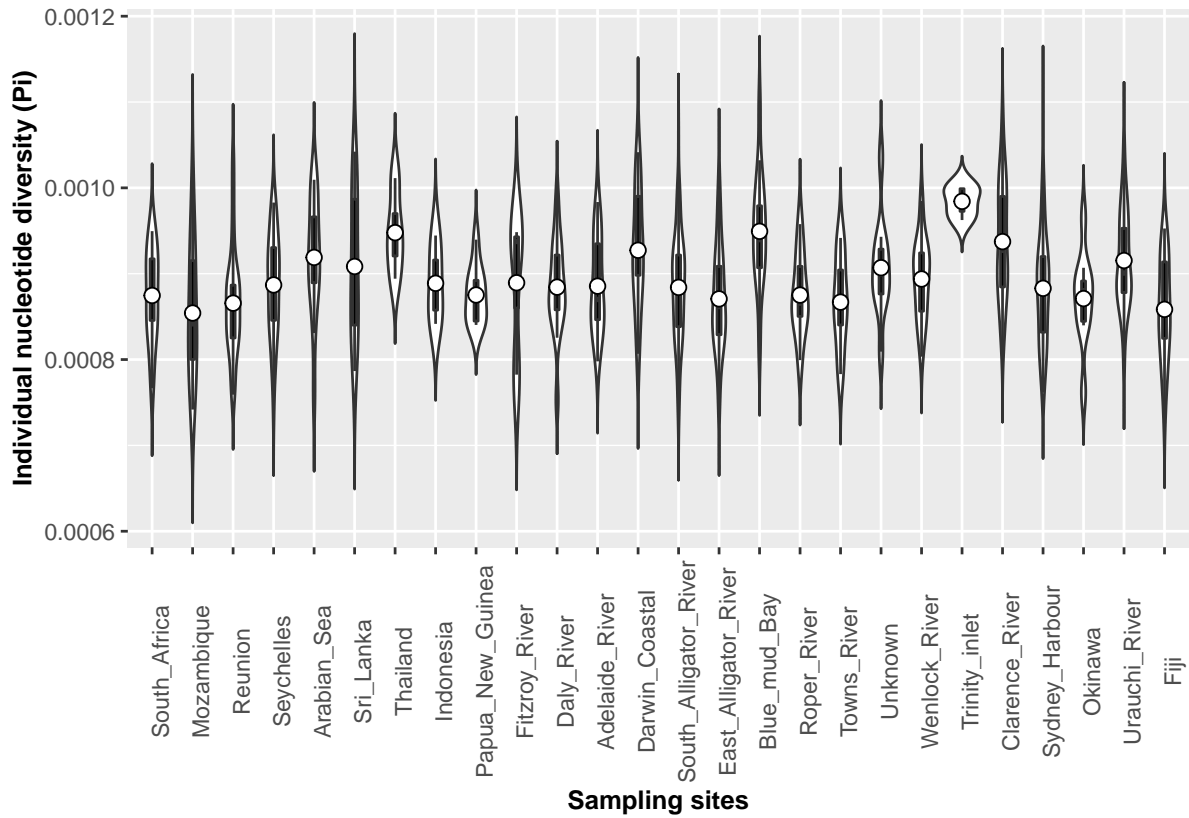

FIS.sum\$fh.box.plot

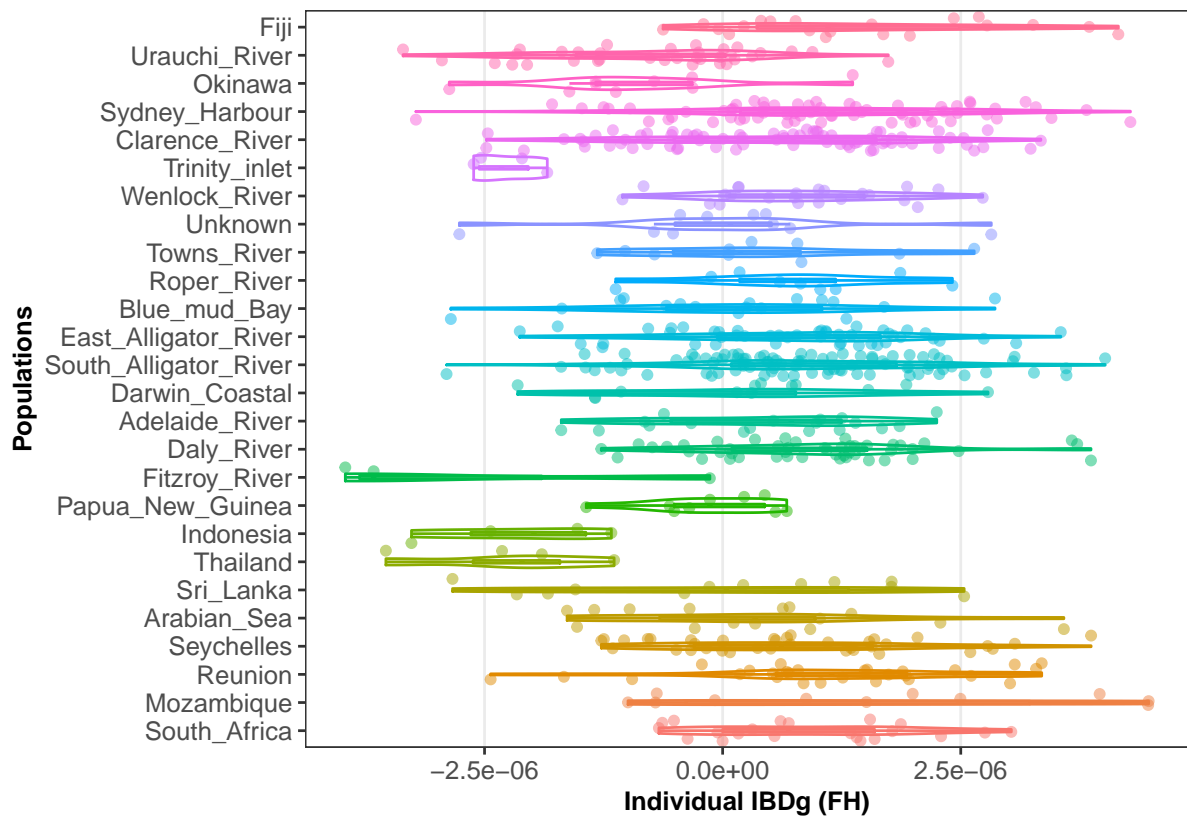

## 11.7 Genetic differentiation

```
Fst.gt <- strataG::popStructTest(
  BS.dartcap.IWP.gt,
  nrep = 1000,
  stats = "all",
  type = "pairwise",
  keep.null = FALSE,
  quietly = TRUE,
  nb.cores = parallel::detectCores() - 1,
  write.output = FALSE
)
save(Fst.gt, file = "DARtcap_IWP_FST.Rdata")
readr::write_tsv(Fst.gt$pairwise$result, path = "DARtcap_IWP_FST.txt")

load("DARtcap_IWP_FST.Rdata")

kableExtra::kbl(Fst.gt$pairwise$result[order(Fst.gt$pairwise$result$Fst,
                                             decreasing = TRUE),
                                             -c(1:4)], digits = 4,
  caption = "Pairwise Fst for 3416 DARtcap loci between the IWP sites",
  longtable = TRUE, booktabs = TRUE) %>%
  kableExtra::kable_styling(full_width = FALSE, font_size = 5,
    latex_options = c("repeat_header", "hold_position")) %>%
  kableExtra::landscape()
```

Table 46: Pairwise Fst for 3416 DARtCap loci between the IWP sites

|                                                  | Chi2      | Chi2.p.val | D     | D.p.val | Fis      | Fis.p.val | Fst    | Fst.p.val | F'st   | F'st.p.val | Gst    | Gst.p.val | G'st   | G'st.p.val | G''st  | G''st.p.val |
|--------------------------------------------------|-----------|------------|-------|---------|----------|-----------|--------|-----------|--------|------------|--------|-----------|--------|------------|--------|-------------|
| Fiji (20) v. Urauchi_River (35)                  | 5388.4074 | 0.0010     | 4e-04 | 0.0010  | -9.0446  | 1.0000    | 0.0760 | 0.0010    | 0.0825 | 0.0010     | 0.1261 | 0.0010    | 0.1402 | 0.0010     | 0.2364 | 0.0010      |
| Indonesia (4) v. Urauchi_River (35)              | 2993.2512 | 0.0010     | 4e-04 | 0.0010  | -41.5699 | 0.5787    | 0.0637 | 0.0020    | 0.0695 | 0.0021     | 0.6333 | 0.1502    | 0.6525 | 0.1439     | 0.7872 | 0.1439      |
| Fiji (20) v. Okinawa (9)                         | 2794.0827 | 0.0010     | 3e-04 | 0.0010  | -16.3836 | 0.9990    | 0.0586 | 0.0010    | 0.0631 | 0.0010     | 0.3143 | 0.0010    | 0.3143 | 0.0010     | 0.4694 | 0.0010      |
| Okinawa (9) v. Urauchi_River (35)                | 3217.6843 | 0.0010     | 3e-04 | 0.0010  | -14.4384 | 0.9920    | 0.0586 | 0.0010    | 0.0638 | 0.0010     | 0.2391 | 0.0010    | 0.2590 | 0.0010     | 0.4020 | 0.0010      |
| Towns_River (10) v. Urauchi_River (35)           | 3526.7775 | 0.0010     | 3e-04 | 0.0010  | -12.3740 | 0.9271    | 0.0543 | 0.0010    | 0.0591 | 0.0010     | 0.2009 | 0.0010    | 0.2195 | 0.0010     | 0.3501 | 0.0010      |
| Trinity_inlet (4) v. Urauchi_River (35)          | 3102.3571 | 0.0010     | 3e-04 | 0.0060  | -34.4901 | 0.0312    | 0.0535 | 0.0041    | 0.0585 | 0.0042     | 0.5876 | 0.7031    | 0.6090 | 0.6562     | 0.7537 | 0.6667      |
| Blue_mud_Bay (17) v. Urauchi_River (35)          | 4357.8966 | 0.0010     | 3e-04 | 0.0010  | -8.8342  | 0.9530    | 0.0520 | 0.0010    | 0.0566 | 0.0010     | 0.1175 | 0.0010    | 0.1309 | 0.0010     | 0.2223 | 0.0010      |
| Thailand (4) v. Urauchi_River (35)               | 2896.9249 | 0.0010     | 3e-04 | 0.0030  | -34.7092 | 0.0402    | 0.0510 | 0.0020    | 0.0557 | 0.0011     | 0.5847 | 0.7799    | 0.6057 | 0.7619     | 0.7512 | 0.7672      |
| Roper_River (9) v. Urauchi_River (35)            | 3338.2073 | 0.0010     | 3e-04 | 0.0010  | -13.0815 | 0.6304    | 0.0496 | 0.0010    | 0.0541 | 0.0010     | 0.2235 | 0.0010    | 0.2434 | 0.0010     | 0.3816 | 0.0010      |
| Reunion (28) v. Urauchi_River (35)               | 4762.2518 | 0.0010     | 3e-04 | 0.0010  | -8.1018  | 1.0000    | 0.0494 | 0.0010    | 0.0536 | 0.0010     | 0.0890 | 0.0010    | 0.0995 | 0.0010     | 0.1731 | 0.0010      |
| Papua_New_Guinea (9) v. Urauchi_River (35)       | 3112.8556 | 0.0010     | 2e-04 | 0.0010  | -13.3160 | 0.8492    | 0.0490 | 0.0010    | 0.0534 | 0.0010     | 0.2208 | 0.0010    | 0.2402 | 0.0010     | 0.3776 | 0.0010      |
| Mozambique (11) v. Urauchi_River (35)            | 3474.1127 | 0.0010     | 2e-04 | 0.0010  | -12.0236 | 0.9980    | 0.0490 | 0.0010    | 0.0533 | 0.0010     | 0.1941 | 0.0010    | 0.2124 | 0.0010     | 0.3404 | 0.0010      |
| Darwin_Coastal (13) v. Urauchi_River (35)        | 3713.8639 | 0.0010     | 2e-04 | 0.0010  | -10.0498 | 0.3896    | 0.0467 | 0.0010    | 0.0508 | 0.0010     | 0.1448 | 0.0010    | 0.1603 | 0.0010     | 0.2666 | 0.0010      |
| South_Africa (21) v. Urauchi_River (35)          | 4127.6671 | 0.0010     | 3e-04 | 0.0010  | -8.7052  | 1.0000    | 0.0463 | 0.0010    | 0.0502 | 0.0010     | 0.1027 | 0.0010    | 0.1145 | 0.0010     | 0.1970 | 0.0010      |
| Sri_Lanka (12) v. Urauchi_River (35)             | 3514.0811 | 0.0010     | 2e-04 | 0.0010  | -10.8402 | 0.6384    | 0.0456 | 0.0010    | 0.0496 | 0.0010     | 0.1592 | 0.0020    | 0.1754 | 0.0010     | 0.2887 | 0.0010      |
| Adelaide_River (18) v. Urauchi_River (35)        | 3899.2966 | 0.0010     | 2e-04 | 0.0010  | -9.3785  | 1.0000    | 0.0449 | 0.0010    | 0.0488 | 0.0010     | 0.1156 | 0.0010    | 0.1285 | 0.0010     | 0.2188 | 0.0010      |
| Unknown (10) v. Urauchi_River (35)               | 3357.2812 | 0.0010     | 2e-04 | 0.0010  | -12.1235 | 0.5524    | 0.0442 | 0.0010    | 0.0481 | 0.0010     | 0.1929 | 0.0020    | 0.2111 | 0.0020     | 0.3387 | 0.0020      |
| Daly_River (49) v. Urauchi_River (35)            | 5465.3608 | 0.0010     | 2e-04 | 0.0010  | -6.6411  | 1.0000    | 0.0440 | 0.0010    | 0.0476 | 0.0010     | 0.0631 | 0.0010    | 0.0710 | 0.0010     | 0.1261 | 0.0010      |
| Sydney_Harbour (65) v. Urauchi_River (35)        | 5957.1169 | 0.0010     | 2e-04 | 0.0010  | -5.9518  | 1.0000    | 0.0433 | 0.0010    | 0.0467 | 0.0010     | 0.0552 | 0.0010    | 0.0622 | 0.0010     | 0.1112 | 0.0010      |
| Arabian_Sea (15) v. Urauchi_River (35)           | 3856.4156 | 0.0010     | 2e-04 | 0.0010  | -9.3106  | 0.6993    | 0.0431 | 0.0010    | 0.0469 | 0.0010     | 0.1249 | 0.0010    | 0.1387 | 0.0010     | 0.2344 | 0.0010      |
| Indonesia (4) v. Okinawa (9)                     | 1478.2974 | 0.0120     | 2e-04 | 0.0639  | 43.3210  | 0.7992    | 0.0431 | 0.0291    | 0.0467 | 0.0293     | 1.7858 | 0.3486    | 1.7220 | 0.3649     | 1.2592 | 0.3670      |
| Blue_mud_Bay (17) v. Fiji (20)                   | 3330.6963 | 0.0010     | 2e-04 | 0.0010  | -9.5476  | 1.0000    | 0.0426 | 0.0010    | 0.0477 | 0.0010     | 0.1449 | 0.0010    | 0.1608 | 0.0010     | 0.2670 | 0.0010      |
| Clarence_River (74) v. Urauchi_River (35)        | 6255.5369 | 0.0010     | 2e-04 | 0.0010  | -4.9884  | 1.0000    | 0.0418 | 0.0010    | 0.0452 | 0.0010     | 0.0482 | 0.0010    | 0.0545 | 0.0010     | 0.0980 | 0.0010      |
| Seychelles (36) v. Urauchi_River (35)            | 4708.7080 | 0.0010     | 2e-04 | 0.0010  | -7.6307  | 1.0000    | 0.0417 | 0.0010    | 0.0452 | 0.0010     | 0.0742 | 0.0010    | 0.0832 | 0.0010     | 0.1465 | 0.0010      |
| East_Alligator_River (47) v. Urauchi_River (35)  | 5161.3271 | 0.0010     | 2e-04 | 0.0010  | -6.9864  | 1.0000    | 0.0416 | 0.0010    | 0.0450 | 0.0010     | 0.0644 | 0.0010    | 0.0723 | 0.0010     | 0.1284 | 0.0010      |
| Urauchi_River (35) v. Wenlock_River (24)         | 4244.2007 | 0.0010     | 2e-04 | 0.0010  | -8.1753  | 1.0000    | 0.0410 | 0.0010    | 0.0443 | 0.0010     | 0.0902 | 0.0010    | 0.1008 | 0.0010     | 0.1753 | 0.0010      |
| South_Alligator_River (88) v. Urauchi_River (35) | 6536.0386 | 0.0010     | 2e-04 | 0.0010  | -4.9996  | 1.0000    | 0.0408 | 0.0010    | 0.0439 | 0.0010     | 0.0463 | 0.0010    | 0.0522 | 0.0010     | 0.0942 | 0.0010      |
| Okinawa (9) v. Towns_River (10)                  | 1928.3144 | 0.0010     | 2e-04 | 0.0020  | -28.1073 | 1.0000    | 0.0407 | 0.0010    | 0.0443 | 0.0010     | 0.4626 | 0.0010    | 0.4853 | 0.0010     | 0.6481 | 0.0010      |
| Okinawa (9) v. Trinity_inlet (4)                 | 1562.9446 | 0.0130     | 2e-04 | 0.0470  | 54.7396  | 0.5153    | 0.0394 | 0.0291    | 0.0424 | 0.0291     | 1.5314 | 0.7249    | 1.4886 | 0.7372     | 1.1930 | 0.7382      |
| Fiji (20) v. Trinity_inlet (4)                   | 2323.4592 | 0.0010     | 3e-04 | 0.0050  | -52.4566 | 0.0322    | 0.0384 | 0.0073    | 0.0412 | 0.0073     | 0.7000 | 0.9236    | 0.7174 | 0.9236     | 0.8338 | 0.9236      |
| Okinawa (9) v. Thailand (4)                      | 1509.6999 | 0.0180     | 2e-04 | 0.0639  | 53.8887  | 0.4297    | 0.0381 | 0.0330    | 0.0408 | 0.0330     | 1.5562 | 0.7745    | 1.5120 | 0.7867     | 1.2003 | 0.7887      |
| Fiji (20) v. Towns_River (10)                    | 2620.1691 | 0.0010     | 2e-04 | 0.0010  | -13.9361 | 0.9830    | 0.0374 | 0.0010    | 0.0406 | 0.0010     | 0.2406 | 0.0010    | 0.2612 | 0.0010     | 0.4045 | 0.0010      |
| Fiji (20) v. Indonesia (4)                       | 2161.3683 | 0.0010     | 2e-04 | 0.0080  | -71.6720 | 0.2780    | 0.0374 | 0.0042    | 0.0401 | 0.0052     | 0.7598 | 0.6916    | 0.7737 | 0.6857     | 0.8714 | 0.6857      |
| Fitzroy_River (3) v. Okinawa (9)                 | 1350.3746 | 0.0440     | 2e-04 | 0.0879  | NA       | NA        | 0.0367 | 0.0832    | NA     | NA         | NA     | NA        | NA     | NA         | NA     | NA          |
| Fiji (20) v. Papua_New_Guinea (9)                | 2482.7329 | 0.0010     | 2e-04 | 0.0010  | -14.8453 | 0.9580    | 0.0360 | 0.0010    | 0.0387 | 0.0010     | 0.2628 | 0.0020    | 0.2841 | 0.0020     | 0.4331 | 0.0020      |
| Fiji (20) v. Mozambique (11)                     | 2692.3627 | 0.0010     | 2e-04 | 0.0010  | -13.5223 | 0.9980    | 0.0357 | 0.0010    | 0.0399 | 0.0010     | 0.2359 | 0.0010    | 0.2565 | 0.0010     | 0.3984 | 0.0010      |
| Okinawa (9) v. Papua_New_Guinea (9)              | 1733.6778 | 0.0050     | 2e-04 | 0.0110  | -33.1632 | 0.9940    | 0.0352 | 0.0090    | 0.0380 | 0.0090     | 0.5126 | 0.0090    | 0.5344 | 0.0090     | 0.6922 | 0.0090      |
| Fiji (20) v. Wenlock_River (24)                  | 3382.0143 | 0.0010     | 2e-04 | 0.0010  | -8.7077  | 1.0000    | 0.0352 | 0.0010    | 0.0383 | 0.0010     | 0.1156 | 0.0010    | 0.1287 | 0.0010     | 0.2190 | 0.0010      |
| Fiji (20) v. Reunion (28)                        | 3540.6320 | 0.0010     | 2e-04 | 0.0010  | -8.6755  | 1.0000    | 0.0350 | 0.0010    | 0.0385 | 0.0010     | 0.1099 | 0.0010    | 0.1224 | 0.0010     | 0.2093 | 0.0010      |
| Fiji (20) v. Sri_Lanka (12)                      | 2768.2168 | 0.0010     | 2e-04 | 0.0010  | -11.6935 | 0.9970    | 0.0340 | 0.0010    | 0.0367 | 0.0010     | 0.1909 | 0.0010    | 0.2092 | 0.0010     | 0.3360 | 0.0010      |
| Blue_mud_Bay (17) v. Okinawa (9)                 | 2200.2988 | 0.0010     | 2e-04 | 0.0010  | -15.2999 | 1.0000    | 0.0339 | 0.0010    | 0.0365 | 0.0010     | 0.2746 | 0.0010    | 0.2964 | 0.0010     | 0.4480 | 0.0010      |
| Mozambique (11) v. Okinawa (9)                   | 1914.0960 | 0.0020     | 2e-04 | 0.0020  | -26.0982 | 0.9960    | 0.0336 | 0.0020    | 0.0363 | 0.0020     | 0.4425 | 0.0030    | 0.4655 | 0.0030     | 0.6294 | 0.0030      |
| Fiji (20) v. South_Alligator_River (88)          | 5324.9691 | 0.0010     | 2e-04 | 0.0010  | -4.9823  | 0.9980    | 0.0336 | 0.0010    | 0.0366 | 0.0010     | 0.0572 | 0.0010    | 0.0644 | 0.0010     | 0.1150 | 0.0010      |
| Adelaide_River (18) v. Fiji (20)                 | 3045.6429 | 0.0010     | 2e-04 | 0.0010  | -9.9690  | 1.0000    | 0.0333 | 0.0010    | 0.0372 | 0.0010     | 0.1412 | 0.0010    | 0.1562 | 0.0010     | 0.2606 | 0.0010      |
| Fiji (20) v. Unknown (10)                        | 2556.4398 | 0.0010     | 2e-04 | 0.0010  | -13.5310 | 0.9291    | 0.0329 | 0.0010    | 0.0357 | 0.0010     | 0.2335 | 0.0010    | 0.2539 | 0.0010     | 0.3952 | 0.0010      |
| Daly_River (49) v. Fiji (20)                     | 4192.4120 | 0.0010     | 2e-04 | 0.0010  | -6.7568  | 1.0000    | 0.0328 | 0.0010    | 0.0359 | 0.0010     | 0.0775 | 0.0010    | 0.0869 | 0.0010     | 0.1526 | 0.0010      |
| Fiji (20) v. South_Africa (21)                   | 3137.9922 | 0.0010     | 2e-04 | 0.0010  | -9.3698  | 1.0000    | 0.0328 | 0.0010    | 0.0355 | 0.0010     | 0.1267 | 0.0010    | 0.1407 | 0.0010     | 0.2373 | 0.0010      |
| Fiji (20) v. Sydney_Harbour (65)                 | 4716.2588 | 0.0010     | 1e-04 | 0.0010  | -5.9569  | 1.0000    | 0.0327 | 0.0010    | 0.0358 | 0.0010     | 0.0672 | 0.0010    | 0.0755 | 0.0010     | 0.1337 | 0.0010      |
| Fiji (20) v. Seychelles (36)                     | 3775.7483 | 0.0010     | 2e-04 | 0.0010  | -7.9274  | 1.0000    | 0.0327 | 0.0010    | 0.0357 | 0.0010     | 0.0939 | 0.0010    | 0.1050 | 0.0010     | 0.1818 | 0.0010      |
| Darwin_Coastal (13) v. Fiji (20)                 | 2818.4246 | 0.0010     | 2e-04 | 0.0010  | -10.9110 | 0.9920    | 0.0324 | 0.0010    | 0.0365 | 0.0010     | 0.1742 | 0.0010    | 0.1918 | 0.0010     | 0.3117 | 0.0010      |
| East_Alligator_River (47) v. Fiji (20)           | 4146.6801 | 0.0010     | 2e-04 | 0.0010  | -7.1477  | 1.0000    | 0.0317 | 0.0010    | 0.0347 | 0.0010     | 0.0806 | 0.0010    | 0.0902 | 0.0010     | 0.1581 | 0.0010      |
| Okinawa (9) v. Wenlock_River (24)                | 2354.3461 | 0.0010     | 2e-04 | 0.0010  | -13.1658 | 1.0000    | 0.0311 | 0.0010    | 0.0340 | 0.0010     | 0.2274 | 0.0010    | 0.2470 | 0.0010     | 0.3865 | 0.0010      |
| Clarence_River (74) v. Fiji (20)                 | 4865.4235 | 0.0010     | 2e-04 | 0.0010  | -4.8476  | 1.0000    | 0.0303 | 0.0010    | 0.0331 | 0.0010     | 0.0560 | 0.0010    | 0.0633 | 0.0010     | 0.1130 | 0.0010      |

Table 46: Pairwise Fst for 3416 DArTcap loci between the IWP sites (continued)

|                                                 | Chi2      | Chi2.p.val | D     | D.p.val | Fis      | Fis.p.val | Fst    | Fst.p.val | F'st   | F'st.p.val | Gst     | Gst.p.val | G'st    | G'st.p.val | G''st  | G''st.p.val |
|-------------------------------------------------|-----------|------------|-------|---------|----------|-----------|--------|-----------|--------|------------|---------|-----------|---------|------------|--------|-------------|
| Okinawa (9) v. Reunion (28)                     | 2426.4054 | 0.0010     | 2e-04 | 0.0010  | -13.1817 | 0.9990    | 0.0301 | 0.0010    | 0.0333 | 0.0010     | 0.2207  | 0.0010    | 0.2398  | 0.0010     | 0.3772 | 0.0010      |
| Okinawa (9) v. Roper_River (9)                  | 1739.1946 | 0.0050     | 2e-04 | 0.0110  | -32.2964 | 0.9940    | 0.0301 | 0.0090    | 0.0337 | 0.0070     | 0.5102  | 0.0060    | 0.5324  | 0.0070     | 0.6904 | 0.0070      |
| Fiji (20) v. Roper_River (9)                    | 2421.4187 | 0.0010     | 2e-04 | 0.0010  | -14.8553 | 0.7992    | 0.0296 | 0.0010    | 0.0326 | 0.0010     | 0.2658  | 0.0100    | 0.2875  | 0.0080     | 0.4371 | 0.0090      |
| Okinawa (9) v. Unknown (10)                     | 1764.3354 | 0.0010     | 2e-04 | 0.0040  | -27.2677 | 0.9970    | 0.0290 | 0.0040    | 0.0316 | 0.0040     | 0.4507  | 0.0040    | 0.4735  | 0.0040     | 0.6371 | 0.0040      |
| Adelaide_River (18) v. Okinawa (9)              | 2070.0534 | 0.0010     | 1e-04 | 0.0010  | -16.4720 | 0.9990    | 0.0290 | 0.0010    | 0.0312 | 0.0010     | 0.2821  | 0.0010    | 0.3034  | 0.0010     | 0.4567 | 0.0010      |
| Clarence_River (74) v. Okinawa (9)              | 3208.9096 | 0.0010     | 2e-04 | 0.0010  | -6.6401  | 1.0000    | 0.0280 | 0.0010    | 0.0301 | 0.0010     | 0.1141  | 0.0010    | 0.1268  | 0.0010     | 0.2162 | 0.0010      |
| Arabian_Sea (15) v. Fiji (20)                   | 2920.1431 | 0.0010     | 2e-04 | 0.0010  | -9.7938  | 1.0000    | 0.0280 | 0.0010    | 0.0314 | 0.0010     | 0.1479  | 0.0010    | 0.1636  | 0.0010     | 0.2713 | 0.0010      |
| Arabian_Sea (15) v. Okinawa (9)                 | 1982.5267 | 0.0010     | 2e-04 | 0.0010  | -16.6438 | 1.0000    | 0.0278 | 0.0010    | 0.0300 | 0.0010     | 0.2970  | 0.0010    | 0.3191  | 0.0010     | 0.4750 | 0.0010      |
| Okinawa (9) v. Sri_Lanka (12)                   | 1865.0523 | 0.0020     | 2e-04 | 0.0050  | -21.3791 | 0.9990    | 0.0278 | 0.0040    | 0.0300 | 0.0040     | 0.3704  | 0.0030    | 0.3933  | 0.0030     | 0.5573 | 0.0030      |
| Okinawa (9) v. South_Alligator_River (88)       | 3295.2727 | 0.0010     | 2e-04 | 0.0010  | -6.8669  | 1.0000    | 0.0272 | 0.0010    | 0.0297 | 0.0010     | 0.1149  | 0.0010    | 0.1274  | 0.0010     | 0.2173 | 0.0010      |
| East_Alligator_River (47) v. Okinawa (9)        | 2729.5616 | 0.0010     | 1e-04 | 0.0010  | -10.4814 | 1.0000    | 0.0271 | 0.0010    | 0.0290 | 0.0010     | 0.1693  | 0.0010    | 0.1855  | 0.0010     | 0.3034 | 0.0010      |
| Daly_River (49) v. Okinawa (9)                  | 2787.1429 | 0.0010     | 1e-04 | 0.0010  | -9.7344  | 1.0000    | 0.0263 | 0.0010    | 0.0283 | 0.0010     | 0.1591  | 0.0010    | 0.1749  | 0.0010     | 0.2881 | 0.0010      |
| Okinawa (9) v. Sydney_Harbour (65)              | 2961.6580 | 0.0010     | 2e-04 | 0.0010  | -8.4520  | 1.0000    | 0.0261 | 0.0010    | 0.0287 | 0.0010     | 0.1383  | 0.0010    | 0.1526  | 0.0010     | 0.2555 | 0.0010      |
| Okinawa (9) v. Seychelles (36)                  | 2430.2545 | 0.0010     | 2e-04 | 0.0010  | -11.9599 | 1.0000    | 0.0257 | 0.0010    | 0.0281 | 0.0010     | 0.1942  | 0.0010    | 0.2119  | 0.0010     | 0.3400 | 0.0010      |
| Darwin_Coastal (13) v. Okinawa (9)              | 1888.3229 | 0.0020     | 2e-04 | 0.0040  | -18.9395 | 1.0000    | 0.0255 | 0.0030    | 0.0276 | 0.0030     | 0.3355  | 0.0010    | 0.3584  | 0.0010     | 0.5196 | 0.0010      |
| Fiji (20) v. Thailand (4)                       | 2116.3784 | 0.0010     | 2e-04 | 0.0130  | -52.7453 | 0.0182    | 0.0243 | 0.0187    | 0.0261 | 0.0187     | 0.6943  | 0.9720    | 0.7114  | 0.9708     | 0.8297 | 0.9708      |
| Fitzroy_River (3) v. Indonesia (4)              | 1013.2851 | 0.2817     | 2e-04 | 0.3157  | NA       | NA        | 0.0242 | 0.2817    | 0.0262 | 0.3047     | NA      | NA        | NA      | NA         | NA     | NA          |
| Okinawa (9) v. South_Africa (21)                | 2060.9975 | 0.0010     | 1e-04 | 0.0010  | -14.8221 | 1.0000    | 0.0240 | 0.0010    | 0.0261 | 0.0010     | 0.2509  | 0.0010    | 0.2712  | 0.0010     | 0.4173 | 0.0010      |
| Fiji (20) v. Fitzroy_River (3)                  | 1990.0145 | 0.0060     | 2e-04 | 0.0160  | NA       | NA        | 0.0235 | 0.0134    | 0.0253 | 0.0134     | NA      | NA        | NA      | NA         | NA     | NA          |
| Indonesia (4) v. Towns_River (10)               | 1433.2349 | 0.0549     | 2e-04 | 0.1019  | 78.7206  | 0.6112    | 0.0219 | 0.0680    | 0.0241 | 0.0680     | 1.3369  | 0.4028    | 1.3120  | 0.4028     | 1.1335 | 0.4028      |
| Papua_New_Guinea (9) v. Trinity_inlet (4)       | 1435.1476 | 0.0020     | 1e-04 | 0.0509  | 81.0946  | 0.2884    | 0.0189 | 0.0040    | 0.0204 | 0.0040     | 1.3103  | 0.8281    | 1.2867  | 0.8342     | 1.1241 | 0.8342      |
| Blue_mud_Bay (17) v. Towns_River (10)           | 1991.2789 | 0.0120     | 1e-04 | 0.0110  | -13.2927 | 0.9990    | 0.0151 | 0.0090    | 0.0165 | 0.0090     | 0.2020  | 0.0020    | 0.2492  | 0.0020     | 0.3891 | 0.0020      |
| Blue_mud_Bay (17) v. Indonesia (4)              | 1621.5721 | 0.2178     | 1e-04 | 0.0899  | -53.8364 | 0.9329    | 0.0149 | 0.0661    | 0.0161 | 0.0661     | 0.7026  | 0.0855    | 0.7192  | 0.0865     | 0.8351 | 0.0865      |
| Indonesia (4) v. Papua_New_Guinea (9)           | 1301.8746 | 0.1199     | 2e-04 | 0.1149  | 56.8305  | 0.8128    | 0.0146 | 0.1269    | 0.0159 | 0.1269     | 1.5187  | 0.2212    | 1.4790  | 0.2232     | 1.1902 | 0.2232      |
| Adelaide_River (18) v. Indonesia (4)            | 1593.1398 | 0.0619     | 1e-04 | 0.0300  | -73.8098 | 0.8877    | 0.0146 | 0.0300    | 0.0157 | 0.0300     | 0.7615  | 0.0772    | 0.7750  | 0.0752     | 0.8723 | 0.0752      |
| Indonesia (4) v. Thailand (4)                   | 1073.1255 | 0.3027     | 2e-04 | 0.3347  | 14.2870  | 0.6334    | 0.0136 | 0.3926    | 0.0147 | 0.3926     | 21.5582 | 0.3387    | 19.1145 | 0.3387     | 1.8030 | 0.3786      |
| Mozambique (11) v. Papua_New_Guinea (9)         | 1581.5293 | 0.0040     | 1e-04 | 0.1429  | -23.7994 | 0.9151    | 0.0135 | 0.0010    | 0.0146 | 0.0010     | 0.4123  | 0.0509    | 0.4355  | 0.0480     | 0.6003 | 0.0470      |
| Blue_mud_Bay (17) v. Reunion (28)               | 2620.0231 | 0.0010     | 1e-04 | 0.0010  | -8.5001  | 0.5764    | 0.0132 | 0.0010    | 0.0146 | 0.0010     | 0.1029  | 0.0010    | 0.1149  | 0.0010     | 0.1975 | 0.0010      |
| Reunion (28) v. Towns_River (10)                | 2203.4878 | 0.0010     | 1e-04 | 0.0010  | -11.8453 | 0.9011    | 0.0129 | 0.0010    | 0.0139 | 0.0010     | 0.1845  | 0.0070    | 0.2019  | 0.0060     | 0.3262 | 0.0060      |
| Reunion (28) v. Trinity_inlet (4)               | 2044.6432 | 0.0040     | 1e-04 | 0.0390  | -29.1164 | 0.0226    | 0.0121 | 0.0462    | 0.0130 | 0.0462     | 0.5424  | 0.9126    | 0.5647  | 0.9074     | 0.7178 | 0.9074      |
| Indonesia (4) v. Seychelles (36)                | 2027.1014 | 0.0180     | 1e-04 | 0.0559  | -26.0019 | 0.7127    | 0.0119 | 0.0250    | 0.0131 | 0.0250     | 0.5045  | 0.2550    | 0.5265  | 0.2540     | 0.6853 | 0.2540      |
| Indonesia (4) v. South_Alligator_River (88)     | 2787.3675 | 0.0190     | 1e-04 | 0.0340  | -10.2014 | 0.7748    | 0.0119 | 0.0142    | 0.0130 | 0.0143     | 0.2747  | 0.0931    | 0.2957  | 0.0839     | 0.4474 | 0.0870      |
| Indonesia (4) v. Trinity_inlet (4)              | 1088.9811 | 0.3497     | 2e-04 | 0.3457  | 14.3096  | 0.6786    | 0.0112 | 0.4336    | 0.0122 | 0.4116     | 17.6351 | 0.2784    | 15.6467 | 0.2784     | 1.7860 | 0.2555      |
| Blue_mud_Bay (17) v. Trinity_inlet (4)          | 1739.6500 | 0.0659     | 1e-04 | 0.1359  | -41.9806 | 0.4728    | 0.0112 | 0.0782    | 0.0121 | 0.0782     | 0.6485  | 0.4441    | 0.6681  | 0.4338     | 0.7987 | 0.4379      |
| Indonesia (4) v. Mozambique (11)                | 1359.9089 | 0.2288     | 2e-04 | 0.1798  | 94.6150  | 0.1131    | 0.0110 | 0.1058    | 0.0128 | 0.0996     | 1.2671  | 0.8907    | 1.2477  | 0.8907     | 1.1093 | 0.8907      |
| Towns_River (10) v. Trinity_inlet (4)           | 1434.7344 | 0.0290     | 1e-04 | 0.2717  | 123.4753 | 0.1840    | 0.0109 | 0.1280    | 0.0118 | 0.1280     | 1.1923  | 0.8643    | 1.1783  | 0.8684     | 1.0813 | 0.8695      |
| Indonesia (4) v. Unknown (10)                   | 1361.0802 | 0.0679     | 1e-04 | 0.1339  | 94.2569  | 0.6197    | 0.0108 | 0.0759    | 0.0119 | 0.0760     | 1.2697  | 0.3823    | 1.2502  | 0.3793     | 1.1102 | 0.3793      |
| Indonesia (4) v. Sydney_Harbour (65)            | 2470.6889 | 0.0050     | 1e-04 | 0.0160  | -13.9163 | 0.7865    | 0.0107 | 0.0070    | 0.0118 | 0.0070     | 0.3433  | 0.1813    | 0.3659  | 0.1843     | 0.5280 | 0.1823      |
| Blue_mud_Bay (17) v. South_Africa (21)          | 2344.0332 | 0.0010     | 1e-04 | 0.0060  | -9.0482  | 0.9880    | 0.0107 | 0.0010    | 0.0117 | 0.0010     | 0.1183  | 0.0010    | 0.1317  | 0.0010     | 0.2235 | 0.0010      |
| Daly_River (49) v. Indonesia (4)                | 2246.8295 | 0.0110     | 1e-04 | 0.0210  | -17.8710 | 0.4845    | 0.0107 | 0.0240    | 0.0114 | 0.0240     | 0.4048  | 0.0954    | 0.4277  | 0.0894     | 0.5926 | 0.0934      |
| Papua_New_Guinea (9) v. Towns_River (10)        | 1505.8548 | 0.0350     | 1e-04 | 0.1039  | -25.4511 | 0.9730    | 0.0106 | 0.0190    | 0.0116 | 0.0190     | 0.4267  | 0.0270    | 0.4495  | 0.0270     | 0.6142 | 0.0270      |
| Blue_mud_Bay (17) v. Seychelles (36)            | 2642.0241 | 0.0010     | 1e-04 | 0.0010  | -7.9749  | 0.1808    | 0.0105 | 0.0010    | 0.0114 | 0.0010     | 0.0885  | 0.0020    | 0.0991  | 0.0020     | 0.1723 | 0.0020      |
| Indonesia (4) v. Wenlock_River (24)             | 1748.9899 | 0.2168     | 1e-04 | 0.1329  | -35.4065 | 0.9284    | 0.0103 | 0.0300    | 0.0113 | 0.0302     | 0.5933  | 0.0736    | 0.6135  | 0.0736     | 0.7574 | 0.0736      |
| Blue_mud_Bay (17) v. Mozambique (11)            | 1905.0446 | 0.0629     | 1e-04 | 0.0270  | -12.8792 | 1.0000    | 0.0101 | 0.0320    | 0.0114 | 0.0320     | 0.2216  | 0.0010    | 0.2416  | 0.0010     | 0.3792 | 0.0010      |
| Roper_River (9) v. Towns_River (10)             | 1592.7288 | 0.0020     | 1e-04 | 0.0090  | -24.7724 | 0.9371    | 0.0101 | 0.0190    | 0.0111 | 0.0220     | 0.4263  | 0.0270    | 0.4496  | 0.0250     | 0.6141 | 0.0250      |
| Papua_New_Guinea (9) v. Unknown (10)            | 1495.8544 | 0.0160     | 1e-04 | 0.0100  | -24.3306 | 0.9920    | 0.0101 | 0.0050    | 0.0110 | 0.0050     | 0.0700  | 0.0070    | 0.4390  | 0.0070     | 0.6038 | 0.0070      |
| Arabian_Sea (15) v. Blue_mud_Bay (17)           | 2173.1892 | 0.0080     | 1e-04 | 0.0010  | -9.6558  | 0.9930    | 0.0100 | 0.0100    | 0.0109 | 0.0100     | 0.1434  | 0.0090    | 0.1590  | 0.0090     | 0.2644 | 0.0090      |
| East_Alligator_River (47) v. Indonesia (4)      | 2259.8999 | 0.0060     | 1e-04 | 0.0589  | -20.2203 | 0.7319    | 0.0100 | 0.0231    | 0.0107 | 0.0231     | 0.4354  | 0.1472    | 0.4579  | 0.1381     | 0.6223 | 0.1421      |
| Blue_mud_Bay (17) v. East_Alligator_River (47)  | 2861.5864 | 0.0010     | 1e-04 | 0.0010  | -7.3078  | 0.0100    | 0.0099 | 0.0010    | 0.0108 | 0.0010     | 0.0762  | 0.0010    | 0.0854  | 0.0010     | 0.1502 | 0.0010      |
| Blue_mud_Bay (17) v. Roper_River (9)            | 1851.5513 | 0.0529     | 1e-04 | 0.0130  | -14.0082 | 0.9910    | 0.0096 | 0.0300    | 0.0107 | 0.0290     | 0.2526  | 0.0100    | 0.2741  | 0.0100     | 0.4205 | 0.0090      |
| Adelaide_River (18) v. Trinity_inlet (4)        | 1751.2904 | 0.0040     | 1e-04 | 0.2178  | -51.7056 | 0.1121    | 0.0096 | 0.0440    | 0.0103 | 0.0440     | 0.6912  | 0.8218    | 0.7085  | 0.8178     | 0.8276 | 0.8178      |
| Indonesia (4) v. Reunion (28)                   | 1850.3730 | 0.0500     | 1e-04 | 0.1768  | -34.5664 | 0.5329    | 0.0095 | 0.0675    | 0.0105 | 0.0688     | 0.5819  | 0.4579    | 0.6022  | 0.4559     | 0.8475 | 0.4579      |
| Blue_mud_Bay (17) v. South_Alligator_River (88) | 3600.8806 | 0.0010     | 1e-04 | 0.0010  | -5.0876  | 0.0070    | 0.0094 | 0.0010    | 0.0102 | 0.0010     | 0.0493  | 0.0010    | 0.0557  | 0.0010     | 0.1001 | 0.0010      |

Table 46: Pairwise Fst for 3416 DarTcap loci between the IWP sites (*continued*)

|                                                 | Chi2      | Chi2.p.val | D     | D.p.val | Fis       | Fis.p.val | Fst    | Fst.p.val | F'st   | F'st.p.val | Gst    | Gst.p.val | G'st   | G'st.p.val | G''st  | G''st.p.val |
|-------------------------------------------------|-----------|------------|-------|---------|-----------|-----------|--------|-----------|--------|------------|--------|-----------|--------|------------|--------|-------------|
| Adelaide_River (18) v. Towns_River (10)         | 1812.9247 | 0.0020     | 1e-04 | 0.0010  | -14.4419  | 0.9780    | 0.0094 | 0.0030    | 0.0102 | 0.0030     | 0.2364 | 0.0020    | 0.2562 | 0.0020     | 0.3984 | 0.0020      |
| Blue_mud_Bay (17) v. Clarence_River (74)        | 3350.6386 | 0.0010     | 1e-04 | 0.0010  | -4.8805   | 0.4286    | 0.0093 | 0.0010    | 0.0102 | 0.0010     | 0.0491 | 0.0010    | 0.0556 | 0.0010     | 0.0998 | 0.0010      |
| Blue_mud_Bay (17) v. Fitzroy_River (3)          | 1504.2709 | 0.5175     | 2e-04 | 0.1578  | NA        | NA        | 0.0093 | 0.1775    | 0.0100 | 0.1775     | NA     | NA        | NA     | NA         | NA     | NA          |
| Blue_mud_Bay (17) v. Darwin_Coastal (13)        | 2023.6360 | 0.0210     | 1e-04 | 0.0030  | -10.6158  | 0.9620    | 0.0092 | 0.0170    | 0.0100 | 0.0160     | 0.1655 | 0.0190    | 0.1827 | 0.0190     | 0.2987 | 0.0190      |
| Indonesia (4) v. Roper_River (9)                | 1302.7152 | 0.1858     | 2e-04 | 0.2138  | 57.8007   | 0.4702    | 0.0091 | 0.1888    | 0.0104 | 0.1798     | 1.4946 | 0.5348    | 1.4562 | 0.5318     | 1.1829 | 0.5318      |
| Clarence_River (74) v. Indonesia (4)            | 2487.5808 | 0.1479     | 1e-04 | 0.0180  | -9.9007   | 0.9869    | 0.0090 | 0.0291    | 0.0097 | 0.0291     | 0.2703 | 0.0172    | 0.2916 | 0.0182     | 0.4423 | 0.0172      |
| Arabian_Sea (15) v. Indonesia (4)               | 1560.3991 | 0.3427     | 1e-04 | 0.1019  | -71.6146  | 0.9710    | 0.0090 | 0.0689    | 0.0097 | 0.0689     | 0.7619 | 0.0270    | 0.7756 | 0.0270     | 0.8726 | 0.0270      |
| Blue_mud_Bay (17) v. Daly_River (49)            | 2911.0649 | 0.0010     | 1e-04 | 0.0010  | -6.8504   | 0.1069    | 0.0090 | 0.0010    | 0.0098 | 0.0010     | 0.0711 | 0.0010    | 0.0799 | 0.0010     | 0.1410 | 0.0010      |
| Indonesia (4) v. Sri_Lanka (12)                 | 1402.8136 | 0.2088     | 1e-04 | 0.0749  | 1084.9211 | 0.1946    | 0.0089 | 0.0649    | 0.0097 | 0.0651     | 1.0200 | 0.0802    | 1.0187 | 0.0802     | 1.0092 | 0.0802      |
| Blue_mud_Bay (17) v. Sydney_Harbour (65)        | 3254.5310 | 0.0010     | 1e-04 | 0.0010  | -5.9744   | 0.0370    | 0.0089 | 0.0010    | 0.0097 | 0.0010     | 0.0596 | 0.0010    | 0.0671 | 0.0010     | 0.1196 | 0.0010      |
| Mozambique (11) v. Wenlock_River (24)           | 2038.9295 | 0.0010     | 1e-04 | 0.0020  | -11.4864  | 1.0000    | 0.0088 | 0.0010    | 0.0096 | 0.0010     | 0.1847 | 0.0010    | 0.2024 | 0.0010     | 0.3267 | 0.0010      |
| Blue_mud_Bay (17) v. Wenlock_River (24)         | 2318.9034 | 0.0020     | 1e-04 | 0.0030  | -8.5499   | 0.9041    | 0.0088 | 0.0020    | 0.0096 | 0.0020     | 0.1064 | 0.0030    | 0.1187 | 0.0030     | 0.2035 | 0.0030      |
| Blue_mud_Bay (17) v. Papua_New_Guinea (9)       | 1764.8423 | 0.1229     | 1e-04 | 0.0290  | -14.2905  | 0.9980    | 0.0088 | 0.0529    | 0.0095 | 0.0529     | 0.2500 | 0.0110    | 0.2709 | 0.0130     | 0.4167 | 0.0130      |
| South_Alligator_River (88) v. Towns_River (10)  | 2897.7702 | 0.0010     | 1e-04 | 0.0020  | -6.3324   | 0.6973    | 0.0086 | 0.0020    | 0.0092 | 0.0020     | 0.0906 | 0.0030    | 0.1010 | 0.0030     | 0.1758 | 0.0030      |
| Daly_River (49) v. Towns_River (10)             | 2404.8295 | 0.0010     | 1e-04 | 0.0060  | -8.9135   | 0.9510    | 0.0086 | 0.0010    | 0.0092 | 0.0010     | 0.1301 | 0.0010    | 0.1439 | 0.0010     | 0.2424 | 0.0010      |
| South_Alligator_River (88) v. Trinity_inlet (4) | 2956.3054 | 0.0100     | 1e-04 | 0.1369  | -9.5168   | 0.0429    | 0.0085 | 0.0182    | 0.0091 | 0.0182     | 0.2619 | 0.0357    | 0.2834 | 0.0765     | 0.4321 | 0.6980      |
| Mozambique (11) v. Towns_River (10)             | 1597.6281 | 0.0230     | 1e-04 | 0.0370  | -21.6602  | 0.9560    | 0.0083 | 0.0240    | 0.0091 | 0.0250     | 0.3762 | 0.0360    | 0.3993 | 0.0360     | 0.5635 | 0.0360      |
| Towns_River (10) v. Wenlock_River (24)          | 2004.3581 | 0.0040     | 1e-04 | 0.1269  | -11.8097  | 0.9920    | 0.0082 | 0.0060    | 0.0089 | 0.0060     | 0.1877 | 0.0030    | 0.2054 | 0.0030     | 0.3310 | 0.0030      |
| South_Africa (21) v. Trinity_inlet (4)          | 1798.3932 | 0.0050     | 1e-04 | 0.1029  | -38.5483  | 0.0937    | 0.0081 | 0.0391    | 0.0087 | 0.0391     | 0.6192 | 0.8056    | 0.6393 | 0.7946     | 0.7772 | 0.7946      |
| Arabian_Sea (15) v. Towns_River (10)            | 1835.2962 | 0.0070     | 1e-04 | 0.0380  | -14.0075  | 1.0000    | 0.0080 | 0.0040    | 0.0088 | 0.0040     | 0.2433 | 0.0010    | 0.2638 | 0.0010     | 0.4079 | 0.0010      |
| Adelaide_River (18) v. Blue_mud_Bay (17)        | 2114.9291 | 0.0090     | 1e-04 | 0.0110  | -9.8243   | 0.9780    | 0.0077 | 0.0160    | 0.0084 | 0.0160     | 0.1332 | 0.0160    | 0.1476 | 0.0160     | 0.2478 | 0.0160      |
| South_Africa (21) v. Towns_River (10)           | 1892.1145 | 0.0010     | 1e-04 | 0.0050  | -12.9725  | 0.9950    | 0.0076 | 0.0020    | 0.0082 | 0.0020     | 0.2085 | 0.0010    | 0.2272 | 0.0010     | 0.3605 | 0.0010      |
| Sydney_Harbour (65) v. Trinity_inlet (4)        | 2594.0254 | 0.0010     | 1e-04 | 0.0559  | -12.7534  | 0.0130    | 0.0075 | 0.0330    | 0.0080 | 0.0330     | 0.3228 | 0.8967    | 0.3460 | 0.8746     | 0.5056 | 0.8816      |
| Fitzroy_River (3) v. Thailand (4)               | 989.0411  | 0.1029     | 2e-04 | 0.1109  | NA        | NA        | 0.0074 | 0.1219    | 0.0080 | 0.1219     | NA     | NA        | NA     | NA         | NA     | NA          |
| Fitzroy_River (3) v. Papua_New_Guinea (9)       | 1197.1304 | 0.2627     | 1e-04 | 0.3566  | NA        | NA        | 0.0074 | 0.1320    | NA     | NA         | NA     | NA        | NA     | NA         | NA     | NA          |
| Clarence_River (74) v. Towns_River (10)         | 2623.8601 | 0.0220     | 1e-04 | 0.0020  | -6.2361   | 1.0000    | 0.0074 | 0.0030    | 0.0080 | 0.0030     | 0.0906 | 0.0010    | 0.1012 | 0.0010     | 0.1759 | 0.0010      |
| Papua_New_Guinea (9) v. Reunion (28)            | 1927.2220 | 0.0240     | 1e-04 | 0.0200  | -12.5260  | 0.7762    | 0.0073 | 0.0210    | 0.0080 | 0.0190     | 0.2013 | 0.1499    | 0.2194 | 0.1419     | 0.3502 | 0.1429      |
| Sri_Lanka (12) v. Trinity_inlet (4)             | 1503.1102 | 0.0330     | 1e-04 | 0.0569  | -227.3737 | 0.4076    | 0.0072 | 0.0589    | 0.0078 | 0.0589     | 0.9149 | 0.5793    | 0.9205 | 0.5783     | 0.9585 | 0.5783      |
| Darwin_Coastal (13) v. Reunion (28)             | 2217.5237 | 0.0010     | 1e-04 | 0.0160  | -9.6755   | 0.0689    | 0.0072 | 0.0040    | 0.0080 | 0.0040     | 0.1301 | 0.0779    | 0.1443 | 0.0579     | 0.2428 | 0.0619      |
| East_Alligator_River (47) v. Towns_River (10)   | 2304.7931 | 0.0010     | 1e-04 | 0.0230  | -9.6023   | 0.5854    | 0.0071 | 0.0020    | 0.0077 | 0.0020     | 0.1381 | 0.0020    | 0.1523 | 0.0020     | 0.2551 | 0.0020      |
| Blue_mud_Bay (17) v. Unknown (10)               | 1823.4100 | 0.0709     | 1e-04 | 0.0180  | -13.0600  | 0.9890    | 0.0071 | 0.0599    | 0.0077 | 0.0599     | 0.2220 | 0.0200    | 0.2420 | 0.0200     | 0.3797 | 0.0200      |
| Indonesia (4) v. South_Africa (21)              | 1655.1729 | 0.1439     | 1e-04 | 0.0789  | -47.8486  | 0.9358    | 0.0070 | 0.0671    | 0.0076 | 0.0672     | 0.6669 | 0.0602    | 0.6844 | 0.0602     | 0.8107 | 0.0602      |
| Reunion (28) v. Roper_River (9)                 | 2017.2914 | 0.0090     | 1e-04 | 0.0040  | -12.2881  | 0.5055    | 0.0069 | 0.0210    | 0.0076 | 0.0210     | 0.2037 | 0.0779    | 0.2224 | 0.0739     | 0.3540 | 0.0759      |
| Reunion (28) v. South_Alligator_River (88)      | 3161.5912 | 0.0010     | 0e+00 | 0.0010  | -5.0515   | 0.6953    | 0.0069 | 0.0010    | 0.0075 | 0.0010     | 0.0339 | 0.0010    | 0.0383 | 0.0010     | 0.0699 | 0.0010      |
| Darwin_Coastal (13) v. Indonesia (4)            | 1425.2385 | 0.3616     | 2e-04 | 0.0310  | -193.2944 | 0.9609    | 0.0069 | 0.1139    | 0.0075 | 0.1149     | 0.8993 | 0.0431    | 0.9056 | 0.0431     | 0.9503 | 0.0431      |
| Sydney_Harbour (65) v. Towns_River (10)         | 2467.2546 | 0.0010     | 1e-04 | 0.0010  | -7.8019   | 0.8841    | 0.0069 | 0.0010    | 0.0074 | 0.0010     | 0.1114 | 0.0020    | 0.1237 | 0.0020     | 0.2115 | 0.0020      |
| Seychelles (36) v. Towns_River (10)             | 2141.3092 | 0.0010     | 1e-04 | 0.0030  | -10.6753  | 0.8951    | 0.0068 | 0.0040    | 0.0073 | 0.0040     | 0.1580 | 0.0070    | 0.1737 | 0.0070     | 0.2864 | 0.0070      |
| East_Alligator_River (47) v. Trinity_inlet (4)  | 2454.4429 | 0.0010     | 1e-04 | 0.2258  | -18.1408  | 0.0161    | 0.0067 | 0.0440    | 0.0072 | 0.0440     | 0.4090 | 0.9335    | 0.4326 | 0.9215     | 0.5973 | 0.9245      |
| Arabian_Sea (15) v. Papua_New_Guinea (9)        | 1716.2144 | 0.0999     | 1e-04 | 0.0739  | -15.0745  | 1.0000    | 0.0066 | 0.0080    | 0.0072 | 0.0080     | 0.2678 | 0.0030    | 0.2890 | 0.0030     | 0.4392 | 0.0030      |
| Daly_River (49) v. Trinity_inlet (4)            | 2351.4533 | 0.0020     | 1e-04 | 0.0829  | -16.3546  | 0.0817    | 0.0066 | 0.0480    | 0.0070 | 0.0480     | 0.3846 | 0.7399    | 0.4085 | 0.7177     | 0.5728 | 0.7228      |
| Mozambique (11) v. Reunion (28)                 | 2001.5428 | 0.0100     | 1e-04 | 0.0330  | -11.6557  | 0.9820    | 0.0063 | 0.0140    | 0.0069 | 0.0140     | 0.1798 | 0.0020    | 0.1970 | 0.0020     | 0.3194 | 0.0020      |
| East_Alligator_River (47) v. Mozambique (11)    | 2275.8266 | 0.0020     | 1e-04 | 0.0200  | -9.3675   | 0.8931    | 0.0062 | 0.0040    | 0.0068 | 0.0040     | 0.1348 | 0.0010    | 0.1489 | 0.0010     | 0.2500 | 0.0010      |
| Arabian_Sea (15) v. Trinity_inlet (4)           | 1632.4740 | 0.0859     | 1e-04 | 0.3227  | -53.2932  | 0.4764    | 0.0061 | 0.0739    | 0.0066 | 0.0739     | 0.7051 | 0.4462    | 0.7221 | 0.4352     | 0.8370 | 0.4377      |
| Reunion (28) v. Sydney_Harbour (65)             | 2891.3000 | 0.0010     | 0e+00 | 0.0010  | -5.8632   | 0.9770    | 0.0060 | 0.0010    | 0.0066 | 0.0010     | 0.0411 | 0.0010    | 0.0464 | 0.0010     | 0.0840 | 0.0010      |
| Sri_Lanka (12) v. Towns_River (10)              | 1608.1513 | 0.0539     | 1e-04 | 0.0669  | -17.9931  | 0.9940    | 0.0060 | 0.0519    | 0.0066 | 0.0519     | 0.3108 | 0.0140    | 0.3330 | 0.0150     | 0.4911 | 0.0140      |
| Mozambique (11) v. South_Alligator_River (88)   | 2752.7983 | 0.0040     | 1e-04 | 0.0170  | -6.2009   | 0.7053    | 0.0060 | 0.0020    | 0.0066 | 0.0020     | 0.0874 | 0.0010    | 0.0976 | 0.0010     | 0.1702 | 0.0010      |
| Seychelles (36) v. Trinity_inlet (4)            | 2212.2961 | 0.0020     | 1e-04 | 0.1578  | -22.2859  | 0.0101    | 0.0060 | 0.0991    | 0.0064 | 0.0991     | 0.4651 | 0.9576    | 0.4886 | 0.9485     | 0.6510 | 0.9505      |
| East_Alligator_River (47) v. Reunion (28)       | 2652.4144 | 0.0010     | 0e+00 | 0.0010  | -6.8905   | 0.7512    | 0.0058 | 0.0010    | 0.0063 | 0.0010     | 0.0520 | 0.0010    | 0.0584 | 0.0010     | 0.1050 | 0.0010      |
| Clarence_River (74) v. Reunion (28)             | 2970.7179 | 0.0010     | 0e+00 | 0.0010  | -4.8433   | 1.0000    | 0.0058 | 0.0010    | 0.0063 | 0.0010     | 0.0335 | 0.0010    | 0.0379 | 0.0010     | 0.0690 | 0.0010      |
| Blue_mud_Bay (17) v. Sri_Lanka (12)             | 1915.8700 | 0.0649     | 1e-04 | 0.0150  | -11.3891  | 0.9590    | 0.0057 | 0.0729    | 0.0062 | 0.0749     | 0.1798 | 0.0629    | 0.1975 | 0.0649     | 0.3198 | 0.0639      |
| Towns_River (10) v. Unknown (10)                | 1526.0653 | 0.0480     | 1e-04 | 0.0190  | -21.7538  | 0.9261    | 0.0056 | 0.0989    | 0.0061 | 0.0969     | 0.3753 | 0.0939    | 0.3984 | 0.0959     | 0.5625 | 0.0959      |
| Trinity_inlet (4) v. Wenlock_River (24)         | 1904.5321 | 0.0280     | 1e-04 | 0.3397  | -29.6457  | 0.1071    | 0.0055 | 0.1031    | 0.0060 | 0.1048     | 0.5499 | 0.7970    | 0.5722 | 0.7788     | 0.7848 | 0.7848      |
| Papua_New_Guinea (9) v. Sri_Lanka (12)          | 1525.0491 | 0.1588     | 1e-04 | 0.2418  | -19.5709  | 0.9830    | 0.0055 | 0.0340    | 0.0059 | 0.0340     | 0.3410 | 0.0120    | 0.3636 | 0.0120     | 0.5255 | 0.0120      |

Table 46: Pairwise Fst for 3416 DARtCap loci between the IWP sites (continued)

|                                                    | Chi2      | Chi2.p.val | D     | D.p.val | Fis      | Fis.p.val | Fst    | Fst.p.val | F'st   | F'st.p.val | Gst    | Gst.p.val | G'st   | G'st.p.val | G'st   | G'st.p.val |
|----------------------------------------------------|-----------|------------|-------|---------|----------|-----------|--------|-----------|--------|------------|--------|-----------|--------|------------|--------|------------|
| East_Alligator_River (47) v. Fitzroy_River (3)     | 1989.2696 | 0.1598     | 1e-04 | 0.1119  | NA       | NA        | 0.0054 | 0.1721    | 0.0058 | 0.1711     | NA     | NA        | NA     | NA         | NA     | NA         |
| Reunion (28) v. Unknown (10)                       | 1995.5362 | 0.0070     | 1e-04 | 0.0110  | -11.6580 | 0.3177    | 0.0054 | 0.0350    | 0.0059 | 0.0370     | 0.1785 | 0.2308    | 0.1956 | 0.2098     | 0.3175 | 0.2158     |
| Reunion (28) v. Wenlock_River (24)                 | 2317.4735 | 0.0010     | 1e-04 | 0.0010  | -8.0692  | 0.9760    | 0.0053 | 0.0010    | 0.0058 | 0.0010     | 0.0790 | 0.0010    | 0.0884 | 0.0010     | 0.1552 | 0.0010     |
| Papua_New_Guinea (9) v. Seychelles (36)            | 1930.8100 | 0.0450     | 1e-04 | 0.1219  | -11.4056 | 0.8921    | 0.0053 | 0.0140    | 0.0059 | 0.0140     | 0.1769 | 0.0310    | 0.1937 | 0.0320     | 0.3149 | 0.0320     |
| Clarence_River (74) v. Papua_New_Guinea (9)        | 2326.9965 | 0.5385     | 1e-04 | 0.0170  | -6.5637  | 0.9980    | 0.0052 | 0.0110    | 0.0056 | 0.0110     | 0.1010 | 0.0010    | 0.1125 | 0.0010     | 0.1940 | 0.0010     |
| Thailand (4) v. Towns_River (10)                   | 1371.3016 | 0.0480     | 1e-04 | 0.3187  | 123.5569 | 0.0511    | 0.0052 | 0.2523    | 0.0058 | 0.2523     | 1.1964 | 0.9559    | 1.1823 | 0.9559     | 1.0830 | 0.9559     |
| Clarence_River (74) v. Mozambique (11)             | 2553.2382 | 0.0629     | 1e-04 | 0.0090  | -6.0722  | 1.0000    | 0.0052 | 0.0040    | 0.0057 | 0.0040     | 0.0872 | 0.0010    | 0.0975 | 0.0010     | 0.1699 | 0.0010     |
| Arabian_Sea (15) v. Darwin_Coastal (13)            | 1910.4886 | 0.0050     | 0e+00 | 0.5145  | -11.1126 | 0.9780    | 0.0052 | 0.0050    | 0.0056 | 0.0050     | 0.1778 | 0.0060    | 0.1955 | 0.0050     | 0.3169 | 0.0050     |
| Mozambique (11) v. Seychelles (36)                 | 2100.4591 | 0.0010     | 1e-04 | 0.0010  | -10.5278 | 0.9920    | 0.0051 | 0.0030    | 0.0056 | 0.0030     | 0.1556 | 0.0010    | 0.1713 | 0.0010     | 0.2829 | 0.0010     |
| Adelaide_River (18) v. Papua_New_Guinea (9)        | 1633.3815 | 0.1299     | 1e-04 | 0.0210  | -15.5144 | 0.9151    | 0.0051 | 0.0320    | 0.0055 | 0.0320     | 0.2595 | 0.0290    | 0.2800 | 0.0280     | 0.4283 | 0.0280     |
| Darwin_Coastal (13) v. Mozambique (11)             | 1670.2078 | 0.0739     | 1e-04 | 0.0330  | -15.5169 | 0.9990    | 0.0050 | 0.0320    | 0.0057 | 0.0300     | 0.2737 | 0.0010    | 0.2955 | 0.0010     | 0.4469 | 0.0010     |
| Daly_River (49) v. Mozambique (11)                 | 2340.9063 | 0.0010     | 1e-04 | 0.0300  | -8.6633  | 0.9960    | 0.0049 | 0.0010    | 0.0054 | 0.0010     | 0.1254 | 0.0010    | 0.1389 | 0.0010     | 0.2348 | 0.0010     |
| Adelaide_River (18) v. Reunion (28)                | 2121.8280 | 0.0020     | 0e+00 | 0.0080  | -9.2177  | 0.7982    | 0.0049 | 0.0040    | 0.0054 | 0.0040     | 0.1025 | 0.0220    | 0.1140 | 0.0200     | 0.1964 | 0.0200     |
| Darwin_Coastal (13) v. Fitzroy_River (3)           | 1348.0815 | 0.6484     | 2e-04 | 0.1099  | NA       | NA        | 0.0047 | 0.2063    | 0.0051 | 0.2063     | NA     | NA        | NA     | NA         | NA     | NA         |
| Trinity_inlet (4) v. Unknown (10)                  | 1339.6359 | 0.0210     | 1e-04 | 0.3457  | 161.3117 | 0.0524    | 0.0045 | 0.1497    | 0.0049 | 0.1503     | 1.1420 | 0.9568    | 1.1318 | 0.9568     | 1.0615 | 0.9568     |
| Reunion (28) v. Seychelles (36)                    | 2332.0104 | 0.0010     | 0e+00 | 0.0080  | -7.5897  | 0.9970    | 0.0045 | 0.0010    | 0.0049 | 0.0010     | 0.0621 | 0.0010    | 0.0697 | 0.0010     | 0.1240 | 0.0010     |
| Fitzroy_River (3) v. Sri_Lanka (12)                | 1355.5475 | 0.3746     | 1e-04 | 0.2877  | NA       | NA        | 0.0044 | 0.2205    | 0.0048 | 0.2247     | NA     | NA        | NA     | NA         | NA     | NA         |
| Clarence_River (74) v. Trinity_inlet (4)           | 2669.1115 | 0.0260     | 1e-04 | 0.2018  | -9.2359  | 0.2214    | 0.0043 | 0.1263    | 0.0046 | 0.1273     | 0.2559 | 0.4541    | 0.2776 | 0.4255     | 0.4248 | 0.4377     |
| Clarence_River (74) v. Roper_River (9)             | 2508.0552 | 0.1179     | 1e-04 | 0.0050  | -6.3572  | 0.8791    | 0.0042 | 0.0320    | 0.0045 | 0.0320     | 0.1012 | 0.0020    | 0.1130 | 0.0020     | 0.1945 | 0.0020     |
| Arabian_Sea (15) v. Mozambique (11)                | 1795.4018 | 0.0869     | 1e-04 | 0.2717  | -13.4631 | 1.0000    | 0.0041 | 0.0290    | 0.0047 | 0.0250     | 0.2345 | 0.0010    | 0.2548 | 0.0010     | 0.3964 | 0.0010     |
| Daly_River (49) v. Reunion (28)                    | 2558.8318 | 0.0010     | 0e+00 | 0.0010  | -6.5805  | 0.9890    | 0.0040 | 0.0010    | 0.0044 | 0.0010     | 0.0485 | 0.0010    | 0.0546 | 0.0010     | 0.0983 | 0.0010     |
| Adelaide_River (18) v. Darwin_Coastal (13)         | 1862.0462 | 0.0120     | 1e-04 | 0.1179  | -11.3164 | 0.3497    | 0.0040 | 0.0240    | 0.0044 | 0.0240     | 0.1680 | 0.0659    | 0.1847 | 0.0619     | 0.3020 | 0.0639     |
| Darwin_Coastal (13) v. Papua_New_Guinea (9)        | 1550.2356 | 0.3237     | 1e-04 | 0.5195  | -17.3639 | 0.9980    | 0.0040 | 0.0729    | 0.0044 | 0.0729     | 0.3074 | 0.0100    | 0.3297 | 0.0120     | 0.4873 | 0.0110     |
| Roper_River (9) v. South_Alligator_River (88)      | 2717.7623 | 0.0140     | 1e-04 | 0.0040  | -6.4670  | 0.1588    | 0.0039 | 0.0400    | 0.0043 | 0.0400     | 0.1007 | 0.0120    | 0.1122 | 0.0090     | 0.1934 | 0.0100     |
| Sydney_Harbour (65) v. Wenlock_River (24)          | 2707.1511 | 0.0010     | 0e+00 | 0.0010  | -5.8688  | 0.3287    | 0.0039 | 0.0010    | 0.0042 | 0.0010     | 0.0440 | 0.0010    | 0.0497 | 0.0010     | 0.0898 | 0.0010     |
| Blue_mud_Bay (17) v. Thailand (4)                  | 1612.2558 | 0.2567     | 1e-04 | 0.1259  | -43.0209 | 0.3513    | 0.0037 | 0.3029    | 0.0039 | 0.3039     | 0.6487 | 0.6487    | 0.6678 | 0.6487     | 0.7985 | 0.6477     |
| Arabian_Sea (15) v. South_Alligator_River (88)     | 3346.1117 | 0.0010     | 0e+00 | 0.0110  | -5.1203  | 0.0120    | 0.0037 | 0.0020    | 0.0040 | 0.0020     | 0.0516 | 0.0779    | 0.0581 | 0.0579     | 0.1043 | 0.0679     |
| Adelaide_River (18) v. Roper_River (9)             | 1736.7142 | 0.0190     | 1e-04 | 0.1049  | -15.0451 | 0.7932    | 0.0037 | 0.0779    | 0.0040 | 0.0769     | 0.2589 | 0.0330    | 0.2798 | 0.0290     | 0.4279 | 0.0290     |
| Reunion (28) v. Sri_Lanka (12)                     | 2078.6819 | 0.0060     | 1e-04 | 0.1169  | -10.3263 | 0.1908    | 0.0036 | 0.0729    | 0.0039 | 0.0729     | 0.1420 | 0.4575    | 0.1568 | 0.4416     | 0.2617 | 0.4528     |
| Reunion (28) v. South_Africa (21)                  | 2165.2760 | 0.0050     | 0e+00 | 0.0030  | -8.5336  | 0.7033    | 0.0036 | 0.0170    | 0.0039 | 0.0180     | 0.0878 | 0.0310    | 0.0980 | 0.0280     | 0.1708 | 0.0300     |
| East_Alligator_River (47) v. Papua_New_Guinea (9)  | 2053.2167 | 0.0889     | 1e-04 | 0.0719  | -10.1188 | 0.5854    | 0.0036 | 0.0480    | 0.0039 | 0.0480     | 0.1528 | 0.0839    | 0.1679 | 0.0779     | 0.2782 | 0.0809     |
| Darwin_Coastal (13) v. East_Alligator_River (47)   | 2477.1204 | 0.0010     | 0e+00 | 0.0799  | -7.9754  | 0.0020    | 0.0036 | 0.0080    | 0.0039 | 0.0080     | 0.0952 | 0.4356    | 0.1062 | 0.3427     | 0.1838 | 0.3846     |
| Papua_New_Guinea (9) v. Sydney_Harbour (65)        | 2113.4285 | 0.5914     | 1e-04 | 0.0579  | -8.3339  | 0.9191    | 0.0036 | 0.0280    | 0.0039 | 0.0290     | 0.1251 | 0.0330    | 0.1383 | 0.0330     | 0.2341 | 0.0330     |
| Mozambique (11) v. Sydney_Harbour (65)             | 2433.8819 | 0.0030     | 1e-04 | 0.0260  | -7.5988  | 0.9481    | 0.0035 | 0.0150    | 0.0038 | 0.0150     | 0.1068 | 0.0010    | 0.1187 | 0.0010     | 0.2037 | 0.0010     |
| Mozambique (11) v. Roper_River (9)                 | 1555.3710 | 0.0460     | 1e-04 | 0.0490  | -23.2409 | 0.4456    | 0.0035 | 0.1279    | 0.0039 | 0.1309     | 0.4092 | 0.4595    | 0.4327 | 0.4486     | 0.5974 | 0.4518     |
| Darwin_Coastal (13) v. Towns_River (10)            | 1645.6191 | 0.0939     | 1e-04 | 0.3626  | -15.9843 | 0.9850    | 0.0035 | 0.1658    | 0.0038 | 0.1658     | 0.2784 | 0.0410    | 0.3001 | 0.0450     | 0.4525 | 0.0430     |
| East_Alligator_River (47) v. Roper_River (9)       | 2200.2523 | 0.0040     | 1e-04 | 0.0739  | -9.9052  | 0.1708    | 0.0034 | 0.0539    | 0.0037 | 0.0519     | 0.1549 | 0.0430    | 0.1705 | 0.0340     | 0.2817 | 0.0380     |
| Daly_River (49) v. Unknown (10)                    | 2182.7564 | 0.0220     | 1e-04 | 0.0020  | -8.8620  | 0.5774    | 0.0033 | 0.0270    | 0.0036 | 0.0270     | 0.1269 | 0.0160    | 0.1405 | 0.0150     | 0.2373 | 0.0160     |
| Mozambique (11) v. Sri_Lanka (12)                  | 1608.2682 | 0.1489     | 1e-04 | 0.1938  | -17.2515 | 0.9970    | 0.0033 | 0.1189    | 0.0036 | 0.1219     | 0.3013 | 0.0030    | 0.3235 | 0.0030     | 0.4802 | 0.0030     |
| Mozambique (11) v. Unknown (10)                    | 1573.3394 | 0.0240     | 1e-04 | 0.0160  | -20.5176 | 0.8462    | 0.0033 | 0.1129    | 0.0036 | 0.1179     | 0.3614 | 0.0909    | 0.3846 | 0.0889     | 0.5479 | 0.0889     |
| Fitzroy_River (3) v. Trinity_inlet (4)             | 957.9348  | 0.5135     | 2e-04 | 0.1219  | NA       | NA        | 0.0031 | 0.4070    | 0.0034 | 0.4070     | NA     | NA        | NA     | NA         | NA     | NA         |
| Darwin_Coastal (13) v. Unknown (10)                | 1631.5012 | 0.0659     | 1e-04 | 0.0280  | -15.4535 | 0.9820    | 0.0030 | 0.0879    | 0.0033 | 0.0859     | 0.2715 | 0.0190    | 0.2932 | 0.0200     | 0.4442 | 0.0190     |
| Mozambique (11) v. Trinity_inlet (4)               | 1410.4190 | 0.0619     | 2e-04 | 0.1439  | 174.0446 | 0.0260    | 0.0030 | 0.2226    | 0.0032 | 0.2270     | 1.1295 | 0.9812    | 1.1202 | 0.9812     | 1.0564 | 0.9812     |
| Papua_New_Guinea (9) v. South_Alligator_River (88) | 2486.1042 | 0.1788     | 0e+00 | 0.1938  | -6.6420  | 0.8042    | 0.0030 | 0.0759    | 0.0032 | 0.0759     | 0.0993 | 0.0589    | 0.1103 | 0.0569     | 0.1906 | 0.0569     |
| Seychelles (36) v. Unknown (10)                    | 1986.4551 | 0.0110     | 1e-04 | 0.0340  | -10.6108 | 0.3626    | 0.0029 | 0.0659    | 0.0032 | 0.0659     | 0.1552 | 0.1548    | 0.1709 | 0.1479     | 0.2823 | 0.1508     |
| Roper_River (9) v. Wenlock_River (24)              | 1824.1022 | 0.1688     | 1e-04 | 0.1548  | -12.4579 | 0.8861    | 0.0029 | 0.1069    | 0.0031 | 0.1089     | 0.2101 | 0.0270    | 0.2292 | 0.0270     | 0.3630 | 0.0260     |
| Clarence_River (74) v. Seychelles (36)             | 2842.1582 | 0.0010     | 0e+00 | 0.0010  | -4.5702  | 1.0000    | 0.0028 | 0.0010    | 0.0031 | 0.0010     | 0.0255 | 0.0010    | 0.0290 | 0.0010     | 0.0532 | 0.0010     |
| Daly_River (49) v. Roper_River (9)                 | 2196.8381 | 0.0170     | 1e-04 | 0.0140  | -9.2527  | 0.5425    | 0.0028 | 0.0739    | 0.0030 | 0.0729     | 0.1453 | 0.0250    | 0.1604 | 0.0250     | 0.2669 | 0.0240     |
| Darwin_Coastal (13) v. Trinity_inlet (4)           | 1482.6685 | 0.1758     | 1e-04 | 0.2757  | -97.0409 | 0.3746    | 0.0027 | 0.2527    | 0.0029 | 0.2527     | 0.8177 | 0.6042    | 0.8291 | 0.6012     | 0.9060 | 0.6012     |
| Roper_River (9) v. Unknown (10)                    | 1497.2012 | 0.0210     | 1e-04 | 0.0030  | -23.5918 | 0.7962    | 0.0027 | 0.1618    | 0.0029 | 0.1638     | 0.4115 | 0.1628    | 0.4350 | 0.1618     | 0.5997 | 0.1618     |
| Roper_River (9) v. Sri_Lanka (12)                  | 1577.5046 | 0.0509     | 1e-04 | 0.0899  | -19.0935 | 0.9311    | 0.0027 | 0.1439    | 0.0029 | 0.1499     | 0.3405 | 0.0330    | 0.3635 | 0.0330     | 0.5252 | 0.0330     |
| Papua_New_Guinea (9) v. Wenlock_River (24)         | 1756.5815 | 0.4076     | 1e-04 | 0.1928  | -12.6433 | 0.9850    | 0.0026 | 0.1479    | 0.0029 | 0.1479     | 0.2068 | 0.0200    | 0.2253 | 0.0220     | 0.3580 | 0.0200     |
| Papua_New_Guinea (9) v. Roper_River (9)            | 1390.0644 | 0.2827     | 1e-04 | 0.4116  | -28.3085 | 0.7512    | 0.0026 | 0.2358    | 0.0029 | 0.2308     | 0.4677 | 0.2198    | 0.4904 | 0.2178     | 0.6528 | 0.2178     |



Table 46: Pairwise Fst for 3416 DARtCap loci between the IWP sites (continued)

|                                                   | Chi2      | Chi2.p.val | D     | D.p.val | Fis      | Fis.p.val | Fst    | Fst.p.val | F'st   | F'st.p.val | Gst    | Gst.p.val | G'st   | G'st.p.val | G''st  | G''st.p.val |
|---------------------------------------------------|-----------|------------|-------|---------|----------|-----------|--------|-----------|--------|------------|--------|-----------|--------|------------|--------|-------------|
| Seychelles (36) v. Wenlock_River (24)             | 2314.3078 | 0.0010     | 0e+00 | 0.0140  | -7.4752  | 0.3876    | 0.0026 | 0.0080    | 0.0028 | 0.0080     | 0.0651 | 0.0210    | 0.0731 | 0.0200     | 0.1298 | 0.0200      |
| Unknown (10) v. Wenlock_River (24)                | 1812.7937 | 0.1528     | 1e-04 | 0.0270  | -11.7854 | 0.8362    | 0.0026 | 0.0779    | 0.0028 | 0.0799     | 0.1848 | 0.0280    | 0.2024 | 0.0280     | 0.3268 | 0.0290      |
| Seychelles (36) v. Sydney_Harbour (65)            | 2677.3422 | 0.0010     | 0e+00 | 0.0020  | -5.6200  | 0.9151    | 0.0026 | 0.0010    | 0.0028 | 0.0010     | 0.0321 | 0.0010    | 0.0363 | 0.0010     | 0.0662 | 0.0010      |
| Arabian_Sea (15) v. East_Alligator_River (47)     | 2544.4612 | 0.0010     | 0e+00 | 0.4655  | -7.4604  | 0.0070    | 0.0025 | 0.0240    | 0.0027 | 0.0240     | 0.0803 | 0.4735    | 0.0898 | 0.3936     | 0.1575 | 0.4277      |
| South_Africa (21) v. Unknown (10)                 | 1709.9569 | 0.2907     | 1e-04 | 0.2188  | -12.8478 | 0.7812    | 0.0024 | 0.1079    | 0.0026 | 0.1079     | 0.2046 | 0.0509    | 0.2232 | 0.0480     | 0.3551 | 0.0500      |
| Thailand (4) v. Trinity_inlet (4)                 | 1056.3377 | 0.2228     | 1e-04 | 0.4955  | 15.2219  | 0.7152    | 0.0024 | 0.3327    | 0.0026 | 0.3157     | 9.5347 | 0.2690    | 8.5308 | 0.2690     | 1.7149 | 0.2384      |
| Darwin_Coastal (13) v. Sydney_Harbour (65)        | 2601.2776 | 0.0010     | 0e+00 | 0.3257  | -6.6880  | 0.0050    | 0.0023 | 0.0350    | 0.0025 | 0.0350     | 0.0765 | 0.5445    | 0.0858 | 0.4835     | 0.1508 | 0.5005      |
| Darwin_Coastal (13) v. Sri_Lanka (12)             | 1708.2605 | 0.1049     | 1e-04 | 0.1808  | -13.3115 | 0.8821    | 0.0023 | 0.1578    | 0.0025 | 0.1578     | 0.2228 | 0.1499    | 0.2427 | 0.1499     | 0.3807 | 0.1499      |
| Adelaide_River (18) v. Unknown (10)               | 1608.8782 | 0.3317     | 1e-04 | 0.0500  | -14.2537 | 0.6294    | 0.0023 | 0.1399    | 0.0025 | 0.1389     | 0.2308 | 0.1019    | 0.2506 | 0.0909     | 0.3911 | 0.0929      |
| Daly_River (49) v. Darwin_Coastal (13)            | 2432.8262 | 0.0010     | 0e+00 | 0.3187  | -7.5514  | 0.0400    | 0.0023 | 0.0509    | 0.0024 | 0.0509     | 0.0895 | 0.3886    | 0.1001 | 0.3447     | 0.1741 | 0.3636      |
| Darwin_Coastal (13) v. South_Alligator_River (88) | 3020.1834 | 0.0010     | 0e+00 | 0.0689  | -5.4505  | 0.0070    | 0.0022 | 0.0460    | 0.0024 | 0.0460     | 0.0608 | 0.5495    | 0.0683 | 0.4705     | 0.1217 | 0.5005      |
| Darwin_Coastal (13) v. Seychelles (36)            | 2232.0110 | 0.0010     | 0e+00 | 0.1778  | -8.7589  | 0.0220    | 0.0022 | 0.0719    | 0.0024 | 0.0709     | 0.1092 | 0.6114    | 0.1215 | 0.5495     | 0.2080 | 0.5774      |
| Papua_New_Guinea (9) v. South_Africa (21)         | 1692.4121 | 0.3646     | 1e-04 | 0.0959  | -13.8424 | 0.9720    | 0.0022 | 0.1778    | 0.0024 | 0.1778     | 0.2283 | 0.0410    | 0.2477 | 0.0400     | 0.3876 | 0.0400      |
| Clarence_River (74) v. South_Africa (21)          | 2637.0514 | 0.0330     | 0e+00 | 0.0140  | -5.0636  | 0.9491    | 0.0022 | 0.0110    | 0.0024 | 0.0110     | 0.0401 | 0.0050    | 0.0453 | 0.0050     | 0.0821 | 0.0050      |
| Roper_River (9) v. Sydney_Harbour (65)            | 2381.0609 | 0.0120     | 1e-04 | 0.0270  | -7.9318  | 0.3576    | 0.0021 | 0.1239    | 0.0023 | 0.1259     | 0.1231 | 0.0420    | 0.1365 | 0.0370     | 0.2312 | 0.0380      |
| Clarence_River (74) v. Sri_Lanka (12)             | 2584.2490 | 0.0599     | 0e+00 | 0.0509  | -5.7213  | 0.8621    | 0.0021 | 0.0769    | 0.0023 | 0.0769     | 0.0690 | 0.0759    | 0.0776 | 0.0819     | 0.1372 | 0.0799      |
| Arabian_Sea (15) v. Sydney_Harbour (65)           | 2905.2078 | 0.0010     | 0e+00 | 0.0320  | -6.1908  | 0.0470    | 0.0021 | 0.0350    | 0.0023 | 0.0350     | 0.0636 | 0.3806    | 0.0715 | 0.3407     | 0.1271 | 0.3616      |
| Adelaide_River (18) v. Wenlock_River (24)         | 1976.3190 | 0.0609     | 0e+00 | 0.0370  | -9.2034  | 0.9471    | 0.0021 | 0.0689    | 0.0023 | 0.0689     | 0.1065 | 0.0480    | 0.1184 | 0.0480     | 0.2033 | 0.0490      |
| Fitzroy_River (3) v. South_Alligator_River (88)   | 2156.0229 | 0.7113     | 1e-04 | 0.2857  | NA       | NA        | 0.0021 | 0.3323    | NA     | NA         | NA     | NA        | NA     | NA         | NA     | NA          |
| Daly_River (49) v. Sri_Lanka (12)                 | 2290.0326 | 0.0070     | 0e+00 | 0.1129  | -8.0934  | 0.4046    | 0.0021 | 0.0879    | 0.0022 | 0.0879     | 0.1006 | 0.2408    | 0.1120 | 0.2218     | 0.1931 | 0.2288      |
| Arabian_Sea (15) v. Reunion (28)                  | 2269.4690 | 0.0010     | 0e+00 | 0.0789  | -8.7636  | 0.0380    | 0.0020 | 0.1409    | 0.0022 | 0.1389     | 0.1073 | 0.5714    | 0.1194 | 0.5365     | 0.2047 | 0.5524      |
| Arabian_Sea (15) v. Clarence_River (74)           | 3038.3218 | 0.0010     | 0e+00 | 0.4965  | -5.0190  | 0.4326    | 0.0020 | 0.0569    | 0.0022 | 0.0569     | 0.0511 | 0.1099    | 0.0578 | 0.1059     | 0.1036 | 0.1079      |
| Seychelles (36) v. South_Alligator_River (88)     | 2819.2585 | 0.0010     | 0e+00 | 0.0010  | -4.7139  | 0.4575    | 0.0020 | 0.0010    | 0.0022 | 0.0010     | 0.0245 | 0.0010    | 0.0278 | 0.0010     | 0.0511 | 0.0010      |
| Roper_River (9) v. South_Africa (21)              | 1789.5620 | 0.0400     | 1e-04 | 0.2418  | -13.6047 | 0.8551    | 0.0019 | 0.1958    | 0.0021 | 0.1998     | 0.2309 | 0.0490    | 0.2508 | 0.0480     | 0.3913 | 0.0480      |
| South_Africa (21) v. Wenlock_River (24)           | 2050.3229 | 0.0330     | 0e+00 | 0.0370  | -8.5770  | 0.9201    | 0.0019 | 0.0679    | 0.0021 | 0.0679     | 0.0926 | 0.0659    | 0.1033 | 0.0659     | 0.1793 | 0.0659      |
| Arabian_Sea (15) v. Daly_River (49)               | 2622.2411 | 0.0010     | 0e+00 | 0.2547  | -6.9893  | 0.0769    | 0.0019 | 0.0699    | 0.0020 | 0.0699     | 0.0749 | 0.3407    | 0.0840 | 0.2857     | 0.1478 | 0.3027      |
| Adelaide_River (18) v. Mozambique (11)            | 1707.2964 | 0.1618     | 1e-04 | 0.3506  | -13.9099 | 0.9970    | 0.0018 | 0.2008    | 0.0021 | 0.1948     | 0.2267 | 0.0010    | 0.2462 | 0.0010     | 0.3855 | 0.0010      |
| Roper_River (9) v. Seychelles (36)                | 1987.1160 | 0.0260     | 1e-04 | 0.2118  | -11.1310 | 0.4176    | 0.0018 | 0.2278    | 0.0020 | 0.2298     | 0.1767 | 0.1189    | 0.1938 | 0.1149     | 0.3149 | 0.1159      |
| Clarence_River (74) v. Wenlock_River (24)         | 2748.2030 | 0.0090     | 0e+00 | 0.0060  | -4.7666  | 0.8991    | 0.0018 | 0.0160    | 0.0020 | 0.0160     | 0.0342 | 0.0080    | 0.0388 | 0.0080     | 0.0706 | 0.0080      |
| Daly_River (49) v. Fitzroy_River (3)              | 2019.8560 | 0.2847     | 1e-04 | 0.3556  | NA       | NA        | 0.0018 | 0.3371    | 0.0019 | 0.3371     | NA     | NA        | NA     | NA         | NA     | NA          |
| Daly_River (49) v. Wenlock_River (24)             | 2405.4276 | 0.0030     | 0e+00 | 0.1479  | -6.5842  | 0.3816    | 0.0018 | 0.0230    | 0.0020 | 0.0230     | 0.0517 | 0.0300    | 0.0582 | 0.0300     | 0.1045 | 0.0290      |
| Adelaide_River (18) v. Seychelles (36)            | 2109.7935 | 0.0110     | 0e+00 | 0.0440  | -8.5416  | 0.5664    | 0.0018 | 0.0679    | 0.0020 | 0.0679     | 0.0864 | 0.1379    | 0.0964 | 0.1359     | 0.1682 | 0.1389      |
| South_Alligator_River (88) v. Wenlock_River (24)  | 2854.0892 | 0.0010     | 0e+00 | 0.0559  | -4.9225  | 0.0430    | 0.0018 | 0.0190    | 0.0019 | 0.0190     | 0.0339 | 0.0649    | 0.0384 | 0.0539     | 0.0699 | 0.0589      |
| Arabian_Sea (15) v. Unknown (10)                  | 1714.4087 | 0.1798     | 1e-04 | 0.0659  | -13.6519 | 0.9341    | 0.0018 | 0.1808    | 0.0019 | 0.1808     | 0.2356 | 0.0450    | 0.2559 | 0.0450     | 0.3978 | 0.0450      |
| Adelaide_River (18) v. Arabian_Sea (15)           | 1898.0038 | 0.0500     | 0e+00 | 0.4765  | -10.3121 | 0.3177    | 0.0017 | 0.1489    | 0.0019 | 0.1479     | 0.1437 | 0.2378    | 0.1586 | 0.2238     | 0.2643 | 0.2328      |
| Sri_Lanka (12) v. Sydney_Harbour (65)             | 2404.9826 | 0.0320     | 0e+00 | 0.0679  | -7.1263  | 0.2767    | 0.0017 | 0.1159    | 0.0019 | 0.1159     | 0.0856 | 0.5035    | 0.0957 | 0.4865     | 0.1670 | 0.4977      |
| Arabian_Sea (15) v. Roper_River (9)               | 1686.4100 | 0.2348     | 1e-04 | 0.2547  | -14.9567 | 0.9491    | 0.0017 | 0.2398    | 0.0019 | 0.2368     | 0.2697 | 0.0330    | 0.2914 | 0.0300     | 0.4419 | 0.0310      |
| South_Alligator_River (88) v. Sydney_Harbour (65) | 3078.4199 | 0.0010     | 0e+00 | 0.0020  | -3.8867  | 0.6064    | 0.0017 | 0.0010    | 0.0018 | 0.0010     | 0.0142 | 0.0010    | 0.0162 | 0.0010     | 0.0300 | 0.0010      |
| Clarence_River (74) v. Darwin_Coastal (13)        | 2647.7639 | 0.0190     | 0e+00 | 0.1628  | -5.4426  | 0.2697    | 0.0017 | 0.1129    | 0.0018 | 0.1129     | 0.0618 | 0.2298    | 0.0697 | 0.2188     | 0.1238 | 0.2228      |
| East_Alligator_River (47) v. Wenlock_River (24)   | 2346.9028 | 0.0020     | 0e+00 | 0.0879  | -6.9942  | 0.0120    | 0.0017 | 0.0260    | 0.0018 | 0.0260     | 0.0552 | 0.1109    | 0.0620 | 0.0979     | 0.1111 | 0.1069      |
| Daly_River (49) v. Papua_New_Guinea (9)           | 2036.7218 | 0.3197     | 1e-04 | 0.1908  | -9.4690  | 0.9291    | 0.0016 | 0.2008    | 0.0017 | 0.1998     | 0.1432 | 0.0549    | 0.1578 | 0.0559     | 0.2633 | 0.0559      |
| Adelaide_River (18) v. South_Africa (21)          | 1879.9233 | 0.1029     | 0e+00 | 0.1249  | -9.9455  | 0.8831    | 0.0016 | 0.1359    | 0.0017 | 0.1359     | 0.1199 | 0.1239    | 0.1329 | 0.1229     | 0.2257 | 0.1229      |
| Clarence_River (74) v. South_Alligator_River (88) | 3314.7268 | 0.0010     | 0e+00 | 0.0010  | -3.1910  | 0.0969    | 0.0016 | 0.0010    | 0.0017 | 0.0010     | 0.0110 | 0.0010    | 0.0125 | 0.0010     | 0.0233 | 0.0010      |
| Sri_Lanka (12) v. Wenlock_River (24)              | 1903.0051 | 0.1628     | 0e+00 | 0.5215  | -10.3649 | 0.6304    | 0.0015 | 0.1858    | 0.0017 | 0.1858     | 0.1472 | 0.2777    | 0.1624 | 0.2717     | 0.2699 | 0.2727      |
| South_Africa (21) v. Sydney_Harbour (65)          | 2507.1685 | 0.0040     | 0e+00 | 0.0699  | -6.1389  | 0.3097    | 0.0015 | 0.0519    | 0.0016 | 0.0519     | 0.0490 | 0.1399    | 0.0552 | 0.1349     | 0.0994 | 0.1369      |
| Sri_Lanka (12) v. Unknown (10)                    | 1585.8206 | 0.0509     | 1e-04 | 0.0260  | -17.1253 | 0.9001    | 0.0015 | 0.2248    | 0.0016 | 0.2238     | 0.2984 | 0.0959    | 0.3205 | 0.0969     | 0.4767 | 0.0959      |
| Mozambique (11) v. South_Africa (21)              | 1765.9109 | 0.2607     | 0e+00 | 0.6713  | -12.6116 | 0.9980    | 0.0015 | 0.1968    | 0.0016 | 0.2028     | 0.2012 | 0.0010    | 0.2197 | 0.0010     | 0.3504 | 0.0010      |
| South_Alligator_River (88) v. Unknown (10)        | 2469.8689 | 0.1908     | 1e-04 | 0.0190  | -6.3938  | 0.2088    | 0.0014 | 0.1758    | 0.0015 | 0.1758     | 0.0879 | 0.1908    | 0.0981 | 0.1708     | 0.1710 | 0.1799      |
| Arabian_Sea (15) v. South_Africa (21)             | 2004.8732 | 0.0100     | 0e+00 | 0.3047  | -9.5733  | 0.2667    | 0.0013 | 0.1838    | 0.0014 | 0.1828     | 0.1269 | 0.3077    | 0.1407 | 0.2937     | 0.2375 | 0.2987      |
| Daly_River (49) v. Seychelles (36)                | 2423.7529 | 0.0030     | 0e+00 | 0.0010  | -6.2612  | 0.9261    | 0.0013 | 0.0300    | 0.0014 | 0.0300     | 0.0386 | 0.0210    | 0.0435 | 0.0220     | 0.0791 | 0.0220      |
| Darwin_Coastal (13) v. Wenlock_River (24)         | 1943.7442 | 0.1039     | 1e-04 | 0.0380  | -9.6767  | 0.1798    | 0.0013 | 0.1978    | 0.0014 | 0.1978     | 0.1328 | 0.4356    | 0.1472 | 0.4166     | 0.2472 | 0.4236      |
| Clarence_River (74) v. Unknown (10)               | 2399.8405 | 0.3956     | 0e+00 | 0.1109  | -6.1173  | 0.9371    | 0.0013 | 0.2008    | 0.0014 | 0.2008     | 0.0860 | 0.0280    | 0.0962 | 0.0280     | 0.1678 | 0.0280      |
| Clarence_River (74) v. Daly_River (49)            | 2752.4200 | 0.0260     | 0e+00 | 0.0150  | -4.1806  | 1.0000    | 0.0012 | 0.0130    | 0.0012 | 0.0130     | 0.0187 | 0.0090    | 0.0213 | 0.0090     | 0.0392 | 0.0090      |

Table 46: Pairwise Fst for 3416 DArTcap loci between the IWP sites (*continued*)

|                                                         | Chi2      | Chi2.p.val | D     | D.p.val | Fis       | Fis.p.val | Fst     | Fst.p.val | F'st    | F'st.p.val | Gst    | Gst.p.val | G'st   | G'st.p.val | G''st  | G''st.p.val |
|---------------------------------------------------------|-----------|------------|-------|---------|-----------|-----------|---------|-----------|---------|------------|--------|-----------|--------|------------|--------|-------------|
| Daly_River (49) v. South_Alligator_River (88)           | 2810.8610 | 0.0030     | 0e+00 | 0.0150  | -4.3444   | 0.1948    | 0.0011  | 0.0110    | 0.0012  | 0.0110     | 0.0182 | 0.0160    | 0.0206 | 0.0140     | 0.0382 | 0.0140      |
| Clarence_River (74) v. Sydney_Harbour (65)              | 2878.2925 | 0.0060     | 0e+00 | 0.3536  | -3.8645   | 1.0000    | 0.0011  | 0.0080    | 0.0012  | 0.0080     | 0.0149 | 0.0070    | 0.0170 | 0.0070     | 0.0315 | 0.0070      |
| East_Alligator_River (47) v. Seychelles (36)            | 2325.5770 | 0.0100     | 0e+00 | 0.1009  | -6.6050   | 0.2208    | 0.0011  | 0.0529    | 0.0012  | 0.0529     | 0.0411 | 0.0569    | 0.0463 | 0.0549     | 0.0839 | 0.0559      |
| East_Alligator_River (47) v. South_Africa (21)          | 2308.1099 | 0.0040     | 0e+00 | 0.3487  | -7.2438   | 0.0230    | 0.0011  | 0.1039    | 0.0012  | 0.1039     | 0.0617 | 0.3816    | 0.0692 | 0.3467     | 0.1233 | 0.3599      |
| Adelaide_River (18) v. Clarence_River (74)              | 2394.5540 | 0.5914     | 0e+00 | 0.0160  | -5.3691   | 0.9880    | 0.0011  | 0.1379    | 0.0012  | 0.1379     | 0.0469 | 0.0430    | 0.0529 | 0.0509     | 0.0953 | 0.0460      |
| Adelaide_River (18) v. East_Alligator_River (47)        | 2166.7993 | 0.0450     | 0e+00 | 0.1788  | -7.8315   | 0.1748    | 0.0011  | 0.1558    | 0.0012  | 0.1558     | 0.0734 | 0.3257    | 0.0821 | 0.2977     | 0.1449 | 0.3107      |
| Adelaide_River (18) v. South_Alligator_River (88)       | 2539.1492 | 0.1459     | 0e+00 | 0.3786  | -5.5005   | 0.3846    | 0.0010  | 0.1718    | 0.0011  | 0.1718     | 0.0465 | 0.2607    | 0.0523 | 0.2498     | 0.0945 | 0.2527      |
| Clarence_River (74) v. East_Alligator_River (47)        | 2713.2285 | 0.0330     | 0e+00 | 0.0010  | -4.3753   | 1.0000    | 0.0010  | 0.0310    | 0.0010  | 0.0310     | 0.0199 | 0.0150    | 0.0226 | 0.0150     | 0.0416 | 0.0150      |
| Daly_River (49) v. Sydney_Harbour (65)                  | 2589.7394 | 0.0160     | 0e+00 | 0.0050  | -5.0120   | 0.7043    | 0.0010  | 0.0240    | 0.0010  | 0.0230     | 0.0234 | 0.0320    | 0.0265 | 0.0320     | 0.0487 | 0.0320      |
| Fitzroy_River (3) v. Reunion (28)                       | 1669.1039 | 0.4336     | 1e-04 | 0.4366  | NA        | NA        | 0.0008  | 0.4078    | NA      | NA         | NA     | NA        | NA     | NA         | NA     | NA          |
| Seychelles (36) v. Thailand (4)                         | 1904.6806 | 0.0559     | 1e-04 | 0.1548  | -23.3446  | 0.0151    | 0.0008  | 0.4270    | 0.0009  | 0.4270     | 0.4708 | 0.9899    | 0.4938 | 0.9899     | 0.6558 | 0.9899      |
| South_Alligator_River (88) v. Sri_Lanka (12)            | 2671.5402 | 0.0400     | 0e+00 | 0.2158  | -5.8582   | 0.1209    | 0.0008  | 0.2877    | 0.0008  | 0.2877     | 0.0684 | 0.6833    | 0.0766 | 0.6553     | 0.1357 | 0.6713      |
| Arabian_Sea (15) v. Seychelles (36)                     | 2295.8547 | 0.0010     | 0e+00 | 0.2717  | -8.1978   | 0.0330    | 0.0008  | 0.2747    | 0.0008  | 0.2747     | 0.0928 | 0.7572    | 0.1036 | 0.7303     | 0.1797 | 0.7393      |
| Fitzroy_River (3) v. Sydney_Harbour (65)                | 2180.2845 | 0.2917     | 1e-04 | 0.2547  | NA        | NA        | 0.0007  | 0.4063    | NA      | NA         | NA     | NA        | NA     | NA         | NA     | NA          |
| Adelaide_River (18) v. Sri_Lanka (12)                   | 1703.5383 | 0.2807     | 0e+00 | 0.5115  | -12.3870  | 0.2967    | 0.0007  | 0.3576    | 0.0008  | 0.3576     | 0.1860 | 0.5215    | 0.2035 | 0.5065     | 0.3284 | 0.5115      |
| South_Africa (21) v. South_Alligator_River (88)         | 2690.1292 | 0.0190     | 0e+00 | 0.3367  | -5.1108   | 0.0839    | 0.0007  | 0.2008    | 0.0008  | 0.2008     | 0.0383 | 0.4106    | 0.0432 | 0.3956     | 0.0785 | 0.4016      |
| Sydney_Harbour (65) v. Unknown (10)                     | 2210.5736 | 0.2937     | 1e-04 | 0.0370  | -7.7849   | 0.4006    | 0.0007  | 0.3347    | 0.0008  | 0.3347     | 0.1081 | 0.2498    | 0.1202 | 0.2328     | 0.0661 | 0.2388      |
| Adelaide_River (18) v. Daly_River (49)                  | 2167.7013 | 0.2138     | 0e+00 | 0.0709  | -7.3999   | 0.6933    | 0.0006  | 0.2767    | 0.0007  | 0.2767     | 0.0689 | 0.2448    | 0.0772 | 0.2488     | 0.1367 | 0.2448      |
| East_Alligator_River (47) v. Sri_Lanka (12)             | 2203.9336 | 0.0120     | 0e+00 | 0.5085  | -8.6225   | 0.0440    | 0.0006  | 0.3556    | 0.0006  | 0.3556     | 0.1061 | 0.8601    | 0.1179 | 0.8422     | 0.2025 | 0.8511      |
| Arabian_Sea (15) v. Wenlock_River (24)                  | 2056.0306 | 0.0190     | 0e+00 | 0.2647  | -8.9214   | 0.2517    | 0.0005  | 0.3576    | 0.0005  | 0.3576     | 0.1134 | 0.5295    | 0.1261 | 0.5185     | 0.2151 | 0.5235      |
| Seychelles (36) v. South_Africa (21)                    | 2113.0760 | 0.0360     | 0e+00 | 0.5465  | -7.9629   | 0.2048    | 0.0004  | 0.3117    | 0.0004  | 0.3117     | 0.0733 | 0.5175    | 0.0820 | 0.5085     | 0.1447 | 0.5125      |
| Darwin_Coastal (13) v. South_Africa (21)                | 1878.9222 | 0.0829     | 0e+00 | 0.8452  | -10.3985  | 0.0739    | 0.0004  | 0.4026    | 0.0004  | 0.4026     | 0.1469 | 0.6294    | 0.1623 | 0.6024     | 0.2696 | 0.6144      |
| East_Alligator_River (47) v. Unknown (10)               | 2062.6184 | 0.0599     | 0e+00 | 0.3197  | -9.5133   | 0.1039    | 0.0003  | 0.4056    | 0.0003  | 0.4056     | 0.0573 | 0.4905    | 0.1477 | 0.4525     | 0.2482 | 0.4705      |
| East_Alligator_River (47) v. Sydney_Harbour (65)        | 2454.4485 | 0.2647     | 0e+00 | 0.3347  | -5.3022   | 0.9960    | 0.0001  | 0.3616    | 0.0002  | 0.3616     | 0.0248 | 0.3117    | 0.0280 | 0.3177     | 0.1056 | 0.3157      |
| Papua_New_Guinea (9) v. Thailand (4)                    | 1281.3563 | 0.1409     | 1e-04 | 0.2687  | 80.2821   | 0.0180    | 0.0001  | 0.4555    | 0.0001  | 0.4555     | 0.3270 | 0.9860    | 1.3028 | 0.9860     | 1.1301 | 0.9860      |
| Thailand (4) v. Unknown (10)                            | 1305.2689 | 0.1069     | 1e-04 | 0.2857  | 160.1180  | 0.0415    | 0.0000  | 0.4577    | 0.0000  | 0.4577     | 1.1458 | 0.9615    | 1.1355 | 0.9615     | 1.0631 | 0.9615      |
| Seychelles (36) v. Sri_Lanka (12)                       | 2037.9513 | 0.0330     | 0e+00 | 0.1768  | -9.4906   | 0.1908    | 0.0000  | 0.5165    | 0.0000  | 0.5165     | 0.1221 | 0.8322    | 0.1352 | 0.8222     | 0.2293 | 0.8285      |
| Daly_River (49) v. East_Alligator_River (47)            | 2356.7982 | 0.2807     | 0e+00 | 0.1838  | -5.8189   | 0.8212    | 0.0000  | 0.4835    | 0.0000  | 0.4835     | 0.0305 | 0.4685    | 0.0345 | 0.4705     | 0.0631 | 0.4693      |
| Adelaide_River (18) v. Sydney_Harbour (65)              | 2302.3892 | 0.2438     | 0e+00 | 0.8442  | -6.5338   | 0.6104    | 0.0000  | 0.4945    | 0.0000  | 0.4945     | 0.0573 | 0.5644    | 0.0644 | 0.5704     | 0.1151 | 0.5694      |
| Darwin_Coastal (13) v. Roper_River (9)                  | 1574.5441 | 0.2408     | 1e-04 | 0.1938  | -17.1266  | 0.9411    | 0.0000  | 0.5075    | 0.0000  | 0.5075     | 0.3088 | 0.0819    | 0.3316 | 0.0829     | 0.4893 | 0.0829      |
| East_Alligator_River (47) v. South_Alligator_River (88) | 2557.4033 | 0.4945     | 0e+00 | 0.4216  | -4.5998   | 0.8761    | -0.0001 | 0.5544    | -0.0001 | 0.5544     | 0.0191 | 0.5105    | 0.0216 | 0.5245     | 0.0399 | 0.5155      |
| Clarence_River (74) v. Fitzroy_River (3)                | 2109.1963 | 0.8302     | 2e-04 | 0.0809  | NA        | NA        | -0.0001 | 0.4757    | -0.0001 | 0.4757     | NA     | NA        | NA     | NA         | NA     | NA          |
| Fitzroy_River (3) v. Roper_River (9)                    | 1221.3031 | 0.3287     | 2e-04 | 0.4076  | NA        | NA        | -0.0002 | 0.4633    | -0.0002 | 0.4501     | NA     | NA        | NA     | NA         | NA     | NA          |
| Darwin_Coastal (13) v. Thailand (4)                     | 1455.0609 | 0.3127     | 1e-04 | 0.1688  | -93.7242  | 0.2302    | -0.0002 | 0.4900    | -0.0002 | 0.4900     | 0.8097 | 0.8070    | 0.8213 | 0.8080     | 0.9013 | 0.8080      |
| Daly_River (49) v. South_Africa (21)                    | 2295.0260 | 0.0380     | 0e+00 | 0.5534  | -6.8820   | 0.3167    | -0.0002 | 0.5684    | -0.0002 | 0.5684     | 0.0577 | 0.6154    | 0.0648 | 0.6104     | 0.1158 | 0.6134      |
| South_Africa (21) v. Sri_Lanka (12)                     | 1795.5717 | 0.2657     | 0e+00 | 0.5445  | -11.2577  | 0.4076    | -0.0003 | 0.5365    | -0.0003 | 0.5365     | 0.1632 | 0.6114    | 0.1795 | 0.6054     | 0.2946 | 0.6064      |
| East_Alligator_River (47) v. Thailand (4)               | 2065.5141 | 0.0679     | 1e-04 | 0.5784  | -18.6980  | 0.0181    | -0.0007 | 0.5707    | -0.0007 | 0.5707     | 0.4088 | 0.9879    | 0.4319 | 0.9879     | 0.5967 | 0.9879      |
| Fitzroy_River (3) v. South_Africa (21)                  | 1557.7934 | 0.4975     | 1e-04 | 0.5664  | NA        | NA        | -0.0016 | 0.6127    | NA      | NA         | NA     | NA        | NA     | NA         | NA     | NA          |
| Arabian_Sea (15) v. Sri_Lanka (12)                      | 1725.5932 | 0.6693     | 0e+00 | 0.5984  | -12.0014  | 0.4735    | -0.0017 | 0.8382    | -0.0019 | 0.8382     | 0.1923 | 0.7862    | 0.2104 | 0.7922     | 0.3378 | 0.7902      |
| Adelaide_River (18) v. Thailand (4)                     | 1511.7822 | 0.3177     | 1e-04 | 0.7493  | -54.5834  | 0.0431    | -0.0018 | 0.6240    | -0.0019 | 0.6240     | 0.6965 | 0.9709    | 0.7131 | 0.9709     | 0.8309 | 0.9709      |
| Arabian_Sea (15) v. Fitzroy_River (3)                   | 1390.8797 | 0.8531     | 1e-04 | 0.2388  | NA        | NA        | -0.0021 | 0.6133    | -0.0023 | 0.6133     | NA     | NA        | NA     | NA         | NA     | NA          |
| South_Alligator_River (88) v. Thailand (4)              | 2650.8199 | 0.0519     | 1e-04 | 0.7502  | -9.5226   | 0.0245    | -0.0023 | 0.6957    | -0.0024 | 0.6957     | 0.2525 | 0.9949    | 0.2732 | 0.9949     | 0.4197 | 0.9949      |
| Roper_River (9) v. Trinity_inlet (4)                    | 1320.9973 | 0.1029     | 1e-04 | 0.8222  | 80.2456   | 0.0721    | -0.0023 | 0.6373    | -0.0025 | 0.6333     | 1.3145 | 0.9540    | 1.2904 | 0.9540     | 1.1255 | 0.9540      |
| Clarence_River (74) v. Thailand (4)                     | 2461.8605 | 0.1998     | 1e-04 | 0.6374  | -9.2000   | 0.2889    | -0.0023 | 0.6767    | -0.0025 | 0.6767     | 0.2478 | 0.9030    | 0.2688 | 0.9111     | 0.4140 | 0.9061      |
| Daly_River (49) v. Thailand (4)                         | 2171.0507 | 0.0320     | 1e-04 | 0.5914  | -16.2078  | 0.0374    | -0.0023 | 0.7180    | -0.0025 | 0.7180     | 0.3737 | 0.9838    | 0.3970 | 0.9848     | 0.5610 | 0.9838      |
| Thailand (4) v. Wenlock_River (24)                      | 1746.8600 | 0.2418     | 1e-04 | 0.4366  | -29.7036  | 0.0594    | -0.0024 | 0.6727    | -0.0026 | 0.6754     | 0.5430 | 0.9638    | 0.5648 | 0.9658     | 0.7180 | 0.9658      |
| Fitzroy_River (3) v. Wenlock_River (24)                 | 1498.1683 | 0.8242     | 1e-04 | 0.2368  | NA        | NA        | -0.0031 | 0.6519    | NA      | NA         | NA     | NA        | NA     | NA         | NA     | NA          |
| Reunion (28) v. Thailand (4)                            | 1844.1871 | 0.0529     | 1e-04 | 0.4715  | -28.9871  | 0.0062    | -0.0032 | 0.6958    | -0.0034 | 0.6948     | 0.5317 | 0.9969    | 0.5535 | 0.9969     | 0.7085 | 0.9969      |
| Sydney_Harbour (65) v. Thailand (4)                     | 2327.3946 | 0.0579     | 1e-04 | 0.8611  | -12.8716  | 0.0262    | -0.0041 | 0.8739    | -0.0044 | 0.8739     | 0.3168 | 0.9939    | 0.3392 | 0.9960     | 0.4982 | 0.9960      |
| Adelaide_River (18) v. Fitzroy_River (3)                | 1369.5109 | 0.8232     | 1e-04 | 0.5584  | NA        | NA        | -0.0047 | 0.7308    | -0.0051 | 0.7318     | NA     | NA        | NA     | NA         | NA     | NA          |
| Sri_Lanka (12) v. Thailand (4)                          | 1356.9701 | 0.5075     | 1e-04 | 0.8801  | -256.1097 | 0.1510    | -0.0050 | 0.8621    | -0.0054 | 0.8621     | 0.9218 | 0.8620    | 0.9268 | 0.8630     | 0.9619 | 0.8630      |
| South_Africa (21) v. Thailand (4)                       | 1572.0260 | 0.5405     | 1e-04 | 0.5285  | -38.5533  | 0.0212    | -0.0072 | 0.9679    | -0.0078 | 0.9679     | 0.6106 | 0.9889    | 0.6304 | 0.9909     | 0.7705 | 0.9889      |
| Roper_River (9) v. Thailand (4)                         | 1261.5201 | 0.4156     | 1e-04 | 0.7303  | 81.4655   | 0.0153    | -0.0074 | 0.8831    | -0.0080 | 0.8831     | 1.3158 | 0.9878    | 1.2921 | 0.9878     | 1.1261 | 0.9878      |

Table 46: Pairwise Fst for 3416 DArTcap loci between the IWP sites (*continued*)

|                                         | Chi2      | Chi2.p.val | D     | D.p.val | Fis      | Fis.p.val | Fst     | Fst.p.val | F'st    | F'st.p.val | Gst    | Gst.p.val | G'st   | G'st.p.val | G''st  | G''st.p.val |
|-----------------------------------------|-----------|------------|-------|---------|----------|-----------|---------|-----------|---------|------------|--------|-----------|--------|------------|--------|-------------|
| Arabian_Sea (15) v. Thailand (4)        | 1433.1283 | 0.9071     | 1e-04 | 0.7912  | -54.8151 | 0.1910    | -0.0079 | 0.9750    | -0.0085 | 0.9750     | 0.7041 | 0.8640    | 0.7207 | 0.8670     | 0.8361 | 0.8666      |
| Mozambique (11) v. Thailand (4)         | 1247.1550 | 0.8891     | 1e-04 | 0.9630  | 157.8144 | 0.0075    | -0.0084 | 0.9346    | -0.0091 | 0.9281     | 1.1490 | 0.9938    | 1.1385 | 0.9938     | 1.0645 | 0.9938      |
| Fitzroy_River (3) v. Mozambique (11)    | 1230.1591 | 0.7792     | 1e-04 | 0.9800  | NA       | NA        | -0.0097 | 0.8419    | NA      | NA         | NA     | NA        | NA     | NA         | NA     | NA          |
| Fitzroy_River (3) v. Seychelles (36)    | 1808.8073 | 0.1868     | 1e-04 | 0.1908  | NA       | NA        | NA      | NA        | NA      | NA         | NA     | NA        | NA     | NA         | NA     | NA          |
| Fitzroy_River (3) v. Towns_River (10)   | 1249.3455 | 0.2168     | 2e-04 | 0.2737  | NA       | NA        | NA      | NA        | NA      | NA         | NA     | NA        | NA     | NA         | NA     | NA          |
| Fitzroy_River (3) v. Unknown (10)       | 1211.0390 | 0.4166     | 2e-04 | 0.2687  | NA       | NA        | NA      | NA        | NA      | NA         | NA     | NA        | NA     | NA         | NA     | NA          |
| Fitzroy_River (3) v. Urauchi_River (35) | 2817.7795 | 0.0010     | 3e-04 | 0.0060  | NA       | NA        | NA      | NA        | NA      | NA         | NA     | NA        | NA     | NA         | NA     | NA          |

## 11.8 PCA

```
pca1 <- adegenet::glPca(BS.dartcap.IWP.gl, nf = 5, parallel = TRUE,
                        n.cores = parallel::detectCores() - 1)
save(pca1, file = "DARtcap_IWP_PCA.Rdata")
```

```
load("DARtcap_IWP_PCA.Rdata")
```

```
BS.pca.scores <- as.data.frame(pca1$scores)
BS.pca.scores$pop <- pop(BS.dartcap.IWP.gl)
cols <- adegenet::funky(nPop(BS.dartcap.IWP.gl))
```

```
p <-
ggplot2::ggplot(BS.pca.scores, ggplot2::aes(x = PC1, y = PC2, colour = pop)) +
ggplot2::geom_point(size = 2) + ggplot2::scale_color_manual(values = cols) +
ggplot2::geom_hline(yintercept = 0) + ggplot2::geom_vline(xintercept = 0) +
ggplot2::theme_minimal() +
ggplot2::theme(
  axis.text = ggplot2::element_text(size = 5),
  axis.title.x = ggplot2::element_text(size = 10),
  axis.title.y = ggplot2::element_text(size = 10),
  legend.text = ggplot2::element_text(size = 7)
)
p
```

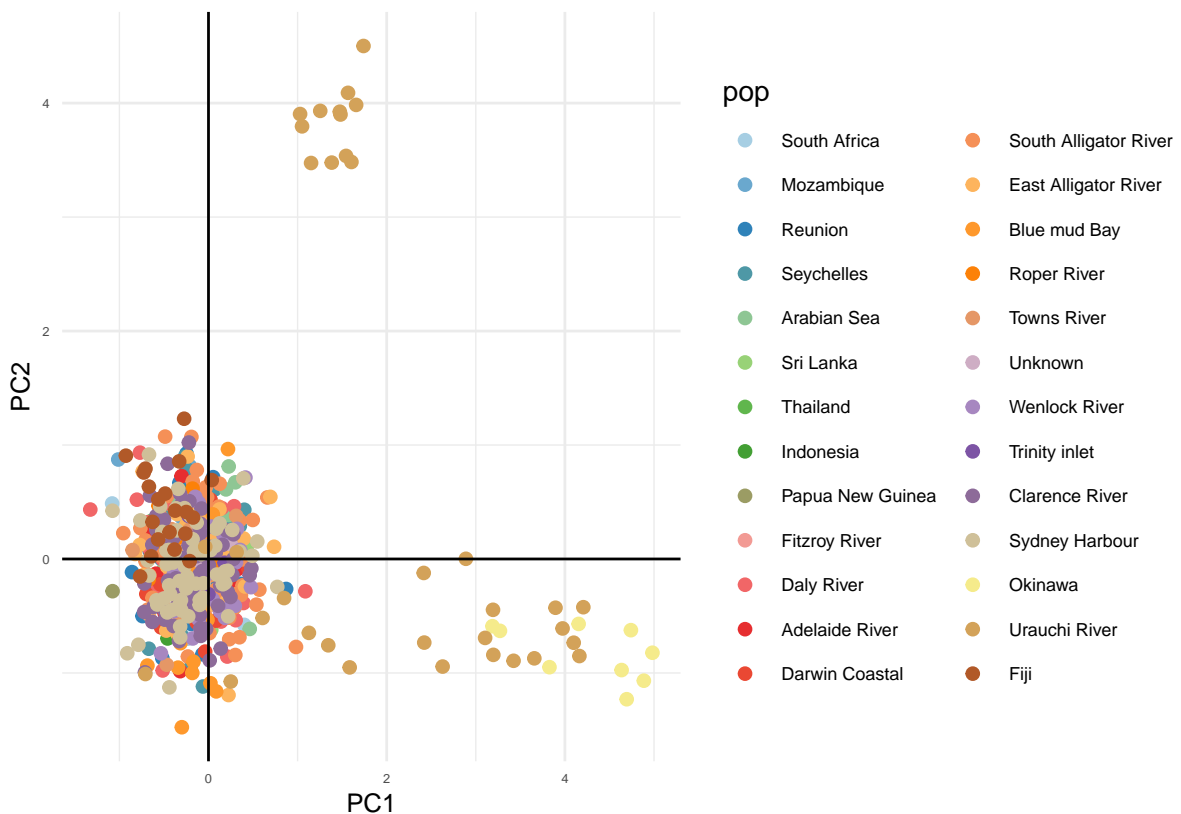

```
ggplot2::ggsave(p, filename = "DARtcap_IWP_PCA1.png", width = 30,
                 height = 15, units = "cm")
```

```
p <-
ggplot2::ggplot(BS.pca.scores, ggplot2::aes(x = PC1, y = PC3, colour = pop)) +
```

```

ggplot2::geom_point(size = 2) + ggplot2::scale_color_manual(values = cols) +
ggplot2::geom_hline(yintercept = 0) + ggplot2::geom_vline(xintercept = 0) +
ggplot2::theme_minimal() +
ggplot2::theme(
  axis.text = ggplot2::element_text(size = 5),
  axis.title.x = ggplot2::element_text(size = 10),
  axis.title.y = ggplot2::element_text(size = 10),
  legend.text = ggplot2::element_text(size = 7)
)

```

p

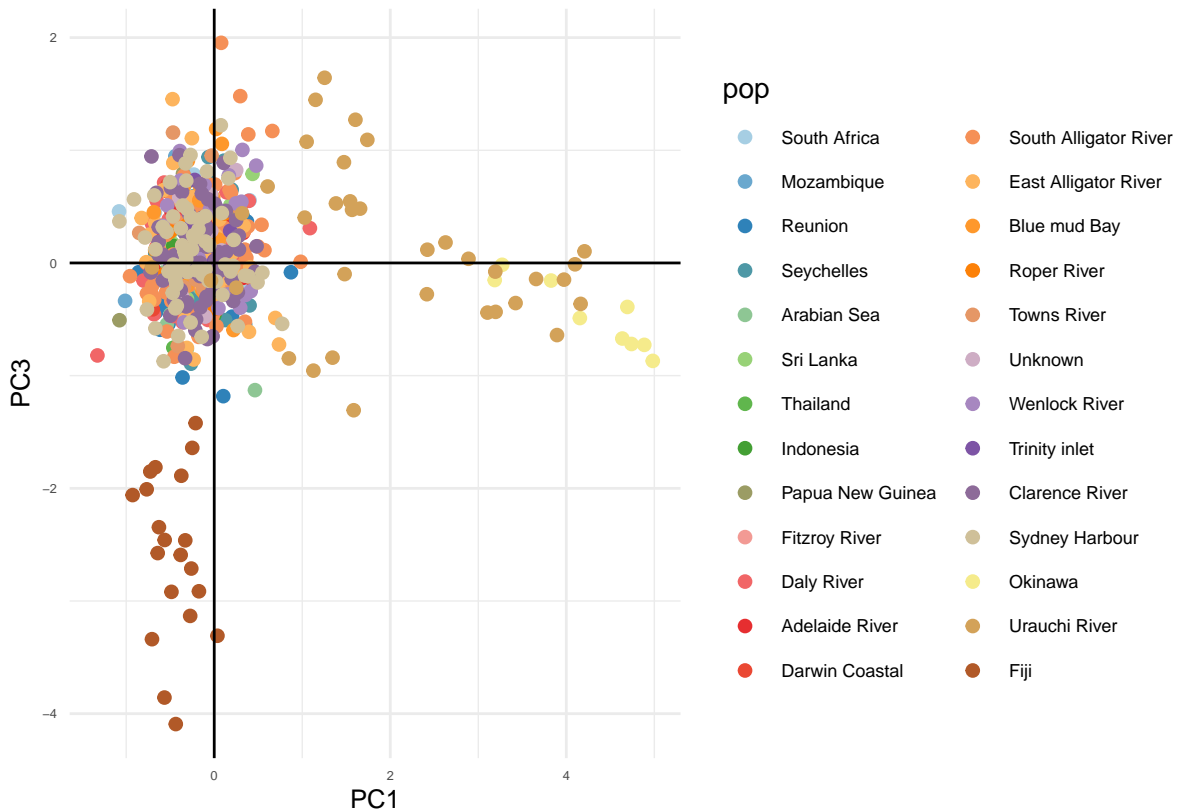

```

ggplot2::ggsave(p, filename = "DArTcap_IWP_PCA2.png", width = 30,
  height = 15,units = "cm")

```

```

p <-
ggplot2::ggplot(BS.pca.scores, ggplot2::aes(x = PC2, y = PC3, colour = pop)) +
ggplot2::geom_point(size = 2) + ggplot2::scale_color_manual(values = cols) +
ggplot2::geom_hline(yintercept = 0) + ggplot2::geom_vline(xintercept = 0) +
ggplot2::theme_minimal() +
ggplot2::theme(
  axis.text = ggplot2::element_text(size = 5),
  axis.title.x = ggplot2::element_text(size = 10),
  axis.title.y = ggplot2::element_text(size = 10),
  legend.text = ggplot2::element_text(size = 7)
)

```

p

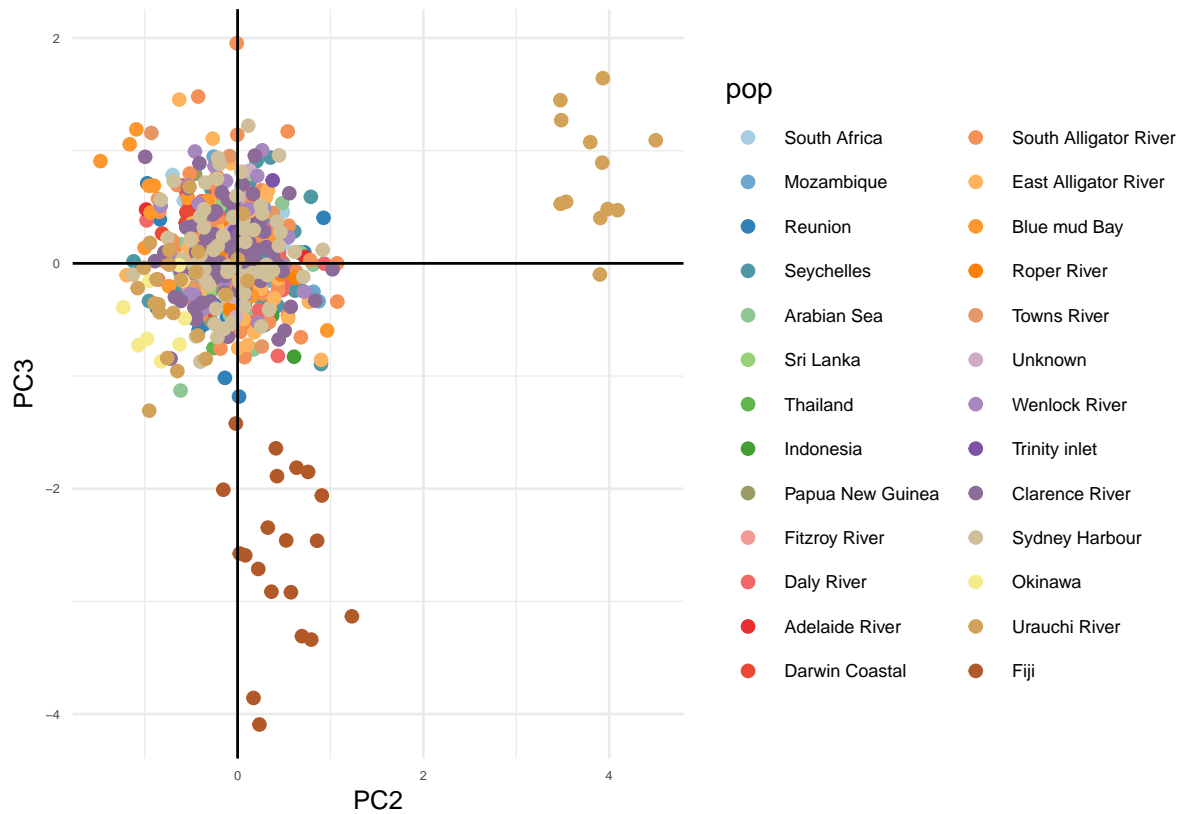

```
ggplot2::ggsave(p, filename = "DArTcap_IWP_PCA3.png", width = 30,
  height = 15, units = "cm")
```

```
p <-
ggplot2::ggplot(BS.pca.scores, ggplot2::aes(x = PC3, y = PC4, colour = pop)) +
ggplot2::geom_point(size = 2) + ggplot2::scale_color_manual(values = cols) +
ggplot2::geom_hline(yintercept = 0) + ggplot2::geom_vline(xintercept = 0) +
ggplot2::theme_minimal() +
ggplot2::theme(
  axis.text = ggplot2::element_text(size = 5),
  axis.title.x = ggplot2::element_text(size = 10),
  axis.title.y = ggplot2::element_text(size = 10),
  legend.text = ggplot2::element_text(size = 7)
)
p
```

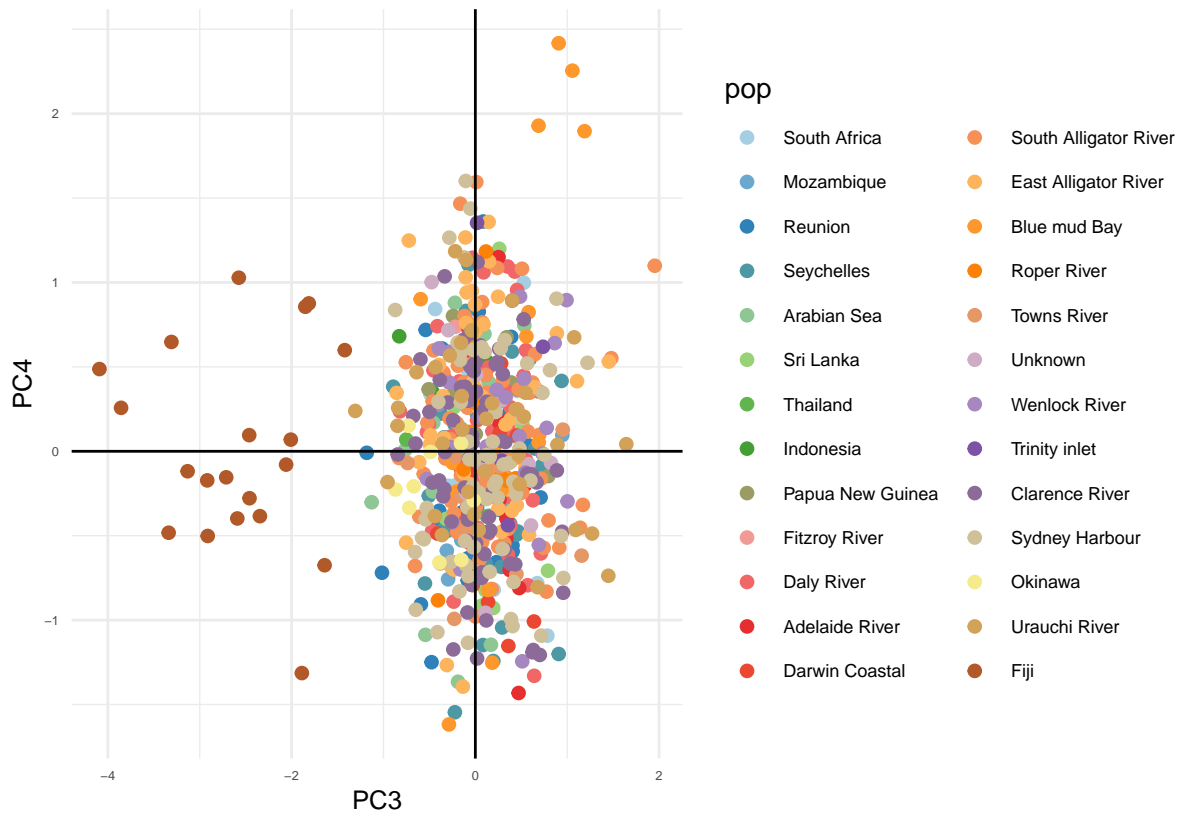

```
ggplot2::ggsave(p, filename = "DArTcap_IWP_PCA4.png", width = 30,
               height = 15, units = "cm")

p <-
ggplot2::ggplot(BS.pca.scores, ggplot2::aes(x = PC3, y = PC5, colour = pop)) +
ggplot2::geom_point(size = 2) + ggplot2::scale_color_manual(values = cols) +
ggplot2::geom_hline(yintercept = 0) + ggplot2::geom_vline(xintercept = 0) +
ggplot2::theme_minimal() +
ggplot2::theme(
  axis.text = ggplot2::element_text(size = 5),
  axis.title.x = ggplot2::element_text(size = 10),
  axis.title.y = ggplot2::element_text(size = 10),
  legend.text = ggplot2::element_text(size = 7)
)
p
```

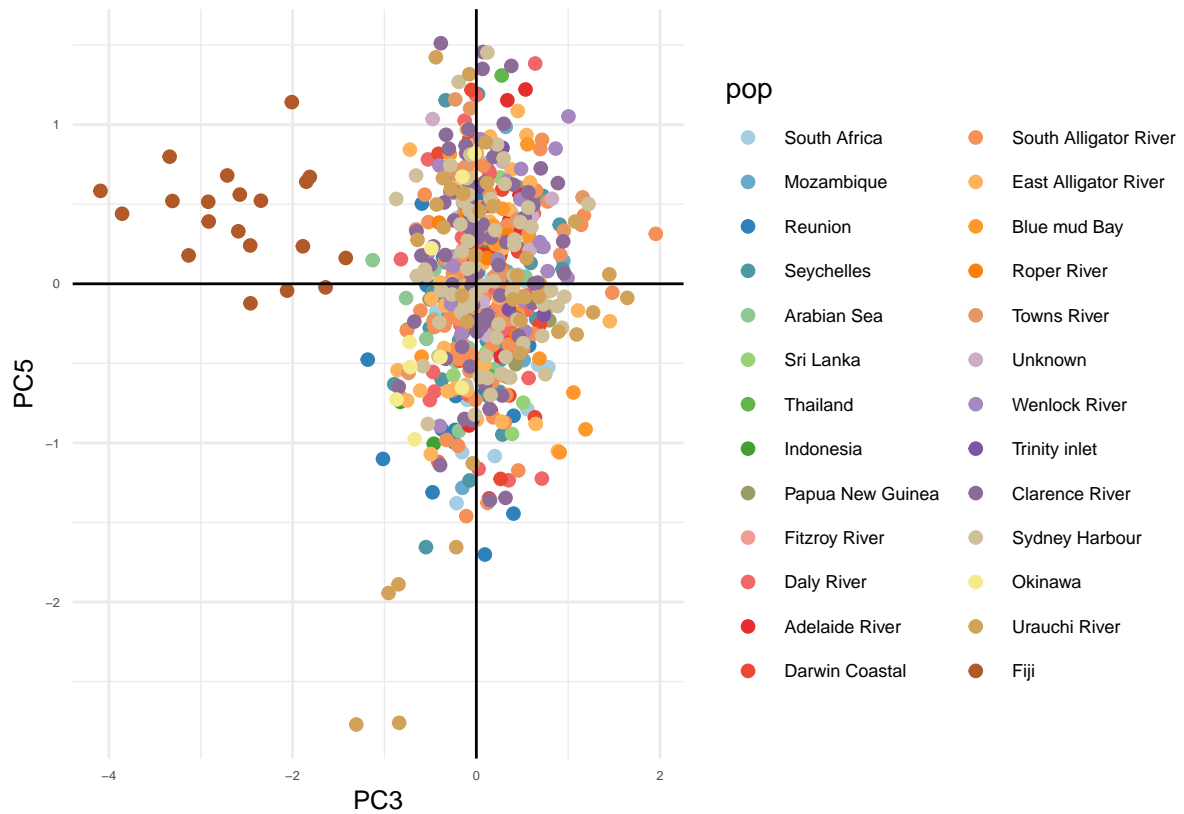

```
ggplot2::ggsave(p, filename = "DArTcap_IWP_PCA5.png", width = 30,
                height = 15, units = "cm")
```

## 11.9 DAPC

### 11.9.1 Optimal number of clusters with neutral markers

```
set.seed(124)
grp <-
  adegenet::find.clusters(
    BS.dartcap.IWP.gl,
    max.n.clust = 26,
    n.pca = adegenet::nInd(BS.dartcap.IWP.gl) / 3,
    stat = "BIC",
    parallel = TRUE,
    n.cores = parallel::detectCores() - 1
  )
```

```
save(grp, file = "DArTcap_IWP_grp.Rdata")
```

```
load("DArTcap_IWP_grp.Rdata")
```

```
y <- as.numeric(grp$Kstat)
x <- 1:26
data <- data.frame(x,y,stringsAsFactors = F)
plot <- ggplot2::ggplot(data, ggplot2::aes(x,y)) +
  ggplot2::geom_point(size = 5, shape = 1, color = "blue") +
  ggplot2::geom_line(size = 1,color = "blue") +
  ggplot2::scale_x_continuous(name = waiver(),
                             breaks = seq(from = 0,
                                           to = nrow(BS.dartcap.IWP.gl) - 1,
```



```

                                by = 1)) +
ggplot2::labs(subtitle = "",
              y = "Bayesian Information Criterion",
              x = "Number of clusters",
              title = "",
              caption = "") +
ggplot2::theme_classic() +
ggplot2::theme(
  axis.text = ggplot2::element_text(size = 5),
  axis.title.x = ggplot2::element_text(size = 20,vjust = 0, hjust = 0.5),
  axis.title.y = ggplot2::element_text(size = 20,vjust = 2, hjust = 0.5))
print(plot)

```

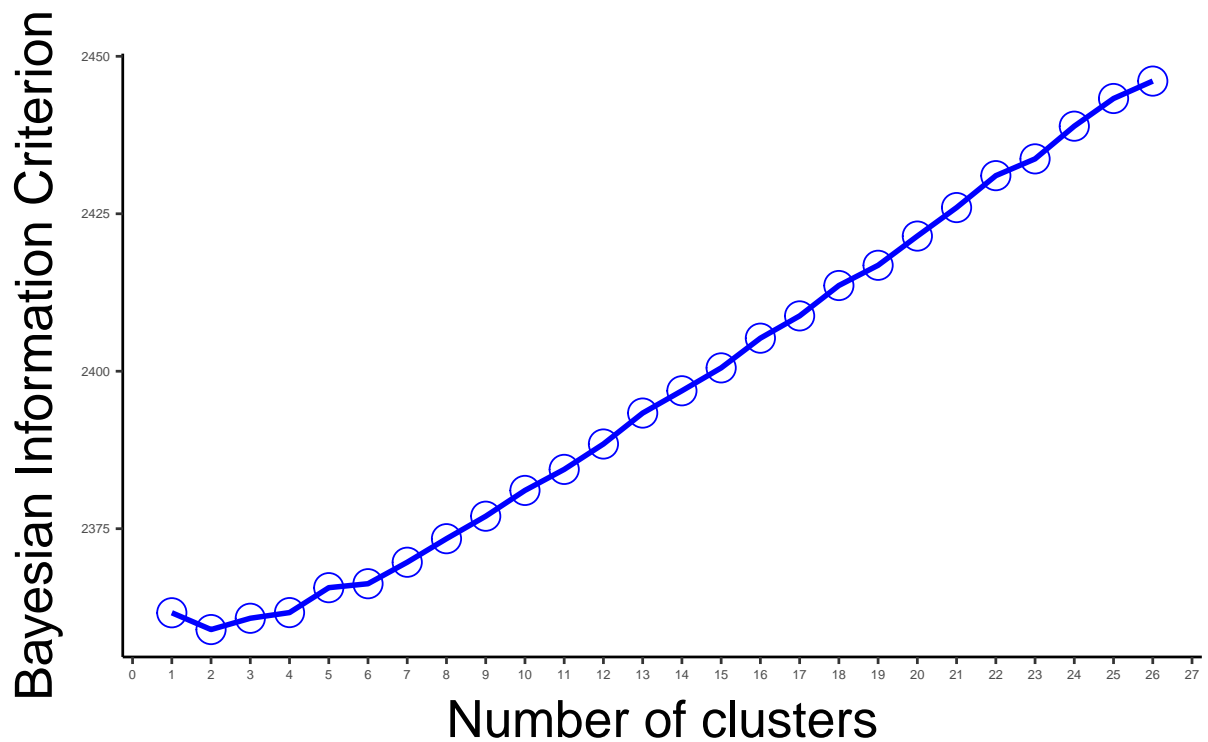

```

ggplot2::ggsave(plot, filename = "DArTcap_IWP_grp.png", width = 30,
                 height = 15,units = "cm")

```

### 11.9.2 Cross-validation to identify the optimal number of PCs

Uses a training - holdout set of individuals to check how reliable individuals can be assigned.

```

set.seed(124)
x <- BS.dartcap.IWP.g1

xval <-
  adegenet::xvalDapc(
    tab(x, NA.method = "mean"),
    adegenet::pop(x),
    n.pca = seq(1, adegenet::nInd(x), by = 50),
    training.set = 0.9,
    result = "groupMean",
    center = TRUE,
    scale = FALSE,

```

```

n.rep = 1000,
parallel = "multicore",
ncpus = 1,
xval.plot = TRUE
)
print(xval[2:6])
PC <- as.numeric(xval$`Number of PCs Achieving Lowest MSE`)

#refine the analysis
set.seed(124)
png(file="DArTcap_IWP_xval.png")
xval <-
  adegenet::xvalDapc(
    tab(x, NA.method = "mean"),
    adegenet::pop(x),
    n.pca = (PC - 15):(PC + 15),
    n.rep = 1000,
    parallel = "multicore",
    ncpus = 1,
    xval.plot = TRUE
  )
dev.off()
save(xval, file = "DArTcap_IWP_xval.rdata")

load("DArTcap_IWP_xval.rdata")
print(xval[2:6])
PC <- as.numeric(xval$`Number of PCs Achieving Lowest MSE`)

## $`Median and Confidence Interval for Random Chance`
##      2.5%      50%      97.5%
## 0.02438735 0.03734027 0.05508623
##
## $`Mean Successful Assignment by Number of PCs of PCA`
##      186      187      188      189      190      191      192      193
## 0.2324804 0.2306034 0.2321176 0.2329844 0.2300221 0.2284677 0.2318179 0.2328035
##      194      195      196      197      198      199      200      201
## 0.2288689 0.2310550 0.2324531 0.2295151 0.2295611 0.2286921 0.2269646 0.2322773
##      202      203      204      205      206      207      208      209
## 0.2295792 0.2298527 0.2290045 0.2298239 0.2280632 0.2260452 0.2277085 0.2286509
##      210      211      212      213      214      215      216
## 0.2277546 0.2264222 0.2281876 0.2280022 0.2292683 0.2289469 0.2295428
##
## $`Number of PCs Achieving Highest Mean Success`
## [1] "189"
##
## $`Root Mean Squared Error by Number of PCs of PCA`
##      186      187      188      189      190      191      192      193
## 0.7680637 0.7699528 0.7684520 0.7675715 0.7705111 0.7721376 0.7687126 0.7677602
##      194      195      196      197      198      199      200      201
## 0.7716703 0.7695454 0.7680836 0.7710186 0.7710227 0.7718648 0.7735771 0.7682334
##      202      203      204      205      206      207      208      209
## 0.7709948 0.7707494 0.7715608 0.7706960 0.7724861 0.7745113 0.7728612 0.7719175
##      210      211      212      213      214      215      216
## 0.7728060 0.7741488 0.7723893 0.7725922 0.7712791 0.7716179 0.7710302
##
## $`Number of PCs Achieving Lowest MSE`
## [1] "189"

```

```
dapc.all.object.names <- c()
for (K in 2:10) {
  set.seed(124)
  grp <- adegenet::find.clusters(BS.dartcap.IWP.gl, n.clust = K, n.pca = PC)
  set.seed(124)
  dapc.all.neutral <- adegenet::dapc(BS.dartcap.IWP.gl, grp$grp, n.da = K - 1,
    n.pca = PC)
  assign(paste0("dapc.all.", K), value = dapc.all.neutral)
  dapc.all.object.names <- c(dapc.all.object.names,
    paste0("dapc.all.", K))
}
save(list = dapc.all.object.names, dapc.all.object.names,
  file = "DARtcap_IWP_DAPC.Rdata")
```

### 11.9.3 DAPC barplot

Group individuals according to DAPC posterior membership.

```
load("DARtcap_IWP_DAPC.Rdata")
for (K in 2:10) {
  colour <- colours.prior[1:K]
  dapc <- get(dapc.all.object.names[K - 1])
  post <- as.matrix(dapc$posterior)
  colnames(post) <- paste0("Group", 1:nlevels(dapc$grp))
  locations <- BS.dartcap.IWP.gl$pop

  plot.dapc.FDD(x = post,
    locations = locations,
    colour = colour,
    region.lwd = 1,
    plotTitle = paste0("DAPC: all Bull Sharks - subset Australia\n for K=",
      K, " & PC=", PC, sep = ""))

  dev.print(
    device = png,
    file = paste0("DARtcap_IWP_DAPC_barplot_K", K, ".png"),
    res = 300,
    width = 30,
    height = 15,
    units = "cm")
}
```

## DAPC: all Bull Sharks – subset Australia for K=2 & PC=189

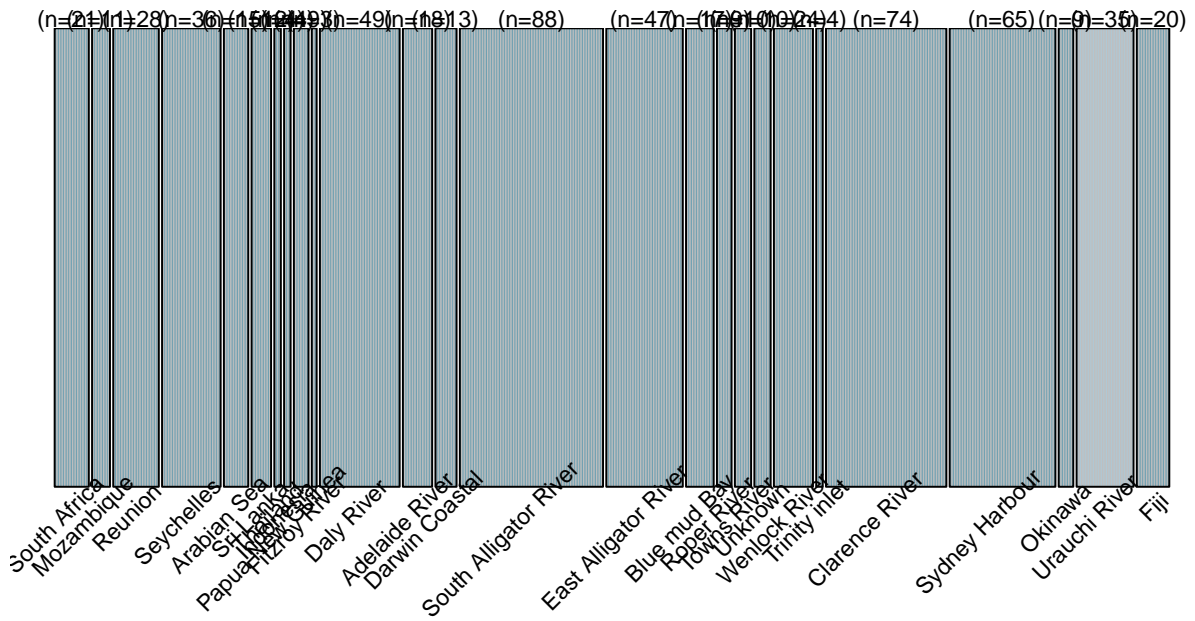

## DAPC: all Bull Sharks – subset Australia for K=3 & PC=189

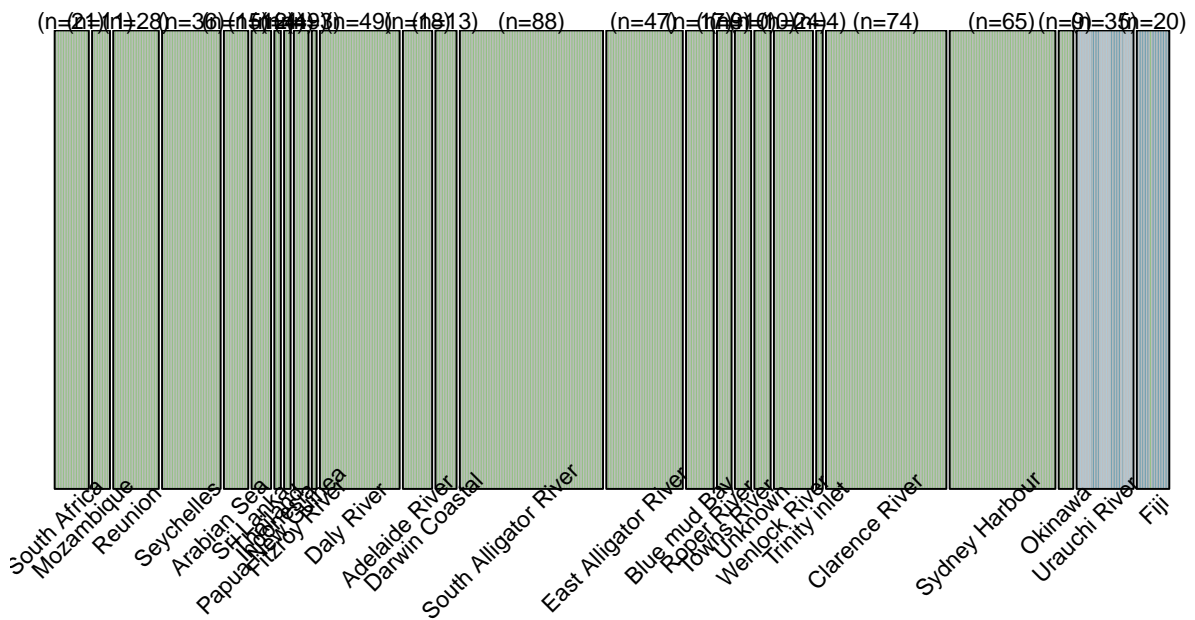

## DAPC: all Bull Sharks – subset Australia for K=4 & PC=189

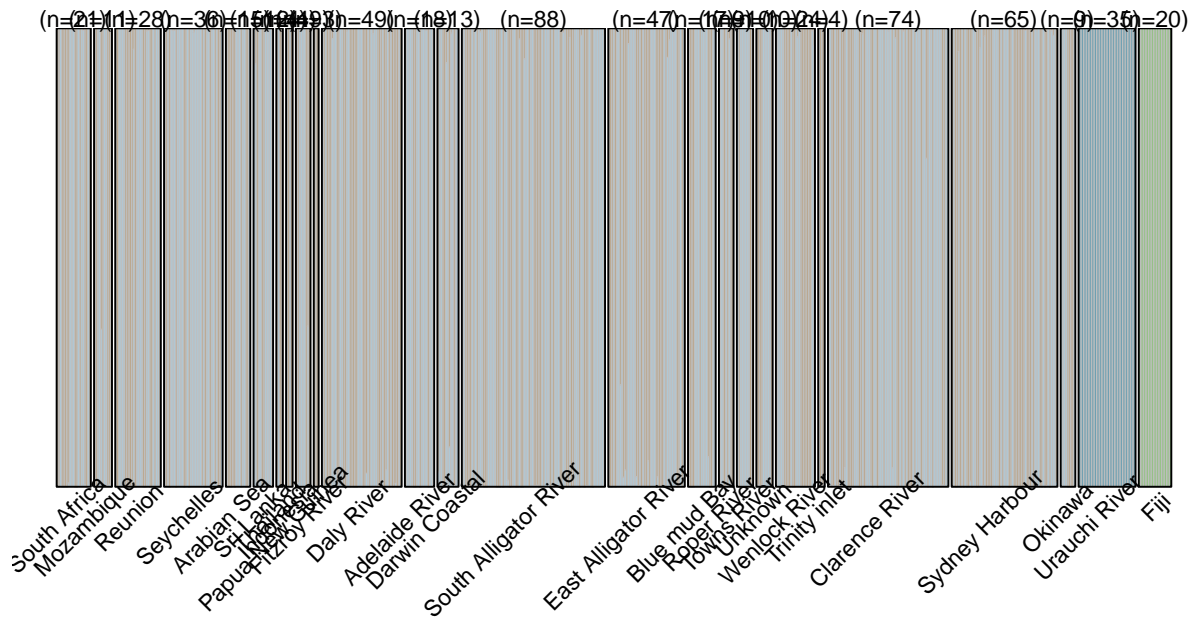

## DAPC: all Bull Sharks – subset Australia for K=5 & PC=189

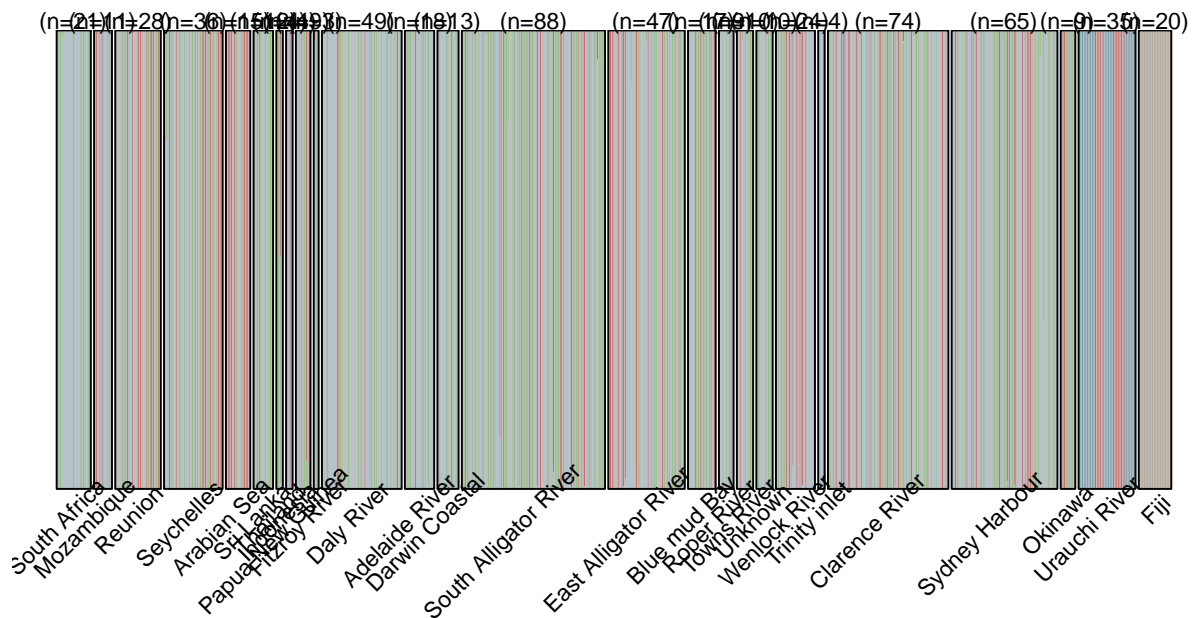

## DAPC: all Bull Sharks – subset Australia for K=6 & PC=189

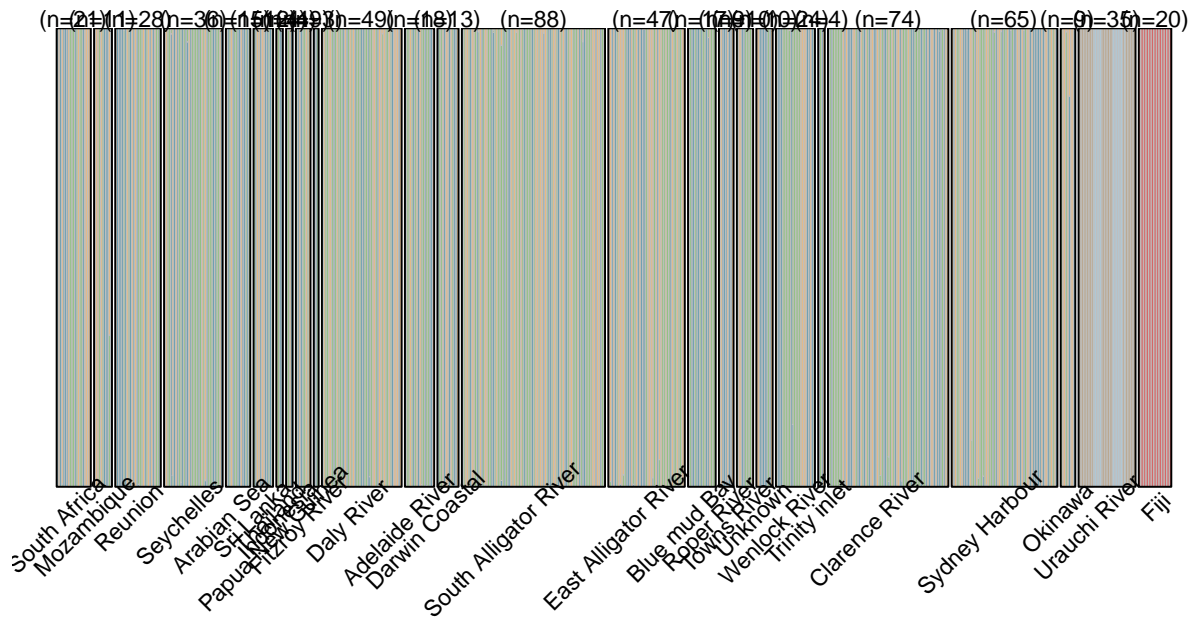

## DAPC: all Bull Sharks – subset Australia for K=7 & PC=189

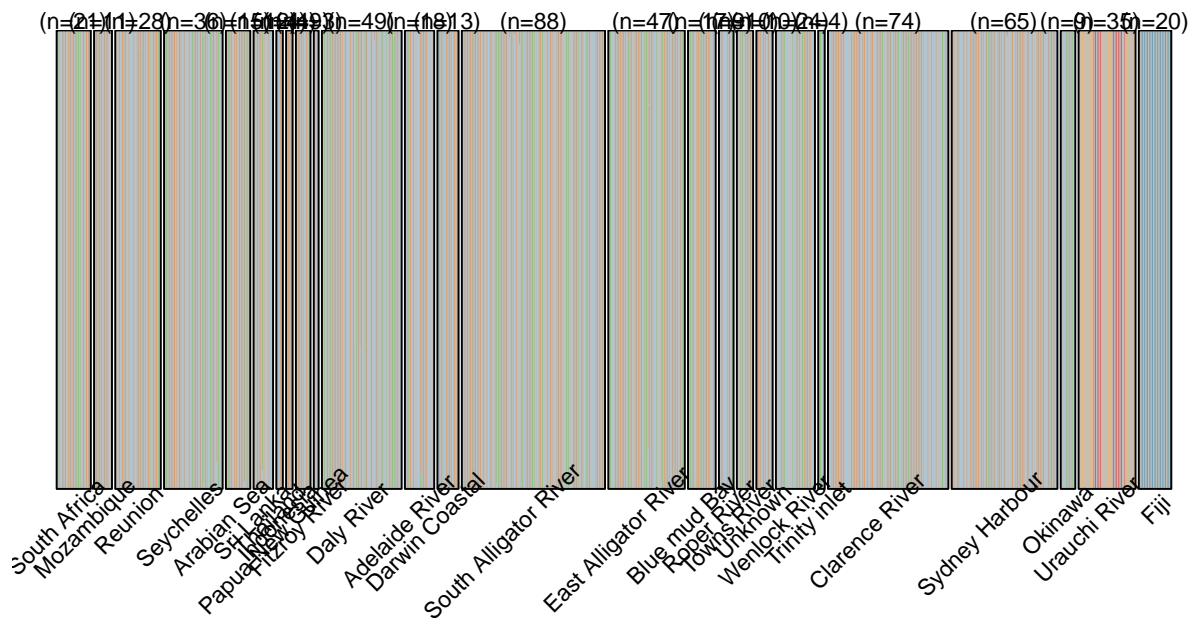

## DAPC: all Bull Sharks – subset Australia for K=8 & PC=189

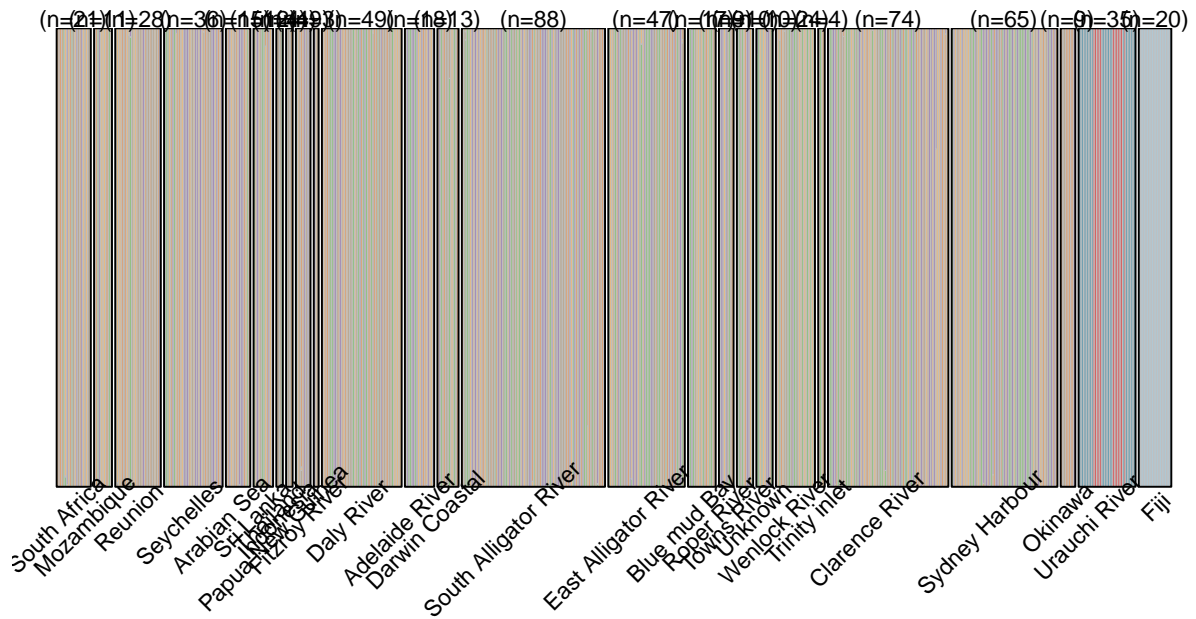

## DAPC: all Bull Sharks – subset Australia for K=9 & PC=189

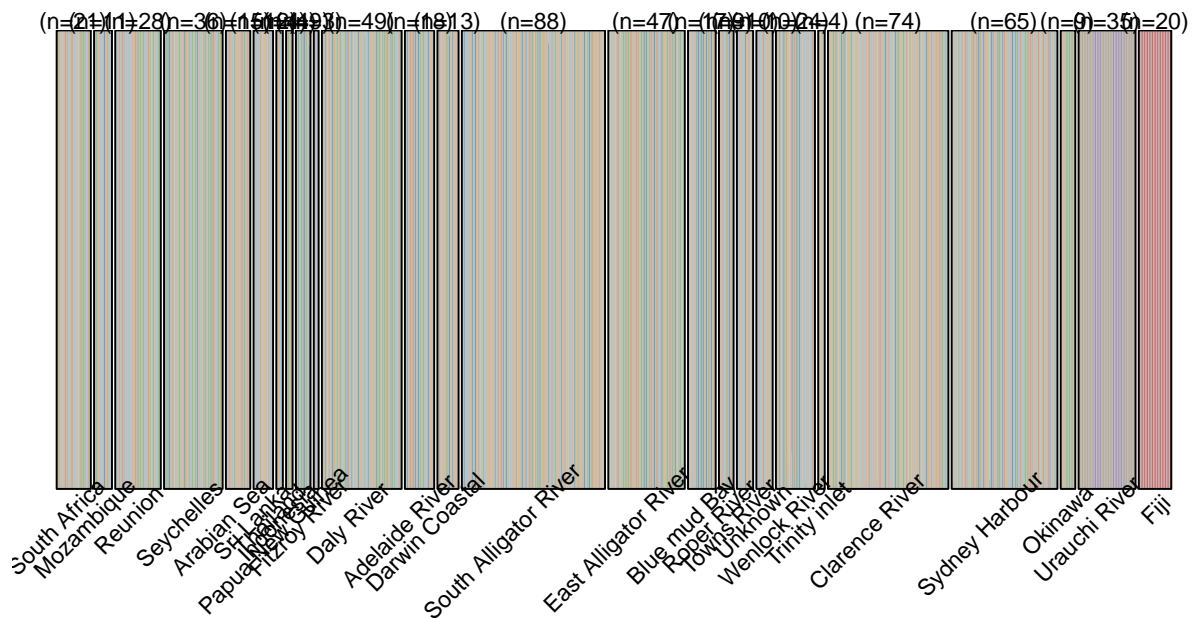

# DAPC: all Bull Sharks – subset Australia for K=10 & PC=189

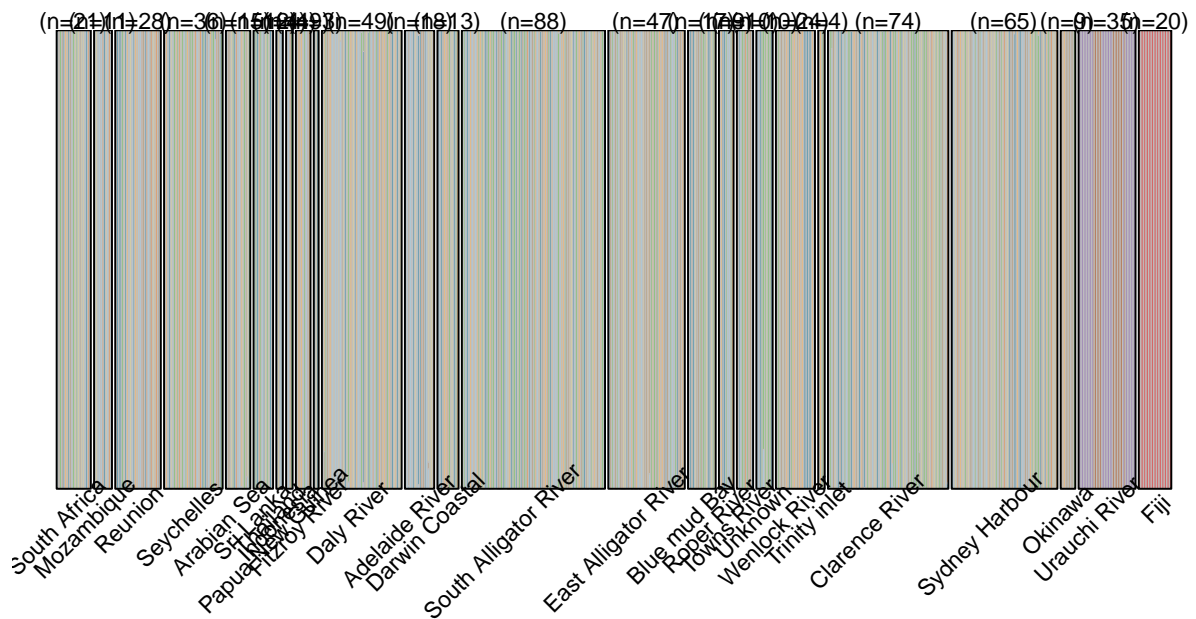

## 11.9.4 DAPC scatterplot

```
load("DArTcap_IWP_DAPC.Rdata")

for (K in 3:10) {
  dapc <- get(dapc.all.object.names[K - 1])
  if (K == 2) {
    posi.leg <- "bottomright"
  } else {posi.leg <- "bottomleft"}
  dapc.plot <- ade4::scatter(dapc, grp = pop(BS.dartcap.IWP.gl), cex = 2,
    legend = TRUE, col = colours.26, clabel = FALSE,
    posi.leg = posi.leg, scree.pca = FALSE,
    posi.pca = "topleft", cleg = 0.5, xax = 1,
    yax = 2, inset.solid = 0.3)

  dev.print(
    device = png,
    file = paste0("DArTcap_IWP_DAPC_scatterplot_K", K, ".png"),
    width = 30,
    height = 15,
    units = "cm",
    res = 300
  )
}
```



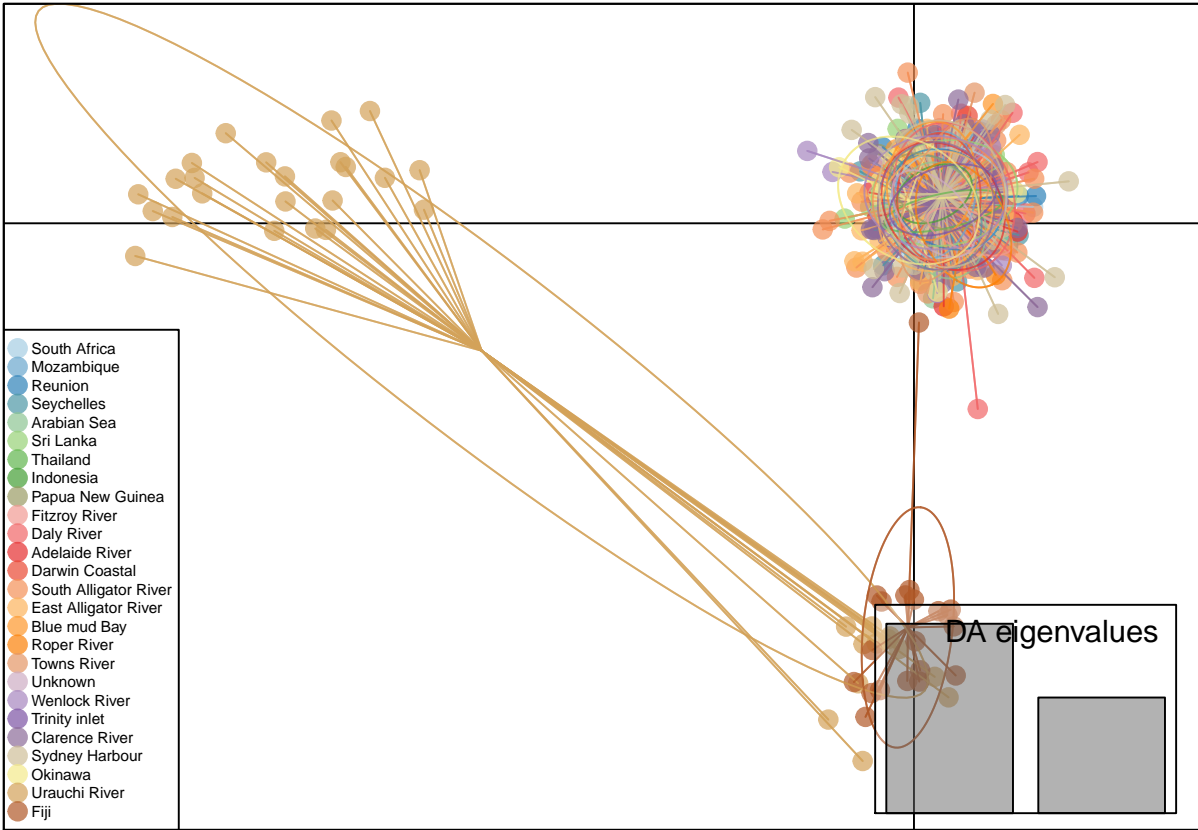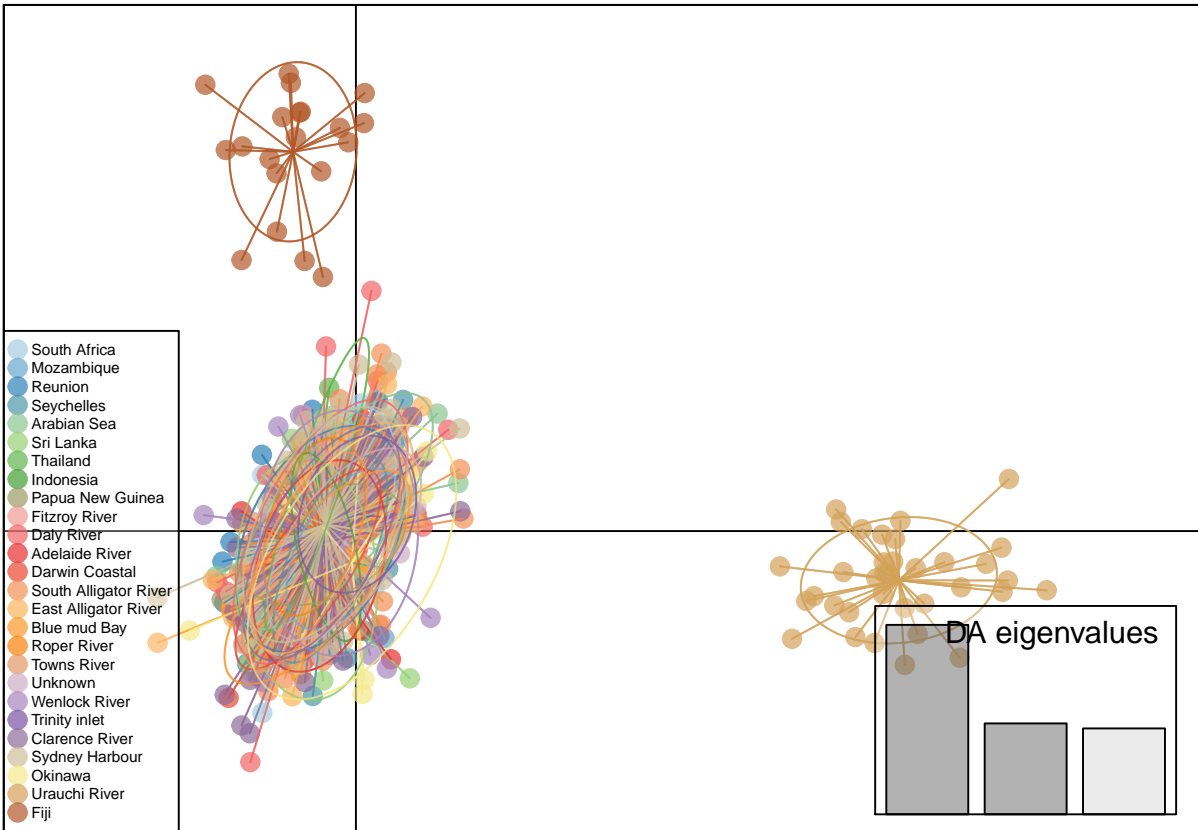

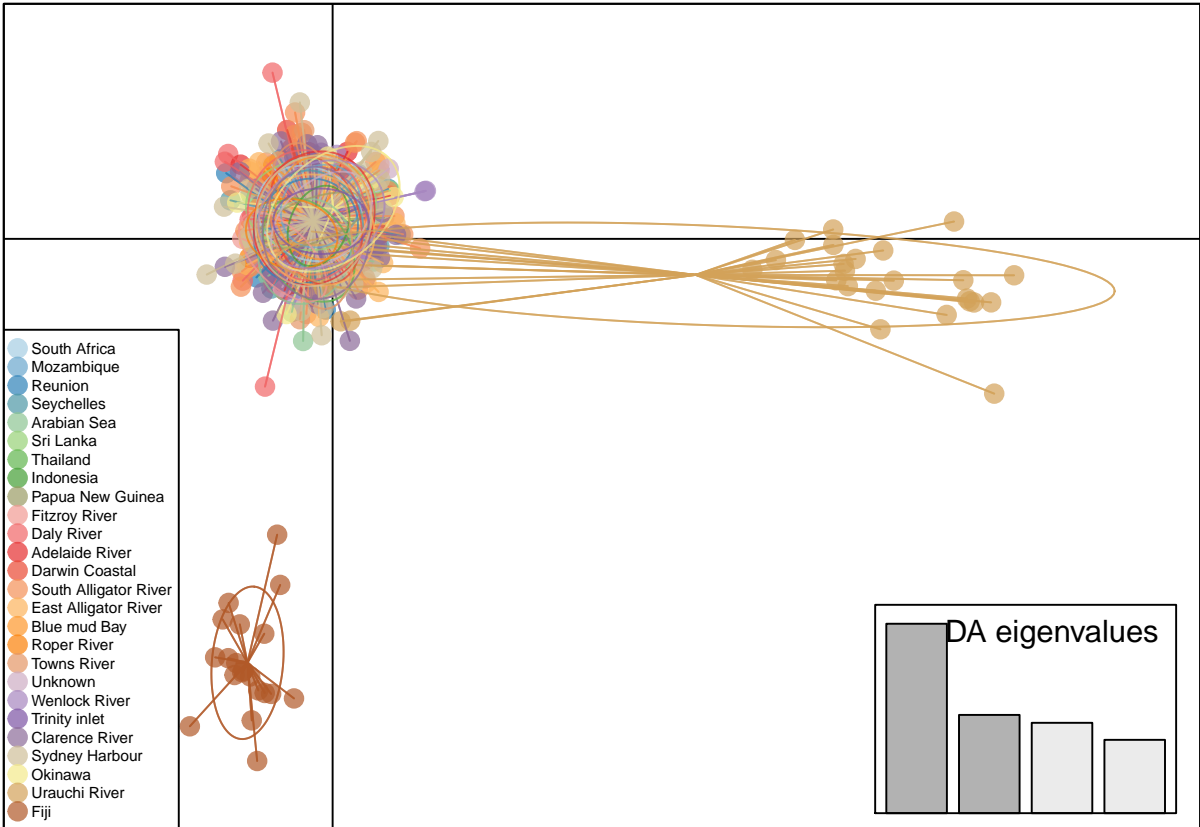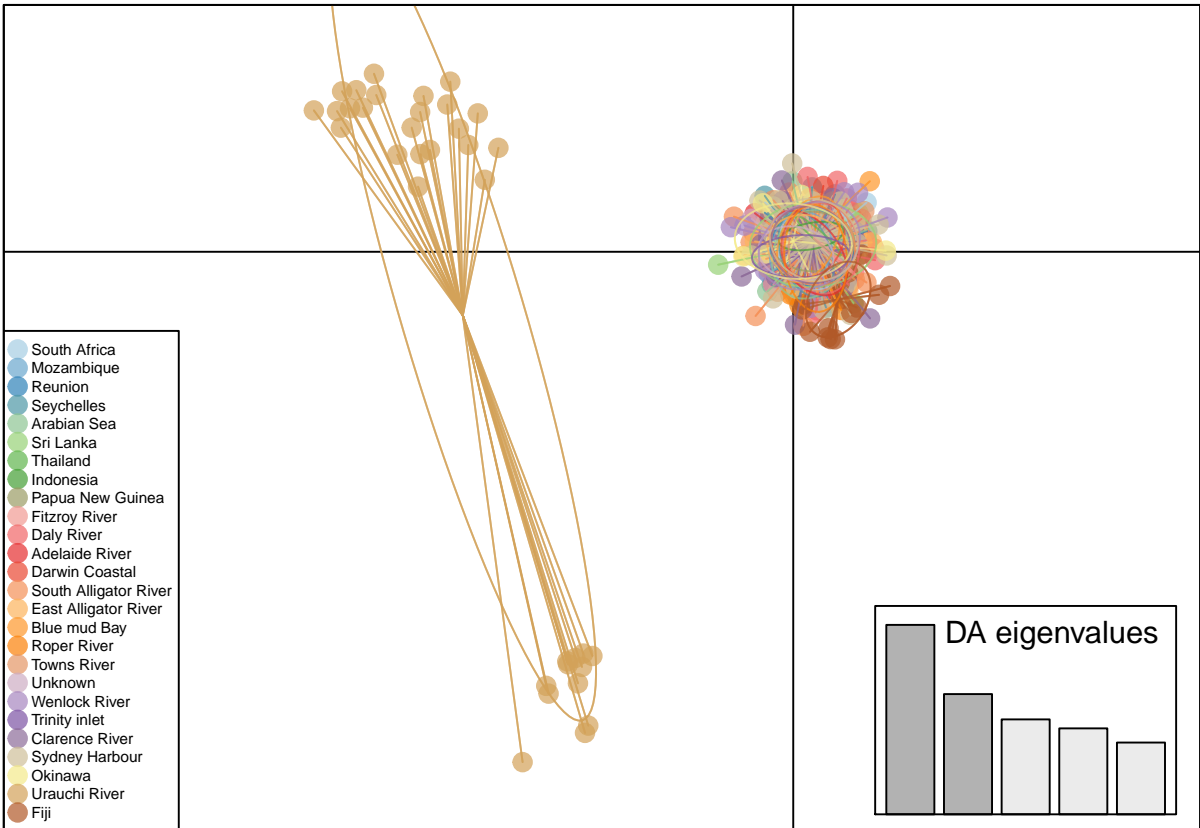

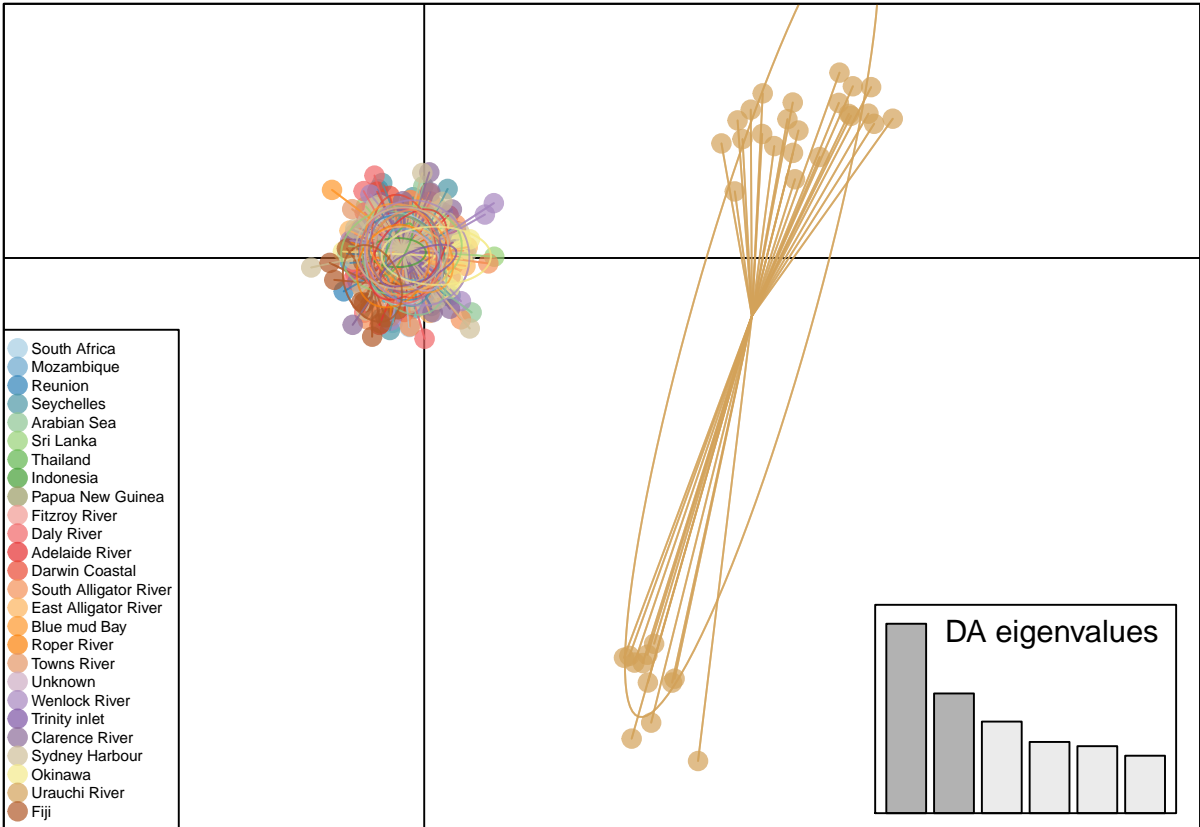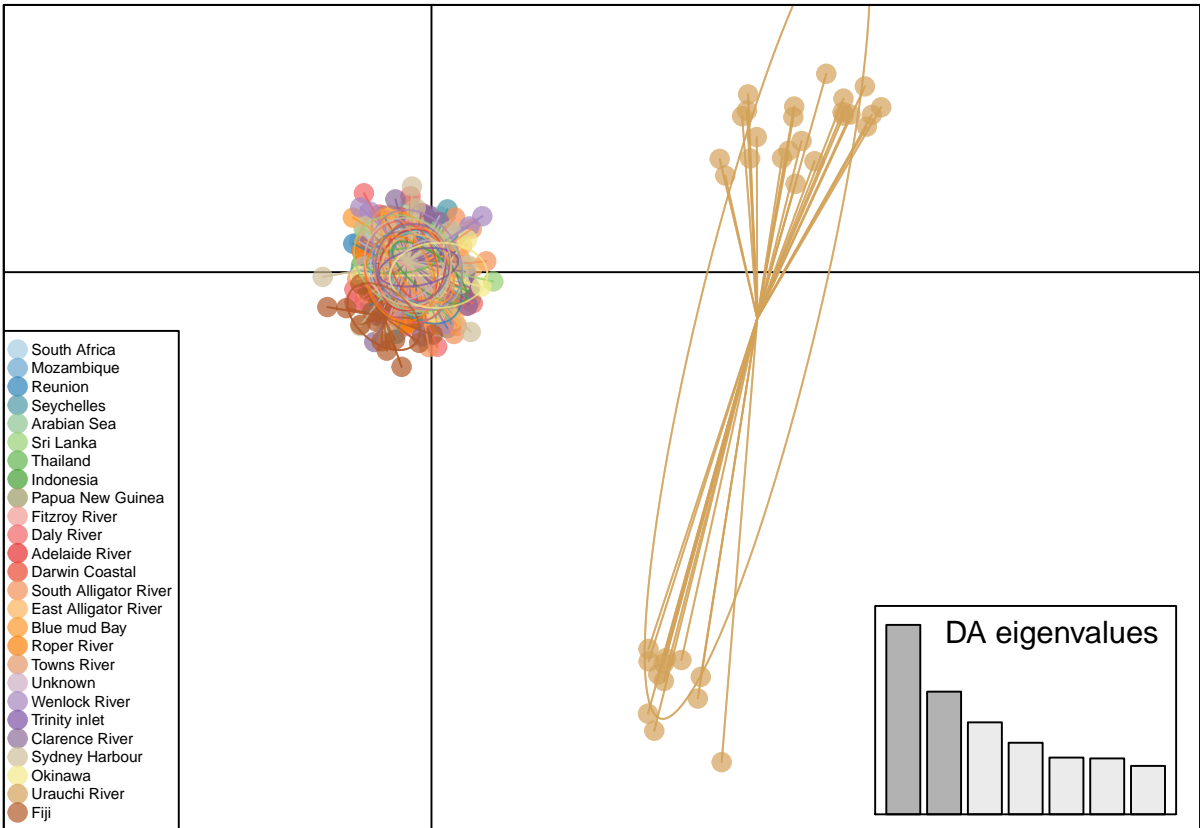

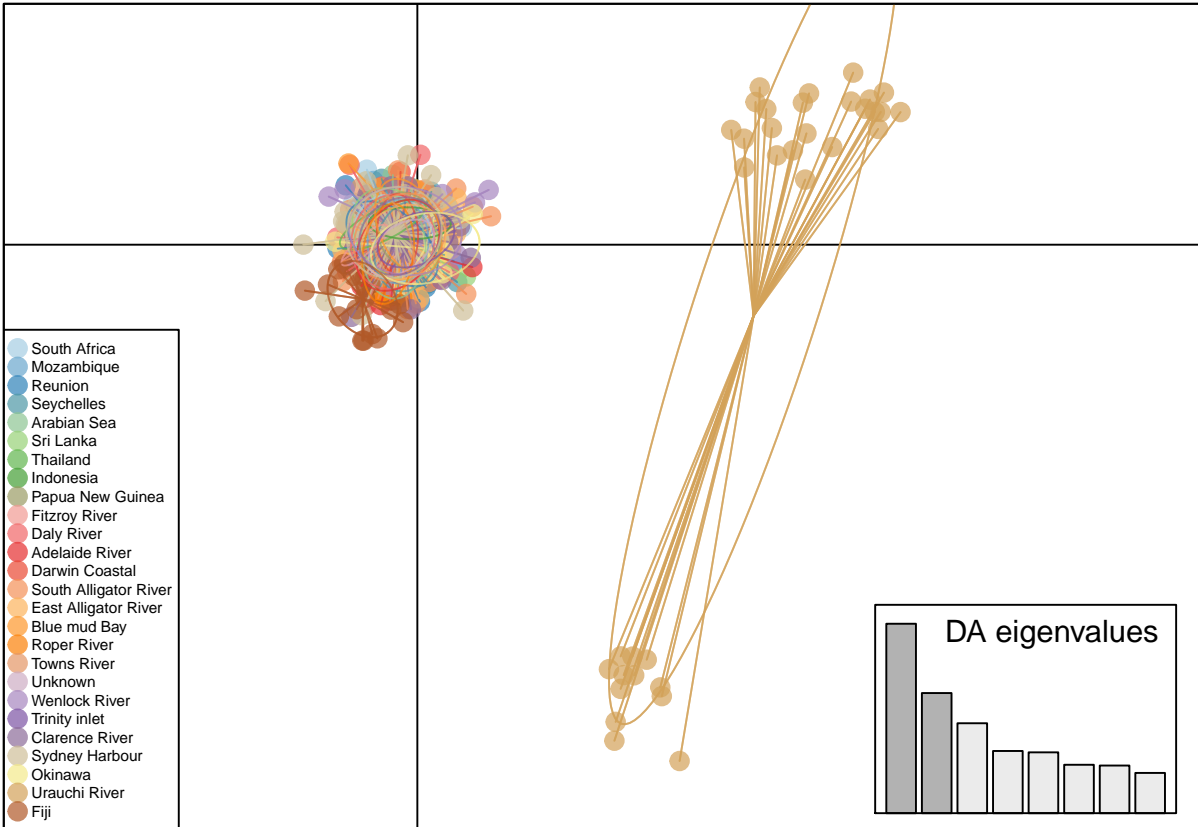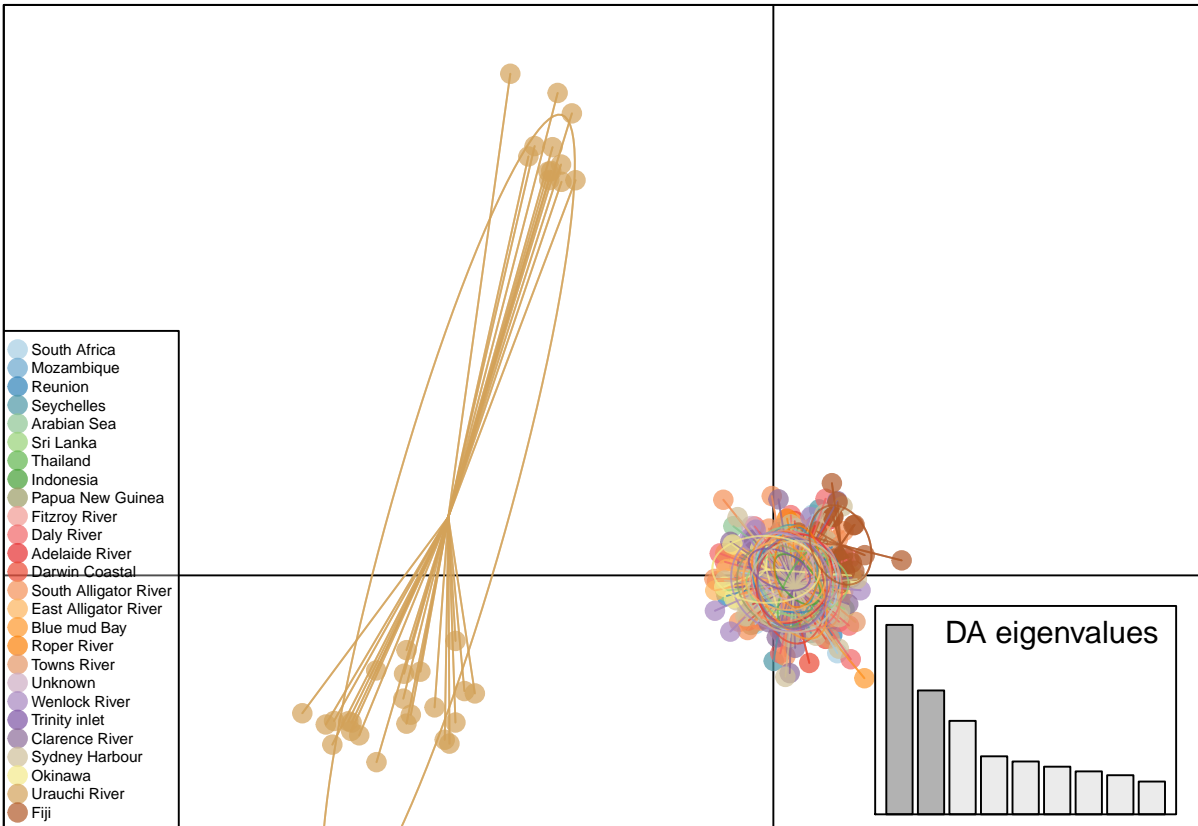

```
for (K in 2:10) {
  colour <- colours.prior[1:K]
  dapc <- get(dapc.all.object.names[K - 1])
  dapc.plot <- ade4::scatter(dapc, cex = 2, legend = TRUE, col = colour,
                             clabel = FALSE, posi.legend = "bottomleft",
```

```

        scree.pca = FALSE, posi.pca = "topleft",
        cleg = 0.75, xax = 1, yax = 2, inset.solid = 0.3)
dev.print(
  device = png,
  file = paste0("DArTcap_IWP_DAPC_scatterplot_pergroups_K",
                K, ".png"),
  width = 30,
  height = 15,
  units = "cm",
  res = 300
)
}

```

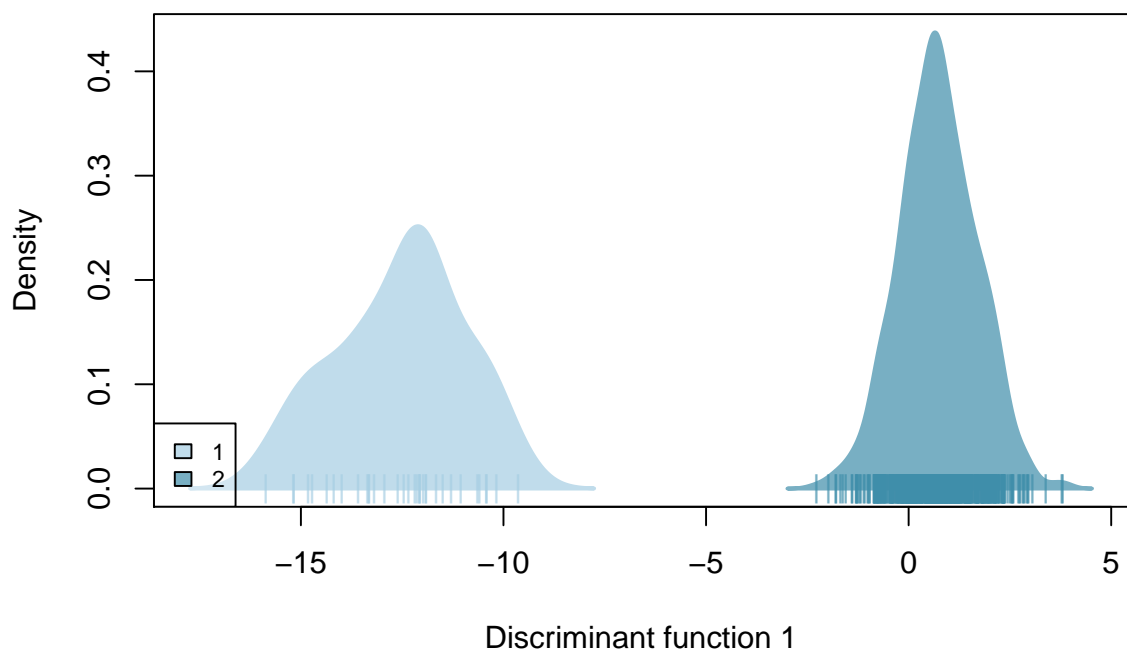

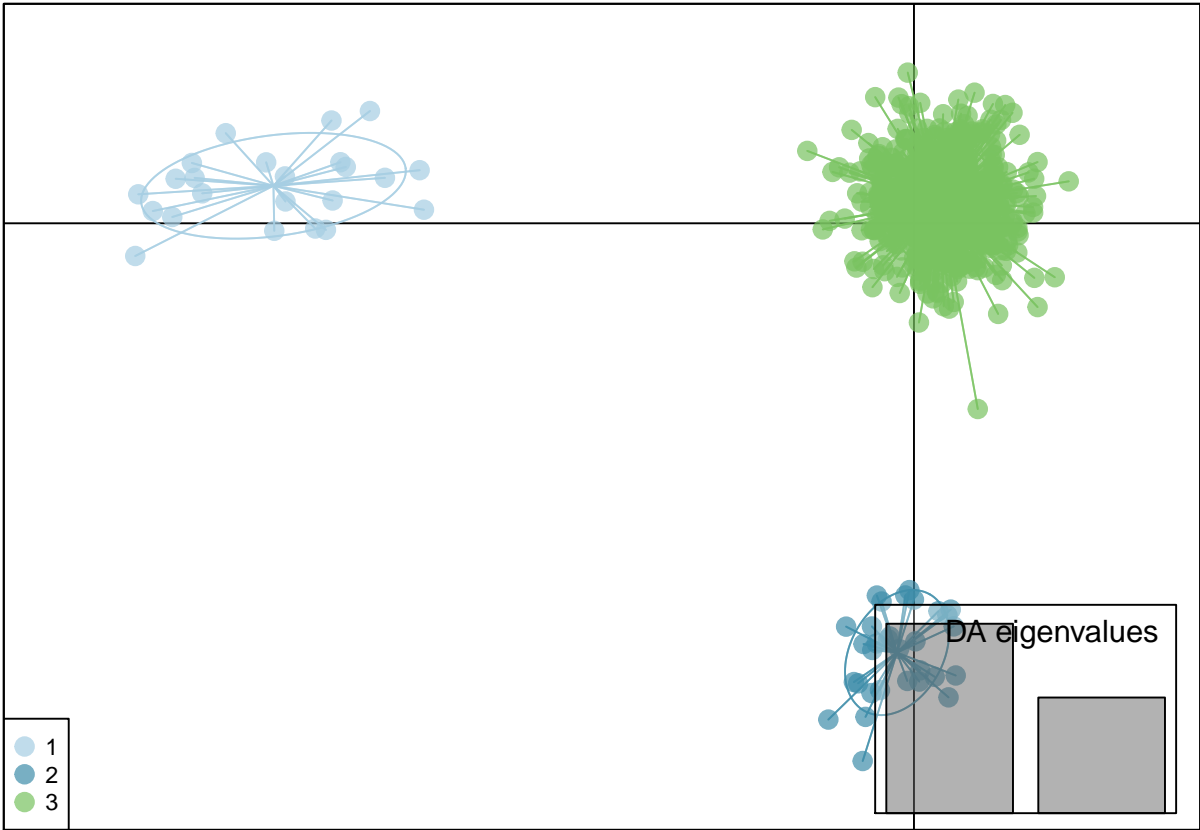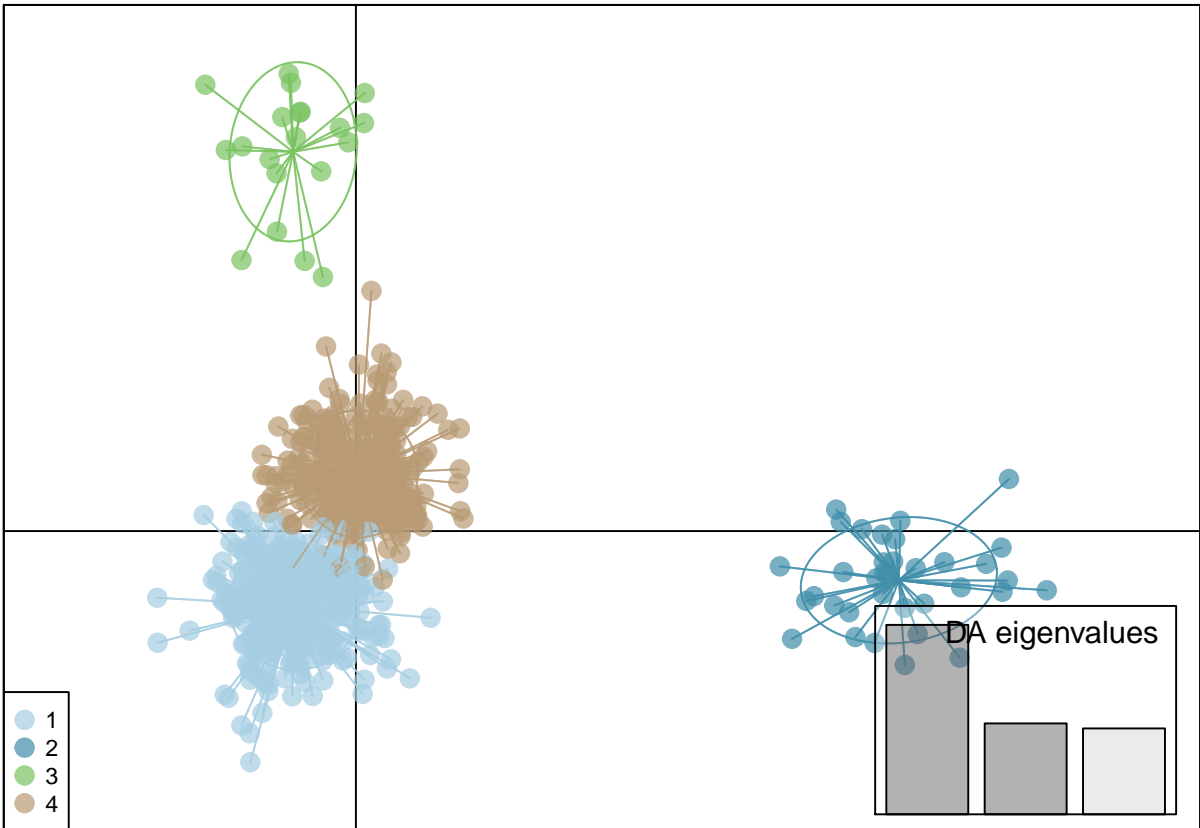

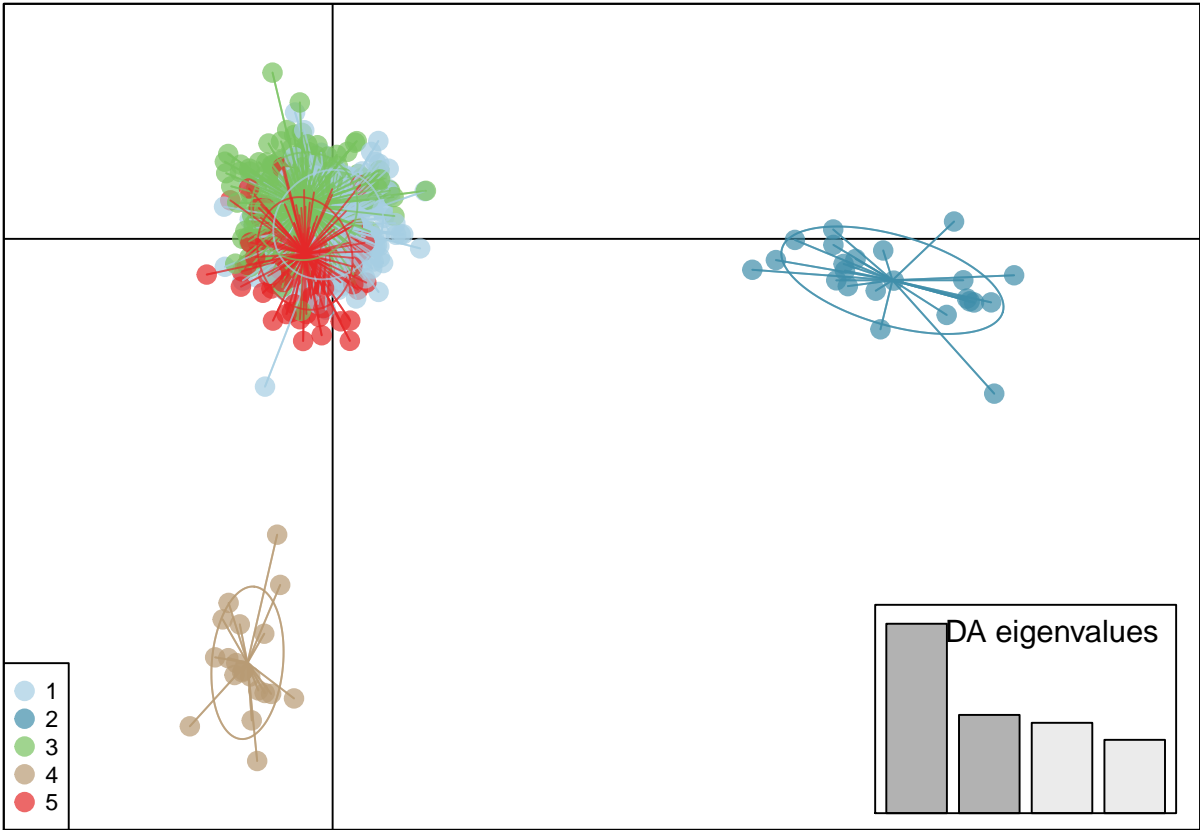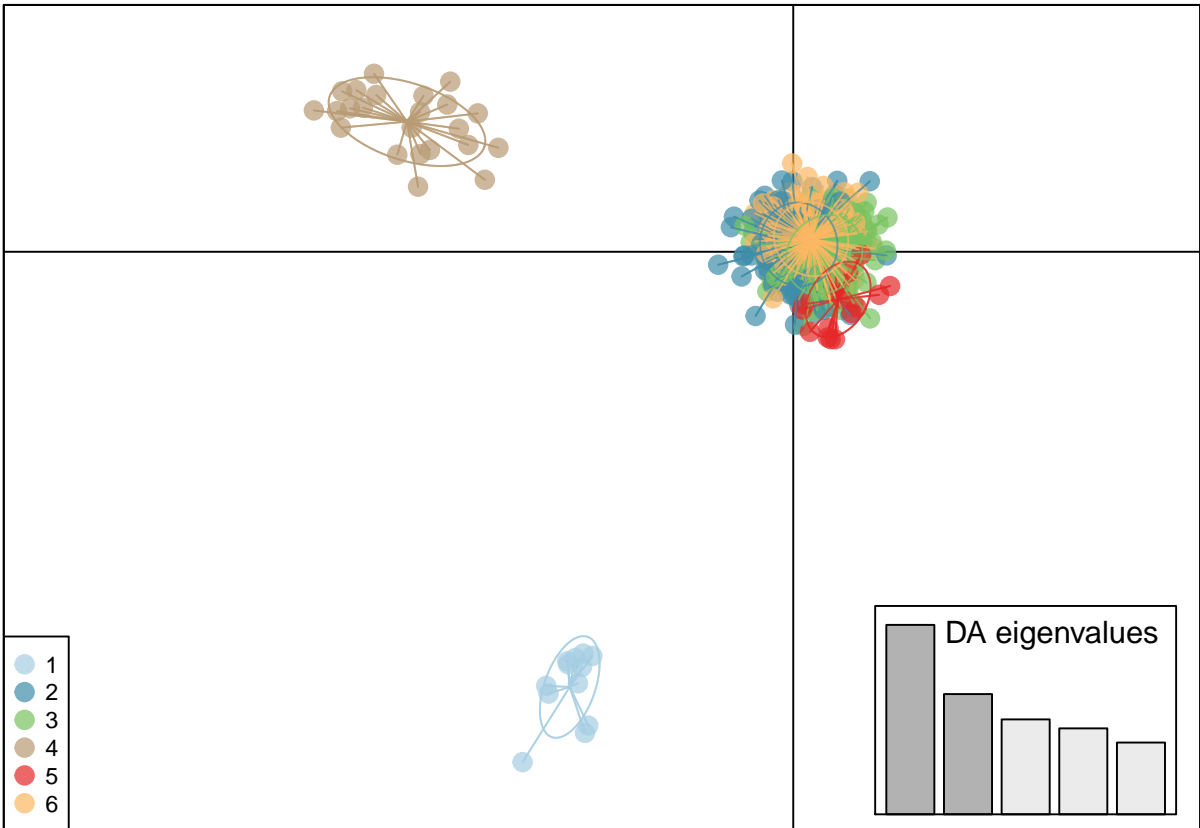

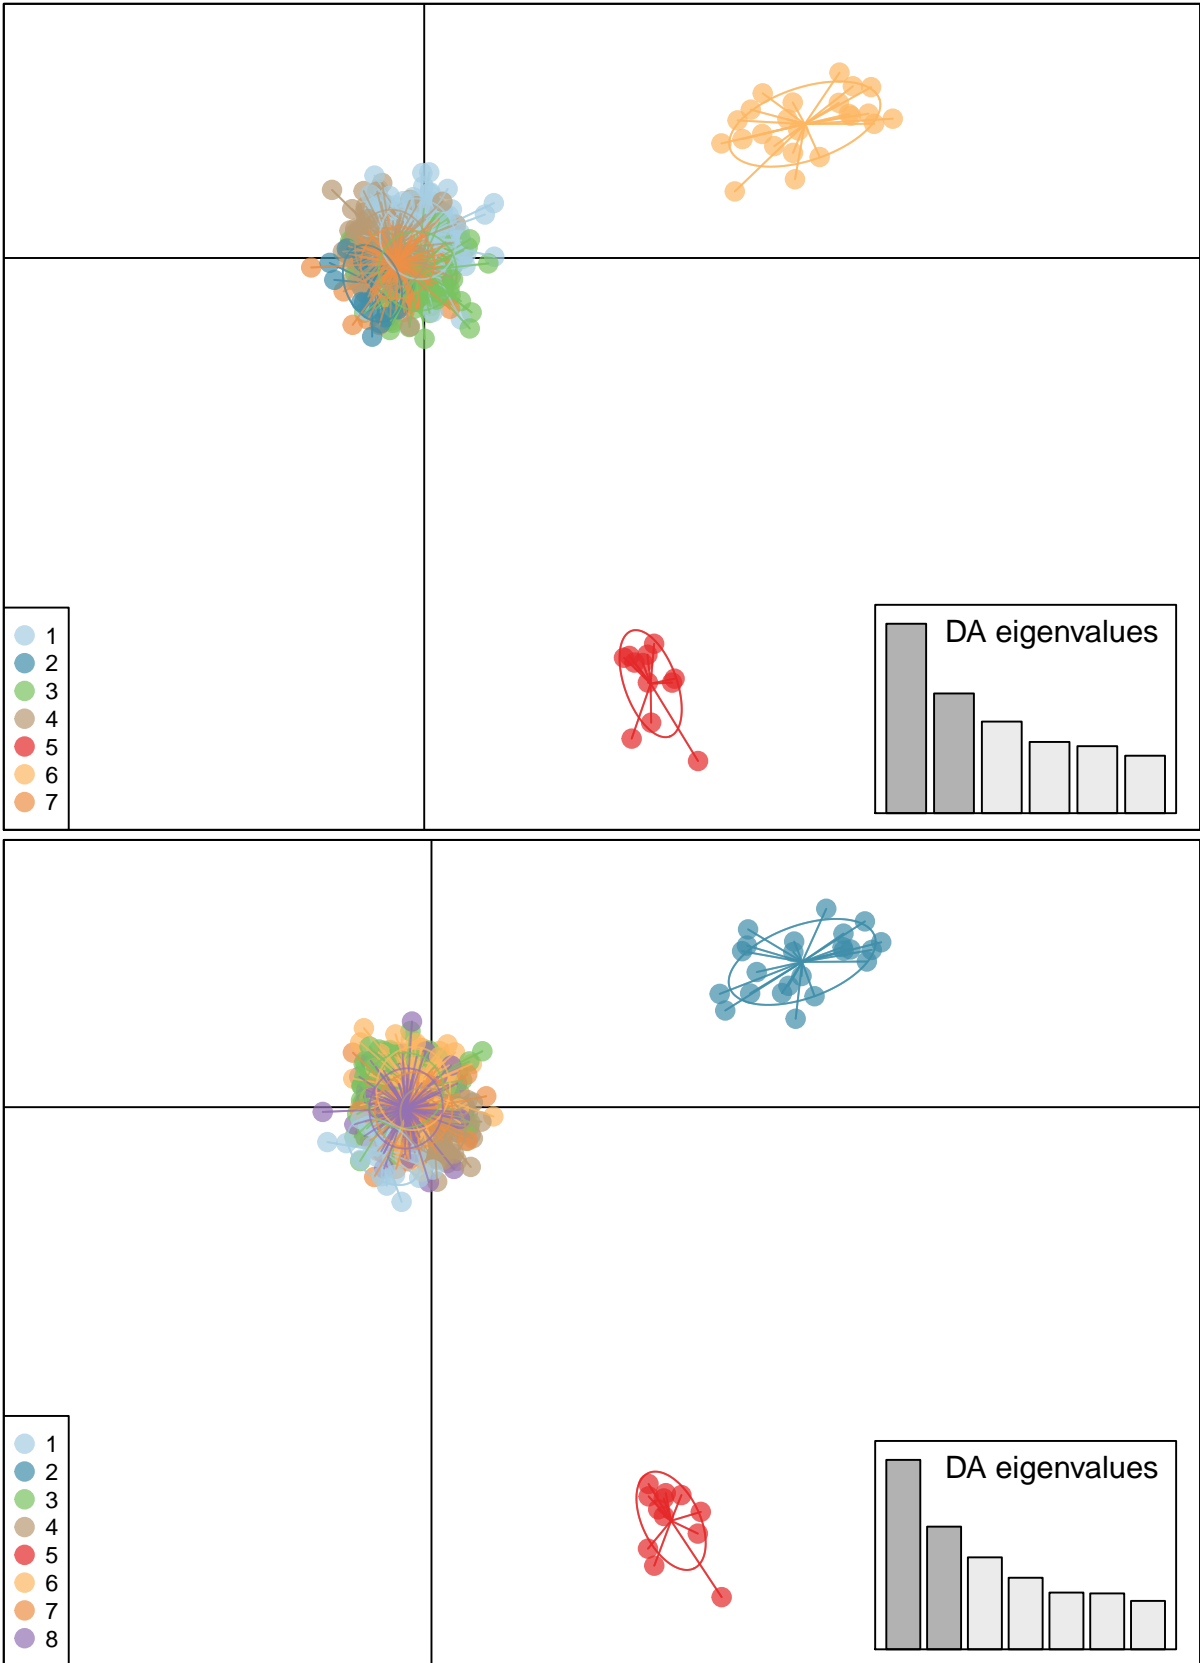



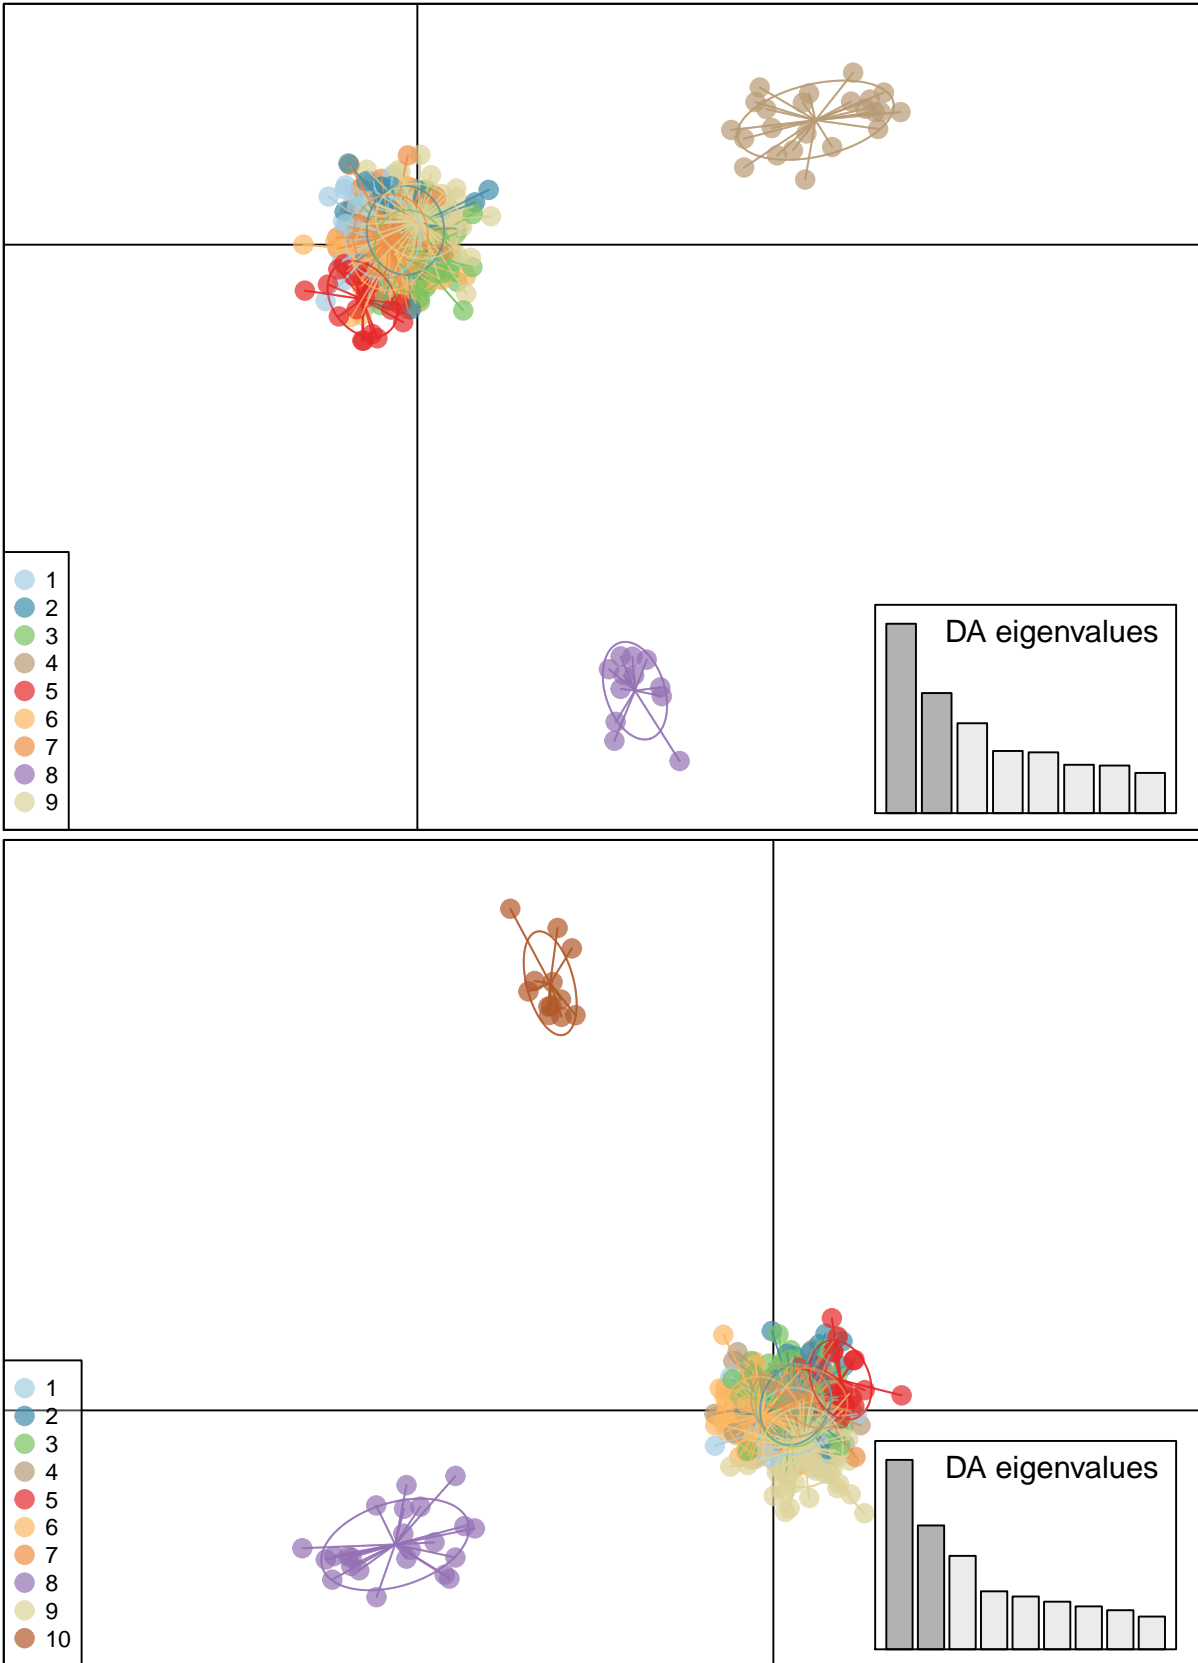

11.9.5 DAPC scatterplot - FLO

This code will *colour* individuals according to *sampling location* and **group** individuals according to DAPC **posterior membership**.

```

for (K in 3:10) {
  dapc <- get(dapc.all.object.names[K - 1])
  x <- dapc$ind.coord[,1]
  y <- dapc$ind.coord[,2]
  group <- paste("Group", as.numeric(dapc$assign))
  pop <- BS.dartcap.IWP.g1$pop
  df <- data.frame(x, y, group, pop)
  colnames(df) <- c("x", "y", "group", "pop")
  gg <- merge(df, aggregate(cbind(mean.x = x, mean.y = y) ~ group, df, mean),
             by = "group")

  plot <- ggplot2::ggplot(gg, ggplot2::aes(x,y,color = pop)) +
    ggplot2::geom_point(size = 5) +
    ggplot2::geom_point(ggplot2::aes(x = mean.x,y = mean.y),size = 5,
                        shape = 17, color = "black") +
    ggplot2::geom_segment(ggplot2::aes(x = mean.x, y = mean.y, xend = x,
                                       yend = y)) +
    ggplot2::scale_colour_manual(values = colours.26) +
    ggplot2::scale_fill_manual(values = colours.26) +
    ggplot2::geom_hline(yintercept = 0) +
    ggplot2::geom_vline(xintercept = 0) +
    ggplot2::labs(subtitle = "",
                  y = "PC2",
                  x = "PC1",
                  title = paste0("K=",K," & PC=",PC, sep = ""),
                  caption = "") +
    ggplot2::theme_minimal() +
    ggplot2::theme(
      axis.text = ggplot2::element_text(size = 5),
      axis.title.x = ggplot2::element_text(size = 10),
      axis.title.y = ggplot2::element_text(size = 10),
      legend.text = ggplot2::element_text(size = 7))
  print(plot)
  ggplot2::ggsave(plot, filename = paste0("DArTcap_IWP_DAPC_scatterplot2_K",
                                          K, ".png"),
                  width = 30, height = 15,units = "cm")
}

```

K=3 & PC=189

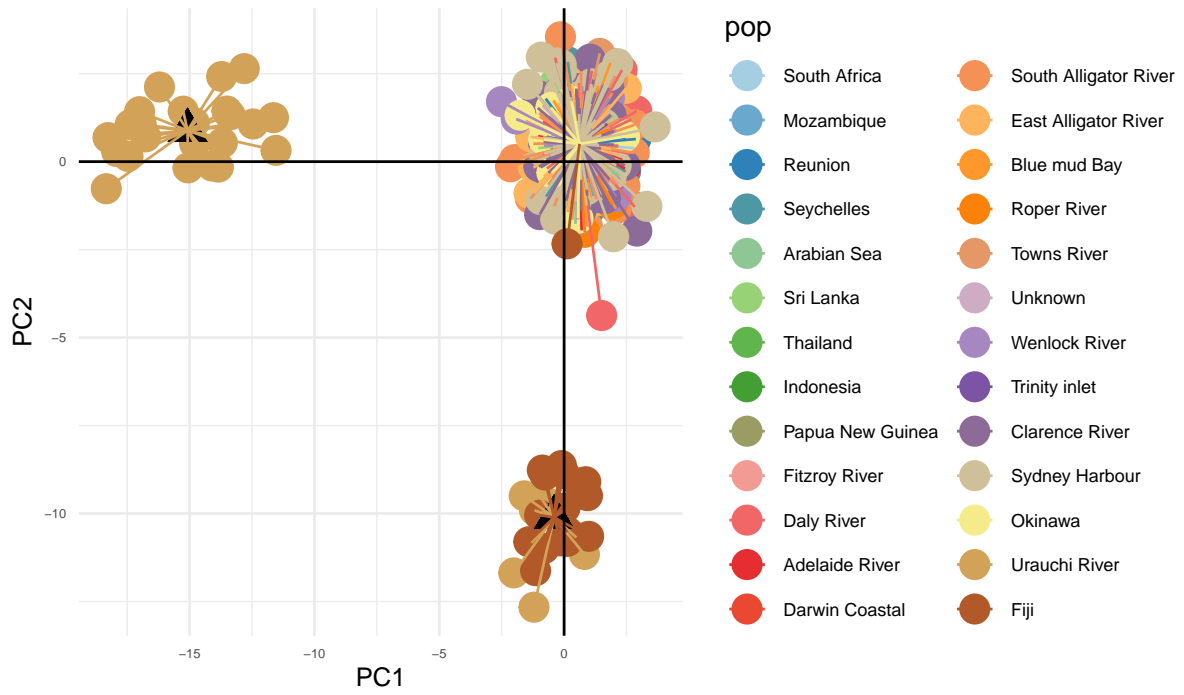

K=4 & PC=189

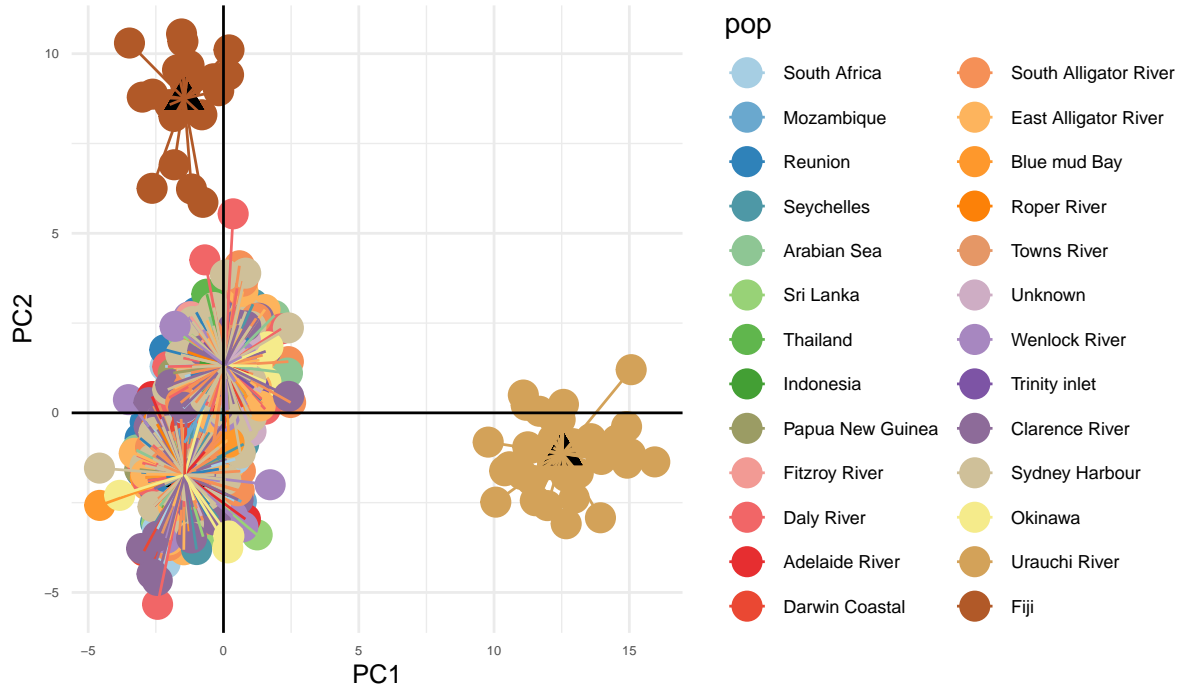

K=5 & PC=189

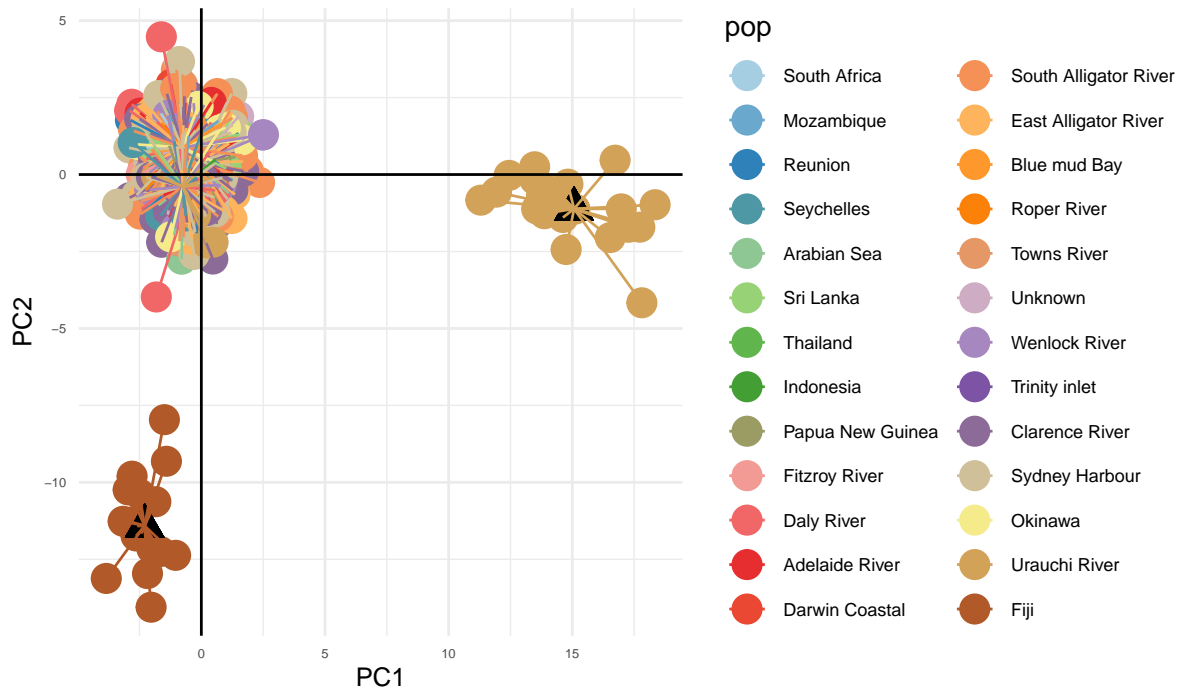

K=6 & PC=189

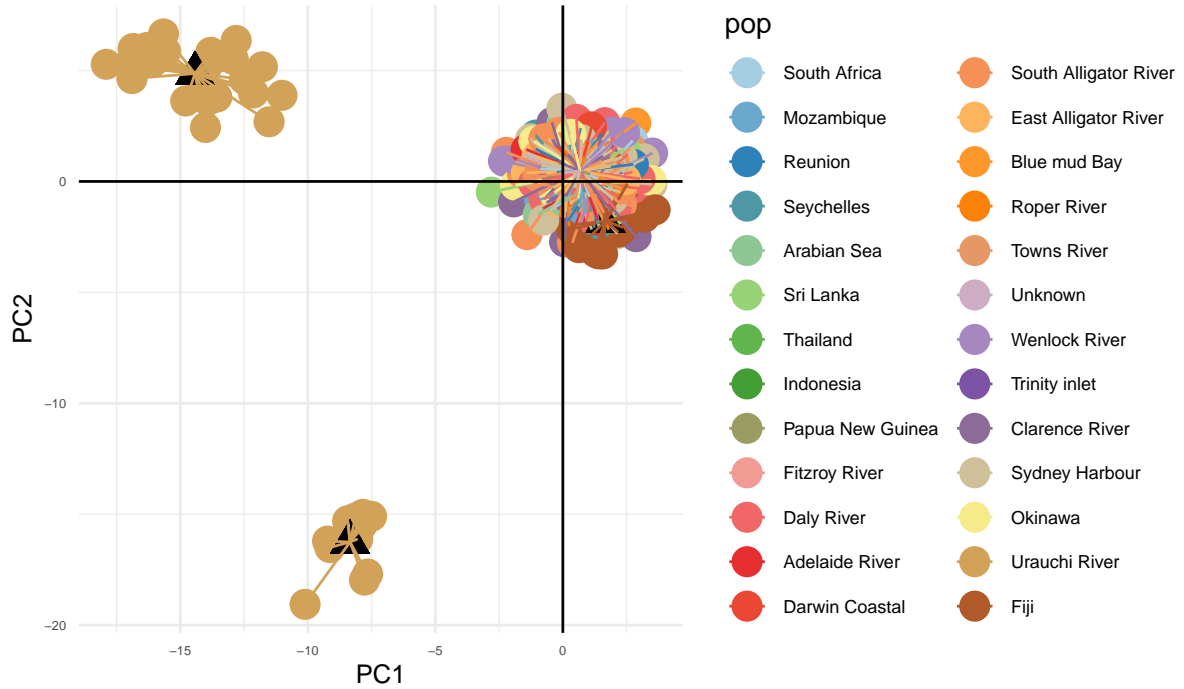

K=7 & PC=189

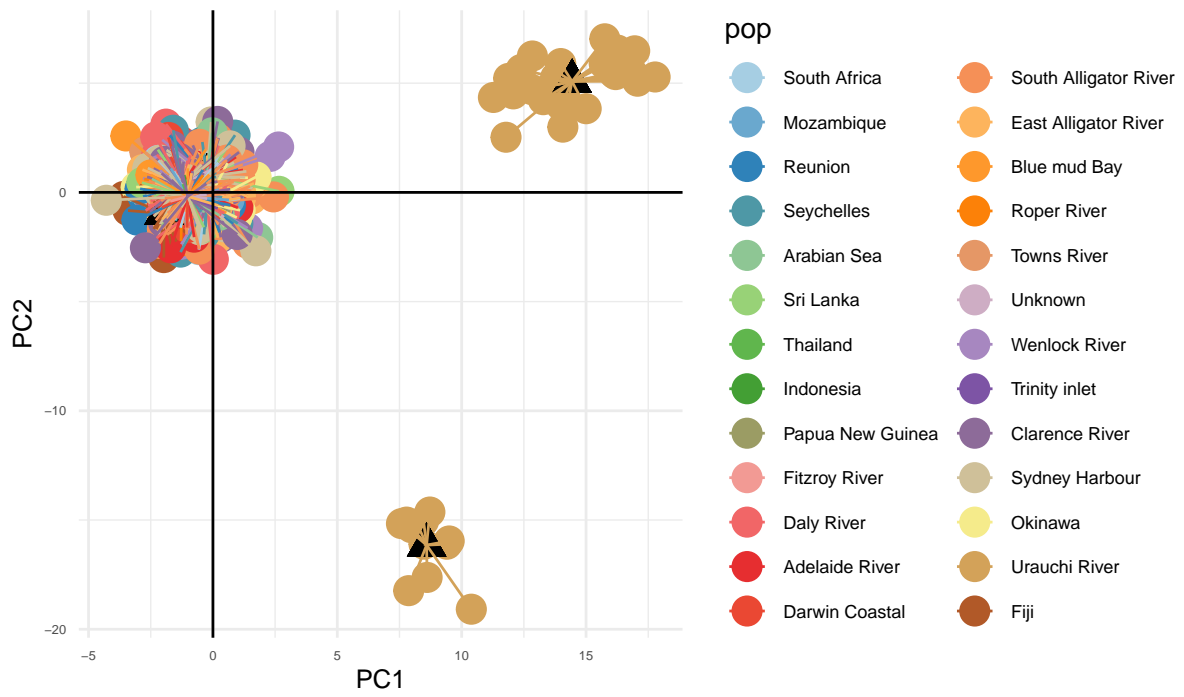

K=8 & PC=189

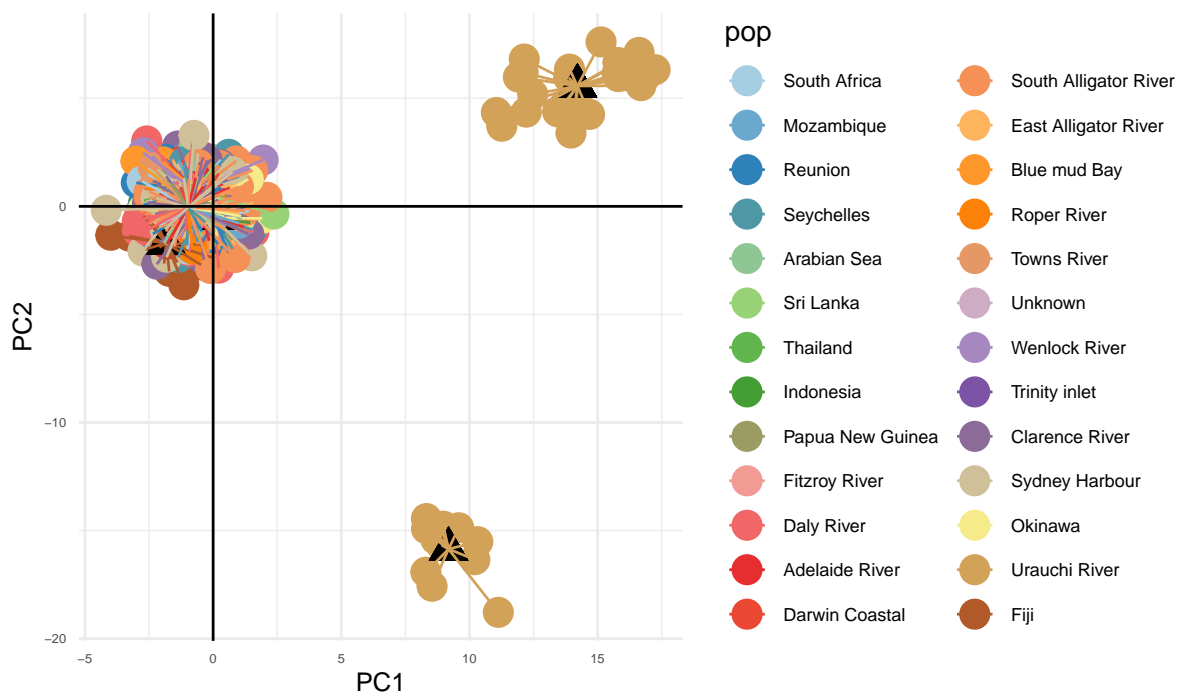

K=9 & PC=189

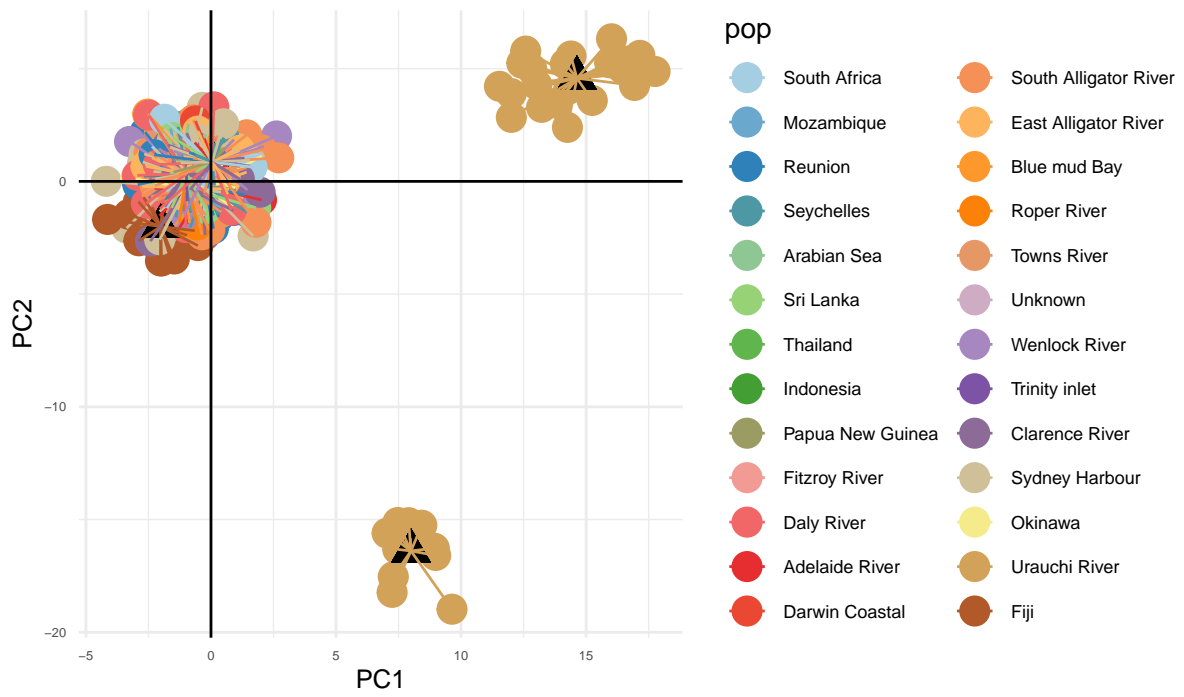

K=10 & PC=189

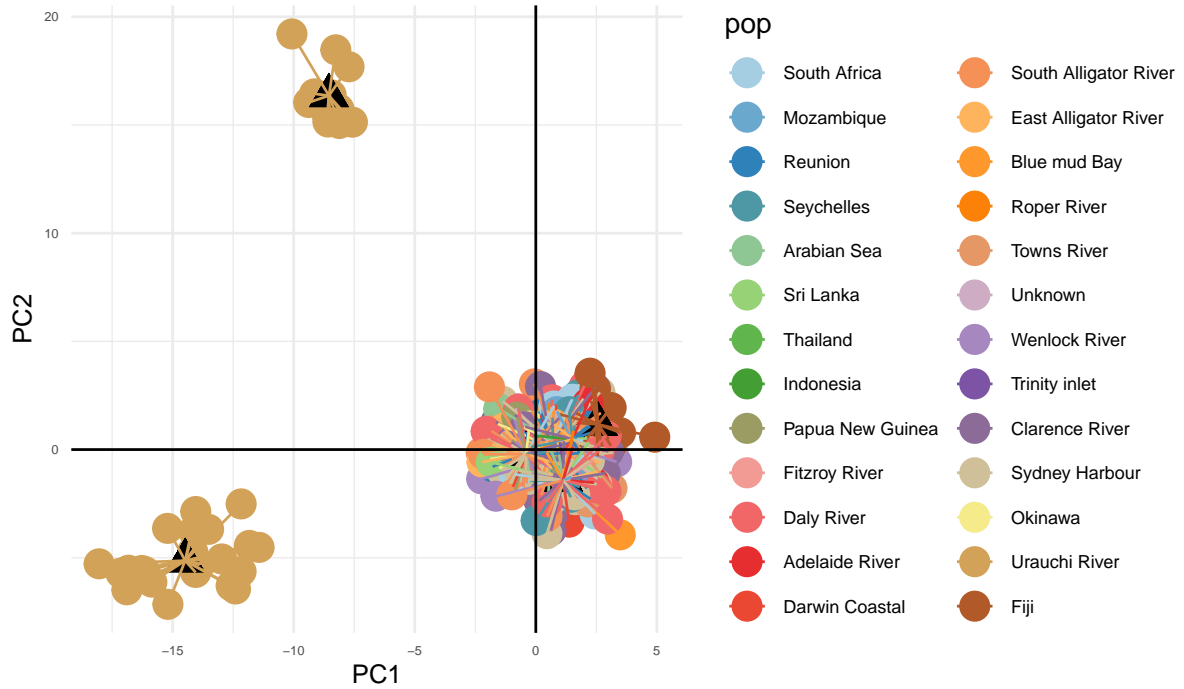

## 12 DATA6: DArTcap - Indo - West Pacific: no Japan or Fiji and subset from Australia

### 12.1 Set strata

```
strata <- radiator::read_strata("Bull_shark_DArTcap_strata5_IWP.tsv",
                              keep.two = FALSE)$strata %>%
  dplyr::filter(Region %in% c("W-IO", "N-IO", "E-IO", "E-IO/W-PAC", "W-PAC"))
id.sub <- c(strata$INDIVIDUALS[strata$Site != "Australia"],
           sample(strata$INDIVIDUALS[strata$Site == "Australia"], size = 60))
strata <- strata[strata$INDIVIDUALS %in% id.sub,]
readr::write_tsv(strata, path = "Bull_shark_DArTcap_strata6_IWP2.tsv")
```

### 12.2 Filter data

1. Marker Reproducibility: 0.98
2. Individual missingness: 0.25
3. Individual Het - low: 0
4. Individual Het - high: 0.07
5. Individual total coverage - low: 10,000
6. Individual total coverage - high: 1,000,000
7. Marker MAC - low: 3
8. Marker coverage - low: 5
9. Marker coverage - high:80
10. Marker maximum missing proportion: 0.1
11. Marker snp position on locus: n
12. Max 2 SNPs per locus
13. 1 SNP per locus according to mac
14. no LD filter
15. Individual Het - low: 0.100
16. Individual Het - high: 0.1337
17. Duplicated individuals: 0.2
18. Filter on HWE: 2 pops, 0.001

```
dartcap.data <- "SEQ_SNPs_counts_0_Target_merge.csv"
strata <- "Bull_shark_DArTcap_strata6_IWP2.tsv"
BSsnp <- radiator::filter_rad(dartcap.data, strata,
                              parallel.core = 1)
BS.dartcap.IWP2.gds <- BSsnp$gds
BS.dartcap.IWP2.tidy <- BSsnp$output$tidy.data
print(BS.dartcap.IWP2.gds, expand = TRUE, all = TRUE, attribute = TRUE,
      attribute.trim = FALSE)

save(BS.dartcap.IWP2.tidy, file = "DArTcap_IWP2.Rdata")
```

Table 47:

| FILTERS                                    | VALUES      | BEFORE                       | BLACKLIST                 |
|--------------------------------------------|-------------|------------------------------|---------------------------|
| Filter DArT reproducibility                | 0.98        | 241 / 21 / 1 / 26335 / 37537 | 0 / 0 / 0 / 1043 / 2250   |
| Filter monomorphic markers                 | NA          | 241 / 21 / 1 / 25292 / 35287 | 0 / 0 / 0 / 15102 / 23847 |
| Filter markers in common                   | NA          | 241 / 21 / 1 / 10190 / 11440 | 0 / 0 / 0 / 2105 / 2291   |
| Filter individuals based on missingness    | 0.25        | 241 / 21 / 1 / 8085 / 9149   | 4 / 0 / 0 / 0 / 0         |
| Filter individuals based on heterozygosity | 0 0.07      | 237 / 21 / 1 / 8085 / 9149   | 10 / 0 / 0 / 0 / 0        |
| Filter individuals based on total coverage | 10000 1e+06 | 227 / 21 / 1 / 8085 / 9149   | 1 / 0 / 0 / 0 / 0         |
| Filter monomorphic markers                 | NA          | 226 / 21 / 1 / 8085 / 9149   | 0 / 0 / 0 / 2298 / 2825   |
| Filter MAC                                 | 3           | 226 / 21 / 1 / 5787 / 6324   | 0 / 0 / 0 / 3358 / 3750   |
| Filter coverage min / max                  | 5-80        | 226 / 21 / 1 / 2429 / 2574   | 0 / 0 / 0 / 526 / 537     |
| Filter genotyping                          | 0.1         | 226 / 21 / 1 / 1903 / 2037   | 0 / 0 / 0 / 91 / 97       |
| Filter SNPs position on the read           | all         | 226 / 21 / 1 / 1812 / 1940   | 0 / 0 / 0 / 0 / 0         |
| Filter markers snp number                  | 3           | 226 / 21 / 1 / 1812 / 1940   | 0 / 0 / 0 / 0 / 0         |
| detect mixed genomes                       | 0.1 0.1337  | 226 / 21 / 1 / 1812 / 1940   | 20 / 0 / 0 / 0 / 0        |
| Filter monomorphic markers                 | NA          | 206 / 21 / 1 / 1812 / 1940   | 0 / 0 / 0 / 1 / 1         |
| detect duplicate genomes                   | 0.2         | 206 / 21 / 1 / 1811 / 1939   | 17 / 0 / 0 / 0 / 0        |
| Filter monomorphic markers                 | NA          | 189 / 21 / 1 / 1811 / 1939   | 0 / 0 / 0 / 1 / 1         |
| Filter HWE                                 | 20.001      | 189 / 21 / 1 / 1810 / 1938   | 0 / 0 / 0 / 2 / 2         |

### 12.2.1 Remove extra low and high heterozygous individuals

Because the average heterozygosity per sampling location is not even, certain individuals cannot be excluded without removing 'good' individuals.

```
rm <- c("CL-ARS021-F", "CL-GOM025-F.1", "CL-GOM012-F", "CL-SAF014-M", "CL-SAF002-F",
       "CL-BRZ038-U", "CLF003-F", "CL-GOM011-F", "CL-SAF015-F", "CL-SAF003-M",
       "CL-PNG005-U", "CLCR056-M", "CLCR047.1", "CLCR055-M", "CLCR066-M")

BS.dartcap.IWP2.tidy <- BS.dartcap.IWP2.tidy[
  !BS.dartcap.IWP2.tidy$INDIVIDUALS %in% rm,]
length(unique(BS.dartcap.IWP2.tidy$INDIVIDUALS)) # 189
```

## 12.3 Save data

```
Convert <- radiator::genomic_converter(BS.dartcap.IWP2.tidy,
                                       output = c("genlight", "stockr",
                                                  "pcadapt", "gtypes", "rubias"))

BS.dartcap.IWP2.gl <- Convert$genlight
BS.dartcap.IWP2.stkr <- Convert$stockr
BS.dartcap.IWP2.pc <- Convert$pcadapt
BS.dartcap.IWP2.gt <- Convert$gtypes
BS.dartcap.IWP2.rubias <- Convert$rubias

markers.meta <- radiator::extract_markers_metadata(BS.dartcap.IWP2.gds,
                                                  whitelist = TRUE)
individuals.meta <- radiator::extract_individuals_metadata(BS.dartcap.IWP2.gds,
                                                         whitelist = TRUE)
individuals.meta <- individuals.meta[individuals.meta$INDIVIDUALS %in%
                                     BS.dartcap.IWP2.gl$ind.names,]
BS.dartcap.IWP2.gl$other$ind.metrics <- individuals.meta
BS.dartcap.IWP2.gl$other$loc.metrics <- markers.meta
BS.dartcap.IWP2.gt@schemes <- individuals.meta

pop.levels <- c("South Africa", "Mozambique", "Reunion", "Seychelles",
              "Arabian Sea", "Sri Lanka", "Thailand", "Indonesia",
              "Papua New Guinea", "Fitzroy River", "Daly River",
              "Adelaide River", "Darwin Coastal", "South Alligator River",
              "East Alligator River", "Blue mud Bay", "Roper River",
              "Towns River", "Wenlock River", "Trinity inlet", "Clarence River",
              "Sydney Harbour")
BS.dartcap.IWP2.gl$pop <- factor(BS.dartcap.IWP2.gl$other$ind.metrics$Site2,
                               levels = pop.levels)
BS.dartcap.IWP2.gl <- BS.dartcap.IWP2.gl[order(BS.dartcap.IWP2.gl$pop,
                                              BS.dartcap.IWP2.gl$ind.names),]
BS.dartcap.IWP2.gl <- BS.dartcap.IWP2.gl[order(BS.dartcap.IWP2.gl$pop,
                                              BS.dartcap.IWP2.gl$ind.names)]
BS.dartcap.IWP2.rubias$repunit <- factor(BS.dartcap.IWP2.rubias$repunit,
                                         levels = pop.levels)

save(BS.dartcap.IWP2.tidy, BS.dartcap.IWP2.gl, BS.dartcap.IWP2.stkr,
     BS.dartcap.IWP2.pc, BS.dartcap.IWP2.gt, BS.dartcap.IWP2.rubias,
     markers.meta, individuals.meta, file = "DarTcap_IWP2.Rdata")
```

## 12.4 Load data

```
load("DarTcap_IWP2.Rdata")
```



```

pop.levels <- c("South Africa", "Mozambique", "Reunion" , "Seychelles",
              "Arabian Sea", "Sri Lanka", "Thailand", "Indonesia",
              "Papua New Guinea" , "Australia")
BS.dartcap.IWP2.gl$pop <- factor(BS.dartcap.IWP2.gl$other$ind.metrics$Site,
                               levels = pop.levels)
BS.dartcap.IWP2.gl <- BS.dartcap.IWP2.gl[order(BS.dartcap.IWP2.gl$pop,
                                              BS.dartcap.IWP2.gl$ind.names),]

unique(BS.dartcap.IWP2.tidy$POP_ID)
AUS <- c( "Daly_River", "Wenlock_River", "Sydney_Harbour","Clarence_River",
         "Fitzroy_River","Adelaide_River","South_Alligator_River","Trinity_inlet",
         "Blue_mud_Bay","East_Alligator_River","Towns_River","Darwin_Coastal")
POP_ID <- as.character(BS.dartcap.IWP2.tidy$POP_ID)
POP_ID[POP_ID %in% AUS] <- "Australia"
pop.levels1 <- stringr::str_replace_all(pop.levels, " ", "_")
BS.dartcap.IWP2.tidy$POP_ID <- factor(POP_ID, levels = pop.levels1)
BS.dartcap.IWP2.tidy <- BS.dartcap.IWP2.tidy[order(BS.dartcap.IWP2.tidy$POP_ID,
                                                  BS.dartcap.IWP2.tidy$INDIVIDUALS),]

adegenet::nInd(BS.dartcap.IWP2.gl) # 189
adegenet::nLoc(BS.dartcap.IWP2.gl) # 1808
summary(BS.dartcap.IWP2.gl$pop)
sum(duplicated(BS.dartcap.IWP2.gl$other$ind.metrics$`Genetic code`))# 0 replicate left
sum(baits$CloneID %in% BS.dartcap.IWP2.gl$other$loc.metrics$LOCUS) #72

## [1] Arabian_Sea          Sri_Lanka          Thailand
## [4] Mozambique            Reunion           South_Africa
## [7] Papua_New_Guinea      Seychelles        Indonesia
## [10] Daly_River            Wenlock_River     Sydney_Harbour
## [13] Clarence_River        Fitzroy_River     Adelaide_River
## [16] South_Alligator_River Trinity_inlet      Blue_mud_Bay
## [19] East_Alligator_River Towns_River        Darwin_Coastal
## 21 Levels: Arabian_Sea Sri_Lanka Thailand Mozambique Reunion ... Darwin_Coastal
## [1] 189
## [1] 1936
##      South Africa      Mozambique          Reunion          Seychelles
##           22           9              26           35
##      Arabian Sea      Sri Lanka          Thailand          Indonesia
##           15           11              4              4
## Papua New Guinea      Australia
##           9           54
## [1] 0
## [1] 72

```

## 12.5 Remove sex-linked markers

```

load("Sex-linked_marker_DArTcap.Rdata")
load("Sex_results.Rdata")
sum(bull_shark$sexy.summary$CLONE_ID %in% SLM$sexy.summary$CLONE_ID) #33
sum(SLM$sexy.summary$CLONE_ID %in% bull_shark$sexy.summary$CLONE_ID) #23
sex.markers <- unique(c(bull_shark$sexy.summary$CLONE_ID,
                       SLM$sexy.summary$CLONE_ID))

sum(BS.dartcap.IWP2.gl$loc.names %in% sex.markers) #23
locnames <- BS.dartcap.IWP2.gl$loc.names
BS.dartcap.IWP2.gl <- BS.dartcap.IWP2.gl[,!locnames %in% sex.markers]

```

```

BS.dartcap.IWP2.gl$other$loc.metrics <- BS.dartcap.IWP2.gl$other$loc.metrics[
  !locnames %in% sex.markers,]

sum(sex.markers %in% unique(BS.dartcap.IWP2.tidy$LOCUS)) # 22
BS.dartcap.IWP2.tidy <- BS.dartcap.IWP2.tidy[!BS.dartcap.IWP2.tidy$LOCUS %in%
  sex.markers,]

locus.gt <- stringr::str_match(pattern = "__\\s*(.*?)\\s*__",
  string = BS.dartcap.IWP2.gt@data$locus)[,2]
BS.dartcap.IWP2.gt <- BS.dartcap.IWP2.gt[,!locus.gt %in% sex.markers, ,
  drop = TRUE]

locus.rubias <- stringr::str_match(pattern = "__\\s*(.*?)\\s*__",
  string = colnames(BS.dartcap.IWP2.rubias))[,2]
BS.dartcap.IWP2.rubias <- BS.dartcap.IWP2.rubias[,!locus.rubias %in%
  sex.markers]

## [1] 33
## [1] 23
## [1] 23
## [1] 22

```

## 12.6 Genetic diversity

```

set.seed(124)

pop.levels <- c("South Africa", "Mozambique", "Reunion" , "Seychelles",
  "Arabian Sea", "Sri Lanka", "Thailand", "Indonesia",
  "Papua New Guinea" , "Australia")

gl <- BS.dartcap.IWP2.gl
gl$pop <- factor(gl$other$ind.metrics$Site, levels = pop.levels)
gl <- gl[order(gl$pop,gl$ind.names)]

gl2gpop(gl, filename = "BS_dartcap_IWP2_genepop.txt")
bastat <- diveRsity::basicStats(infile = "BS_dartcap_IWP2_genepop.txt",
  outfile = "BS_dartcap_IWP2_BasicStat_output.txt",
  fis_ci = TRUE, ar_ci = TRUE, fis_boots = 1000,
  ar_boots = 1000, mc_reps = 1000,
  rarefaction = FALSE, ar_alpha = 0.05,
  fis_alpha = 0.05)

length(bastat$main_tab)#10
gendiv <- data.frame(
  "South Africa" = bastat$main_tab[[1]]$overall,
  "Mozambique" = bastat$main_tab[[2]]$overall,
  "Reunion" = bastat$main_tab[[3]]$overall,
  "Seychelles" = bastat$main_tab[[4]]$overall,
  "Arabian Sea" = bastat$main_tab[[5]]$overall,
  "Sri Lanka" = bastat$main_tab[[6]]$overall,
  "Thailand" = bastat$main_tab[[7]]$overall,
  "Indonesia" = bastat$main_tab[[8]]$overall,
  "Papua New Guinea" = bastat$main_tab[[9]]$overall,
  "Australia" = bastat$main_tab[[10]]$overall,
  check.names = FALSE)
row.names(gendiv) <- rownames(bastat$main_tab[[1]])

df <- as.data.frame(gl)

```

```

df[df == "0"] <- "11"
df[df == "1"] <- "12"
df[df == "2"] <- "22"
gen.gi <- adegenet::df2genind(df, ploidy = 2, ncode = 2, pop = gl$pop)
ris_basic <- hierfstat::basic.stats(gen.gi)
fis.hierfstat <- apply(ris_basic$Fis, 2, mean, na.rm=T)
fis.CI <- hierfstat::boot.ppfis(gen.gi, nboot = 1000, quant = c(0.025,0.975),
                              diploid = TRUE, dig = 4)
df <- data.frame(fis.hierfstat, fis.CI.low = fis.CI$fis.ci[,1],
                fis.CI.high = fis.CI$fis.ci[,2])
df <- as.data.frame(t(df))
gendiv <- rbind(gendiv, df)

readr::write_tsv(gendiv, path = "DARtcap_IWP2_gendiv.txt")
save(gendiv, file = "DARtcap_IWP2_gendiv.Rdata")

load("DARtcap_IWP2_gendiv.Rdata")
shortnames <- c("SAF", "MOZ", "RUN", "SEY", "ARS", "SRL", "TAI", "IND",
                "PNG", "AUS")
knitr::kable(gendiv, col.names = shortnames, digits = 4, caption = "") %>%
  kableExtra::kable_styling(full_width = FALSE, font_size = 5,
                             latex_options = c("hold_position"))

```

Table 48:

|               | SAF     | MOZ     | RUN     | SEY     | ARS     | SRL     | TAI     | IND     | PNG     | AUS     |
|---------------|---------|---------|---------|---------|---------|---------|---------|---------|---------|---------|
| ar            | 1.3280  | 1.3010  | 1.3220  | 1.3300  | 1.3210  | 1.3080  | 1.2800  | 1.2580  | 1.3050  | 1.3340  |
| size          | 21.8700 | 8.7070  | 25.6740 | 34.7520 | 14.9200 | 10.9490 | 3.9810  | 3.9740  | 8.9420  | 53.6900 |
| obs_het       | 0.1150  | 0.1140  | 0.1130  | 0.1170  | 0.1160  | 0.1160  | 0.1240  | 0.1150  | 0.1160  | 0.1150  |
| exp_het       | 0.1200  | 0.1180  | 0.1190  | 0.1200  | 0.1180  | 0.1150  | 0.1090  | 0.1020  | 0.1140  | 0.1210  |
| uexp_het      | 0.1230  | 0.1250  | 0.1220  | 0.1220  | 0.1220  | 0.1210  | 0.1250  | 0.1170  | 0.1210  | 0.1230  |
| fis           | 0.0350  | 0.0210  | 0.0430  | 0.0270  | 0.0030  | -0.0120 | -0.1360 | -0.1300 | -0.0260 | 0.0430  |
| hwe_glb       | 1.0000  | 1.0000  | 1.0000  | 1.0000  | 1.0000  | 1.0000  | 1.0000  | 1.0000  | 1.0000  | 1.0000  |
| hwe_hom       | 1.0000  | 1.0000  | 1.0000  | 1.0000  | 1.0000  | 1.0000  | 1.0000  | 1.0000  | 1.0000  | 1.0000  |
| hwe_het       | 1.0000  | 1.0000  | 1.0000  | 1.0000  | 1.0000  | 1.0000  | 1.0000  | 1.0000  | 1.0000  | 1.0000  |
| fis_lo        | 0.0000  | -0.0830 | 0.0080  | 0.0020  | -0.0530 | -0.0930 | -0.3910 | -0.5630 | -0.1220 | 0.0270  |
| fis_hi        | 0.0280  | 0.0080  | 0.0390  | 0.0250  | -0.0040 | -0.0210 | -0.1360 | -0.1300 | -0.0360 | 0.0410  |
| ar_lo         | 1.2780  | 1.2020  | 1.2710  | 1.2800  | 1.2290  | 1.2150  | 1.2240  | 1.1690  | 1.2160  | 1.2830  |
| ar_hi         | 1.3570  | 1.3530  | 1.3470  | 1.3520  | 1.3550  | 1.3570  | 1.3500  | 1.3200  | 1.3500  | 1.3590  |
| fis.hierfstat | 0.0570  | 0.0750  | 0.0613  | 0.0409  | 0.0353  | 0.0326  | -0.0083 | -0.0052 | 0.0286  | 0.0518  |
| fis.CI.low    | 0.0515  | 0.0693  | 0.0585  | 0.0292  | 0.0255  | 0.0109  | -0.0232 | -0.0178 | 0.0215  | 0.0506  |
| fis.CI.high   | 0.0855  | 0.1314  | 0.0937  | 0.0579  | 0.0669  | 0.0606  | 0.0511  | 0.0617  | 0.0716  | 0.0762  |

### 12.6.1 Number of monomorphic markers per population

```

pop.levels <- c("South Africa", "Mozambique", "Reunion", "Seychelles",
               "Arabian Sea", "Sri Lanka", "Thailand", "Indonesia",
               "Papua New Guinea", "Australia")

monomorphics <- c()
for (i in 1:length(pop.levels)) {
  x <- BS.dartcap.IWP2.gl[BS.dartcap.IWP2.gl$pop == pop.levels[i]]
  x2 <- dartR::gl.filter.monomorphs(x, verbose = 0)
  locs <- adegenet::nLoc(x) - adegenet::nLoc(x2)
  monomorphics[i] <- locs
}
names(monomorphics) <- pop.levels
shortnames <- c("SAF", "MOZ", "RUN", "SEY", "ARS", "SRL", "TAI", "IND",
                "PNG", "AUS")
knitr::kable(t(as.table(monomorphics)), col.names = shortnames, digits = 4,
              caption = "") %>%
  kableExtra::kable_styling(full_width = FALSE, font_size = 5,
                             latex_options = c("hold_position"))

```

Table 49:

| SAF | MOZ  | RUN | SEY | ARS | SRL | TAI  | IND  | PNG  | AUS |
|-----|------|-----|-----|-----|-----|------|------|------|-----|
| 625 | 1012 | 627 | 491 | 794 | 928 | 1299 | 1356 | 1010 | 276 |

## 12.6.2 Nucleotide diversity and inbreeding

```
pi.sum <- radiator::pi(
  data = BS.dartcap.IWP2.tidy,
  read.length = 70,
  parallel.core = parallel::detectCores() - 1,
  path.folder = NULL,
  verbose = TRUE
)

FIS.sum <- radiator::ibd_g_fh(data = BS.dartcap.IWP2.tidy,
  path.folder = NULL, verbose = TRUE)

save(pi.sum, FIS.sum, file = "DarTcap_IWP2_pi_FIS_Sites.Rdata")

load("DarTcap_IWP2_pi_FIS_Sites.Rdata")
pi.sum$boxplot.pi
```

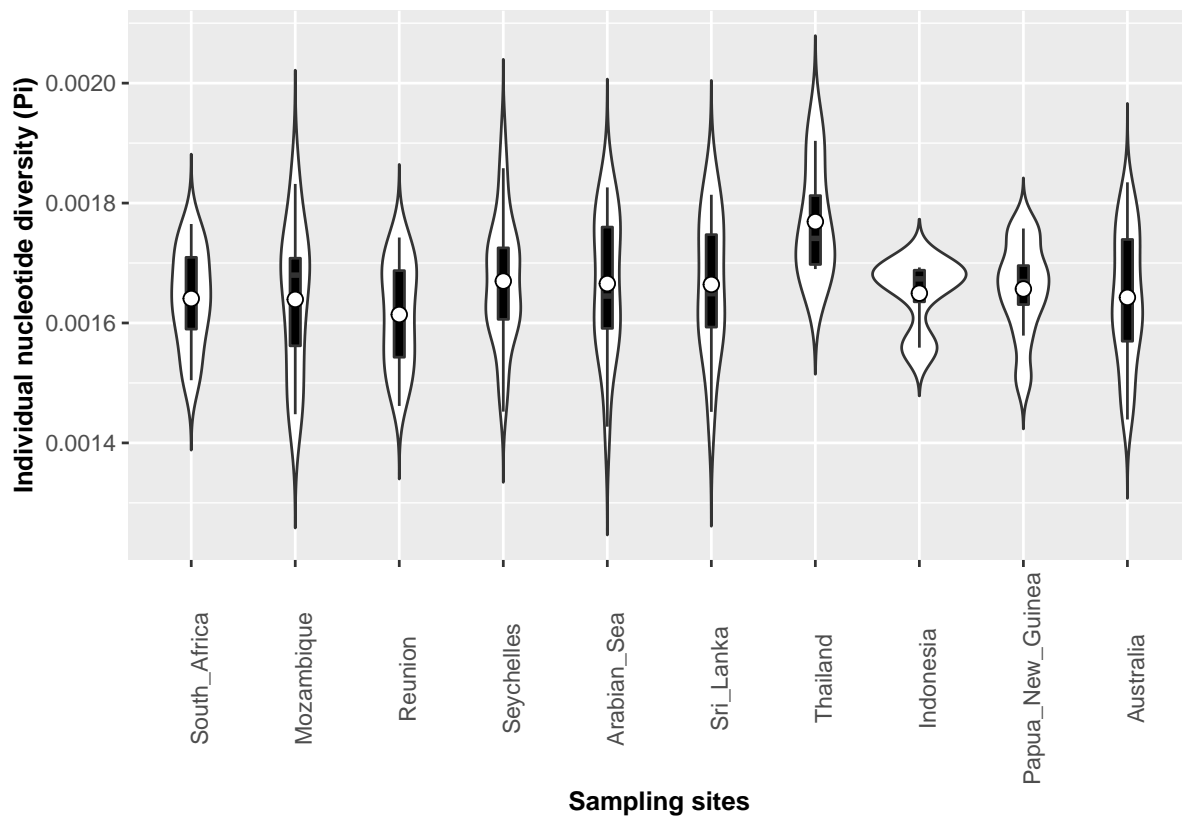

```
FIS.sum$fh.box.plot
```

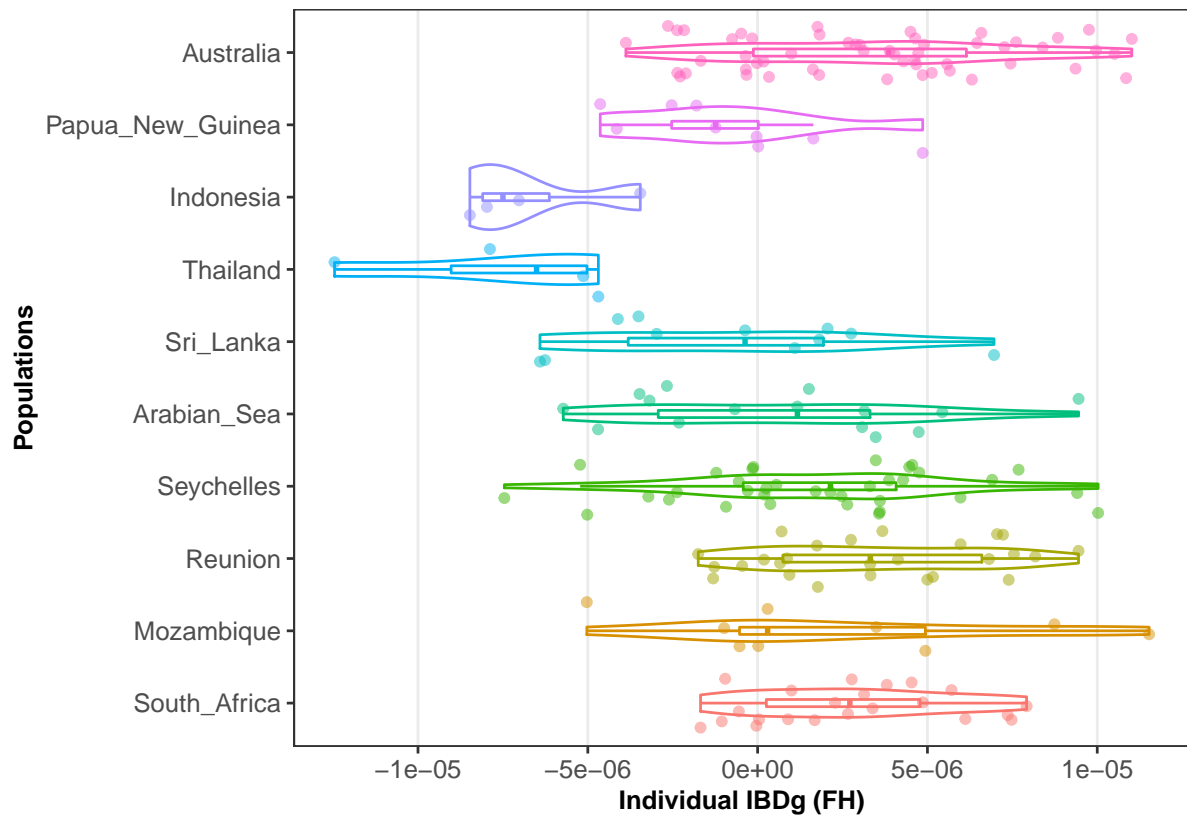

## 12.7 Genetic differentiation

```
strata <- BS.dartcap.IWP2.gt@schemes$Site
names(strata) <- BS.dartcap.IWP2.gt@schemes$INDIVIDUALS
strataG::setStrata(BS.dartcap.IWP2.gt) <- strata
```

```
Fst.gt <- strataG::popStructTest(
  BS.dartcap.IWP2.gt,
  nrep = 1000,
  stats = "all",
  type = "pairwise",
  keep.null = FALSE,
  quietly = TRUE,
  nb.cores = parallel::detectCores() - 1,
  write.output = FALSE
)
```

```
save(Fst.gt, file = "DARtcap_IWP2_FST.Rdata")
readr::write_tsv(Fst.gt$pairwise$result, path = "DARtcap_IWP2_FST.txt")
```

```
load("DARtcap_IWP2_FST.Rdata")
```

```
kableExtra::kbl(Fst.gt$pairwise$result[order(Fst.gt$pairwise$result$Fst,
  decreasing = TRUE),
  -c(1:4)], digits = 4,
```

```
caption = "Pairwise Fst for 1924 DARtcap loci between the IWP sites (no JAP/FIJ and with subset of
longtable = TRUE, booktabs = TRUE) %>%
```

```
kableExtra::kable_styling(full_width = FALSE, font_size = 5,
  latex_options = c("repeat_header", "hold_position")) %>%
```

```
kableExtra::landscape()
```

Table 50: Pairwise Fst for 1924 DArTcap loci between the IWP sites (no JAP/FIJ and with subset of AUS)

|                                           | Chi2     | Chi2.p.val | D     | D.p.val | Fis      | Fis.p.val | Fst     | Fst.p.val | F'st    | F'st.p.val | Gst    | Gst.p.val | G'st   | G'st.p.val | G''st  | G''st.p.val |
|-------------------------------------------|----------|------------|-------|---------|----------|-----------|---------|-----------|---------|------------|--------|-----------|--------|------------|--------|-------------|
| Indonesia (4) v. Papua New Guinea (9)     | 1334.839 | 0.0589     | 7e-04 | 0.0370  | -6.7164  | 0.9730    | 0.0218  | 0.0430    | 0.0250  | 0.0430     | 0.2650 | 0.0310    | 0.3054 | 0.0340     | 0.4510 | 0.0330      |
| Indonesia (4) v. Seychelles (35)          | 1830.180 | 0.0190     | 5e-04 | 0.0220  | -2.2181  | 0.9770    | 0.0165  | 0.0120    | 0.0190  | 0.0120     | 0.0884 | 0.0100    | 0.1085 | 0.0110     | 0.1809 | 0.0100      |
| Indonesia (4) v. Thailand (4)             | 1079.938 | 0.3516     | 7e-04 | 0.3237  | -18.9626 | 0.6533    | 0.0161  | 0.3776    | 0.0184  | 0.3776     | 0.5845 | 0.3776    | 0.6236 | 0.3776     | 0.7625 | 0.3776      |
| Arabian Sea (15) v. Indonesia (4)         | 1528.321 | 0.0330     | 6e-04 | 0.0290  | -4.0712  | 0.9749    | 0.0159  | 0.0291    | 0.0182  | 0.0291     | 0.1610 | 0.0291    | 0.1921 | 0.0301     | 0.3041 | 0.0301      |
| Indonesia (4) v. Reunion (26)             | 1717.534 | 0.0390     | 6e-04 | 0.0480  | -3.0000  | 0.9538    | 0.0149  | 0.0392    | 0.0173  | 0.0392     | 0.1165 | 0.0452    | 0.1414 | 0.0472     | 0.2310 | 0.0472      |
| Indonesia (4) v. Mozambique (9)           | 1307.929 | 0.1868     | 6e-04 | 0.0939  | -6.3804  | 0.8108    | 0.0142  | 0.0750    | 0.0169  | 0.0742     | 0.2569 | 0.2358    | 0.2976 | 0.2461     | 0.4411 | 0.2430      |
| Australia (54) v. Indonesia (4)           | 1973.169 | 0.0410     | 6e-04 | 0.0020  | -1.1134  | 0.9980    | 0.0142  | 0.0030    | 0.0162  | 0.0030     | 0.0495 | 0.0030    | 0.0619 | 0.0030     | 0.1062 | 0.0030      |
| Indonesia (4) v. Sri Lanka (11)           | 1355.726 | 0.1229     | 6e-04 | 0.0559  | -5.5080  | 0.9570    | 0.0140  | 0.0639    | 0.0160  | 0.0639     | 0.2153 | 0.0589    | 0.2518 | 0.0589     | 0.3844 | 0.0589      |
| Mozambique (9) v. Papua New Guinea (9)    | 1508.837 | 0.0030     | 3e-04 | 0.1219  | -3.6037  | 0.9990    | 0.0132  | 0.0020    | 0.0152  | 0.0020     | 0.1074 | 0.0020    | 0.1316 | 0.0020     | 0.2159 | 0.0020      |
| Indonesia (4) v. South Africa (22)        | 1583.104 | 0.1738     | 5e-04 | 0.0220  | -3.0250  | 0.9930    | 0.0109  | 0.0210    | 0.0125  | 0.0210     | 0.1180 | 0.0120    | 0.1432 | 0.0120     | 0.2337 | 0.0120      |
| Papua New Guinea (9) v. Reunion (26)      | 1804.936 | 0.0130     | 3e-04 | 0.0390  | -2.0813  | 0.9381    | 0.0076  | 0.0210    | 0.0088  | 0.0200     | 0.0446 | 0.0200    | 0.0559 | 0.0200     | 0.0961 | 0.0200      |
| Arabian Sea (15) v. Papua New Guinea (9)  | 1633.386 | 0.0010     | 3e-04 | 0.0270  | -2.6123  | 0.9560    | 0.0071  | 0.0040    | 0.0081  | 0.0040     | 0.0626 | 0.0040    | 0.0778 | 0.0040     | 0.1321 | 0.0040      |
| Mozambique (9) v. Reunion (26)            | 1891.018 | 0.0020     | 3e-04 | 0.0420  | -1.9940  | 0.2917    | 0.0069  | 0.0170    | 0.0080  | 0.0170     | 0.0443 | 0.0120    | 0.0557 | 0.0100     | 0.0957 | 0.0120      |
| Papua New Guinea (9) v. Sri Lanka (11)    | 1432.583 | 0.1319     | 3e-04 | 0.2837  | -3.3196  | 0.9500    | 0.0060  | 0.0250    | 0.0069  | 0.0250     | 0.0860 | 0.0240    | 0.1057 | 0.0240     | 0.1765 | 0.0240      |
| Australia (54) v. Reunion (26)            | 2304.753 | 0.0010     | 2e-04 | 0.0010  | -0.5943  | 0.8412    | 0.0056  | 0.0010    | 0.0065  | 0.0010     | 0.0077 | 0.0010    | 0.0098 | 0.0010     | 0.0174 | 0.0010      |
| Mozambique (9) v. Seychelles (35)         | 1914.374 | 0.0020     | 2e-04 | 0.1319  | -1.5864  | 0.0350    | 0.0056  | 0.0130    | 0.0064  | 0.0140     | 0.0330 | 0.0120    | 0.0418 | 0.0110     | 0.0724 | 0.0110      |
| Reunion (26) v. Seychelles (35)           | 2114.155 | 0.0010     | 1e-04 | 0.0020  | -1.0778  | 0.9451    | 0.0053  | 0.0010    | 0.0061  | 0.0010     | 0.0124 | 0.0010    | 0.0158 | 0.0010     | 0.0279 | 0.0010      |
| Arabian Sea (15) v. Mozambique (9)        | 1641.319 | 0.0080     | 3e-04 | 0.0709  | -2.4872  | 0.3127    | 0.0049  | 0.0260    | 0.0057  | 0.0230     | 0.0605 | 0.0160    | 0.0756 | 0.0150     | 0.1283 | 0.0150      |
| Papua New Guinea (9) v. Seychelles (35)   | 1774.081 | 0.0230     | 3e-04 | 0.0100  | -1.7114  | 0.7393    | 0.0048  | 0.0210    | 0.0055  | 0.0210     | 0.0337 | 0.0190    | 0.0424 | 0.0200     | 0.0736 | 0.0190      |
| Reunion (26) v. South Africa (22)         | 1983.382 | 0.0010     | 2e-04 | 0.0010  | -1.2610  | 0.9870    | 0.0044  | 0.0050    | 0.0050  | 0.0050     | 0.0165 | 0.0050    | 0.0210 | 0.0050     | 0.0369 | 0.0050      |
| Reunion (26) v. Sri Lanka (11)            | 1814.081 | 0.0120     | 2e-04 | 0.2887  | -1.8398  | 0.9500    | 0.0044  | 0.0430    | 0.0050  | 0.0430     | 0.0335 | 0.0470    | 0.0421 | 0.0460     | 0.0732 | 0.0470      |
| Arabian Sea (15) v. Reunion (26)          | 1947.800 | 0.0010     | 2e-04 | 0.0589  | -1.5135  | 0.9421    | 0.0033  | 0.0589    | 0.0038  | 0.0589     | 0.0228 | 0.0619    | 0.0289 | 0.0619     | 0.0505 | 0.0619      |
| Australia (54) v. Mozambique (9)          | 1997.119 | 0.0280     | 2e-04 | 0.3057  | -0.8019  | 0.0150    | 0.0032  | 0.0400    | 0.0037  | 0.0400     | 0.0165 | 0.0430    | 0.0211 | 0.0380     | 0.0370 | 0.0410      |
| Mozambique (9) v. Sri Lanka (11)          | 1449.012 | 0.2138     | 3e-04 | 0.1209  | -3.2057  | 0.5754    | 0.0026  | 0.1628    | 0.0030  | 0.1728     | 0.0842 | 0.1159    | 0.1039 | 0.1129     | 0.1735 | 0.1139      |
| Australia (54) v. Papua New Guinea (9)    | 1827.823 | 0.3746     | 2e-04 | 0.0160  | -0.9249  | 0.9231    | 0.0020  | 0.1399    | 0.0023  | 0.1399     | 0.0176 | 0.0789    | 0.0224 | 0.0849     | 0.0393 | 0.0809      |
| Papua New Guinea (9) v. South Africa (22) | 1614.736 | 0.2517     | 3e-04 | 0.0430  | -2.0687  | 0.9461    | 0.0019  | 0.1878    | 0.0022  | 0.1878     | 0.0432 | 0.1179    | 0.0541 | 0.1209     | 0.0933 | 0.1209      |
| Mozambique (9) v. South Africa (22)       | 1631.674 | 0.3137     | 2e-04 | 0.5315  | -2.0358  | 0.2198    | 0.0017  | 0.2258    | 0.0019  | 0.2278     | 0.0438 | 0.1309    | 0.0552 | 0.1259     | 0.0949 | 0.1269      |
| Arabian Sea (15) v. South Africa (22)     | 1771.898 | 0.0190     | 2e-04 | 0.2907  | -1.5184  | 0.9520    | 0.0016  | 0.1289    | 0.0018  | 0.1289     | 0.0233 | 0.1089    | 0.0295 | 0.1119     | 0.0516 | 0.1099      |
| Arabian Sea (15) v. Australia (54)        | 2068.432 | 0.0010     | 1e-04 | 0.2168  | -0.5996  | 0.9411    | 0.0010  | 0.1718    | 0.0012  | 0.1718     | 0.0078 | 0.1409    | 0.0099 | 0.1419     | 0.0176 | 0.1419      |
| Arabian Sea (15) v. Seychelles (35)       | 1886.888 | 0.0080     | 1e-04 | 0.2697  | -1.2555  | 0.5355    | 0.0010  | 0.2378    | 0.0012  | 0.2378     | 0.0163 | 0.2567    | 0.0207 | 0.2577     | 0.0363 | 0.2577      |
| Australia (54) v. South Africa (22)       | 1970.053 | 0.0859     | 1e-04 | 0.0549  | -0.5473  | 0.3107    | 0.0005  | 0.2587    | 0.0006  | 0.2587     | 0.0053 | 0.2797    | 0.0067 | 0.2787     | 0.0120 | 0.2797      |
| Seychelles (35) v. Thailand (4)           | 1705.603 | 0.0979     | 4e-04 | 0.1618  | -2.0796  | 0.2700    | 0.0005  | 0.4290    | 0.0005  | 0.4290     | 0.0742 | 0.6640    | 0.0920 | 0.6410     | 0.1547 | 0.6540      |
| Seychelles (35) v. South Africa (22)      | 1865.330 | 0.0849     | 1e-04 | 0.3716  | -1.0063  | 0.0649    | 0.0004  | 0.3417    | 0.0005  | 0.3417     | 0.0102 | 0.3666    | 0.0130 | 0.3616     | 0.0230 | 0.3656      |
| Australia (54) v. Sri Lanka (11)          | 1880.911 | 0.2897     | 1e-04 | 0.4825  | -0.7601  | 0.9740    | 0.0003  | 0.4016    | 0.0003  | 0.4016     | 0.0117 | 0.3017    | 0.0149 | 0.3097     | 0.0263 | 0.3047      |
| Australia (54) v. Seychelles (35)         | 2054.899 | 0.0110     | 1e-04 | 0.0300  | -0.4074  | 0.9950    | 0.0002  | 0.3856    | 0.0002  | 0.3856     | 0.0029 | 0.3656    | 0.0037 | 0.3666     | 0.0066 | 0.3656      |
| South Africa (22) v. Sri Lanka (11)       | 1612.444 | 0.5534     | 2e-04 | 0.3057  | -1.8525  | 0.9181    | -0.0001 | 0.5205    | -0.0001 | 0.5205     | 0.0330 | 0.4336    | 0.0416 | 0.4466     | 0.0722 | 0.4426      |
| Seychelles (35) v. Sri Lanka (11)         | 1717.271 | 0.2478     | 1e-04 | 0.5295  | -1.5159  | 0.6593    | -0.0002 | 0.5305    | -0.0003 | 0.5305     | 0.0236 | 0.5375    | 0.0298 | 0.5375     | 0.0522 | 0.5385      |
| Papua New Guinea (9) v. Thailand (4)      | 1254.400 | 0.2298     | 4e-04 | 0.4356  | -5.7035  | 0.1330    | -0.0005 | 0.4760    | -0.0006 | 0.4760     | 0.2233 | 0.7660    | 0.2613 | 0.7370     | 0.3961 | 0.7440      |
| Arabian Sea (15) v. Sri Lanka (11)        | 1503.034 | 0.6863     | 2e-04 | 0.8232  | -2.3378  | 0.3007    | -0.0021 | 0.8771    | -0.0024 | 0.8771     | 0.0460 | 0.8761    | 0.0575 | 0.8731     | 0.0989 | 0.8721      |
| Sri Lanka (11) v. Thailand (4)            | 1276.722 | 0.4625     | 3e-04 | 0.8172  | -4.9286  | 0.0999    | -0.0032 | 0.7582    | -0.0036 | 0.7582     | 0.1875 | 0.9051    | 0.2220 | 0.8971     | 0.3448 | 0.9021      |
| Australia (54) v. Thailand (4)            | 1796.699 | 0.4376     | 3e-04 | 0.6623  | -1.0756  | 0.6853    | -0.0033 | 0.7922    | -0.0038 | 0.7922     | 0.0378 | 0.8242    | 0.0477 | 0.8092     | 0.0824 | 0.8172      |
| Reunion (26) v. Thailand (4)              | 1670.672 | 0.0689     | 4e-04 | 0.4106  | -2.6801  | 0.2305    | -0.0033 | 0.6854    | -0.0038 | 0.6854     | 0.0957 | 0.8457    | 0.1175 | 0.8307     | 0.1946 | 0.8357      |
| Arabian Sea (15) v. Thailand (4)          | 1371.048 | 0.4426     | 3e-04 | 0.6813  | -3.7791  | 0.1171    | -0.0052 | 0.8989    | -0.0059 | 0.8989     | 0.1395 | 0.9690    | 0.1682 | 0.9620     | 0.2701 | 0.9640      |
| South Africa (22) v. Thailand (4)         | 1491.926 | 0.5934     | 4e-04 | 0.4416  | -2.7460  | 0.3227    | -0.0063 | 0.9451    | -0.0072 | 0.9451     | 0.0985 | 0.9650    | 0.1208 | 0.9650     | 0.1996 | 0.9660      |
| Mozambique (9) v. Thailand (4)            | 1174.486 | 0.8771     | 4e-04 | 0.8801  | -5.8031  | 0.0738    | -0.0078 | 0.9108    | -0.0090 | 0.9108     | 0.2277 | 0.9713    | 0.2668 | 0.9682     | 0.4028 | 0.9713      |

## 12.8 PCA

```
pca1 <- adegenet::glPca(BS.dartcap.IWP2.gl, nf = 5, parallel = TRUE,  
                        n.cores = parallel::detectCores() - 1)  
save(pca1, file = "DARtcap_IWP2_PCA.Rdata")
```

```
load("DARtcap_IWP2_PCA.Rdata")
```

```
BS.pca.scores <- as.data.frame(pca1$scores)  
BS.pca.scores$pop <- pop(BS.dartcap.IWP2.gl)  
cols <- adegenet::funky(nPop(BS.dartcap.IWP2.gl))
```

```
p <-  
ggplot2::ggplot(BS.pca.scores, ggplot2::aes(x = PC1, y = PC2, colour = pop)) +  
ggplot2::geom_point(size = 2) + ggplot2::scale_color_manual(values = cols) +  
ggplot2::geom_hline(yintercept = 0) + ggplot2::geom_vline(xintercept = 0) +  
ggplot2::theme_minimal() +  
ggplot2::theme(  
  axis.text = ggplot2::element_text(size = 5),  
  axis.title.x = ggplot2::element_text(size = 10),  
  axis.title.y = ggplot2::element_text(size = 10),  
  legend.text = ggplot2::element_text(size = 7)  
)  
p
```

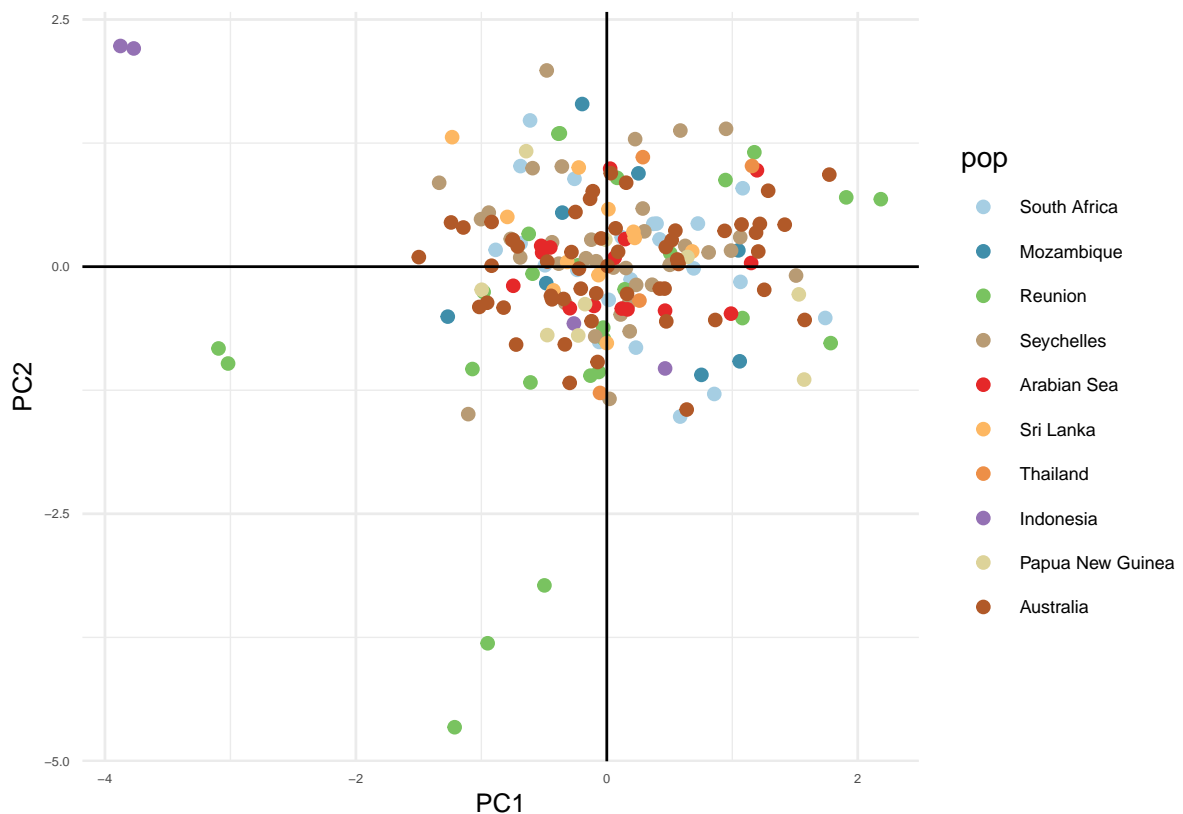

```
ggplot2::ggsave(p, filename = "DARtcap_IWP2_PCA1.png", width = 30,  
                height = 15, units = "cm")
```

```
p <-  
ggplot2::ggplot(BS.pca.scores, ggplot2::aes(x = PC1, y = PC3, colour = pop)) +
```

```

ggplot2::geom_point(size = 2) + ggplot2::scale_color_manual(values = cols) +
ggplot2::geom_hline(yintercept = 0) + ggplot2::geom_vline(xintercept = 0) +
ggplot2::theme_minimal() +
ggplot2::theme(
  axis.text = ggplot2::element_text(size = 5),
  axis.title.x = ggplot2::element_text(size = 10),
  axis.title.y = ggplot2::element_text(size = 10),
  legend.text = ggplot2::element_text(size = 7)
)

```

p

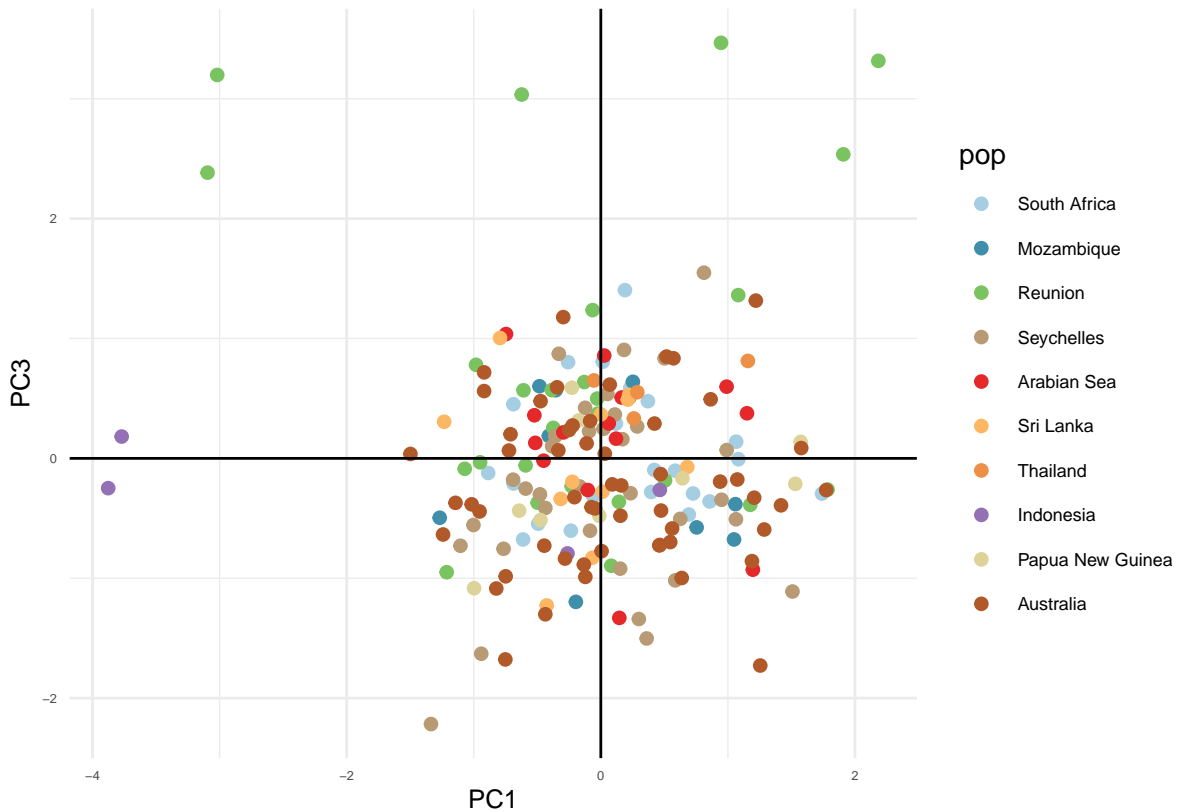

```

ggplot2::ggsave(p, filename = "DArTcap_IWP2_PCA2.png", width = 30,
  height = 15, units = "cm")

```

```

p <-
ggplot2::ggplot(BS.pca.scores, ggplot2::aes(x = PC2, y = PC3, colour = pop)) +
ggplot2::geom_point(size = 2) + ggplot2::scale_color_manual(values = cols) +
ggplot2::geom_hline(yintercept = 0) + ggplot2::geom_vline(xintercept = 0) +
ggplot2::theme_minimal() +
ggplot2::theme(
  axis.text = ggplot2::element_text(size = 5),
  axis.title.x = ggplot2::element_text(size = 10),
  axis.title.y = ggplot2::element_text(size = 10),
  legend.text = ggplot2::element_text(size = 7)
)

```

p



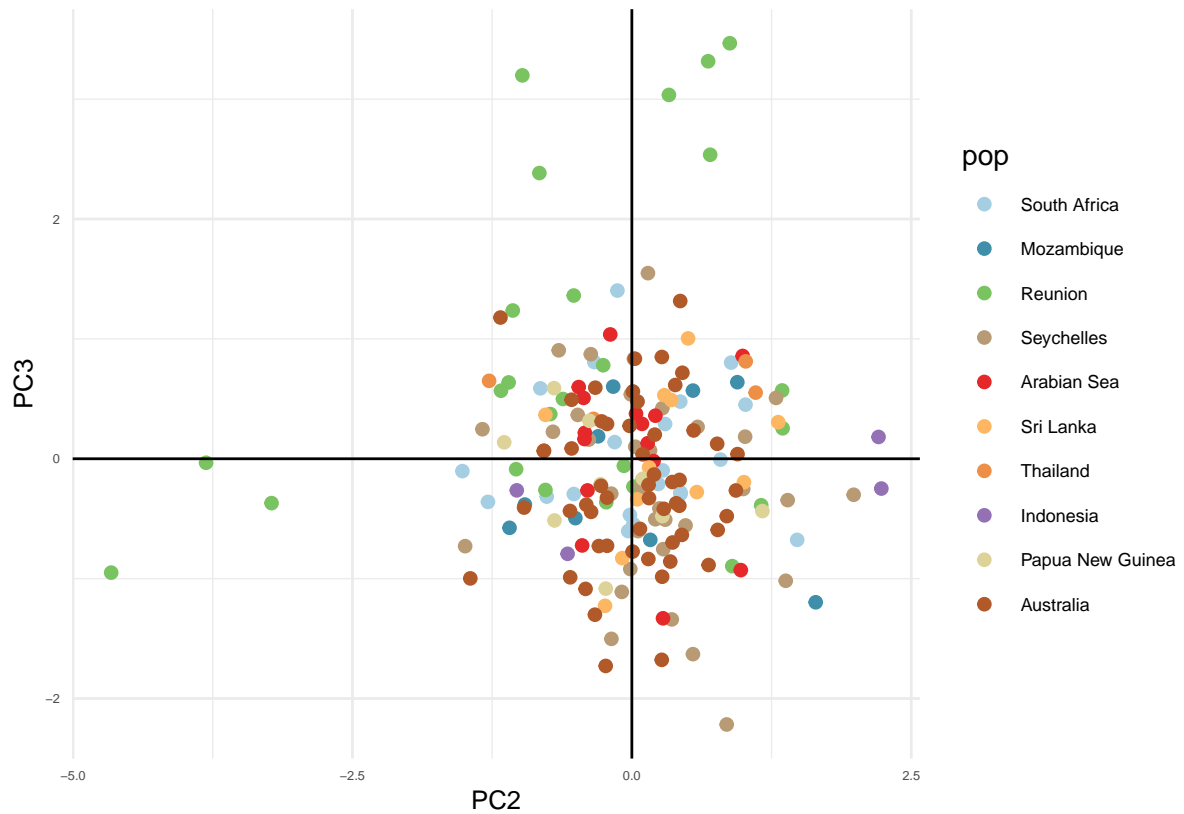

```
ggplot2::ggsave(p, filename = "DArTcap_IWP2_PCA3.png", width = 30,
  height = 15, units = "cm")
```

```
p <-
ggplot2::ggplot(BS.pca.scores, ggplot2::aes(x = PC3, y = PC4, colour = pop)) +
ggplot2::geom_point(size = 2) + ggplot2::scale_color_manual(values = cols) +
ggplot2::geom_hline(yintercept = 0) + ggplot2::geom_vline(xintercept = 0) +
ggplot2::theme_minimal() +
ggplot2::theme(
  axis.text = ggplot2::element_text(size = 5),
  axis.title.x = ggplot2::element_text(size = 10),
  axis.title.y = ggplot2::element_text(size = 10),
  legend.text = ggplot2::element_text(size = 7)
)
p
```

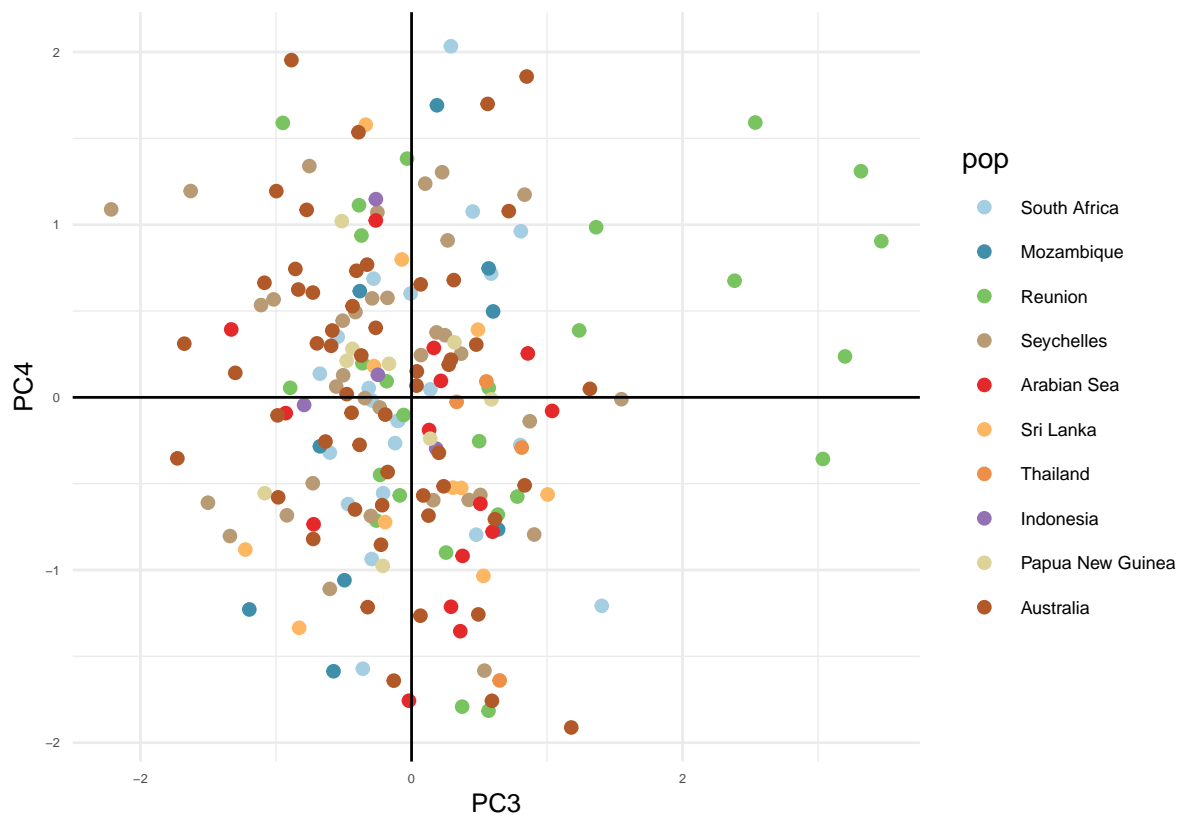

```
ggplot2::ggsave(p, filename = "DArTcap_IWP2_PCA4.png", width = 30,
  height = 15, units = "cm")

p <-
ggplot2::ggplot(BS.pca.scores, ggplot2::aes(x = PC3, y = PC5, colour = pop)) +
ggplot2::geom_point(size = 2) + ggplot2::scale_color_manual(values = cols) +
ggplot2::geom_hline(yintercept = 0) + ggplot2::geom_vline(xintercept = 0) +
ggplot2::theme_minimal() +
ggplot2::theme(
  axis.text = ggplot2::element_text(size = 5),
  axis.title.x = ggplot2::element_text(size = 10),
  axis.title.y = ggplot2::element_text(size = 10),
  legend.text = ggplot2::element_text(size = 7)
)
p
```

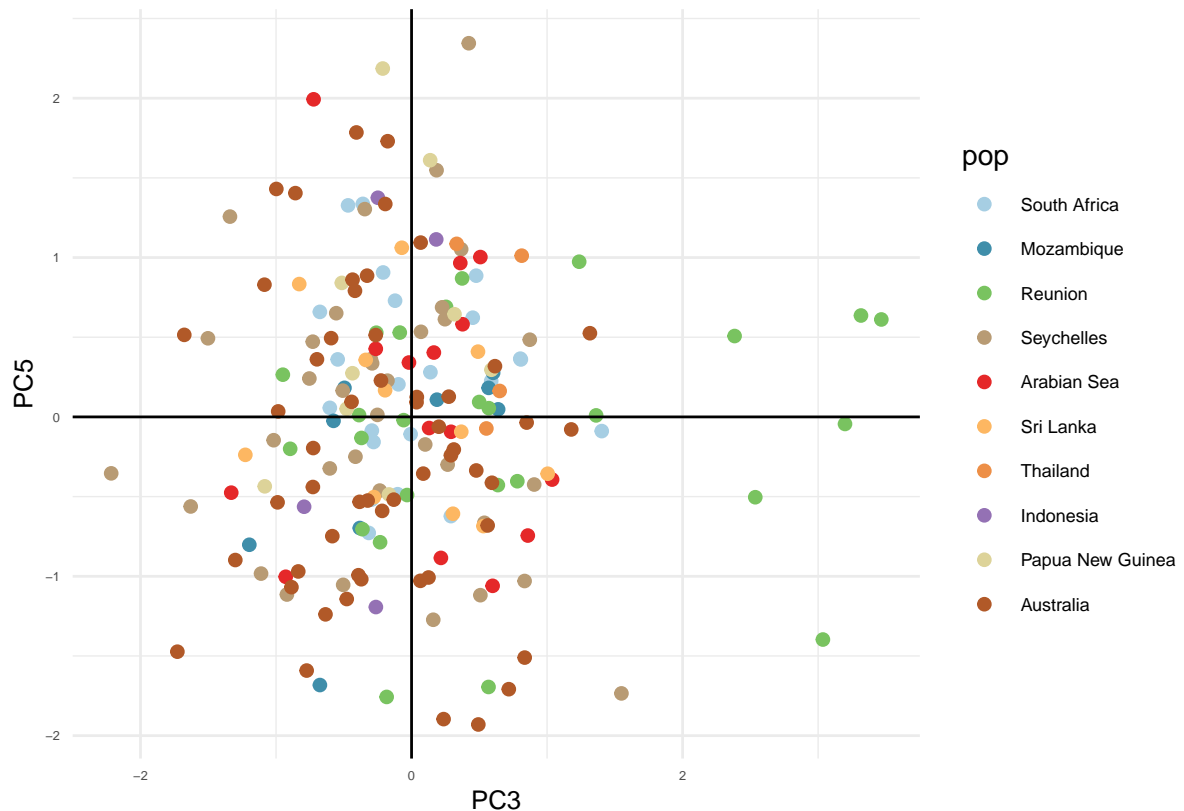

```
ggplot2::ggsave(p, filename = "DArTcap_IWP2_PCA5.png", width = 30,
  height = 15, units = "cm")
```

## 12.9 DAPC

### 12.9.1 Optimal number of clusters with neutral markers

```
set.seed(124)
grp <-
  adegenet::find.clusters(
    BS.dartcap.IWP2.g1,
    max.n.clust = 10,
    n.pca = adegenet::nInd(BS.dartcap.IWP2.g1) / 3,
    stat = "BIC",
    parallel = TRUE,
    n.cores = parallel::detectCores() - 1
  )
```

```
save(grp, file = "DArTcap_IWP2_grp.Rdata")
```

```
load("DArTcap_IWP2_grp.Rdata")
```

```
y <- as.numeric(grp$Kstat)
x <- 1:10
data <- data.frame(x,y,stringsAsFactors = F)
plot <- ggplot2::ggplot(data, ggplot2::aes(x,y)) +
  ggplot2::geom_point(size = 5, shape = 1, color = "blue") +
  ggplot2::geom_line(size = 1,color = "blue") +
  ggplot2::scale_x_continuous(name = waiver(),
    breaks = seq(from = 0,
      to = nrow(BS.dartcap.IWP2.g1) - 1,
```

```

                                by = 1)) +
ggplot2::labs(subtitle = "",
              y = "Bayesian Information Criterion",
              x = "Number of clusters",
              title = "",
              caption = "") +
ggplot2::theme_classic() +
ggplot2::theme(
  axis.text = ggplot2::element_text(size = 5),
  axis.title.x = ggplot2::element_text(size = 20,vjust = 0, hjust = 0.5),
  axis.title.y = ggplot2::element_text(size = 20,vjust = 2, hjust = 0.5))
print(plot)

```

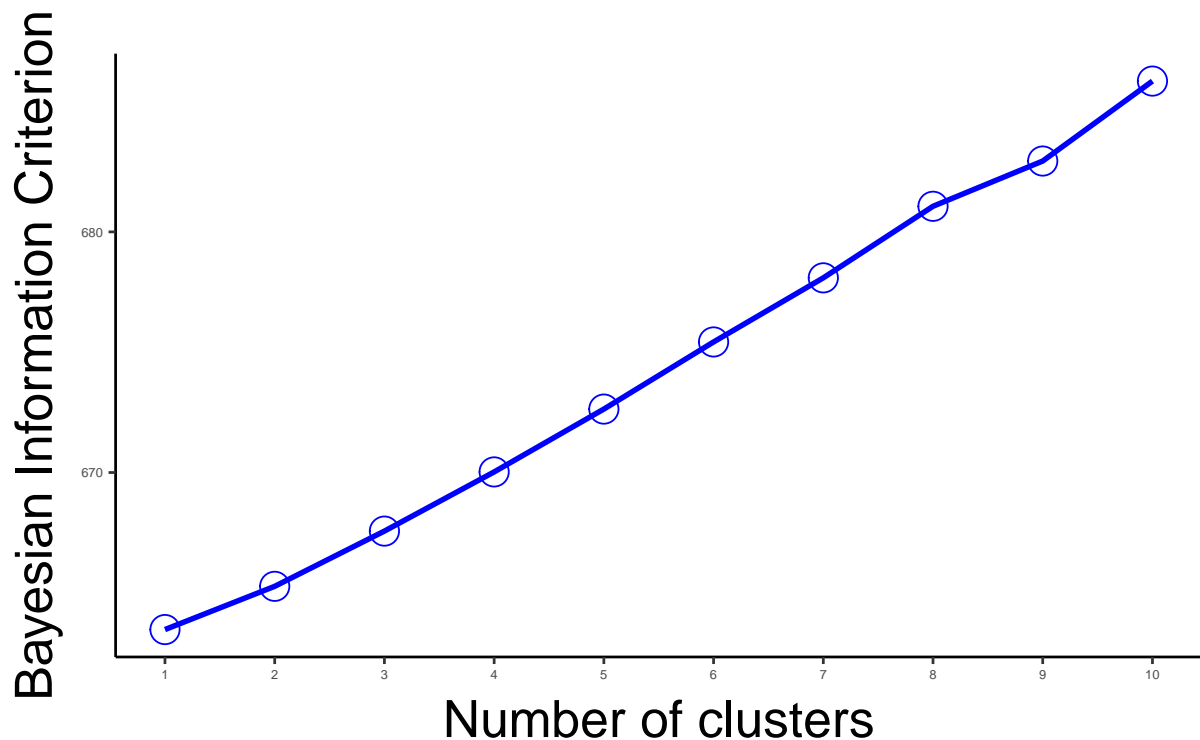

```

ggplot2::ggsave(plot, filename = "DArTcap_IWP2_grp.png", width = 30,
                 height = 15,units = "cm")

```

### 12.9.2 Cross-validation to identify the optimal number of PCs

Uses a training - holdout set of individuals to check how reliable individuals can be assigned.

```

set.seed(124)
x <- BS.dartcap.IWP2.g1
x$loc.names <- x$other$loc.metrics$MARKERS

xval <-
  adegenet::xvalDapc(
    tab(x, NA.method = "mean"),
    adegenet::pop(x),
    n.pca = seq(1, adegenet::nInd(x), by = 50),
    training.set = 0.9,
    result = "groupMean",
    center = TRUE,

```

```

scale = FALSE,
n.rep = 1000,
parallel = "multicore",
ncpus = 1,
xval.plot = TRUE
)
print(xval[2:6])
PC <- as.numeric(xval$`Number of PCs Achieving Lowest MSE`)

#refine the analysis
set.seed(124)
png(file="DArTcap_IWP2_xval.png")
xval <-
  adegenet::xvalDapc(
    tab(x, NA.method = "mean"),
    adegenet::pop(x),
    n.pca = (PC - 15):(PC + 15),
    n.rep = 1000,
    parallel = "multicore",
    ncpus = 1,
    xval.plot = TRUE
  )
dev.off()
save(xval, file = "DArTcap_IWP2_xval.rdata")

load("DArTcap_IWP2_xval.rdata")
print(xval[2:6])
PC <- as.numeric(xval$`Number of PCs Achieving Lowest MSE`)

## $`Median and Confidence Interval for Random Chance`
##      2.5%      50%      97.5%
## 0.06180334 0.09925630 0.13873901
##
## $`Mean Successful Assignment by Number of PCs of PCA`
##      36      37      38      39      40      41      42      43
## 0.1930960 0.2027357 0.1990421 0.2038611 0.2115881 0.2072631 0.2076766 0.2035103
##      44      45      46      47      48      49      50      51
## 0.2019516 0.2055075 0.2049619 0.2057060 0.2084857 0.2061317 0.2061722 0.2070675
##      52      53      54      55      56      57      58      59
## 0.2073901 0.2032528 0.2099532 0.2065258 0.2039921 0.2058381 0.2079246 0.2048988
##      60      61      62      63      64      65      66
## 0.2099571 0.2044837 0.2062091 0.2048567 0.2004135 0.1984770 0.2010897
##
## $`Number of PCs Achieving Highest Mean Success`
## [1] "40"
##
## $`Root Mean Squared Error by Number of PCs of PCA`
##      36      37      38      39      40      41      42      43
## 0.8095453 0.8002350 0.8037620 0.7990092 0.7914135 0.7955968 0.7953047 0.7994862
##      44      45      46      47      48      49      50      51
## 0.8008700 0.7974081 0.7978982 0.7972406 0.7942725 0.7966445 0.7966600 0.7956200
##      52      53      54      55      56      57      58      59
## 0.7955904 0.7998644 0.7930704 0.7964852 0.7991029 0.7970035 0.7948072 0.7979593
##      60      61      62      63      64      65      66
## 0.7929512 0.7983287 0.7964667 0.7979294 0.8022374 0.8045400 0.8018440
##
## $`Number of PCs Achieving Lowest MSE`
## [1] "40"

```

```

dapc.all.object.names <- c()
for (K in 2:10) {
  set.seed(124)
  grp <- adegenet::find.clusters(BS.dartcap.IWP2.gl, n.clust = K, n.pca = PC)
  set.seed(124)
  dapc.all.neutral <- adegenet::dapc(BS.dartcap.IWP2.gl, grp$grp, n.da = K - 1,
                                     n.pca = PC)
  assign(paste0("dapc.all.", K), value = dapc.all.neutral)
  dapc.all.object.names <- c(dapc.all.object.names,
                             paste0("dapc.all.", K))
}
save(list = dapc.all.object.names, dapc.all.object.names,
     file = "DARtcap_IWP2_DAPC.Rdata")

```

### 12.9.3 DAPC barplot

Group individuals according to DAPC posterior membership.

```

load("DARtcap_IWP2_DAPC.Rdata")
for (K in 2:10) {
  colour <- colours.prior[1:K]
  dapc <- get(dapc.all.object.names[K - 1])
  post <- as.matrix(dapc$posterior)
  colnames(post) <- paste0("Group", 1:nlevels(dapc$grp))
  locations <- BS.dartcap.IWP2.gl$pop

  plot.dapc.FDD(x = post,
                locations = locations,
                colour = colour,
                region.lwd = 1,
                plotTitle = paste0("DAPC: all Bull Sharks - subset Australia\n for K=",
                                   K, " & PC=", PC, sep = ""))

  dev.print(
    device = png,
    file = paste0("DARtcap_IWP2_DAPC_barplot_K", K, ".png"),
    res = 300,
    width = 30,
    height = 15,
    units = "cm")
}

```

## DAPC: all Bull Sharks – subset Australia for K=2 & PC=40

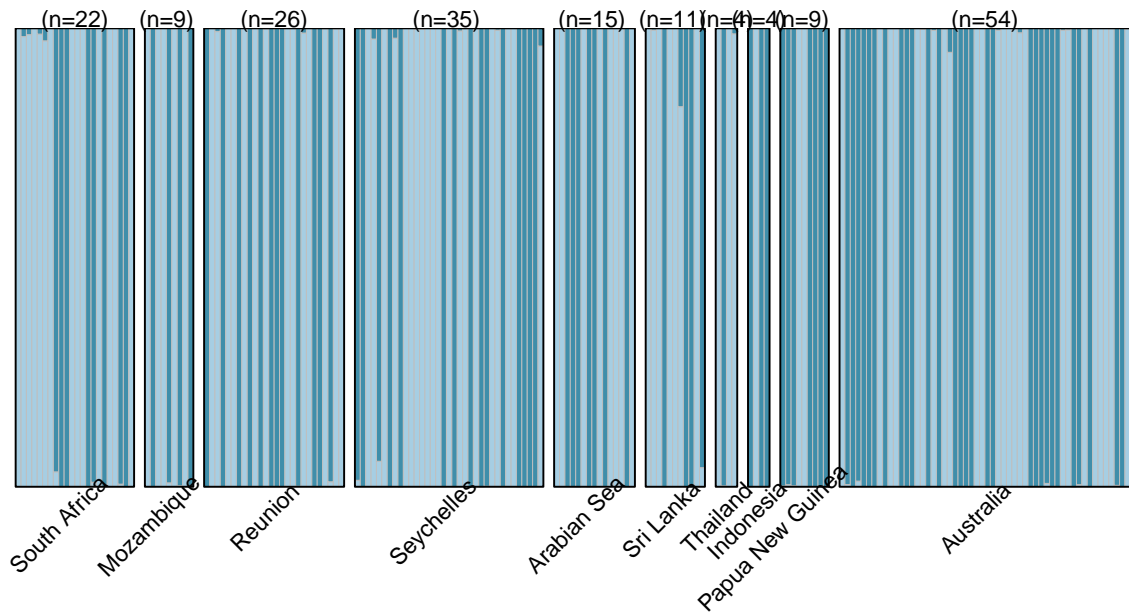

## DAPC: all Bull Sharks – subset Australia for K=3 & PC=40

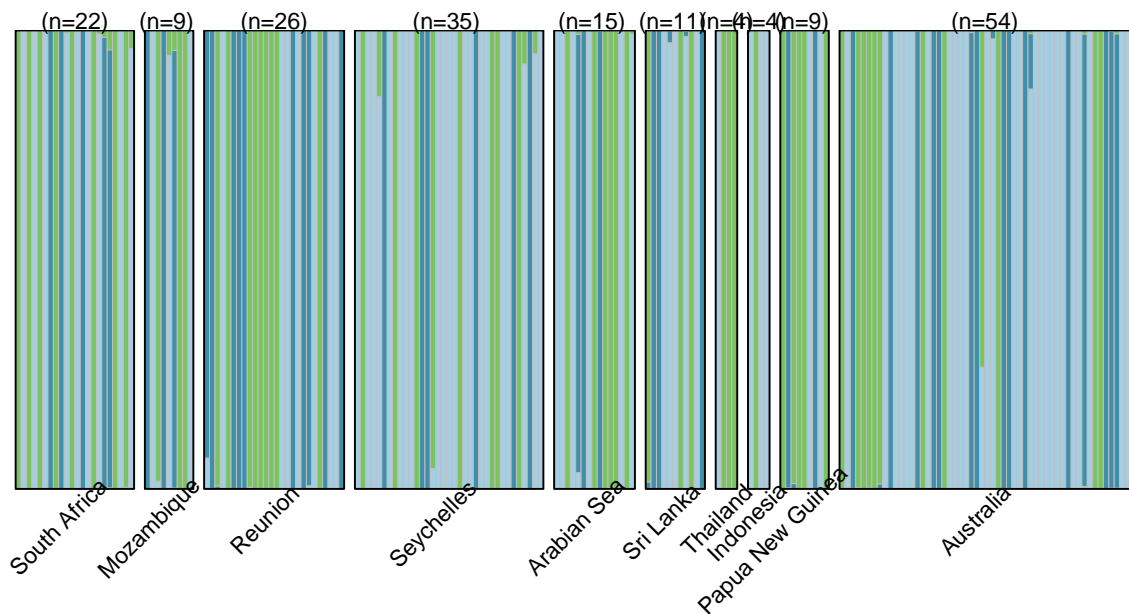

## DAPC: all Bull Sharks – subset Australia for K=4 & PC=40

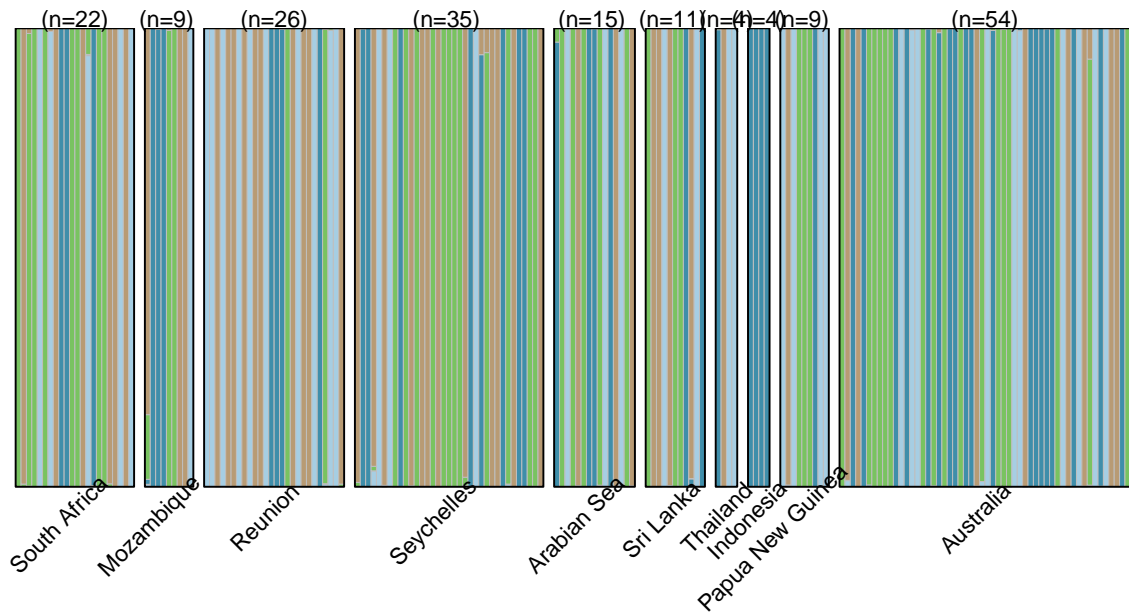

## DAPC: all Bull Sharks – subset Australia for K=5 & PC=40

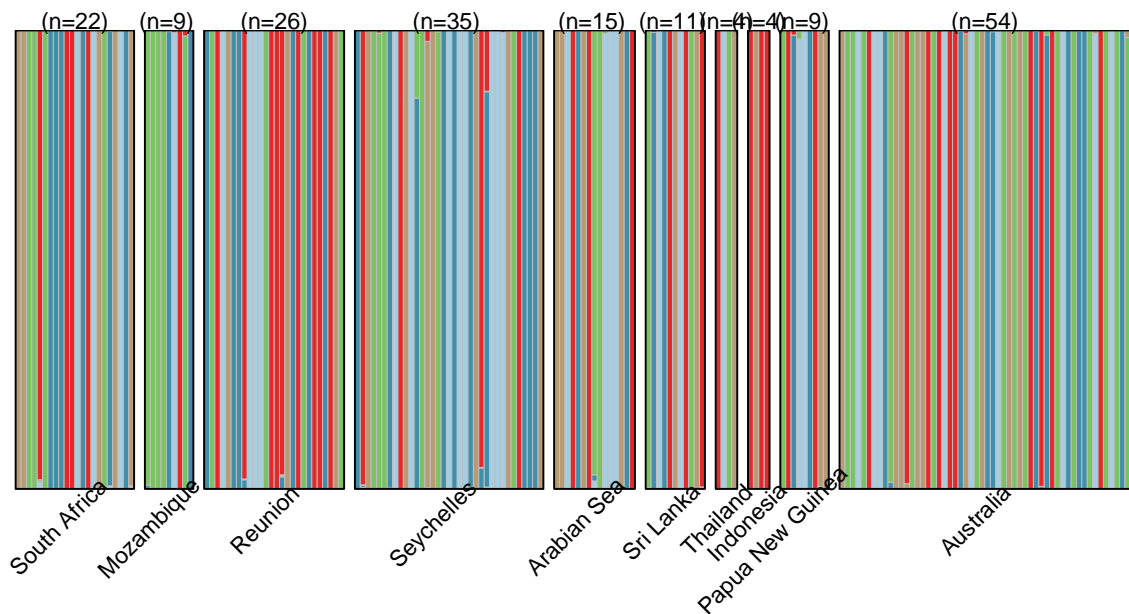



## DAPC: all Bull Sharks – subset Australia for K=6 & PC=40

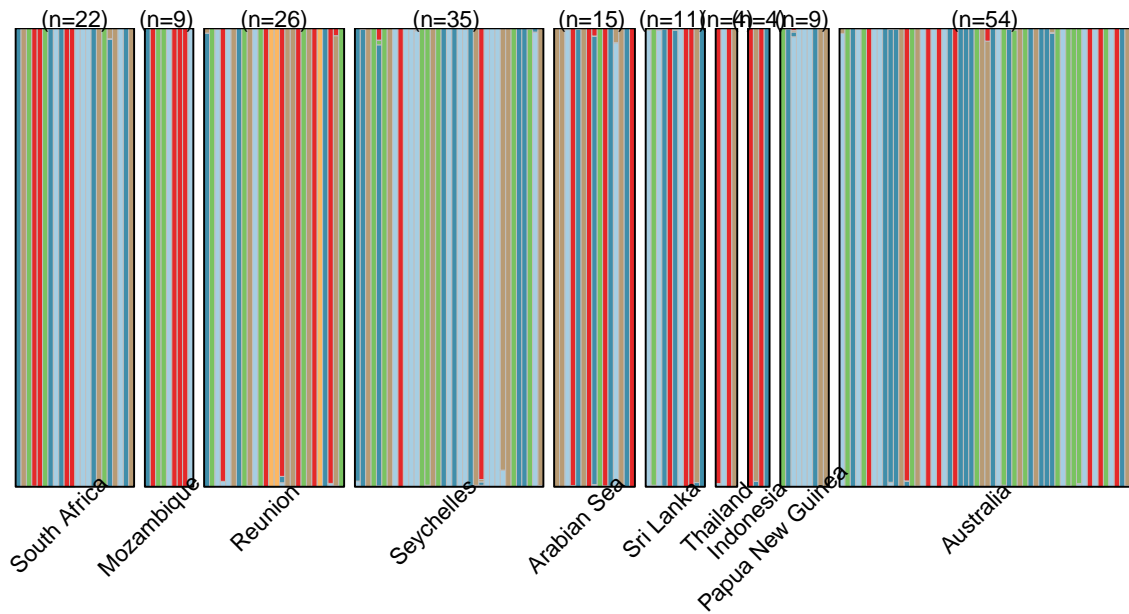

## DAPC: all Bull Sharks – subset Australia for K=7 & PC=40

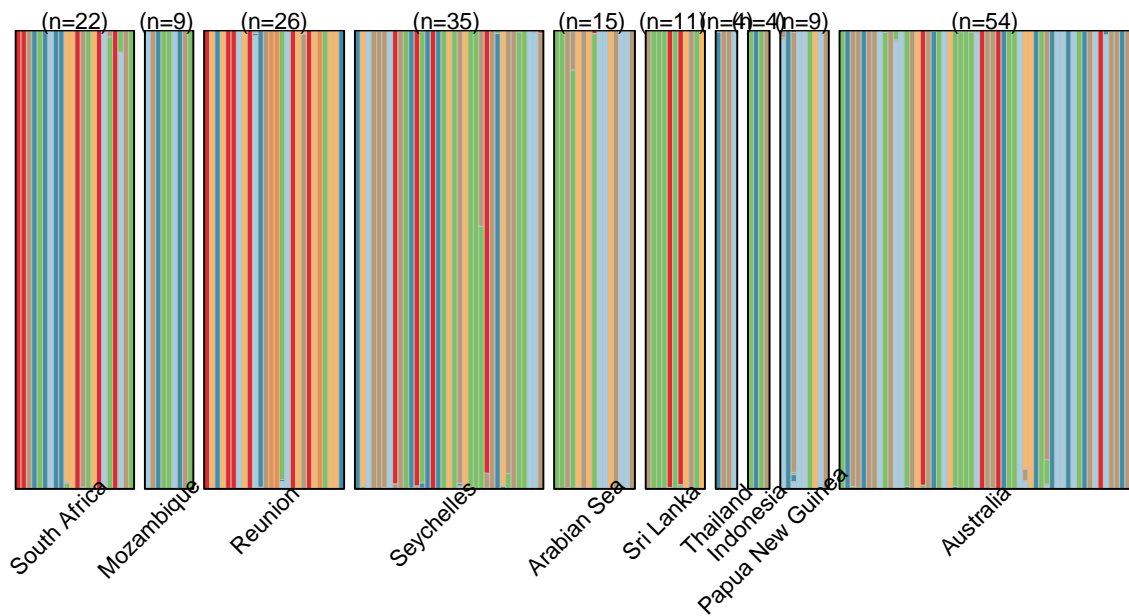

## DAPC: all Bull Sharks – subset Australia for K=8 & PC=40

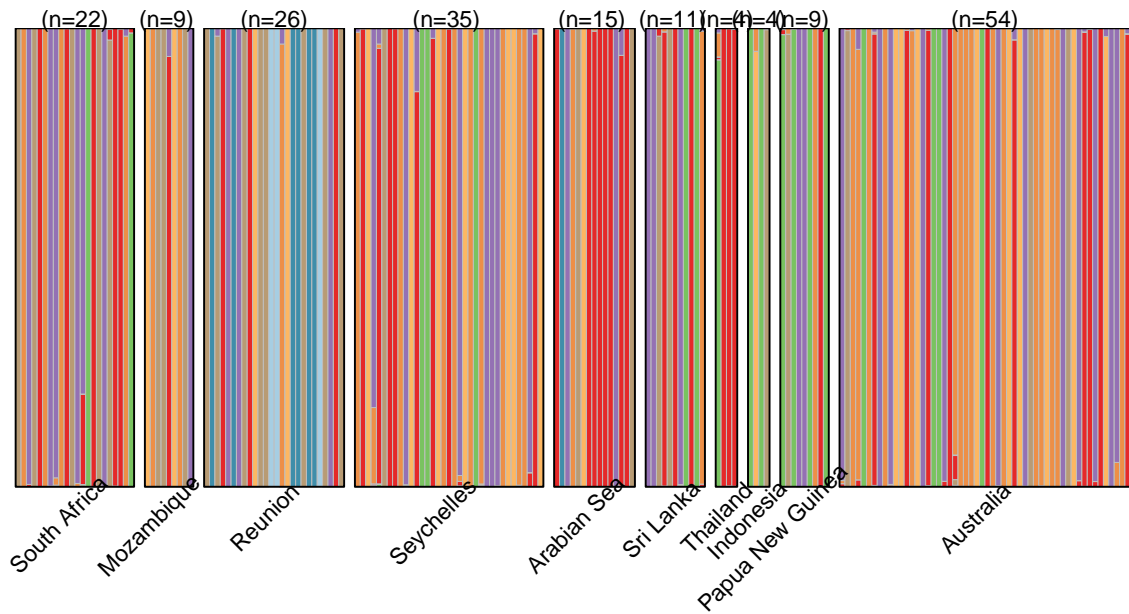

## DAPC: all Bull Sharks – subset Australia for K=9 & PC=40

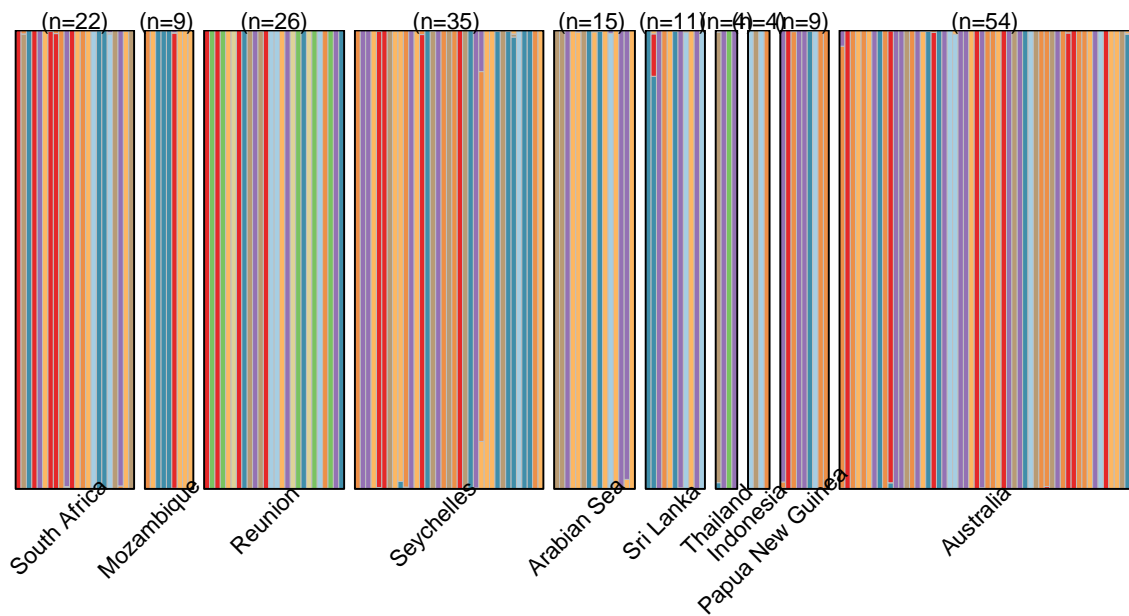

## DAPC: all Bull Sharks – subset Australia for K=10 & PC=40

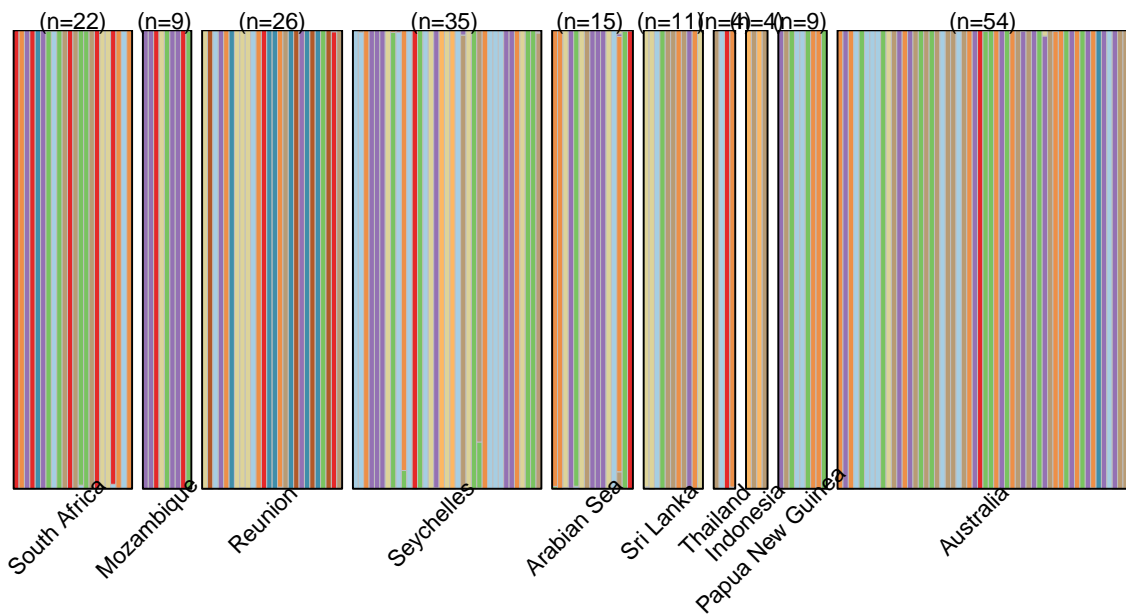

### 12.9.4 DAPC scatterplot

```
load("DArTcap_IWP2_DAPC.Rdata")

for (K in 3:10) {
  dapc <- get(dapc.all.object.names[K - 1])
  if (K == 2) {
    posi.leg <- "bottomright"
  } else {posi.leg <- "bottomleft"}
  dapc.plot <- ade4::scatter(dapc, grp = pop(BS.dartcap.IWP2.g1), cex = 2,
    legend = TRUE, col = colours.10, clabel = FALSE,
    posi.leg = posi.leg, scree.pca = FALSE,
    posi.pca = "topleft", cleg = 0.75, xax = 1,
    yax = 2, inset.solid = 0.3)

  dev.print(
    device = png,
    file = paste0("DArTcap_IWP2_DAPC_scatterplot_K", K, ".png"),
    width = 30,
    height = 15,
    units = "cm",
    res = 300
  )
}
```

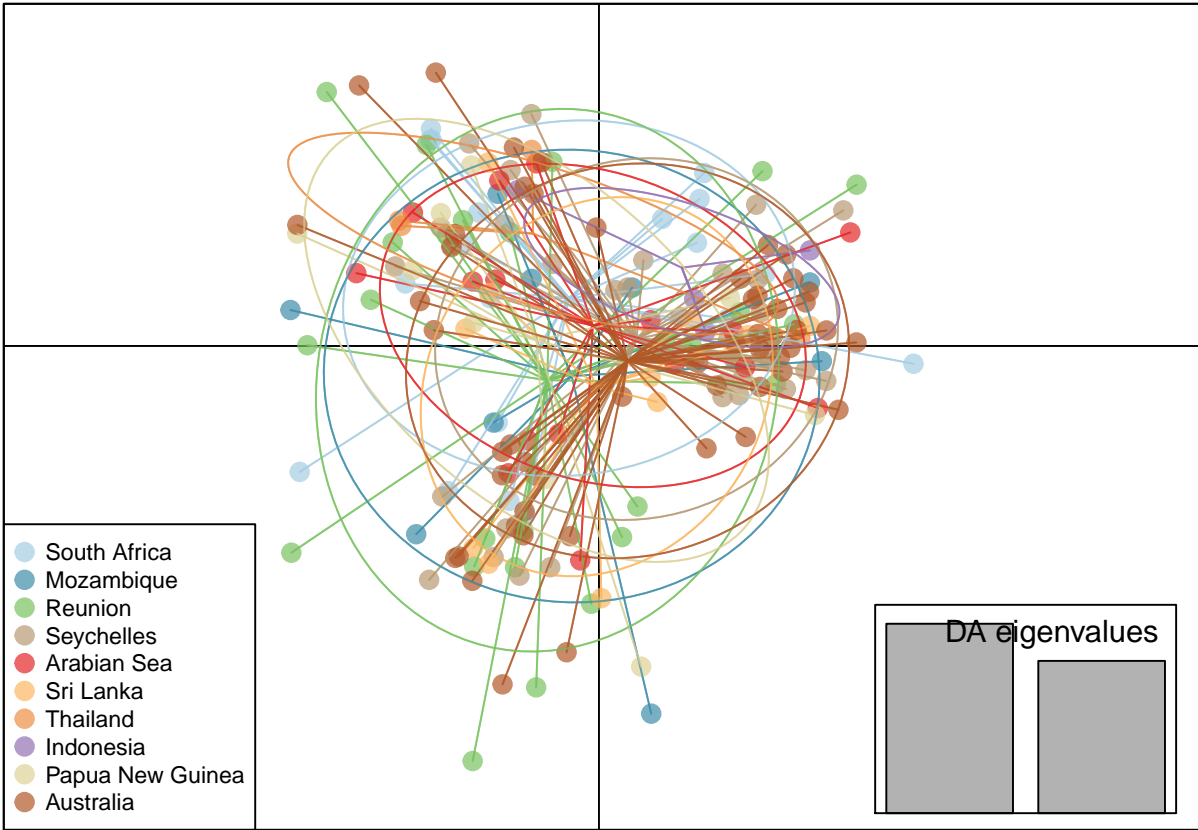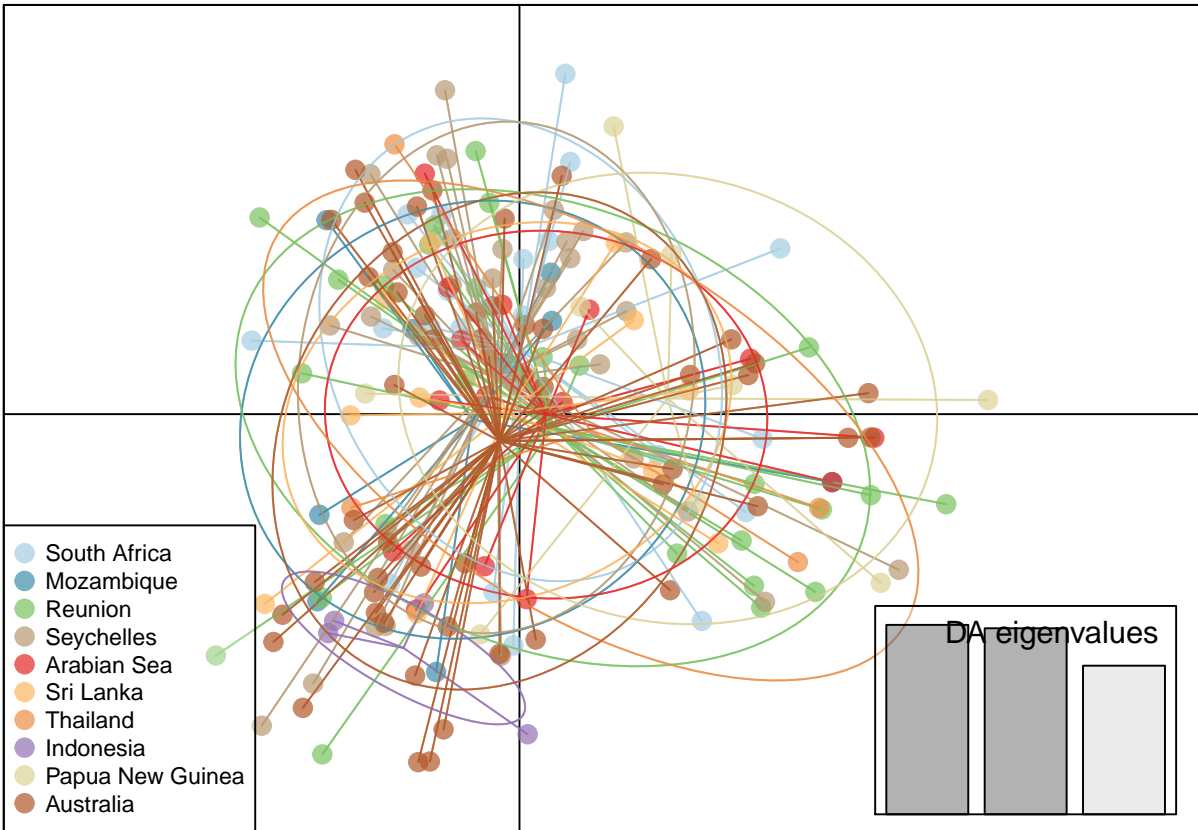

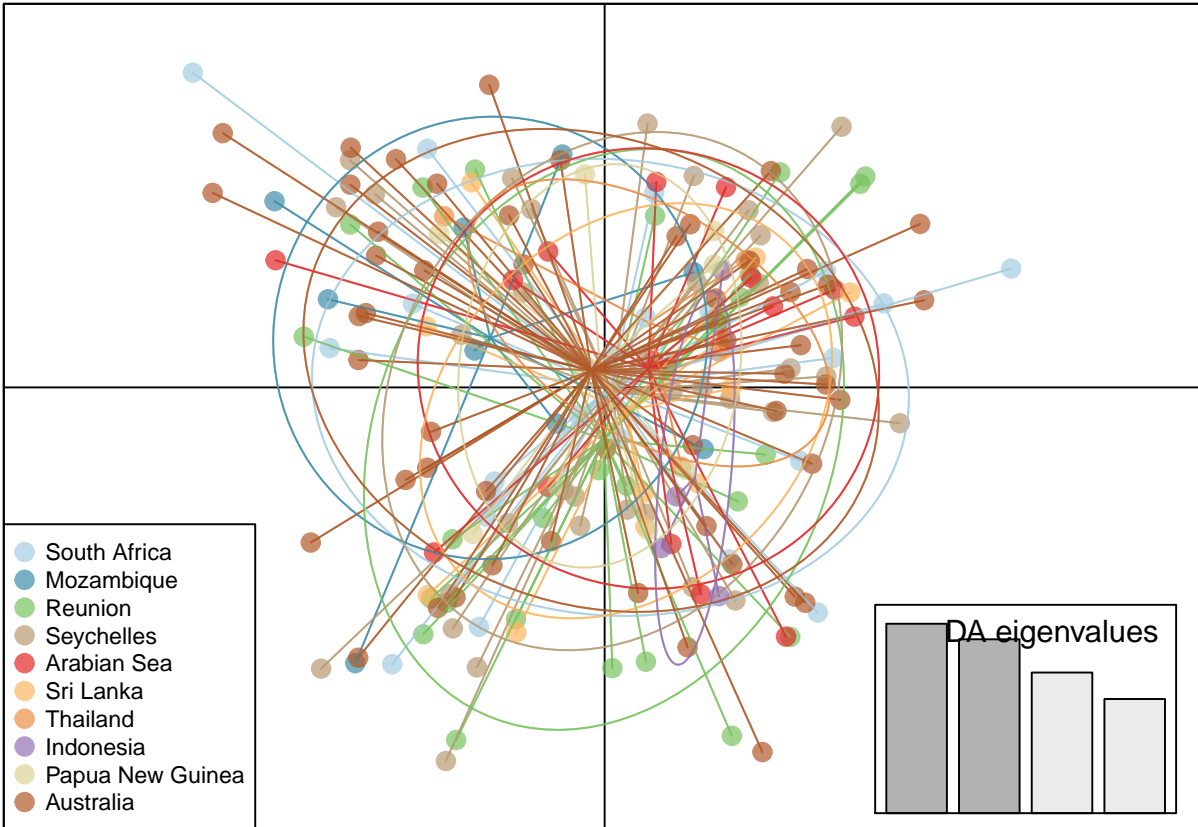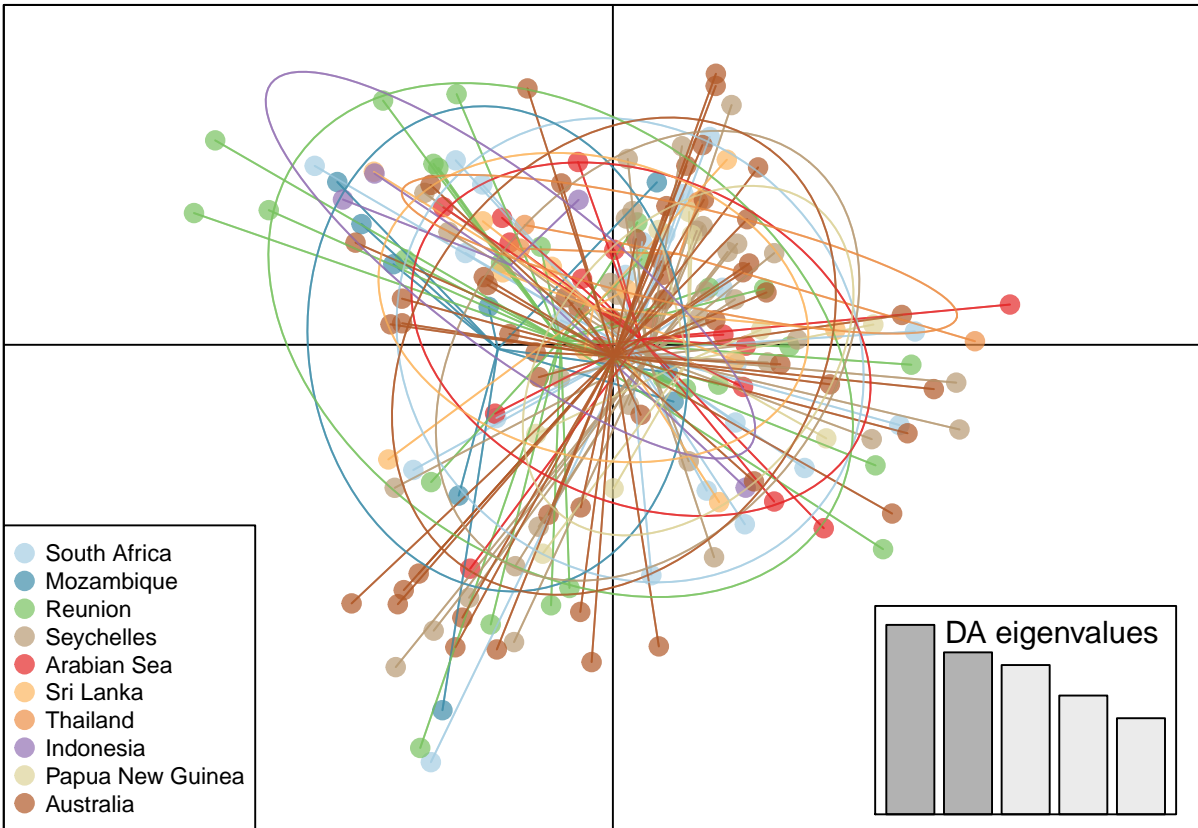

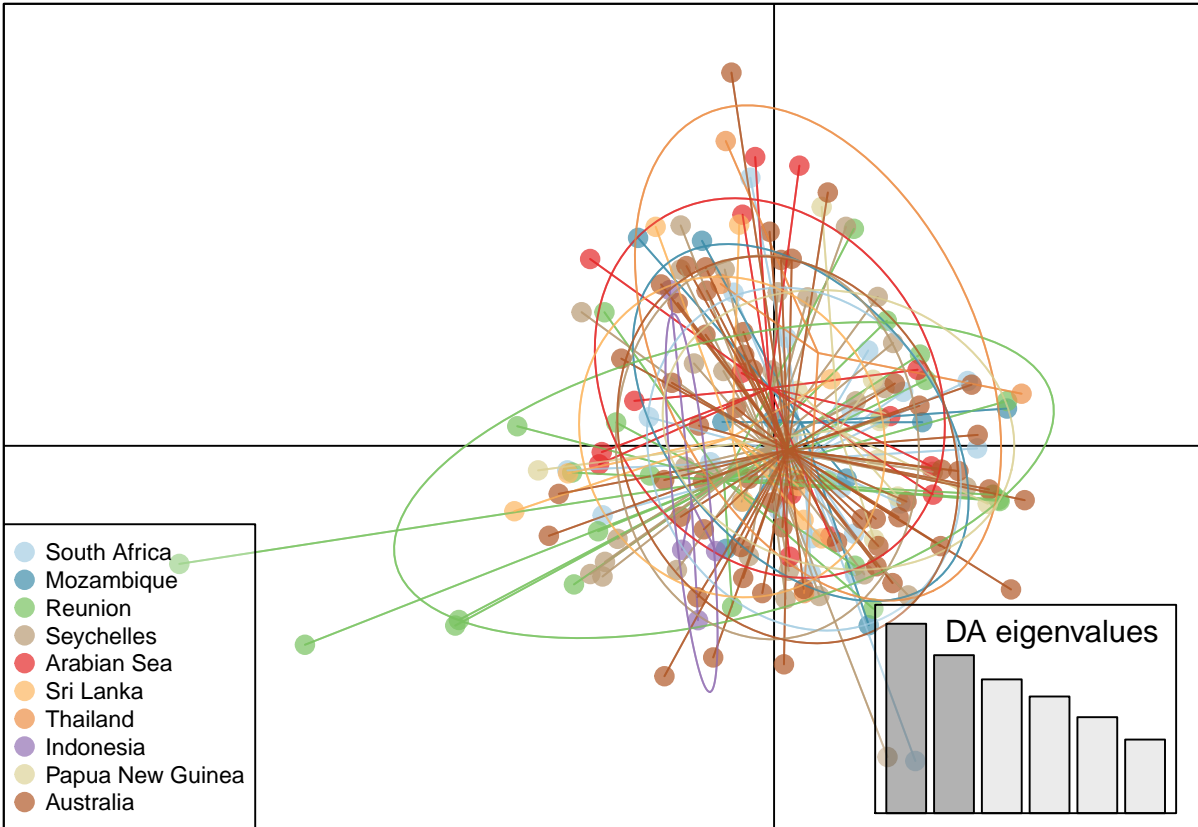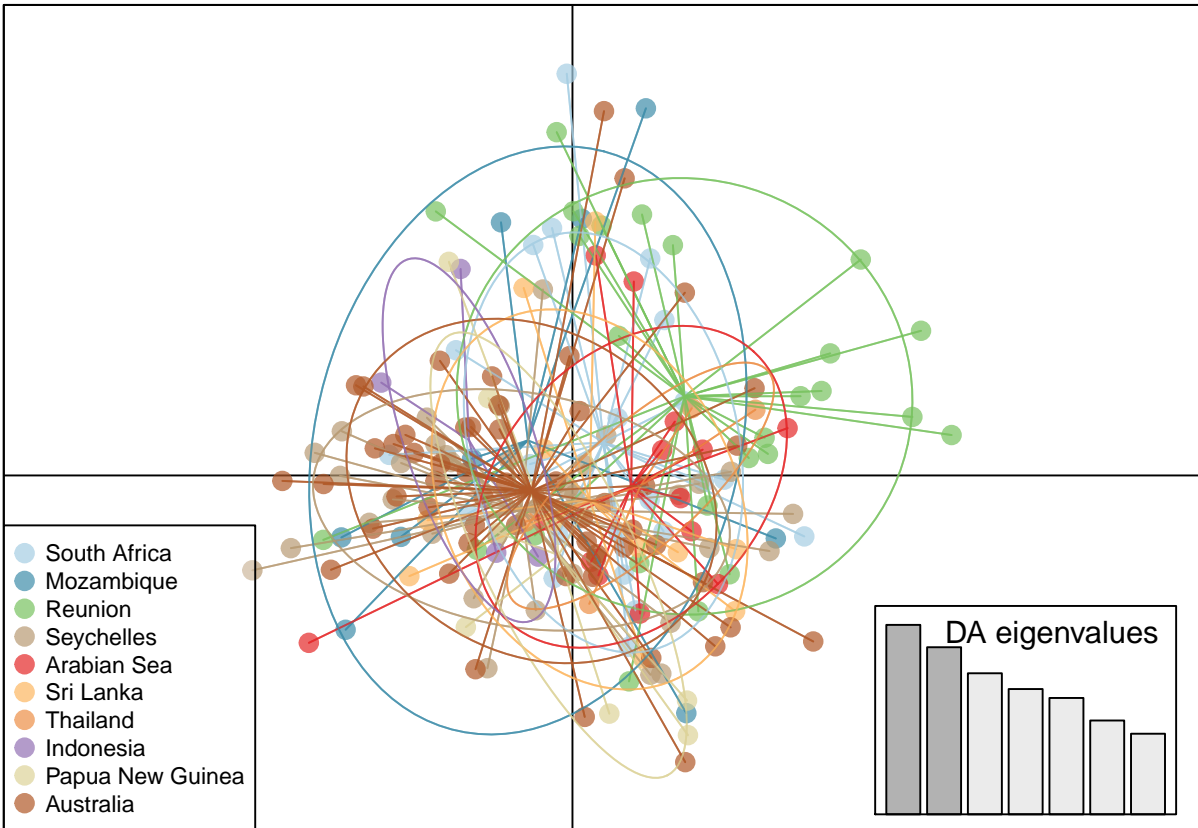

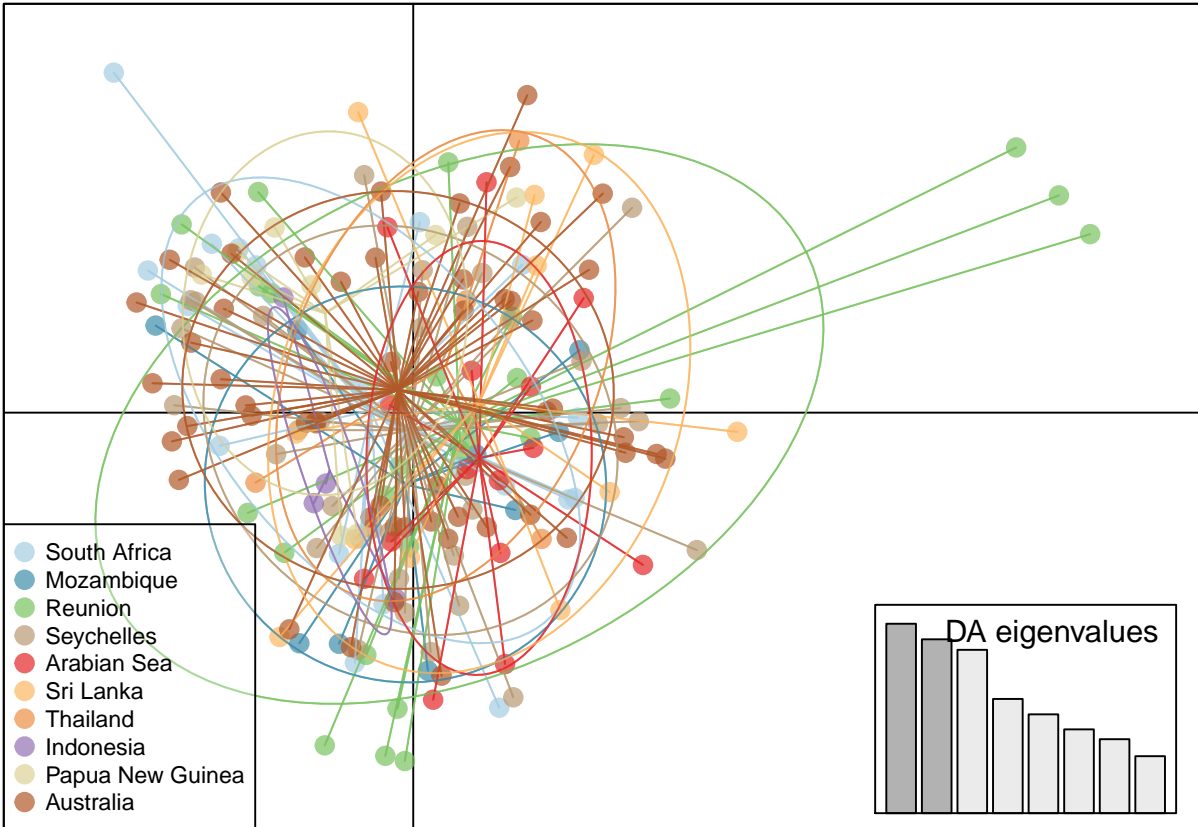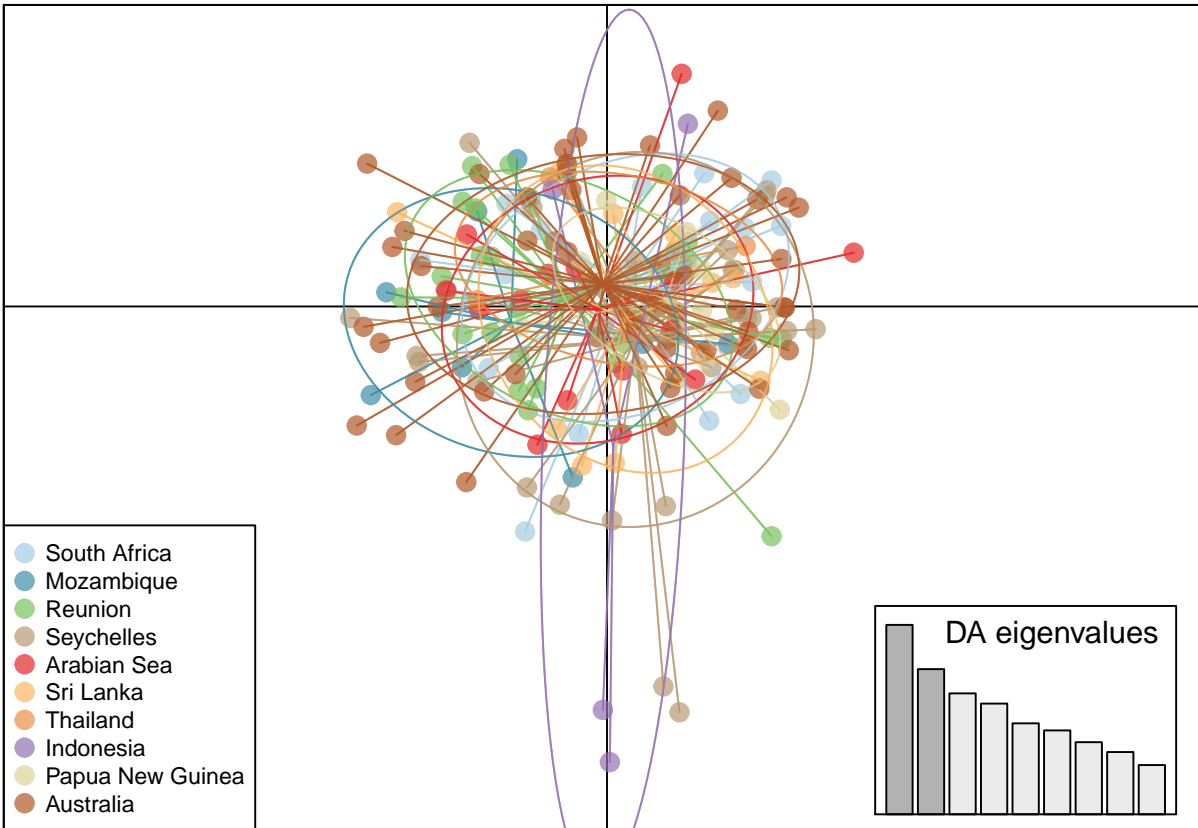

```

for (K in 2:10) {
  colour <- colours.prior[1:K]
  dapc <- get(dapc.all.object.names[K - 1])
  dapc.plot <- ade4::scatter(dapc, cex = 2, legend = TRUE, col = colour,
                             clabel = FALSE, posi.legend = "bottomleft",

```

```

        scree.pca = FALSE, posi.pca = "topleft",
        cleg = 0.75, xax = 1, yax = 2, inset.solid = 0.3)
dev.print(
  device = png,
  file = paste0("DArTcap_IWP2_DAPC_scatterplot_pergroups_K",
                K, ".png"),
  width = 30,
  height = 15,
  units = "cm",
  res = 300
)
}

```

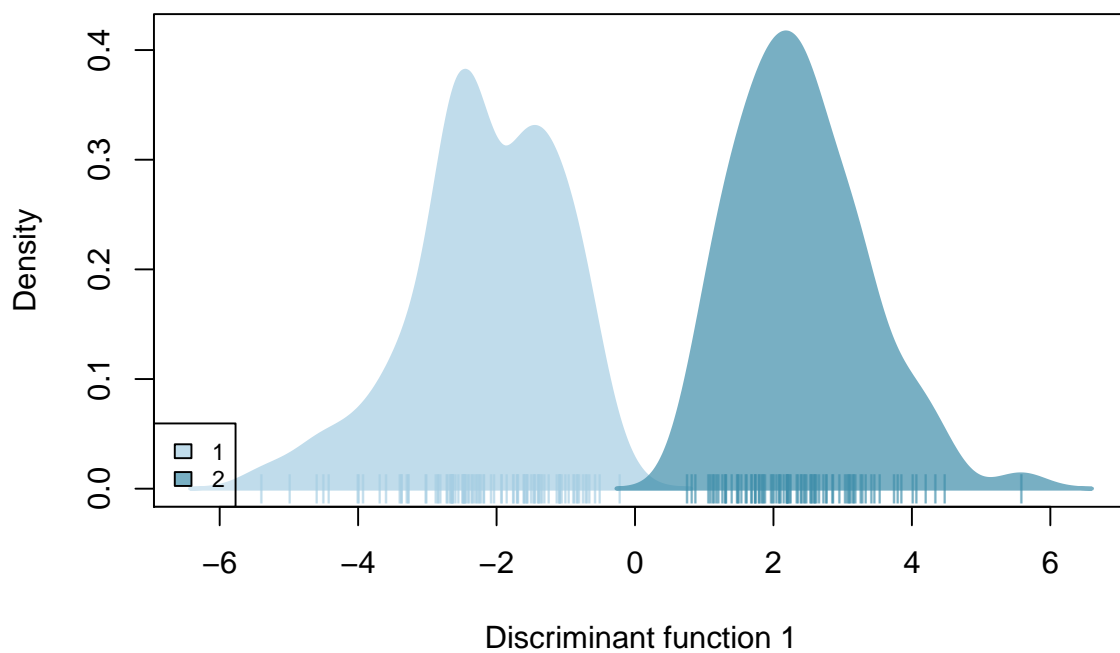



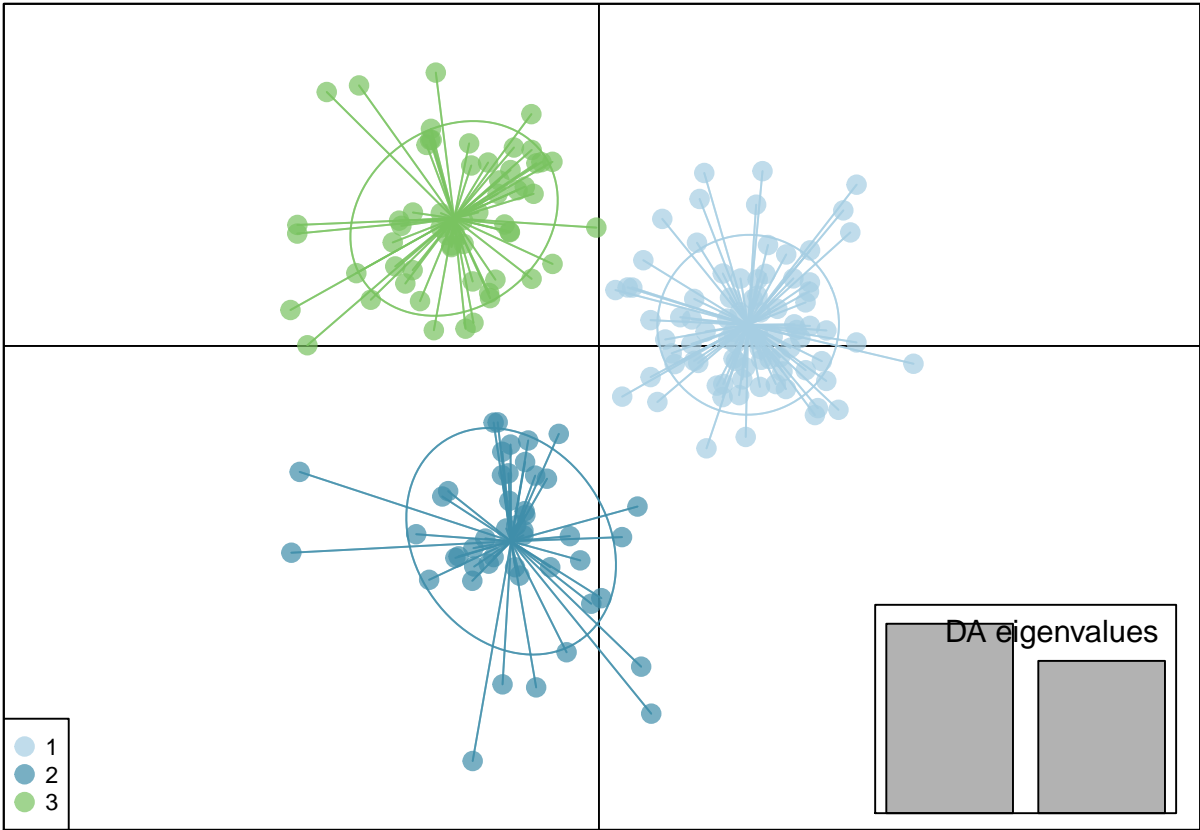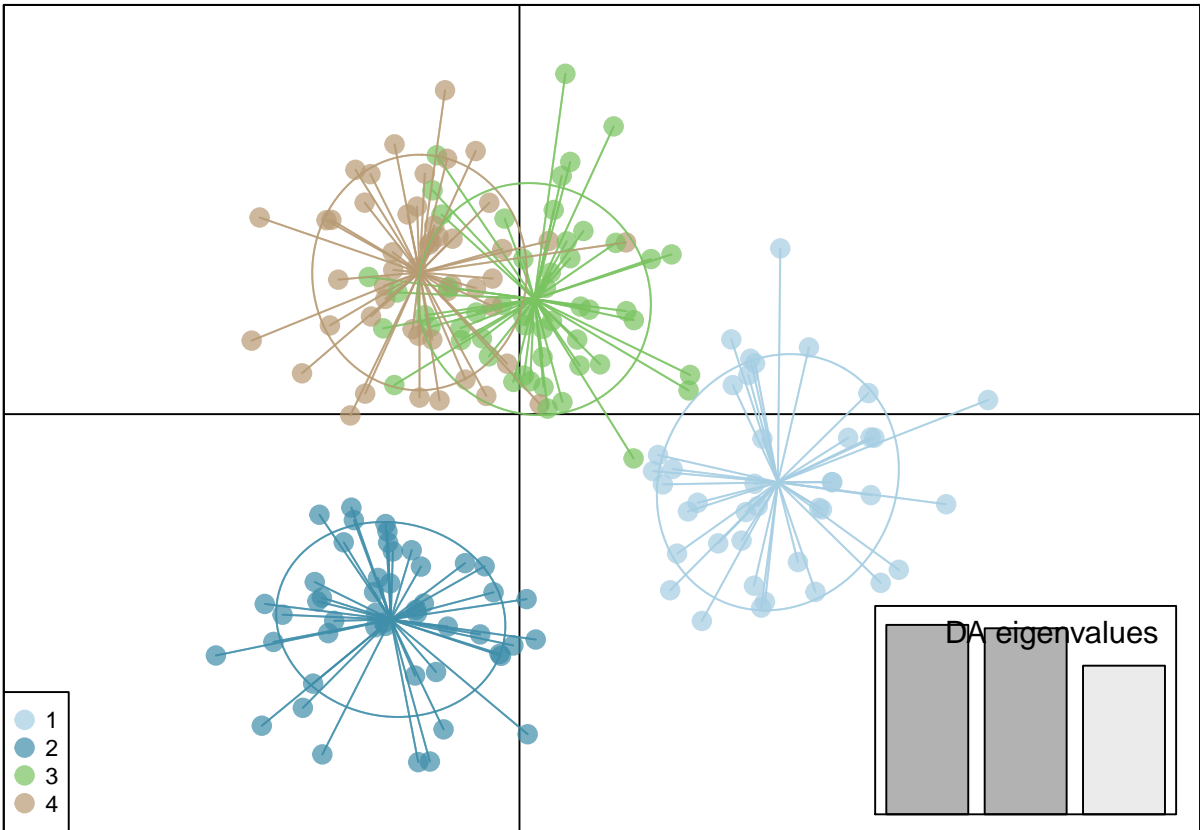

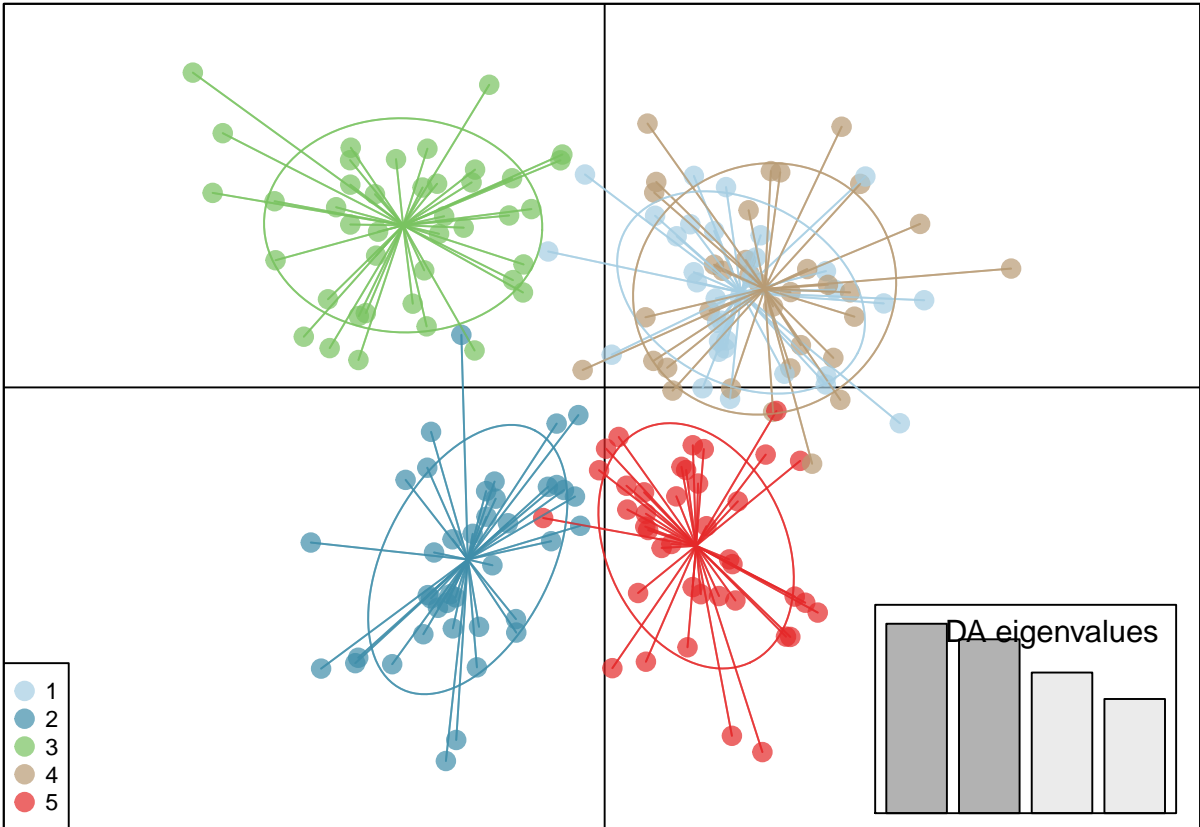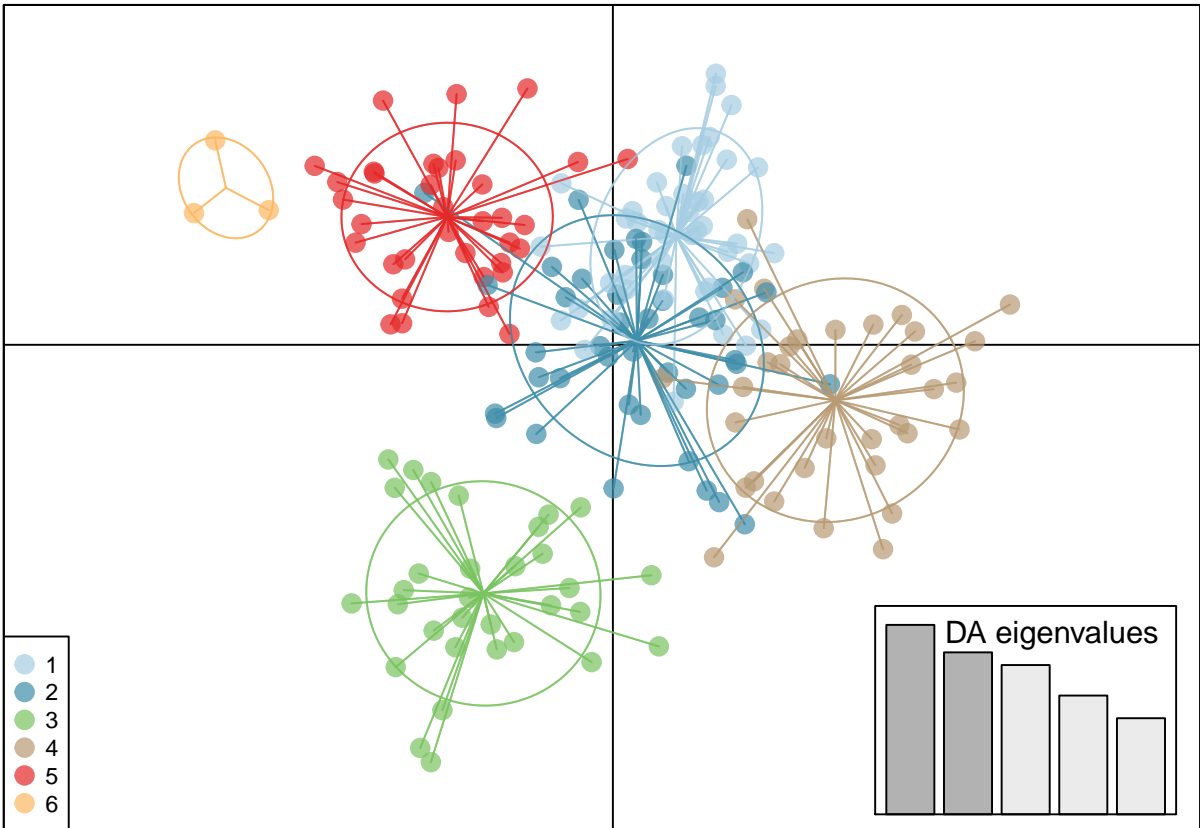

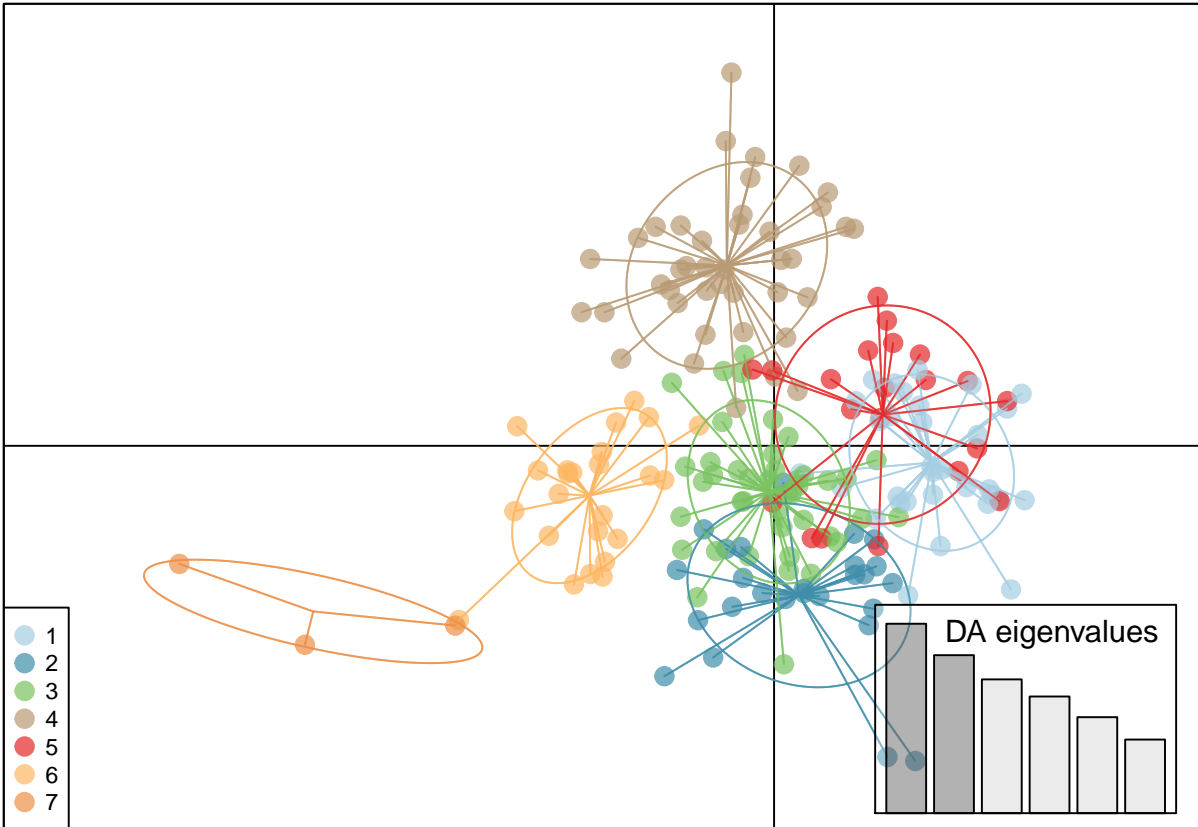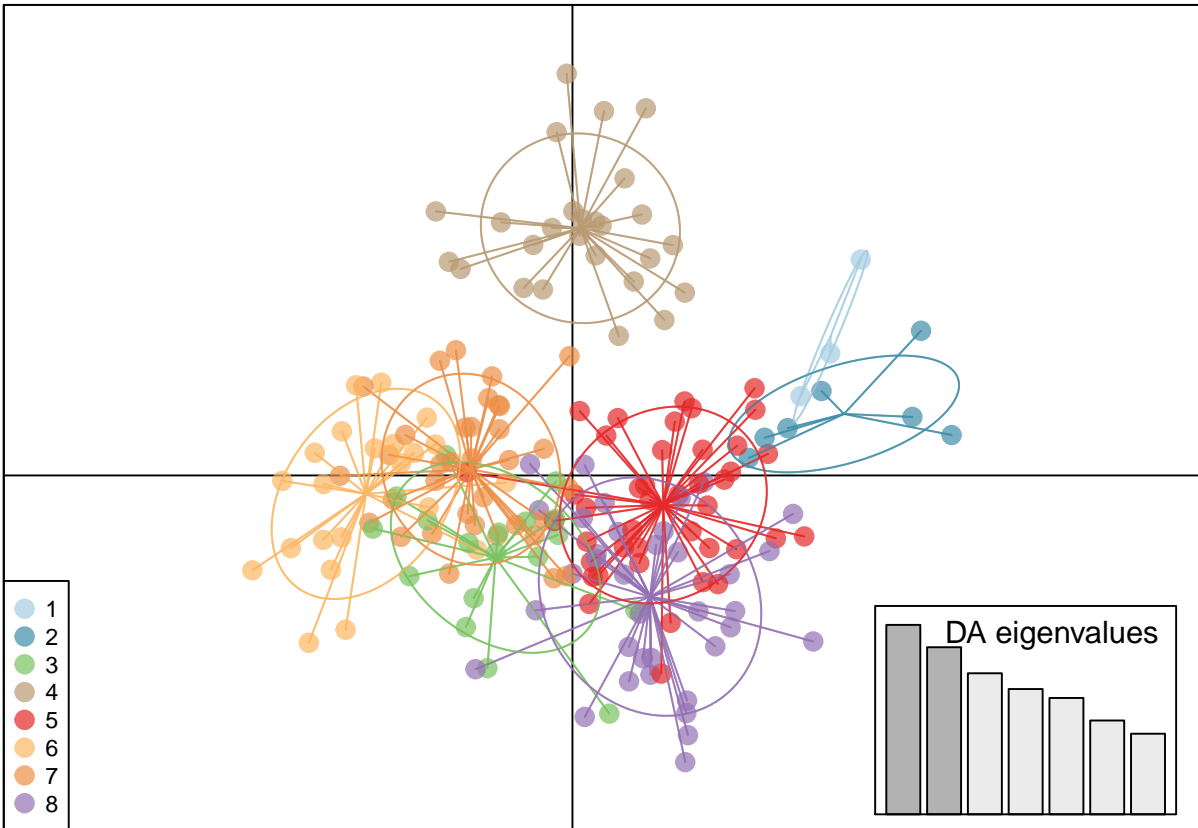

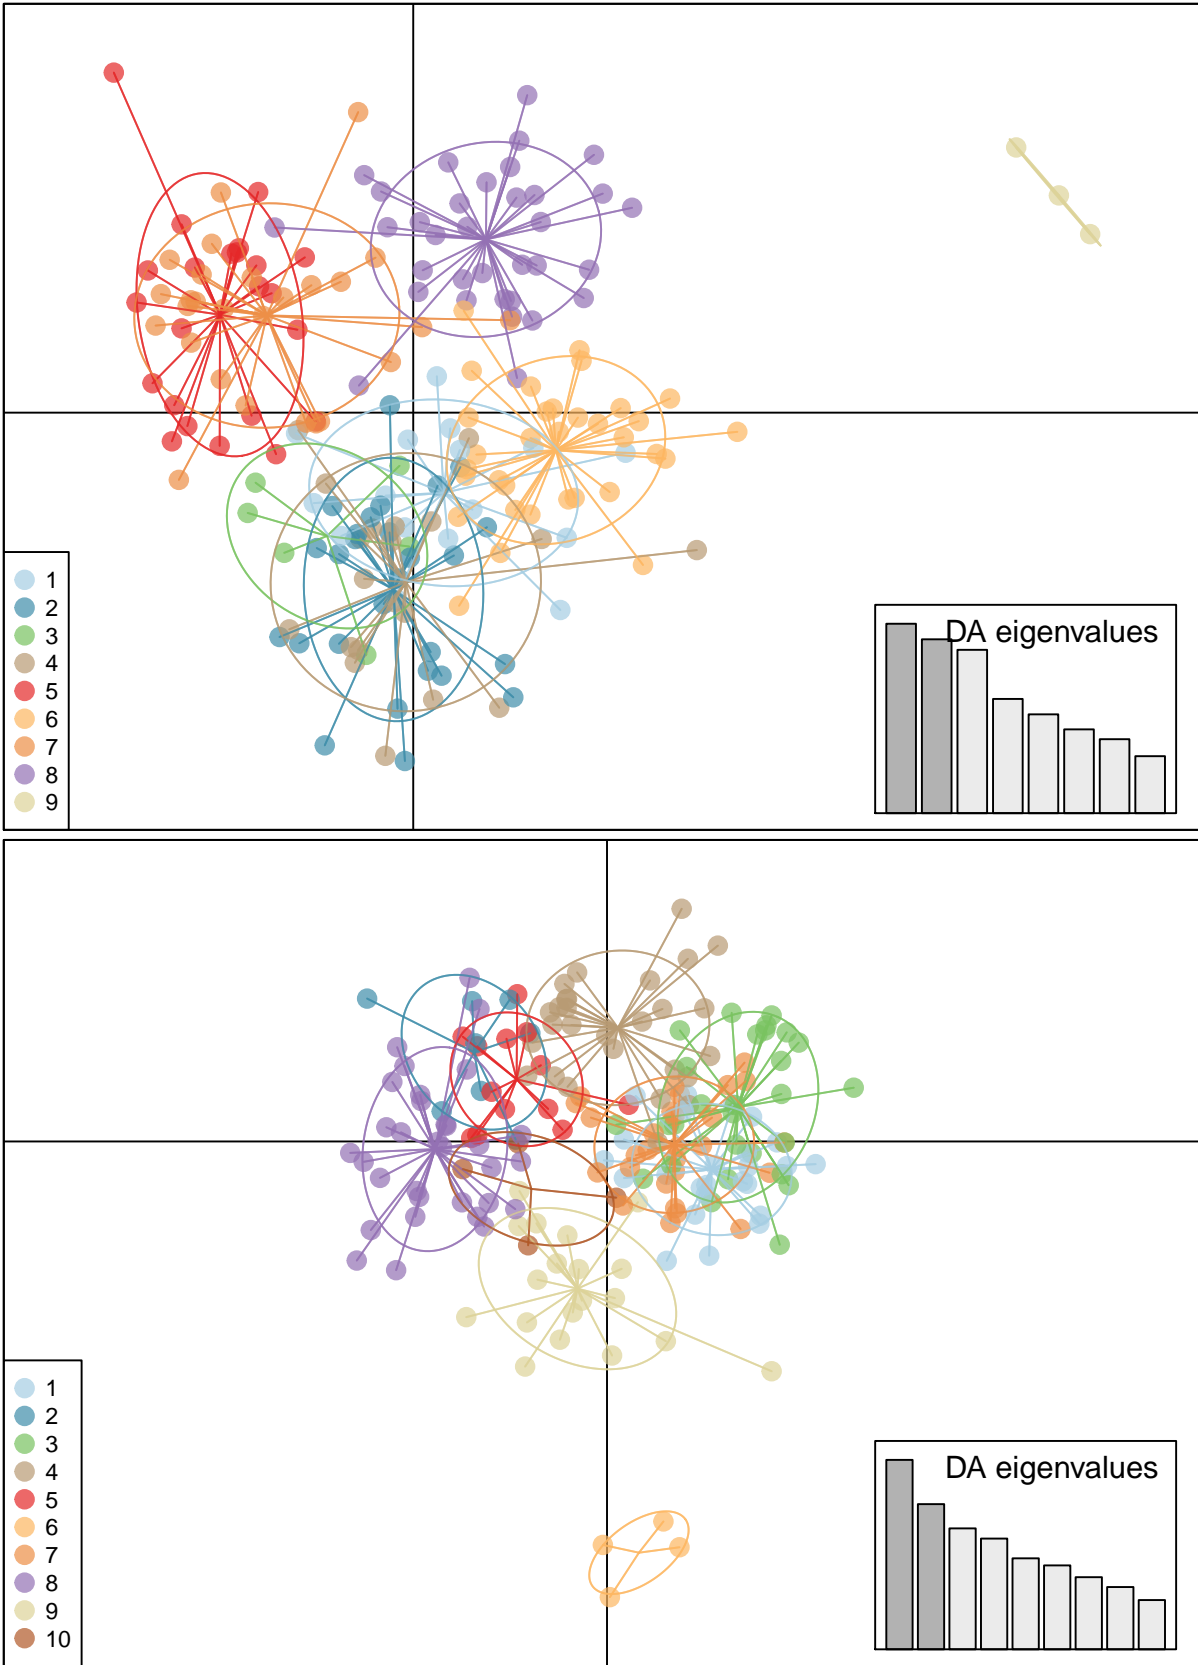

**12.9.5 DAPC scatterplot - FLO**

This code will *colour* individuals according to *sampling location* and **group** individuals according to DAPC **posterior membership**.

```

for (K in 3:10) {
  dapc <- get(dapc.all.object.names[K - 1])
  x <- dapc$ind.coord[,1]
  y <- dapc$ind.coord[,2]
  group <- paste("Group", as.numeric(dapc$assign))
  pop <- BS.dartcap.IWP2.gl$pop
  df <- data.frame(x, y, group, pop)
  colnames(df) <- c("x", "y", "group", "pop")
  gg <- merge(df, aggregate(cbind(mean.x = x, mean.y = y) ~ group, df, mean),
              by = "group")

  plot <- ggplot2::ggplot(gg, ggplot2::aes(x,y,color = pop)) +
    ggplot2::geom_point(size = 5) +
    ggplot2::geom_point(ggplot2::aes(x = mean.x,y = mean.y),size = 5,
                        shape = 17, color = "black") +
    ggplot2::geom_segment(ggplot2::aes(x = mean.x, y = mean.y,
                                       xend = x, yend = y)) +
    ggplot2::scale_colour_manual(values = colours.10) +
    ggplot2::scale_fill_manual(values = colours.10) +
    ggplot2::geom_hline(yintercept = 0) +
    ggplot2::geom_vline(xintercept = 0) +
    ggplot2::labs(subtitle = "",
                  y = "PC2",
                  x = "PC1",
                  title = paste0("K=",K," & PC=",PC, sep = ""),
                  caption = "") +
    ggplot2::theme_minimal() +
    ggplot2::theme(
      axis.text = ggplot2::element_text(size = 5),
      axis.title.x = ggplot2::element_text(size = 10),
      axis.title.y = ggplot2::element_text(size = 10),
      legend.text = ggplot2::element_text(size = 7))
  print(plot)
  ggplot2::ggsave(plot,
                   filename = paste0("DARtcap_IWP2_DAPC_scatterplot2_K", K, ".png"),
                   width = 30, height = 15,units = "cm")
}

```

K=3 & PC=40

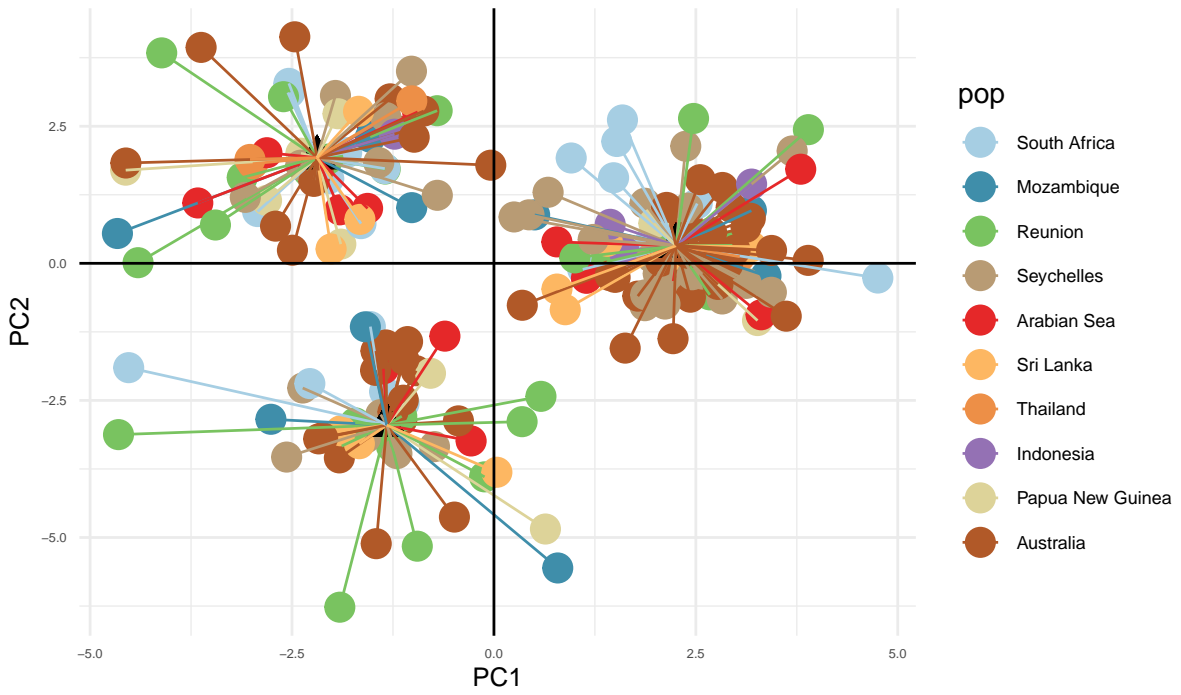

K=4 & PC=40

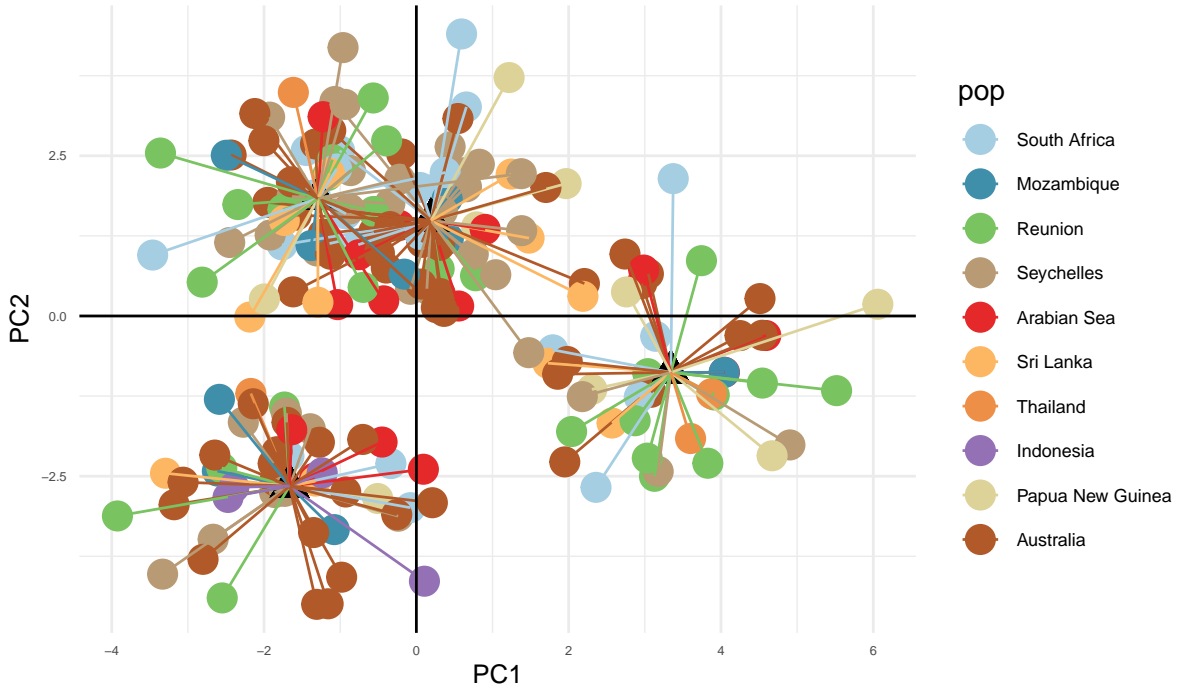

K=5 & PC=40

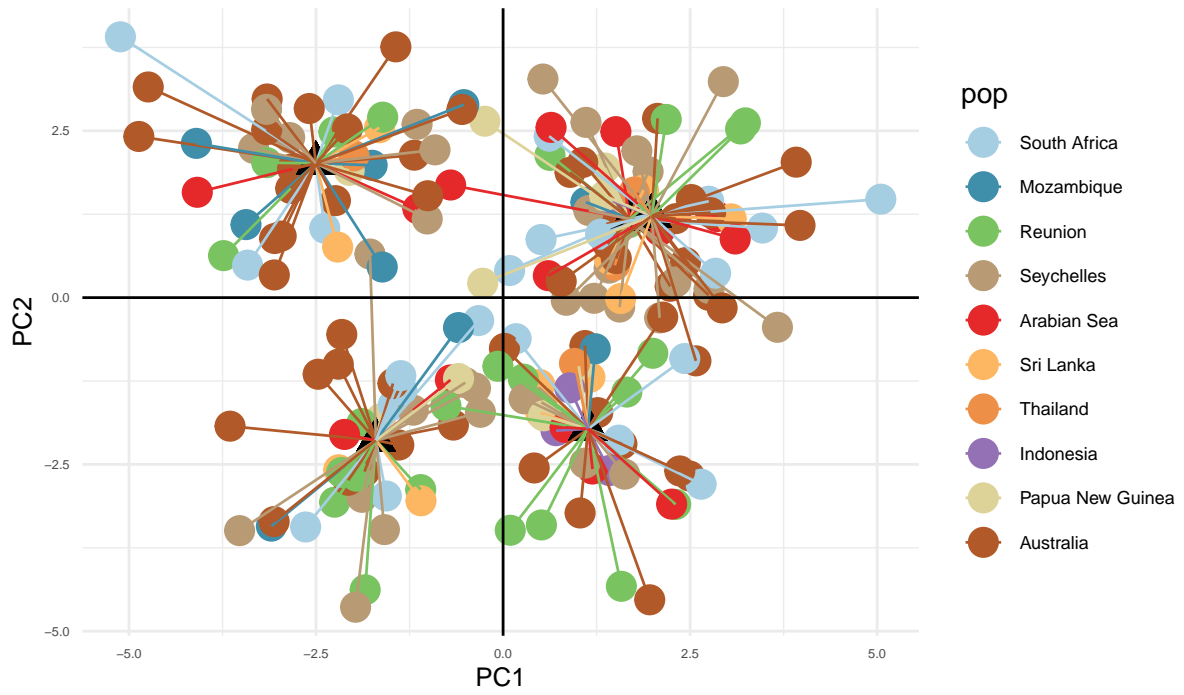

K=6 & PC=40

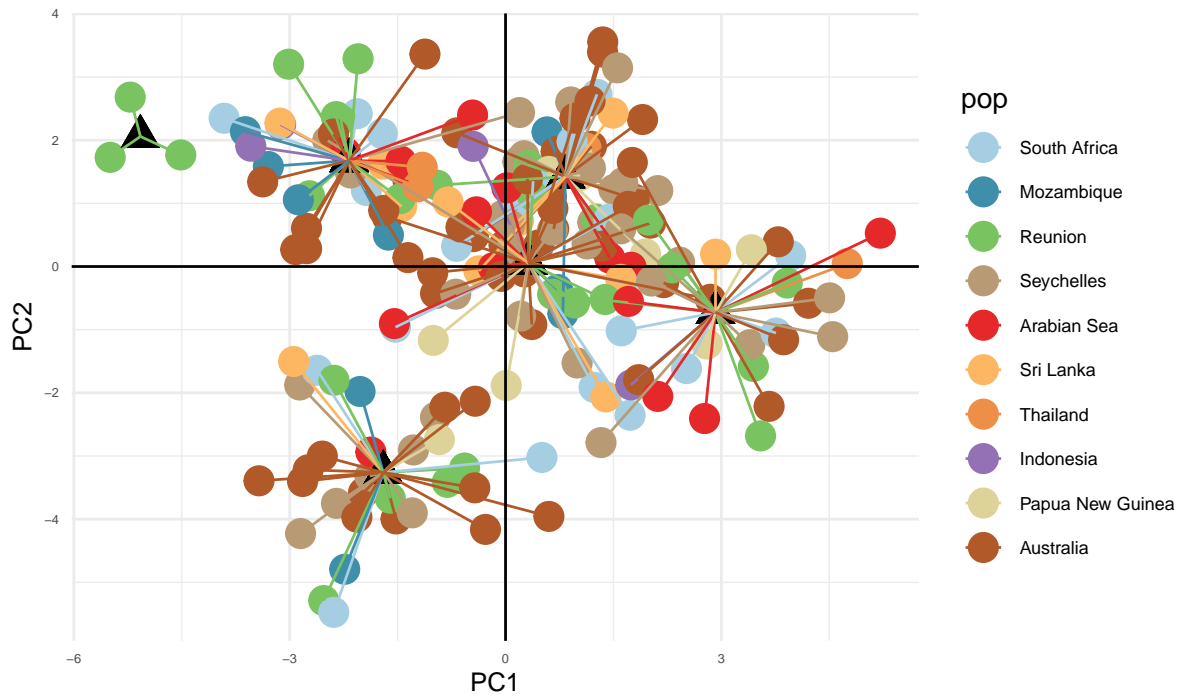

K=7 & PC=40

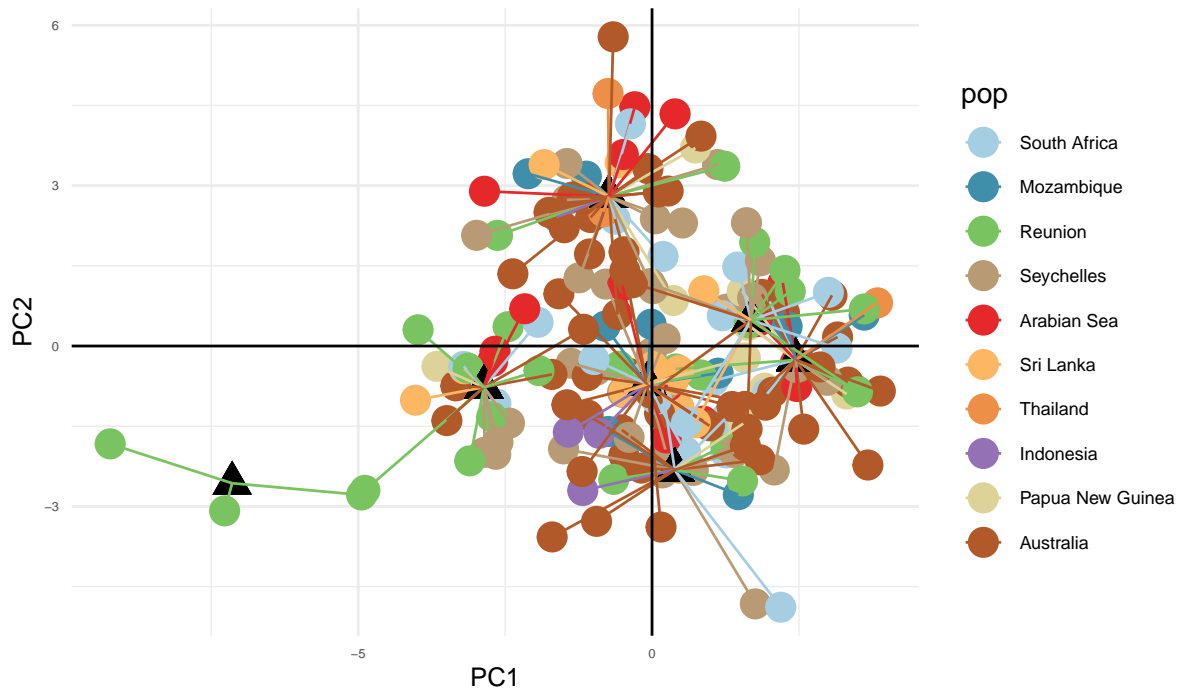

K=8 & PC=40

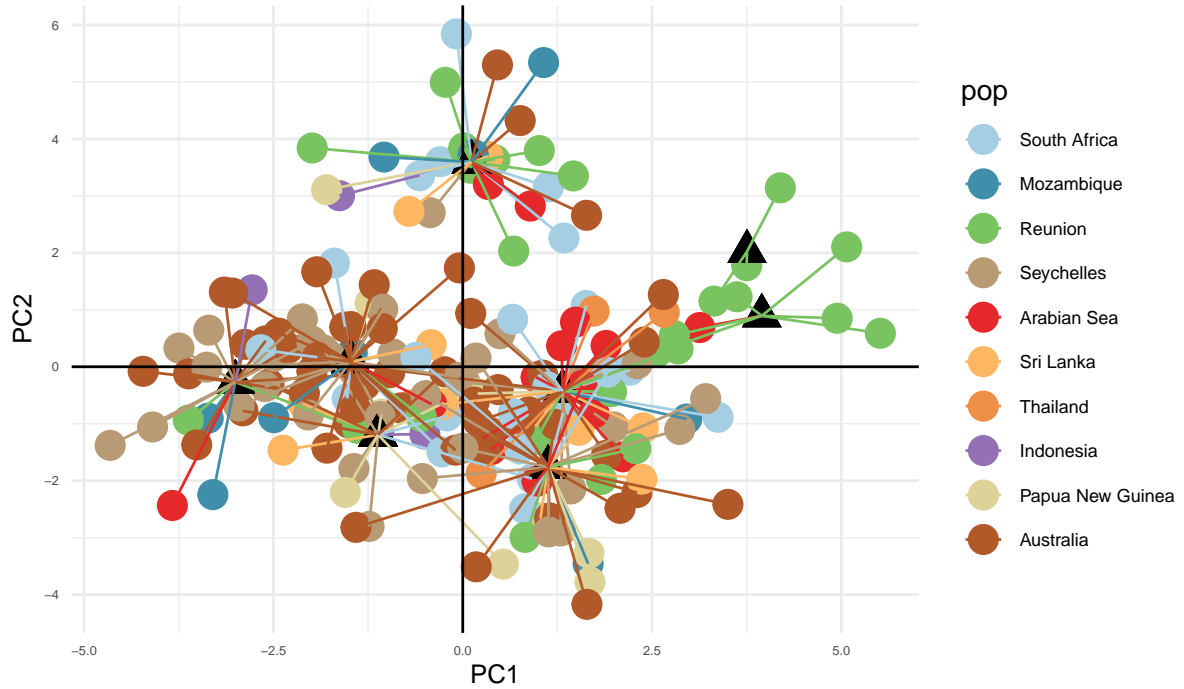



K=9 & PC=40

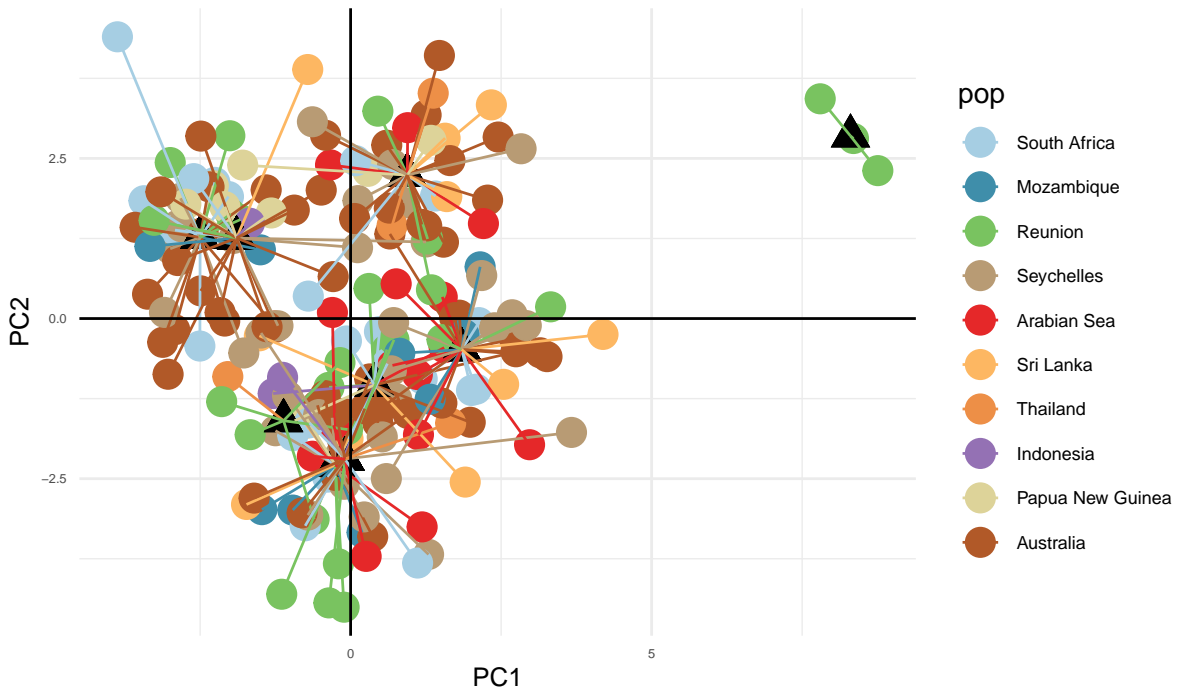

K=10 & PC=40

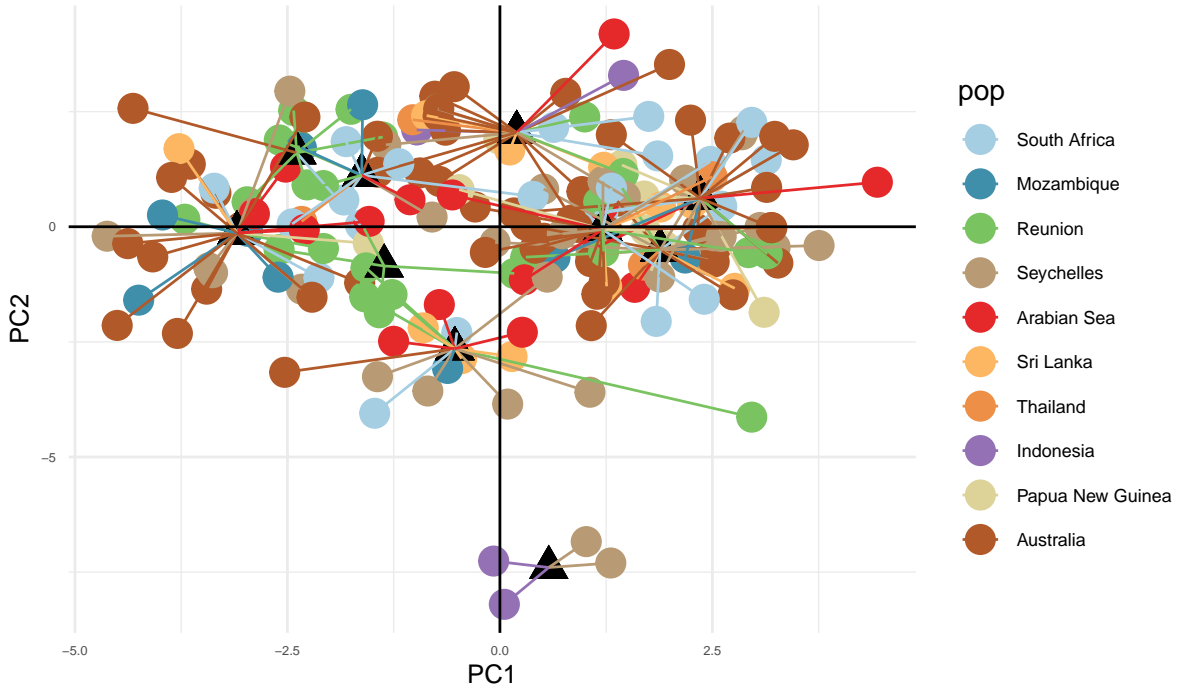

## 13 Mitogenome analyses

### 13.1 Sequencing primers

Primers were designed to amplify the mitochondrial genome of *C. leucas*. The mitochondrial genomes were amplified with two primer pairs.

Table 51: Primer sequences used for amplifying the two halves of the mitochondrial genome

| Mitogenome fragment | Primer name     | Primer sequence                     | Amplicon length (bp) | Ref                         |
|---------------------|-----------------|-------------------------------------|----------------------|-----------------------------|
| A                   | BSh(1975L_for)  | 5'-AACACAAACTCCGCCTGTTACCAAAAACATC  | 9039                 | Devloo-Delva et al. in prep |
| A                   | BSh(10999H_rev) | 5'-CAACCGGCAATTGGAGCTTCAACGTGGG     | 9039                 | Devloo-Delva et al. in prep |
| B                   | BSh(9198L_for)  | 5'-GAGCCCATCATAGCTTAATAGAAGGTAAC    | 9710                 | Devloo-Delva et al. in prep |
| B                   | 16s(747-H_rev)  | 5'-GGTGTCTAAAGCTCCATAGGGTCTTCTCGTCT | 9710                 | Devloo-Delva et al. in prep |

### 13.2 Preparing the mitogenome data files

#### 13.2.1 MultiDNA format

```
f.in <- "BS_mitogenome_361_no_ambiguous.fasta"
metafile <- "1.BullShark_AllSamples_metadata.csv"
BS.ml <- apex::read.multiFASTA(f.in)
(apex::setLocusNames(BS.ml) <- "Mitogenome")
```

#### 13.2.2 Genind format

```
BS.gi <- apex::multidna2genind(BS.ml, mlst = TRUE)
```

#### 13.2.3 Add metadata

```
meta <- read.csv(metafile)
meta <- meta[meta$mtDNA_ID %in% indNames(BS.gi),]
meta <- meta[order(match(meta$mtDNA_ID, indNames(BS.gi))),]

unique(meta$Location)

pop.levels0 <- c("Gulf of California", "Costa Rica", "Sierra Leone", "South Africa",
               "Reunion", "Seychelles", "Abu Dhabi", "Dubai", "Sri Lanka", "Thailand",
               "South-Indonesia", "Jakarta", "Omati River", "Kikori Delta",
               "Turama River", "Sepik River", "Fitzroy River", "Victoria River",
               "Daly River", "Adelaide River",
               "South Alligator River", "East Alligator River", "Blue mud Bay",
               "Roper River",
               "Town's River", "Cape York, QLD", "Trinity inlet", "Clarence River",
               "Sydney Harbour",
               "Okinawa ", "Iriomote Island", "Fiji")
meta$Location <- factor(x = meta$Location, levels = pop.levels0)

pop.levels1 <- c("Gulf of California", "Costa Rica", "Sierra Leone", "South Africa",
               "Reunion", "Seychelles", "Arabian Sea", "Sri Lanka", "Thailand",
               "Indonesia", "Papua New Guinea", "Australia", "Japan", "Fiji")
meta$Site <- factor(x = meta$Site, levels = pop.levels1)

pop.levels2 <- c("E-PAC", "E-ATL", "W-IO", "N-IO", "E-IO", "W-PAC", "Japan", "Fiji")
meta$Region <- factor(x = meta$Region, levels = pop.levels2)

BS.gi$other$ind.meta <- meta
my_strata <- data.frame(Location = meta$Location,
                       Site = meta$Site ,
```

```

        regions = meta$Region)
strata(BS.gi) <- my_strata
BS.gi$pop <- as.factor(meta$Site)

BS.gi <- BS.gi[order(BS.gi$other$ind.meta$Region, BS.gi$other$ind.meta$Site,
                    BS.gi$other$ind.meta$Location, indNames(BS.gi)),]

## [1] "Kikori Delta"           "Okinawa "           "Iriomote Island"
## [4] "South Africa"           "Clarence River"     "Sydney Harbour"
## [7] "Adelaide River"        "Daly River"         "Victoria River"
## [10] "Turama River"          "Omati River"        "Sepik River"
## [13] "Townsv River"         "East Alligator River" "South Alligator River"
## [16] "Cape York, QLD"       "Blue mud Bay"       "Fitzroy River"
## [19] "Roper River"          "Abu Dhabi"          "Thailand"
## [22] "Dubai"                 "South-Indonesia"    "Sri Lanka"
## [25] "Jakarta"               "Fiji"                "Trinity inlet"
## [28] "Reunion"               "Seychelles"         "Sierra Leone"
## [31] "Costa Rica"            "Gulf of California"

```

### 13.2.4 Gtypes format

```

Location <- BS.gi$other$ind.meta$Location[order(match(indNames(BS.gi),
                                                    BS.ml@labels))]
Site <- BS.gi$other$ind.meta$Site[order(match(indNames(BS.gi),
                                                BS.ml@labels))]
Region <- BS.gi$other$ind.meta$Region[order(match(indNames(BS.gi),
                                                    BS.ml@labels))]

strata.schemes <- data.frame(Region, Site, Location)
row.names(strata.schemes) <- BS.ml@labels

BS.gt <- strataG::sequence2gtypes(BS.ml, strata = Site, seq.names = NULL,
                                  schemes = strata.schemes,
                                  description = NULL, other = NULL)

```

### 13.2.5 Haplotype format

#### 13.2.5.1 Haplotypes package This package includes indels: 26 HTs

```

BS.dna <- haplotypes::read.fas(f.in)
BS.hap <- haplotypes::haplotype(BS.dna, indels = "sic")

Location <- BS.gi$other$ind.meta$Location[order(match(indNames(BS.gi),
                                                    BS.dna@seqnames))]
Site <- BS.gi$other$ind.meta$Site[order(match(indNames(BS.gi),
                                                BS.dna@seqnames))]
Region <- BS.gi$other$ind.meta$Region[order(match(indNames(BS.gi),
                                                    BS.dna@seqnames))]

BS.hapgroup <- haplotypes::grouping(BS.hap, Site)

```

#### 13.2.5.2 Pegas package This package does not include indels: 165HTs

```

BS.bin <- read.FASTA(f.in, type = "DNA")
HTs <- paste0("HT", sprintf('%0.3d', 1:165))
BS.h <- pegas::haplotype(BS.bin, HTs)

```

### 13.2.6 Save data

```
save(BS.ml,BS.bin, BS.dna, BS.gi, BS.gt, BS.hap, BS.h,
     file = "6.BS.Rdata")
```

### 13.2.7 Load data

```
load("6.BS.Rdata")
adegenet::nInd(BS.gi)
summary(BS.gi$pop)
summary(BS.gi$other$ind.meta$Location)
```

```
## [1] 359
## Gulf of California      Costa Rica      Sierra Leone   South Africa
##           1           15           1           7
##           Reunion      Seychelles      Arabian Sea     Sri Lanka
##           16           18           19           12
##           Thailand      Indonesia      Papua New Guinea  Australia
##           6           6           15           203
##           Japan        Fiji
##           31           9
## Gulf of California      Costa Rica      Sierra Leone
##           1           15           1
##           South Africa      Reunion      Seychelles
##           7           16           18
##           Arabian Sea      Sri Lanka      Thailand
##           19           12           6
##           Indonesia      Papua New Guinea  Fitzroy River
##           6           15           5
##           Victoria River    Daly River      Adelaide River
##           21           25           18
## South Alligator River  East Alligator River  Blue mud Bay
##           38           17           13
##           Roper River      Towns River      Wenlock River
##           4           5           19
##           Trinity inlet    Clarence River    Sydney Harbour
##           4           21           13
##           Okinawa          Urauchi River    Fiji
##           10           21           9
```

```
strata <- as.character(BS.gt@schemes$Site)
names(strata) <- as.character(BS.gt@schemes$id)
strataG::setStrata(BS.gt) <- strata
BS.gt.AUS <- BS.gt[,,"Australia", drop = TRUE]

schemes.AUS <- BS.gt.AUS@schemes[BS.gt.AUS@schemes$Site == "Australia",]
strata <- as.character(schemes.AUS$Location)
names(strata) <- as.character(schemes.AUS$id)
strataG::setStrata(BS.gt.AUS) <- strata
BS.gt.AUS@schemes <- schemes.AUS

ind.names <- names(BS.dna) %in% BS.gt.AUS@data$id
BS.dna.AUS <- as.dna(BS.dna[ind.names, , drop = TRUE])
BS.bin.AUS <- subset(BS.bin, names(BS.bin) %in% BS.gt.AUS@data$id)
BS.gi.aus <- BS.gi[adegenet::indNames(BS.gi) %in% BS.gt.AUS@data$id]
BS.hap.aus <- haplotypes::haplotype(BS.dna.AUS, indels = "sic")
BS.h.aus <- strataG::labelHaplotypes(BS.bin.AUS, prefix = "HT",
```

```
use.indels = TRUE)
```

### 13.2.7.1 Subset Australia

---

## 13.3 Genetic diversity

### 13.3.1 Overall diversity

```
seqLL <- strataG::sequenceLikelihoods(BS.bin, model = "N",  
                                       pairwise.deletion = FALSE, n = NULL,  
                                       plot = TRUE, simplify = TRUE)
```

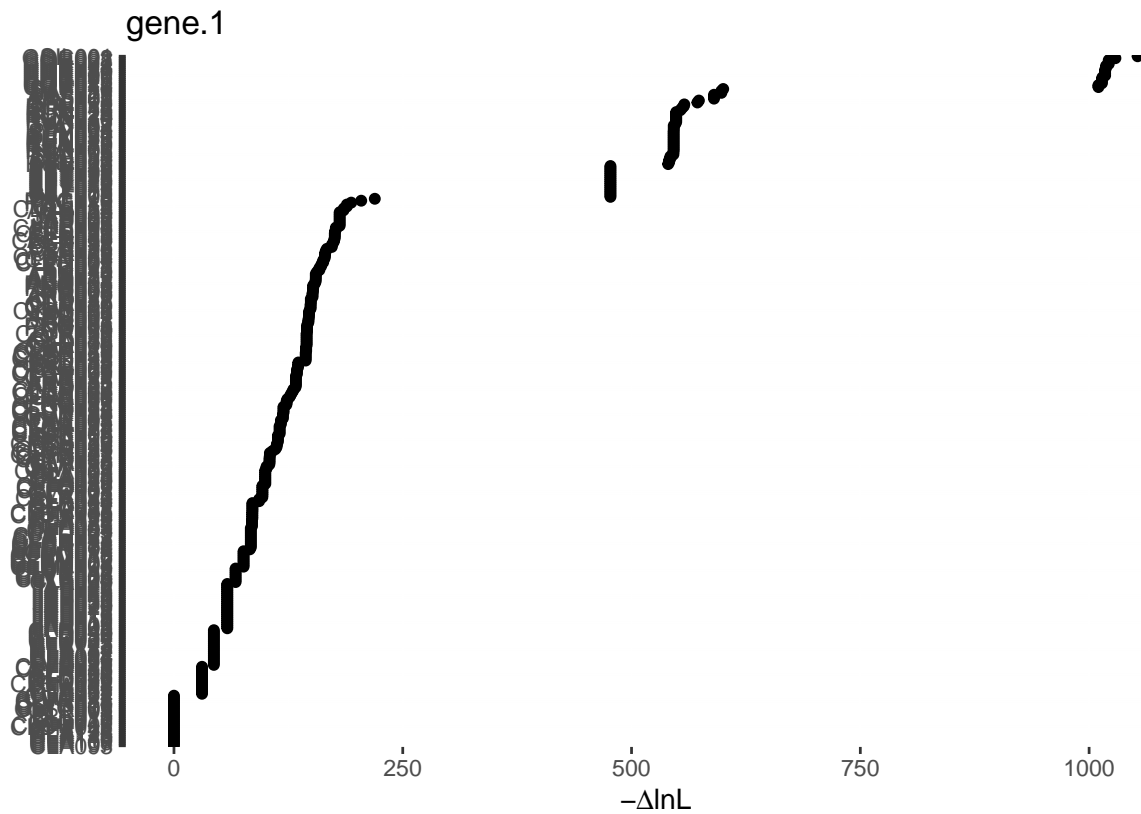

```
{bases <- haplotypes::basecomp(BS.dna)  
print(paste0("Mitogenome base composition:"))  
print(colMeans(bases))}  
  
{pi.gt <- strataG::nucleotideDiversity(BS.gt, bases = c("a", "c", "g", "t"),  
                                       simplify = TRUE)  
plot(names(pi.gt[pi.gt != 0]), pi.gt[pi.gt != 0],  
     xlab = "Base number in mitogenome",  
     ylab = "Nucleotide diversity at each base",  
     main = "Overall nucleotide diversity")}
```

## Overall nucleotide diversity

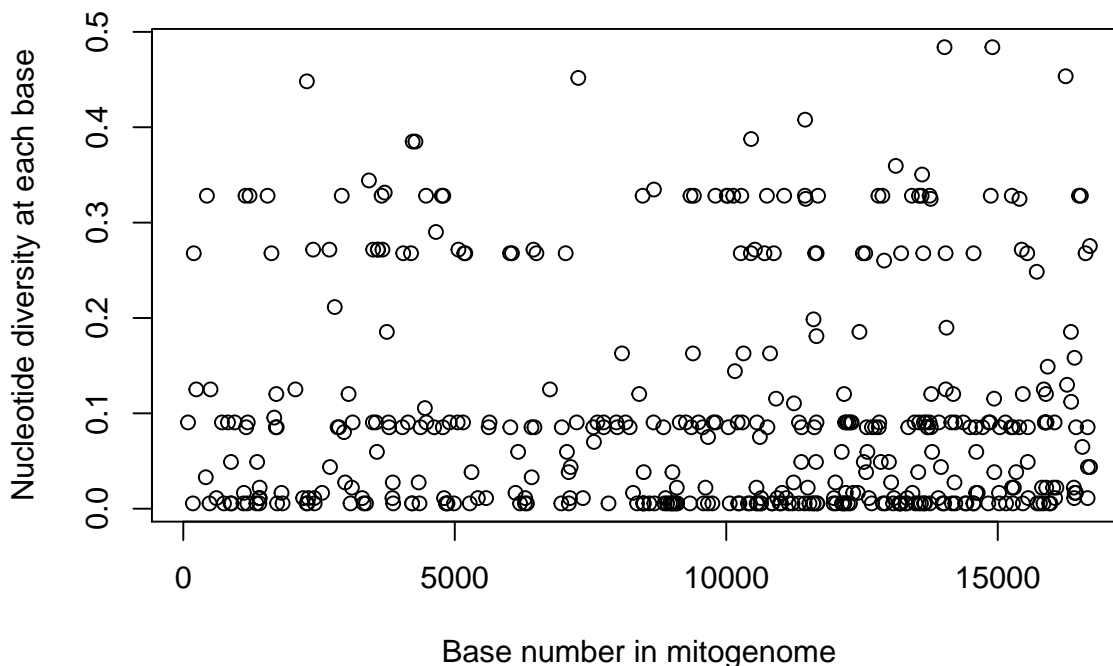

```
print(paste0("Nucleotide diversity according to strataG = ", mean(pi.gt)))
{print(paste0("Nucleotide diversity and variance according to pegas:"))
pegas::nuc.div(BS.bin, variance = TRUE, pairwise.deletion = FALSE)}
{print(paste0("Haplotype diversity and variance according to pegas:"))
pegas::hap.div(BS.bin, variance = TRUE, method = "Nei")}

varsites <- strataG::variableSites(BS.gt, bases = c("a", "c", "g", "t", "-"),
                                   simplify = TRUE)

kableExtra::kbl(t(varsites$site.freqs),
  caption = "Variable sites in mitogenome for all individuals",
  longtable = TRUE, booktabs = TRUE) %>%
  kableExtra::kable_styling(full_width = FALSE, font_size = 5,
    latex_options = c("repeat_header", "hold_position"))
```

```
## [1] "Mitogenome base composition:"
##      A      T      G      C
## 0.3146193 0.2430317 0.1311460 0.3112030
## [1] "Nucleotide diversity according to strataG = 0.00263330094093478"
## [1] "Nucleotide diversity and variance according to pegas:"
## [1] 2.634878e-03 1.604305e-06
## [1] "Haplotype diversity and variance according to pegas:"
## [1] 9.886556e-01 2.119587e-06
```

Table 52: Variable sites in mitogenome for all individuals

|     | a   | c   | g   | t   | -  |
|-----|-----|-----|-----|-----|----|
| 55  | 0   | 0   | 0   | 295 | 64 |
| 87  | 342 | 0   | 17  | 0   | 0  |
| 177 | 0   | 358 | 0   | 1   | 0  |
| 193 | 57  | 0   | 302 | 0   | 0  |
| 239 | 0   | 335 | 0   | 24  | 0  |
| 414 | 353 | 0   | 6   | 0   | 0  |
| 435 | 0   | 285 | 0   | 74  | 0  |
| 483 | 1   | 0   | 358 | 0   | 0  |
| 501 | 0   | 335 | 0   | 24  | 0  |

Table 52: Variable sites in mitogenome for all individuals (continued)

|      | a   | c   | g   | t   | -   |
|------|-----|-----|-----|-----|-----|
| 610  | 0   | 357 | 0   | 2   | 0   |
| 712  | 0   | 342 | 0   | 17  | 0   |
| 749  | 358 | 0   | 0   | 1   | 0   |
| 806  | 0   | 0   | 0   | 4   | 355 |
| 823  | 0   | 17  | 0   | 342 | 0   |
| 870  | 1   | 0   | 358 | 0   | 0   |
| 878  | 0   | 350 | 0   | 9   | 0   |
| 889  | 0   | 1   | 0   | 358 | 0   |
| 948  | 0   | 17  | 0   | 342 | 0   |
| 1108 | 1   | 0   | 358 | 0   | 0   |
| 1116 | 356 | 0   | 3   | 0   | 0   |
| 1146 | 0   | 285 | 0   | 74  | 0   |
| 1158 | 0   | 343 | 0   | 16  | 0   |
| 1180 | 0   | 358 | 0   | 1   | 0   |
| 1187 | 0   | 17  | 0   | 342 | 0   |
| 1220 | 74  | 0   | 285 | 0   | 0   |
| 1346 | 0   | 358 | 0   | 1   | 0   |
| 1360 | 0   | 350 | 0   | 9   | 0   |
| 1399 | 2   | 0   | 357 | 0   | 0   |
| 1401 | 0   | 358 | 0   | 1   | 0   |
| 1402 | 0   | 2   | 0   | 357 | 0   |
| 1403 | 357 | 0   | 0   | 2   | 0   |
| 1404 | 357 | 0   | 0   | 2   | 0   |
| 1406 | 0   | 355 | 0   | 4   | 0   |
| 1552 | 0   | 285 | 0   | 74  | 0   |
| 1624 | 0   | 57  | 0   | 302 | 0   |
| 1675 | 18  | 0   | 341 | 0   | 0   |
| 1704 | 0   | 16  | 0   | 343 | 0   |
| 1713 | 0   | 336 | 0   | 23  | 0   |
| 1720 | 0   | 16  | 0   | 343 | 0   |
| 1728 | 0   | 1   | 0   | 358 | 0   |
| 1809 | 0   | 3   | 0   | 356 | 0   |
| 1828 | 1   | 0   | 358 | 0   | 0   |
| 2065 | 0   | 335 | 0   | 24  | 0   |
| 2207 | 0   | 2   | 0   | 357 | 0   |
| 2270 | 0   | 358 | 0   | 1   | 0   |
| 2276 | 0   | 121 | 0   | 238 | 0   |
| 2288 | 0   | 358 | 0   | 1   | 0   |
| 2304 | 0   | 2   | 0   | 357 | 0   |
| 2391 | 0   | 58  | 0   | 301 | 0   |
| 2412 | 0   | 2   | 0   | 357 | 0   |
| 2419 | 0   | 358 | 0   | 1   | 0   |
| 2556 | 0   | 356 | 0   | 3   | 0   |
| 2691 | 0   | 301 | 0   | 58  | 0   |
| 2702 | 0   | 8   | 0   | 351 | 0   |
| 2789 | 0   | 316 | 0   | 43  | 0   |
| 2842 | 0   | 343 | 0   | 16  | 0   |
| 2868 | 0   | 343 | 0   | 16  | 0   |
| 2918 | 0   | 285 | 0   | 74  | 0   |
| 2960 | 0   | 344 | 0   | 15  | 0   |
| 2981 | 0   | 5   | 0   | 354 | 0   |
| 3044 | 0   | 336 | 0   | 23  | 0   |
| 3080 | 0   | 358 | 0   | 1   | 0   |
| 3105 | 4   | 0   | 355 | 0   | 0   |
| 3119 | 17  | 0   | 342 | 0   | 0   |
| 3295 | 2   | 0   | 357 | 0   | 0   |
| 3323 | 0   | 358 | 0   | 1   | 0   |
| 3365 | 0   | 358 | 0   | 1   | 0   |
| 3419 | 0   | 280 | 0   | 79  | 0   |
| 3491 | 17  | 0   | 342 | 0   | 0   |
| 3497 | 0   | 58  | 0   | 301 | 0   |
| 3548 | 0   | 342 | 0   | 17  | 0   |
| 3566 | 0   | 11  | 0   | 348 | 0   |
| 3582 | 0   | 58  | 0   | 301 | 0   |
| 3587 | 0   | 301 | 0   | 58  | 0   |
| 3652 | 0   | 74  | 0   | 285 | 0   |
| 3668 | 0   | 58  | 0   | 301 | 0   |
| 3710 | 0   | 75  | 0   | 284 | 0   |
| 3749 | 0   | 322 | 0   | 37  | 0   |
| 3779 | 0   | 17  | 0   | 342 | 0   |
| 3791 | 0   | 16  | 0   | 343 | 0   |
| 3852 | 357 | 0   | 2   | 0   | 0   |
| 3858 | 5   | 0   | 354 | 0   | 0   |
| 3866 | 1   | 0   | 358 | 0   | 0   |
| 4035 | 0   | 343 | 0   | 16  | 0   |
| 4050 | 0   | 302 | 0   | 57  | 0   |
| 4140 | 0   | 17  | 0   | 342 | 0   |
| 4194 | 0   | 57  | 0   | 302 | 0   |
| 4212 | 0   | 358 | 0   | 1   | 0   |
| 4215 | 0   | 1   | 0   | 358 | 0   |
| 4224 | 0   | 93  | 0   | 266 | 0   |
| 4275 | 0   | 93  | 0   | 266 | 0   |
| 4335 | 0   | 354 | 0   | 5   | 0   |
| 4350 | 0   | 358 | 0   | 1   | 0   |



Table 52: Variable sites in mitogenome for all individuals (continued)

|      | a   | c   | g   | t   | - |
|------|-----|-----|-----|-----|---|
| 4368 | 0   | 343 | 0   | 16  | 0 |
| 4449 | 0   | 339 | 0   | 20  | 0 |
| 4471 | 0   | 285 | 0   | 74  | 0 |
| 4476 | 0   | 17  | 0   | 342 | 0 |
| 4620 | 0   | 343 | 0   | 16  | 0 |
| 4653 | 0   | 296 | 0   | 63  | 0 |
| 4761 | 0   | 285 | 0   | 74  | 0 |
| 4780 | 0   | 16  | 0   | 343 | 0 |
| 4788 | 74  | 0   | 285 | 0   | 0 |
| 4803 | 0   | 357 | 0   | 2   | 0 |
| 4837 | 0   | 1   | 0   | 358 | 0 |
| 4857 | 0   | 358 | 0   | 1   | 0 |
| 4866 | 0   | 1   | 0   | 358 | 0 |
| 4905 | 0   | 342 | 0   | 17  | 0 |
| 4986 | 0   | 358 | 0   | 1   | 0 |
| 5053 | 342 | 0   | 0   | 17  | 0 |
| 5067 | 0   | 58  | 0   | 301 | 0 |
| 5152 | 0   | 17  | 0   | 342 | 0 |
| 5175 | 0   | 57  | 0   | 302 | 0 |
| 5194 | 57  | 0   | 302 | 0   | 0 |
| 5276 | 1   | 0   | 358 | 0   | 0 |
| 5309 | 7   | 0   | 352 | 0   | 0 |
| 5425 | 2   | 0   | 357 | 0   | 0 |
| 5577 | 2   | 0   | 357 | 0   | 0 |
| 5624 | 0   | 16  | 0   | 343 | 0 |
| 5639 | 0   | 17  | 0   | 342 | 0 |
| 6017 | 0   | 57  | 0   | 302 | 0 |
| 6023 | 0   | 343 | 0   | 16  | 0 |
| 6053 | 0   | 302 | 0   | 57  | 0 |
| 6119 | 0   | 356 | 0   | 3   | 0 |
| 6167 | 0   | 11  | 0   | 348 | 0 |
| 6203 | 0   | 358 | 0   | 1   | 0 |
| 6293 | 1   | 0   | 358 | 0   | 0 |
| 6297 | 2   | 0   | 357 | 0   | 0 |
| 6329 | 0   | 1   | 0   | 358 | 0 |
| 6413 | 0   | 16  | 0   | 343 | 0 |
| 6416 | 0   | 353 | 0   | 6   | 0 |
| 6449 | 301 | 0   | 58  | 0   | 0 |
| 6467 | 0   | 16  | 0   | 343 | 0 |
| 6503 | 0   | 57  | 0   | 302 | 0 |
| 6753 | 0   | 335 | 0   | 24  | 0 |
| 6962 | 0   | 358 | 0   | 1   | 0 |
| 6971 | 0   | 343 | 0   | 16  | 0 |
| 7042 | 0   | 302 | 0   | 57  | 0 |
| 7066 | 0   | 348 | 0   | 11  | 0 |
| 7098 | 0   | 7   | 0   | 352 | 0 |
| 7100 | 0   | 358 | 0   | 1   | 0 |
| 7121 | 0   | 357 | 0   | 2   | 0 |
| 7134 | 8   | 0   | 351 | 0   | 0 |
| 7245 | 0   | 17  | 0   | 342 | 0 |
| 7275 | 0   | 236 | 0   | 123 | 0 |
| 7360 | 2   | 0   | 357 | 0   | 0 |
| 7551 | 0   | 343 | 0   | 16  | 0 |
| 7563 | 0   | 346 | 0   | 13  | 0 |
| 7626 | 0   | 342 | 0   | 17  | 0 |
| 7741 | 342 | 0   | 17  | 0   | 0 |
| 7743 | 0   | 343 | 0   | 16  | 0 |
| 7831 | 1   | 0   | 358 | 0   | 0 |
| 7976 | 0   | 17  | 0   | 342 | 0 |
| 7993 | 0   | 343 | 0   | 16  | 0 |
| 8080 | 0   | 327 | 0   | 32  | 0 |
| 8145 | 0   | 17  | 0   | 342 | 0 |
| 8221 | 0   | 343 | 0   | 16  | 0 |
| 8283 | 0   | 3   | 0   | 356 | 0 |
| 8358 | 0   | 1   | 0   | 358 | 0 |
| 8397 | 336 | 0   | 0   | 23  | 0 |
| 8460 | 0   | 285 | 0   | 74  | 0 |
| 8470 | 0   | 358 | 0   | 1   | 0 |
| 8475 | 0   | 358 | 0   | 1   | 0 |
| 8479 | 0   | 352 | 0   | 7   | 0 |
| 8481 | 0   | 358 | 0   | 1   | 0 |
| 8583 | 0   | 1   | 0   | 358 | 0 |
| 8661 | 17  | 0   | 342 | 0   | 0 |
| 8668 | 0   | 76  | 0   | 283 | 0 |
| 8676 | 0   | 1   | 0   | 358 | 0 |
| 8842 | 0   | 343 | 0   | 16  | 0 |
| 8864 | 1   | 0   | 358 | 0   | 0 |
| 8882 | 0   | 357 | 0   | 2   | 0 |
| 8911 | 0   | 1   | 0   | 358 | 0 |
| 8963 | 0   | 1   | 0   | 358 | 0 |
| 8995 | 0   | 358 | 0   | 1   | 0 |
| 9009 | 7   | 0   | 352 | 0   | 0 |
| 9017 | 0   | 1   | 0   | 358 | 0 |
| 9048 | 1   | 0   | 358 | 0   | 0 |

Table 52: Variable sites in mitogenome for all individuals (continued)

|       | a   | c   | g   | t   | - |
|-------|-----|-----|-----|-----|---|
| 9089  | 0   | 355 | 0   | 4   | 0 |
| 9092  | 0   | 1   | 0   | 358 | 0 |
| 9095  | 0   | 358 | 0   | 1   | 0 |
| 9143  | 0   | 342 | 0   | 17  | 0 |
| 9257  | 0   | 17  | 0   | 342 | 0 |
| 9332  | 1   | 0   | 358 | 0   | 0 |
| 9341  | 0   | 285 | 0   | 74  | 0 |
| 9356  | 0   | 343 | 0   | 16  | 0 |
| 9386  | 0   | 327 | 0   | 32  | 0 |
| 9404  | 0   | 285 | 0   | 74  | 0 |
| 9488  | 0   | 17  | 0   | 342 | 0 |
| 9566  | 16  | 0   | 343 | 0   | 0 |
| 9582  | 0   | 1   | 0   | 358 | 0 |
| 9617  | 0   | 4   | 0   | 355 | 0 |
| 9664  | 0   | 358 | 0   | 1   | 0 |
| 9665  | 0   | 345 | 0   | 14  | 0 |
| 9744  | 0   | 358 | 0   | 1   | 0 |
| 9764  | 0   | 342 | 0   | 17  | 0 |
| 9800  | 0   | 74  | 0   | 285 | 0 |
| 9807  | 0   | 342 | 0   | 17  | 0 |
| 10009 | 285 | 0   | 74  | 0   | 0 |
| 10025 | 0   | 74  | 0   | 285 | 0 |
| 10040 | 16  | 0   | 343 | 0   | 0 |
| 10063 | 0   | 1   | 0   | 358 | 0 |
| 10129 | 0   | 285 | 0   | 74  | 0 |
| 10159 | 0   | 28  | 0   | 331 | 0 |
| 10210 | 0   | 17  | 0   | 342 | 0 |
| 10219 | 0   | 358 | 0   | 1   | 0 |
| 10244 | 0   | 358 | 0   | 1   | 0 |
| 10267 | 0   | 302 | 0   | 57  | 0 |
| 10277 | 0   | 74  | 0   | 285 | 0 |
| 10294 | 0   | 17  | 0   | 342 | 0 |
| 10318 | 0   | 327 | 0   | 32  | 0 |
| 10399 | 0   | 358 | 0   | 1   | 0 |
| 10437 | 0   | 358 | 0   | 1   | 0 |
| 10454 | 0   | 57  | 0   | 302 | 0 |
| 10458 | 0   | 94  | 0   | 265 | 0 |
| 10528 | 0   | 301 | 0   | 58  | 0 |
| 10556 | 4   | 0   | 355 | 0   | 0 |
| 10560 | 358 | 0   | 1   | 0   | 0 |
| 10564 | 0   | 342 | 0   | 17  | 0 |
| 10578 | 0   | 1   | 0   | 358 | 0 |
| 10619 | 14  | 0   | 345 | 0   | 0 |
| 10632 | 0   | 1   | 0   | 358 | 0 |
| 10641 | 0   | 1   | 0   | 358 | 0 |
| 10642 | 0   | 357 | 0   | 2   | 0 |
| 10704 | 0   | 57  | 0   | 302 | 0 |
| 10749 | 74  | 0   | 285 | 0   | 0 |
| 10758 | 0   | 16  | 0   | 343 | 0 |
| 10807 | 0   | 327 | 0   | 32  | 0 |
| 10840 | 0   | 358 | 0   | 1   | 0 |
| 10851 | 358 | 0   | 1   | 0   | 0 |
| 10876 | 0   | 57  | 0   | 302 | 0 |
| 10917 | 337 | 0   | 22  | 0   | 0 |
| 10939 | 2   | 0   | 357 | 0   | 0 |
| 10983 | 0   | 1   | 0   | 358 | 0 |
| 11010 | 0   | 358 | 0   | 1   | 0 |
| 11028 | 0   | 3   | 0   | 356 | 0 |
| 11067 | 0   | 285 | 0   | 74  | 0 |
| 11105 | 0   | 2   | 0   | 357 | 0 |
| 11151 | 0   | 0   | 1   | 358 | 0 |
| 11220 | 1   | 358 | 0   | 0   | 0 |
| 11239 | 5   | 0   | 354 | 0   | 0 |
| 11247 | 0   | 21  | 0   | 338 | 0 |
| 11337 | 0   | 358 | 0   | 1   | 0 |
| 11340 | 0   | 342 | 0   | 17  | 0 |
| 11382 | 0   | 350 | 0   | 9   | 0 |
| 11388 | 16  | 0   | 343 | 0   | 0 |
| 11445 | 0   | 358 | 0   | 1   | 0 |
| 11448 | 0   | 74  | 0   | 285 | 0 |
| 11452 | 0   | 102 | 0   | 257 | 0 |
| 11463 | 0   | 73  | 0   | 286 | 0 |
| 11500 | 0   | 355 | 0   | 4   | 0 |
| 11532 | 0   | 358 | 0   | 1   | 0 |
| 11599 | 358 | 0   | 1   | 0   | 0 |
| 11607 | 0   | 40  | 0   | 319 | 0 |
| 11610 | 0   | 358 | 0   | 1   | 0 |
| 11621 | 0   | 343 | 0   | 16  | 0 |
| 11637 | 0   | 57  | 0   | 302 | 0 |
| 11652 | 0   | 350 | 0   | 9   | 0 |
| 11661 | 0   | 323 | 0   | 36  | 0 |
| 11662 | 0   | 342 | 0   | 17  | 0 |
| 11664 | 0   | 302 | 0   | 57  | 0 |
| 11670 | 0   | 358 | 0   | 1   | 0 |

Table 52: Variable sites in mitogenome for all individuals (continued)

|       | a   | c   | g   | t   | - |
|-------|-----|-----|-----|-----|---|
| 11676 | 0   | 358 | 0   | 1   | 0 |
| 11691 | 0   | 74  | 0   | 285 | 0 |
| 11976 | 358 | 0   | 1   | 0   | 0 |
| 11982 | 2   | 0   | 357 | 0   | 0 |
| 12010 | 0   | 354 | 0   | 5   | 0 |
| 12023 | 1   | 0   | 358 | 0   | 0 |
| 12127 | 0   | 348 | 0   | 11  | 0 |
| 12131 | 0   | 358 | 0   | 1   | 0 |
| 12167 | 0   | 358 | 0   | 1   | 0 |
| 12170 | 0   | 336 | 0   | 23  | 0 |
| 12176 | 0   | 358 | 0   | 1   | 0 |
| 12188 | 0   | 342 | 0   | 17  | 0 |
| 12202 | 0   | 3   | 0   | 356 | 0 |
| 12219 | 0   | 342 | 0   | 17  | 0 |
| 12239 | 0   | 1   | 0   | 358 | 0 |
| 12251 | 0   | 342 | 0   | 17  | 0 |
| 12278 | 0   | 358 | 0   | 1   | 0 |
| 12290 | 0   | 17  | 0   | 342 | 0 |
| 12311 | 0   | 17  | 0   | 342 | 0 |
| 12338 | 0   | 356 | 0   | 3   | 0 |
| 12423 | 3   | 0   | 356 | 0   | 0 |
| 12453 | 37  | 0   | 322 | 0   | 0 |
| 12516 | 0   | 302 | 0   | 57  | 0 |
| 12533 | 0   | 350 | 0   | 9   | 0 |
| 12560 | 0   | 302 | 0   | 57  | 0 |
| 12576 | 0   | 352 | 0   | 7   | 0 |
| 12587 | 0   | 16  | 0   | 343 | 0 |
| 12599 | 0   | 348 | 0   | 11  | 0 |
| 12626 | 0   | 357 | 0   | 2   | 0 |
| 12678 | 0   | 1   | 0   | 358 | 0 |
| 12683 | 0   | 343 | 0   | 16  | 0 |
| 12743 | 16  | 0   | 0   | 343 | 0 |
| 12803 | 0   | 74  | 0   | 285 | 0 |
| 12809 | 0   | 343 | 0   | 16  | 0 |
| 12818 | 0   | 342 | 0   | 17  | 0 |
| 12846 | 9   | 0   | 350 | 0   | 0 |
| 12875 | 74  | 0   | 285 | 0   | 0 |
| 12885 | 1   | 0   | 358 | 0   | 0 |
| 12908 | 0   | 304 | 0   | 55  | 0 |
| 12932 | 0   | 358 | 0   | 1   | 0 |
| 12996 | 9   | 0   | 350 | 0   | 0 |
| 13037 | 5   | 0   | 0   | 354 | 0 |
| 13073 | 0   | 1   | 0   | 358 | 0 |
| 13088 | 0   | 2   | 0   | 357 | 0 |
| 13122 | 84  | 0   | 275 | 0   | 0 |
| 13183 | 0   | 1   | 0   | 358 | 0 |
| 13190 | 358 | 0   | 0   | 1   | 0 |
| 13200 | 1   | 0   | 358 | 0   | 0 |
| 13217 | 0   | 1   | 0   | 358 | 0 |
| 13221 | 57  | 0   | 302 | 0   | 0 |
| 13301 | 0   | 358 | 0   | 1   | 0 |
| 13328 | 0   | 358 | 0   | 1   | 0 |
| 13332 | 2   | 0   | 357 | 0   | 0 |
| 13352 | 0   | 343 | 0   | 16  | 0 |
| 13419 | 285 | 0   | 74  | 0   | 0 |
| 13429 | 0   | 356 | 0   | 3   | 0 |
| 13469 | 0   | 342 | 0   | 17  | 0 |
| 13484 | 0   | 1   | 0   | 358 | 0 |
| 13536 | 0   | 7   | 0   | 352 | 0 |
| 13544 | 0   | 1   | 0   | 358 | 0 |
| 13550 | 285 | 0   | 74  | 0   | 0 |
| 13554 | 0   | 17  | 0   | 342 | 0 |
| 13586 | 0   | 1   | 0   | 358 | 0 |
| 13598 | 0   | 285 | 0   | 74  | 0 |
| 13607 | 0   | 81  | 0   | 278 | 0 |
| 13628 | 0   | 57  | 0   | 302 | 0 |
| 13640 | 0   | 17  | 0   | 342 | 0 |
| 13643 | 0   | 358 | 0   | 1   | 0 |
| 13659 | 0   | 358 | 0   | 1   | 0 |
| 13679 | 0   | 342 | 0   | 17  | 0 |
| 13709 | 0   | 16  | 0   | 343 | 0 |
| 13710 | 0   | 343 | 0   | 16  | 0 |
| 13745 | 0   | 17  | 0   | 342 | 0 |
| 13746 | 0   | 74  | 0   | 285 | 0 |
| 13750 | 0   | 1   | 0   | 358 | 0 |
| 13765 | 0   | 286 | 0   | 73  | 0 |
| 13768 | 0   | 16  | 0   | 343 | 0 |
| 13776 | 0   | 336 | 0   | 23  | 0 |
| 13792 | 0   | 348 | 0   | 11  | 0 |
| 13905 | 0   | 357 | 0   | 2   | 0 |
| 13916 | 0   | 342 | 0   | 17  | 0 |
| 13954 | 0   | 8   | 0   | 351 | 0 |
| 13983 | 0   | 1   | 0   | 358 | 0 |
| 14014 | 0   | 358 | 0   | 1   | 0 |

Table 52: Variable sites in mitogenome for all individuals (continued)

|       | a   | c   | g   | t   | -   |
|-------|-----|-----|-----|-----|-----|
| 14020 | 0   | 146 | 0   | 213 | 0   |
| 14040 | 0   | 302 | 0   | 57  | 0   |
| 14043 | 0   | 24  | 0   | 335 | 0   |
| 14056 | 0   | 321 | 0   | 38  | 0   |
| 14145 | 17  | 0   | 342 | 0   | 0   |
| 14158 | 358 | 0   | 1   | 0   | 0   |
| 14180 | 23  | 0   | 336 | 0   | 0   |
| 14203 | 5   | 0   | 354 | 0   | 0   |
| 14215 | 17  | 0   | 342 | 0   | 0   |
| 14219 | 1   | 0   | 358 | 0   | 0   |
| 14367 | 0   | 342 | 0   | 17  | 0   |
| 14400 | 0   | 358 | 0   | 1   | 0   |
| 14422 | 1   | 0   | 358 | 0   | 0   |
| 14490 | 0   | 16  | 0   | 343 | 0   |
| 14551 | 1   | 0   | 358 | 0   | 0   |
| 14554 | 57  | 0   | 302 | 0   | 0   |
| 14557 | 0   | 358 | 0   | 1   | 0   |
| 14592 | 0   | 16  | 0   | 343 | 0   |
| 14601 | 0   | 356 | 0   | 3   | 0   |
| 14605 | 11  | 0   | 348 | 0   | 0   |
| 14631 | 0   | 356 | 0   | 3   | 0   |
| 14718 | 0   | 343 | 0   | 16  | 0   |
| 14826 | 1   | 0   | 358 | 0   | 0   |
| 14832 | 342 | 0   | 17  | 0   | 0   |
| 14859 | 0   | 342 | 0   | 17  | 0   |
| 14871 | 0   | 74  | 0   | 285 | 0   |
| 14901 | 0   | 213 | 0   | 146 | 0   |
| 14933 | 0   | 337 | 0   | 22  | 0   |
| 14937 | 0   | 352 | 0   | 7   | 0   |
| 15024 | 0   | 356 | 0   | 3   | 0   |
| 15027 | 0   | 358 | 0   | 1   | 0   |
| 15039 | 0   | 343 | 0   | 16  | 0   |
| 15141 | 0   | 17  | 0   | 342 | 0   |
| 15153 | 0   | 1   | 0   | 358 | 0   |
| 15246 | 0   | 343 | 0   | 16  | 0   |
| 15258 | 0   | 285 | 0   | 74  | 0   |
| 15262 | 0   | 4   | 0   | 355 | 0   |
| 15281 | 0   | 358 | 0   | 1   | 0   |
| 15285 | 0   | 343 | 0   | 16  | 0   |
| 15297 | 0   | 4   | 0   | 355 | 0   |
| 15340 | 7   | 0   | 352 | 0   | 0   |
| 15396 | 0   | 343 | 0   | 16  | 0   |
| 15401 | 0   | 286 | 0   | 73  | 0   |
| 15441 | 0   | 58  | 0   | 301 | 0   |
| 15461 | 0   | 336 | 0   | 23  | 0   |
| 15462 | 0   | 358 | 0   | 1   | 0   |
| 15543 | 0   | 57  | 0   | 302 | 0   |
| 15552 | 0   | 350 | 0   | 9   | 0   |
| 15555 | 16  | 0   | 343 | 0   | 0   |
| 15561 | 0   | 2   | 0   | 357 | 0   |
| 15671 | 40  | 0   | 0   | 0   | 319 |
| 15718 | 0   | 52  | 0   | 307 | 0   |
| 15728 | 0   | 1   | 0   | 358 | 0   |
| 15777 | 358 | 0   | 1   | 0   | 0   |
| 15805 | 358 | 0   | 0   | 0   | 1   |
| 15816 | 4   | 0   | 355 | 0   | 0   |
| 15843 | 0   | 358 | 0   | 1   | 0   |
| 15848 | 0   | 24  | 0   | 335 | 0   |
| 15867 | 0   | 342 | 0   | 17  | 0   |
| 15869 | 17  | 0   | 342 | 0   | 0   |
| 15888 | 0   | 23  | 0   | 336 | 0   |
| 15891 | 342 | 0   | 17  | 0   | 0   |
| 15893 | 0   | 4   | 0   | 355 | 0   |
| 15899 | 342 | 0   | 17  | 0   | 0   |
| 15920 | 29  | 0   | 330 | 0   | 0   |
| 15946 | 0   | 358 | 0   | 1   | 0   |
| 15971 | 0   | 1   | 0   | 358 | 0   |
| 16020 | 0   | 0   | 4   | 355 | 0   |
| 16047 | 17  | 0   | 0   | 342 | 0   |
| 16057 | 0   | 357 | 0   | 2   | 0   |
| 16080 | 355 | 0   | 4   | 0   | 0   |
| 16084 | 0   | 0   | 0   | 355 | 4   |
| 16251 | 235 | 0   | 124 | 0   | 0   |
| 16277 | 0   | 25  | 0   | 334 | 0   |
| 16348 | 322 | 0   | 37  | 0   | 0   |
| 16352 | 338 | 13  | 0   | 8   | 0   |
| 16402 | 0   | 4   | 0   | 355 | 0   |
| 16408 | 2   | 0   | 357 | 0   | 0   |
| 16414 | 328 | 0   | 31  | 0   | 0   |
| 16417 | 0   | 3   | 0   | 356 | 0   |
| 16442 | 356 | 0   | 3   | 0   | 0   |
| 16443 | 0   | 343 | 0   | 16  | 0   |
| 16496 | 0   | 285 | 0   | 74  | 0   |
| 16531 | 74  | 285 | 0   | 0   | 0   |

Table 52: Variable sites in mitogenome for all individuals (continued)

|       | a   | c   | g   | t   | -   |
|-------|-----|-----|-----|-----|-----|
| 16559 | 0   | 347 | 0   | 12  | 0   |
| 16562 | 137 | 0   | 0   | 0   | 222 |
| 16618 | 57  | 0   | 302 | 0   | 0   |
| 16655 | 0   | 2   | 0   | 357 | 0   |
| 16656 | 0   | 16  | 0   | 343 | 0   |
| 16660 | 0   | 351 | 0   | 8   | 0   |
| 16686 | 0   | 0   | 0   | 56  | 303 |
| 16687 | 56  | 0   | 0   | 0   | 303 |
| 16696 | 300 | 0   | 59  | 0   | 0   |
| 16700 | 351 | 0   | 8   | 0   | 0   |
| 16705 | 0   | 0   | 0   | 358 | 1   |
| 16706 | 0   | 0   | 358 | 0   | 1   |

### 13.3.2 Diversity per location

```

strata <- as.character(BS.gt@schemes$Location)
names(strata) <- as.character(BS.gt@schemes$id)
strataG::setStrata(BS.gt) <- strata

divers.location <- data.frame(Location = character(), pi.strataG = numeric(),
                             pi.pegas = numeric(), pi.pegas.var = numeric(),
                             HT.richness.strataG = numeric(), h.pegas = numeric(),
                             h.pegas.var = numeric())
for (Location in levels(BS.gt@schemes$Location)) {
  print(Location)
  BS.gt.sub <- BS.gt[,Location, drop = TRUE]
  BS.bin.sub <- subset(BS.bin, names(BS.bin) %in% BS.gt.sub@data$id)
  BS.h.sub <- strataG::labelHaplotypes(BS.bin.sub, prefix = "HT",
                                       use.indels = TRUE)
  BS.dna.sub <- as.dna(BS.dna[names(BS.dna) %in% BS.gt.sub@data$id, ,
                           drop = TRUE])
  bases <- haplotypes::basecomp(BS.dna.sub)
  print(paste0("Mitogenome base composition:"))
  print(colMeans(bases))

  pi.gt <-
    strataG::nucleotideDiversity(BS.gt.sub, bases = c("a", "c", "g", "t"),
                                simplify = TRUE)
  pi.peg <- pegas::nuc.div(BS.bin.sub, variance = TRUE,
                          pairwise.deletion = FALSE)
  h.peg <- pegas::hap.div(BS.bin.sub, variance = TRUE, method = "Nei")
  res <- data.frame(Location, mean(pi.gt), pi.peg[1], pi.peg[2],
                   length(unique(BS.h.sub$haps)),
                   h.peg[1], h.peg[2])
  colnames(res) <- c("Location", "pi.strataG", "pi.pegas", "pi.pegas.var",
                   "HT.richness.strataG", "h.pegas", "h.pegas.var")
  divers.location <- rbind(divers.location, res)
}

knitr::kable(
  divers.location,
  caption = "Nucleotide and haplotype diversity per Location",
  # format = "html",
  digits = 6
) %>%
kableExtra::kable_styling(full_width = FALSE, font_size = 5,
                          latex_options = c("hold_position"))

```

```

dA.gt <- strataG::nucleotideDivergence(BS.gt,
                                       probs = c(0, 0.025, 0.5, 0.975, 1),
                                       model = "RAW")

knitr::kable(
  dA.gt$within[order(dA.gt$within$mean, decreasing = TRUE), -1],
  # format = "html",
  caption = "Nucleotide divergence within each Location",
  digits = 6
) %>%
kableExtra::kable_styling(full_width = FALSE, font_size = 5,
                           latex_options = c("hold_position"))

kableExtra::kbl(dA.gt$between[order(dA.gt$between$mean, decreasing = TRUE), -1],
  caption = "Nucleotide divergence between each Location",
  longtable = TRUE, booktabs = TRUE) %>%
kableExtra::kable_styling(full_width = FALSE, font_size = 5,
                           latex_options = c("repeat_header", "hold_position"))

hapcount <- pegas::haploFreq(BS.dna@sequence, fac = BS.gt@schemes$Location,
                             split = NULL, what = 1, haplo = NULL)
row.names(hapcount) <- paste0("HT", sprintf('%0.2d', 1:BS.hap@nhap))
shortnames <- c("GOC", "COR", "SIL", "SAF", "RUN", "SEY", "ARS", "SRL", "TAI",
               "IND", "PNG", "FZR", "VIR", "DAR", "ADR", "SAR", "EAR", "BMB",
               "ROR", "TOR", "WER", "TRI", "CLR", "SYH", "URR", "OKI", "FIJ")

kableExtra::kbl(hapcount, col.names = shortnames,
  caption = "Haplotype counts per Location according to pegas",
  longtable = TRUE, booktabs = TRUE) %>%
kableExtra::kable_styling(full_width = FALSE, font_size = 5,
                           latex_options = c("repeat_header", "hold_position")) %>%
kableExtra::landscape()

# group.levels <- levels(BS.gi$other$ind.meta$Location)
group.levels <- c("Gulf of California", "Costa Rica", "Sierra Leone", "South Africa",
  "Reunion", "Seychelles", "Arabian Sea", "Sri Lanka", "Thailand",
  "Indonesia", "Papua New Guinea", "Fitzroy River", "Victoria River",
  "Daly River", "Adelaide River", "South Alligator River",
  "East Alligator River", "Blue mud Bay", "Roper River", "Townsville",
  "Wenlock River", "Trinity inlet", "Clarence River", "Sydney Harbour",
  "Okinawa", "Urauchi River", "Fiji")

group.names <- BS.gi$other$ind.meta$Location

HTs <- paste0("HT", sprintf('%0.3d', 1:BS.hap@nhap))
df <- data.frame(group = NULL, nind = NULL, hap = NULL, nhap = NULL,
  hapfreq = NULL, stringsAsFactors = FALSE)
for (k in 1:length(group.levels)) {
  group.inds <- adegenet::indNames(BS.gi)[group.names == group.levels[k]]
  for (i in 1:BS.hap@nhap) {
    group <- group.levels[k]
    nind <- length(group.inds)
    hap <- HTs[i]
    nhap <- sum(group.inds %in% BS.hap@haplist[[i]])
    hapfreq <- nhap/nind
    df <- plyr::rbind.fill(df, data.frame(group = group, nind = nind, hap = hap,
      nhap = nhap, hapfreq = hapfreq,
      stringsAsFactors = FALSE))
  }
}

```

```

}
}

df$group <- factor(df$group, levels = group.levels)

haplotype.labels <- unique(df$hap)
haplotype.labels2 <- haplotype.labels[seq(1, length(haplotype.labels), by = 5)]

HT.plot <- ggplot2::ggplot(data = df) +
  ggplot2::geom_bar(ggplot2::aes(x = hap, y = nhap, fill = group),
                    stat = "identity", position = "stack") +
  ggplot2::labs(x = "Haplotypes", y = "Number of individuals") +
  ggplot2::scale_fill_manual(values = colours.27) +
  ggplot2::scale_x_discrete(breaks = haplotype.labels2) +
  ggplot2::theme(
    axis.text = ggplot2::element_text(angle = 45, hjust = 1, size = 5),
    axis.title.x = ggplot2::element_text(size = 10),
    axis.title.y = ggplot2::element_text(size = 10),
    legend.text = ggplot2::element_text(size = 7))
print(HT.plot)

```

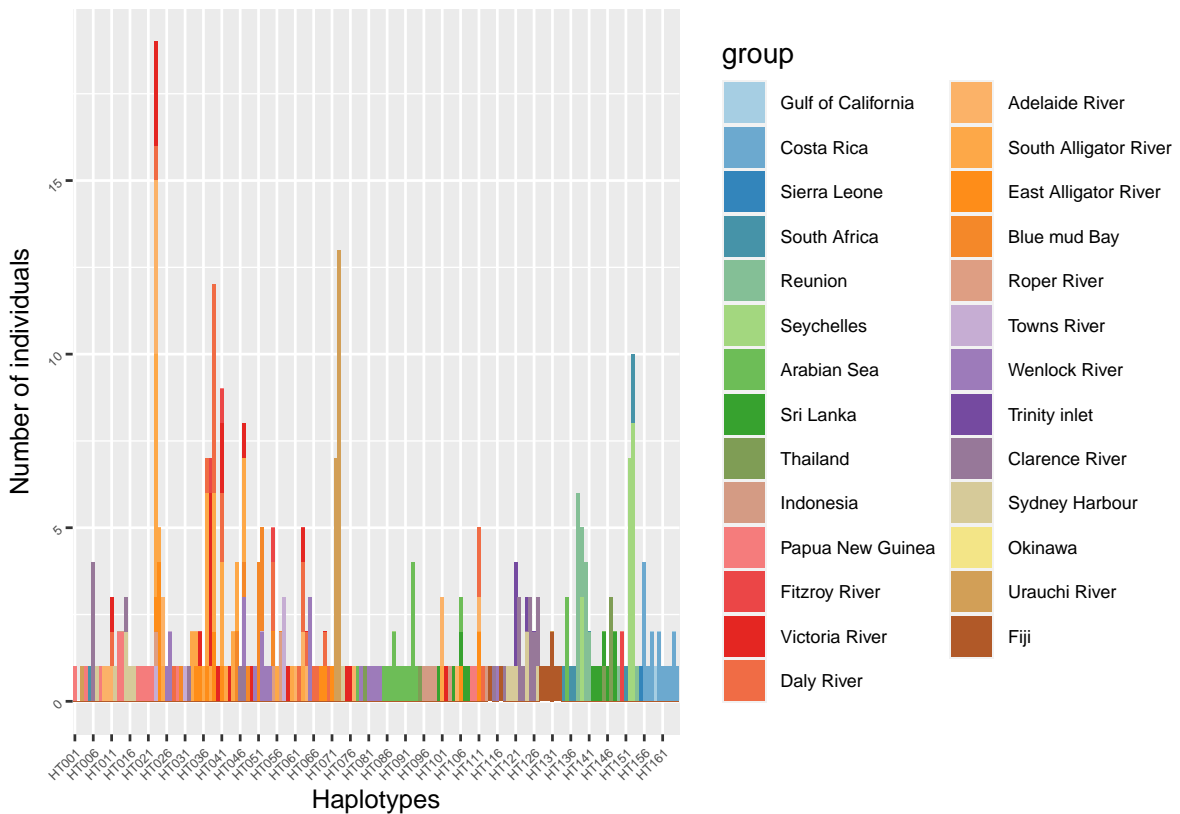

```

ggplot2::ggsave(HT.plot, filename = "HT_barplot_per_Location.png", width = 30,
  height = 15, units = "cm")

```

```

## [1] "Gulf of California"
## [1] "Mitogenome base composition:"
##      A      T      G      C
## 0.3151972 0.2423535 0.1307236 0.3117256
## [1] "Costa Rica"
## [1] "Mitogenome base composition:"
##      A      T      G      C

```

```

## 0.3151516 0.2424022 0.1307582 0.3116879
## [1] "Sierra Leone"
## [1] "Mitogenome base composition:"
##      A      T      G      C
## 0.3145576 0.2423680 0.1312702 0.3118041
## [1] "South Africa"
## [1] "Mitogenome base composition:"
##      A      T      G      C
## 0.3148254 0.2429858 0.1309720 0.3112168
## [1] "Reunion"
## [1] "Mitogenome base composition:"
##      A      T      G      C
## 0.3148585 0.2431229 0.1309273 0.3110912
## [1] "Seychelles"
## [1] "Mitogenome base composition:"
##      A      T      G      C
## 0.3149296 0.2427989 0.1309067 0.3113648
## [1] "Arabian Sea"
## [1] "Mitogenome base composition:"
##      A      T      G      C
## 0.3146861 0.2433287 0.1310578 0.3109275
## [1] "Sri Lanka"
## [1] "Mitogenome base composition:"
##      A      T      G      C
## 0.3147039 0.2430626 0.1310614 0.3111722
## [1] "Thailand"
## [1] "Mitogenome base composition:"
##      A      T      G      C
## 0.3147902 0.2430688 0.1310021 0.3111388
## [1] "Indonesia"
## [1] "Mitogenome base composition:"
##      A      T      G      C
## 0.3145539 0.2432308 0.1311531 0.3110621
## [1] "Papua New Guinea"
## [1] "Mitogenome base composition:"
##      A      T      G      C
## 0.3145063 0.2429284 0.1312395 0.3113257
## [1] "Fitzroy River"
## [1] "Mitogenome base composition:"
##      A      T      G      C
## 0.3146811 0.2429575 0.1311042 0.3112572
## [1] "Victoria River"
## [1] "Mitogenome base composition:"
##      A      T      G      C
## 0.3144800 0.2431203 0.1312718 0.3111278
## [1] "Daly River"
## [1] "Mitogenome base composition:"
##      A      T      G      C
## 0.3145202 0.2431297 0.1312253 0.3111248
## [1] "Adelaide River"
## [1] "Mitogenome base composition:"
##      A      T      G      C
## 0.3144881 0.2430869 0.1312493 0.3111758
## [1] "South Alligator River"
## [1] "Mitogenome base composition:"
##      A      T      G      C
## 0.3144745 0.2430951 0.1312734 0.3111570
## [1] "East Alligator River"

```



```

## [1] "Mitogenome base composition:"
##      A      T      G      C
## 0.3145003 0.2431766 0.1312349 0.3110882
## [1] "Blue mud Bay"
## [1] "Mitogenome base composition:"
##      A      T      G      C
## 0.3144696 0.2430240 0.1312830 0.3112234
## [1] "Roper River"
## [1] "Mitogenome base composition:"
##      A      T      G      C
## 0.3144773 0.2430786 0.1313041 0.3111400
## [1] "Towns River"
## [1] "Mitogenome base composition:"
##      A      T      G      C
## 0.3144650 0.2430620 0.1313124 0.3111606
## [1] "Wenlock River"
## [1] "Mitogenome base composition:"
##      A      T      G      C
## 0.3145160 0.2430987 0.1312248 0.3111606
## [1] "Trinity inlet"
## [1] "Mitogenome base composition:"
##      A      T      G      C
## 0.3146261 0.2429249 0.1311603 0.3112887
## [1] "Clarence River"
## [1] "Mitogenome base composition:"
##      A      T      G      C
## 0.3145786 0.2429470 0.1311568 0.3113176
## [1] "Sydney Harbour"
## [1] "Mitogenome base composition:"
##      A      T      G      C
## 0.3145503 0.2429270 0.1312004 0.3113223
## [1] "Okinawa "
## [1] "Mitogenome base composition:"
##      A      T      G      C
## 0.3147088 0.2429724 0.1310459 0.3112729
## [1] "Urauchi River"
## [1] "Mitogenome base composition:"
##      A      T      G      C
## 0.3146495 0.2431236 0.1311374 0.3110895
## [1] "Fiji"
## [1] "Mitogenome base composition:"
##      A      T      G      C
## 0.3146038 0.2429049 0.1311531 0.3113381

```

Table 55: Nucleotide divergence between each Location

|     | strata.1           | strata.2           | dA        | mean      | q.0       | q.0.025   | q.0.5     | q.0.975   | q.1       |
|-----|--------------------|--------------------|-----------|-----------|-----------|-----------|-----------|-----------|-----------|
| 297 | Sierra Leone       | South Africa       | 0.0081950 | 0.0091702 | 0.0089820 | 0.0089820 | 0.0092814 | 0.0092814 | 0.0092814 |
| 206 | Gulf of California | South Africa       | 0.0081779 | 0.0091531 | 0.0089820 | 0.0089820 | 0.0091617 | 0.0093832 | 0.0094012 |
| 200 | Gulf of California | Okinawa            | 0.0088263 | 0.0091138 | 0.0090419 | 0.0090419 | 0.0091617 | 0.0091617 | 0.0091617 |
| 202 | Gulf of California | Reunion            | 0.0089646 | 0.0091093 | 0.0090419 | 0.0090419 | 0.0091617 | 0.0091617 | 0.0091617 |
| 263 | Reunion            | Sierra Leone       | 0.0089646 | 0.0091093 | 0.0090419 | 0.0090419 | 0.0091617 | 0.0091617 | 0.0091617 |
| 111 | Costa Rica         | South Africa       | 0.0079994 | 0.0091092 | 0.0088623 | 0.0088623 | 0.0091018 | 0.0094012 | 0.0094012 |
| 34  | Arabian Sea        | Gulf of California | 0.0082085 | 0.0091049 | 0.0089222 | 0.0089760 | 0.0091018 | 0.0092545 | 0.0092814 |
| 199 | Gulf of California | Indonesia          | 0.0088583 | 0.0090818 | 0.0089820 | 0.0089970 | 0.0091018 | 0.0091018 | 0.0091018 |
| 105 | Costa Rica         | Okinawa            | 0.0086478 | 0.0090699 | 0.0089222 | 0.0089222 | 0.0090419 | 0.0091617 | 0.0091617 |
| 201 | Gulf of California | Papua New Guinea   | 0.0087505 | 0.0090659 | 0.0089222 | 0.0089222 | 0.0091018 | 0.0092006 | 0.0092216 |
| 107 | Costa Rica         | Reunion            | 0.0087861 | 0.0090654 | 0.0089222 | 0.0089222 | 0.0090419 | 0.0091617 | 0.0091617 |
| 29  | Arabian Sea        | Costa Rica         | 0.0080300 | 0.0090610 | 0.0088024 | 0.0088683 | 0.0090419 | 0.0092216 | 0.0092814 |
| 213 | Gulf of California | Urauchi River      | 0.0089963 | 0.0090476 | 0.0090419 | 0.0090419 | 0.0090419 | 0.0091018 | 0.0091617 |
| 104 | Costa Rica         | Indonesia          | 0.0086798 | 0.0090379 | 0.0088623 | 0.0088757 | 0.0090419 | 0.0091018 | 0.0091018 |
| 210 | Gulf of California | Thailand           | 0.0075689 | 0.0090319 | 0.0089222 | 0.0089296 | 0.0090419 | 0.0091467 | 0.0091617 |
| 41  | Arabian Sea        | Sierra Leone       | 0.0081266 | 0.0090230 | 0.0088024 | 0.0088563 | 0.0089820 | 0.0092814 | 0.0092814 |
| 9   | Adelaide River     | Gulf of California | 0.0086730 | 0.0090220 | 0.0087425 | 0.0088189 | 0.0089820 | 0.0092216 | 0.0092216 |
| 106 | Costa Rica         | Papua New Guinea   | 0.0085720 | 0.0090220 | 0.0088024 | 0.0088383 | 0.0090419 | 0.0092216 | 0.0092216 |
| 163 | Fiji               | Gulf of California | 0.0083350 | 0.0090220 | 0.0089820 | 0.0089820 | 0.0090419 | 0.0090419 | 0.0090419 |

Table 55: Nucleotide divergence between each Location (continued)

|     | strata.1             | strata.2              | dA        | mean      | q.0       | q.0.025   | q.0.5     | q.0.975   | q.1       |
|-----|----------------------|-----------------------|-----------|-----------|-----------|-----------|-----------|-----------|-----------|
| 204 | Gulf of California   | Seychelles            | 0.0088623 | 0.0090120 | 0.0089820 | 0.0089820 | 0.0089820 | 0.0091617 | 0.0091617 |
| 208 | Gulf of California   | Sri Lanka             | 0.0074932 | 0.0090120 | 0.0089222 | 0.0089222 | 0.0089820 | 0.0091452 | 0.0091617 |
| 286 | Seychelles           | Sierra Leone          | 0.0088623 | 0.0090120 | 0.0089820 | 0.0089820 | 0.0089820 | 0.0091617 | 0.0091617 |
| 124 | Daly River           | Gulf of California    | 0.0087076 | 0.0090084 | 0.0087425 | 0.0087425 | 0.0089820 | 0.0092216 | 0.0092216 |
| 215 | Gulf of California   | Wenlock River         | 0.0086977 | 0.0090041 | 0.0088623 | 0.0088892 | 0.0089820 | 0.0091018 | 0.0091018 |
| 118 | Costa Rica           | Urauchi River         | 0.0088178 | 0.0090037 | 0.0089222 | 0.0089222 | 0.0089820 | 0.0091018 | 0.0091617 |
| 209 | Gulf of California   | Sydney Harbour        | 0.0087049 | 0.0089959 | 0.0087425 | 0.0087605 | 0.0090419 | 0.0092635 | 0.0092814 |
| 236 | Okinawa              | Sierra Leone          | 0.0087066 | 0.0089940 | 0.0089222 | 0.0089222 | 0.0090419 | 0.0090419 | 0.0090419 |
| 301 | Sierra Leone         | Thailand              | 0.0075289 | 0.0089920 | 0.0088024 | 0.0088249 | 0.0090419 | 0.0090419 | 0.0090419 |
| 115 | Costa Rica           | Thailand              | 0.0073904 | 0.0089880 | 0.0088024 | 0.0088159 | 0.0089820 | 0.0091617 | 0.0091617 |
| 144 | East Alligator River | Gulf of California    | 0.0087240 | 0.0089785 | 0.0087425 | 0.0087425 | 0.0089820 | 0.0091617 | 0.0091617 |
| 4   | Adelaide River       | Costa Rica            | 0.0084945 | 0.0089780 | 0.0086228 | 0.0086826 | 0.0089222 | 0.0092216 | 0.0092216 |
| 101 | Costa Rica           | Fiji                  | 0.0081565 | 0.0089780 | 0.0088623 | 0.0088623 | 0.0089820 | 0.0090419 | 0.0090419 |
| 214 | Gulf of California   | Victoria River        | 0.0087542 | 0.0089763 | 0.0088623 | 0.0088623 | 0.0089222 | 0.0091617 | 0.0091617 |
| 211 | Gulf of California   | Towns River           | 0.0089042 | 0.0089701 | 0.0089222 | 0.0089281 | 0.0089820 | 0.0089820 | 0.0089820 |
| 109 | Costa Rica           | Seychelles            | 0.0086838 | 0.0089681 | 0.0088623 | 0.0088623 | 0.0089820 | 0.0091617 | 0.0091617 |
| 113 | Costa Rica           | Sri Lanka             | 0.0073147 | 0.0089681 | 0.0088024 | 0.0088024 | 0.0089820 | 0.0091617 | 0.0091617 |
| 99  | Costa Rica           | Daly River            | 0.0085291 | 0.0089645 | 0.0086228 | 0.0086826 | 0.0089820 | 0.0092216 | 0.0092216 |
| 221 | Indonesia            | Sierra Leone          | 0.0087385 | 0.0089621 | 0.0088623 | 0.0088772 | 0.0089820 | 0.0089820 | 0.0089820 |
| 299 | Sierra Leone         | Sri Lanka             | 0.0074433 | 0.0089621 | 0.0088024 | 0.0088024 | 0.0089820 | 0.0091452 | 0.0091617 |
| 120 | Costa Rica           | Wenlock River         | 0.0085192 | 0.0089602 | 0.0087425 | 0.0088024 | 0.0089820 | 0.0091018 | 0.0091018 |
| 58  | Blue mud Bay         | Gulf of California    | 0.0089068 | 0.0089590 | 0.0088623 | 0.0088802 | 0.0089820 | 0.0089820 | 0.0089820 |
| 114 | Costa Rica           | Sydney Harbour        | 0.0085264 | 0.0089519 | 0.0086228 | 0.0086826 | 0.0089820 | 0.0092814 | 0.0092814 |
| 207 | Gulf of California   | South Alligator River | 0.0088432 | 0.0089474 | 0.0088623 | 0.0088623 | 0.0089222 | 0.0090509 | 0.0091617 |
| 181 | Fitzroy River        | Gulf of California    | 0.0073713 | 0.0089461 | 0.0088623 | 0.0088623 | 0.0089222 | 0.0090419 | 0.0090419 |
| 250 | Papua New Guinea     | Sierra Leone          | 0.0086307 | 0.0089461 | 0.0088024 | 0.0088024 | 0.0089820 | 0.0090808 | 0.0091018 |
| 203 | Gulf of California   | Roper River           | 0.0088822 | 0.0089371 | 0.0088623 | 0.0088668 | 0.0089521 | 0.0089820 | 0.0089820 |
| 100 | Costa Rica           | East Alligator River  | 0.0085455 | 0.0089346 | 0.0086228 | 0.0086826 | 0.0089222 | 0.0091617 | 0.0091617 |
| 119 | Costa Rica           | Victoria River        | 0.0085746 | 0.0089313 | 0.0087425 | 0.0087425 | 0.0089222 | 0.0091617 | 0.0091617 |
| 304 | Sierra Leone         | Urauchi River         | 0.0088765 | 0.0089279 | 0.0089222 | 0.0089222 | 0.0089820 | 0.0090419 | 0.0090419 |
| 116 | Costa Rica           | Towns River           | 0.0087257 | 0.0089261 | 0.0088024 | 0.0088024 | 0.0089222 | 0.0089820 | 0.0089820 |
| 53  | Blue mud Bay         | Costa Rica            | 0.0087283 | 0.0089151 | 0.0087425 | 0.0088024 | 0.0089222 | 0.0089820 | 0.0089820 |
| 112 | Costa Rica           | South Alligator River | 0.0086647 | 0.0089035 | 0.0087425 | 0.0088024 | 0.0089222 | 0.0090419 | 0.0091617 |
| 102 | Costa Rica           | Fitzroy River         | 0.0071928 | 0.0089021 | 0.0087425 | 0.0087425 | 0.0088623 | 0.0090419 | 0.0090419 |
| 170 | Fiji                 | Sierra Leone          | 0.0082152 | 0.0089022 | 0.0088623 | 0.0088623 | 0.0089222 | 0.0089222 | 0.0089222 |
| 108 | Costa Rica           | Roper River           | 0.0087037 | 0.0088932 | 0.0087425 | 0.0087425 | 0.0089222 | 0.0089820 | 0.0089820 |
| 16  | Adelaide River       | Sierra Leone          | 0.0085400 | 0.0088889 | 0.0086228 | 0.0086991 | 0.0088623 | 0.0091018 | 0.0091018 |
| 81  | Clarence River       | Gulf of California    | 0.0087257 | 0.0088765 | 0.0087425 | 0.0087725 | 0.0088623 | 0.0091018 | 0.0091018 |
| 300 | Sierra Leone         | Sydney Harbour        | 0.0085851 | 0.0088761 | 0.0086228 | 0.0086407 | 0.0089222 | 0.0091437 | 0.0091617 |
| 188 | Fitzroy River        | Sierra Leone          | 0.0072994 | 0.0088743 | 0.0087425 | 0.0087425 | 0.0088024 | 0.0090419 | 0.0090419 |
| 306 | Sierra Leone         | Wenlock River         | 0.0085653 | 0.0088717 | 0.0088024 | 0.0088024 | 0.0088623 | 0.0089222 | 0.0089222 |
| 131 | Daly River           | Sierra Leone          | 0.0085687 | 0.0088695 | 0.0086228 | 0.0086228 | 0.0088623 | 0.0091018 | 0.0091018 |
| 151 | East Alligator River | Sierra Leone          | 0.0086043 | 0.0088588 | 0.0086228 | 0.0086228 | 0.0088623 | 0.0090419 | 0.0090419 |
| 305 | Sierra Leone         | Victoria River        | 0.0086287 | 0.0088509 | 0.0087425 | 0.0087425 | 0.0088024 | 0.0090419 | 0.0090419 |
| 302 | Sierra Leone         | Towns River           | 0.0087844 | 0.0088503 | 0.0088024 | 0.0088084 | 0.0088623 | 0.0088623 | 0.0088623 |
| 65  | Blue mud Bay         | Sierra Leone          | 0.0087870 | 0.0088392 | 0.0087425 | 0.0087605 | 0.0088623 | 0.0088623 | 0.0088623 |
| 76  | Clarence River       | Costa Rica            | 0.0085472 | 0.0088326 | 0.0086228 | 0.0086826 | 0.0088024 | 0.0091018 | 0.0091018 |
| 298 | Sierra Leone         | South Alligator River | 0.0087203 | 0.0088245 | 0.0087425 | 0.0087425 | 0.0088024 | 0.0089222 | 0.0089222 |
| 275 | Roper River          | Sierra Leone          | 0.0087625 | 0.0088174 | 0.0087425 | 0.0087470 | 0.0088323 | 0.0088623 | 0.0088623 |
| 212 | Gulf of California   | Trinity inlet         | 0.0088024 | 0.0088024 | 0.0088024 | 0.0088024 | 0.0088024 | 0.0088024 | 0.0088024 |
| 88  | Clarence River       | Sierra Leone          | 0.0086116 | 0.0087625 | 0.0086826 | 0.0087425 | 0.0089820 | 0.0089820 | 0.0089820 |
| 117 | Costa Rica           | Trinity inlet         | 0.0086239 | 0.0087585 | 0.0086826 | 0.0086826 | 0.0087425 | 0.0088024 | 0.0088024 |
| 303 | Sierra Leone         | Trinity inlet         | 0.0086826 | 0.0086826 | 0.0086826 | 0.0086826 | 0.0086826 | 0.0086826 | 0.0086826 |
| 205 | Gulf of California   | Sierra Leone          | 0.0063473 | 0.0063473 | 0.0063473 | 0.0063473 | 0.0063473 | 0.0063473 | 0.0063473 |
| 110 | Costa Rica           | Sierra Leone          | 0.0061688 | 0.0063034 | 0.0062275 | 0.0062275 | 0.0062874 | 0.0063473 | 0.0063473 |
| 233 | Okinawa              | Reunion               | 0.0053298 | 0.0057620 | 0.0052695 | 0.0053862 | 0.0058683 | 0.0059880 | 0.0059880 |
| 273 | Reunion              | Wenlock River         | 0.0051835 | 0.0056347 | 0.0052695 | 0.0053293 | 0.0056287 | 0.0058084 | 0.0058084 |
| 13  | Adelaide River       | Reunion               | 0.0051326 | 0.0056262 | 0.0050898 | 0.0052695 | 0.0056287 | 0.0059177 | 0.0059281 |
| 128 | Daly River           | Reunion               | 0.0051775 | 0.0056231 | 0.0050898 | 0.0052695 | 0.0056287 | 0.0059281 | 0.0059281 |
| 148 | East Alligator River | Reunion               | 0.0052036 | 0.0056028 | 0.0050898 | 0.0052695 | 0.0056287 | 0.0058683 | 0.0058683 |
| 247 | Papua New Guinea     | Reunion               | 0.0051292 | 0.0055893 | 0.0052096 | 0.0053278 | 0.0055689 | 0.0059880 | 0.0059880 |
| 272 | Reunion              | Victoria River        | 0.0052170 | 0.0055838 | 0.0052096 | 0.0052695 | 0.0056287 | 0.0058683 | 0.0058683 |
| 62  | Blue mud Bay         | Reunion               | 0.0053863 | 0.0055833 | 0.0052096 | 0.0053293 | 0.0055689 | 0.0058686 | 0.0058686 |
| 267 | Reunion              | Sydney Harbour        | 0.0051384 | 0.0055740 | 0.0050898 | 0.0052201 | 0.0055689 | 0.0059281 | 0.0059281 |
| 265 | Reunion              | South Alligator River | 0.0053227 | 0.0055716 | 0.0052096 | 0.0052695 | 0.0055689 | 0.0057485 | 0.0058683 |
| 218 | Indonesia            | Reunion               | 0.0051981 | 0.0055664 | 0.0052096 | 0.0052545 | 0.0055689 | 0.0058084 | 0.0058084 |
| 271 | Reunion              | Urauchi River         | 0.0053675 | 0.0055635 | 0.0052695 | 0.0052695 | 0.0056287 | 0.0058683 | 0.0059880 |
| 269 | Reunion              | Towns River           | 0.0053164 | 0.0055269 | 0.0052695 | 0.0053293 | 0.0055689 | 0.0058686 | 0.0058686 |
| 261 | Reunion              | Roper River           | 0.0053056 | 0.0055052 | 0.0052096 | 0.0053039 | 0.0055389 | 0.0056287 | 0.0056287 |
| 85  | Clarence River       | Reunion               | 0.0052052 | 0.0055008 | 0.0051497 | 0.0052096 | 0.0055090 | 0.0058686 | 0.0058084 |
| 235 | Okinawa              | Seychelles            | 0.0050579 | 0.0054950 | 0.0052096 | 0.0052096 | 0.0055689 | 0.0059880 | 0.0059880 |
| 270 | Reunion              | Trinity inlet         | 0.0052819 | 0.0054266 | 0.0051497 | 0.0051497 | 0.0054491 | 0.0055090 | 0.0055090 |
| 296 | Seychelles           | Wenlock River         | 0.0049116 | 0.0053677 | 0.0052096 | 0.0052096 | 0.0053293 | 0.0057769 | 0.0058084 |
| 15  | Adelaide River       | Seychelles            | 0.0048607 | 0.0053593 | 0.0050299 | 0.0050299 | 0.0053293 | 0.0058683 | 0.0059281 |
| 130 | Daly River           | Seychelles            | 0.0049056 | 0.0053561 | 0.0050299 | 0.0050299 | 0.0052994 | 0.0058683 | 0.0059281 |
| 249 | Papua New Guinea     | Seychelles            | 0.0048743 | 0.0053393 | 0.0051497 | 0.0051497 | 0.0052695 | 0.0058686 | 0.0059880 |
| 150 | East Alligator River | Seychelles            | 0.0049316 | 0.0053358 | 0.0050299 | 0.0050299 | 0.0053293 | 0.0058084 | 0.0058683 |
| 295 | Seychelles           | Victoria River        | 0.0049494 | 0.0053213 | 0.0051497 | 0.0051497 | 0.0052096 | 0.0057485 | 0.0058683 |
| 64  | Blue mud Bay         | Seychelles            | 0.0051144 | 0.0053163 | 0.0051497 | 0.0051497 | 0.0052695 | 0.0058686 | 0.0058686 |
| 292 | Seychelles           | Towns River           | 0.0050998 | 0.0053154 | 0.0052096 | 0.0052096 | 0.0052695 | 0.0056751 | 0.0056886 |
| 290 | Seychelles           | Sydney Harbour        | 0.0048664 | 0.0053071 | 0.0050299 | 0.0050299 | 0.0052695 | 0.0057695 | 0.0059281 |
| 288 | Seychelles           | South Alligator River | 0.0050508 | 0.0053047 | 0.0051497 | 0.0051497 | 0.0052096 | 0.0056886 | 0.0058683 |
| 220 | Indonesia            | Seychelles            | 0.0049261 | 0.0052994 | 0.0051497 | 0.0051497 | 0.0052695 | 0.0057275 | 0.0058084 |
| 294 | Seychelles           | Urauchi River         | 0.0050955 | 0.0052965 | 0.0052096 | 0.0052096 | 0.0052096 | 0.0056287 | 0.0059880 |

Table 55: Nucleotide divergence between each Location (continued)

|     | strata.1              | strata.2              | dA         | mean      | q.0       | q.0.025   | q.0.5     | q.0.975   | q.1       |
|-----|-----------------------|-----------------------|------------|-----------|-----------|-----------|-----------|-----------|-----------|
| 274 | Roper River           | Seychelles            | 0.0050798  | 0.0052844 | 0.0051497 | 0.0051497 | 0.0052695 | 0.0056287 | 0.0056287 |
| 87  | Clarence River        | Seychelles            | 0.0049333  | 0.0052338 | 0.0050898 | 0.0050898 | 0.0051497 | 0.0056287 | 0.0058084 |
| 293 | Seychelles            | Trinity inlet         | 0.0050100  | 0.0051597 | 0.0050898 | 0.0050898 | 0.0050898 | 0.0055090 | 0.0055090 |
| 237 | Okinawa               | South Africa          | 0.0038785  | 0.0051411 | 0.0015569 | 0.0015569 | 0.0056886 | 0.0061078 | 0.0061078 |
| 167 | Fiji                  | Reunion               | 0.0041974  | 0.0050291 | 0.0003593 | 0.0009581 | 0.0055090 | 0.0056287 | 0.0056287 |
| 315 | South Africa          | Wenlock River         | 0.0037074  | 0.0049890 | 0.0011976 | 0.0012575 | 0.0053892 | 0.0059281 | 0.0059281 |
| 132 | Daly River            | South Africa          | 0.0036989  | 0.0049749 | 0.0009581 | 0.0011587 | 0.0055090 | 0.0060479 | 0.0060479 |
| 17  | Adelaide River        | South Africa          | 0.0036450  | 0.0049691 | 0.0009581 | 0.0011976 | 0.0054491 | 0.0059880 | 0.0060479 |
| 222 | Indonesia             | South Africa          | 0.0037599  | 0.0049587 | 0.0014970 | 0.0016168 | 0.0053892 | 0.0059281 | 0.0059281 |
| 152 | East Alligator River  | South Africa          | 0.0037233  | 0.0049530 | 0.0011377 | 0.0012545 | 0.0054491 | 0.0059880 | 0.0059880 |
| 313 | South Africa          | Urauchi River         | 0.0039256  | 0.0049521 | 0.0015569 | 0.0015569 | 0.0053293 | 0.0057485 | 0.0061078 |
| 314 | South Africa          | Victoria River        | 0.0037316  | 0.0049289 | 0.0009581 | 0.0011976 | 0.0053892 | 0.0059880 | 0.0059880 |
| 66  | Blue mud Bay          | South Africa          | 0.0038940  | 0.0049214 | 0.0011377 | 0.0011976 | 0.0053892 | 0.0058084 | 0.0058084 |
| 307 | South Africa          | South Alligator River | 0.0038322  | 0.0049115 | 0.0011377 | 0.0011976 | 0.0053293 | 0.0058683 | 0.0059880 |
| 251 | Papua New Guinea      | South Africa          | 0.0036145  | 0.0049050 | 0.0006587 | 0.0007784 | 0.0053892 | 0.0060000 | 0.0061078 |
| 309 | South Africa          | Sydney Harbour        | 0.0036342  | 0.0049003 | 0.0007784 | 0.0007934 | 0.0054491 | 0.0060329 | 0.0060479 |
| 311 | South Africa          | Towns River           | 0.0038503  | 0.0048914 | 0.0011976 | 0.0012485 | 0.0052695 | 0.0058084 | 0.0058084 |
| 38  | Arabian Sea           | Reunion               | 0.0038407  | 0.0048818 | 0.0002395 | 0.0002395 | 0.0056886 | 0.0059536 | 0.0059880 |
| 276 | Roper River           | South Africa          | 0.0038352  | 0.0048653 | 0.0011377 | 0.0011781 | 0.0052695 | 0.0057485 | 0.0057485 |
| 89  | Clarence River        | South Africa          | 0.0037373  | 0.0048633 | 0.0007784 | 0.0012754 | 0.0052695 | 0.0058084 | 0.0059281 |
| 169 | Fiji                  | Seychelles            | 0.0039726  | 0.0048093 | 0.0002994 | 0.0002994 | 0.0053293 | 0.0056287 | 0.0056287 |
| 312 | South Africa          | Trinity inlet         | 0.0038238  | 0.0047990 | 0.0013174 | 0.0013174 | 0.0052096 | 0.0056287 | 0.0056287 |
| 40  | Arabian Sea           | Seychelles            | 0.0037038  | 0.0047500 | 0.0003593 | 0.0007680 | 0.0053892 | 0.0058368 | 0.0059880 |
| 171 | Fiji                  | South Africa          | 0.0029002  | 0.0045623 | 0.0002994 | 0.0003653 | 0.0053892 | 0.0057485 | 0.0057485 |
| 42  | Arabian Sea           | South Africa          | 0.0026248  | 0.0044964 | 0.0001198 | 0.0001198 | 0.0054491 | 0.0060479 | 0.0061078 |
| 241 | Okinawa               | Thailand              | 0.0022315  | 0.0039820 | 0.0003593 | 0.0003593 | 0.0052695 | 0.0057485 | 0.0057485 |
| 255 | Papua New Guinea      | Thailand              | 0.0021450  | 0.0039235 | 0.0002395 | 0.0003593 | 0.0053293 | 0.0057350 | 0.0057485 |
| 337 | Thailand              | Towns River           | 0.0023812  | 0.0039102 | 0.0007186 | 0.0007620 | 0.0053892 | 0.0054491 | 0.0054491 |
| 70  | Blue mud Bay          | Thailand              | 0.0023838  | 0.0038991 | 0.0006587 | 0.0007186 | 0.0053892 | 0.0054491 | 0.0054491 |
| 331 | Sydney Harbour        | Thailand              | 0.0021267  | 0.0038807 | 0.0005389 | 0.0005988 | 0.0052695 | 0.0056287 | 0.0056287 |
| 280 | Roper River           | Thailand              | 0.0023593  | 0.0038772 | 0.0006587 | 0.0006931 | 0.0053293 | 0.0054491 | 0.0054491 |
| 318 | South Alligator River | Thailand              | 0.0023087  | 0.0038759 | 0.0002395 | 0.0006587 | 0.0053293 | 0.0055090 | 0.0055689 |
| 21  | Adelaide River        | Thailand              | 0.0020592  | 0.0038711 | 0.0001796 | 0.0002799 | 0.0053293 | 0.0055689 | 0.0056287 |
| 340 | Thailand              | Victoria River        | 0.0021818  | 0.0038670 | 0.0003593 | 0.0004940 | 0.0053293 | 0.0055090 | 0.0055689 |
| 136 | Daly River            | Thailand              | 0.0020864  | 0.0038503 | 0.0001796 | 0.0002994 | 0.0053293 | 0.0055689 | 0.0056287 |
| 341 | Thailand              | Wenlock River         | 0.0020802  | 0.0038497 | 0.0001796 | 0.0002395 | 0.0053892 | 0.0055090 | 0.0055090 |
| 156 | East Alligator River  | Thailand              | 0.0021271  | 0.0038447 | 0.0001796 | 0.0002710 | 0.0053293 | 0.0055090 | 0.0055689 |
| 93  | Clarence River        | Thailand              | 0.0022027  | 0.0038167 | 0.0005988 | 0.0005988 | 0.0052695 | 0.0055015 | 0.0055689 |
| 226 | Indonesia             | Thailand              | 0.0020592  | 0.0037458 | 0.0002994 | 0.0004042 | 0.0052096 | 0.0055689 | 0.0055689 |
| 338 | Thailand              | Trinity inlet         | 0.0022794  | 0.0037425 | 0.0005988 | 0.0005988 | 0.0052395 | 0.0052695 | 0.0052695 |
| 175 | Fiji                  | Thailand              | 0.0015703  | 0.0037203 | 0.0000599 | 0.0003593 | 0.0054192 | 0.0055090 | 0.0055090 |
| 185 | Fitzroy River         | Reunion               | 0.0020005  | 0.0037201 | 0.0002395 | 0.0003563 | 0.0054491 | 0.0056287 | 0.0056287 |
| 339 | Thailand              | Urauchi River         | 0.0021920  | 0.0037064 | 0.0003593 | 0.0003593 | 0.0052695 | 0.0056437 | 0.0057485 |
| 46  | Arabian Sea           | Thailand              | 0.0012181  | 0.0035776 | 0.0001198 | 0.0001198 | 0.0053892 | 0.0057695 | 0.0058683 |
| 239 | Okinawa               | Sri Lanka             | 0.0017706  | 0.0035768 | 0.0003593 | 0.0003593 | 0.0052695 | 0.0058683 | 0.0058683 |
| 253 | Papua New Guinea      | Sri Lanka             | 0.0016908  | 0.0035250 | 0.0002395 | 0.0002994 | 0.0053293 | 0.0056886 | 0.0058683 |
| 326 | Sri Lanka             | Towns River           | 0.0019163  | 0.0035010 | 0.0007186 | 0.0007470 | 0.0053892 | 0.0055090 | 0.0055090 |
| 68  | Blue mud Bay          | Sri Lanka             | 0.0019174  | 0.0034884 | 0.0006587 | 0.0007186 | 0.0053293 | 0.0055090 | 0.0055090 |
| 324 | Sri Lanka             | Sydney Harbour        | 0.0016760  | 0.0034857 | 0.0003593 | 0.0004716 | 0.0052096 | 0.0056886 | 0.0058084 |
| 278 | Roper River           | Sri Lanka             | 0.0018944  | 0.0034681 | 0.0006587 | 0.0006692 | 0.0053293 | 0.0054985 | 0.0055090 |
| 316 | South Alligator River | Sri Lanka             | 0.0018413  | 0.0034643 | 0.0000599 | 0.0006587 | 0.0053293 | 0.0055090 | 0.0057485 |
| 329 | Sri Lanka             | Victoria River        | 0.0017100  | 0.0034510 | 0.0001796 | 0.0002994 | 0.0053293 | 0.0056287 | 0.0057485 |
| 19  | Adelaide River        | Sri Lanka             | 0.0015829  | 0.0034506 | 0.0000599 | 0.0000823 | 0.0053293 | 0.0056886 | 0.0058084 |
| 134 | Daly River            | Sri Lanka             | 0.0016279  | 0.0034475 | 0.0001796 | 0.0002395 | 0.0052695 | 0.0056886 | 0.0058084 |
| 330 | Sri Lanka             | Wenlock River         | 0.0016216  | 0.0034468 | 0.0002395 | 0.0002994 | 0.0053293 | 0.0056287 | 0.0056886 |
| 189 | Fitzroy River         | South Africa          | 0.0008871  | 0.0034371 | 0.0001796 | 0.0001796 | 0.0051497 | 0.0057485 | 0.0057485 |
| 154 | East Alligator River  | Sri Lanka             | 0.0016604  | 0.0034337 | 0.0000000 | 0.0001796 | 0.0052695 | 0.0056287 | 0.0056886 |
| 91  | Clarence River        | Sri Lanka             | 0.0017402  | 0.0034098 | 0.0005988 | 0.0005988 | 0.0052096 | 0.0055090 | 0.0056886 |
| 173 | Fiji                  | Sri Lanka             | 0.0011952  | 0.0034010 | 0.0000599 | 0.0003398 | 0.0052695 | 0.0055090 | 0.0055090 |
| 327 | Sri Lanka             | Trinity inlet         | 0.0018146  | 0.0033333 | 0.0005988 | 0.0005988 | 0.0051796 | 0.0053892 | 0.0053892 |
| 44  | Arabian Sea           | Sri Lanka             | 0.0009149  | 0.0033302 | 0.0000000 | 0.0003593 | 0.0053293 | 0.0057485 | 0.0058084 |
| 328 | Sri Lanka             | Urauchi River         | 0.0017366  | 0.0033067 | 0.0003593 | 0.0003593 | 0.0052096 | 0.0056392 | 0.0058683 |
| 224 | Indonesia             | Sri Lanka             | 0.0015436  | 0.0032859 | 0.0001198 | 0.0001662 | 0.0051796 | 0.0055823 | 0.0056886 |
| 187 | Fitzroy River         | Seychelles            | 0.0015589  | 0.0032834 | 0.0001796 | 0.0001796 | 0.0051497 | 0.0056153 | 0.0056287 |
| 193 | Fitzroy River         | Thailand              | 0.0000898  | 0.0031277 | 0.0004192 | 0.0004192 | 0.0052695 | 0.0053892 | 0.0053892 |
| 191 | Fitzroy River         | Sri Lanka             | -0.0000158 | 0.0030778 | 0.0004192 | 0.0004192 | 0.0052695 | 0.0053892 | 0.0054491 |
| 33  | Arabian Sea           | Fitzroy River         | 0.0004156  | 0.0028869 | 0.0006587 | 0.0007395 | 0.0010778 | 0.0057275 | 0.0057485 |
| 308 | South Africa          | Sri Lanka             | 0.0003717  | 0.0028657 | 0.0002395 | 0.0002395 | 0.0013174 | 0.0058638 | 0.0058683 |
| 266 | Reunion               | Sri Lanka             | 0.0011883  | 0.0028518 | 0.0002994 | 0.0004057 | 0.0010180 | 0.0057485 | 0.0057485 |
| 183 | Fitzroy River         | Okinawa               | 0.0008970  | 0.0027593 | 0.0007784 | 0.0007784 | 0.0010778 | 0.0056287 | 0.0056287 |
| 325 | Sri Lanka             | Thailand              | -0.0002457 | 0.0027362 | 0.0000000 | 0.0000599 | 0.0009581 | 0.0055090 | 0.0055689 |
| 162 | Fiji                  | Fitzroy River         | 0.0004381  | 0.0026999 | 0.0004790 | 0.0005030 | 0.0008383 | 0.0053892 | 0.0053892 |
| 182 | Fitzroy River         | Indonesia             | 0.0008204  | 0.0026188 | 0.0007186 | 0.0007186 | 0.0008982 | 0.0054491 | 0.0054491 |
| 196 | Fitzroy River         | Urauchi River         | 0.0009743  | 0.0026005 | 0.0007784 | 0.0007784 | 0.0008383 | 0.0052695 | 0.0056287 |
| 310 | South Africa          | Thailand              | 0.0001095  | 0.0025478 | 0.0002395 | 0.0002410 | 0.0011976 | 0.0058683 | 0.0058683 |
| 289 | Seychelles            | Sri Lanka             | 0.0008598  | 0.0025283 | 0.0002395 | 0.0002395 | 0.0009281 | 0.0056886 | 0.0057485 |
| 184 | Fitzroy River         | Papua New Guinea      | 0.0006311  | 0.0025214 | 0.0001796 | 0.0002305 | 0.0007186 | 0.0055778 | 0.0056287 |
| 192 | Fitzroy River         | Sydney Harbour        | 0.0006436  | 0.0025094 | 0.0005389 | 0.0005389 | 0.0007186 | 0.0055329 | 0.0055689 |
| 268 | Reunion               | Thailand              | 0.0008847  | 0.0024925 | 0.0002994 | 0.0003593 | 0.0010778 | 0.0057485 | 0.0057485 |
| 8   | Adelaide River        | Fitzroy River         | 0.0005114  | 0.0024351 | 0.0000599 | 0.0000599 | 0.0008982 | 0.0055090 | 0.0055689 |
| 80  | Clarence River        | Fitzroy River         | 0.0006958  | 0.0024214 | 0.0000599 | 0.0000599 | 0.0006587 | 0.0053293 | 0.0054491 |
| 198 | Fitzroy River         | Wenlock River         | 0.0005329  | 0.0024141 | 0.0000599 | 0.0000599 | 0.0008383 | 0.0054491 | 0.0054491 |
| 123 | Daly River            | Fitzroy River         | 0.0005244  | 0.0024000 | 0.0000000 | 0.0000000 | 0.0008982 | 0.0055689 | 0.0055689 |
| 195 | Fitzroy River         | Trinity inlet         | 0.0008204  | 0.0023952 | 0.0005389 | 0.0005389 | 0.0005988 | 0.0051497 | 0.0051497 |

Table 55: Nucleotide divergence between each Location (continued)

|     | strata.1              | strata.2              | dA        | mean      | q.0       | q.0.025   | q.0.5     | q.0.975   | q.1       |
|-----|-----------------------|-----------------------|-----------|-----------|-----------|-----------|-----------|-----------|-----------|
| 143 | East Alligator River  | Fitzroy River         | 0.0005053 | 0.0023346 | 0.0000000 | 0.0000599 | 0.0008383 | 0.0055090 | 0.0055090 |
| 197 | Fitzroy River         | Victoria River        | 0.0004836 | 0.0022806 | 0.0000000 | 0.0000000 | 0.0008383 | 0.0055090 | 0.0055090 |
| 194 | Fitzroy River         | Towns River           | 0.0005629 | 0.0022036 | 0.0000599 | 0.0000599 | 0.0001796 | 0.0053293 | 0.0053293 |
| 190 | Fitzroy River         | South Alligator River | 0.0005145 | 0.0021935 | 0.0000000 | 0.0000000 | 0.0001198 | 0.0053892 | 0.0055090 |
| 57  | Blue mud Bay          | Fitzroy River         | 0.0005655 | 0.0021925 | 0.0000000 | 0.0000359 | 0.0001796 | 0.0053293 | 0.0053293 |
| 186 | Fitzroy River         | Roper River           | 0.0005409 | 0.0021707 | 0.0000000 | 0.0000000 | 0.0001497 | 0.0053293 | 0.0053293 |
| 32  | Arabian Sea           | Fiji                  | 0.0004830 | 0.0020664 | 0.0007186 | 0.0008383 | 0.0010180 | 0.0057485 | 0.0057485 |
| 291 | Seychelles            | Thailand              | 0.0004431 | 0.0020559 | 0.0002395 | 0.0002395 | 0.0002994 | 0.0056677 | 0.0057485 |
| 37  | Arabian Sea           | Papua New Guinea      | 0.0005237 | 0.0017355 | 0.0002395 | 0.0003593 | 0.0010778 | 0.0058084 | 0.0061078 |
| 47  | Arabian Sea           | Towns River           | 0.0007320 | 0.0016943 | 0.0007186 | 0.0007784 | 0.0009581 | 0.0057874 | 0.0058084 |
| 27  | Arabian Sea           | Blue mud Bay          | 0.0007450 | 0.0016936 | 0.0006587 | 0.0007784 | 0.0009581 | 0.0058084 | 0.0058084 |
| 45  | Arabian Sea           | Sydney Harbour        | 0.0005045 | 0.0016919 | 0.0003593 | 0.0006587 | 0.0010180 | 0.0058683 | 0.0059880 |
| 36  | Arabian Sea           | Okinawa               | 0.0005079 | 0.0016918 | 0.0003593 | 0.0004790 | 0.0010778 | 0.0061078 | 0.0061078 |
| 39  | Arabian Sea           | Roper River           | 0.0007119 | 0.0016633 | 0.0006587 | 0.0007710 | 0.0008982 | 0.0057485 | 0.0057485 |
| 43  | Arabian Sea           | South Alligator River | 0.0006600 | 0.0016606 | 0.0005999 | 0.0005988 | 0.0008982 | 0.0058084 | 0.0059880 |
| 50  | Arabian Sea           | Victoria River        | 0.0005133 | 0.0016319 | 0.0001796 | 0.0005389 | 0.0008982 | 0.0058683 | 0.0059880 |
| 28  | Arabian Sea           | Clarence River        | 0.0005690 | 0.0016163 | 0.0005988 | 0.0006587 | 0.0008383 | 0.0057485 | 0.0059281 |
| 1   | Adelaide River        | Arabian Sea           | 0.0003674 | 0.0016127 | 0.0000599 | 0.0003308 | 0.0008982 | 0.0059281 | 0.0059880 |
| 165 | Fiji                  | Okinawa               | 0.0006025 | 0.0015768 | 0.0008383 | 0.0008383 | 0.0011377 | 0.0057485 | 0.0057485 |
| 30  | Arabian Sea           | Daly River            | 0.0003677 | 0.0015650 | 0.0001796 | 0.0002994 | 0.0008383 | 0.0059880 | 0.0060479 |
| 31  | Arabian Sea           | East Alligator River  | 0.0004134 | 0.0015643 | 0.0000000 | 0.0002994 | 0.0008982 | 0.0059281 | 0.0059880 |
| 51  | Arabian Sea           | Wenlock River         | 0.0003530 | 0.0015559 | 0.0002395 | 0.0002994 | 0.0008982 | 0.0058683 | 0.0059281 |
| 48  | Arabian Sea           | Trinity inlet         | 0.0006415 | 0.0015380 | 0.0005988 | 0.0005988 | 0.0007784 | 0.0056287 | 0.0056287 |
| 166 | Fiji                  | Papua New Guinea      | 0.0004459 | 0.0014482 | 0.0005988 | 0.0006587 | 0.0009581 | 0.0054491 | 0.0057485 |
| 35  | Arabian Sea           | Indonesia             | 0.0003155 | 0.0014355 | 0.0001198 | 0.0002395 | 0.0005988 | 0.0057305 | 0.0059281 |
| 7   | Adelaide River        | Fiji                  | 0.0003953 | 0.0014312 | 0.0005988 | 0.0006587 | 0.0008982 | 0.0056744 | 0.0056886 |
| 178 | Fiji                  | Urauchi River         | 0.0006916 | 0.0014298 | 0.0008383 | 0.0008383 | 0.0009581 | 0.0053892 | 0.0057485 |
| 164 | Fiji                  | Indonesia             | 0.0005111 | 0.0014216 | 0.0007186 | 0.0007186 | 0.0009581 | 0.0054491 | 0.0056889 |
| 122 | Daly River            | Fiji                  | 0.0004161 | 0.0014039 | 0.0005988 | 0.0006347 | 0.0008982 | 0.0055928 | 0.0056886 |
| 180 | Fiji                  | Wenlock River         | 0.0003909 | 0.0013842 | 0.0004192 | 0.0004790 | 0.0008982 | 0.0055090 | 0.0056889 |
| 49  | Arabian Sea           | Urauchi River         | 0.0004341 | 0.0013819 | 0.0003593 | 0.0003593 | 0.0005389 | 0.0057485 | 0.0061078 |
| 142 | East Alligator River  | Fiji                  | 0.0004319 | 0.0013733 | 0.0005988 | 0.0005988 | 0.0008982 | 0.0055090 | 0.0056287 |
| 179 | Fiji                  | Victoria River        | 0.0004640 | 0.0013731 | 0.0007186 | 0.0007186 | 0.0008383 | 0.0054491 | 0.0056287 |
| 176 | Fiji                  | Towns River           | 0.0006191 | 0.0013719 | 0.0007784 | 0.0007784 | 0.0008982 | 0.0054491 | 0.0054491 |
| 56  | Blue mud Bay          | Fiji                  | 0.0006217 | 0.0013609 | 0.0007186 | 0.0007725 | 0.0008383 | 0.0054491 | 0.0054491 |
| 172 | Fiji                  | South Alligator River | 0.0005574 | 0.0013485 | 0.0007186 | 0.0007186 | 0.0008383 | 0.0054491 | 0.0056287 |
| 168 | Fiji                  | Roper River           | 0.0005971 | 0.0013390 | 0.0007186 | 0.0007186 | 0.0008383 | 0.0054491 | 0.0054491 |
| 264 | Reunion               | South Africa          | 0.0001344 | 0.0012543 | 0.0000599 | 0.0001527 | 0.0008982 | 0.0050299 | 0.0050299 |
| 287 | Seychelles            | South Africa          | 0.0000627 | 0.0011876 | 0.0000000 | 0.0000000 | 0.0010778 | 0.0046108 | 0.0050299 |
| 174 | Fiji                  | Sydney Harbour        | 0.0001813 | 0.0011592 | 0.0001796 | 0.0001796 | 0.0008383 | 0.0055090 | 0.0056886 |
| 240 | Okinawa               | Sydney Harbour        | 0.0004663 | 0.0010447 | 0.0006587 | 0.0006722 | 0.0010180 | 0.0014371 | 0.0014371 |
| 242 | Okinawa               | Towns River           | 0.0006766 | 0.0010299 | 0.0008383 | 0.0008383 | 0.0010778 | 0.0011377 | 0.0011377 |
| 232 | Okinawa               | Papua New Guinea      | 0.0004255 | 0.0010283 | 0.0003593 | 0.0003593 | 0.0010180 | 0.0013772 | 0.0013772 |
| 60  | Blue mud Bay          | Okinawa               | 0.0006793 | 0.0010189 | 0.0007784 | 0.0007919 | 0.0010778 | 0.0011377 | 0.0011377 |
| 11  | Adelaide River        | Okinawa               | 0.0003657 | 0.0010020 | 0.0002994 | 0.0003593 | 0.0010778 | 0.0014970 | 0.0014970 |
| 234 | Okinawa               | Roper River           | 0.0006547 | 0.0009970 | 0.0007784 | 0.0007784 | 0.0010180 | 0.0011377 | 0.0011377 |
| 238 | Okinawa               | South Alligator River | 0.0006018 | 0.0009934 | 0.0003593 | 0.0007784 | 0.0010778 | 0.0011976 | 0.0011976 |
| 245 | Okinawa               | Victoria River        | 0.0004822 | 0.0009917 | 0.0004790 | 0.0005988 | 0.0010778 | 0.0013832 | 0.0014371 |
| 217 | Indonesia             | Papua New Guinea      | 0.0004378 | 0.0009767 | 0.0002994 | 0.0004192 | 0.0010778 | 0.0011976 | 0.0012575 |
| 126 | Daly River            | Okinawa               | 0.0003747 | 0.0009629 | 0.0002994 | 0.0002994 | 0.0010180 | 0.0013174 | 0.0014371 |
| 246 | Okinawa               | Wenlock River         | 0.0003655 | 0.0009593 | 0.0003593 | 0.0004192 | 0.0010778 | 0.0011976 | 0.0011976 |
| 146 | East Alligator River  | Okinawa               | 0.0004091 | 0.0009510 | 0.0002994 | 0.0002994 | 0.0009581 | 0.0011976 | 0.0011976 |
| 83  | Clarence River        | Okinawa               | 0.0005038 | 0.0009421 | 0.0007186 | 0.0007186 | 0.0009581 | 0.0012575 | 0.0012575 |
| 79  | Clarence River        | Fiji                  | 0.0000972 | 0.0009350 | 0.0001796 | 0.0001796 | 0.0002994 | 0.0053473 | 0.0056889 |
| 258 | Papua New Guinea      | Urauchi River         | 0.0005602 | 0.0009269 | 0.0003593 | 0.0003593 | 0.0010180 | 0.0012066 | 0.0013772 |
| 227 | Indonesia             | Towns River           | 0.0006367 | 0.0009261 | 0.0007784 | 0.0008219 | 0.0009581 | 0.0009581 | 0.0009581 |
| 59  | Blue mud Bay          | Indonesia             | 0.0006393 | 0.0009151 | 0.0007186 | 0.0007784 | 0.0009581 | 0.0009581 | 0.0009581 |
| 216 | Indonesia             | Okinawa               | 0.0003952 | 0.0009062 | 0.0004192 | 0.0004192 | 0.0010778 | 0.0012575 | 0.0012575 |
| 343 | Towns River           | Urauchi River         | 0.0007804 | 0.0008976 | 0.0008383 | 0.0008383 | 0.0008982 | 0.0011377 | 0.0011377 |
| 334 | Sydney Harbour        | Urauchi River         | 0.0005548 | 0.0008971 | 0.0006587 | 0.0006587 | 0.0008383 | 0.0011976 | 0.0014371 |
| 225 | Indonesia             | Sydney Harbour        | 0.0003822 | 0.0008967 | 0.0003593 | 0.0004790 | 0.0008982 | 0.0012575 | 0.0012575 |
| 219 | Indonesia             | Roper River           | 0.0006148 | 0.0008932 | 0.0007186 | 0.0007530 | 0.0008982 | 0.0009581 | 0.0009581 |
| 73  | Blue mud Bay          | Urauchi River         | 0.0007830 | 0.0008866 | 0.0007784 | 0.0007784 | 0.0008982 | 0.0011377 | 0.0011377 |
| 223 | Indonesia             | South Alligator River | 0.0005495 | 0.0008772 | 0.0000599 | 0.0006198 | 0.0008982 | 0.0010180 | 0.0011377 |
| 283 | Roper River           | Urauchi River         | 0.0007585 | 0.0008647 | 0.0007784 | 0.0007784 | 0.0008982 | 0.0010734 | 0.0011377 |
| 243 | Okinawa               | Trinity inlet         | 0.0005749 | 0.0008623 | 0.0007186 | 0.0007186 | 0.0009581 | 0.0009581 | 0.0009581 |
| 321 | South Alligator River | Urauchi River         | 0.0006951 | 0.0008506 | 0.0003593 | 0.0005808 | 0.0008383 | 0.0010778 | 0.0011976 |
| 260 | Papua New Guinea      | Wenlock River         | 0.0002140 | 0.0008358 | 0.0002395 | 0.0002994 | 0.0008383 | 0.0011377 | 0.0011976 |
| 230 | Indonesia             | Victoria River        | 0.0003831 | 0.0008288 | 0.0000599 | 0.0001796 | 0.0008982 | 0.0012575 | 0.0012575 |
| 349 | Urauchi River         | Victoria River        | 0.0005482 | 0.0008216 | 0.0004790 | 0.0004790 | 0.0008383 | 0.0011976 | 0.0014371 |
| 127 | Daly River            | Papua New Guinea      | 0.0001985 | 0.0008147 | 0.0001796 | 0.0002395 | 0.0007186 | 0.0012575 | 0.0014371 |
| 96  | Clarence River        | Urauchi River         | 0.0006076 | 0.0008098 | 0.0007186 | 0.0007186 | 0.0010180 | 0.0012575 | 0.0012575 |
| 10  | Adelaide River        | Indonesia             | 0.0002343 | 0.0008067 | 0.0000599 | 0.0001796 | 0.0008982 | 0.0013174 | 0.0013174 |
| 82  | Clarence River        | Indonesia             | 0.0004316 | 0.0008060 | 0.0005389 | 0.0005464 | 0.0008383 | 0.0010778 | 0.0010778 |
| 125 | Daly River            | Indonesia             | 0.0002812 | 0.0008056 | 0.0002395 | 0.0003593 | 0.0008383 | 0.0012575 | 0.0012575 |
| 336 | Sydney Harbour        | Wenlock River         | 0.0002061 | 0.0008034 | 0.0002395 | 0.0005479 | 0.0007784 | 0.0011377 | 0.0012575 |
| 135 | Daly River            | Sydney Harbour        | 0.0002082 | 0.0008000 | 0.0004192 | 0.0004251 | 0.0007784 | 0.0012575 | 0.0013772 |
| 145 | East Alligator River  | Indonesia             | 0.0003186 | 0.0007966 | 0.0001198 | 0.0002395 | 0.0008982 | 0.0010464 | 0.0011377 |
| 231 | Indonesia             | Wenlock River         | 0.0002663 | 0.0007963 | 0.0002994 | 0.0004087 | 0.0008982 | 0.0010284 | 0.0010778 |
| 24  | Adelaide River        | Urauchi River         | 0.0003959 | 0.0007962 | 0.0002994 | 0.0002994 | 0.0008383 | 0.0012575 | 0.0014970 |
| 84  | Clarence River        | Papua New Guinea      | 0.0003227 | 0.0007889 | 0.0001198 | 0.0002395 | 0.0008383 | 0.0010778 | 0.0012575 |
| 20  | Adelaide River        | Sydney Harbour        | 0.0001480 | 0.0007879 | 0.0001198 | 0.0004192 | 0.0007186 | 0.0012081 | 0.0014371 |
| 147 | East Alligator River  | Papua New Guinea      | 0.0002163 | 0.0007862 | 0.0001796 | 0.0002395 | 0.0007784 | 0.0011976 | 0.0012575 |
| 12  | Adelaide River        | Papua New Guinea      | 0.0001208 | 0.0007851 | 0.0001796 | 0.0002395 | 0.0007784 | 0.0012740 | 0.0014970 |

Table 55: Nucleotide divergence between each Location (continued)

|     | strata.1              | strata.2              | dA         | mean      | q.0       | q.0.025   | q.0.5     | q.0.975   | q.1       |
|-----|-----------------------|-----------------------|------------|-----------|-----------|-----------|-----------|-----------|-----------|
| 177 | Fiji                  | Trinity inlet         | 0.0000915  | 0.0007784 | 0.0001796 | 0.0001796 | 0.0002395 | 0.0052695 | 0.0052695 |
| 155 | East Alligator River  | Sydney Harbour        | 0.0002243  | 0.0007698 | 0.0003593 | 0.0004192 | 0.0007186 | 0.0011377 | 0.0013174 |
| 257 | Papua New Guinea      | Trinity inlet         | 0.0004511  | 0.0007665 | 0.0005988 | 0.0005988 | 0.0007784 | 0.0009581 | 0.0009581 |
| 159 | East Alligator River  | Urauchi River         | 0.0004507  | 0.0007565 | 0.0002994 | 0.0002994 | 0.0008383 | 0.0011377 | 0.0011976 |
| 139 | Daly River            | Urauchi River         | 0.0003991  | 0.0007512 | 0.0002994 | 0.0002994 | 0.0007784 | 0.0011976 | 0.0014371 |
| 259 | Papua New Guinea      | Victoria River        | 0.0002109  | 0.0007484 | 0.0001796 | 0.0002395 | 0.0006587 | 0.0011467 | 0.0014371 |
| 262 | Reunion               | Seychelles            | 0.0004528  | 0.0007473 | 0.0000000 | 0.0000000 | 0.0008982 | 0.0010180 | 0.0010778 |
| 3   | Adelaide River        | Clarence River        | 0.0002448  | 0.0007445 | 0.0000000 | 0.0001198 | 0.0007186 | 0.0011377 | 0.0013174 |
| 350 | Urauchi River         | Wenlock River         | 0.0003857  | 0.0007435 | 0.0003593 | 0.0003593 | 0.0008383 | 0.0011377 | 0.0011976 |
| 335 | Sydney Harbour        | Victoria River        | 0.0002281  | 0.0007412 | 0.0000599 | 0.0005269 | 0.0006587 | 0.0011377 | 0.0013772 |
| 332 | Sydney Harbour        | Towns River           | 0.0003802  | 0.0007370 | 0.0005988 | 0.0005988 | 0.0007186 | 0.0010778 | 0.0010778 |
| 256 | Papua New Guinea      | Towns River           | 0.0003533  | 0.0007345 | 0.0002395 | 0.0002994 | 0.0007186 | 0.0011377 | 0.0011377 |
| 346 | Trinity inlet         | Urauchi River         | 0.0006786  | 0.0007300 | 0.0007186 | 0.0007186 | 0.0007186 | 0.0009581 | 0.0009581 |
| 69  | Blue mud Bay          | Sydney Harbour        | 0.0003846  | 0.0007278 | 0.0005389 | 0.0005988 | 0.0007186 | 0.0010778 | 0.0010778 |
| 77  | Clarence River        | Daly River            | 0.0002697  | 0.0007213 | 0.0000000 | 0.0001796 | 0.0007186 | 0.0010778 | 0.0012575 |
| 61  | Blue mud Bay          | Papua New Guinea      | 0.0003534  | 0.0007210 | 0.0001796 | 0.0002994 | 0.0007186 | 0.0011377 | 0.0011377 |
| 317 | South Alligator River | Sydney Harbour        | 0.0003244  | 0.0007195 | 0.0002994 | 0.0005389 | 0.0006587 | 0.0010778 | 0.0013174 |
| 23  | Adelaide River        | Trinity inlet         | 0.0003697  | 0.0007186 | 0.0004192 | 0.0004192 | 0.0006587 | 0.0010180 | 0.0010180 |
| 228 | Indonesia             | Trinity inlet         | 0.0004950  | 0.0007186 | 0.0005389 | 0.0005389 | 0.0007784 | 0.0007784 | 0.0007784 |
| 252 | Papua New Guinea      | South Alligator River | 0.0002978  | 0.0007173 | 0.0001796 | 0.0002395 | 0.0007186 | 0.0011377 | 0.0012575 |
| 279 | Roper River           | Sydney Harbour        | 0.0003600  | 0.0007059 | 0.0005389 | 0.0005389 | 0.0006587 | 0.0010614 | 0.0010778 |
| 248 | Papua New Guinea      | Roper River           | 0.0003313  | 0.0007016 | 0.0001796 | 0.0002680 | 0.0007186 | 0.0011093 | 0.0011377 |
| 98  | Clarence River        | Wenlock River         | 0.0002388  | 0.0006961 | 0.0000000 | 0.0001198 | 0.0007186 | 0.0010180 | 0.0010778 |
| 138 | Daly River            | Trinity inlet         | 0.0003890  | 0.0006898 | 0.0004192 | 0.0004192 | 0.0006587 | 0.0009581 | 0.0009581 |
| 254 | Papua New Guinea      | Sydney Harbour        | 0.0000803  | 0.0006866 | 0.0001198 | 0.0001198 | 0.0007784 | 0.0012575 | 0.0014371 |
| 78  | Clarence River        | East Alligator River  | 0.0002733  | 0.0006786 | 0.0000000 | 0.0001796 | 0.0007186 | 0.0010180 | 0.0011377 |
| 26  | Adelaide River        | Wenlock River         | 0.0000118  | 0.0006671 | 0.0000000 | 0.0000000 | 0.0007784 | 0.0012575 | 0.0013174 |
| 97  | Clarence River        | Victoria River        | 0.0002936  | 0.0006666 | 0.0000000 | 0.0001198 | 0.0006587 | 0.0010180 | 0.0012575 |
| 5   | Adelaide River        | Daly River            | 0.0000156  | 0.0006653 | 0.0000000 | 0.0000000 | 0.0007186 | 0.0013772 | 0.0014371 |
| 348 | Trinity inlet         | Wenlock River         | 0.0003554  | 0.0006618 | 0.0002395 | 0.0002395 | 0.0006587 | 0.0007784 | 0.0007784 |
| 347 | Trinity inlet         | Victoria River        | 0.0004366  | 0.0006587 | 0.0005389 | 0.0005389 | 0.0005988 | 0.0009581 | 0.0009581 |
| 158 | East Alligator River  | Trinity inlet         | 0.0004007  | 0.0006552 | 0.0004192 | 0.0004192 | 0.0006587 | 0.0008383 | 0.0008383 |
| 342 | Towns River           | Trinity inlet         | 0.0005808  | 0.0006467 | 0.0005988 | 0.0005988 | 0.0006587 | 0.0006587 | 0.0006587 |
| 244 | Okinawa               | Urauchi River         | 0.0002977  | 0.0006364 | 0.0000000 | 0.0000000 | 0.0010778 | 0.0010778 | 0.0010778 |
| 72  | Blue mud Bay          | Trinity inlet         | 0.0005834  | 0.0006357 | 0.0005389 | 0.0005389 | 0.0006587 | 0.0006587 | 0.0006587 |
| 94  | Clarence River        | Towns River           | 0.0004186  | 0.0006353 | 0.0000000 | 0.0001198 | 0.0007186 | 0.0009222 | 0.0009581 |
| 141 | Daly River            | Wenlock River         | 0.0000181  | 0.0006253 | 0.0000000 | 0.0000599 | 0.0006587 | 0.0011377 | 0.0012575 |
| 320 | South Alligator River | Trinity inlet         | 0.0005198  | 0.0006240 | 0.0005389 | 0.0005389 | 0.0005988 | 0.0007455 | 0.0008383 |
| 52  | Blue mud Bay          | Clarence River        | 0.0004190  | 0.0006221 | 0.0000000 | 0.0000599 | 0.0006587 | 0.0009581 | 0.0009581 |
| 6   | Adelaide River        | East Alligator River  | 0.0000179  | 0.0006213 | 0.0000000 | 0.0000000 | 0.0006587 | 0.0012799 | 0.0013772 |
| 90  | Clarence River        | South Alligator River | 0.0003648  | 0.0006198 | 0.0000000 | 0.0001198 | 0.0006587 | 0.0008982 | 0.0011377 |
| 282 | Roper River           | Trinity inlet         | 0.0005589  | 0.0006138 | 0.0005389 | 0.0005389 | 0.0006587 | 0.0006587 | 0.0006587 |
| 86  | Clarence River        | Roper River           | 0.0003995  | 0.0006052 | 0.0000000 | 0.0000644 | 0.0006587 | 0.0008937 | 0.0009581 |
| 25  | Adelaide River        | Victoria River        | 0.0000216  | 0.0005926 | 0.0000000 | 0.0000000 | 0.0007186 | 0.0013174 | 0.0013772 |
| 161 | East Alligator River  | Wenlock River         | 0.0000260  | 0.0005869 | 0.0000000 | 0.0000629 | 0.0005988 | 0.0010180 | 0.0010778 |
| 229 | Indonesia             | Urauchi River         | 0.0003116  | 0.0005864 | 0.0004192 | 0.0004192 | 0.0005389 | 0.0011377 | 0.0012575 |
| 351 | Victoria River        | Wenlock River         | 0.0000386  | 0.0005671 | 0.0000000 | 0.0000599 | 0.0007186 | 0.0010778 | 0.0012575 |
| 22  | Adelaide River        | Towns River           | 0.0001521  | 0.0005669 | 0.0000000 | 0.0000000 | 0.0006587 | 0.0010778 | 0.0010778 |
| 140 | Daly River            | Victoria River        | 0.0000365  | 0.0005595 | 0.0000000 | 0.0000000 | 0.0005988 | 0.0011976 | 0.0013772 |
| 121 | Daly River            | East Alligator River  | 0.0000035  | 0.0005588 | 0.0000000 | 0.0000000 | 0.0005389 | 0.0011377 | 0.0013174 |
| 18  | Adelaide River        | South Alligator River | 0.0000964  | 0.0005495 | 0.0000000 | 0.0000000 | 0.0006587 | 0.0010778 | 0.0013772 |
| 2   | Adelaide River        | Blue mud Bay          | 0.0001450  | 0.0005461 | 0.0000000 | 0.0000599 | 0.0006287 | 0.0010778 | 0.0010778 |
| 14  | Adelaide River        | Roper River           | 0.0001351  | 0.0005389 | 0.0000000 | 0.0000000 | 0.0006287 | 0.0010314 | 0.0010778 |
| 137 | Daly River            | Towns River           | 0.0001679  | 0.0005346 | 0.0000000 | 0.0000599 | 0.0004192 | 0.0010778 | 0.0010778 |
| 92  | Clarence River        | Sydney Harbour        | 0.0000899  | 0.0005317 | 0.0000000 | 0.0000000 | 0.0006587 | 0.0010778 | 0.0011976 |
| 54  | Blue mud Bay          | Daly River            | 0.0001692  | 0.0005222 | 0.0000000 | 0.0000599 | 0.0004192 | 0.0010778 | 0.0010778 |
| 345 | Towns River           | Wenlock River         | 0.0001484  | 0.0005206 | 0.0000000 | 0.0000599 | 0.0002994 | 0.0009581 | 0.0009581 |
| 323 | South Alligator River | Wenlock River         | 0.0000982  | 0.0005087 | 0.0000000 | 0.0000000 | 0.0003593 | 0.0009581 | 0.0010778 |
| 129 | Daly River            | Roper River           | 0.0001467  | 0.0005024 | 0.0000000 | 0.0000000 | 0.0003892 | 0.0010778 | 0.0010778 |
| 133 | Daly River            | South Alligator River | 0.0000915  | 0.0004964 | 0.0000000 | 0.0000000 | 0.0004192 | 0.0010778 | 0.0013174 |
| 285 | Roper River           | Wenlock River         | 0.0001343  | 0.0004956 | 0.0000000 | 0.0000524 | 0.0002994 | 0.0009581 | 0.0009581 |
| 75  | Blue mud Bay          | Wenlock River         | 0.0001326  | 0.0004912 | 0.0000000 | 0.0000000 | 0.0002994 | 0.0009581 | 0.0009581 |
| 160 | East Alligator River  | Victoria River        | 0.0000142  | 0.0004908 | 0.0000000 | 0.0000599 | 0.0002994 | 0.0010778 | 0.0013174 |
| 333 | Sydney Harbour        | Trinity inlet         | 0.0001604  | 0.0004514 | 0.0000000 | 0.0000000 | 0.0005988 | 0.0009581 | 0.0009581 |
| 157 | East Alligator River  | Towns River           | 0.0001122  | 0.0004325 | 0.0000000 | 0.0000659 | 0.0002994 | 0.0010180 | 0.0010180 |
| 55  | Blue mud Bay          | East Alligator River  | 0.0001127  | 0.0004194 | 0.0000000 | 0.0000599 | 0.0002994 | 0.0010180 | 0.0010180 |
| 153 | East Alligator River  | South Alligator River | 0.0000469  | 0.0004055 | 0.0000000 | 0.0000000 | 0.0002395 | 0.0010180 | 0.0010778 |
| 149 | East Alligator River  | Roper River           | 0.0000913  | 0.0004007 | 0.0000000 | 0.0000404 | 0.0002395 | 0.0010180 | 0.0010180 |
| 344 | Towns River           | Victoria River        | 0.0000559  | 0.0003439 | 0.0000000 | 0.0000000 | 0.0001796 | 0.0010180 | 0.0010180 |
| 322 | South Alligator River | Victoria River        | 0.0000103  | 0.0003366 | 0.0000000 | 0.0000000 | 0.0001198 | 0.0010180 | 0.0013174 |
| 74  | Blue mud Bay          | Victoria River        | 0.0000536  | 0.0003279 | 0.0000000 | 0.0000599 | 0.0001796 | 0.0010180 | 0.0010180 |
| 284 | Roper River           | Victoria River        | 0.0000388  | 0.0003158 | 0.0000000 | 0.0000000 | 0.0001796 | 0.0010180 | 0.0010180 |
| 103 | Costa Rica            | Gulf of California    | 0.0001728  | 0.0003074 | 0.0002395 | 0.0002395 | 0.0002994 | 0.0004192 | 0.0004192 |
| 319 | South Alligator River | Towns River           | 0.0000417  | 0.0002118 | 0.0000000 | 0.0000000 | 0.0001796 | 0.0008278 | 0.0010180 |
| 67  | Blue mud Bay          | South Alligator River | 0.0000342  | 0.0001906 | 0.0000000 | 0.0000000 | 0.0001796 | 0.0008593 | 0.0010180 |
| 277 | Roper River           | South Alligator River | 0.0000245  | 0.0001836 | 0.0000000 | 0.0000000 | 0.0001796 | 0.0008054 | 0.0010180 |
| 71  | Blue mud Bay          | Towns River           | 0.0000533  | 0.0001713 | 0.0000000 | 0.0000599 | 0.0001796 | 0.0002395 | 0.0002395 |
| 95  | Clarence River        | Trinity inlet         | 0.0000202  | 0.0001711 | 0.0000000 | 0.0000000 | 0.0000599 | 0.0007784 | 0.0007784 |
| 63  | Blue mud Bay          | Roper River           | 0.0000438  | 0.0001509 | 0.0000000 | 0.0000165 | 0.0001198 | 0.0002395 | 0.0002395 |
| 281 | Roper River           | Towns River           | -0.0000220 | 0.0000988 | 0.0000000 | 0.0000000 | 0.0001198 | 0.0002395 | 0.0002395 |

Table 53: Nucleotide and haplotype diversity per Location

|     | Location              | pi.strataG | pi.pegas | pi.pegas.var | HT.richness.strataG | h.pegas  | h.pegas.var |
|-----|-----------------------|------------|----------|--------------|---------------------|----------|-------------|
| 1   | Gulf of California    | NaN        | NaN      | NaN          | 1                   | NaN      | NaN         |
| 11  | Costa Rica            | 0.000269   | 0.000269 | 0e+00        | 9                   | 0.914286 | 0.002208    |
| 12  | Sierra Leone          | NaN        | NaN      | NaN          | 1                   | NaN      | NaN         |
| 13  | South Africa          | NaN        | 0.001950 | 1e-06        | 6                   | 0.952381 | 0.005950    |
| 14  | Reunion               | 0.000289   | 0.000289 | 0e+00        | 6                   | 0.808333 | 0.004289    |
| 15  | Seychelles            | 0.000299   | 0.000299 | 0e+00        | 3                   | 0.660131 | 0.002867    |
| 16  | Arabian Sea           | 0.001792   | 0.001792 | 1e-06        | 13                  | 0.941520 | 0.001170    |
| 17  | Sri Lanka             | 0.003036   | 0.003037 | 3e-06        | 11                  | 0.984848 | 0.000986    |
| 18  | Thailand              | NaN        | 0.002925 | 3e-06        | 4                   | 0.800000 | 0.025926    |
| 19  | Indonesia             | 0.000447   | 0.000447 | 0e+00        | 6                   | 1.000000 | 0.004630    |
| 110 | Papua New Guinea      | 0.000630   | 0.000631 | 0e+00        | 13                  | 0.980952 | 0.000600    |
| 111 | Fitzroy River         | 0.003148   | 0.003149 | 4e-06        | 4                   | 0.900000 | 0.017760    |
| 112 | Victoria River        | 0.000444   | 0.000444 | 0e+00        | 14                  | 0.933333 | 0.001401    |
| 113 | Daly River            | 0.000601   | 0.000601 | 0e+00        | 16                  | 0.936667 | 0.001178    |
| 114 | Adelaide River        | 0.000697   | 0.000698 | 0e+00        | 12                  | 0.921569 | 0.002350    |
| 115 | South Alligator River | 0.000208   | 0.000208 | 0e+00        | 18                  | 0.934566 | 0.000394    |
| 116 | East Alligator River  | 0.000509   | 0.000509 | 0e+00        | 12                  | 0.941176 | 0.001566    |
| 117 | Blue mud Bay          | 0.000104   | 0.000104 | 0e+00        | 7                   | 0.871795 | 0.003701    |
| 118 | Roper River           | 0.000110   | 0.000110 | 0e+00        | 3                   | 0.833333 | 0.035156    |
| 119 | Towns River           | NaN        | 0.000132 | 0e+00        | 3                   | 0.700000 | 0.043040    |
| 120 | Wenlock River         | 0.000612   | 0.000613 | 0e+00        | 14                  | 0.964912 | 0.000549    |
| 121 | Trinity inlet         | 0.000000   | 0.000000 | 0e+00        | 2                   | 0.500000 | 0.066406    |
| 122 | Clarence River        | 0.000302   | 0.000302 | 0e+00        | 12                  | 0.933333 | 0.000784    |
| 123 | Sydney Harbour        | 0.000582   | 0.000582 | 0e+00        | 11                  | 0.974359 | 0.000968    |
| 124 | Okinawa               | 0.000575   | 0.000575 | 0e+00        | 3                   | 0.711111 | 0.005120    |
| 125 | Urauchi River         | 0.000103   | 0.000103 | 0e+00        | 3                   | 0.528571 | 0.005884    |
| 126 | Fiji                  | NaN        | 0.001374 | 1e-06        | 8                   | 0.972222 | 0.002578    |

Table 54: Nucleotide divergence within each Location

|    | stratum               | mean     | q.0 | q.0.025 | q.0.5    | q.0.975  | q.1      |
|----|-----------------------|----------|-----|---------|----------|----------|----------|
| 9  | Fitzroy River         | 0.003150 | 0   | 0.0e+00 | 0.005210 | 0.005269 | 0.005269 |
| 20 | Sri Lanka             | 0.003038 | 0   | 3.7e-05 | 0.005210 | 0.005569 | 0.005629 |
| 22 | Thailand              | 0.002926 | 0   | 0.0e+00 | 0.005269 | 0.005428 | 0.005449 |
| 18 | South Africa          | 0.001950 | 0   | 6.0e-05 | 0.001138 | 0.005150 | 0.005150 |
| 2  | Arabian Sea           | 0.001793 | 0   | 0.0e+00 | 0.000240 | 0.006048 | 0.006108 |
| 8  | Fiji                  | 0.001374 | 0   | 0.0e+00 | 0.000240 | 0.005509 | 0.005509 |
| 1  | Adelaide River        | 0.000698 | 0   | 0.0e+00 | 0.000778 | 0.001377 | 0.001437 |
| 13 | Papua New Guinea      | 0.000631 | 0   | 0.0e+00 | 0.000778 | 0.001257 | 0.001377 |
| 27 | Wenlock River         | 0.000613 | 0   | 0.0e+00 | 0.000838 | 0.001018 | 0.001018 |
| 6  | Daly River            | 0.000602 | 0   | 0.0e+00 | 0.000599 | 0.001257 | 0.001377 |
| 21 | Sydney Harbour        | 0.000582 | 0   | 0.0e+00 | 0.000778 | 0.001082 | 0.001257 |
| 12 | Okinawa               | 0.000575 | 0   | 0.0e+00 | 0.001078 | 0.001078 | 0.001078 |
| 7  | East Alligator River  | 0.000509 | 0   | 0.0e+00 | 0.000449 | 0.001078 | 0.001078 |
| 11 | Indonesia             | 0.000447 | 0   | 0.0e+00 | 0.000240 | 0.001078 | 0.001078 |
| 26 | Victoria River        | 0.000444 | 0   | 0.0e+00 | 0.000180 | 0.001018 | 0.001317 |
| 4  | Clarence River        | 0.000302 | 0   | 0.0e+00 | 0.000120 | 0.000838 | 0.001078 |
| 16 | Seychelles            | 0.000299 | 0   | 0.0e+00 | 0.000000 | 0.001018 | 0.001018 |
| 14 | Reunion               | 0.000289 | 0   | 0.0e+00 | 0.000120 | 0.001078 | 0.001078 |
| 5  | Costa Rica            | 0.000269 | 0   | 0.0e+00 | 0.000299 | 0.000419 | 0.000419 |
| 19 | South Alligator River | 0.000208 | 0   | 0.0e+00 | 0.000180 | 0.000958 | 0.001078 |
| 23 | Towns River           | 0.000132 | 0   | 0.0e+00 | 0.000180 | 0.000240 | 0.000240 |
| 15 | Roper River           | 0.000110 | 0   | 7.0e-06 | 0.000120 | 0.000180 | 0.000180 |
| 3  | Blue mud Bay          | 0.000104 | 0   | 0.0e+00 | 0.000120 | 0.000240 | 0.000240 |
| 25 | Urauchi River         | 0.000103 | 0   | 0.0e+00 | 0.000000 | 0.001078 | 0.001078 |
| 24 | Trinity inlet         | 0.000000 | 0   | 0.0e+00 | 0.000000 | 0.000000 | 0.000000 |
| 10 | Gulf of California    | NA       | NA  | NA      | NA       | NA       | NA       |
| 17 | Sierra Leone          | NA       | NA  | NA      | NA       | NA       | NA       |

Table 56: Haplotype counts per Location according to pegas

|      | GOC | COR | SIL | SAF | RUN | SEY | ARS | SRL | TAI | IND | PNG | FZR | VIR | DAR | ADR | SAR | EAR | BMB | ROR | TOR | WER | TRI | CLR | SYH | URR | OKI | FIJ |
|------|-----|-----|-----|-----|-----|-----|-----|-----|-----|-----|-----|-----|-----|-----|-----|-----|-----|-----|-----|-----|-----|-----|-----|-----|-----|-----|-----|
| HT01 | 0   | 0   | 0   | 1   | 0   | 0   | 0   | 0   | 0   | 0   | 0   | 0   | 0   | 0   | 0   | 0   | 0   | 0   | 0   | 0   | 0   | 0   | 0   | 0   | 0   | 0   | 0   |
| HT02 | 0   | 0   | 0   | 1   | 0   | 0   | 0   | 0   | 0   | 0   | 0   | 0   | 0   | 0   | 0   | 0   | 0   | 0   | 0   | 0   | 0   | 0   | 0   | 0   | 0   | 0   | 0   |
| HT03 | 0   | 0   | 0   | 1   | 0   | 0   | 0   | 0   | 0   | 0   | 0   | 0   | 0   | 0   | 0   | 0   | 0   | 0   | 0   | 0   | 0   | 0   | 0   | 0   | 0   | 0   | 0   |
| HT04 | 0   | 0   | 0   | 0   | 1   | 0   | 0   | 0   | 0   | 0   | 0   | 0   | 0   | 0   | 0   | 0   | 0   | 0   | 0   | 0   | 0   | 0   | 0   | 0   | 0   | 0   | 0   |
| HT05 | 0   | 0   | 0   | 0   | 0   | 0   | 0   | 0   | 3   | 0   | 0   | 0   | 0   | 0   | 0   | 0   | 0   | 0   | 0   | 0   | 0   | 0   | 0   | 0   | 0   | 0   | 0   |
| HT06 | 0   | 0   | 0   | 0   | 0   | 0   | 0   | 2   | 0   | 0   | 0   | 0   | 0   | 0   | 0   | 0   | 0   | 0   | 0   | 0   | 0   | 0   | 0   | 0   | 0   | 0   | 0   |
| HT07 | 0   | 0   | 0   | 0   | 0   | 0   | 0   | 1   | 0   | 0   | 0   | 0   | 0   | 0   | 0   | 0   | 0   | 0   | 0   | 0   | 0   | 0   | 0   | 0   | 0   | 0   | 0   |
| HT08 | 0   | 0   | 0   | 0   | 1   | 0   | 0   | 0   | 0   | 0   | 0   | 0   | 0   | 0   | 0   | 0   | 0   | 0   | 0   | 0   | 0   | 0   | 0   | 0   | 0   | 0   | 0   |
| HT09 | 0   | 0   | 0   | 1   | 0   | 0   | 0   | 0   | 0   | 0   | 0   | 0   | 0   | 0   | 0   | 0   | 0   | 0   | 0   | 0   | 0   | 0   | 0   | 0   | 0   | 0   | 0   |
| HT10 | 0   | 0   | 0   | 2   | 0   | 8   | 0   | 0   | 0   | 0   | 0   | 0   | 0   | 0   | 0   | 0   | 0   | 0   | 0   | 0   | 0   | 0   | 0   | 0   | 0   | 0   | 0   |
| HT11 | 0   | 0   | 0   | 0   | 0   | 7   | 0   | 0   | 0   | 0   | 0   | 0   | 0   | 0   | 0   | 0   | 0   | 0   | 0   | 0   | 0   | 0   | 0   | 0   | 0   | 0   | 0   |
| HT12 | 0   | 0   | 0   | 0   | 0   | 0   | 0   | 0   | 0   | 0   | 0   | 2   | 0   | 0   | 0   | 0   | 0   | 0   | 0   | 0   | 0   | 0   | 0   | 0   | 0   | 0   | 0   |
| HT13 | 0   | 0   | 0   | 0   | 0   | 0   | 0   | 1   | 0   | 0   | 0   | 0   | 0   | 0   | 0   | 0   | 0   | 0   | 0   | 0   | 0   | 0   | 0   | 0   | 0   | 0   | 0   |
| HT14 | 0   | 0   | 0   | 0   | 0   | 0   | 0   | 1   | 0   | 0   | 0   | 0   | 0   | 0   | 0   | 0   | 0   | 0   | 0   | 0   | 0   | 0   | 0   | 0   | 0   | 0   | 0   |
| HT15 | 0   | 0   | 0   | 0   | 0   | 6   | 0   | 0   | 0   | 0   | 0   | 0   | 0   | 0   | 0   | 0   | 0   | 0   | 0   | 0   | 0   | 0   | 0   | 0   | 0   | 0   | 0   |
| HT16 | 0   | 0   | 0   | 0   | 2   | 3   | 0   | 0   | 0   | 0   | 0   | 0   | 0   | 0   | 0   | 0   | 0   | 0   | 0   | 0   | 0   | 0   | 0   | 0   | 0   | 0   | 0   |
| HT17 | 0   | 0   | 0   | 0   | 2   | 0   | 0   | 0   | 0   | 0   | 0   | 0   | 0   | 0   | 0   | 0   | 0   | 0   | 0   | 0   | 0   | 0   | 0   | 0   | 0   | 0   | 0   |
| HT18 | 0   | 0   | 0   | 0   | 4   | 0   | 0   | 0   | 0   | 0   | 0   | 0   | 0   | 0   | 0   | 0   | 0   | 0   | 0   | 0   | 0   | 0   | 0   | 0   | 0   | 0   | 0   |
| HT19 | 0   | 0   | 0   | 0   | 0   | 0   | 0   | 0   | 0   | 0   | 0   | 0   | 0   | 0   | 0   | 0   | 0   | 0   | 0   | 0   | 0   | 0   | 0   | 0   | 0   | 0   | 1   |
| HT20 | 0   | 0   | 0   | 0   | 0   | 0   | 0   | 1   | 0   | 0   | 0   | 0   | 0   | 0   | 0   | 0   | 0   | 0   | 0   | 0   | 0   | 0   | 0   | 0   | 0   | 0   | 0   |
| HT21 | 0   | 0   | 0   | 0   | 0   | 0   | 0   | 1   | 1   | 0   | 0   | 0   | 0   | 0   | 0   | 0   | 0   | 0   | 0   | 0   | 0   | 0   | 0   | 0   | 0   | 0   | 0   |
| HT22 | 0   | 0   | 0   | 0   | 0   | 0   | 3   | 0   | 0   | 0   | 0   | 0   | 0   | 0   | 0   | 0   | 0   | 0   | 0   | 0   | 0   | 0   | 0   | 0   | 0   | 0   | 0   |
| HT23 | 0   | 0   | 0   | 0   | 0   | 0   | 0   | 0   | 0   | 0   | 0   | 0   | 0   | 0   | 0   | 0   | 0   | 0   | 0   | 0   | 0   | 0   | 1   | 0   | 2   | 0   | 0   |
| HT24 | 0   | 0   | 0   | 0   | 0   | 0   | 0   | 0   | 0   | 0   | 0   | 0   | 0   | 0   | 0   | 0   | 0   | 0   | 0   | 0   | 0   | 0   | 3   | 0   | 1   | 0   | 0   |
| HT25 | 0   | 0   | 0   | 0   | 0   | 0   | 0   | 0   | 0   | 0   | 0   | 0   | 0   | 1   | 0   | 0   | 0   | 0   | 0   | 0   | 0   | 0   | 0   | 0   | 0   | 0   | 0   |
| HT26 | 0   | 0   | 0   | 0   | 0   | 0   | 0   | 0   | 0   | 0   | 0   | 0   | 0   | 0   | 0   | 0   | 0   | 0   | 0   | 0   | 0   | 0   | 0   | 1   | 0   | 0   | 0   |
| HT27 | 0   | 0   | 0   | 0   | 0   | 0   | 0   | 0   | 0   | 0   | 0   | 0   | 0   | 0   | 0   | 0   | 0   | 0   | 0   | 0   | 0   | 1   | 0   | 0   | 0   | 0   | 0   |
| HT28 | 0   | 0   | 0   | 0   | 0   | 0   | 0   | 0   | 0   | 1   | 0   | 0   | 0   | 0   | 0   | 0   | 0   | 0   | 0   | 0   | 0   | 0   | 0   | 0   | 0   | 0   | 0   |
| HT29 | 0   | 0   | 0   | 0   | 0   | 0   | 0   | 0   | 0   | 0   | 0   | 0   | 0   | 0   | 0   | 2   | 0   | 0   | 0   | 0   | 0   | 0   | 0   | 0   | 0   | 0   | 0   |
| HT30 | 0   | 0   | 0   | 0   | 0   | 0   | 0   | 0   | 0   | 0   | 0   | 0   | 0   | 0   | 0   | 1   | 4   | 0   | 0   | 0   | 0   | 0   | 0   | 0   | 0   | 0   | 0   |
| HT31 | 0   | 0   | 0   | 0   | 0   | 0   | 0   | 0   | 0   | 0   | 0   | 0   | 0   | 0   | 2   | 1   | 0   | 0   | 0   | 0   | 0   | 0   | 0   | 0   | 0   | 0   | 0   |
| HT32 | 0   | 0   | 0   | 0   | 0   | 0   | 0   | 0   | 0   | 0   | 1   | 0   | 0   | 0   | 0   | 0   | 0   | 0   | 0   | 0   | 0   | 0   | 0   | 0   | 0   | 0   | 0   |
| HT33 | 0   | 0   | 0   | 0   | 0   | 0   | 0   | 0   | 0   | 0   | 0   | 0   | 1   | 0   | 0   | 0   | 0   | 0   | 0   | 0   | 0   | 0   | 0   | 0   | 0   | 0   | 0   |
| HT34 | 0   | 0   | 0   | 0   | 0   | 0   | 0   | 0   | 0   | 0   | 0   | 1   | 5   | 0   | 0   | 1   | 0   | 0   | 0   | 0   | 0   | 0   | 0   | 0   | 0   | 0   | 0   |
| HT35 | 0   | 0   | 0   | 0   | 0   | 0   | 0   | 0   | 0   | 0   | 0   | 0   | 1   | 0   | 0   | 0   | 0   | 0   | 0   | 0   | 0   | 0   | 0   | 0   | 0   | 0   | 0   |
| HT36 | 0   | 0   | 0   | 0   | 0   | 0   | 0   | 0   | 0   | 0   | 0   | 0   | 0   | 0   | 0   | 0   | 0   | 0   | 0   | 0   | 3   | 0   | 0   | 0   | 0   | 0   | 0   |
| HT37 | 0   | 0   | 0   | 0   | 0   | 0   | 0   | 0   | 0   | 0   | 0   | 0   | 0   | 0   | 0   | 0   | 0   | 0   | 2   | 0   | 0   | 0   | 0   | 0   | 0   | 0   | 0   |
| HT38 | 0   | 0   | 0   | 0   | 0   | 0   | 0   | 0   | 0   | 0   | 0   | 0   | 0   | 0   | 0   | 1   | 1   | 0   | 0   | 0   | 0   | 0   | 0   | 0   | 0   | 0   | 0   |
| HT39 | 0   | 0   | 0   | 0   | 0   | 0   | 0   | 0   | 0   | 0   | 0   | 0   | 0   | 0   | 0   | 2   | 0   | 0   | 0   | 0   | 0   | 0   | 0   | 0   | 0   | 0   | 0   |
| HT40 | 0   | 0   | 0   | 0   | 0   | 0   | 0   | 0   | 0   | 0   | 0   | 0   | 1   | 0   | 0   | 0   | 1   | 0   | 0   | 0   | 0   | 0   | 0   | 0   | 0   | 0   | 0   |
| HT41 | 0   | 0   | 0   | 0   | 0   | 0   | 0   | 0   | 0   | 0   | 0   | 0   | 0   | 0   | 0   | 1   | 0   | 0   | 0   | 0   | 0   | 0   | 0   | 0   | 0   | 0   | 0   |
| HT42 | 0   | 0   | 0   | 0   | 0   | 0   | 0   | 0   | 0   | 0   | 0   | 0   | 0   | 0   | 0   | 1   | 0   | 0   | 0   | 0   | 0   | 0   | 0   | 0   | 0   | 0   | 0   |
| HT43 | 0   | 0   | 0   | 0   | 0   | 0   | 0   | 0   | 0   | 0   | 0   | 0   | 0   | 0   | 0   | 1   | 0   | 0   | 0   | 0   | 0   | 0   | 0   | 0   | 0   | 0   | 0   |
| HT44 | 0   | 0   | 0   | 0   | 0   | 0   | 0   | 0   | 0   | 0   | 0   | 1   | 0   | 2   | 0   | 0   | 0   | 1   | 1   | 0   | 0   | 0   | 0   | 0   | 0   | 0   | 0   |
| HT45 | 0   | 0   | 0   | 0   | 0   | 0   | 0   | 0   | 0   | 0   | 0   | 0   | 0   | 0   | 0   | 2   | 0   | 2   | 0   | 0   | 0   | 0   | 0   | 0   | 0   | 0   | 0   |
| HT46 | 0   | 0   | 0   | 0   | 0   | 0   | 0   | 0   | 0   | 0   | 0   | 1   | 2   | 2   | 0   | 3   | 1   | 0   | 0   | 0   | 0   | 0   | 0   | 0   | 0   | 0   | 0   |
| HT47 | 0   | 0   | 0   | 0   | 0   | 0   | 0   | 0   | 0   | 0   | 0   | 0   | 1   | 0   | 0   | 0   | 0   | 0   | 0   | 0   | 0   | 0   | 0   | 0   | 0   | 0   | 0   |
| HT48 | 0   | 0   | 0   | 0   | 0   | 0   | 0   | 0   | 0   | 0   | 0   | 0   | 0   | 0   | 1   | 0   | 0   | 0   | 0   | 0   | 0   | 0   | 0   | 0   | 0   | 0   | 0   |
| HT49 | 0   | 0   | 0   | 0   | 0   | 0   | 0   | 0   | 0   | 0   | 0   | 0   | 0   | 0   | 0   | 1   | 0   | 0   | 0   | 0   | 0   | 0   | 0   | 0   | 0   | 0   | 0   |
| HT50 | 0   | 0   | 0   | 0   | 0   | 0   | 0   | 0   | 0   | 0   | 0   | 0   | 0   | 6   | 0   | 4   | 2   | 0   | 0   | 0   | 0   | 0   | 0   | 0   | 0   | 0   | 0   |
| HT51 | 0   | 0   | 0   | 0   | 0   | 0   | 0   | 0   | 0   | 0   | 0   | 0   | 0   | 1   | 0   | 5   | 1   | 0   | 0   | 0   | 0   | 0   | 0   | 0   | 0   | 0   | 0   |
| HT52 | 0   | 0   | 0   | 0   | 0   | 0   | 0   | 0   | 0   | 0   | 0   | 0   | 0   | 1   | 0   | 0   | 0   | 0   | 0   | 0   | 0   | 0   | 0   | 0   | 0   | 0   | 0   |
| HT53 | 0   | 0   | 0   | 0   | 0   | 0   | 0   | 0   | 0   | 0   | 0   | 0   | 0   | 0   | 0   | 0   | 0   | 1   | 0   | 0   | 0   | 0   | 0   | 0   | 0   | 0   | 0   |

Table 56: Haplotype counts per Location according to pegas (continued)

|       | GOC | COR | SIL | SAF | RUN | SEY | ARS | SRL | TAI | IND | PNG | FZR | VIR | DAR | ADR | SAR | EAR | BMB | ROR | TOR | WER | TRI | CLR | SYH | URR | OKI | FIJ |
|-------|-----|-----|-----|-----|-----|-----|-----|-----|-----|-----|-----|-----|-----|-----|-----|-----|-----|-----|-----|-----|-----|-----|-----|-----|-----|-----|-----|
| HT54  | 0   | 0   | 0   | 0   | 0   | 0   | 0   | 0   | 0   | 0   | 0   | 0   | 0   | 0   | 0   | 0   | 0   | 0   | 0   | 0   | 1   | 0   | 0   | 0   | 0   | 0   | 0   |
| HT55  | 0   | 0   | 0   | 0   | 0   | 0   | 0   | 0   | 0   | 0   | 0   | 0   | 3   | 1   | 5   | 7   | 1   | 0   | 1   | 1   | 0   | 0   | 0   | 0   | 0   | 0   | 0   |
| HT56  | 0   | 0   | 0   | 0   | 0   | 0   | 0   | 0   | 0   | 0   | 0   | 0   | 1   | 0   | 0   | 3   | 0   | 1   | 0   | 0   | 2   | 0   | 1   | 0   | 0   | 0   | 0   |
| HT57  | 0   | 0   | 0   | 0   | 0   | 0   | 0   | 0   | 0   | 0   | 0   | 0   | 0   | 0   | 0   | 0   | 0   | 0   | 0   | 0   | 1   | 0   | 0   | 0   | 0   | 0   | 0   |
| HT58  | 0   | 0   | 0   | 0   | 0   | 0   | 0   | 0   | 0   | 0   | 0   | 0   | 0   | 0   | 0   | 0   | 0   | 0   | 0   | 0   | 1   | 0   | 0   | 0   | 0   | 0   | 0   |
| HT59  | 0   | 0   | 0   | 0   | 0   | 0   | 0   | 0   | 0   | 0   | 0   | 0   | 1   | 0   | 0   | 0   | 0   | 0   | 0   | 0   | 0   | 0   | 0   | 0   | 0   | 0   | 0   |
| HT60  | 0   | 0   | 0   | 0   | 0   | 0   | 0   | 0   | 0   | 0   | 0   | 0   | 0   | 0   | 0   | 0   | 0   | 0   | 0   | 0   | 2   | 0   | 0   | 0   | 0   | 0   | 0   |
| HT61  | 0   | 0   | 0   | 0   | 0   | 0   | 0   | 0   | 0   | 0   | 0   | 0   | 0   | 0   | 0   | 0   | 0   | 0   | 0   | 0   | 1   | 0   | 0   | 0   | 0   | 0   | 0   |
| HT62  | 0   | 0   | 0   | 0   | 0   | 0   | 0   | 0   | 0   | 0   | 0   | 0   | 0   | 0   | 0   | 0   | 0   | 0   | 0   | 0   | 1   | 0   | 0   | 0   | 0   | 0   | 0   |
| HT63  | 0   | 0   | 0   | 0   | 0   | 0   | 0   | 0   | 0   | 0   | 0   | 0   | 0   | 0   | 0   | 0   | 0   | 0   | 0   | 0   | 1   | 0   | 0   | 0   | 0   | 0   | 0   |
| HT64  | 0   | 0   | 0   | 0   | 0   | 0   | 1   | 0   | 0   | 0   | 0   | 0   | 0   | 0   | 0   | 0   | 0   | 0   | 0   | 0   | 0   | 0   | 0   | 0   | 0   | 0   | 0   |
| HT65  | 0   | 0   | 0   | 0   | 0   | 0   | 1   | 0   | 0   | 0   | 0   | 0   | 0   | 0   | 0   | 0   | 0   | 0   | 0   | 0   | 0   | 0   | 0   | 0   | 0   | 0   | 0   |
| HT66  | 0   | 0   | 0   | 0   | 0   | 0   | 0   | 0   | 0   | 0   | 0   | 0   | 0   | 0   | 0   | 0   | 0   | 0   | 0   | 0   | 1   | 0   | 0   | 0   | 0   | 0   | 0   |
| HT67  | 0   | 0   | 0   | 0   | 0   | 0   | 1   | 0   | 0   | 0   | 0   | 0   | 0   | 0   | 0   | 0   | 0   | 0   | 0   | 0   | 0   | 0   | 0   | 0   | 0   | 0   | 0   |
| HT68  | 0   | 0   | 0   | 0   | 0   | 0   | 0   | 0   | 0   | 0   | 0   | 0   | 0   | 0   | 0   | 0   | 0   | 0   | 0   | 0   | 3   | 0   | 0   | 0   | 0   | 0   | 0   |
| HT69  | 0   | 0   | 0   | 0   | 0   | 0   | 2   | 0   | 0   | 0   | 0   | 0   | 0   | 0   | 0   | 0   | 0   | 0   | 0   | 0   | 0   | 0   | 0   | 0   | 0   | 0   | 0   |
| HT70  | 0   | 0   | 0   | 0   | 0   | 0   | 1   | 0   | 0   | 0   | 0   | 0   | 0   | 0   | 0   | 0   | 0   | 0   | 0   | 0   | 0   | 0   | 0   | 0   | 0   | 0   | 0   |
| HT71  | 0   | 0   | 0   | 0   | 0   | 0   | 1   | 0   | 0   | 0   | 0   | 0   | 0   | 0   | 0   | 0   | 0   | 0   | 0   | 0   | 0   | 0   | 0   | 0   | 0   | 0   | 0   |
| HT72  | 0   | 0   | 0   | 0   | 0   | 0   | 1   | 0   | 0   | 0   | 0   | 0   | 0   | 0   | 0   | 0   | 0   | 0   | 0   | 0   | 0   | 0   | 0   | 0   | 0   | 0   | 0   |
| HT73  | 0   | 0   | 0   | 0   | 0   | 0   | 0   | 0   | 1   | 0   | 0   | 0   | 0   | 0   | 0   | 0   | 0   | 0   | 0   | 0   | 0   | 0   | 0   | 0   | 0   | 0   | 0   |
| HT74  | 0   | 0   | 0   | 0   | 0   | 0   | 0   | 0   | 0   | 0   | 1   | 0   | 0   | 0   | 0   | 0   | 0   | 0   | 0   | 0   | 0   | 0   | 0   | 0   | 0   | 0   | 0   |
| HT75  | 0   | 0   | 0   | 0   | 0   | 0   | 0   | 0   | 0   | 0   | 1   | 0   | 0   | 0   | 0   | 0   | 0   | 0   | 0   | 0   | 0   | 0   | 0   | 0   | 0   | 0   | 0   |
| HT76  | 0   | 0   | 0   | 0   | 0   | 0   | 0   | 0   | 0   | 0   | 0   | 0   | 0   | 1   | 0   | 0   | 0   | 0   | 0   | 0   | 0   | 0   | 0   | 0   | 0   | 0   | 0   |
| HT77  | 0   | 0   | 0   | 0   | 0   | 0   | 0   | 0   | 0   | 0   | 0   | 0   | 0   | 2   | 1   | 0   | 2   | 0   | 0   | 0   | 0   | 0   | 0   | 0   | 0   | 0   | 0   |
| HT78  | 0   | 0   | 0   | 0   | 0   | 0   | 1   | 0   | 0   | 0   | 0   | 0   | 0   | 0   | 0   | 0   | 0   | 0   | 0   | 0   | 0   | 0   | 0   | 0   | 0   | 0   | 0   |
| HT79  | 0   | 0   | 0   | 0   | 0   | 0   | 4   | 0   | 0   | 0   | 0   | 0   | 0   | 0   | 0   | 0   | 0   | 0   | 0   | 0   | 0   | 0   | 0   | 0   | 0   | 0   | 0   |
| HT80  | 0   | 0   | 0   | 0   | 0   | 0   | 1   | 0   | 0   | 0   | 0   | 0   | 0   | 0   | 0   | 0   | 0   | 0   | 0   | 0   | 0   | 0   | 0   | 0   | 0   | 0   | 0   |
| HT81  | 0   | 0   | 0   | 0   | 0   | 0   | 0   | 0   | 0   | 0   | 0   | 0   | 0   | 0   | 0   | 0   | 0   | 0   | 0   | 0   | 1   | 0   | 0   | 0   | 0   | 0   | 0   |
| HT82  | 0   | 0   | 0   | 0   | 0   | 0   | 0   | 0   | 0   | 0   | 0   | 0   | 0   | 0   | 0   | 0   | 0   | 0   | 0   | 0   | 1   | 0   | 0   | 0   | 0   | 0   | 0   |
| HT83  | 0   | 0   | 0   | 0   | 0   | 0   | 1   | 0   | 0   | 0   | 0   | 0   | 0   | 0   | 0   | 0   | 0   | 0   | 0   | 0   | 0   | 0   | 0   | 0   | 0   | 0   | 0   |
| HT84  | 0   | 0   | 0   | 0   | 0   | 0   | 0   | 0   | 0   | 0   | 0   | 0   | 0   | 0   | 0   | 0   | 0   | 0   | 0   | 0   | 0   | 0   | 1   | 0   | 0   | 0   | 0   |
| HT85  | 0   | 0   | 0   | 0   | 0   | 0   | 0   | 0   | 0   | 0   | 0   | 0   | 0   | 0   | 0   | 0   | 0   | 0   | 0   | 0   | 0   | 0   | 2   | 1   | 0   | 0   | 0   |
| HT86  | 0   | 0   | 0   | 0   | 0   | 0   | 0   | 0   | 0   | 0   | 0   | 0   | 0   | 0   | 0   | 0   | 0   | 0   | 0   | 0   | 0   | 0   | 3   | 0   | 0   | 0   | 0   |
| HT87  | 0   | 0   | 0   | 0   | 0   | 0   | 0   | 0   | 0   | 0   | 0   | 0   | 0   | 0   | 0   | 0   | 0   | 0   | 0   | 0   | 0   | 0   | 2   | 0   | 0   | 0   | 0   |
| HT88  | 0   | 0   | 0   | 0   | 0   | 0   | 0   | 0   | 0   | 0   | 0   | 0   | 0   | 0   | 0   | 0   | 0   | 0   | 0   | 0   | 0   | 0   | 0   | 1   | 0   | 0   | 0   |
| HT89  | 0   | 0   | 0   | 0   | 0   | 0   | 0   | 0   | 0   | 0   | 0   | 0   | 0   | 0   | 0   | 0   | 0   | 0   | 0   | 0   | 0   | 0   | 0   | 0   | 0   | 0   | 1   |
| HT90  | 0   | 0   | 0   | 0   | 0   | 0   | 0   | 0   | 0   | 0   | 0   | 0   | 0   | 0   | 0   | 0   | 0   | 0   | 0   | 0   | 0   | 0   | 0   | 0   | 0   | 0   | 1   |
| HT91  | 0   | 0   | 0   | 0   | 0   | 0   | 0   | 0   | 0   | 0   | 0   | 0   | 0   | 0   | 0   | 0   | 0   | 0   | 0   | 0   | 0   | 0   | 0   | 0   | 0   | 0   | 1   |
| HT92  | 0   | 0   | 0   | 0   | 0   | 0   | 0   | 0   | 0   | 0   | 0   | 0   | 0   | 0   | 0   | 0   | 0   | 0   | 0   | 0   | 0   | 0   | 1   | 0   | 0   | 0   | 0   |
| HT93  | 0   | 0   | 0   | 0   | 0   | 0   | 0   | 0   | 0   | 0   | 0   | 0   | 0   | 0   | 0   | 0   | 0   | 0   | 0   | 0   | 0   | 0   | 4   | 0   | 0   | 0   | 0   |
| HT94  | 0   | 0   | 0   | 0   | 0   | 0   | 0   | 0   | 0   | 0   | 0   | 0   | 0   | 0   | 0   | 0   | 0   | 0   | 0   | 0   | 0   | 0   | 3   | 0   | 0   | 0   | 0   |
| HT95  | 0   | 0   | 0   | 0   | 0   | 0   | 0   | 0   | 0   | 0   | 0   | 0   | 0   | 0   | 0   | 0   | 0   | 0   | 0   | 0   | 0   | 0   | 1   | 0   | 0   | 0   | 0   |
| HT96  | 0   | 0   | 0   | 0   | 0   | 0   | 0   | 0   | 0   | 0   | 0   | 0   | 0   | 0   | 0   | 0   | 0   | 0   | 0   | 0   | 0   | 0   | 0   | 1   | 0   | 0   | 0   |
| HT97  | 0   | 0   | 0   | 0   | 0   | 0   | 0   | 0   | 0   | 0   | 0   | 0   | 0   | 0   | 0   | 0   | 0   | 0   | 0   | 0   | 0   | 0   | 0   | 0   | 0   | 0   | 1   |
| HT98  | 0   | 0   | 0   | 0   | 0   | 0   | 0   | 0   | 0   | 0   | 0   | 0   | 0   | 0   | 0   | 0   | 0   | 0   | 0   | 0   | 0   | 0   | 0   | 0   | 0   | 0   | 2   |
| HT99  | 0   | 0   | 0   | 0   | 0   | 0   | 0   | 0   | 0   | 0   | 0   | 0   | 0   | 0   | 0   | 0   | 0   | 0   | 0   | 0   | 0   | 0   | 0   | 0   | 0   | 0   | 1   |
| HT100 | 0   | 0   | 0   | 0   | 0   | 0   | 0   | 0   | 0   | 0   | 0   | 0   | 0   | 0   | 0   | 0   | 0   | 0   | 0   | 0   | 0   | 0   | 0   | 0   | 0   | 0   | 1   |
| HT101 | 0   | 0   | 0   | 0   | 0   | 0   | 0   | 0   | 0   | 0   | 0   | 0   | 0   | 0   | 0   | 0   | 1   | 0   | 0   | 0   | 0   | 0   | 0   | 0   | 0   | 0   | 0   |
| HT102 | 0   | 0   | 0   | 0   | 0   | 0   | 0   | 0   | 0   | 0   | 0   | 0   | 0   | 1   | 0   | 0   | 1   | 0   | 0   | 0   | 0   | 0   | 0   | 0   | 0   | 0   | 0   |
| HT103 | 0   | 0   | 0   | 0   | 0   | 0   | 0   | 0   | 0   | 0   | 0   | 0   | 0   | 1   | 0   | 0   | 0   | 0   | 0   | 0   | 0   | 0   | 0   | 0   | 0   | 0   | 0   |
| HT104 | 0   | 0   | 0   | 0   | 0   | 0   | 0   | 0   | 0   | 0   | 0   | 0   | 0   | 0   | 0   | 0   | 1   | 0   | 0   | 0   | 0   | 0   | 0   | 0   | 0   | 0   | 0   |
| HT105 | 0   | 0   | 0   | 0   | 0   | 0   | 0   | 0   | 0   | 0   | 0   | 0   | 1   | 2   | 1   | 1   | 0   | 0   | 0   | 0   | 0   | 0   | 0   | 0   | 0   | 0   | 0   |
| HT106 | 0   | 0   | 0   | 0   | 0   | 0   | 0   | 0   | 0   | 0   | 0   | 0   | 0   | 1   | 1   | 0   | 0   | 0   | 0   | 0   | 0   | 0   | 0   | 0   | 0   | 0   | 0   |



Table 56: Haplotype counts per Location according to pegas (continued)

|       | GOC | COR | SIL | SAF | RUN | SEY | ARS | SRL | TAI | IND | PNG | FZR | VIR | DAR | ADR | SAR | EAR | BMB | ROR | TOR | WER | TRI | CLR | SYH | URR | OKI | FIJ |
|-------|-----|-----|-----|-----|-----|-----|-----|-----|-----|-----|-----|-----|-----|-----|-----|-----|-----|-----|-----|-----|-----|-----|-----|-----|-----|-----|-----|
| HT107 | 0   | 0   | 0   | 0   | 0   | 0   | 0   | 0   | 0   | 0   | 0   | 0   | 0   | 0   | 0   | 0   | 0   | 0   | 0   | 0   | 0   | 0   | 1   | 0   | 0   | 0   | 0   |
| HT108 | 0   | 0   | 0   | 1   | 0   | 0   | 0   | 0   | 0   | 0   | 0   | 0   | 0   | 0   | 0   | 0   | 0   | 0   | 0   | 0   | 0   | 0   | 0   | 0   | 0   | 0   | 0   |
| HT109 | 0   | 0   | 0   | 0   | 0   | 0   | 0   | 0   | 0   | 0   | 0   | 0   | 0   | 0   | 0   | 0   | 0   | 0   | 0   | 0   | 0   | 0   | 0   | 1   | 0   | 0   | 0   |
| HT110 | 0   | 0   | 0   | 0   | 0   | 0   | 0   | 0   | 0   | 0   | 1   | 0   | 0   | 0   | 0   | 0   | 0   | 0   | 0   | 0   | 0   | 0   | 0   | 0   | 0   | 0   | 0   |
| HT111 | 0   | 0   | 0   | 0   | 0   | 0   | 0   | 0   | 0   | 0   | 1   | 0   | 0   | 0   | 0   | 0   | 0   | 0   | 0   | 0   | 0   | 0   | 0   | 0   | 0   | 0   | 0   |
| HT112 | 0   | 0   | 0   | 0   | 0   | 0   | 0   | 0   | 0   | 0   | 0   | 0   | 0   | 0   | 0   | 0   | 0   | 0   | 0   | 0   | 0   | 0   | 0   | 1   | 0   | 0   | 0   |
| HT113 | 0   | 0   | 0   | 0   | 0   | 0   | 0   | 0   | 0   | 0   | 1   | 0   | 0   | 0   | 0   | 0   | 0   | 0   | 0   | 0   | 0   | 0   | 0   | 0   | 0   | 0   | 0   |
| HT114 | 0   | 0   | 0   | 0   | 0   | 0   | 0   | 0   | 0   | 0   | 1   | 0   | 0   | 0   | 0   | 0   | 0   | 0   | 0   | 0   | 0   | 0   | 0   | 0   | 0   | 0   | 0   |
| HT115 | 0   | 0   | 0   | 0   | 0   | 0   | 0   | 0   | 0   | 0   | 2   | 0   | 0   | 0   | 0   | 0   | 0   | 0   | 0   | 0   | 0   | 0   | 0   | 0   | 0   | 0   | 0   |
| HT116 | 0   | 0   | 0   | 0   | 0   | 0   | 0   | 0   | 0   | 0   | 2   | 0   | 0   | 0   | 0   | 0   | 0   | 0   | 0   | 0   | 0   | 0   | 0   | 0   | 0   | 0   | 0   |
| HT117 | 0   | 0   | 0   | 0   | 0   | 0   | 0   | 0   | 0   | 0   | 0   | 0   | 0   | 0   | 0   | 0   | 0   | 0   | 0   | 0   | 0   | 0   | 1   | 2   | 0   | 0   | 0   |
| HT118 | 0   | 0   | 0   | 0   | 0   | 0   | 0   | 0   | 0   | 0   | 0   | 0   | 0   | 0   | 0   | 0   | 0   | 0   | 0   | 0   | 0   | 0   | 0   | 1   | 0   | 0   | 0   |
| HT119 | 0   | 0   | 0   | 0   | 0   | 0   | 0   | 0   | 0   | 0   | 1   | 0   | 0   | 0   | 0   | 0   | 0   | 0   | 0   | 0   | 0   | 0   | 0   | 0   | 0   | 0   | 0   |
| HT120 | 0   | 0   | 0   | 0   | 0   | 0   | 0   | 0   | 0   | 0   | 0   | 0   | 0   | 0   | 0   | 0   | 0   | 0   | 0   | 1   | 0   | 0   | 0   | 0   | 0   | 0   | 0   |
| HT121 | 0   | 0   | 0   | 0   | 0   | 0   | 0   | 0   | 0   | 0   | 0   | 0   | 0   | 0   | 0   | 0   | 0   | 0   | 0   | 0   | 0   | 0   | 1   | 0   | 0   | 0   | 0   |
| HT122 | 0   | 0   | 0   | 0   | 0   | 0   | 0   | 0   | 0   | 0   | 1   | 0   | 0   | 0   | 0   | 0   | 0   | 0   | 0   | 0   | 0   | 0   | 0   | 0   | 0   | 0   | 0   |
| HT123 | 0   | 0   | 0   | 0   | 0   | 0   | 0   | 0   | 0   | 0   | 1   | 0   | 0   | 0   | 0   | 0   | 0   | 0   | 0   | 0   | 0   | 0   | 0   | 0   | 0   | 0   | 0   |
| HT124 | 0   | 0   | 0   | 0   | 0   | 0   | 0   | 0   | 0   | 0   | 0   | 0   | 0   | 0   | 0   | 0   | 0   | 0   | 0   | 0   | 0   | 0   | 0   | 0   | 4   | 1   | 0   |
| HT125 | 0   | 0   | 0   | 0   | 0   | 0   | 0   | 0   | 0   | 0   | 0   | 0   | 0   | 0   | 0   | 0   | 0   | 0   | 0   | 0   | 0   | 0   | 0   | 0   | 2   | 0   | 0   |
| HT126 | 0   | 0   | 0   | 0   | 0   | 0   | 0   | 0   | 0   | 0   | 0   | 0   | 0   | 0   | 0   | 0   | 0   | 1   | 0   | 0   | 0   | 0   | 0   | 0   | 0   | 0   | 0   |
| HT127 | 0   | 0   | 0   | 0   | 0   | 0   | 0   | 0   | 0   | 0   | 0   | 0   | 0   | 0   | 0   | 0   | 0   | 3   | 0   | 0   | 2   | 0   | 0   | 0   | 0   | 0   | 0   |
| HT128 | 0   | 0   | 0   | 0   | 0   | 0   | 0   | 0   | 0   | 0   | 0   | 0   | 0   | 0   | 0   | 0   | 0   | 4   | 0   | 0   | 0   | 0   | 0   | 0   | 0   | 0   | 0   |
| HT129 | 0   | 0   | 0   | 0   | 0   | 0   | 0   | 0   | 0   | 0   | 0   | 0   | 0   | 1   | 0   | 0   | 0   | 0   | 0   | 0   | 0   | 0   | 0   | 0   | 0   | 0   | 0   |
| HT130 | 0   | 0   | 0   | 0   | 0   | 0   | 0   | 0   | 0   | 0   | 0   | 0   | 0   | 1   | 0   | 0   | 0   | 0   | 0   | 0   | 0   | 0   | 0   | 0   | 0   | 0   | 0   |
| HT131 | 0   | 0   | 0   | 0   | 0   | 0   | 0   | 0   | 0   | 1   | 0   | 0   | 0   | 0   | 0   | 0   | 0   | 0   | 0   | 0   | 0   | 0   | 0   | 0   | 0   | 0   | 0   |
| HT132 | 0   | 0   | 0   | 0   | 0   | 0   | 0   | 0   | 0   | 1   | 0   | 0   | 0   | 0   | 0   | 0   | 0   | 0   | 0   | 0   | 0   | 0   | 0   | 0   | 0   | 0   | 0   |
| HT133 | 0   | 0   | 0   | 0   | 0   | 0   | 0   | 1   | 0   | 0   | 0   | 0   | 0   | 0   | 0   | 0   | 0   | 0   | 0   | 0   | 0   | 0   | 0   | 0   | 0   | 0   | 0   |
| HT134 | 0   | 0   | 0   | 0   | 0   | 0   | 0   | 0   | 0   | 0   | 0   | 0   | 1   | 0   | 0   | 0   | 0   | 0   | 0   | 0   | 0   | 0   | 0   | 0   | 0   | 0   | 0   |
| HT135 | 0   | 0   | 0   | 0   | 0   | 0   | 0   | 0   | 0   | 0   | 0   | 0   | 1   | 0   | 0   | 0   | 0   | 0   | 0   | 0   | 0   | 0   | 0   | 0   | 0   | 0   | 0   |
| HT136 | 0   | 0   | 0   | 0   | 0   | 0   | 0   | 0   | 0   | 0   | 0   | 0   | 0   | 0   | 2   | 1   | 0   | 0   | 0   | 0   | 0   | 0   | 0   | 0   | 0   | 0   | 0   |
| HT137 | 0   | 0   | 0   | 0   | 0   | 0   | 1   | 1   | 0   | 0   | 0   | 0   | 0   | 0   | 0   | 0   | 1   | 0   | 0   | 0   | 0   | 0   | 0   | 0   | 0   | 0   | 0   |
| HT138 | 0   | 0   | 0   | 0   | 0   | 0   | 0   | 1   | 0   | 0   | 0   | 0   | 0   | 0   | 0   | 0   | 0   | 0   | 0   | 0   | 0   | 0   | 0   | 0   | 0   | 0   | 0   |
| HT139 | 0   | 0   | 0   | 0   | 0   | 0   | 0   | 0   | 0   | 0   | 0   | 0   | 0   | 0   | 1   | 0   | 0   | 0   | 0   | 0   | 0   | 0   | 0   | 0   | 0   | 0   | 0   |
| HT140 | 0   | 0   | 0   | 0   | 0   | 0   | 0   | 1   | 0   | 0   | 0   | 0   | 0   | 0   | 0   | 0   | 0   | 0   | 0   | 0   | 0   | 0   | 0   | 0   | 0   | 0   | 0   |
| HT141 | 0   | 0   | 0   | 0   | 0   | 0   | 0   | 1   | 0   | 0   | 0   | 0   | 0   | 0   | 0   | 0   | 0   | 0   | 0   | 0   | 0   | 0   | 0   | 0   | 0   | 0   | 0   |
| HT142 | 0   | 0   | 0   | 0   | 0   | 0   | 0   | 0   | 0   | 0   | 0   | 0   | 1   | 0   | 0   | 0   | 0   | 0   | 0   | 0   | 0   | 0   | 0   | 0   | 0   | 0   | 0   |
| HT143 | 0   | 0   | 0   | 0   | 0   | 0   | 0   | 0   | 0   | 1   | 0   | 0   | 0   | 0   | 0   | 0   | 0   | 0   | 0   | 0   | 0   | 0   | 0   | 0   | 0   | 0   | 0   |
| HT144 | 0   | 0   | 0   | 0   | 0   | 0   | 0   | 0   | 0   | 1   | 0   | 0   | 0   | 0   | 0   | 0   | 0   | 0   | 0   | 0   | 0   | 0   | 0   | 0   | 0   | 0   | 0   |
| HT145 | 0   | 0   | 0   | 0   | 0   | 0   | 0   | 0   | 0   | 1   | 0   | 0   | 0   | 0   | 0   | 0   | 0   | 0   | 0   | 0   | 0   | 0   | 0   | 0   | 0   | 0   | 0   |
| HT146 | 0   | 0   | 0   | 0   | 0   | 0   | 0   | 0   | 0   | 0   | 0   | 0   | 0   | 0   | 1   | 0   | 0   | 0   | 0   | 0   | 0   | 0   | 0   | 0   | 0   | 0   | 0   |
| HT147 | 0   | 0   | 0   | 0   | 0   | 0   | 0   | 0   | 0   | 0   | 0   | 0   | 0   | 0   | 0   | 0   | 0   | 0   | 0   | 0   | 0   | 0   | 0   | 1   | 0   | 0   | 0   |
| HT148 | 0   | 0   | 0   | 0   | 0   | 0   | 0   | 0   | 0   | 0   | 0   | 0   | 0   | 0   | 1   | 0   | 0   | 0   | 0   | 0   | 0   | 0   | 0   | 0   | 0   | 0   | 0   |
| HT149 | 0   | 0   | 0   | 0   | 0   | 0   | 0   | 0   | 0   | 0   | 0   | 0   | 0   | 0   | 1   | 0   | 0   | 0   | 0   | 0   | 0   | 0   | 0   | 0   | 0   | 0   | 0   |
| HT150 | 0   | 0   | 0   | 0   | 0   | 0   | 0   | 0   | 0   | 0   | 0   | 0   | 1   | 1   | 1   | 0   | 0   | 0   | 0   | 0   | 0   | 0   | 0   | 0   | 0   | 0   | 0   |
| HT151 | 0   | 0   | 0   | 0   | 0   | 0   | 0   | 0   | 0   | 0   | 1   | 0   | 0   | 0   | 0   | 0   | 0   | 0   | 0   | 0   | 0   | 0   | 0   | 0   | 0   | 0   | 0   |
| HT152 | 0   | 0   | 0   | 0   | 0   | 0   | 0   | 0   | 0   | 0   | 0   | 0   | 0   | 0   | 0   | 0   | 0   | 0   | 0   | 0   | 0   | 0   | 0   | 0   | 4   | 7   | 0   |
| HT153 | 0   | 0   | 0   | 0   | 0   | 0   | 0   | 0   | 0   | 0   | 0   | 0   | 0   | 0   | 0   | 0   | 0   | 0   | 0   | 0   | 0   | 0   | 0   | 0   | 0   | 13  | 0   |
| HT154 | 0   | 0   | 0   | 0   | 0   | 0   | 0   | 0   | 1   | 0   | 0   | 0   | 0   | 0   | 0   | 0   | 0   | 0   | 0   | 0   | 0   | 0   | 0   | 0   | 0   | 0   | 0   |
| HT155 | 0   | 4   | 0   | 0   | 0   | 0   | 0   | 0   | 0   | 0   | 0   | 0   | 0   | 0   | 0   | 0   | 0   | 0   | 0   | 0   | 0   | 0   | 0   | 0   | 0   | 0   | 0   |
| HT156 | 0   | 2   | 0   | 0   | 0   | 0   | 0   | 0   | 0   | 0   | 0   | 0   | 0   | 0   | 0   | 0   | 0   | 0   | 0   | 0   | 0   | 0   | 0   | 0   | 0   | 0   | 0   |
| HT157 | 0   | 1   | 0   | 0   | 0   | 0   | 0   | 0   | 0   | 0   | 0   | 0   | 0   | 0   | 0   | 0   | 0   | 0   | 0   | 0   | 0   | 0   | 0   | 0   | 0   | 0   | 0   |
| HT158 | 0   | 2   | 0   | 0   | 0   | 0   | 0   | 0   | 0   | 0   | 0   | 0   | 0   | 0   | 0   | 0   | 0   | 0   | 0   | 0   | 0   | 0   | 0   | 0   | 0   | 0   | 0   |
| HT159 | 0   | 1   | 0   | 0   | 0   | 0   | 0   | 0   | 0   | 0   | 0   | 0   | 0   | 0   | 0   | 0   | 0   | 0   | 0   | 0   | 0   | 0   | 0   | 0   | 0   | 0   | 0   |

Table 56: Haplotype counts per Location according to pegas (continued)

|       | GOC | COR | SIL | SAF | RUN | SEY | ARS | SRL | TAI | IND | PNG | FZR | VIR | DAR | ADR | SAR | EAR | BMB | ROR | TOR | WER | TRI | CLR | SYH | URR | OKI | FIJ |   |
|-------|-----|-----|-----|-----|-----|-----|-----|-----|-----|-----|-----|-----|-----|-----|-----|-----|-----|-----|-----|-----|-----|-----|-----|-----|-----|-----|-----|---|
| HT160 | 0   | 1   | 0   | 0   | 0   | 0   | 0   | 0   | 0   | 0   | 0   | 0   | 0   | 0   | 0   | 0   | 0   | 0   | 0   | 0   | 0   | 0   | 0   | 0   | 0   | 0   | 0   | 0 |
| HT161 | 0   | 1   | 0   | 0   | 0   | 0   | 0   | 0   | 0   | 0   | 0   | 0   | 0   | 0   | 0   | 0   | 0   | 0   | 0   | 0   | 0   | 0   | 0   | 0   | 0   | 0   | 0   | 0 |
| HT162 | 1   | 0   | 0   | 0   | 0   | 0   | 0   | 0   | 0   | 0   | 0   | 0   | 0   | 0   | 0   | 0   | 0   | 0   | 0   | 0   | 0   | 0   | 0   | 0   | 0   | 0   | 0   | 0 |
| HT163 | 0   | 2   | 0   | 0   | 0   | 0   | 0   | 0   | 0   | 0   | 0   | 0   | 0   | 0   | 0   | 0   | 0   | 0   | 0   | 0   | 0   | 0   | 0   | 0   | 0   | 0   | 0   | 0 |
| HT164 | 0   | 1   | 0   | 0   | 0   | 0   | 0   | 0   | 0   | 0   | 0   | 0   | 0   | 0   | 0   | 0   | 0   | 0   | 0   | 0   | 0   | 0   | 0   | 0   | 0   | 0   | 0   | 0 |
| HT165 | 0   | 0   | 1   | 0   | 0   | 0   | 0   | 0   | 0   | 0   | 0   | 0   | 0   | 0   | 0   | 0   | 0   | 0   | 0   | 0   | 0   | 0   | 0   | 0   | 0   | 0   | 0   | 0 |

```

strata <- as.character(BS.gt@schemes$Site)
names(strata) <- as.character(BS.gt@schemes$id)
strataG::setStrata(BS.gt) <- strata
BS.gt.AUS <- BS.gt[,,"Australia", drop = TRUE]

schemes.AUS <- BS.gt.AUS@schemes[BS.gt.AUS@schemes$Site == "Australia",]
strata <- as.character(schemes.AUS$Location)
names(strata) <- as.character(schemes.AUS$id)
strataG::setStrata(BS.gt.AUS) <- strata
BS.gt.AUS@schemes <- schemes.AUS

group.levels <- c("Fitzroy River", "Victoria River", "Daly River","Adelaide River",
                "South Alligator River","East Alligator River","Blue mud Bay",
                "Roper River","Townsville River","Wenlock River","Trinity inlet",
                "Clarence River","Sydney Harbour")
BS.gt.AUS@schemes$Location <- factor(BS.gt.AUS@schemes$Location,
                                     levels = group.levels)

ind.names <- names(BS.dna) %in% BS.gt.AUS@data$id
BS.dna.AUS <- as.dna(BS.dna[ind.names, , drop = TRUE])
BS.bin.AUS <- subset(BS.bin, names(BS.bin) %in% BS.gt.AUS@data$id)
BS.hap.aus <- strataG::labelHaplotypes(BS.bin.AUS, prefix = "HT",
                                       use.indels = TRUE)

haps <- BS.hap.aus$haps
HTs <- unique(haps[names(haps) %in% names(BS.bin.AUS)])
BS.h.AUS <- pegas::haplotype(BS.bin.AUS, HTs)

hapcount <- pegas::haploFreq(BS.dna.AUS@sequence,
                             fac = BS.gt.AUS@schemes$Location,
                             split = NULL, what = 1, haplo = NULL)
row.names(hapcount) <- paste0("HT", sprintf('%0.3d', 1:85))
shortnames <- c("FZR", "VIR", "DAR", "ADR","SAR", "EAR","BMB", "ROR","TOR",
               "WER","TRI","CLR", "SYH")

kableExtra::kbl(hapcount, col.names = shortnames,
                caption = "Haplotype counts per Site according to pegas",
                longtable = TRUE, booktabs = TRUE) %>%
  kableExtra::kable_styling(full_width = FALSE,font_size = 5,
                            latex_options = c("repeat_header", "hold_position"))

group.names <- BS.gt.AUS@schemes$Location
BS.hap.aus <- haplotypes::haplotype(BS.dna.AUS,indels = "sic")
HTs <- paste0("HT", sprintf('%0.3d', 1:85))
df <- data.frame(group = NULL,nind = NULL, hap = NULL, nhap = NULL,
                 hapfreq = NULL, stringsAsFactors = FALSE)
for (k in 1:length(group.levels)) {
  group.inds <- BS.gt.AUS@schemes$id[group.names == group.levels[k]]
  for (i in 1:85) {
    group <- group.levels[k]
    nind <- length(group.inds)
    hap <- HTs[i]
    nhap <- sum(group.inds %in% BS.hap.aus@haplist[[i]])
    # nhap <- sum(group.inds %in% names(BS.hap.aus$haps)[BS.hap.aus$haps == hap])
    hapfreq <- nhap/nind
  }
}

```

```

df <- plyr::rbind.fill(df, data.frame(group = group, nind = nind,
                                     hap = hap,
                                     nhap = nhap, hapfreq = hapfreq,
                                     stringsAsFactors = FALSE))
}
}

df$group <- factor(df$group, levels = group.levels)

HT.plot <- ggplot2::ggplot(data = df) +
  ggplot2::geom_bar(ggplot2::aes(x = hap, y = nhap, fill = group),
                   stat = "identity", position = "stack") +
  ggplot2::labs(x = "Haplotypes", y = "Number of individuals") +
  ggplot2::scale_fill_manual(values = colours.13) +
  ggplot2::theme(
    axis.text = ggplot2::element_text(angle = 45, hjust = 1, size = 5),
    axis.title.x = ggplot2::element_text(size = 10),
    axis.title.y = ggplot2::element_text(size = 10),
    legend.text = ggplot2::element_text(size = 7))
print(HT.plot)

```

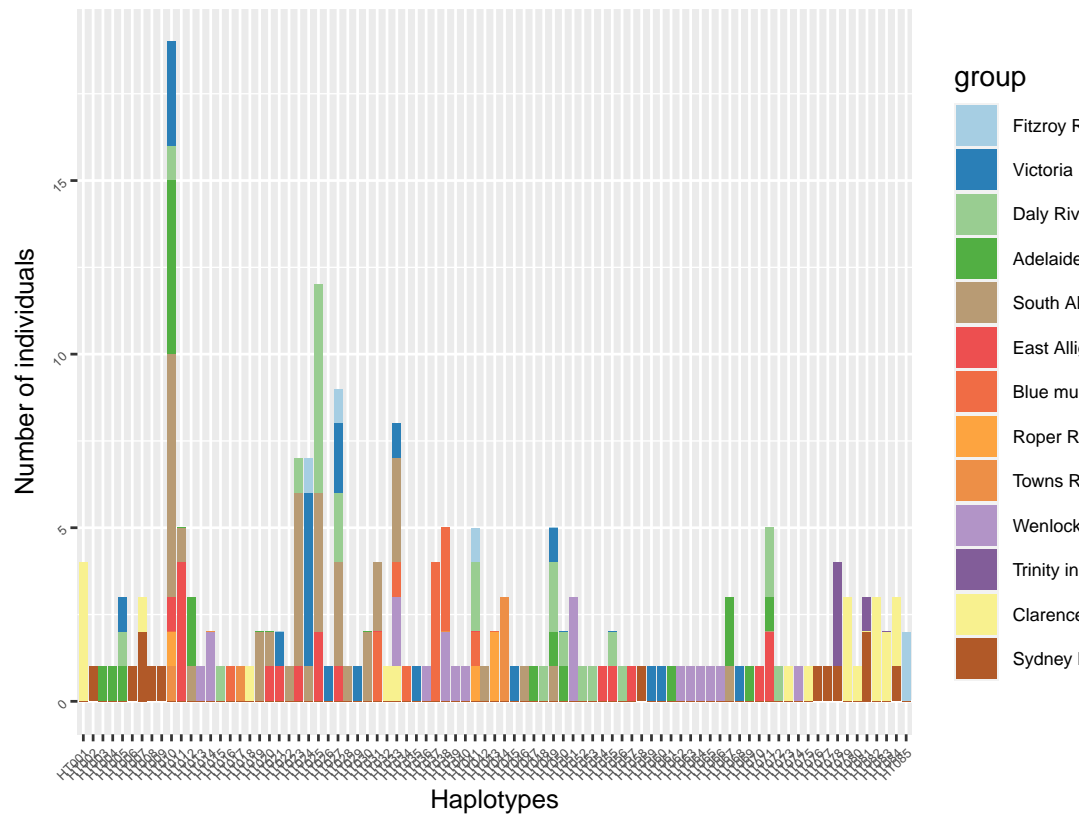

### 13.3.2.1 Within AUS

```

ggplot2::ggsave(HT.plot, filename = "HT_barplot_per_Location_AUS.png",
                 width = 30, height = 15, units = "cm")

```

Table 57: Haplotype counts per Site according to pegas

|       | FZR | VIR | DAR | ADR | SAR | EAR | BMB | ROR | TOR | WER | TRI | CLR | SYH |
|-------|-----|-----|-----|-----|-----|-----|-----|-----|-----|-----|-----|-----|-----|
| HT001 | 2   | 0   | 0   | 0   | 0   | 0   | 0   | 0   | 0   | 0   | 0   | 0   | 0   |
| HT002 | 0   | 0   | 0   | 0   | 0   | 0   | 0   | 0   | 0   | 0   | 1   | 0   | 2   |
| HT003 | 0   | 0   | 0   | 0   | 0   | 0   | 0   | 0   | 0   | 0   | 3   | 0   | 1   |
| HT004 | 0   | 0   | 1   | 0   | 0   | 0   | 0   | 0   | 0   | 0   | 0   | 0   | 0   |
| HT005 | 0   | 0   | 0   | 0   | 0   | 0   | 0   | 0   | 0   | 0   | 0   | 0   | 1   |
| HT006 | 0   | 0   | 0   | 0   | 0   | 0   | 0   | 0   | 0   | 1   | 0   | 0   | 0   |
| HT007 | 0   | 0   | 0   | 0   | 2   | 0   | 0   | 0   | 0   | 0   | 0   | 0   | 0   |
| HT008 | 0   | 0   | 0   | 0   | 1   | 4   | 0   | 0   | 0   | 0   | 0   | 0   | 0   |

Table 57: Haplotype counts per Site according to pegas (continued)

|       | FZR | VIR | DAR | ADR | SAR | EAR | BMB | ROR | TOR | WER | TRI | CLR | SYH |
|-------|-----|-----|-----|-----|-----|-----|-----|-----|-----|-----|-----|-----|-----|
| HT009 | 0   | 0   | 0   | 2   | 1   | 0   | 0   | 0   | 0   | 0   | 0   | 0   | 0   |
| HT010 | 0   | 1   | 0   | 0   | 0   | 0   | 0   | 0   | 0   | 0   | 0   | 0   | 0   |
| HT011 | 1   | 5   | 0   | 0   | 1   | 0   | 0   | 0   | 0   | 0   | 0   | 0   | 0   |
| HT012 | 0   | 1   | 0   | 0   | 0   | 0   | 0   | 0   | 0   | 0   | 0   | 0   | 0   |
| HT013 | 0   | 0   | 0   | 0   | 0   | 0   | 0   | 0   | 3   | 0   | 0   | 0   | 0   |
| HT014 | 0   | 0   | 0   | 0   | 0   | 0   | 0   | 2   | 0   | 0   | 0   | 0   | 0   |
| HT015 | 0   | 0   | 0   | 0   | 1   | 1   | 0   | 0   | 0   | 0   | 0   | 0   | 0   |
| HT016 | 0   | 0   | 0   | 0   | 2   | 0   | 0   | 0   | 0   | 0   | 0   | 0   | 0   |
| HT017 | 0   | 1   | 0   | 0   | 0   | 1   | 0   | 0   | 0   | 0   | 0   | 0   | 0   |
| HT018 | 0   | 0   | 0   | 0   | 1   | 0   | 0   | 0   | 0   | 0   | 0   | 0   | 0   |
| HT019 | 0   | 0   | 0   | 0   | 1   | 0   | 0   | 0   | 0   | 0   | 0   | 0   | 0   |
| HT020 | 0   | 0   | 0   | 0   | 1   | 0   | 0   | 0   | 0   | 0   | 0   | 0   | 0   |
| HT021 | 1   | 0   | 2   | 0   | 0   | 0   | 1   | 1   | 0   | 0   | 0   | 0   | 0   |
| HT022 | 0   | 0   | 0   | 0   | 2   | 0   | 2   | 0   | 0   | 0   | 0   | 0   | 0   |
| HT023 | 1   | 2   | 2   | 0   | 3   | 1   | 0   | 0   | 0   | 0   | 0   | 0   | 0   |
| HT024 | 0   | 1   | 0   | 0   | 0   | 0   | 0   | 0   | 0   | 0   | 0   | 0   | 0   |
| HT025 | 0   | 0   | 0   | 1   | 0   | 0   | 0   | 0   | 0   | 0   | 0   | 0   | 0   |
| HT026 | 0   | 0   | 0   | 0   | 1   | 0   | 0   | 0   | 0   | 0   | 0   | 0   | 0   |
| HT027 | 0   | 0   | 6   | 0   | 4   | 2   | 0   | 0   | 0   | 0   | 0   | 0   | 0   |
| HT028 | 0   | 0   | 1   | 0   | 5   | 1   | 0   | 0   | 0   | 0   | 0   | 0   | 0   |
| HT029 | 0   | 0   | 1   | 0   | 0   | 0   | 0   | 0   | 0   | 0   | 0   | 0   | 0   |
| HT030 | 0   | 0   | 0   | 0   | 0   | 0   | 1   | 0   | 0   | 0   | 0   | 0   | 0   |
| HT031 | 0   | 0   | 0   | 0   | 0   | 0   | 0   | 0   | 0   | 1   | 0   | 0   | 0   |
| HT032 | 0   | 3   | 1   | 5   | 7   | 1   | 0   | 1   | 1   | 0   | 0   | 0   | 0   |
| HT033 | 0   | 1   | 0   | 0   | 3   | 0   | 1   | 0   | 0   | 2   | 0   | 1   | 0   |
| HT034 | 0   | 0   | 0   | 0   | 0   | 0   | 0   | 0   | 0   | 1   | 0   | 0   | 0   |
| HT035 | 0   | 0   | 0   | 0   | 0   | 0   | 0   | 0   | 0   | 1   | 0   | 0   | 0   |
| HT036 | 0   | 1   | 0   | 0   | 0   | 0   | 0   | 0   | 0   | 0   | 0   | 0   | 0   |
| HT037 | 0   | 0   | 0   | 0   | 0   | 0   | 0   | 0   | 0   | 2   | 0   | 0   | 0   |
| HT038 | 0   | 0   | 0   | 0   | 0   | 0   | 0   | 0   | 0   | 1   | 0   | 0   | 0   |
| HT039 | 0   | 0   | 0   | 0   | 0   | 0   | 0   | 0   | 0   | 1   | 0   | 0   | 0   |
| HT040 | 0   | 0   | 0   | 0   | 0   | 0   | 0   | 0   | 0   | 1   | 0   | 0   | 0   |
| HT041 | 0   | 0   | 0   | 0   | 0   | 0   | 0   | 0   | 0   | 1   | 0   | 0   | 0   |
| HT042 | 0   | 0   | 0   | 0   | 0   | 0   | 0   | 0   | 0   | 3   | 0   | 0   | 0   |
| HT043 | 0   | 0   | 1   | 0   | 0   | 0   | 0   | 0   | 0   | 0   | 0   | 0   | 0   |
| HT044 | 0   | 0   | 2   | 1   | 0   | 2   | 0   | 0   | 0   | 0   | 0   | 0   | 0   |
| HT045 | 0   | 0   | 0   | 0   | 0   | 0   | 0   | 0   | 0   | 1   | 0   | 0   | 0   |
| HT046 | 0   | 0   | 0   | 0   | 0   | 0   | 0   | 0   | 0   | 1   | 0   | 0   | 0   |
| HT047 | 0   | 0   | 0   | 0   | 0   | 0   | 0   | 0   | 0   | 0   | 0   | 1   | 0   |
| HT048 | 0   | 0   | 0   | 0   | 0   | 0   | 0   | 0   | 0   | 0   | 0   | 2   | 1   |
| HT049 | 0   | 0   | 0   | 0   | 0   | 0   | 0   | 0   | 0   | 0   | 0   | 3   | 0   |
| HT050 | 0   | 0   | 0   | 0   | 0   | 0   | 0   | 0   | 0   | 0   | 0   | 2   | 0   |
| HT051 | 0   | 0   | 0   | 0   | 0   | 0   | 0   | 0   | 0   | 0   | 0   | 0   | 1   |
| HT052 | 0   | 0   | 0   | 0   | 0   | 0   | 0   | 0   | 0   | 0   | 0   | 1   | 0   |
| HT053 | 0   | 0   | 0   | 0   | 0   | 0   | 0   | 0   | 0   | 0   | 0   | 4   | 0   |
| HT054 | 0   | 0   | 0   | 0   | 0   | 0   | 0   | 0   | 0   | 0   | 0   | 3   | 0   |
| HT055 | 0   | 0   | 0   | 0   | 0   | 0   | 0   | 0   | 0   | 0   | 0   | 1   | 0   |
| HT056 | 0   | 0   | 0   | 0   | 0   | 0   | 0   | 0   | 0   | 0   | 0   | 0   | 1   |
| HT057 | 0   | 0   | 0   | 0   | 0   | 1   | 0   | 0   | 0   | 0   | 0   | 0   | 0   |
| HT058 | 0   | 0   | 1   | 0   | 0   | 1   | 0   | 0   | 0   | 0   | 0   | 0   | 0   |
| HT059 | 0   | 0   | 1   | 0   | 0   | 0   | 0   | 0   | 0   | 0   | 0   | 0   | 0   |
| HT060 | 0   | 0   | 0   | 0   | 0   | 1   | 0   | 0   | 0   | 0   | 0   | 0   | 0   |
| HT061 | 0   | 1   | 2   | 1   | 1   | 0   | 0   | 0   | 0   | 0   | 0   | 0   | 0   |
| HT062 | 0   | 0   | 1   | 1   | 0   | 0   | 0   | 0   | 0   | 0   | 0   | 0   | 0   |
| HT063 | 0   | 0   | 0   | 0   | 0   | 0   | 0   | 0   | 0   | 0   | 0   | 1   | 0   |
| HT064 | 0   | 0   | 0   | 0   | 0   | 0   | 0   | 0   | 0   | 0   | 0   | 0   | 1   |
| HT065 | 0   | 0   | 0   | 0   | 0   | 0   | 0   | 0   | 0   | 0   | 0   | 0   | 1   |
| HT066 | 0   | 0   | 0   | 0   | 0   | 0   | 0   | 0   | 0   | 0   | 0   | 1   | 2   |
| HT067 | 0   | 0   | 0   | 0   | 0   | 0   | 0   | 0   | 0   | 0   | 0   | 0   | 1   |
| HT068 | 0   | 0   | 0   | 0   | 0   | 0   | 0   | 0   | 1   | 0   | 0   | 0   | 0   |
| HT069 | 0   | 0   | 0   | 0   | 0   | 0   | 0   | 0   | 0   | 0   | 0   | 1   | 0   |
| HT070 | 0   | 0   | 0   | 0   | 0   | 0   | 1   | 0   | 0   | 0   | 0   | 0   | 0   |
| HT071 | 0   | 0   | 0   | 0   | 0   | 0   | 3   | 0   | 0   | 2   | 0   | 0   | 0   |
| HT072 | 0   | 0   | 0   | 0   | 0   | 0   | 4   | 0   | 0   | 0   | 0   | 0   | 0   |
| HT073 | 0   | 0   | 1   | 0   | 0   | 0   | 0   | 0   | 0   | 0   | 0   | 0   | 0   |
| HT074 | 0   | 0   | 1   | 0   | 0   | 0   | 0   | 0   | 0   | 0   | 0   | 0   | 0   |
| HT075 | 0   | 1   | 0   | 0   | 0   | 0   | 0   | 0   | 0   | 0   | 0   | 0   | 0   |
| HT076 | 0   | 1   | 0   | 0   | 0   | 0   | 0   | 0   | 0   | 0   | 0   | 0   | 0   |
| HT077 | 0   | 0   | 0   | 2   | 1   | 0   | 0   | 0   | 0   | 0   | 0   | 0   | 0   |
| HT078 | 0   | 0   | 0   | 0   | 0   | 1   | 0   | 0   | 0   | 0   | 0   | 0   | 0   |
| HT079 | 0   | 0   | 0   | 1   | 0   | 0   | 0   | 0   | 0   | 0   | 0   | 0   | 0   |
| HT080 | 0   | 1   | 0   | 0   | 0   | 0   | 0   | 0   | 0   | 0   | 0   | 0   | 0   |
| HT081 | 0   | 0   | 0   | 1   | 0   | 0   | 0   | 0   | 0   | 0   | 0   | 0   | 0   |
| HT082 | 0   | 0   | 0   | 0   | 0   | 0   | 0   | 0   | 0   | 0   | 0   | 0   | 1   |
| HT083 | 0   | 0   | 0   | 1   | 0   | 0   | 0   | 0   | 0   | 0   | 0   | 0   | 0   |
| HT084 | 0   | 0   | 0   | 1   | 0   | 0   | 0   | 0   | 0   | 0   | 0   | 0   | 0   |
| HT085 | 0   | 1   | 1   | 1   | 0   | 0   | 0   | 0   | 0   | 0   | 0   | 0   | 0   |

### 13.3.3 Diversity per Site

```
strata <- as.character(BS.gt@schemes$Site)
names(strata) <- as.character(BS.gt@schemes$id)
strataG::setStrata(BS.gt) <- strata

divers.Site <- data.frame(Site = character(), pi.strataG = numeric(),
                          pi.pegas = numeric(), pi.pegas.var = numeric(),
                          HT.richness.strataG = numeric(), h.pegas = numeric(),
                          h.pegas.var = numeric())
for (Site in levels(BS.gt@schemes$Site)) {
  print(Site)
  BS.gt.sub <- BS.gt[, , Site, drop = TRUE]
  BS.bin.sub <- subset(BS.bin, names(BS.bin) %in% BS.gt.sub@data$id)
  BS.h.sub <- strataG::labelHaplotypes(BS.bin.sub, prefix = "HT",
                                       use.indels = TRUE)
  BS.dna.sub <- as.dna(BS.dna[names(BS.dna) %in% BS.gt.sub@data$id, ,
                             drop = TRUE])
  bases <- haplotypes::basecomp(BS.dna.sub)
  print(paste0("Mitogenome base composition:"))
  print(colMeans(bases))

  pi.gt <-
    strataG::nucleotideDiversity(BS.gt.sub, bases = c("a", "c", "g", "t"),
                                 simplify = TRUE)
  pi.peg <- pegas::nuc.div(BS.bin.sub, variance = TRUE,
                           pairwise.deletion = FALSE)
  h.peg <- pegas::hap.div(BS.bin.sub, variance = TRUE, method = "Nei")
  res <- data.frame(Site, mean(pi.gt), pi.peg[1], pi.peg[2],
                    length(unique(BS.h.sub$haps)),
                    h.peg[1], h.peg[2])
  colnames(res) <- c("Site", "pi.strataG", "pi.pegas", "pi.pegas.var",
                    "HT.richness.strataG", "h.pegas", "h.pegas.var")
  divers.Site <- rbind(divers.Site, res)
}

knitr::kable(
  divers.Site,
  caption = "Nucleotide and haplotype diversity per Site",
  # format = "html",
  digits = 6
) %>%
  kableExtra::kable_styling(full_width = FALSE, font_size = 5,
                             latex_options = c("hold_position"))

dA.gt <- strataG::nucleotideDivergence(BS.gt,
                                       probs = c(0, 0.025, 0.5, 0.975, 1),
                                       model = "RAW")

knitr::kable(
  dA.gt$within[order(dA.gt$within$mean, decreasing = TRUE), -1],
  # format = "html",
  caption = "Nucleotide divergence within each Site",
  digits = 6
) %>%
  kableExtra::kable_styling(full_width = FALSE, font_size = 5)
knitr::kable(
  dA.gt$between[order(dA.gt$between$mean, decreasing = TRUE), -1],
```

```

# format = "html",
caption = "Nucleotide divergence between each Site",
digits = 6
) %>%
kableExtra::kable_styling(full_width = FALSE, font_size = 5)

hapcount <- pegas::haploFreq(BS.dna@sequence, fac = BS.gt@schemes$Site,
                           split = NULL, what = 1, haplo = NULL)
row.names(hapcount) <- paste0("HT", sprintf('%0.2d', 1:BS.hap@nhap))
shortnames <- c("GOC", "COR", "SIL", "SAF", "RUN", "SEY", "ARS", "SRL", "TAI",
               "IND", "PNG", "AUS", "JAP", "FIJ")

kableExtra::kbl(hapcount, col.names = shortnames,
               caption = "Haplotype counts per Site according to pegas",
               longtable = TRUE, booktabs = TRUE) %>%
kableExtra::kable_styling(full_width = FALSE, font_size = 5,
                          latex_options = c("repeat_header", "hold_position"))

group.levels <- levels(BS.gi$other$ind.meta$Site)
group.names <- BS.gi$other$ind.meta$Site

HTs <- paste0("HT", sprintf('%0.3d', 1:BS.hap@nhap))
df <- data.frame(group = NULL, nind = NULL, hap = NULL, nhap = NULL,
                hapfreq = NULL, stringsAsFactors = FALSE)
for (k in 1:length(group.levels)) {
  group.inds <- adegenet::indNames(BS.gi)[group.names == group.levels[k]]
  for (i in 1:BS.hap@nhap) {
    group <- group.levels[k]
    nind <- length(group.inds)
    hap <- HTs[i]
    nhap <- sum(group.inds %in% BS.hap@haplist[[i]])
    hapfreq <- nhap/nind
    df <- plyr::rbind.fill(df, data.frame(group = group, nind = nind, hap = hap,
                                          nhap = nhap, hapfreq = hapfreq,
                                          stringsAsFactors = FALSE))
  }
}

df$group <- factor(df$group, levels = group.levels)

haplotype.labels <- unique(df$hap)
haplotype.labels2 <- haplotype.labels[seq(1, length(haplotype.labels), by = 5)]

HT.plot <- ggplot2::ggplot(data = df) +
  ggplot2::geom_bar(ggplot2::aes(x = hap, y = nhap, fill = group),
                   stat = "identity", position = "stack") +
  ggplot2::labs(x = "Haplotypes", y = "Number of individuals") +
  ggplot2::scale_fill_manual(values = funky(15)) +
  ggplot2::scale_x_discrete(breaks = haplotype.labels2) +
  ggplot2::theme(
    axis.text = ggplot2::element_text(angle = 45, hjust = 1, size = 5),
    axis.title.x = ggplot2::element_text(size = 10),
    axis.title.y = ggplot2::element_text(size = 10),
    legend.text = ggplot2::element_text(size = 7))
print(HT.plot)

```

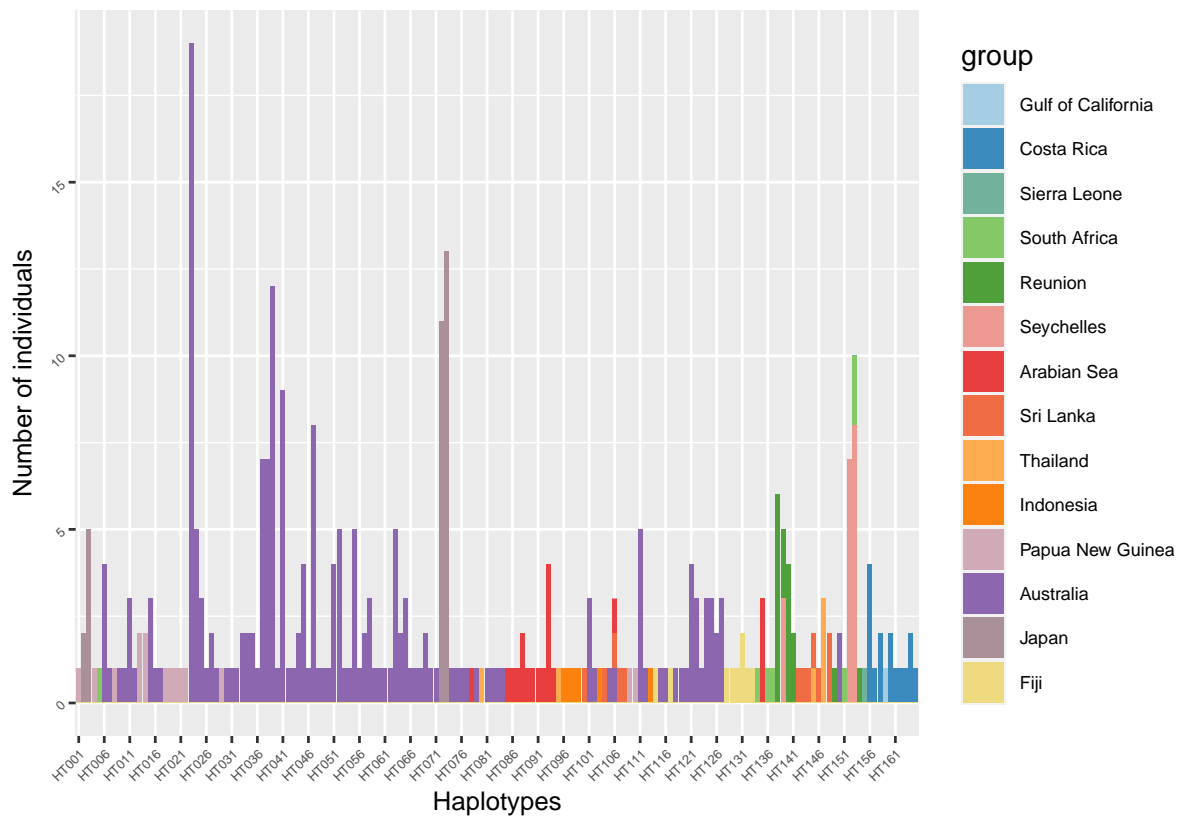

```
ggplot2::ggsave(HT.plot, filename = "HT_barplot_per_Sites.png", width = 30,
  height = 15, units = "cm")
```

```
## [1] "Gulf of California"
## [1] "Mitogenome base composition:"
##      A      T      G      C
## 0.3151972 0.2423535 0.1307236 0.3117256
## [1] "Costa Rica"
## [1] "Mitogenome base composition:"
##      A      T      G      C
## 0.3151516 0.2424022 0.1307582 0.3116879
## [1] "Sierra Leone"
## [1] "Mitogenome base composition:"
##      A      T      G      C
## 0.3145576 0.2423680 0.1312702 0.3118041
## [1] "South Africa"
## [1] "Mitogenome base composition:"
##      A      T      G      C
## 0.3148254 0.2429858 0.1309720 0.3112168
## [1] "Reunion"
## [1] "Mitogenome base composition:"
##      A      T      G      C
## 0.3148585 0.2431229 0.1309273 0.3110912
## [1] "Seychelles"
## [1] "Mitogenome base composition:"
##      A      T      G      C
## 0.3149296 0.2427989 0.1309067 0.3113648
## [1] "Arabian Sea"
## [1] "Mitogenome base composition:"
##      A      T      G      C
```



```

## 0.3146861 0.2433287 0.1310578 0.3109275
## [1] "Sri Lanka"
## [1] "Mitogenome base composition:"
##      A      T      G      C
## 0.3147039 0.2430626 0.1310614 0.3111722
## [1] "Thailand"
## [1] "Mitogenome base composition:"
##      A      T      G      C
## 0.3147902 0.2430688 0.1310021 0.3111388
## [1] "Indonesia"
## [1] "Mitogenome base composition:"
##      A      T      G      C
## 0.3145539 0.2432308 0.1311531 0.3110621
## [1] "Papua New Guinea"
## [1] "Mitogenome base composition:"
##      A      T      G      C
## 0.3145063 0.2429284 0.1312395 0.3113257
## [1] "Australia"
## [1] "Mitogenome base composition:"
##      A      T      G      C
## 0.3145112 0.2430699 0.1312364 0.3111825
## [1] "Japan"
## [1] "Mitogenome base composition:"
##      A      T      G      C
## 0.3146686 0.2430748 0.1311079 0.3111486
## [1] "Fiji"
## [1] "Mitogenome base composition:"
##      A      T      G      C
## 0.3146038 0.2429049 0.1311531 0.3113381

```

Table 58: Nucleotide and haplotype diversity per Site

|     | Site               | pi.strataG | pi.pegas | pi.pegas.var | HT.richness.strataG | h.pegas  | h.pegas.var |
|-----|--------------------|------------|----------|--------------|---------------------|----------|-------------|
| 1   | Gulf of California | NaN        | NaN      | NaN          | 1                   | NaN      | NaN         |
| 11  | Costa Rica         | 0.000269   | 0.000269 | 0e+00        | 9                   | 0.914286 | 0.002208    |
| 12  | Sierra Leone       | NaN        | NaN      | NaN          | 1                   | NaN      | NaN         |
| 13  | South Africa       | NaN        | 0.001950 | 1e-06        | 6                   | 0.952381 | 0.005950    |
| 14  | Reunion            | 0.000289   | 0.000289 | 0e+00        | 6                   | 0.808333 | 0.004289    |
| 15  | Seychelles         | 0.000299   | 0.000299 | 0e+00        | 3                   | 0.660131 | 0.002867    |
| 16  | Arabian Sea        | 0.001792   | 0.001792 | 1e-06        | 13                  | 0.941520 | 0.001170    |
| 17  | Sri Lanka          | 0.003036   | 0.003037 | 3e-06        | 11                  | 0.984848 | 0.000986    |
| 18  | Thailand           | NaN        | 0.002925 | 3e-06        | 4                   | 0.800000 | 0.025926    |
| 19  | Indonesia          | 0.000447   | 0.000447 | 0e+00        | 6                   | 1.000000 | 0.004630    |
| 110 | Papua New Guinea   | 0.000630   | 0.000631 | 0e+00        | 13                  | 0.980952 | 0.000600    |
| 111 | Australia          | 0.000629   | 0.000630 | 0e+00        | 85                  | 0.977711 | 0.000014    |
| 112 | Japan              | 0.000389   | 0.000389 | 0e+00        | 4                   | 0.690323 | 0.001877    |
| 113 | Fiji               | NaN        | 0.001374 | 1e-06        | 8                   | 0.972222 | 0.002578    |

Table 59: Nucleotide divergence within each Site

|    | stratum            | mean     | q.0 | q.0.025 | q.0.5    | q.0.975  | q.1      |
|----|--------------------|----------|-----|---------|----------|----------|----------|
| 13 | Sri Lanka          | 0.003038 | 0   | 3.7e-05 | 0.005210 | 0.005569 | 0.005629 |
| 14 | Thailand           | 0.002926 | 0   | 0.0e+00 | 0.005269 | 0.005428 | 0.005449 |
| 12 | South Africa       | 0.001950 | 0   | 6.0e-05 | 0.001138 | 0.005150 | 0.005150 |
| 1  | Arabian Sea        | 0.001793 | 0   | 0.0e+00 | 0.000240 | 0.006048 | 0.006108 |
| 4  | Fiji               | 0.001374 | 0   | 0.0e+00 | 0.000240 | 0.005509 | 0.005509 |
| 8  | Papua New Guinea   | 0.000631 | 0   | 0.0e+00 | 0.000778 | 0.001257 | 0.001377 |
| 2  | Australia          | 0.000630 | 0   | 0.0e+00 | 0.000599 | 0.001257 | 0.005569 |
| 6  | Indonesia          | 0.000447 | 0   | 0.0e+00 | 0.000240 | 0.001078 | 0.001078 |
| 7  | Japan              | 0.000389 | 0   | 0.0e+00 | 0.000000 | 0.001078 | 0.001078 |
| 10 | Seychelles         | 0.000299 | 0   | 0.0e+00 | 0.000000 | 0.001018 | 0.001018 |
| 9  | Reunion            | 0.000289 | 0   | 0.0e+00 | 0.000120 | 0.001078 | 0.001078 |
| 3  | Costa Rica         | 0.000269 | 0   | 0.0e+00 | 0.000299 | 0.000419 | 0.000419 |
| 5  | Gulf of California | NA       | NA  | NA      | NA       | NA       | NA       |
| 11 | Sierra Leone       | NA       | NA  | NA      | NA       | NA       | NA       |

Table 60: Nucleotide divergence between each Site

|    | strata.1           | strata.2           | dA        | mean     | q.0      | q.0.025  | q.0.5    | q.0.975  | q.1      |
|----|--------------------|--------------------|-----------|----------|----------|----------|----------|----------|----------|
| 86 | Sierra Leone       | South Africa       | 0.008195  | 0.009170 | 0.008982 | 0.008982 | 0.009281 | 0.009281 | 0.009281 |
| 53 | Gulf of California | South Africa       | 0.008178  | 0.009153 | 0.008982 | 0.008982 | 0.009162 | 0.009383 | 0.009401 |
| 50 | Gulf of California | Reunion            | 0.008965  | 0.009109 | 0.009042 | 0.009042 | 0.009162 | 0.009162 | 0.009162 |
| 78 | Reunion            | Sierra Leone       | 0.008965  | 0.009109 | 0.009042 | 0.009042 | 0.009162 | 0.009162 | 0.009162 |
| 34 | Costa Rica         | South Africa       | 0.007999  | 0.009109 | 0.008862 | 0.008862 | 0.009102 | 0.009401 | 0.009401 |
| 4  | Arabian Sea        | Gulf of California | 0.008208  | 0.009105 | 0.008922 | 0.008976 | 0.009102 | 0.009254 | 0.009281 |
| 47 | Gulf of California | Indonesia          | 0.008858  | 0.009082 | 0.008982 | 0.008997 | 0.009102 | 0.009102 | 0.009102 |
| 48 | Gulf of California | Japan              | 0.008874  | 0.009069 | 0.009042 | 0.009042 | 0.009042 | 0.009162 | 0.009162 |
| 49 | Gulf of California | Papua New Guinea   | 0.008750  | 0.009066 | 0.008922 | 0.008922 | 0.009102 | 0.009201 | 0.009222 |
| 31 | Costa Rica         | Reunion            | 0.008786  | 0.009065 | 0.008922 | 0.008922 | 0.009042 | 0.009162 | 0.009162 |
| 2  | Arabian Sea        | Costa Rica         | 0.008030  | 0.009061 | 0.008802 | 0.008868 | 0.009042 | 0.009222 | 0.009281 |
| 28 | Costa Rica         | Indonesia          | 0.008680  | 0.009038 | 0.008862 | 0.008876 | 0.009042 | 0.009102 | 0.009102 |
| 55 | Gulf of California | Thailand           | 0.007569  | 0.009032 | 0.008922 | 0.008930 | 0.009042 | 0.009147 | 0.009162 |
| 29 | Costa Rica         | Japan              | 0.008696  | 0.009025 | 0.008922 | 0.008922 | 0.009042 | 0.009162 | 0.009162 |
| 10 | Arabian Sea        | Sierra Leone       | 0.008127  | 0.009023 | 0.008802 | 0.008856 | 0.008982 | 0.009281 | 0.009281 |
| 30 | Costa Rica         | Papua New Guinea   | 0.008572  | 0.009022 | 0.008802 | 0.008838 | 0.009042 | 0.009222 | 0.009222 |
| 37 | Fiji               | Gulf of California | 0.008335  | 0.009022 | 0.008982 | 0.008982 | 0.009042 | 0.009042 | 0.009042 |
| 51 | Gulf of California | Seychelles         | 0.008862  | 0.009012 | 0.008982 | 0.008982 | 0.008982 | 0.009162 | 0.009162 |
| 54 | Gulf of California | Sri Lanka          | 0.007493  | 0.009012 | 0.008922 | 0.008922 | 0.008982 | 0.009145 | 0.009162 |
| 82 | Seychelles         | Sierra Leone       | 0.008862  | 0.009012 | 0.008982 | 0.008982 | 0.008982 | 0.009162 | 0.009162 |
| 88 | Sierra Leone       | Thailand           | 0.007529  | 0.008992 | 0.008802 | 0.008825 | 0.009042 | 0.009042 | 0.009042 |
| 36 | Costa Rica         | Thailand           | 0.007390  | 0.008988 | 0.008802 | 0.008816 | 0.008982 | 0.009162 | 0.009162 |
| 26 | Costa Rica         | Fiji               | 0.008156  | 0.008978 | 0.008862 | 0.008862 | 0.008982 | 0.009042 | 0.009042 |
| 32 | Costa Rica         | Seychelles         | 0.008684  | 0.008968 | 0.008862 | 0.008862 | 0.008982 | 0.009162 | 0.009162 |
| 35 | Costa Rica         | Sri Lanka          | 0.007315  | 0.008968 | 0.008802 | 0.008802 | 0.008982 | 0.009162 | 0.009162 |
| 16 | Australia          | Gulf of California | 0.008652  | 0.008966 | 0.008743 | 0.008743 | 0.008922 | 0.009222 | 0.009281 |
| 60 | Indonesia          | Sierra Leone       | 0.008739  | 0.008962 | 0.008862 | 0.008877 | 0.008982 | 0.008982 | 0.008982 |
| 87 | Sierra Leone       | Sri Lanka          | 0.007443  | 0.008962 | 0.008802 | 0.008802 | 0.008982 | 0.009145 | 0.009162 |
| 67 | Japan              | Sierra Leone       | 0.008754  | 0.008949 | 0.008922 | 0.008922 | 0.008922 | 0.009042 | 0.009042 |
| 73 | Papua New Guinea   | Sierra Leone       | 0.008631  | 0.008946 | 0.008802 | 0.008802 | 0.008982 | 0.009081 | 0.009102 |
| 14 | Australia          | Costa Rica         | 0.008473  | 0.008922 | 0.008623 | 0.008683 | 0.008922 | 0.009162 | 0.009281 |
| 43 | Fiji               | Sierra Leone       | 0.008215  | 0.008902 | 0.008862 | 0.008862 | 0.008922 | 0.008922 | 0.008922 |
| 22 | Australia          | Sierra Leone       | 0.008528  | 0.008843 | 0.008623 | 0.008626 | 0.008862 | 0.009102 | 0.009162 |
| 52 | Gulf of California | Sierra Leone       | 0.006347  | 0.006347 | 0.006347 | 0.006347 | 0.006347 | 0.006347 | 0.006347 |
| 33 | Costa Rica         | Sierra Leone       | 0.006169  | 0.006303 | 0.006228 | 0.006228 | 0.006287 | 0.006347 | 0.006347 |
| 65 | Japan              | Reunion            | 0.005288  | 0.005628 | 0.005269 | 0.005269 | 0.005629 | 0.005988 | 0.005988 |
| 71 | Papua New Guinea   | Reunion            | 0.005129  | 0.005589 | 0.005210 | 0.005328 | 0.005569 | 0.005988 | 0.005988 |
| 58 | Indonesia          | Reunion            | 0.005198  | 0.005566 | 0.005210 | 0.005254 | 0.005569 | 0.005808 | 0.005808 |
| 20 | Australia          | Reunion            | 0.005076  | 0.005535 | 0.000240 | 0.005210 | 0.005569 | 0.005868 | 0.005928 |
| 66 | Japan              | Seychelles         | 0.005016  | 0.005361 | 0.005210 | 0.005210 | 0.005210 | 0.005988 | 0.005988 |
| 72 | Papua New Guinea   | Seychelles         | 0.004874  | 0.005339 | 0.005150 | 0.005150 | 0.005269 | 0.005689 | 0.005988 |
| 59 | Indonesia          | Seychelles         | 0.004926  | 0.005299 | 0.005150 | 0.005150 | 0.005269 | 0.005728 | 0.005808 |
| 21 | Australia          | Seychelles         | 0.004802  | 0.005267 | 0.000180 | 0.005030 | 0.005269 | 0.005749 | 0.005928 |
| 41 | Fiji               | Reunion            | 0.004197  | 0.005029 | 0.000359 | 0.000958 | 0.005509 | 0.005629 | 0.005629 |
| 68 | Japan              | South Africa       | 0.003843  | 0.005013 | 0.001557 | 0.001557 | 0.005569 | 0.006108 | 0.006108 |
| 61 | Indonesia          | South Africa       | 0.003760  | 0.004959 | 0.001497 | 0.001617 | 0.005389 | 0.005928 | 0.005928 |
| 74 | Papua New Guinea   | South Africa       | 0.003614  | 0.004905 | 0.000659 | 0.000778 | 0.005389 | 0.006000 | 0.006108 |
| 23 | Australia          | South Africa       | 0.003602  | 0.004892 | 0.000180 | 0.001198 | 0.005389 | 0.005988 | 0.006048 |
| 8  | Arabian Sea        | Reunion            | 0.003841  | 0.004882 | 0.000240 | 0.000240 | 0.005689 | 0.005954 | 0.005988 |
| 42 | Fiji               | Seychelles         | 0.003973  | 0.004809 | 0.000299 | 0.000299 | 0.005329 | 0.005629 | 0.005629 |
| 9  | Arabian Sea        | Seychelles         | 0.003704  | 0.004750 | 0.000359 | 0.000768 | 0.005389 | 0.005837 | 0.005988 |
| 44 | Fiji               | South Africa       | 0.002900  | 0.004562 | 0.000299 | 0.000365 | 0.005389 | 0.005749 | 0.005749 |
| 11 | Arabian Sea        | South Africa       | 0.002625  | 0.004496 | 0.000120 | 0.000120 | 0.005449 | 0.006048 | 0.006108 |
| 76 | Papua New Guinea   | Thailand           | 0.002145  | 0.003923 | 0.000240 | 0.000359 | 0.005329 | 0.005735 | 0.005749 |
| 25 | Australia          | Thailand           | 0.002064  | 0.003842 | 0.000180 | 0.000419 | 0.005329 | 0.005569 | 0.005629 |
| 70 | Japan              | Thailand           | 0.002138  | 0.003795 | 0.000359 | 0.000359 | 0.005269 | 0.005749 | 0.005749 |
| 63 | Indonesia          | Thailand           | 0.002059  | 0.003746 | 0.000299 | 0.000404 | 0.005210 | 0.005569 | 0.005569 |
| 46 | Fiji               | Thailand           | 0.001570  | 0.003720 | 0.000060 | 0.000359 | 0.005419 | 0.005509 | 0.005509 |
| 13 | Arabian Sea        | Thailand           | 0.001218  | 0.003578 | 0.000120 | 0.000120 | 0.005389 | 0.005769 | 0.005868 |
| 75 | Papua New Guinea   | Sri Lanka          | 0.001691  | 0.003525 | 0.000240 | 0.000299 | 0.005329 | 0.005689 | 0.005868 |
| 24 | Australia          | Sri Lanka          | 0.001608  | 0.003442 | 0.000000 | 0.000299 | 0.005269 | 0.005629 | 0.005808 |
| 45 | Fiji               | Sri Lanka          | 0.001195  | 0.003401 | 0.000060 | 0.000340 | 0.005269 | 0.005509 | 0.005509 |
| 69 | Japan              | Sri Lanka          | 0.001680  | 0.003394 | 0.000359 | 0.000359 | 0.005210 | 0.005808 | 0.005868 |
| 12 | Arabian Sea        | Sri Lanka          | 0.000915  | 0.003330 | 0.000000 | 0.000359 | 0.005329 | 0.005749 | 0.005808 |
| 62 | Indonesia          | Sri Lanka          | 0.001544  | 0.003286 | 0.000120 | 0.000166 | 0.005180 | 0.005582 | 0.005689 |
| 89 | South Africa       | Sri Lanka          | 0.000372  | 0.002866 | 0.000240 | 0.000240 | 0.001317 | 0.005864 | 0.005868 |
| 80 | Reunion            | Sri Lanka          | 0.001188  | 0.002852 | 0.000299 | 0.000406 | 0.001018 | 0.005749 | 0.005749 |
| 91 | Sri Lanka          | Thailand           | -0.000246 | 0.002736 | 0.000000 | 0.000060 | 0.000958 | 0.005509 | 0.005569 |
| 90 | South Africa       | Thailand           | 0.000109  | 0.002548 | 0.000240 | 0.000241 | 0.001198 | 0.005868 | 0.005868 |
| 84 | Seychelles         | Sri Lanka          | 0.000860  | 0.002528 | 0.000240 | 0.000240 | 0.000928 | 0.005689 | 0.005749 |
| 81 | Reunion            | Thailand           | 0.000885  | 0.002493 | 0.000299 | 0.000359 | 0.001078 | 0.005749 | 0.005749 |
| 3  | Arabian Sea        | Fiji               | 0.000483  | 0.002066 | 0.000719 | 0.000838 | 0.001018 | 0.005749 | 0.005749 |
| 85 | Seychelles         | Thailand           | 0.000443  | 0.002056 | 0.000240 | 0.000240 | 0.000299 | 0.005668 | 0.005749 |
| 7  | Arabian Sea        | Papua New Guinea   | 0.000524  | 0.001735 | 0.000240 | 0.000359 | 0.001078 | 0.005808 | 0.006108 |
| 1  | Arabian Sea        | Australia          | 0.000441  | 0.001652 | 0.000000 | 0.000359 | 0.000898 | 0.005868 | 0.006048 |
| 6  | Arabian Sea        | Japan              | 0.000391  | 0.001482 | 0.000359 | 0.000359 | 0.000539 | 0.006108 | 0.006108 |
| 39 | Fiji               | Japan              | 0.000596  | 0.001477 | 0.000838 | 0.000838 | 0.000958 | 0.005407 | 0.005749 |
| 40 | Fiji               | Papua New Guinea   | 0.000446  | 0.001448 | 0.000599 | 0.000659 | 0.000958 | 0.005449 | 0.005749 |
| 5  | Arabian Sea        | Indonesia          | 0.000316  | 0.001436 | 0.000120 | 0.000240 | 0.000599 | 0.005731 | 0.005928 |
| 38 | Fiji               | Indonesia          | 0.000511  | 0.001422 | 0.000719 | 0.000719 | 0.000958 | 0.005449 | 0.005569 |
| 15 | Australia          | Fiji               | 0.000337  | 0.001339 | 0.000180 | 0.000240 | 0.000838 | 0.005509 | 0.005689 |
| 79 | Reunion            | South Africa       | 0.000134  | 0.001254 | 0.000060 | 0.000153 | 0.000898 | 0.005030 | 0.005030 |
| 83 | Seychelles         | South Africa       | 0.000063  | 0.001188 | 0.000000 | 0.000000 | 0.001078 | 0.004611 | 0.005030 |
| 57 | Indonesia          | Papua New Guinea   | 0.000438  | 0.000977 | 0.000299 | 0.000419 | 0.001078 | 0.001198 | 0.001257 |
| 64 | Japan              | Papua New Guinea   | 0.000450  | 0.000960 | 0.000359 | 0.000359 | 0.001018 | 0.001257 | 0.001377 |
| 18 | Australia          | Japan              | 0.000401  | 0.000910 | 0.000299 | 0.000359 | 0.000898 | 0.001257 | 0.005629 |
| 17 | Australia          | Indonesia          | 0.000342  | 0.000880 | 0.000060 | 0.000265 | 0.000898 | 0.001257 | 0.005449 |
| 19 | Australia          | Papua New Guinea   | 0.000176  | 0.000807 | 0.000120 | 0.000240 | 0.000719 | 0.001198 | 0.005629 |
| 77 | Reunion            | Seychelles         | 0.000453  | 0.000747 | 0.000000 | 0.000000 | 0.000898 | 0.001018 | 0.001078 |
| 56 | Indonesia          | Japan              | 0.000271  | 0.000690 | 0.000419 | 0.000419 | 0.000539 | 0.001257 | 0.001257 |
| 27 | Costa Rica         | Gulf of California | 0.000173  | 0.000307 | 0.000240 | 0.000240 | 0.000299 | 0.000419 | 0.000419 |

Table 61: Haplotype counts per Site according to pegas

|      | GOC | COR | SIL | SAF | RUN | SEY | ARS | SRL | TAI | IND | PNG | AUS | JAP | FIJ |
|------|-----|-----|-----|-----|-----|-----|-----|-----|-----|-----|-----|-----|-----|-----|
| HT01 | 0   | 0   | 0   | 1   | 0   | 0   | 0   | 0   | 0   | 0   | 0   | 0   | 0   | 0   |
| HT02 | 0   | 0   | 0   | 1   | 0   | 0   | 0   | 0   | 0   | 0   | 0   | 0   | 0   | 0   |
| HT03 | 0   | 0   | 0   | 1   | 0   | 0   | 0   | 0   | 0   | 0   | 0   | 0   | 0   | 0   |
| HT04 | 0   | 0   | 0   | 0   | 1   | 0   | 0   | 0   | 0   | 0   | 0   | 0   | 0   | 0   |
| HT05 | 0   | 0   | 0   | 0   | 0   | 0   | 0   | 0   | 3   | 0   | 0   | 0   | 0   | 0   |
| HT06 | 0   | 0   | 0   | 0   | 0   | 0   | 0   | 2   | 0   | 0   | 0   | 0   | 0   | 0   |
| HT07 | 0   | 0   | 0   | 0   | 0   | 0   | 0   | 1   | 0   | 0   | 0   | 0   | 0   | 0   |
| HT08 | 0   | 0   | 0   | 0   | 1   | 0   | 0   | 0   | 0   | 0   | 0   | 0   | 0   | 0   |
| HT09 | 0   | 0   | 0   | 1   | 0   | 0   | 0   | 0   | 0   | 0   | 0   | 0   | 0   | 0   |
| HT10 | 0   | 0   | 0   | 2   | 0   | 8   | 0   | 0   | 0   | 0   | 0   | 0   | 0   | 0   |
| HT11 | 0   | 0   | 0   | 0   | 0   | 7   | 0   | 0   | 0   | 0   | 0   | 0   | 0   | 0   |
| HT12 | 0   | 0   | 0   | 0   | 0   | 0   | 0   | 0   | 0   | 0   | 0   | 2   | 0   | 0   |
| HT13 | 0   | 0   | 0   | 0   | 0   | 0   | 0   | 1   | 0   | 0   | 0   | 0   | 0   | 0   |
| HT14 | 0   | 0   | 0   | 0   | 0   | 0   | 0   | 1   | 0   | 0   | 0   | 0   | 0   | 0   |
| HT15 | 0   | 0   | 0   | 0   | 6   | 0   | 0   | 0   | 0   | 0   | 0   | 0   | 0   | 0   |
| HT16 | 0   | 0   | 0   | 0   | 2   | 3   | 0   | 0   | 0   | 0   | 0   | 0   | 0   | 0   |
| HT17 | 0   | 0   | 0   | 0   | 2   | 0   | 0   | 0   | 0   | 0   | 0   | 0   | 0   | 0   |
| HT18 | 0   | 0   | 0   | 0   | 4   | 0   | 0   | 0   | 0   | 0   | 0   | 0   | 0   | 0   |
| HT19 | 0   | 0   | 0   | 0   | 0   | 0   | 0   | 0   | 0   | 0   | 0   | 0   | 0   | 1   |
| HT20 | 0   | 0   | 0   | 0   | 0   | 0   | 0   | 1   | 0   | 0   | 0   | 0   | 0   | 0   |
| HT21 | 0   | 0   | 0   | 0   | 0   | 0   | 0   | 1   | 1   | 0   | 0   | 0   | 0   | 0   |
| HT22 | 0   | 0   | 0   | 0   | 0   | 0   | 3   | 0   | 0   | 0   | 0   | 0   | 0   | 0   |
| HT23 | 0   | 0   | 0   | 0   | 0   | 0   | 0   | 0   | 0   | 0   | 0   | 3   | 0   | 0   |
| HT24 | 0   | 0   | 0   | 0   | 0   | 0   | 0   | 0   | 0   | 0   | 0   | 4   | 0   | 0   |
| HT25 | 0   | 0   | 0   | 0   | 0   | 0   | 0   | 0   | 0   | 0   | 0   | 1   | 0   | 0   |
| HT26 | 0   | 0   | 0   | 0   | 0   | 0   | 0   | 0   | 0   | 0   | 0   | 1   | 0   | 0   |
| HT27 | 0   | 0   | 0   | 0   | 0   | 0   | 0   | 0   | 0   | 0   | 0   | 1   | 0   | 0   |
| HT28 | 0   | 0   | 0   | 0   | 0   | 0   | 0   | 0   | 0   | 1   | 0   | 0   | 0   | 0   |
| HT29 | 0   | 0   | 0   | 0   | 0   | 0   | 0   | 0   | 0   | 0   | 0   | 2   | 0   | 0   |
| HT30 | 0   | 0   | 0   | 0   | 0   | 0   | 0   | 0   | 0   | 0   | 0   | 5   | 0   | 0   |
| HT31 | 0   | 0   | 0   | 0   | 0   | 0   | 0   | 0   | 0   | 0   | 0   | 3   | 0   | 0   |
| HT32 | 0   | 0   | 0   | 0   | 0   | 0   | 0   | 0   | 0   | 0   | 1   | 0   | 0   | 0   |
| HT33 | 0   | 0   | 0   | 0   | 0   | 0   | 0   | 0   | 0   | 0   | 0   | 1   | 0   | 0   |
| HT34 | 0   | 0   | 0   | 0   | 0   | 0   | 0   | 0   | 0   | 0   | 0   | 7   | 0   | 0   |
| HT35 | 0   | 0   | 0   | 0   | 0   | 0   | 0   | 0   | 0   | 0   | 0   | 1   | 0   | 0   |
| HT36 | 0   | 0   | 0   | 0   | 0   | 0   | 0   | 0   | 0   | 0   | 0   | 3   | 0   | 0   |
| HT37 | 0   | 0   | 0   | 0   | 0   | 0   | 0   | 0   | 0   | 0   | 0   | 2   | 0   | 0   |
| HT38 | 0   | 0   | 0   | 0   | 0   | 0   | 0   | 0   | 0   | 0   | 0   | 2   | 0   | 0   |
| HT39 | 0   | 0   | 0   | 0   | 0   | 0   | 0   | 0   | 0   | 0   | 0   | 2   | 0   | 0   |
| HT40 | 0   | 0   | 0   | 0   | 0   | 0   | 0   | 0   | 0   | 0   | 0   | 2   | 0   | 0   |
| HT41 | 0   | 0   | 0   | 0   | 0   | 0   | 0   | 0   | 0   | 0   | 0   | 1   | 0   | 0   |
| HT42 | 0   | 0   | 0   | 0   | 0   | 0   | 0   | 0   | 0   | 0   | 0   | 1   | 0   | 0   |
| HT43 | 0   | 0   | 0   | 0   | 0   | 0   | 0   | 0   | 0   | 0   | 0   | 1   | 0   | 0   |
| HT44 | 0   | 0   | 0   | 0   | 0   | 0   | 0   | 0   | 0   | 0   | 0   | 5   | 0   | 0   |
| HT45 | 0   | 0   | 0   | 0   | 0   | 0   | 0   | 0   | 0   | 0   | 0   | 4   | 0   | 0   |
| HT46 | 0   | 0   | 0   | 0   | 0   | 0   | 0   | 0   | 0   | 0   | 0   | 9   | 0   | 0   |
| HT47 | 0   | 0   | 0   | 0   | 0   | 0   | 0   | 0   | 0   | 0   | 0   | 1   | 0   | 0   |
| HT48 | 0   | 0   | 0   | 0   | 0   | 0   | 0   | 0   | 0   | 0   | 0   | 1   | 0   | 0   |
| HT49 | 0   | 0   | 0   | 0   | 0   | 0   | 0   | 0   | 0   | 0   | 0   | 1   | 0   | 0   |
| HT50 | 0   | 0   | 0   | 0   | 0   | 0   | 0   | 0   | 0   | 0   | 0   | 12  | 0   | 0   |
| HT51 | 0   | 0   | 0   | 0   | 0   | 0   | 0   | 0   | 0   | 0   | 0   | 7   | 0   | 0   |
| HT52 | 0   | 0   | 0   | 0   | 0   | 0   | 0   | 0   | 0   | 0   | 0   | 1   | 0   | 0   |
| HT53 | 0   | 0   | 0   | 0   | 0   | 0   | 0   | 0   | 0   | 0   | 0   | 1   | 0   | 0   |
| HT54 | 0   | 0   | 0   | 0   | 0   | 0   | 0   | 0   | 0   | 0   | 0   | 1   | 0   | 0   |
| HT55 | 0   | 0   | 0   | 0   | 0   | 0   | 0   | 0   | 0   | 0   | 0   | 19  | 0   | 0   |
| HT56 | 0   | 0   | 0   | 0   | 0   | 0   | 0   | 0   | 0   | 0   | 0   | 8   | 0   | 0   |
| HT57 | 0   | 0   | 0   | 0   | 0   | 0   | 0   | 0   | 0   | 0   | 0   | 1   | 0   | 0   |
| HT58 | 0   | 0   | 0   | 0   | 0   | 0   | 0   | 0   | 0   | 0   | 0   | 1   | 0   | 0   |
| HT59 | 0   | 0   | 0   | 0   | 0   | 0   | 0   | 0   | 0   | 0   | 0   | 1   | 0   | 0   |
| HT60 | 0   | 0   | 0   | 0   | 0   | 0   | 0   | 0   | 0   | 0   | 0   | 2   | 0   | 0   |
| HT61 | 0   | 0   | 0   | 0   | 0   | 0   | 0   | 0   | 0   | 0   | 0   | 1   | 0   | 0   |
| HT62 | 0   | 0   | 0   | 0   | 0   | 0   | 0   | 0   | 0   | 0   | 0   | 1   | 0   | 0   |
| HT63 | 0   | 0   | 0   | 0   | 0   | 0   | 0   | 0   | 0   | 0   | 0   | 1   | 0   | 0   |
| HT64 | 0   | 0   | 0   | 0   | 0   | 0   | 1   | 0   | 0   | 0   | 0   | 0   | 0   | 0   |
| HT65 | 0   | 0   | 0   | 0   | 0   | 0   | 1   | 0   | 0   | 0   | 0   | 0   | 0   | 0   |
| HT66 | 0   | 0   | 0   | 0   | 0   | 0   | 0   | 0   | 0   | 0   | 0   | 1   | 0   | 0   |
| HT67 | 0   | 0   | 0   | 0   | 0   | 0   | 1   | 0   | 0   | 0   | 0   | 0   | 0   | 0   |
| HT68 | 0   | 0   | 0   | 0   | 0   | 0   | 0   | 0   | 0   | 0   | 0   | 3   | 0   | 0   |
| HT69 | 0   | 0   | 0   | 0   | 0   | 0   | 2   | 0   | 0   | 0   | 0   | 0   | 0   | 0   |
| HT70 | 0   | 0   | 0   | 0   | 0   | 0   | 1   | 0   | 0   | 0   | 0   | 0   | 0   | 0   |
| HT71 | 0   | 0   | 0   | 0   | 0   | 0   | 1   | 0   | 0   | 0   | 0   | 0   | 0   | 0   |
| HT72 | 0   | 0   | 0   | 0   | 0   | 0   | 1   | 0   | 0   | 0   | 0   | 0   | 0   | 0   |
| HT73 | 0   | 0   | 0   | 0   | 0   | 0   | 0   | 0   | 1   | 0   | 0   | 0   | 0   | 0   |
| HT74 | 0   | 0   | 0   | 0   | 0   | 0   | 0   | 0   | 0   | 0   | 1   | 0   | 0   | 0   |
| HT75 | 0   | 0   | 0   | 0   | 0   | 0   | 0   | 0   | 0   | 0   | 1   | 0   | 0   | 0   |
| HT76 | 0   | 0   | 0   | 0   | 0   | 0   | 0   | 0   | 0   | 0   | 0   | 1   | 0   | 0   |
| HT77 | 0   | 0   | 0   | 0   | 0   | 0   | 0   | 0   | 0   | 0   | 0   | 5   | 0   | 0   |
| HT78 | 0   | 0   | 0   | 0   | 0   | 0   | 1   | 0   | 0   | 0   | 0   | 0   | 0   | 0   |
| HT79 | 0   | 0   | 0   | 0   | 0   | 0   | 4   | 0   | 0   | 0   | 0   | 0   | 0   | 0   |
| HT80 | 0   | 0   | 0   | 0   | 0   | 0   | 1   | 0   | 0   | 0   | 0   | 0   | 0   | 0   |
| HT81 | 0   | 0   | 0   | 0   | 0   | 0   | 0   | 0   | 0   | 0   | 0   | 1   | 0   | 0   |
| HT82 | 0   | 0   | 0   | 0   | 0   | 0   | 0   | 0   | 0   | 0   | 0   | 1   | 0   | 0   |
| HT83 | 0   | 0   | 0   | 0   | 0   | 0   | 1   | 0   | 0   | 0   | 0   | 0   | 0   | 0   |
| HT84 | 0   | 0   | 0   | 0   | 0   | 0   | 0   | 0   | 0   | 0   | 0   | 1   | 0   | 0   |

Table 61: Haplotype counts per Site according to pegas (continued)

|       | GOC | COR | SIL | SAF | RUN | SEY | ARS | SRL | TAI | IND | PNG | AUS | JAP | FIJ |
|-------|-----|-----|-----|-----|-----|-----|-----|-----|-----|-----|-----|-----|-----|-----|
| HT85  | 0   | 0   | 0   | 0   | 0   | 0   | 0   | 0   | 0   | 0   | 0   | 3   | 0   | 0   |
| HT86  | 0   | 0   | 0   | 0   | 0   | 0   | 0   | 0   | 0   | 0   | 0   | 3   | 0   | 0   |
| HT87  | 0   | 0   | 0   | 0   | 0   | 0   | 0   | 0   | 0   | 0   | 0   | 2   | 0   | 0   |
| HT88  | 0   | 0   | 0   | 0   | 0   | 0   | 0   | 0   | 0   | 0   | 0   | 1   | 0   | 0   |
| HT89  | 0   | 0   | 0   | 0   | 0   | 0   | 0   | 0   | 0   | 0   | 0   | 0   | 0   | 1   |
| HT90  | 0   | 0   | 0   | 0   | 0   | 0   | 0   | 0   | 0   | 0   | 0   | 0   | 0   | 1   |
| HT91  | 0   | 0   | 0   | 0   | 0   | 0   | 0   | 0   | 0   | 0   | 0   | 0   | 0   | 1   |
| HT92  | 0   | 0   | 0   | 0   | 0   | 0   | 0   | 0   | 0   | 0   | 0   | 1   | 0   | 0   |
| HT93  | 0   | 0   | 0   | 0   | 0   | 0   | 0   | 0   | 0   | 0   | 0   | 4   | 0   | 0   |
| HT94  | 0   | 0   | 0   | 0   | 0   | 0   | 0   | 0   | 0   | 0   | 0   | 3   | 0   | 0   |
| HT95  | 0   | 0   | 0   | 0   | 0   | 0   | 0   | 0   | 0   | 0   | 0   | 1   | 0   | 0   |
| HT96  | 0   | 0   | 0   | 0   | 0   | 0   | 0   | 0   | 0   | 0   | 0   | 1   | 0   | 0   |
| HT97  | 0   | 0   | 0   | 0   | 0   | 0   | 0   | 0   | 0   | 0   | 0   | 0   | 0   | 1   |
| HT98  | 0   | 0   | 0   | 0   | 0   | 0   | 0   | 0   | 0   | 0   | 0   | 0   | 0   | 2   |
| HT99  | 0   | 0   | 0   | 0   | 0   | 0   | 0   | 0   | 0   | 0   | 0   | 0   | 0   | 1   |
| HT100 | 0   | 0   | 0   | 0   | 0   | 0   | 0   | 0   | 0   | 0   | 0   | 0   | 0   | 1   |
| HT101 | 0   | 0   | 0   | 0   | 0   | 0   | 0   | 0   | 0   | 0   | 0   | 1   | 0   | 0   |
| HT102 | 0   | 0   | 0   | 0   | 0   | 0   | 0   | 0   | 0   | 0   | 0   | 2   | 0   | 0   |
| HT103 | 0   | 0   | 0   | 0   | 0   | 0   | 0   | 0   | 0   | 0   | 0   | 1   | 0   | 0   |
| HT104 | 0   | 0   | 0   | 0   | 0   | 0   | 0   | 0   | 0   | 0   | 0   | 1   | 0   | 0   |
| HT105 | 0   | 0   | 0   | 0   | 0   | 0   | 0   | 0   | 0   | 0   | 0   | 5   | 0   | 0   |
| HT106 | 0   | 0   | 0   | 0   | 0   | 0   | 0   | 0   | 0   | 0   | 0   | 2   | 0   | 0   |
| HT107 | 0   | 0   | 0   | 0   | 0   | 0   | 0   | 0   | 0   | 0   | 0   | 1   | 0   | 0   |
| HT108 | 0   | 0   | 0   | 1   | 0   | 0   | 0   | 0   | 0   | 0   | 0   | 0   | 0   | 0   |
| HT109 | 0   | 0   | 0   | 0   | 0   | 0   | 0   | 0   | 0   | 0   | 0   | 1   | 0   | 0   |
| HT110 | 0   | 0   | 0   | 0   | 0   | 0   | 0   | 0   | 0   | 0   | 1   | 0   | 0   | 0   |
| HT111 | 0   | 0   | 0   | 0   | 0   | 0   | 0   | 0   | 0   | 0   | 1   | 0   | 0   | 0   |
| HT112 | 0   | 0   | 0   | 0   | 0   | 0   | 0   | 0   | 0   | 0   | 0   | 1   | 0   | 0   |
| HT113 | 0   | 0   | 0   | 0   | 0   | 0   | 0   | 0   | 0   | 0   | 1   | 0   | 0   | 0   |
| HT114 | 0   | 0   | 0   | 0   | 0   | 0   | 0   | 0   | 0   | 0   | 1   | 0   | 0   | 0   |
| HT115 | 0   | 0   | 0   | 0   | 0   | 0   | 0   | 0   | 0   | 0   | 2   | 0   | 0   | 0   |
| HT116 | 0   | 0   | 0   | 0   | 0   | 0   | 0   | 0   | 0   | 0   | 2   | 0   | 0   | 0   |
| HT117 | 0   | 0   | 0   | 0   | 0   | 0   | 0   | 0   | 0   | 0   | 0   | 3   | 0   | 0   |
| HT118 | 0   | 0   | 0   | 0   | 0   | 0   | 0   | 0   | 0   | 0   | 0   | 1   | 0   | 0   |
| HT119 | 0   | 0   | 0   | 0   | 0   | 0   | 0   | 0   | 0   | 0   | 1   | 0   | 0   | 0   |
| HT120 | 0   | 0   | 0   | 0   | 0   | 0   | 0   | 0   | 0   | 0   | 0   | 1   | 0   | 0   |
| HT121 | 0   | 0   | 0   | 0   | 0   | 0   | 0   | 0   | 0   | 0   | 0   | 1   | 0   | 0   |
| HT122 | 0   | 0   | 0   | 0   | 0   | 0   | 0   | 0   | 0   | 0   | 1   | 0   | 0   | 0   |
| HT123 | 0   | 0   | 0   | 0   | 0   | 0   | 0   | 0   | 0   | 0   | 1   | 0   | 0   | 0   |
| HT124 | 0   | 0   | 0   | 0   | 0   | 0   | 0   | 0   | 0   | 0   | 0   | 0   | 5   | 0   |
| HT125 | 0   | 0   | 0   | 0   | 0   | 0   | 0   | 0   | 0   | 0   | 0   | 0   | 2   | 0   |
| HT126 | 0   | 0   | 0   | 0   | 0   | 0   | 0   | 0   | 0   | 0   | 0   | 1   | 0   | 0   |
| HT127 | 0   | 0   | 0   | 0   | 0   | 0   | 0   | 0   | 0   | 0   | 0   | 5   | 0   | 0   |
| HT128 | 0   | 0   | 0   | 0   | 0   | 0   | 0   | 0   | 0   | 0   | 0   | 4   | 0   | 0   |
| HT129 | 0   | 0   | 0   | 0   | 0   | 0   | 0   | 0   | 0   | 0   | 0   | 1   | 0   | 0   |
| HT130 | 0   | 0   | 0   | 0   | 0   | 0   | 0   | 0   | 0   | 0   | 0   | 1   | 0   | 0   |
| HT131 | 0   | 0   | 0   | 0   | 0   | 0   | 0   | 0   | 0   | 1   | 0   | 0   | 0   | 0   |
| HT132 | 0   | 0   | 0   | 0   | 0   | 0   | 0   | 0   | 0   | 1   | 0   | 0   | 0   | 0   |
| HT133 | 0   | 0   | 0   | 0   | 0   | 0   | 0   | 1   | 0   | 0   | 0   | 0   | 0   | 0   |
| HT134 | 0   | 0   | 0   | 0   | 0   | 0   | 0   | 0   | 0   | 0   | 0   | 1   | 0   | 0   |
| HT135 | 0   | 0   | 0   | 0   | 0   | 0   | 0   | 0   | 0   | 0   | 0   | 1   | 0   | 0   |
| HT136 | 0   | 0   | 0   | 0   | 0   | 0   | 0   | 0   | 0   | 0   | 0   | 3   | 0   | 0   |
| HT137 | 0   | 0   | 0   | 0   | 0   | 0   | 1   | 1   | 0   | 0   | 0   | 1   | 0   | 0   |
| HT138 | 0   | 0   | 0   | 0   | 0   | 0   | 0   | 1   | 0   | 0   | 0   | 0   | 0   | 0   |
| HT139 | 0   | 0   | 0   | 0   | 0   | 0   | 0   | 0   | 0   | 0   | 0   | 1   | 0   | 0   |
| HT140 | 0   | 0   | 0   | 0   | 0   | 0   | 0   | 1   | 0   | 0   | 0   | 0   | 0   | 0   |
| HT141 | 0   | 0   | 0   | 0   | 0   | 0   | 0   | 1   | 0   | 0   | 0   | 0   | 0   | 0   |
| HT142 | 0   | 0   | 0   | 0   | 0   | 0   | 0   | 0   | 0   | 0   | 0   | 1   | 0   | 0   |
| HT143 | 0   | 0   | 0   | 0   | 0   | 0   | 0   | 0   | 0   | 1   | 0   | 0   | 0   | 0   |
| HT144 | 0   | 0   | 0   | 0   | 0   | 0   | 0   | 0   | 0   | 1   | 0   | 0   | 0   | 0   |
| HT145 | 0   | 0   | 0   | 0   | 0   | 0   | 0   | 0   | 0   | 1   | 0   | 0   | 0   | 0   |
| HT146 | 0   | 0   | 0   | 0   | 0   | 0   | 0   | 0   | 0   | 0   | 0   | 1   | 0   | 0   |
| HT147 | 0   | 0   | 0   | 0   | 0   | 0   | 0   | 0   | 0   | 0   | 0   | 1   | 0   | 0   |
| HT148 | 0   | 0   | 0   | 0   | 0   | 0   | 0   | 0   | 0   | 0   | 0   | 1   | 0   | 0   |
| HT149 | 0   | 0   | 0   | 0   | 0   | 0   | 0   | 0   | 0   | 0   | 0   | 1   | 0   | 0   |
| HT150 | 0   | 0   | 0   | 0   | 0   | 0   | 0   | 0   | 0   | 0   | 0   | 3   | 0   | 0   |
| HT151 | 0   | 0   | 0   | 0   | 0   | 0   | 0   | 0   | 0   | 0   | 1   | 0   | 0   | 0   |
| HT152 | 0   | 0   | 0   | 0   | 0   | 0   | 0   | 0   | 0   | 0   | 0   | 0   | 11  | 0   |
| HT153 | 0   | 0   | 0   | 0   | 0   | 0   | 0   | 0   | 0   | 0   | 0   | 0   | 13  | 0   |
| HT154 | 0   | 0   | 0   | 0   | 0   | 0   | 0   | 0   | 1   | 0   | 0   | 0   | 0   | 0   |
| HT155 | 0   | 4   | 0   | 0   | 0   | 0   | 0   | 0   | 0   | 0   | 0   | 0   | 0   | 0   |
| HT156 | 0   | 2   | 0   | 0   | 0   | 0   | 0   | 0   | 0   | 0   | 0   | 0   | 0   | 0   |
| HT157 | 0   | 1   | 0   | 0   | 0   | 0   | 0   | 0   | 0   | 0   | 0   | 0   | 0   | 0   |
| HT158 | 0   | 2   | 0   | 0   | 0   | 0   | 0   | 0   | 0   | 0   | 0   | 0   | 0   | 0   |
| HT159 | 0   | 1   | 0   | 0   | 0   | 0   | 0   | 0   | 0   | 0   | 0   | 0   | 0   | 0   |
| HT160 | 0   | 1   | 0   | 0   | 0   | 0   | 0   | 0   | 0   | 0   | 0   | 0   | 0   | 0   |
| HT161 | 0   | 1   | 0   | 0   | 0   | 0   | 0   | 0   | 0   | 0   | 0   | 0   | 0   | 0   |
| HT162 | 1   | 0   | 0   | 0   | 0   | 0   | 0   | 0   | 0   | 0   | 0   | 0   | 0   | 0   |
| HT163 | 0   | 2   | 0   | 0   | 0   | 0   | 0   | 0   | 0   | 0   | 0   | 0   | 0   | 0   |
| HT164 | 0   | 1   | 0   | 0   | 0   | 0   | 0   | 0   | 0   | 0   | 0   | 0   | 0   | 0   |
| HT165 | 0   | 0   | 1   | 0   | 0   | 0   | 0   | 0   | 0   | 0   | 0   | 0   | 0   | 0   |

### 13.3.4 Diversity per region

```
strata <- as.character(BS.gt@schemes$Region)
strata[strata %in% c("W-IO", "N-IO", "E-IO", "W-PAC")] <- "IWP"
names(strata) <- as.character(BS.gt@schemes$id)
strataG::setStrata(BS.gt) <- strata

divers.region <- data.frame(Region = character(), pi.strataG = numeric(),
                             pi.pegas = numeric(), pi.pegas.var = numeric(),
                             HT.richness.strataG = numeric(), h.pegas = numeric(),
                             h.pegas.var = numeric())

strat.levels <- c("E-PAC", "E-ATL", "IWP", "Japan", "Fiji")
for (Region in strat.levels) {
  print(Region)
  BS.gt.sub <- BS.gt[,Region, drop = TRUE]
  BS.bin.sub <- subset(BS.bin, names(BS.bin) %in% BS.gt.sub@data$id)
  BS.h.sub <- strataG::labelHaplotypes(BS.bin.sub, prefix = "HT",
                                       use.indels = TRUE)
  BS.dna.sub <- as.dna(BS.dna[names(BS.dna) %in% BS.gt.sub@data$id, ,
                           drop = TRUE])

  bases <- haplotypes::basecomp(BS.dna.sub)
  print(paste0("Mitogenome base composition:"))
  print(colMeans(bases))

  pi.gt <- strataG::nucleotideDiversity(BS.gt.sub,
                                       bases = c("a", "c", "g", "t"),
                                       simplify = TRUE)
  pi.peg <- pegas::nuc.div(BS.bin.sub, variance = TRUE,
                          pairwise.deletion = FALSE)
  h.peg <- pegas::hap.div(BS.bin.sub, variance = TRUE, method = "Nei")
  res <- data.frame(Region, mean(pi.gt), pi.peg[1], pi.peg[2],
                   length(unique(BS.h.sub$haps)), h.peg[1], h.peg[2])
  colnames(res) <- c("Region", "pi.strataG", "pi.pegas", "pi.pegas.var",
                    "HT.richness.strataG", "h.pegas", "h.pegas.var")
  divers.region <- rbind(divers.region, res)
}

knitr::kable(
  divers.region,
  caption = "Nucleotide and haplotype diversity per region",
  # format = "html",
  digits = 6
) %>%
kableExtra::kable_styling(full_width = FALSE, font_size = 5)

dA.gt <- strataG::nucleotideDivergence(BS.gt,
                                       probs = c(0, 0.025, 0.5, 0.975, 1),
                                       model = "RAW")

knitr::kable(
  dA.gt$within[order(dA.gt$within$mean, decreasing = TRUE), -1],
  # format = "html",
  caption = "Nucleotide divergence within each region"
) %>%
kableExtra::kable_styling(full_width = FALSE, font_size = 5)

knitr::kable(
  dA.gt$between[order(dA.gt$between$mean, decreasing = TRUE), -1],
```

```

# format = "html",
caption = "Nucleotide divergence between each region"
) %>%
kableExtra::kable_styling(full_width = FALSE, font_size = 5)

hapcount <- pegas::haploFreq(BS.dna@sequence, fac = BS.gt@schemes$Region,
                           split = NULL, what = 1, haplo = NULL)
row.names(hapcount) <- paste0("HT", sprintf('%0.2d', 1:BS.hap@nhap))

kableExtra::kbl(hapcount,
  caption = "Haplotype counts per region according to pegas",
  longtable = TRUE, booktabs = TRUE) %>%
kableExtra::kable_styling(full_width = FALSE, font_size = 5,
  latex_options = c("repeat_header", "hold_position"))

group.levels <- levels(BS.gi$other$ind.meta$Region)
group.names <- BS.gi$other$ind.meta$Region

HTs <- paste0("HT", sprintf('%0.3d', 1:BS.hap@nhap))
df <- data.frame(group = NULL, nind = NULL, hap = NULL, nhap = NULL,
  hapfreq = NULL, stringsAsFactors = FALSE)
for (k in 1:length(group.levels)) {
  group.inds <- adegenet::indNames(BS.gi)[group.names == group.levels[k]]
  for (i in 1:BS.hap@nhap) {
    group <- group.levels[k]
    nind <- length(group.inds)
    hap <- HTs[i]
    nhap <- sum(group.inds %in% BS.hap@haplist[[i]])
    hapfreq <- nhap/nind
    df <- plyr::rbind.fill(df, data.frame(group = group, nind = nind, hap = hap,
      nhap = nhap, hapfreq = hapfreq,
      stringsAsFactors = FALSE))
  }
}
df$group <- factor(df$group, levels = group.levels)

haplotype.labels <- unique(df$hap)
haplotype.labels2 <- haplotype.labels[seq(1, length(haplotype.labels), by = 5)]

HT.plot <- ggplot2::ggplot(data = df) +
  ggplot2::geom_bar(ggplot2::aes(x = hap, y = nhap, fill = group),
    stat = "identity", position = "stack") +
  ggplot2::labs(x = "Haplotypes", y = "Number of individuals") +
  ggplot2::scale_fill_manual(values = colours.8) +
  ggplot2::scale_x_discrete(breaks = haplotype.labels2) +
  ggplot2::theme(
    axis.text = ggplot2::element_text(angle = 45, hjust = 1, size = 5),
    axis.title.x = ggplot2::element_text(size = 10),
    axis.title.y = ggplot2::element_text(size = 10),
    legend.text = ggplot2::element_text(size = 7))
print(HT.plot)

```

Table 62: Nucleotide and haplotype diversity per region

|    | Region | pi.strataG | pi.pegas | pi.pegas.var | HT.richness.strataG | h.pegas  | h.pegas.var |
|----|--------|------------|----------|--------------|---------------------|----------|-------------|
| 1  | E-PAC  | 0.000274   | 0.000274 | 0e+00        | 10                  | 0.925000 | 0.001807    |
| 11 | E-ATL  | NaN        | NaN      | NaN          | 1                   | NaN      | NaN         |
| 12 | IWP    | 0.002089   | 0.002090 | 1e-06        | 142                 | 0.987349 | 0.000003    |
| 13 | Japan  | 0.000389   | 0.000389 | 0e+00        | 4                   | 0.690323 | 0.001877    |
| 14 | Fiji   | NaN        | 0.001374 | 1e-06        | 8                   | 0.972222 | 0.002578    |

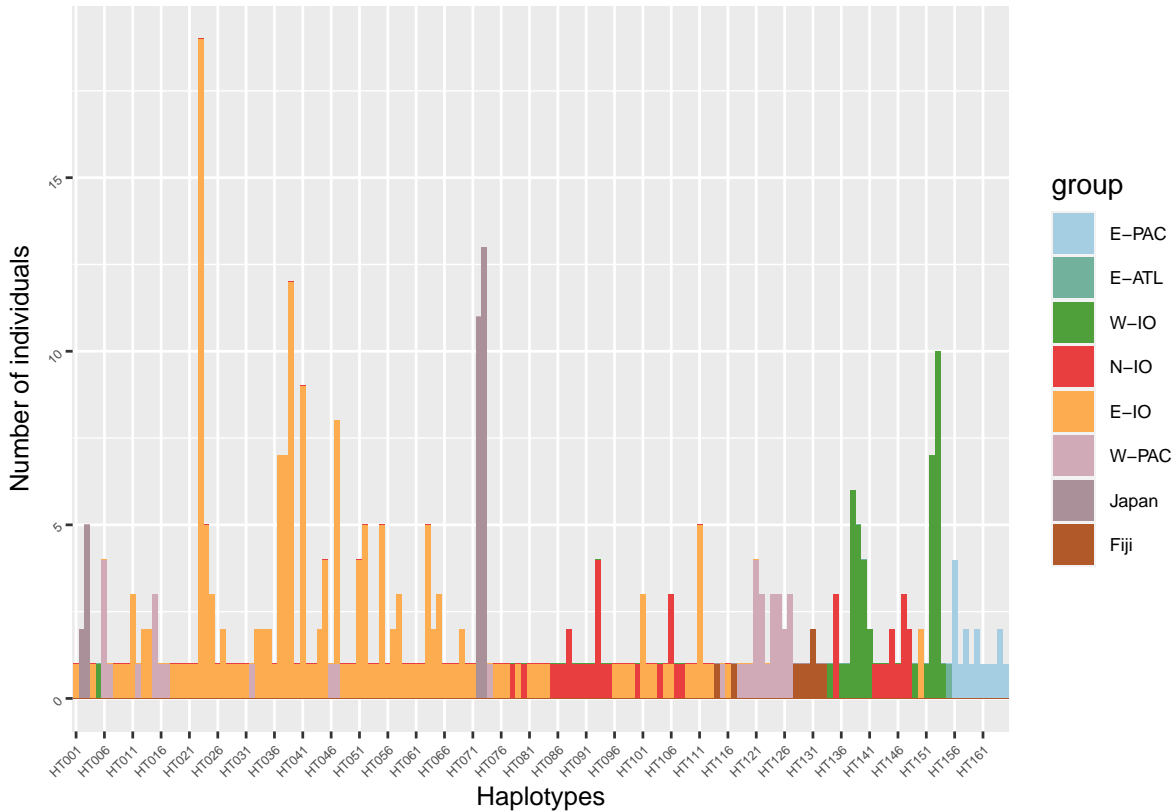

```
ggplot2::ggsave(HT.plot, filename = "HT_barplot_per_Region.png", width = 30,
height = 15, units = "cm")
```

```
## [1] "E-PAC"
## [1] "Mitogenome base composition:"
##      A      T      G      C
## 0.3151545 0.2423992 0.1307560 0.3116903
## [1] "E-ATL"
## [1] "Mitogenome base composition:"
##      A      T      G      C
## 0.3145576 0.2423680 0.1312702 0.3118041
## [1] "IWP"
## [1] "Mitogenome base composition:"
##      A      T      G      C
## 0.3145866 0.2430667 0.1311699 0.3111767
## [1] "Japan"
## [1] "Mitogenome base composition:"
##      A      T      G      C
## 0.3146686 0.2430748 0.1311079 0.3111486
## [1] "Fiji"
## [1] "Mitogenome base composition:"
##      A      T      G      C
## 0.3146038 0.2429049 0.1311531 0.3113381
```

Table 63: Nucleotide divergence within each region

|   | stratum | mean      | q.0 | q.0.025  | q.0.5     | q.0.975   | q.1       |
|---|---------|-----------|-----|----------|-----------|-----------|-----------|
| 4 | IWP     | 0.0020900 | 0   | 5.99e-05 | 0.0008982 | 0.0058084 | 0.0061078 |
| 3 | Fiji    | 0.0013739 | 0   | 0.00e+00 | 0.0002395 | 0.0055090 | 0.0055090 |
| 5 | Japan   | 0.0003894 | 0   | 0.00e+00 | 0.0000000 | 0.0010778 | 0.0010778 |
| 2 | E-PAC   | 0.0002740 | 0   | 0.00e+00 | 0.0002994 | 0.0004192 | 0.0004192 |
| 1 | E-ATL   | NA        | NA  | NA       | NA        | NA        | NA        |

Table 64: Nucleotide divergence between each region

|    | strata.1 | strata.2 | dA        | mean      | q.0       | q.0.025   | q.0.5     | q.0.975   | q.1       |
|----|----------|----------|-----------|-----------|-----------|-----------|-----------|-----------|-----------|
| 7  | E-PAC    | Japan    | 0.0086961 | 0.0090278 | 0.0089222 | 0.0089222 | 0.0090419 | 0.0091617 | 0.0091617 |
| 5  | E-PAC    | Fiji     | 0.0081569 | 0.0089808 | 0.0088623 | 0.0088623 | 0.0089820 | 0.0090419 | 0.0090419 |
| 6  | E-PAC    | IWP      | 0.0077769 | 0.0089588 | 0.0086228 | 0.0087425 | 0.0089222 | 0.0092216 | 0.0094012 |
| 4  | E-ATL    | Japan    | 0.0087545 | 0.0089492 | 0.0089222 | 0.0089222 | 0.0089222 | 0.0090419 | 0.0090419 |
| 2  | E-ATL    | Fiji     | 0.0082152 | 0.0089022 | 0.0088623 | 0.0088623 | 0.0089222 | 0.0089222 | 0.0089222 |
| 3  | E-ATL    | IWP      | 0.0078560 | 0.0089009 | 0.0086228 | 0.0086826 | 0.0088623 | 0.0091617 | 0.0092814 |
| 1  | E-ATL    | E-PAC    | 0.0061692 | 0.0063061 | 0.0062275 | 0.0062275 | 0.0063174 | 0.0063473 | 0.0063473 |
| 8  | Fiji     | IWP      | 0.0002662 | 0.0019981 | 0.0000599 | 0.0002395 | 0.0008982 | 0.0056287 | 0.0057485 |
| 10 | IWP      | Japan    | 0.0004710 | 0.0017107 | 0.0002994 | 0.0003593 | 0.0008982 | 0.0057485 | 0.0061078 |
| 9  | Fiji     | Japan    | 0.0005956 | 0.0014773 | 0.0008383 | 0.0008383 | 0.0009581 | 0.0054072 | 0.0057485 |

Table 65: Haplotype counts per region according to pegas

|      | E-PAC | E-ATL | W-IO | N-IO | E-IO | W-PAC | Japan | Fiji |
|------|-------|-------|------|------|------|-------|-------|------|
| HT01 | 0     | 0     | 1    | 0    | 0    | 0     | 0     | 0    |
| HT02 | 0     | 0     | 1    | 0    | 0    | 0     | 0     | 0    |
| HT03 | 0     | 0     | 1    | 0    | 0    | 0     | 0     | 0    |
| HT04 | 0     | 0     | 1    | 0    | 0    | 0     | 0     | 0    |
| HT05 | 0     | 0     | 0    | 3    | 0    | 0     | 0     | 0    |
| HT06 | 0     | 0     | 0    | 2    | 0    | 0     | 0     | 0    |
| HT07 | 0     | 0     | 0    | 1    | 0    | 0     | 0     | 0    |
| HT08 | 0     | 0     | 1    | 0    | 0    | 0     | 0     | 0    |
| HT09 | 0     | 0     | 1    | 0    | 0    | 0     | 0     | 0    |
| HT10 | 0     | 0     | 10   | 0    | 0    | 0     | 0     | 0    |
| HT11 | 0     | 0     | 7    | 0    | 0    | 0     | 0     | 0    |
| HT12 | 0     | 0     | 0    | 0    | 2    | 0     | 0     | 0    |
| HT13 | 0     | 0     | 0    | 1    | 0    | 0     | 0     | 0    |
| HT14 | 0     | 0     | 0    | 1    | 0    | 0     | 0     | 0    |
| HT15 | 0     | 0     | 6    | 0    | 0    | 0     | 0     | 0    |
| HT16 | 0     | 0     | 5    | 0    | 0    | 0     | 0     | 0    |
| HT17 | 0     | 0     | 2    | 0    | 0    | 0     | 0     | 0    |
| HT18 | 0     | 0     | 4    | 0    | 0    | 0     | 0     | 0    |
| HT19 | 0     | 0     | 0    | 0    | 0    | 0     | 0     | 1    |
| HT20 | 0     | 0     | 0    | 1    | 0    | 0     | 0     | 0    |
| HT21 | 0     | 0     | 0    | 2    | 0    | 0     | 0     | 0    |
| HT22 | 0     | 0     | 0    | 3    | 0    | 0     | 0     | 0    |
| HT23 | 0     | 0     | 0    | 0    | 0    | 3     | 0     | 0    |
| HT24 | 0     | 0     | 0    | 0    | 0    | 4     | 0     | 0    |
| HT25 | 0     | 0     | 0    | 0    | 1    | 0     | 0     | 0    |
| HT26 | 0     | 0     | 0    | 0    | 0    | 1     | 0     | 0    |
| HT27 | 0     | 0     | 0    | 0    | 1    | 0     | 0     | 0    |
| HT28 | 0     | 0     | 0    | 0    | 1    | 0     | 0     | 0    |
| HT29 | 0     | 0     | 0    | 0    | 2    | 0     | 0     | 0    |
| HT30 | 0     | 0     | 0    | 0    | 5    | 0     | 0     | 0    |
| HT31 | 0     | 0     | 0    | 0    | 3    | 0     | 0     | 0    |
| HT32 | 0     | 0     | 0    | 0    | 1    | 0     | 0     | 0    |
| HT33 | 0     | 0     | 0    | 0    | 1    | 0     | 0     | 0    |
| HT34 | 0     | 0     | 0    | 0    | 7    | 0     | 0     | 0    |
| HT35 | 0     | 0     | 0    | 0    | 1    | 0     | 0     | 0    |
| HT36 | 0     | 0     | 0    | 0    | 3    | 0     | 0     | 0    |
| HT37 | 0     | 0     | 0    | 0    | 2    | 0     | 0     | 0    |
| HT38 | 0     | 0     | 0    | 0    | 2    | 0     | 0     | 0    |
| HT39 | 0     | 0     | 0    | 0    | 2    | 0     | 0     | 0    |
| HT40 | 0     | 0     | 0    | 0    | 2    | 0     | 0     | 0    |
| HT41 | 0     | 0     | 0    | 0    | 1    | 0     | 0     | 0    |
| HT42 | 0     | 0     | 0    | 0    | 1    | 0     | 0     | 0    |
| HT43 | 0     | 0     | 0    | 0    | 1    | 0     | 0     | 0    |
| HT44 | 0     | 0     | 0    | 0    | 5    | 0     | 0     | 0    |
| HT45 | 0     | 0     | 0    | 0    | 4    | 0     | 0     | 0    |
| HT46 | 0     | 0     | 0    | 0    | 9    | 0     | 0     | 0    |
| HT47 | 0     | 0     | 0    | 0    | 1    | 0     | 0     | 0    |
| HT48 | 0     | 0     | 0    | 0    | 1    | 0     | 0     | 0    |
| HT49 | 0     | 0     | 0    | 0    | 1    | 0     | 0     | 0    |
| HT50 | 0     | 0     | 0    | 0    | 12   | 0     | 0     | 0    |
| HT51 | 0     | 0     | 0    | 0    | 7    | 0     | 0     | 0    |
| HT52 | 0     | 0     | 0    | 0    | 1    | 0     | 0     | 0    |
| HT53 | 0     | 0     | 0    | 0    | 1    | 0     | 0     | 0    |
| HT54 | 0     | 0     | 0    | 0    | 1    | 0     | 0     | 0    |
| HT55 | 0     | 0     | 0    | 0    | 19   | 0     | 0     | 0    |
| HT56 | 0     | 0     | 0    | 0    | 7    | 1     | 0     | 0    |
| HT57 | 0     | 0     | 0    | 0    | 1    | 0     | 0     | 0    |
| HT58 | 0     | 0     | 0    | 0    | 1    | 0     | 0     | 0    |



Table 65: Haplotype counts per region according to pegas (continued)

|       | E-PAC | E-ATL | W-IO | N-IO | E-IO | W-PAC | Japan | Fiji |
|-------|-------|-------|------|------|------|-------|-------|------|
| HT59  | 0     | 0     | 0    | 0    | 1    | 0     | 0     | 0    |
| HT60  | 0     | 0     | 0    | 0    | 2    | 0     | 0     | 0    |
| HT61  | 0     | 0     | 0    | 0    | 1    | 0     | 0     | 0    |
| HT62  | 0     | 0     | 0    | 0    | 1    | 0     | 0     | 0    |
| HT63  | 0     | 0     | 0    | 0    | 1    | 0     | 0     | 0    |
| HT64  | 0     | 0     | 0    | 1    | 0    | 0     | 0     | 0    |
| HT65  | 0     | 0     | 0    | 1    | 0    | 0     | 0     | 0    |
| HT66  | 0     | 0     | 0    | 0    | 1    | 0     | 0     | 0    |
| HT67  | 0     | 0     | 0    | 1    | 0    | 0     | 0     | 0    |
| HT68  | 0     | 0     | 0    | 0    | 3    | 0     | 0     | 0    |
| HT69  | 0     | 0     | 0    | 2    | 0    | 0     | 0     | 0    |
| HT70  | 0     | 0     | 0    | 1    | 0    | 0     | 0     | 0    |
| HT71  | 0     | 0     | 0    | 1    | 0    | 0     | 0     | 0    |
| HT72  | 0     | 0     | 0    | 1    | 0    | 0     | 0     | 0    |
| HT73  | 0     | 0     | 0    | 1    | 0    | 0     | 0     | 0    |
| HT74  | 0     | 0     | 0    | 0    | 1    | 0     | 0     | 0    |
| HT75  | 0     | 0     | 0    | 0    | 1    | 0     | 0     | 0    |
| HT76  | 0     | 0     | 0    | 0    | 1    | 0     | 0     | 0    |
| HT77  | 0     | 0     | 0    | 0    | 5    | 0     | 0     | 0    |
| HT78  | 0     | 0     | 0    | 1    | 0    | 0     | 0     | 0    |
| HT79  | 0     | 0     | 0    | 4    | 0    | 0     | 0     | 0    |
| HT80  | 0     | 0     | 0    | 1    | 0    | 0     | 0     | 0    |
| HT81  | 0     | 0     | 0    | 0    | 1    | 0     | 0     | 0    |
| HT82  | 0     | 0     | 0    | 0    | 1    | 0     | 0     | 0    |
| HT83  | 0     | 0     | 0    | 1    | 0    | 0     | 0     | 0    |
| HT84  | 0     | 0     | 0    | 0    | 0    | 1     | 0     | 0    |
| HT85  | 0     | 0     | 0    | 0    | 0    | 3     | 0     | 0    |
| HT86  | 0     | 0     | 0    | 0    | 0    | 3     | 0     | 0    |
| HT87  | 0     | 0     | 0    | 0    | 0    | 2     | 0     | 0    |
| HT88  | 0     | 0     | 0    | 0    | 0    | 1     | 0     | 0    |
| HT89  | 0     | 0     | 0    | 0    | 0    | 0     | 0     | 1    |
| HT90  | 0     | 0     | 0    | 0    | 0    | 0     | 0     | 1    |
| HT91  | 0     | 0     | 0    | 0    | 0    | 0     | 0     | 1    |
| HT92  | 0     | 0     | 0    | 0    | 0    | 1     | 0     | 0    |
| HT93  | 0     | 0     | 0    | 0    | 0    | 4     | 0     | 0    |
| HT94  | 0     | 0     | 0    | 0    | 0    | 3     | 0     | 0    |
| HT95  | 0     | 0     | 0    | 0    | 0    | 1     | 0     | 0    |
| HT96  | 0     | 0     | 0    | 0    | 0    | 1     | 0     | 0    |
| HT97  | 0     | 0     | 0    | 0    | 0    | 0     | 0     | 1    |
| HT98  | 0     | 0     | 0    | 0    | 0    | 0     | 0     | 2    |
| HT99  | 0     | 0     | 0    | 0    | 0    | 0     | 0     | 1    |
| HT100 | 0     | 0     | 0    | 0    | 0    | 0     | 0     | 1    |
| HT101 | 0     | 0     | 0    | 0    | 1    | 0     | 0     | 0    |
| HT102 | 0     | 0     | 0    | 0    | 2    | 0     | 0     | 0    |
| HT103 | 0     | 0     | 0    | 0    | 1    | 0     | 0     | 0    |
| HT104 | 0     | 0     | 0    | 0    | 1    | 0     | 0     | 0    |
| HT105 | 0     | 0     | 0    | 0    | 5    | 0     | 0     | 0    |
| HT106 | 0     | 0     | 0    | 0    | 2    | 0     | 0     | 0    |
| HT107 | 0     | 0     | 0    | 0    | 0    | 1     | 0     | 0    |
| HT108 | 0     | 0     | 1    | 0    | 0    | 0     | 0     | 0    |
| HT109 | 0     | 0     | 0    | 0    | 0    | 1     | 0     | 0    |
| HT110 | 0     | 0     | 0    | 0    | 1    | 0     | 0     | 0    |
| HT111 | 0     | 0     | 0    | 0    | 1    | 0     | 0     | 0    |
| HT112 | 0     | 0     | 0    | 0    | 0    | 1     | 0     | 0    |
| HT113 | 0     | 0     | 0    | 0    | 1    | 0     | 0     | 0    |
| HT114 | 0     | 0     | 0    | 0    | 1    | 0     | 0     | 0    |
| HT115 | 0     | 0     | 0    | 0    | 2    | 0     | 0     | 0    |
| HT116 | 0     | 0     | 0    | 0    | 2    | 0     | 0     | 0    |
| HT117 | 0     | 0     | 0    | 0    | 0    | 3     | 0     | 0    |
| HT118 | 0     | 0     | 0    | 0    | 0    | 1     | 0     | 0    |
| HT119 | 0     | 0     | 0    | 0    | 1    | 0     | 0     | 0    |
| HT120 | 0     | 0     | 0    | 0    | 1    | 0     | 0     | 0    |
| HT121 | 0     | 0     | 0    | 0    | 0    | 1     | 0     | 0    |
| HT122 | 0     | 0     | 0    | 0    | 1    | 0     | 0     | 0    |
| HT123 | 0     | 0     | 0    | 0    | 1    | 0     | 0     | 0    |
| HT124 | 0     | 0     | 0    | 0    | 0    | 0     | 5     | 0    |
| HT125 | 0     | 0     | 0    | 0    | 0    | 0     | 2     | 0    |
| HT126 | 0     | 0     | 0    | 0    | 1    | 0     | 0     | 0    |
| HT127 | 0     | 0     | 0    | 0    | 5    | 0     | 0     | 0    |
| HT128 | 0     | 0     | 0    | 0    | 4    | 0     | 0     | 0    |
| HT129 | 0     | 0     | 0    | 0    | 1    | 0     | 0     | 0    |
| HT130 | 0     | 0     | 0    | 0    | 1    | 0     | 0     | 0    |
| HT131 | 0     | 0     | 0    | 0    | 1    | 0     | 0     | 0    |
| HT132 | 0     | 0     | 0    | 0    | 1    | 0     | 0     | 0    |
| HT133 | 0     | 0     | 0    | 1    | 0    | 0     | 0     | 0    |
| HT134 | 0     | 0     | 0    | 0    | 1    | 0     | 0     | 0    |
| HT135 | 0     | 0     | 0    | 0    | 1    | 0     | 0     | 0    |
| HT136 | 0     | 0     | 0    | 0    | 3    | 0     | 0     | 0    |
| HT137 | 0     | 0     | 0    | 2    | 1    | 0     | 0     | 0    |
| HT138 | 0     | 0     | 0    | 1    | 0    | 0     | 0     | 0    |
| HT139 | 0     | 0     | 0    | 0    | 1    | 0     | 0     | 0    |
| HT140 | 0     | 0     | 0    | 1    | 0    | 0     | 0     | 0    |
| HT141 | 0     | 0     | 0    | 1    | 0    | 0     | 0     | 0    |
| HT142 | 0     | 0     | 0    | 0    | 1    | 0     | 0     | 0    |

Table 65: Haplotype counts per region according to pegas (*continued*)

|       | E-PAC | E-ATL | W-IO | N-IO | E-IO | W-PAC | Japan | Fiji |
|-------|-------|-------|------|------|------|-------|-------|------|
| HT143 | 0     | 0     | 0    | 0    | 1    | 0     | 0     | 0    |
| HT144 | 0     | 0     | 0    | 0    | 1    | 0     | 0     | 0    |
| HT145 | 0     | 0     | 0    | 0    | 1    | 0     | 0     | 0    |
| HT146 | 0     | 0     | 0    | 0    | 1    | 0     | 0     | 0    |
| HT147 | 0     | 0     | 0    | 0    | 0    | 1     | 0     | 0    |
| HT148 | 0     | 0     | 0    | 0    | 1    | 0     | 0     | 0    |
| HT149 | 0     | 0     | 0    | 0    | 1    | 0     | 0     | 0    |
| HT150 | 0     | 0     | 0    | 0    | 3    | 0     | 0     | 0    |
| HT151 | 0     | 0     | 0    | 0    | 1    | 0     | 0     | 0    |
| HT152 | 0     | 0     | 0    | 0    | 0    | 0     | 11    | 0    |
| HT153 | 0     | 0     | 0    | 0    | 0    | 0     | 13    | 0    |
| HT154 | 0     | 0     | 0    | 1    | 0    | 0     | 0     | 0    |
| HT155 | 4     | 0     | 0    | 0    | 0    | 0     | 0     | 0    |
| HT156 | 2     | 0     | 0    | 0    | 0    | 0     | 0     | 0    |
| HT157 | 1     | 0     | 0    | 0    | 0    | 0     | 0     | 0    |
| HT158 | 2     | 0     | 0    | 0    | 0    | 0     | 0     | 0    |
| HT159 | 1     | 0     | 0    | 0    | 0    | 0     | 0     | 0    |
| HT160 | 1     | 0     | 0    | 0    | 0    | 0     | 0     | 0    |
| HT161 | 1     | 0     | 0    | 0    | 0    | 0     | 0     | 0    |
| HT162 | 1     | 0     | 0    | 0    | 0    | 0     | 0     | 0    |
| HT163 | 2     | 0     | 0    | 0    | 0    | 0     | 0     | 0    |
| HT164 | 1     | 0     | 0    | 0    | 0    | 0     | 0     | 0    |
| HT165 | 0     | 1     | 0    | 0    | 0    | 0     | 0     | 0    |

## 13.4 Haplotype network

### 13.4.1 Rarefaction

```
hapcount <- pegas::haploFreq(BS.dna@sequence, fac = BS.gt@schemes$Site,  
                             split = NULL, what = 1, haplo = NULL)  
BCI <- t(hapcount)  
  
S <- vegan::specnumber(BCI) ## observed number of HTs  
(raremax <- min(rowSums(BCI)))  
Srare <- vegan::rarefy(BCI, raremax, se = FALSE)  
  
plot(S, Srare, xlab = "Observed No. of HTs", ylab = "Rarefied No. of HTs",  
      xlim = c(0,8),ylim = c(0,5))  
abline(0, 1)
```

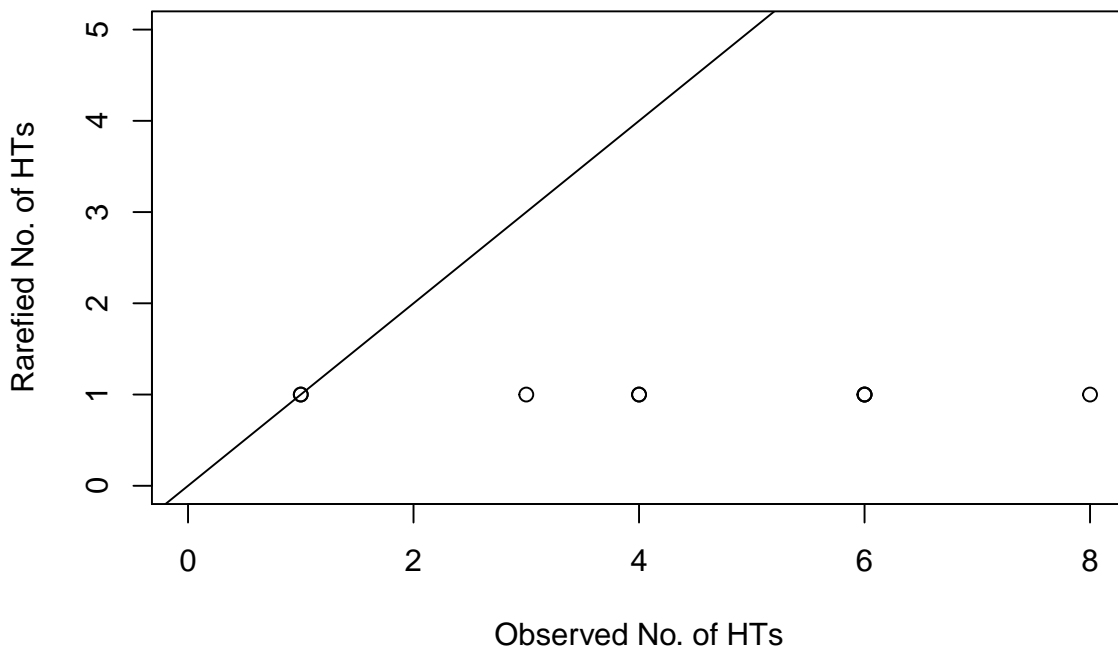

```
# vegan::rarecurve(BCI, step = 5, sample = raremax, col = "blue", cex = 0.6)  
  
## HT accumulation curve based on observed HTs  
sp1 <- vegan::specaccum(BCI)  
sp2 <- vegan::specaccum(BCI, "random")  
plot(sp1, ci.type = "poly", col = "blue", lwd = 2, ci.lty = 0,  
      ci.col = "lightblue")  
boxplot(sp2, col = "yellow", add = TRUE, pch = "+")
```

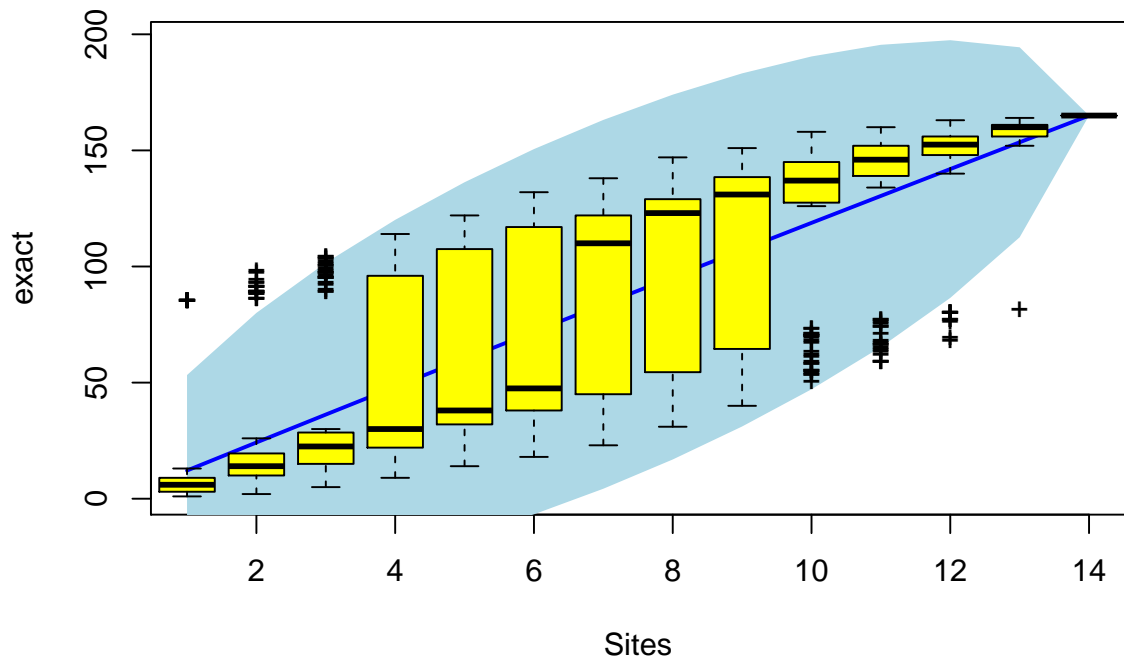

```
## Extrapolated HT richness based on unobserved HTs
pool <- vegan::poolaccum(BCI)
knitr::kable(pool$means,
              # format = "html",
              caption = "Observed and extrapolated HT richness based on resampling") %>%
  kableExtra::kable_styling(full_width = FALSE, font_size = 5)
plot(pool)
```

Table 66: Observed and extrapolated HT richness based on resampling

| N  | S      | Chao     | Jackknife 1 | Jackknife 2 | Bootstrap |
|----|--------|----------|-------------|-------------|-----------|
| 3  | 38.53  | 907.120  | 64.08333    | 76.82833    | 49.89407  |
| 4  | 50.61  | 1466.492 | 88.30500    | 113.32167   | 66.53387  |
| 5  | 60.89  | 1987.694 | 109.14600   | 145.09950   | 80.69728  |
| 6  | 74.24  | 2619.667 | 135.33167   | 183.74100   | 98.86869  |
| 7  | 83.42  | 3050.469 | 153.93714   | 212.07048   | 111.48729 |
| 8  | 95.70  | 3860.636 | 178.16000   | 248.01714   | 128.21404 |
| 9  | 107.10 | 4479.339 | 200.70000   | 281.56556   | 143.74568 |
| 10 | 116.44 | 4786.255 | 219.26500   | 309.37078   | 156.48238 |
| 11 | 128.68 | 5240.840 | 243.35273   | 345.08545   | 173.12754 |
| 12 | 140.01 | 4773.671 | 265.47417   | 377.63098   | 188.48911 |
| 13 | 154.95 | 4540.759 | 294.63923   | 420.50814   | 208.75565 |
| 14 | 165.00 | 4176.583 | 314.50000   | 450.12637   | 222.42879 |

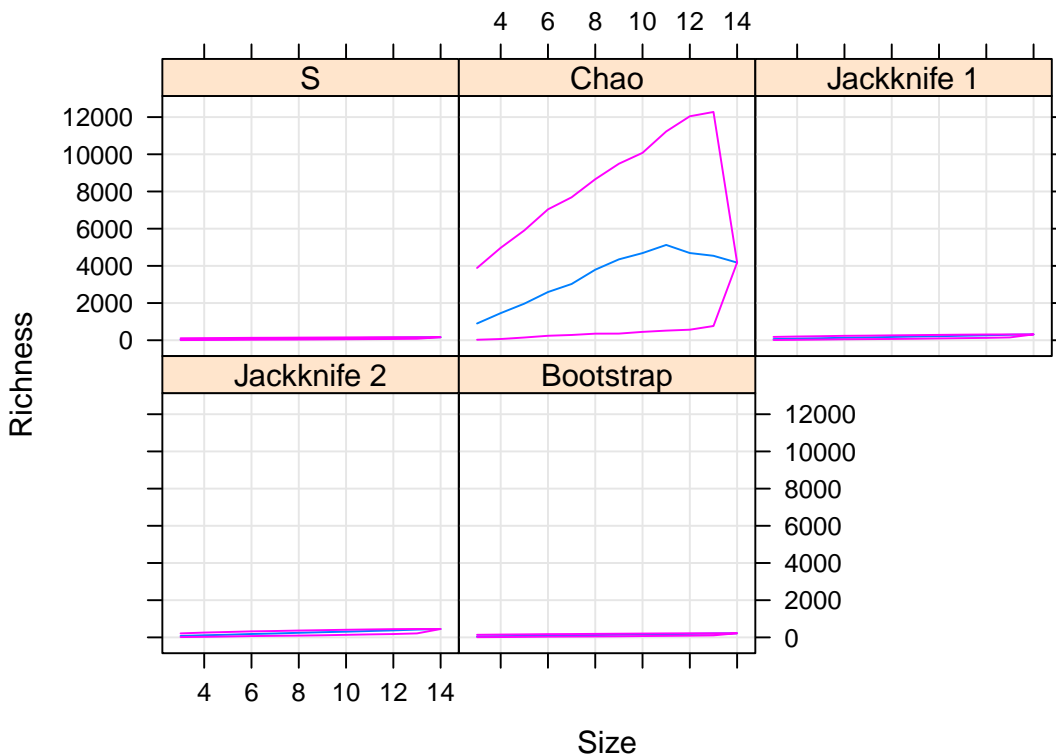

## [1] 1

### 13.4.2 Network

#### 13.4.2.1 Global

```
strata <- as.character(BS.gt@schemes$Site)
names(strata) <- as.character(BS.gt@schemes$id)
strataG::setStrata(BS.gt) <- strata

net <- pegas::haploNet(BS.h)
ind.hap <- with(
  stack(setNames(attr(BS.h, "index"), rownames(BS.h))),
  table(hap = ind, pop = strata[values]))

size.new <- attr(net, "freq")
size.new <- sqrt(size.new)
```

```

# colours.14 <- adegenet::funky(14)
colours.14 <- c("#a6cee3", "#66b6db", "#84bf96", "#f57c7c", "#e42622", "#ffdbb6",
              "#ffb666", "#fe8d19", "#de9e83", "#b6b6db", "#666690", "#977899",
              "#f3e587", "#b15928")

names(colours.14) <- c("Gulf of California", "Costa Rica", "Sierra Leone",
                    "South Africa", "Reunion", "Seychelles", "Arabian Sea",
                    "Sri Lanka", "Thailand", "Indonesia", "Papua New Guinea",
                    "Australia", "Japan", "Fiji")
colours.14.new <- colours.14[order(names(colours.14))]

#### SHAPES #####
df <- as.data.frame(ind.hap)
df2 <- select(df, hap, pop, Freq) %>%
  reshape(., idvar = "hap", timevar = "pop", direction = "wide")
df.rownames <- df2$hap
row.names(df2) <- df.rownames
df2$hap <- NULL
df2 <- sapply(df2, as.integer)
row.names(df2) <- df.rownames
colnames(df2) <- stringr::str_replace_all(string = colnames(df2),
                                         pattern = "Freq.", replacement = "")
res <- colnames(df2)[max.col(df2)]
res2 <- data.frame(HT = row.names(df2), site = res)
res3 <- res2[order(res2$HT),]
shape <- res3$site

tes <- rowSums(df2 > 0)
tes2 <- df2[tes > 1,]
# tes2[,colSums(as.data.frame(tes2) > 0) > 0]

#           Arabian Sea Australia Reunion Seychelles South Africa Sri Lanka Thailand
# HT106           1           1           0           0           0           1           0
# HT139           0           0           2           3           0           0           0
# HT145           0           0           0           0           0           1           1
# HT153           0           0           0           8           2           0           0

shape[shape == "Gulf of California"] <- "square"
shape[shape == "Costa Rica"] <- "circle"
shape[shape == "Sierra Leone"] <- "diamond"
shape[shape == "South Africa"] <- "square"
shape[shape == "Reunion"] <- "square"
shape[shape == "Seychelles"] <- "square"
shape[shape == "Arabian Sea"] <- "circle"
shape[shape == "Sri Lanka"] <- "circle"
shape[shape == "Thailand"] <- "circle"
shape[shape == "Indonesia"] <- "square"
shape[shape == "Papua New Guinea"] <- "diamond"
shape[shape == "Australia"] <- "circle"
shape[shape == "Japan"] <- "square"
shape[shape == "Fiji"] <- "diamond"

names(shape) <- res3$site
shape.leg <- shape[unique(names(shape))]
shape.leg <- shape.leg[order(match(names(shape.leg), names(colours.14)))]
shape.leg[shape.leg == "circle"] <- 16

```

```

shape.leg[shape.leg == "square"] <- 15
shape.leg[shape.leg == "diamond"] <- 18
shape.leg2 <- shape.leg[order(names(shape.leg))]

par(mar = c(1,1,1,1))
plot(net, size = size.new, scale.ratio = 0.2, pie = ind.hap, labels = FALSE,
     shape = shape,
     show.mutation = 0, threshold = 0, srt = 1, cex = 0.75, bg = colours.14.new)
# legend(5, 60, names(colours.14), col = colours.14, pch = 19, ncol = 2,
#       x.intersp = 0.5, y.intersp = 0.5, pt.cex = 2)
legend(5, 60, names(colours.14), col = colours.14, pch = as.numeric(shape.leg),
      ncol = 2, x.intersp = 0.5, y.intersp = 0.5, pt.cex = 2)
title(paste0("HT network of all individuals per Site"))

```

HT network of all individuals per Site

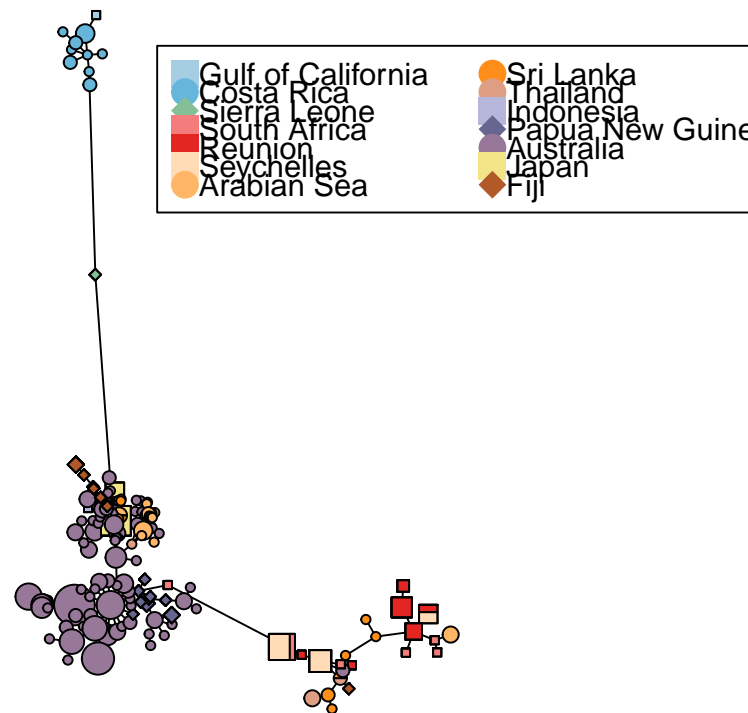

#### 13.4.2.1.1 Per Site

```

dev.print(
  device = png,
  file = "Global_per_Site_HT_network2.png",
  res = 600,
  width = 30,
  height = 30,
  units = "cm")

# xy <- replot()
# plot(net, xy = xy, size = size.new, scale.ratio = 0.2, pie = ind.hap,
#     labels = FALSE,
#     shape = shape,
#     show.mutation = 0, threshold = 0, srt = 1, cex = 0.75, bg = colours.14.new)
# # legend(5, 60, names(colours.14), col = colours.14, pch = 19, ncol = 2,

```

```

# #      x.intersp = 0.5, y.intersp = 0.5, pt.cex = 2)
# legend(5, 60, names(colours.14), col = colours.14, pch = as.numeric(shape.leg),
#       ncol = 2, x.intersp = 0.5, y.intersp = 0.5, pt.cex = 2)
# title(paste0("HT network of all individuals per Site"))
#
#
# dev.print(
# device = png,
# file = "Global_per_Site_HT_network3.png",
# res = 600,
# width = 30,
# height = 30,
# units = "cm")

#####
clust.names <- unlist(BS.hap@haplist[1:132])
strata <- as.character(BS.gt@schemes$Site)
names(strata) <- as.character(BS.gt@schemes$id)
strataG::setStrata(BS.gt) <- strata
BS.gt.clust <- BS.gt[clust.names,, drop = TRUE]

schemes.clust <- BS.gt.clust@schemes[BS.gt.clust@schemes$id %in% clust.names,]
strata <- as.character(schemes.clust$Site)
names(strata) <- as.character(schemes.clust$id)
strataG::setStrata(BS.gt.clust) <- strata

ind.names <- names(BS.dna) %in% BS.gt.clust@data$id
BS.dna.clust <- as.dna(BS.dna[ind.names, , drop = TRUE])
BS.bin.clust <- subset(BS.bin, names(BS.bin) %in% BS.gt.clust@data$id)
BS.haps <- strataG::labelHaplotypes(BS.bin.clust, prefix = "HT",
                                   use.indels = TRUE)

haps <- BS.haps$haps
BS.hap.clust <- haplotypes::haplotype(BS.dna.clust, indels = "sic")

HTs <- unique(haps[names(haps) %in% names(BS.bin.clust)])
BS.h.clust <- pegas::haplotype(BS.bin.clust, HTs)

net <- pegas::haploNet(BS.h.clust)
ind.hap <- with(
  stack(setNames(attr(BS.h.clust, "index"), rownames(BS.h.clust))),
  table(hap = ind, pop = strata[values]))

size.new <- attr(net, "freq")
size.new <- sqrt(size.new)

colours <- colours.14[-c(1:3,5,6)]
colours.new <- colours[order(names(colours))]

### SHAPES
df <- as.data.frame(ind.hap)
df2 <- select(df, hap, pop, Freq) %>%
  reshape(., idvar = "hap", timevar = "pop", direction = "wide")
df.rownames <- df2$hap
row.names(df2) <- df.rownames

```



```

df2$hap <- NULL
df2 <- sapply(df2, as.integer)
row.names(df2) <- df.rownames
colnames(df2) <- stringr::str_replace_all(string = colnames(df2),
                                         pattern = "Freq.", replacement = "")

res <- colnames(df2)[max.col(df2)]
res2 <- data.frame(HT = row.names(df2), site = res)
res3 <- res2[order(res2$HT),]
shape <- res2$site

tes <- rowSums(df2 > 0)
tes2 <- df2[tes > 1,]
#      Arabian Sea      Australia      Sri Lanka
#HT026      1          1          1

shape[shape == "South Africa"] <- "square"
shape[shape == "Arabian Sea"] <- "circle"
shape[shape == "Sri Lanka"] <- "circle"
shape[shape == "Thailand"] <- "circle"
shape[shape == "Indonesia"] <- "square"
shape[shape == "Papua New Guinea"] <- "diamond"
shape[shape == "Australia"] <- "circle"
shape[shape == "Japan"] <- "square"
shape[shape == "Fiji"] <- "diamond"

names(shape) <- res2$site
shape.leg <- shape[unique(names(shape))]
shape.leg <- shape.leg[order(match(names(shape.leg), names(colours)))]
shape.leg[shape.leg == "circle"] <- 16
shape.leg[shape.leg == "square"] <- 15
shape.leg[shape.leg == "diamond"] <- 18

par(mar = c(1,1,1,1))
plot(net, size = size.new, scale.ratio = 0.6, pie = ind.hap, labels = FALSE,
     asp = 1, shape = shape,
     show.mutation = 1, threshold = 0, srt = 1, cex = 0.75, bg = colours.new,
     fast = FALSE)
# legend(-40, 70, names(colours), col = colours, pch = 19, ncol = 2,
#        x.intersp = 0.5, y.intersp = 0.5, pt.cex = 2)
legend(-25, 25, names(colours), col = colours, pch = as.numeric(shape.leg),
      ncol = 2, x.intersp = 0.5, y.intersp = 0.5, pt.cex = 2)
title(paste0("HT network of all E-IO/W-PAC individuals per Site"))

```

## HT network of all E-IO/W-PAC individuals per Site

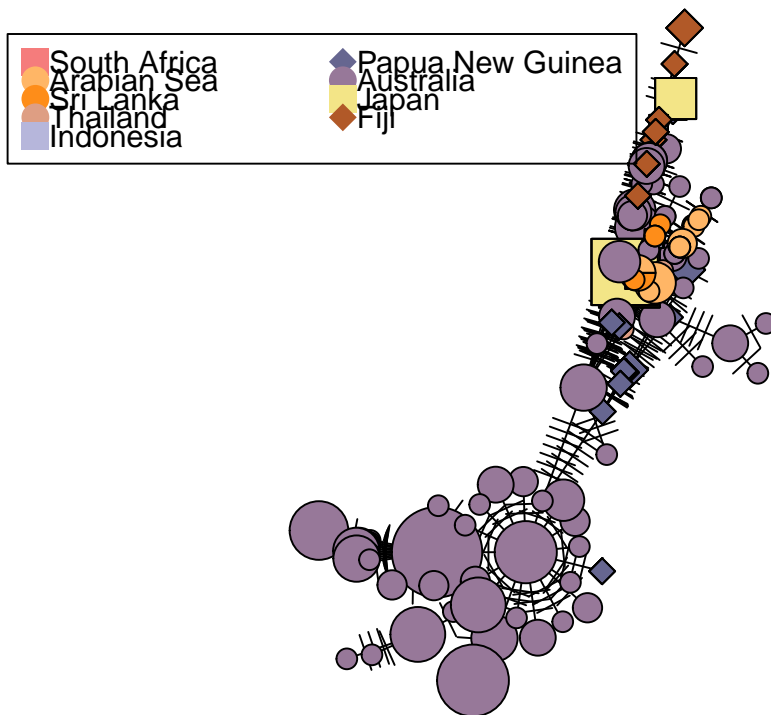

```

dev.print(
  device = png,
  file = "E-IO-W-PAC_cluster_HT_network.png",
  res = 600,
  width = 30,
  height = 30,
  units = "cm")

# xy <- replot()
# save(xy, file = "HT_network_replot_by_E-IO_cluster.Rdata")
load("HT_network_replot_by_E-IO_cluster.Rdata")
par(mar = c(1,1,1,1))
plot(net, xy = xy, size = size.new, scale.ratio = 0.2, pie = ind.hap,
      labels = FALSE, asp = 1, shape = shape,
      show.mutation = 2, threshold = 0, srt = 1, cex = 0.75, bg = colours.new,
      fast = FALSE)
# legend(-40, 70, names(colours), col = colours, pch = 19, ncol = 2,
#        x.intersp = 0.5, y.intersp = 0.5, pt.cex = 2)
# legend(-20, 35, names(colours), col = colours, pch = as.numeric(shape.leg),
#        ncol = 2, x.intersp = 0.5, y.intersp = 0.5, pt.cex = 2)
title(paste0("HT network of all E-IO/W-PAC individuals per Site"))

```

## HT network of all E-IO/W-PAC individuals per Site

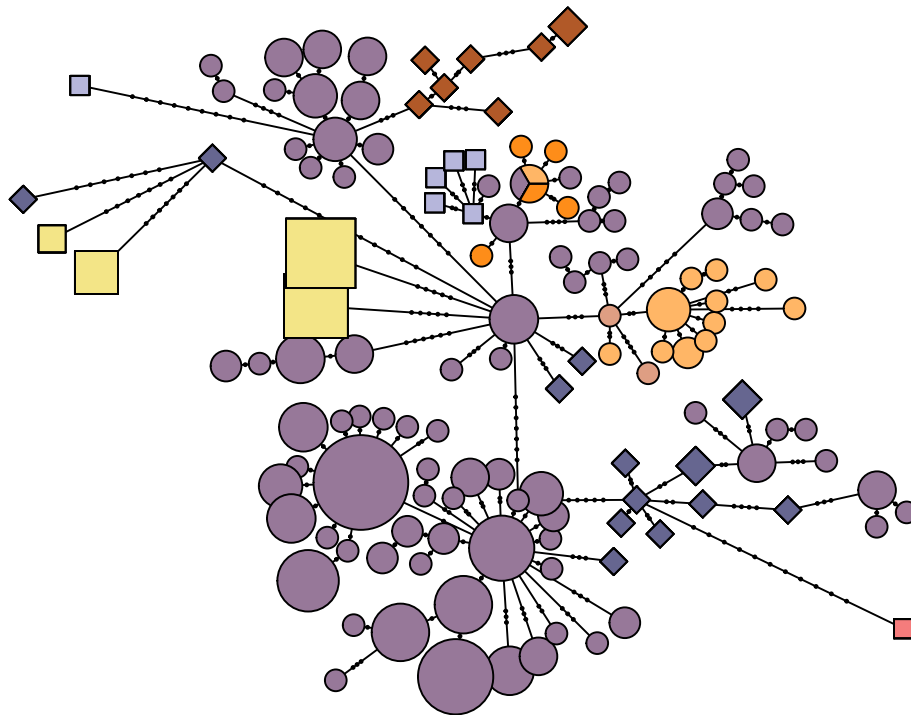

```
dev.print(  
  device = png,  
  file = "E-IO-W-PAC_cluster_HT_network3.png",  
  res = 600,  
  width = 30,  
  height = 30,  
  units = "cm")
```

```
## pdf  
## 2  
## pdf  
## 2  
## pdf  
## 2
```

HT network per Site

```
strata <- as.character(BS.gt@schemes$Site)  
names(strata) <- as.character(BS.gt@schemes$id)  
strataG::setStrata(BS.gt) <- strata
```

```
BS.haps <- strataG::labelHaplotypes(BS.bin, prefix = "HT", use.indels = FALSE)  
haps <- BS.haps$haps
```

```
for (Site in levels(BS.gt@schemes$Site)) {  
  BS.gt.sub <- BS.gt[, , Site, drop = TRUE]  
  if (length(BS.gt.sub@data$id) > 1) {  
    ind.names <- names(BS.dna) %in% BS.gt.sub@data$id  
    BS.dna.sub <- as.dna(BS.dna[ind.names, , drop = TRUE])  
    BS.bin.sub <- subset(BS.bin, names(BS.bin) %in% BS.gt.sub@data$id)  
  
    HTs <- unique(haps[names(haps) %in% names(BS.bin.sub)])  
    BS.h.sub <- pegas::haplotype(BS.bin.sub)
```

```

BS.h.sub <- sort(BS.h.sub, what = "label")
net <- pegas::haploNet(BS.h.sub)
ind.hap <- with(
  stack(setNames(attr(BS.h.sub, "index"), rownames(BS.h.sub))),
  table(hap = ind, pop = BS.gt.sub@data$stratum[values]))

size.new <- attr(net, "freq")
size.new <- sqrt(size.new)

attr(net, "labels") <- paste0(attr(net, "labels"), "\nn=",
  attr(net, "freq"))
plot(net, size = size.new, scale.ratio = 6, pie = NULL,
  show.mutation = 1, threshold = 0, srt = 1, cex = 0.75)
title(paste0(Site))
}
}

```

## Costa Rica

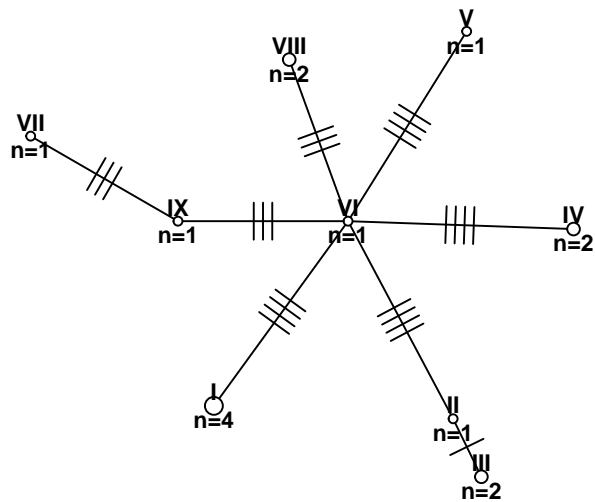

## South Africa

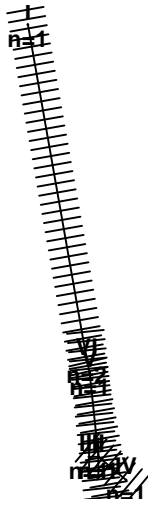

## Reunion

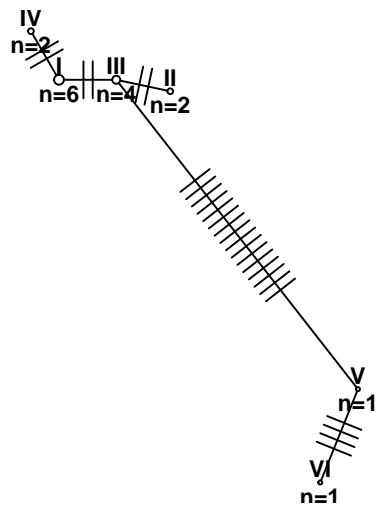

# Seychelles

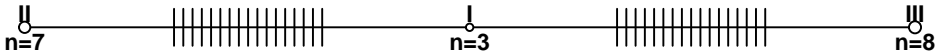

# Arabian Sea

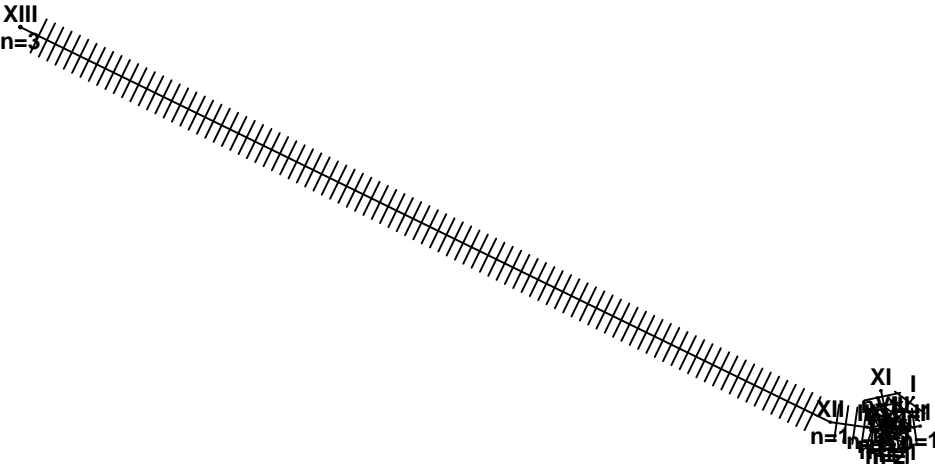

## Sri Lanka

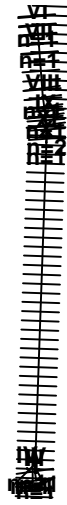

## Thailand

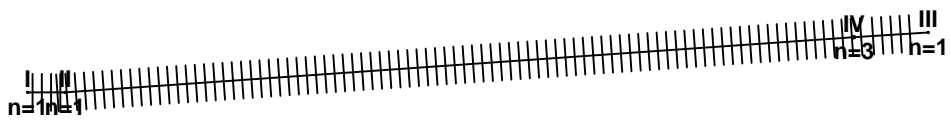

## Indonesia

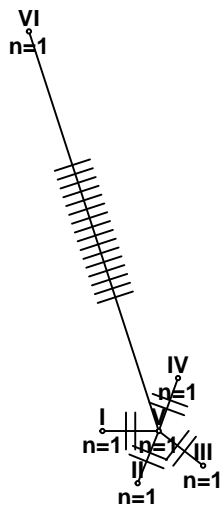

## Papua New Guinea

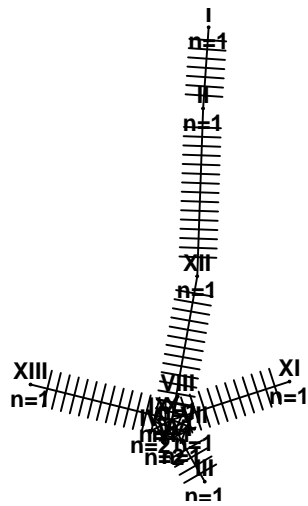



# Australia

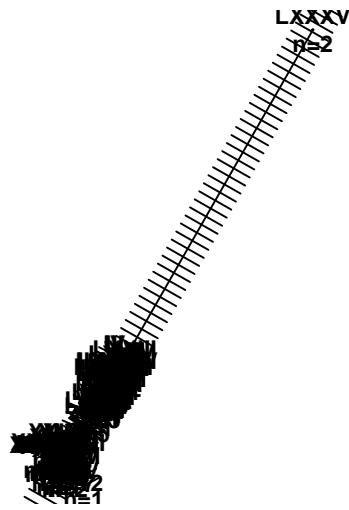

# Japan

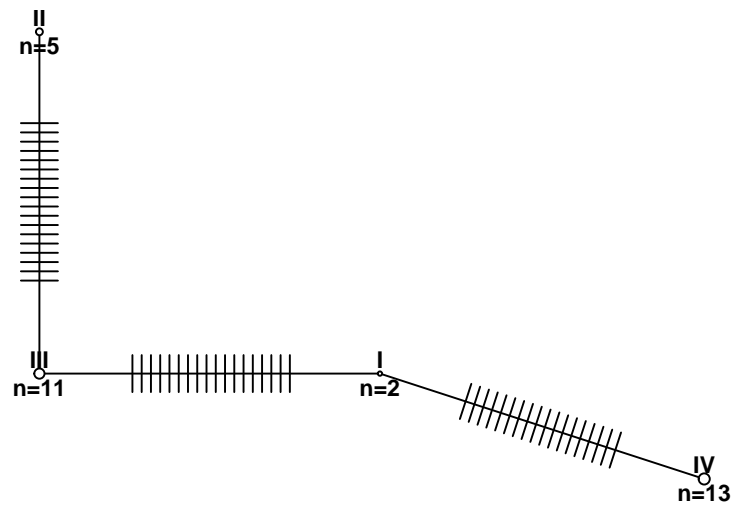

## Fiji

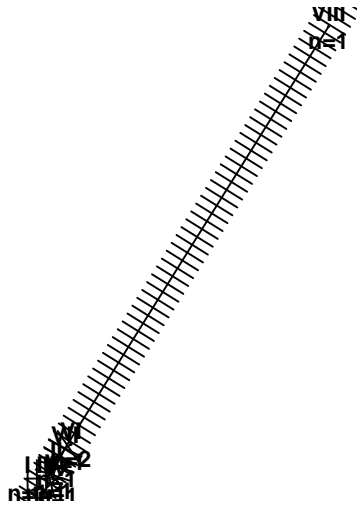

```
strata <- as.character(BS.gt@schemes$Region)
names(strata) <- as.character(BS.gt@schemes$id)
strataG::setStrata(BS.gt) <- strata

net <- pegas::haploNet(BS.h)
ind.hap <- with(
  stack(setNames(attr(BS.h, "index"), rownames(BS.h))),
  table(hap = ind, pop = BS.gt@schemes$Region[values]))

size.new <- attr(net, "freq")
size.new <- sqrt(size.new)
colours.8.new <- colours.8[order(names(colours.8))]
par(mar = c(1,1,1,1))
plot(net, size = size.new, scale.ratio = 0.2, pie = ind.hap, labels = FALSE,
      show.mutation = 0, threshold = 0, srt = 1, cex = 0.75, bg = colours.8)
legend(-30, 50, names(colours.8), col = colours.8, pch = 19, ncol = 2,
       x.intersp = 0.5, y.intersp = 1, pt.cex = 2)
title(paste0("HT network of all individuals per region"))
```

## HT network of all individuals per region

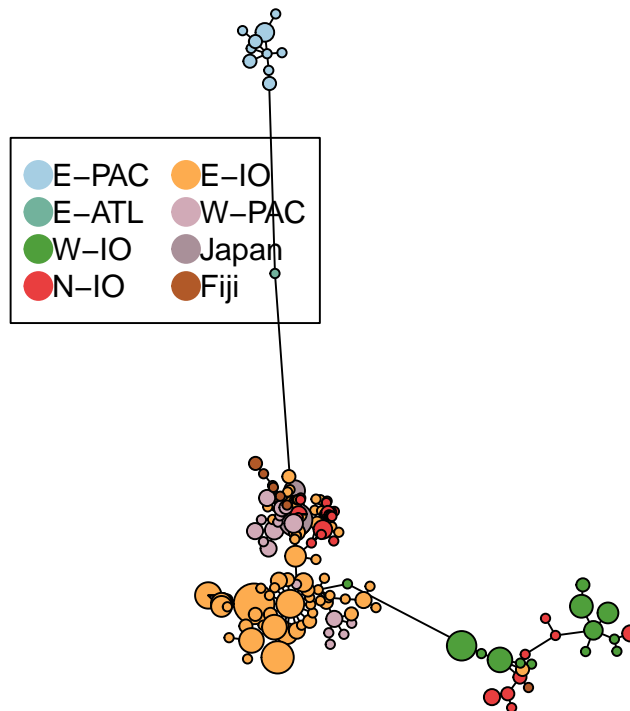

### 13.4.2.1.2 Per region

HT network per region

```
strata <- as.character(BS.gt@schemes$Region)
names(strata) <- as.character(BS.gt@schemes$id)
strataG::setStrata(BS.gt) <- strata

BS.haps <- strataG::labelHaplotypes(BS.bin, prefix = "HT", use.indels = FALSE)
haps <- BS.haps$haps

for (pop in levels(BS.gt@schemes$Region)) {
  BS.gt.sub <- BS.gt[, , pop, drop = TRUE]
  if (length(BS.gt.sub@data$id) > 1) {
    ind.names <- names(BS.dna) %in% BS.gt.sub@data$id
    BS.dna.sub <- as.dna(BS.dna[ind.names, , drop = TRUE])
    BS.bin.sub <- subset(BS.bin, names(BS.bin) %in% BS.gt.sub@data$id)

    HTs <- unique(haps[names(haps) %in% names(BS.bin.sub)])
    # BS.h.sub <- pegas::haplotype(BS.bin.sub, HTs)
    BS.h.sub <- pegas::haplotype(BS.bin.sub)

    BS.h.sub <- sort(BS.h.sub, what = "label")
    net <- pegas::haploNet(BS.h.sub)
    ind.hap <- with(
      stack(setNames(attr(BS.h.sub, "index"), rownames(BS.h.sub))),
      table(hap = ind, pop = BS.gt.sub@data$stratum[values]))

    size.new <- attr(net, "freq")
    size.new <- sqrt(size.new)

    attr(net, "labels") <- paste0(attr(net, "labels"), "\nn=",
      attr(net, "freq"))
  }
}
```

```
plot(net, size = size.new, scale.ratio = 6, pie = NULL,
      show.mutation = 1, threshold = 0, srt = 1, cex = 0.75)
title(paste0(pop))
}
```

### E-PAC

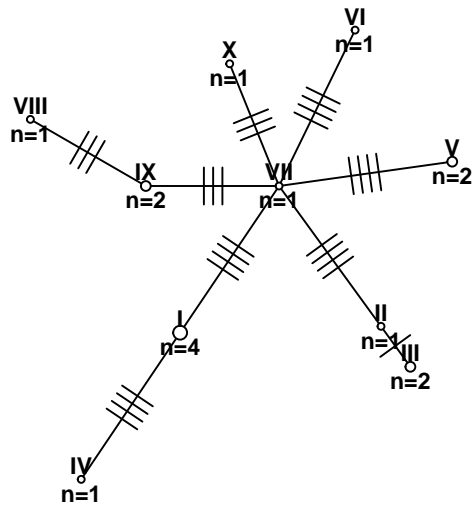

## W-IO

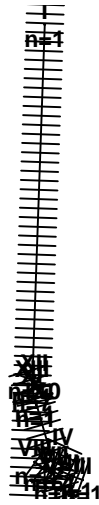

## N-IO

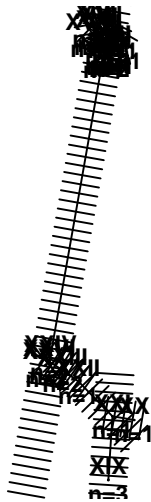

# E-IO

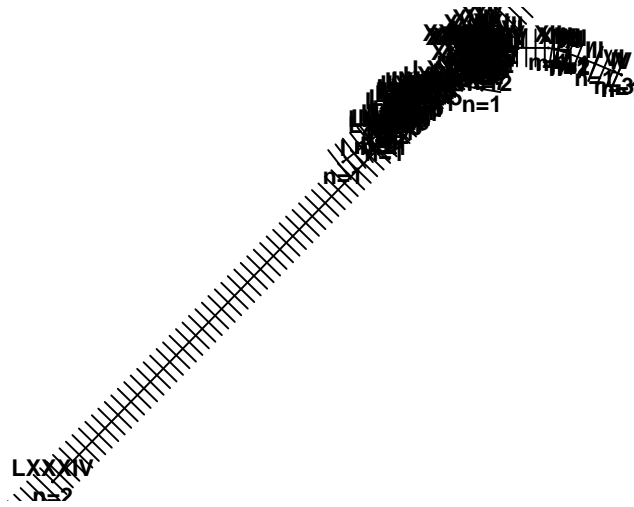

# W-PAC

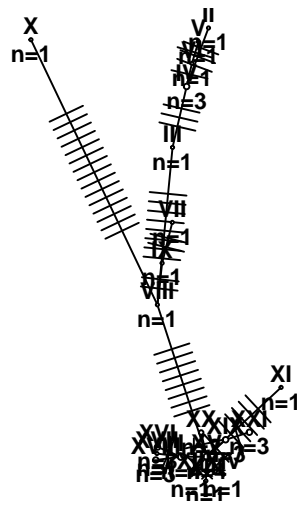

## Japan

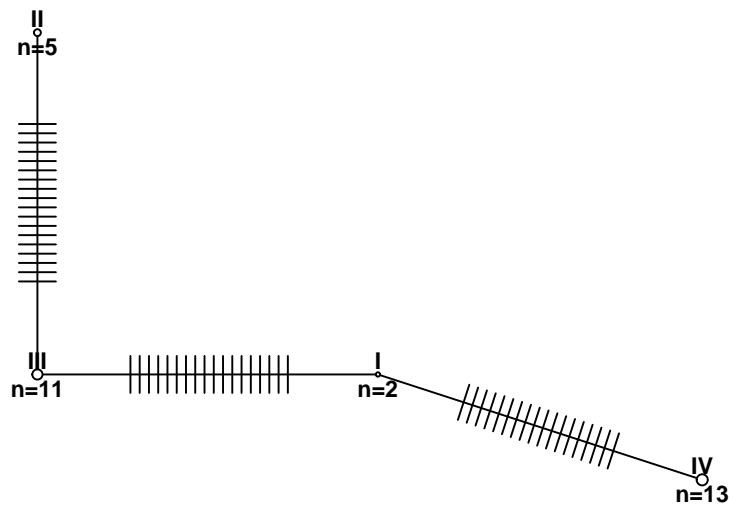

## Fiji

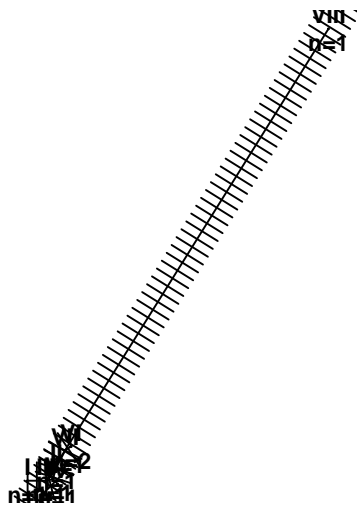

```
strata <- as.character(BS.gt@schemes$Site)
names(strata) <- as.character(BS.gt@schemes$id)
strataG::setStrata(BS.gt) <- strata
```

```

BS.gt.IO <- BS.gt[BS.gt@schemes$id[!BS.gt@schemes$Site %in%
  c("Gulf of California","Costa Rica",
    "Sierra Leone")],,, drop = TRUE]

schemes.IO <- BS.gt.IO@schemes[!BS.gt.IO@schemes$Site %in%
  c("Gulf of California","Costa Rica", "Sierra Leone"),]
strata <- as.character(schemes.IO$Site)
names(strata) <- as.character(schemes.IO$id)
strataG::setStrata(BS.gt.IO) <- strata

ind.names <- names(BS.dna) %in% BS.gt.IO@data$id
BS.dna.IO <- as.dna(BS.dna[ind.names, , drop = TRUE])
BS.bin.IO <- subset(BS.bin, names(BS.bin) %in% BS.gt.IO@data$id)

BS.haps <- strataG::labelHaplotypes(BS.bin.IO, prefix = "HT", use.indels = TRUE)
haps <- BS.haps$haps

HTs <- unique(haps[names(haps) %in% names(BS.bin.IO)])
BS.h.IO <- pegas::haplotype(BS.bin.IO, HTs)

net <- pegas::haploNet(BS.h.IO)
ind.hap <- with(
  stack(setNames(attr(BS.h.IO, "index"), rownames(BS.h.IO))),
  table(hap = ind, pop = strata[values]))

size.new <- attr(net, "freq")
size.new <- sqrt(size.new)

colours <- colours.14[-c(1:3)]
colours.new <- colours[order(names(colours))]

par(mar = c(1,1,1,1))
plot(net, size = size.new, scale.ratio = 0.5, pie = ind.hap, labels = FALSE, asp = 1,
  show.mutation = 0, threshold = 0, srt = 1, cex = 0.75, bg = colours.new)
legend(-40, 70, names(colours), col = colours, pch = 19, ncol = 2,
  x.intersp = 0.5, y.intersp = 0.5, pt.cex = 2)
title(paste0("HT network of all IWP individuals per Site"))

```



## HT network of all IWP individual

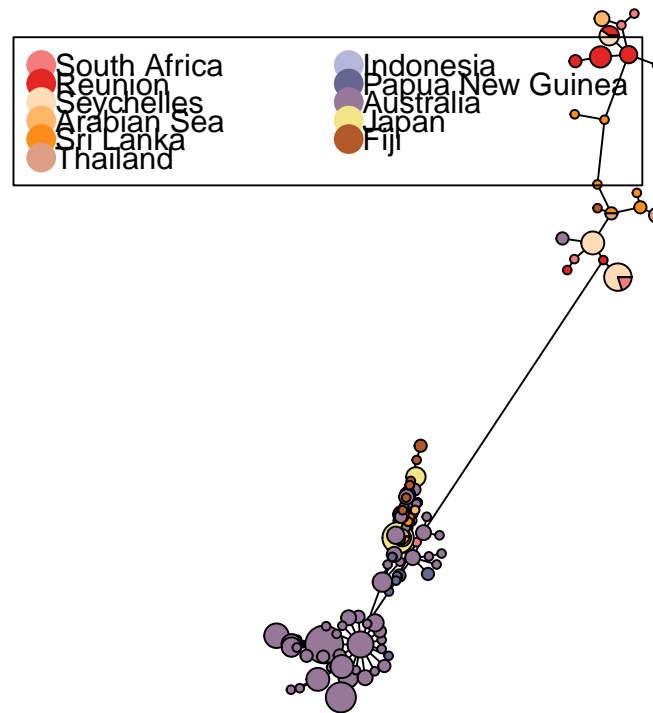

### 13.4.2.2 Within Indo - West Pacific per Site

```
colours <- colours.27[-c(1:3)]
colours.new <- colours[order(names(colours))]
```

```
dev.print(
  device = png,
  file = "Indian_Ocean_HT_network.png",
  res = 600,
  width = 30,
  height = 30,
  units = "cm")
```

```
## pdf
## 2
```

```
strata <- as.character(BS.gt@schemes$Site)
names(strata) <- as.character(BS.gt@schemes$id)
strataG::setStrata(BS.gt) <- strata
AUS.names <- BS.gt@schemes$id[BS.gt@schemes$Site == "Australia" &
  !BS.gt@schemes$id %in% c("CLF012",
    "CLF014")] # 2 samples with high divergence
BS.gt.AUS <- BS.gt[AUS.names,,, drop = TRUE]

schemes.AUS <- BS.gt.AUS@schemes[BS.gt.AUS@schemes$id %in% AUS.names,]
strata <- as.character(schemes.AUS$Location)
names(strata) <- as.character(schemes.AUS$id)
strataG::setStrata(BS.gt.AUS) <- strata
BS.gt.AUS@schemes <- schemes.AUS
```

```

ind.names <- names(BS.dna) %in% AUS.names
BS.dna.AUS <- as.dna(BS.dna[ind.names, , drop = TRUE])
BS.bin.AUS <- subset(BS.bin, names(BS.bin) %in% BS.gt.AUS@data$id)
BS.haps <- strataG::labelHaplotypes(BS.bin.AUS, prefix = "HT", use.indels = TRUE)
haps <- BS.haps$haps
HTs <- unique(haps[names(haps) %in% names(BS.bin.AUS)])
BS.h.AUS <- pegas::haplotype(BS.bin.AUS, HTs)

net <- pegas::haploNet(BS.h.AUS)
ind.hap <- with(
  stack(setNames(attr(BS.h.AUS, "index"), rownames(BS.h.AUS))),
  table(hap = ind, pop = strata[values]))

colours.13.new <- colours.13[order(names(colours.13))]

par(mar = c(1,1,1,1))
plot(net, size = size.new, scale.ratio = 0.5, pie = ind.hap, labels = FALSE, asp = 1,
      show.mutation = 2, threshold = 0, srt = 1, cex = 0.75, bg = colours.13.new)
legend(12, 7, names(colours.13), col = colours.13, pch = 19, ncol = 1,
      x.intersp = 0.2, y.intersp = 0.5, pt.cex = 2)
title(paste0("HT network of all Australian individuals per river"))

```

HT network of all Australian individuals per river

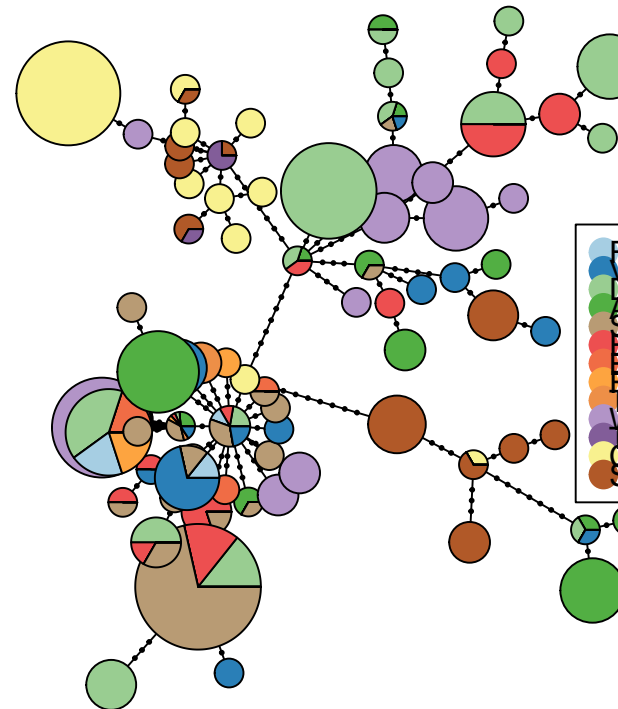

### 13.4.2.3 Within Australia per River

```

dev.print(
  device = png,
  file = "Australia_HT_network4.png",
  res = 600,
  width = 30,
  height = 30,
  units = "cm")

```

```
## pdf
```

```
## 2
```

```
strata <- as.character(BS.gt.AUS@schemes$Location)
names(strata) <- as.character(BS.gt.AUS@schemes$id)
strataG::setStrata(BS.gt.AUS) <- strata

pop.levels <- c("Fitzroy River", "Victoria River", "Daly River",
               "Adelaide River", "South Alligator River", "East Alligator River",
               "Blue mud Bay", "Roper River", "Towns River", "Wenlock River",
               "Trinity inlet", "Clarence River", "Sydney Harbour")
BS.gt.AUS@schemes$Location <- factor(BS.gt.AUS@schemes$Location,
                                     levels = pop.levels)

BS.haps <- strataG::labelHaplotypes(BS.bin.AUS, prefix = "HT",
                                   use.indels = FALSE)

haps <- BS.haps$haps

for (Location in levels(BS.gt.AUS@schemes$Location)) {
  BS.gt.sub <- BS.gt.AUS[, , Location, drop = TRUE]
  if (length(BS.gt.sub@data$id) > 1) {
    ind.names <- names(BS.dna) %in% BS.gt.sub@data$id
    BS.dna.sub <- as.dna(BS.dna[ind.names, , drop = TRUE])
    BS.bin.sub <- subset(BS.bin, names(BS.bin) %in% BS.gt.sub@data$id)

    HTs <- unique(haps[names(haps) %in% names(BS.bin.sub)])
    BS.h.sub <- pegas::haplotype(BS.bin.sub)
    if (length(HTs) > 1) {
      BS.h.sub <- sort(BS.h.sub, what = "label")
      net <- pegas::haploNet(BS.h.sub)
      ind.hap <- with(
        stack(setNames(attr(BS.h.sub, "index"), rownames(BS.h.sub))),
        table(hap = ind, pop = BS.gt.sub@data$stratum[values]))

      size.new <- attr(net, "freq")
      size.new <- sqrt(size.new)

      attr(net, "labels") <- paste0(attr(net, "labels"), "\nn=",
                                   attr(net, "freq"))
      plot(net, size = size.new, scale.ratio = 6, pie = NULL,
           show.mutation = 1, threshold = 0, srt = 1, cex = 0.75)
      title(paste0(Location))
    }
  }
}
```

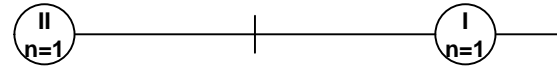

13.4.2.3.1 HT network per Location in Australia

Victoria River

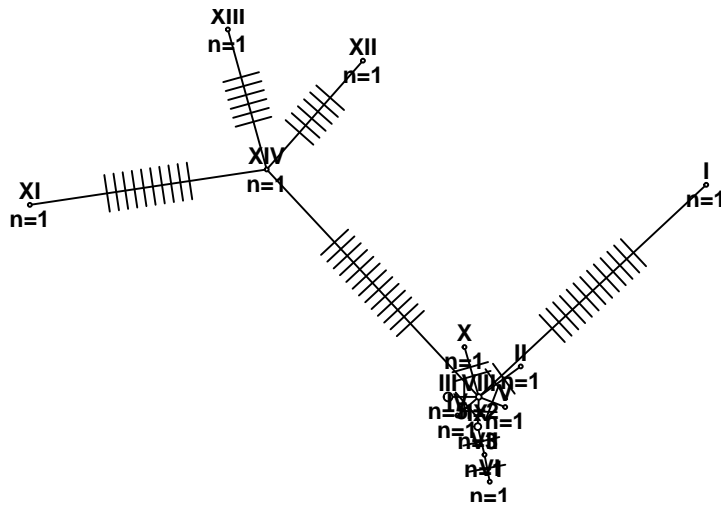

## Daly River

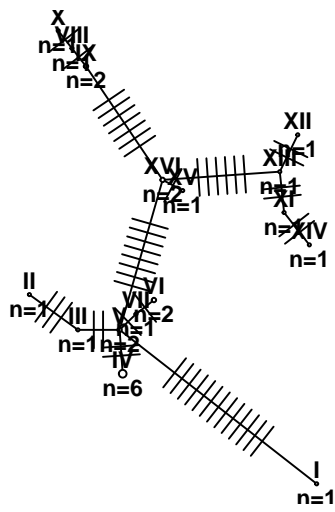

## Adelaide River

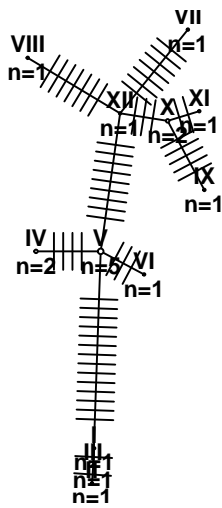

## South Alligator River

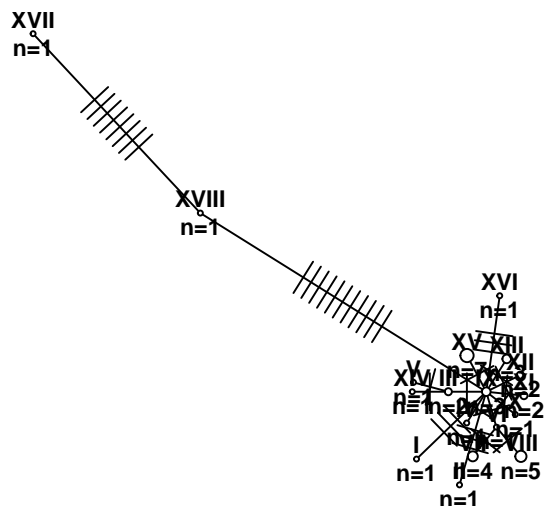

## East Alligator River

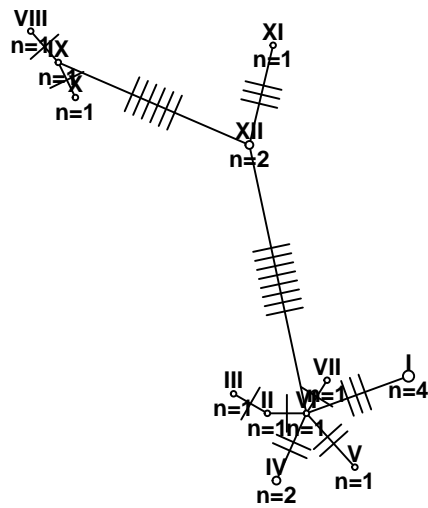

## Blue mud Bay

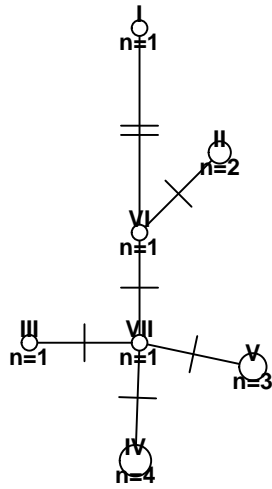

## Roper River

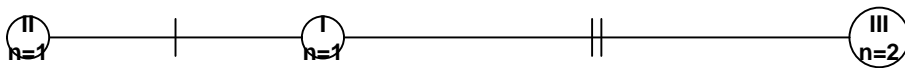

## Towns River

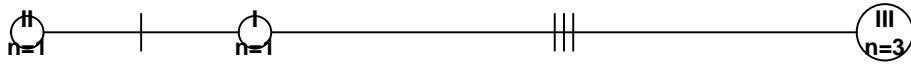

## Wenlock River

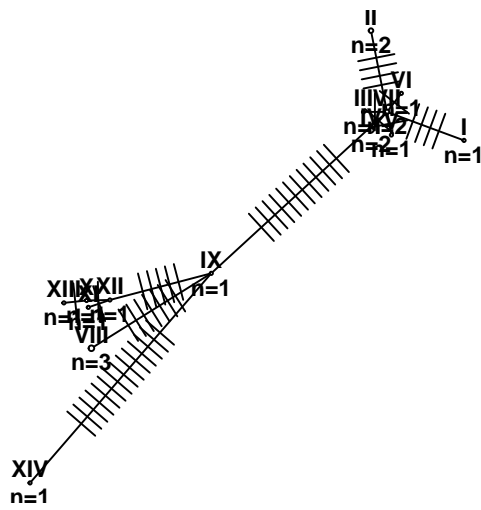



# Clarence River

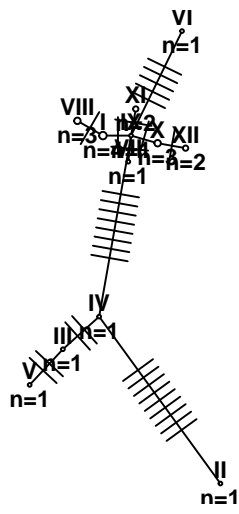

# Sydney Harbour

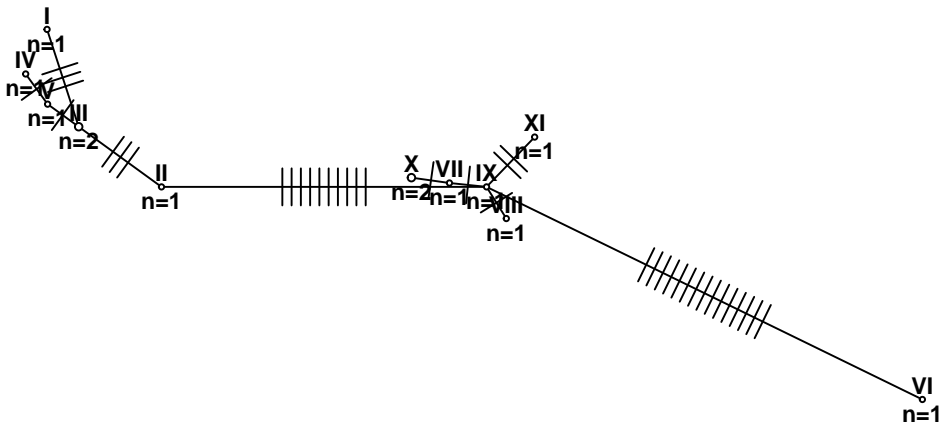

## 13.5 Genetic differentiation

### 13.5.1 PHist per Location

```
strata <- as.character(BS.gt@schemes$Location)
names(strata) <- as.character(BS.gt@schemes$id)
strataG::setStrata(BS.gt) <- strata

popstr.mt.Location <-
  strataG::popStructTest(
    BS.gt,
    nrep = 1000,
    stats = "all",
    type = "both",
    keep.null = FALSE,
    quietly = TRUE,
    max.cores = parallel::detectCores()-1,
    write.output = TRUE
  )
save(popstr.mt.Location, file = "Mitogenome_ALL_Locations_phist.Rdata")
readr::write_tsv(popstr.mt.Location$pairwise$result,
  path = "Mitogenome_ALL_Locations_phist.txt")

load("Mitogenome_ALL_Locations_phist.Rdata")
knitr::kable(
  popstr.mt.Location$overall$result,
  digits = 4,
  # format = "html",
  caption = "Overall mtDNA differentiation between Sites"
) %>%
kableExtra::kable_styling(full_width = FALSE, font_size = 5)

kableExtra::kbl(
  popstr.mt.Location$pairwise$result[order(popstr.mt.Location$pairwise$result$PHist,
    decreasing = TRUE), -c(1:8)],
  caption = "Pairwise mtDNA differentiation between Sites",
  longtable = TRUE, booktabs = TRUE) %>%
kableExtra::kable_styling(full_width = FALSE, font_size = 5,
  latex_options = c("repeat_header", "hold_position"))

pop.levels1 <- c("Gulf of California", "Costa Rica", "Sierra Leone", "South Africa",
  "Reunion", "Seychelles", "Arabian Sea", "Sri Lanka", "Thailand",
  "Indonesia", "Papua New Guinea", "Fitzroy River", "Victoria River",
  "Daly River", "Adelaide River", "South Alligator River",
  "East Alligator River", "Blue mud Bay", "Roper River", "Town's River",
  "Wenlock River", "Trinity inlet", "Clarence River", "Sydney Harbour",
  "Okinawa", "Urauchi River", "Fiji")

m2 <- popstr.mt.Location$pairwise$result[order(match(
  popstr.mt.Location$pairwise$result$strata.1, pop.levels1)), c(1,2,9)]
Gdf <- igraph::graph.data.frame(m2, directed = FALSE)
m2.1 <- igraph::as_adjacency_matrix(Gdf, names = TRUE, sparse = FALSE,
  attr = "PHIst", type = 'upper')

m2 <- popstr.mt.Location$pairwise$result[order(match(
  popstr.mt.Location$pairwise$result$strata.1, pop.levels1)), c(1,2,10)]
Gdf <- igraph::graph.data.frame(m2, directed = FALSE)
m2.2 <- igraph::as_adjacency_matrix(Gdf, names = TRUE, sparse = FALSE,
```

Table 67: Overall mtDNA differentiation between Sites

|       | estimate  | p.val |
|-------|-----------|-------|
| Chi2  | 9334.0000 | 0.001 |
| Fst   | 0.0000    | 1.000 |
| PHist | 0.7537    | 0.001 |

```

attr = "PHist.p.val", type = 'upper')
m2$PHist.p.adj <- p.adjust(m2$PHist.p.val, "bonferroni")
Gdf <- igraph::graph.data.frame(m2, directed = FALSE)
m2.3 <- igraph::as_adjacency_matrix(Gdf, names = TRUE, sparse = FALSE,
attr = "PHist.p.adj", type = 'upper')
write.csv(m2.1, file = "Mitogenome_ALL_phist_Locations.csv")
write.csv(m2.2, file = "Mitogenome_ALL_phist_Pval_Locations.csv")
write.csv(m2.3, file = "Mitogenome_ALL_phist_Pval_Bonferroni_Locations.csv")

```

Table 68: Pairwise mtDNA differentiation between Sites

|                                                      | PHist     | PHist.p.val |
|------------------------------------------------------|-----------|-------------|
| Gulf of California (1) v. Trinity inlet (4)          | 1.0000000 | 0.2047952   |
| Sierra Leone (1) v. Trinity inlet (4)                | 1.0000000 | 0.2147852   |
| Gulf of California (1) v. Urauchi River (21)         | 0.9887413 | 0.0519481   |
| Sierra Leone (1) v. Urauchi River (21)               | 0.9885876 | 0.0439560   |
| Blue mud Bay (13) v. Gulf of California (1)          | 0.9884460 | 0.0709291   |
| Blue mud Bay (13) v. Sierra Leone (1)                | 0.9882860 | 0.0969031   |
| Gulf of California (1) v. Roper River (4)            | 0.9878215 | 0.2077922   |
| Roper River (4) v. Sierra Leone (1)                  | 0.9876525 | 0.2037962   |
| Gulf of California (1) v. Towns River (5)            | 0.9854394 | 0.1518482   |
| Sierra Leone (1) v. Towns River (5)                  | 0.9852380 | 0.1718282   |
| Costa Rica (15) v. Urauchi River (21)                | 0.9811117 | 0.0009990   |
| Blue mud Bay (13) v. Costa Rica (15)                 | 0.9785333 | 0.0009990   |
| Gulf of California (1) v. South Alligator River (38) | 0.9769065 | 0.0269730   |
| Sierra Leone (1) v. South Alligator River (38)       | 0.9765779 | 0.0219780   |
| Costa Rica (15) v. Trinity inlet (4)                 | 0.9750733 | 0.0009990   |
| Costa Rica (15) v. South Alligator River (38)        | 0.9748986 | 0.0009990   |
| Costa Rica (15) v. Towns River (5)                   | 0.9735751 | 0.0009990   |
| Costa Rica (15) v. Roper River (4)                   | 0.9732309 | 0.0019980   |
| Costa Rica (15) v. Reunion (16)                      | 0.9694116 | 0.0009990   |
| Gulf of California (1) v. Reunion (16)               | 0.9684873 | 0.0679321   |
| Reunion (16) v. Sierra Leone (1)                     | 0.9684819 | 0.0529471   |
| Costa Rica (15) v. Seychelles (18)                   | 0.9684040 | 0.0009990   |
| Clarence River (21) v. Costa Rica (15)               | 0.9676359 | 0.0009990   |
| Reunion (16) v. Urauchi River (21)                   | 0.9672442 | 0.0009990   |
| Gulf of California (1) v. Seychelles (18)            | 0.9670436 | 0.0499500   |
| Seychelles (18) v. Sierra Leone (1)                  | 0.9670379 | 0.0569431   |
| Clarence River (21) v. Gulf of California (1)        | 0.9662884 | 0.0499500   |
| Clarence River (21) v. Sierra Leone (1)              | 0.9658398 | 0.0399600   |
| Costa Rica (15) v. Indonesia (6)                     | 0.9652015 | 0.0009990   |
| Seychelles (18) v. Urauchi River (21)                | 0.9636613 | 0.0009990   |
| Blue mud Bay (13) v. Reunion (16)                    | 0.9631304 | 0.0009990   |
| Blue mud Bay (13) v. Seychelles (18)                 | 0.9591600 | 0.0009990   |
| Costa Rica (15) v. Victoria River (21)               | 0.9587297 | 0.0009990   |
| Reunion (16) v. South Alligator River (38)           | 0.9584980 | 0.0009990   |
| Costa Rica (15) v. Sierra Leone (1)                  | 0.9575420 | 0.0629371   |
| Costa Rica (15) v. Okinawa (10)                      | 0.9573514 | 0.0009990   |
| Reunion (16) v. Trinity inlet (4)                    | 0.9563031 | 0.0009990   |
| Costa Rica (15) v. East Alligator River (17)         | 0.9559540 | 0.0009990   |
| Seychelles (18) v. South Alligator River (38)        | 0.9553989 | 0.0009990   |
| Reunion (16) v. Towns River (5)                      | 0.9541431 | 0.0009990   |
| Costa Rica (15) v. Sydney Harbour (13)               | 0.9541290 | 0.0009990   |
| Reunion (16) v. Roper River (4)                      | 0.9534421 | 0.0009990   |
| Seychelles (18) v. Trinity inlet (4)                 | 0.9515810 | 0.0009990   |
| Gulf of California (1) v. Indonesia (6)              | 0.9511629 | 0.1458541   |
| Gulf of California (1) v. Victoria River (21)        | 0.9509015 | 0.0439560   |
| Costa Rica (15) v. Papua New Guinea (15)             | 0.9505300 | 0.0009990   |
| Indonesia (6) v. Sierra Leone (1)                    | 0.9504958 | 0.1268731   |
| Seychelles (18) v. Towns River (5)                   | 0.9502713 | 0.0009990   |
| Sierra Leone (1) v. Victoria River (21)              | 0.9501907 | 0.0499500   |
| Roper River (4) v. Seychelles (18)                   | 0.9494001 | 0.0009990   |
| Costa Rica (15) v. Wenlock River (19)                | 0.9489106 | 0.0009990   |
| Costa Rica (15) v. Daly River (25)                   | 0.9472102 | 0.0009990   |
| Clarence River (21) v. Reunion (16)                  | 0.9463779 | 0.0009990   |
| Adelaide River (18) v. Costa Rica (15)               | 0.9443990 | 0.0009990   |
| East Alligator River (17) v. Gulf of California (1)  | 0.9437660 | 0.0589411   |
| East Alligator River (17) v. Sierra Leone (1)        | 0.9429891 | 0.0619381   |
| Clarence River (21) v. Seychelles (18)               | 0.9428199 | 0.0009990   |
| Indonesia (6) v. Reunion (16)                        | 0.9408742 | 0.0009990   |
| Gulf of California (1) v. Okinawa (10)               | 0.9374170 | 0.0909091   |
| Indonesia (6) v. Seychelles (18)                     | 0.9370692 | 0.0009990   |

Table 68: Pairwise mtDNA differentiation between Sites (continued)

|                                                  | PHist     | PHist.p.val |
|--------------------------------------------------|-----------|-------------|
| Okinawa (10) v. Sierra Leone (1)                 | 0.9365667 | 0.0829171   |
| Gulf of California (1) v. Sydney Harbour (13)    | 0.9358266 | 0.0799201   |
| Sierra Leone (1) v. Sydney Harbour (13)          | 0.9349417 | 0.0589411   |
| Daly River (25) v. Gulf of California (1)        | 0.9337473 | 0.0419580   |
| Reunion (16) v. Victoria River (21)              | 0.9327623 | 0.0009990   |
| Daly River (25) v. Sierra Leone (1)              | 0.9326885 | 0.0319680   |
| Gulf of California (1) v. Wenlock River (19)     | 0.9324838 | 0.0469530   |
| Sierra Leone (1) v. Wenlock River (19)           | 0.9314555 | 0.0559441   |
| Okinawa (10) v. Reunion (16)                     | 0.9311654 | 0.0009990   |
| Gulf of California (1) v. Papua New Guinea (15)  | 0.9309788 | 0.0739261   |
| Papua New Guinea (15) v. Sierra Leone (1)        | 0.9300344 | 0.0529471   |
| Seychelles (18) v. Victoria River (21)           | 0.9294086 | 0.0009990   |
| East Alligator River (17) v. Reunion (16)        | 0.9285024 | 0.0009990   |
| Okinawa (10) v. Seychelles (18)                  | 0.9280175 | 0.0009990   |
| East Alligator River (17) v. Seychelles (18)     | 0.9251465 | 0.0009990   |
| Reunion (16) v. Sydney Harbour (13)              | 0.9249207 | 0.0009990   |
| Costa Rica (15) v. Fiji (9)                      | 0.9246048 | 0.0009990   |
| Adelaide River (18) v. Gulf of California (1)    | 0.9232640 | 0.0589411   |
| Adelaide River (18) v. Sierra Leone (1)          | 0.9220914 | 0.0579421   |
| Seychelles (18) v. Sydney Harbour (13)           | 0.9215933 | 0.0009990   |
| Papua New Guinea (15) v. Reunion (16)            | 0.9190447 | 0.0009990   |
| Reunion (16) v. Wenlock River (19)               | 0.9179158 | 0.0009990   |
| Papua New Guinea (15) v. Seychelles (18)         | 0.9160519 | 0.0009990   |
| Daly River (25) v. Reunion (16)                  | 0.9152573 | 0.0009990   |
| Seychelles (18) v. Wenlock River (19)            | 0.9146460 | 0.0009990   |
| Costa Rica (15) v. South Africa (7)              | 0.9130404 | 0.0019980   |
| Daly River (25) v. Seychelles (18)               | 0.9118562 | 0.0009990   |
| Roper River (4) v. Trinity inlet (4)             | 0.9106151 | 0.0339660   |
| Adelaide River (18) v. Reunion (16)              | 0.9105991 | 0.0009990   |
| Adelaide River (18) v. Seychelles (18)           | 0.9073780 | 0.0009990   |
| South Africa (7) v. South Alligator River (38)   | 0.8974237 | 0.0009990   |
| Costa Rica (15) v. Fitzroy River (5)             | 0.8910443 | 0.0009990   |
| Costa Rica (15) v. Thailand (6)                  | 0.8866068 | 0.0009990   |
| Towns River (5) v. Trinity inlet (4)             | 0.8846628 | 0.0039960   |
| South Africa (7) v. Urauchi River (21)           | 0.8838649 | 0.0009990   |
| Blue mud Bay (13) v. Urauchi River (21)          | 0.8834663 | 0.0009990   |
| Trinity inlet (4) v. Urauchi River (21)          | 0.8820587 | 0.0009990   |
| Roper River (4) v. Urauchi River (21)            | 0.8799386 | 0.0009990   |
| Towns River (5) v. Urauchi River (21)            | 0.8792479 | 0.0009990   |
| Arabian Sea (19) v. Costa Rica (15)              | 0.8773310 | 0.0009990   |
| Blue mud Bay (13) v. Trinity inlet (4)           | 0.8729977 | 0.0019980   |
| Fiji (9) v. Reunion (16)                         | 0.8639407 | 0.0009990   |
| Fiji (9) v. Seychelles (18)                      | 0.8618021 | 0.0009990   |
| Clarence River (21) v. South Africa (7)          | 0.8488479 | 0.0009990   |
| Fiji (9) v. Gulf of California (1)               | 0.8483095 | 0.0889111   |
| Blue mud Bay (13) v. South Africa (7)            | 0.8464529 | 0.0009990   |
| Fiji (9) v. Sierra Leone (1)                     | 0.8462238 | 0.0929071   |
| Costa Rica (15) v. Sri Lanka (12)                | 0.8322144 | 0.0009990   |
| South Africa (7) v. Victoria River (21)          | 0.8282895 | 0.0009990   |
| South Alligator River (38) v. Thailand (6)       | 0.8250337 | 0.0009990   |
| Daly River (25) v. South Africa (7)              | 0.8128966 | 0.0009990   |
| East Alligator River (17) v. South Africa (7)    | 0.8081566 | 0.0009990   |
| Arabian Sea (19) v. Gulf of California (1)       | 0.8037655 | 0.0559441   |
| South Alligator River (38) v. Urauchi River (21) | 0.8021153 | 0.0009990   |
| Arabian Sea (19) v. Sierra Leone (1)             | 0.8019334 | 0.0469530   |
| South Africa (7) v. Wenlock River (19)           | 0.7998318 | 0.0009990   |
| Sierra Leone (1) v. South Africa (7)             | 0.7883953 | 0.1148851   |
| Gulf of California (1) v. South Africa (7)       | 0.7880327 | 0.1358641   |
| Adelaide River (18) v. South Africa (7)          | 0.7839000 | 0.0009990   |
| Papua New Guinea (15) v. South Africa (7)        | 0.7819128 | 0.0009990   |
| South Africa (7) v. Sydney Harbour (13)          | 0.7806569 | 0.0009990   |
| Thailand (6) v. Urauchi River (21)               | 0.7801245 | 0.0009990   |
| Okinawa (10) v. South Africa (7)                 | 0.7771304 | 0.0009990   |
| Arabian Sea (19) v. Seychelles (18)              | 0.7762695 | 0.0009990   |
| Arabian Sea (19) v. Reunion (16)                 | 0.7756795 | 0.0009990   |
| Blue mud Bay (13) v. Indonesia (6)               | 0.7616878 | 0.0009990   |
| South Africa (7) v. Towns River (5)              | 0.7565992 | 0.0009990   |
| Clarence River (21) v. Urauchi River (21)        | 0.7503802 | 0.0009990   |
| Indonesia (6) v. South Africa (7)                | 0.7474610 | 0.0019980   |
| Clarence River (21) v. Thailand (6)              | 0.7412919 | 0.0009990   |
| South Africa (7) v. Trinity inlet (4)            | 0.7407161 | 0.0049950   |
| Roper River (4) v. South Africa (7)              | 0.7363390 | 0.0039960   |
| Blue mud Bay (13) v. Thailand (6)                | 0.7294146 | 0.0009990   |
| South Alligator River (38) v. Trinity inlet (4)  | 0.7202121 | 0.0009990   |
| Thailand (6) v. Victoria River (21)              | 0.7132750 | 0.0009990   |
| Fitzroy River (5) v. Reunion (16)                | 0.7125173 | 0.0009990   |
| Indonesia (6) v. South Alligator River (38)      | 0.7053679 | 0.0009990   |
| South Alligator River (38) v. Sri Lanka (12)     | 0.6920817 | 0.0009990   |
| Daly River (25) v. Thailand (6)                  | 0.6913071 | 0.0009990   |
| Blue mud Bay (13) v. Okinawa (10)                | 0.6912234 | 0.0009990   |
| Okinawa (10) v. South Alligator River (38)       | 0.6873925 | 0.0009990   |
| Fitzroy River (5) v. Seychelles (18)             | 0.6784070 | 0.0049950   |
| Gulf of California (1) v. Thailand (6)           | 0.6772203 | 0.1418581   |
| East Alligator River (17) v. Thailand (6)        | 0.6765307 | 0.0009990   |

Table 68: Pairwise mtDNA differentiation between Sites (continued)

|                                                     | PHist     | PHist.p.val |
|-----------------------------------------------------|-----------|-------------|
| Sierra Leone (1) v. Thailand (6)                    | 0.6757185 | 0.1658342   |
| Indonesia (6) v. Towns River (5)                    | 0.6727657 | 0.0059940   |
| Urauchi River (21) v. Victoria River (21)           | 0.6671736 | 0.0009990   |
| Thailand (6) v. Wenlock River (19)                  | 0.6658557 | 0.0009990   |
| Sydney Harbour (13) v. Urauchi River (21)           | 0.6656183 | 0.0009990   |
| Fitzroy River (5) v. Urauchi River (21)             | 0.6655974 | 0.0019980   |
| Gulf of California (1) v. Sri Lanka (12)            | 0.6642238 | 0.0689311   |
| Sierra Leone (1) v. Sri Lanka (12)                  | 0.6622797 | 0.0749251   |
| Indonesia (6) v. Urauchi River (21)                 | 0.6598200 | 0.0009990   |
| Indonesia (6) v. Roper River (4)                    | 0.6513836 | 0.0079920   |
| Fitzroy River (5) v. Gulf of California (1)         | 0.6491786 | 0.1648352   |
| Papua New Guinea (15) v. Thailand (6)               | 0.6477381 | 0.0009990   |
| Blue mud Bay (13) v. Clarence River (21)            | 0.6463417 | 0.0009990   |
| Fitzroy River (5) v. Sierra Leone (1)               | 0.6462521 | 0.1728272   |
| Adelaide River (18) v. Thailand (6)                 | 0.6456381 | 0.0009990   |
| Fiji (9) v. South Africa (7)                        | 0.6425882 | 0.0029970   |
| Papua New Guinea (15) v. Urauchi River (21)         | 0.6385181 | 0.0009990   |
| Sydney Harbour (13) v. Thailand (6)                 | 0.6381324 | 0.0009990   |
| Indonesia (6) v. Trinity inlet (4)                  | 0.6291095 | 0.0049950   |
| Okinawa (10) v. Thailand (6)                        | 0.6211585 | 0.0009990   |
| East Alligator River (17) v. Urauchi River (21)     | 0.6152912 | 0.0009990   |
| Fitzroy River (5) v. South Alligator River (38)     | 0.6109927 | 0.0069930   |
| Fiji (9) v. Urauchi River (21)                      | 0.6107598 | 0.0009990   |
| Sri Lanka (12) v. Urauchi River (21)                | 0.6102716 | 0.0009990   |
| Reunion (16) v. Seychelles (18)                     | 0.6057351 | 0.0009990   |
| Clarence River (21) v. South Alligator River (38)   | 0.6028123 | 0.0009990   |
| Okinawa (10) v. Towns River (5)                     | 0.5981897 | 0.0009990   |
| Clarence River (21) v. Towns River (5)              | 0.5971462 | 0.0009990   |
| Fiji (9) v. South Alligator River (38)              | 0.5935288 | 0.0009990   |
| Arabian Sea (19) v. South Africa (7)                | 0.5897958 | 0.0019980   |
| Clarence River (21) v. Sri Lanka (12)               | 0.5847829 | 0.0009990   |
| Thailand (6) v. Towns River (5)                     | 0.5803960 | 0.0249750   |
| Clarence River (21) v. Roper River (4)              | 0.5782384 | 0.0009990   |
| Okinawa (10) v. Roper River (4)                     | 0.5735961 | 0.0049950   |
| Clarence River (21) v. Indonesia (6)                | 0.5712502 | 0.0009990   |
| Clarence River (21) v. Okinawa (10)                 | 0.5695569 | 0.0009990   |
| Sri Lanka (12) v. Victoria River (21)               | 0.5633338 | 0.0009990   |
| Blue mud Bay (13) v. Sri Lanka (12)                 | 0.5611878 | 0.0009990   |
| Okinawa (10) v. Urauchi River (21)                  | 0.5547461 | 0.0029970   |
| Daly River (25) v. Sri Lanka (12)                   | 0.5521694 | 0.0009990   |
| Okinawa (10) v. Trinity inlet (4)                   | 0.5505012 | 0.0029970   |
| Indonesia (6) v. Thailand (6)                       | 0.5499141 | 0.0139860   |
| Roper River (4) v. Thailand (6)                     | 0.5435733 | 0.0069930   |
| Clarence River (21) v. Fitzroy River (5)            | 0.5430071 | 0.0009990   |
| Thailand (6) v. Trinity inlet (4)                   | 0.5393582 | 0.0069930   |
| Urauchi River (21) v. Wenlock River (19)            | 0.5292057 | 0.0009990   |
| Blue mud Bay (13) v. Sydney Harbour (13)            | 0.5284805 | 0.0009990   |
| South Alligator River (38) v. Sydney Harbour (13)   | 0.5270156 | 0.0009990   |
| East Alligator River (17) v. Sri Lanka (12)         | 0.5241172 | 0.0009990   |
| Sri Lanka (12) v. Wenlock River (19)                | 0.5204537 | 0.0009990   |
| Reunion (16) v. Thailand (6)                        | 0.5202350 | 0.0009990   |
| Daly River (25) v. Urauchi River (21)               | 0.5144132 | 0.0009990   |
| Adelaide River (18) v. Urauchi River (21)           | 0.5143602 | 0.0009990   |
| Blue mud Bay (13) v. Fiji (9)                       | 0.5119905 | 0.0009990   |
| Papua New Guinea (15) v. Sri Lanka (12)             | 0.5035981 | 0.0009990   |
| Trinity inlet (4) v. Victoria River (21)            | 0.5021163 | 0.0009990   |
| Okinawa (10) v. Victoria River (21)                 | 0.5005285 | 0.0009990   |
| Adelaide River (18) v. Sri Lanka (12)               | 0.5004452 | 0.0009990   |
| Sri Lanka (12) v. Sydney Harbour (13)               | 0.4898373 | 0.0009990   |
| Papua New Guinea (15) v. South Alligator River (38) | 0.4858569 | 0.0009990   |
| Arabian Sea (19) v. South Alligator River (38)      | 0.4830534 | 0.0009990   |
| Okinawa (10) v. Sri Lanka (12)                      | 0.4758559 | 0.0009990   |
| Blue mud Bay (13) v. Papua New Guinea (15)          | 0.4748028 | 0.0009990   |
| Blue mud Bay (13) v. Fitzroy River (5)              | 0.4691471 | 0.0049950   |
| Indonesia (6) v. Victoria River (21)                | 0.4628799 | 0.0019980   |
| Reunion (16) v. Sri Lanka (12)                      | 0.4561799 | 0.0009990   |
| Fiji (9) v. Thailand (6)                            | 0.4506479 | 0.0019980   |
| East Alligator River (17) v. Trinity inlet (4)      | 0.4491245 | 0.0009990   |
| Okinawa (10) v. Sydney Harbour (13)                 | 0.4461679 | 0.0009990   |
| Clarence River (21) v. Victoria River (21)          | 0.4404689 | 0.0009990   |
| Fitzroy River (5) v. Victoria River (21)            | 0.4389129 | 0.0269730   |
| East Alligator River (17) v. Okinawa (10)           | 0.4353099 | 0.0009990   |
| Sri Lanka (12) v. Towns River (5)                   | 0.4340831 | 0.0059940   |
| Daly River (25) v. Fitzroy River (5)                | 0.4331509 | 0.0079920   |
| Fitzroy River (5) v. Okinawa (10)                   | 0.4312088 | 0.0009990   |
| Papua New Guinea (15) v. Trinity inlet (4)          | 0.4287198 | 0.0009990   |
| Sydney Harbour (13) v. Towns River (5)              | 0.4276393 | 0.0019980   |
| Clarence River (21) v. Papua New Guinea (15)        | 0.4271172 | 0.0009990   |
| Indonesia (6) v. Okinawa (10)                       | 0.4246671 | 0.0129870   |
| Indonesia (6) v. Papua New Guinea (15)              | 0.4237095 | 0.0009990   |
| Okinawa (10) v. Papua New Guinea (15)               | 0.4109033 | 0.0009990   |
| Clarence River (21) v. East Alligator River (17)    | 0.4107713 | 0.0009990   |
| Fiji (9) v. Victoria River (21)                     | 0.4101916 | 0.0009990   |
| Indonesia (6) v. Sydney Harbour (13)                | 0.4093502 | 0.0009990   |

Table 68: Pairwise mtDNA differentiation between Sites (continued)

|                                                    | PHist     | PHist.p.val |
|----------------------------------------------------|-----------|-------------|
| Fitzroy River (5) v. Papua New Guinea (15)         | 0.4048663 | 0.0039960   |
| Fitzroy River (5) v. Wenlock River (19)            | 0.4047859 | 0.0089910   |
| East Alligator River (17) v. Fitzroy River (5)     | 0.4039457 | 0.0289710   |
| Roper River (4) v. Sri Lanka (12)                  | 0.4038690 | 0.0229770   |
| Seychelles (18) v. Thailand (6)                    | 0.3993580 | 0.0009990   |
| Fitzroy River (5) v. Sydney Harbour (13)           | 0.3990371 | 0.0009990   |
| Seychelles (18) v. Sri Lanka (12)                  | 0.3954333 | 0.0009990   |
| Roper River (4) v. Sydney Harbour (13)             | 0.3935885 | 0.0009990   |
| Sri Lanka (12) v. Trinity inlet (4)                | 0.3926234 | 0.0169830   |
| Arabian Sea (19) v. Blue mud Bay (13)              | 0.3921366 | 0.0009990   |
| Indonesia (6) v. Sri Lanka (12)                    | 0.3909716 | 0.0339660   |
| East Alligator River (17) v. Indonesia (6)         | 0.3893668 | 0.0009990   |
| Fiji (9) v. Okinawa (10)                           | 0.3891665 | 0.0009990   |
| Arabian Sea (19) v. Thailand (6)                   | 0.3865570 | 0.0059940   |
| Daly River (25) v. Okinawa (10)                    | 0.3861823 | 0.0009990   |
| Papua New Guinea (15) v. Towns River (5)           | 0.3796237 | 0.0019980   |
| Okinawa (10) v. Wenlock River (19)                 | 0.3779682 | 0.0009990   |
| Daly River (25) v. Trinity inlet (4)               | 0.3768918 | 0.0009990   |
| Adelaide River (18) v. Fitzroy River (5)           | 0.3750436 | 0.0219780   |
| Fiji (9) v. Towns River (5)                        | 0.3671478 | 0.0009990   |
| Clarence River (21) v. Daly River (25)             | 0.3659189 | 0.0009990   |
| East Alligator River (17) v. Fiji (9)              | 0.3631261 | 0.0009990   |
| Arabian Sea (19) v. Clarence River (21)            | 0.3615792 | 0.0009990   |
| Daly River (25) v. Fiji (9)                        | 0.3583998 | 0.0009990   |
| Trinity inlet (4) v. Wenlock River (19)            | 0.3573103 | 0.0009990   |
| Adelaide River (18) v. Okinawa (10)                | 0.3564518 | 0.0009990   |
| Clarence River (21) v. Wenlock River (19)          | 0.3479436 | 0.0009990   |
| Fitzroy River (5) v. Indonesia (6)                 | 0.3454361 | 0.0019980   |
| Papua New Guinea (15) v. Roper River (4)           | 0.3425044 | 0.0049950   |
| Fiji (9) v. Papua New Guinea (15)                  | 0.3391077 | 0.0009990   |
| Adelaide River (18) v. Clarence River (21)         | 0.3375021 | 0.0009990   |
| Adelaide River (18) v. Trinity inlet (4)           | 0.3346570 | 0.0019980   |
| Fiji (9) v. Sri Lanka (12)                         | 0.3337432 | 0.0039960   |
| Blue mud Bay (13) v. Towns River (5)               | 0.3311125 | 0.0069930   |
| Fiji (9) v. Wenlock River (19)                     | 0.3279948 | 0.0009990   |
| Fiji (9) v. Roper River (4)                        | 0.3264978 | 0.0059940   |
| Arabian Sea (19) v. Urauchi River (21)             | 0.3259254 | 0.0009990   |
| Arabian Sea (19) v. Victoria River (21)            | 0.3223922 | 0.0009990   |
| Fiji (9) v. Indonesia (6)                          | 0.3212353 | 0.0009990   |
| Daly River (25) v. Indonesia (6)                   | 0.3204187 | 0.0009990   |
| Sydney Harbour (13) v. Victoria River (21)         | 0.3169697 | 0.0009990   |
| Adelaide River (18) v. Fiji (9)                    | 0.3118569 | 0.0009990   |
| Indonesia (6) v. Wenlock River (19)                | 0.3078026 | 0.0009990   |
| Blue mud Bay (13) v. Roper River (4)               | 0.2955472 | 0.0169830   |
| East Alligator River (17) v. Sydney Harbour (13)   | 0.2940437 | 0.0009990   |
| Arabian Sea (19) v. Sri Lanka (12)                 | 0.2920615 | 0.0019980   |
| Papua New Guinea (15) v. Victoria River (21)       | 0.2898890 | 0.0009990   |
| Fitzroy River (5) v. Trinity inlet (4)             | 0.2881883 | 0.1938062   |
| Arabian Sea (19) v. Towns River (5)                | 0.2872795 | 0.0189810   |
| Arabian Sea (19) v. Papua New Guinea (15)          | 0.2857166 | 0.0009990   |
| East Alligator River (17) v. Papua New Guinea (15) | 0.2770597 | 0.0009990   |
| Fitzroy River (5) v. South Africa (7)              | 0.2758936 | 0.0859141   |
| Arabian Sea (19) v. Sydney Harbour (13)            | 0.2715370 | 0.0009990   |
| Blue mud Bay (13) v. Daly River (25)               | 0.2681789 | 0.0039960   |
| Daly River (25) v. Sydney Harbour (13)             | 0.2588976 | 0.0009990   |
| Papua New Guinea (15) v. Wenlock River (19)        | 0.2565555 | 0.0009990   |
| Arabian Sea (19) v. Roper River (4)                | 0.2562320 | 0.0759241   |
| Arabian Sea (19) v. Okinawa (10)                   | 0.2557410 | 0.0049950   |
| Arabian Sea (19) v. East Alligator River (17)      | 0.2555895 | 0.0009990   |
| Fitzroy River (5) v. Towns River (5)               | 0.2555059 | 0.0039960   |
| Adelaide River (18) v. Indonesia (6)               | 0.2553233 | 0.0109890   |
| Sydney Harbour (13) v. Wenlock River (19)          | 0.2551439 | 0.0009990   |
| Arabian Sea (19) v. Daly River (25)                | 0.2519896 | 0.0009990   |
| Daly River (25) v. Papua New Guinea (15)           | 0.2452140 | 0.0009990   |
| Blue mud Bay (13) v. East Alligator River (17)     | 0.2450737 | 0.0029970   |
| Blue mud Bay (13) v. Wenlock River (19)            | 0.2355891 | 0.0029970   |
| Adelaide River (18) v. Blue mud Bay (13)           | 0.2343158 | 0.0019980   |
| South Alligator River (38) v. Wenlock River (19)   | 0.2331459 | 0.0009990   |
| Arabian Sea (19) v. Trinity inlet (4)              | 0.2277714 | 0.0589411   |
| Arabian Sea (19) v. Wenlock River (19)             | 0.2265136 | 0.0009990   |
| Adelaide River (18) v. Arabian Sea (19)            | 0.2244192 | 0.0009990   |
| Adelaide River (18) v. South Alligator River (38)  | 0.2225027 | 0.0009990   |
| Arabian Sea (19) v. Fiji (9)                       | 0.2193626 | 0.0109890   |
| Reunion (16) v. South Africa (7)                   | 0.2107817 | 0.0049950   |
| Fiji (9) v. Fitzroy River (5)                      | 0.2099277 | 0.0299700   |
| Daly River (25) v. South Alligator River (38)      | 0.2060549 | 0.0009990   |
| Arabian Sea (19) v. Fitzroy River (5)              | 0.2025943 | 0.0419580   |
| Fitzroy River (5) v. Roper River (4)               | 0.1973826 | 0.2187812   |
| Daly River (25) v. Towns River (5)                 | 0.1944328 | 0.0269730   |
| Clarence River (21) v. Sydney Harbour (13)         | 0.1879409 | 0.0049950   |
| Sydney Harbour (13) v. Trinity inlet (4)           | 0.1864946 | 0.1348651   |
| Adelaide River (18) v. Sydney Harbour (13)         | 0.1842047 | 0.0019980   |
| Clarence River (21) v. Fiji (9)                    | 0.1784404 | 0.0029970   |
| Fiji (9) v. Sydney Harbour (13)                    | 0.1783542 | 0.0019980   |

Table 68: Pairwise mtDNA differentiation between Sites (continued)

|                                                         | PHist      | PHist.p.val |
|---------------------------------------------------------|------------|-------------|
| Towns River (5) v. Wenlock River (19)                   | 0.1748255  | 0.0489510   |
| East Alligator River (17) v. Towns River (5)            | 0.1626439  | 0.0699301   |
| Seychelles (18) v. South Africa (7)                     | 0.1586276  | 0.0279720   |
| Adelaide River (18) v. Towns River (5)                  | 0.1562088  | 0.0269730   |
| Adelaide River (18) v. Papua New Guinea (15)            | 0.1528138  | 0.0069930   |
| South Alligator River (38) v. Towns River (5)           | 0.1480850  | 0.0289710   |
| East Alligator River (17) v. South Alligator River (38) | 0.1477612  | 0.0029970   |
| Blue mud Bay (13) v. South Alligator River (38)         | 0.1468654  | 0.0019980   |
| Daly River (25) v. Roper River (4)                      | 0.1454959  | 0.0799201   |
| Arabian Sea (19) v. Indonesia (6)                       | 0.1349157  | 0.1158841   |
| Blue mud Bay (13) v. Victoria River (21)                | 0.1326374  | 0.0089910   |
| Roper River (4) v. Wenlock River (19)                   | 0.1319979  | 0.1258741   |
| Costa Rica (15) v. Gulf of California (1)               | 0.1242849  | 0.1818182   |
| Papua New Guinea (15) v. Sydney Harbour (13)            | 0.1162714  | 0.0229770   |
| South Africa (7) v. Sri Lanka (12)                      | 0.1128273  | 0.1288711   |
| Adelaide River (18) v. Roper River (4)                  | 0.1096056  | 0.1418581   |
| East Alligator River (17) v. Roper River (4)            | 0.1027974  | 0.1088911   |
| Towns River (5) v. Victoria River (21)                  | 0.0734100  | 0.0749251   |
| Victoria River (21) v. Wenlock River (19)               | 0.0692990  | 0.0379620   |
| Daly River (25) v. Victoria River (21)                  | 0.0634446  | 0.0489510   |
| Roper River (4) v. South Alligator River (38)           | 0.0616557  | 0.2297702   |
| South Africa (7) v. Thailand (6)                        | 0.0484505  | 0.1698302   |
| East Alligator River (17) v. Wenlock River (19)         | 0.0435785  | 0.1158841   |
| South Alligator River (38) v. Victoria River (21)       | 0.0423776  | 0.0409590   |
| Adelaide River (18) v. Victoria River (21)              | 0.0387443  | 0.1238761   |
| Fitzroy River (5) v. Thailand (6)                       | 0.0298249  | 0.2457542   |
| East Alligator River (17) v. Victoria River (21)        | 0.0297948  | 0.1508492   |
| Daly River (25) v. Wenlock River (19)                   | 0.0290248  | 0.1338661   |
| Adelaide River (18) v. East Alligator River (17)        | 0.0281864  | 0.1558442   |
| Adelaide River (18) v. Daly River (25)                  | 0.0249065  | 0.1658342   |
| Adelaide River (18) v. Wenlock River (19)               | 0.0178644  | 0.1848152   |
| Roper River (4) v. Victoria River (21)                  | 0.0085205  | 0.2727273   |
| Daly River (25) v. East Alligator River (17)            | 0.0045904  | 0.2987013   |
| Fitzroy River (5) v. Sri Lanka (12)                     | -0.0031832 | 0.2847153   |
| Fiji (9) v. Trinity inlet (4)                           | -0.0134690 | 0.3066933   |
| Clarence River (21) v. Trinity inlet (4)                | -0.0463369 | 0.4815185   |
| Sri Lanka (12) v. Thailand (6)                          | -0.0912389 | 0.6243756   |
| Roper River (4) v. Towns River (5)                      | -0.2264393 | 0.9950050   |
| Gulf of California (1) v. Sierra Leone (1)              | NA         | NA          |

### 13.5.2 PHist per Site

```
strata <- as.character(BS.gt@schemes$Site)
names(strata) <- as.character(BS.gt@schemes$id)
strataG::setStrata(BS.gt) <- strata

fxdiff <- strataG::fixedDifferences(BS.gt, count.indels = TRUE,
                                   consec.indels.as.one = TRUE,
                                   bases = c("a", "c", "g", "t", "-"))
knitr::kable(
  fxdiff$num.fixed[order(fxdiff$num.fixed$num.fixed, decreasing = TRUE)],
  # format = "html",
  caption = "Fixed mtDNA differences between Sites"
) %>%
kableExtra::kable_styling(full_width = FALSE, font_size = 5)

popstr.mt.Site <-
strataG::popStructTest(
  BS.gt,
  nrep = 1000,
  stats = "all",
  type = "both",
  keep.null = FALSE,
  quietly = TRUE,
  max.cores = parallel::detectCores()-1,
  write.output = TRUE
)
save(popstr.mt.Site, file = "Mitogenome_ALL_sites_phist.Rdata")
```

Table 69: Fixed mtDNA differences between Sites

|    | strata.1           | strata.2           | num.fixed |
|----|--------------------|--------------------|-----------|
| 50 | Gulf of California | Reunion            | 146       |
| 51 | Gulf of California | Seychelles         | 146       |
| 78 | Reunion            | Sierra Leone       | 145       |
| 82 | Seychelles         | Sierra Leone       | 145       |
| 47 | Gulf of California | Indonesia          | 144       |
| 48 | Gulf of California | Japan              | 143       |
| 31 | Costa Rica         | Reunion            | 142       |
| 32 | Costa Rica         | Seychelles         | 142       |
| 49 | Gulf of California | Papua New Guinea   | 142       |
| 60 | Indonesia          | Sierra Leone       | 141       |
| 67 | Japan              | Sierra Leone       | 141       |
| 28 | Costa Rica         | Indonesia          | 140       |
| 29 | Costa Rica         | Japan              | 139       |
| 73 | Papua New Guinea   | Sierra Leone       | 139       |
| 30 | Costa Rica         | Papua New Guinea   | 138       |
| 53 | Gulf of California | South Africa       | 113       |
| 86 | Sierra Leone       | South Africa       | 112       |
| 34 | Costa Rica         | South Africa       | 109       |
| 52 | Gulf of California | Sierra Leone       | 107       |
| 55 | Gulf of California | Thailand           | 107       |
| 37 | Fiji               | Gulf of California | 106       |
| 54 | Gulf of California | Sri Lanka          | 106       |
| 16 | Australia          | Gulf of California | 105       |
| 88 | Sierra Leone       | Thailand           | 105       |
| 4  | Arabian Sea        | Gulf of California | 104       |
| 22 | Australia          | Sierra Leone       | 104       |
| 87 | Sierra Leone       | Sri Lanka          | 104       |
| 10 | Arabian Sea        | Sierra Leone       | 103       |
| 33 | Costa Rica         | Sierra Leone       | 103       |
| 43 | Fiji               | Sierra Leone       | 103       |
| 26 | Costa Rica         | Fiji               | 102       |
| 35 | Costa Rica         | Sri Lanka          | 102       |
| 36 | Costa Rica         | Thailand           | 102       |
| 14 | Australia          | Costa Rica         | 101       |
| 2  | Arabian Sea        | Costa Rica         | 100       |
| 65 | Japan              | Reunion            | 78        |
| 66 | Japan              | Seychelles         | 78        |
| 58 | Indonesia          | Reunion            | 76        |
| 59 | Indonesia          | Seychelles         | 76        |
| 71 | Papua New Guinea   | Reunion            | 75        |
| 72 | Papua New Guinea   | Seychelles         | 75        |
| 68 | Japan              | South Africa       | 12        |
| 61 | Indonesia          | South Africa       | 11        |
| 74 | Papua New Guinea   | South Africa       | 10        |
| 27 | Costa Rica         | Gulf of California | 2         |
| 20 | Australia          | Reunion            | 1         |
| 21 | Australia          | Seychelles         | 1         |
| 39 | Fiji               | Japan              | 1         |
| 1  | Arabian Sea        | Australia          | 0         |
| 3  | Arabian Sea        | Fiji               | 0         |
| 5  | Arabian Sea        | Indonesia          | 0         |
| 6  | Arabian Sea        | Japan              | 0         |
| 7  | Arabian Sea        | Papua New Guinea   | 0         |
| 8  | Arabian Sea        | Reunion            | 0         |
| 9  | Arabian Sea        | Seychelles         | 0         |
| 11 | Arabian Sea        | South Africa       | 0         |
| 12 | Arabian Sea        | Sri Lanka          | 0         |
| 13 | Arabian Sea        | Thailand           | 0         |
| 15 | Australia          | Fiji               | 0         |
| 17 | Australia          | Indonesia          | 0         |
| 18 | Australia          | Japan              | 0         |
| 19 | Australia          | Papua New Guinea   | 0         |
| 23 | Australia          | South Africa       | 0         |
| 24 | Australia          | Sri Lanka          | 0         |
| 25 | Australia          | Thailand           | 0         |
| 38 | Fiji               | Indonesia          | 0         |
| 40 | Fiji               | Papua New Guinea   | 0         |
| 41 | Fiji               | Reunion            | 0         |
| 42 | Fiji               | Seychelles         | 0         |
| 44 | Fiji               | South Africa       | 0         |
| 45 | Fiji               | Sri Lanka          | 0         |
| 46 | Fiji               | Thailand           | 0         |
| 56 | Indonesia          | Japan              | 0         |
| 57 | Indonesia          | Papua New Guinea   | 0         |
| 62 | Indonesia          | Sri Lanka          | 0         |
| 63 | Indonesia          | Thailand           | 0         |
| 64 | Japan              | Papua New Guinea   | 0         |
| 69 | Japan              | Sri Lanka          | 0         |
| 70 | Japan              | Thailand           | 0         |
| 75 | Papua New Guinea   | Sri Lanka          | 0         |
| 76 | Papua New Guinea   | Thailand           | 0         |
| 77 | Reunion            | Seychelles         | 0         |
| 79 | Reunion            | South Africa       | 0         |
| 80 | Reunion            | Sri Lanka          | 0         |
| 81 | Reunion            | Thailand           | 0         |
| 83 | Seychelles         | South Africa       | 0         |
| 84 | Seychelles         | Sri Lanka          | 0         |
| 85 | Seychelles         | Thailand           | 0         |
| 89 | South Africa       | Sri Lanka          | 0         |
| 90 | South Africa       | Thailand           | 0         |
| 91 | Sri Lanka          | Thailand           | 0         |



Table 70: Overall mtDNA differentiation between Sites

|       | estimate  | p.val |
|-------|-----------|-------|
| Chi2  | 4667.0000 | 0.987 |
| Fst   | 0.0000    | 1.000 |
| PHist | 0.7858    | 0.001 |

```
readr::write_tsv(popstr.mt.Site$pairwise$result,
  path = "Mitogenome_ALL_sites_phist.txt")

load("Mitogenome_ALL_sites_phist.Rdata")
knitr::kable(
  popstr.mt.Site$overall$result,
  digits = 4,
  # format = "html",
  caption = "Overall mtDNA differentiation between Sites"
) %>%
  kableExtra::kable_styling(full_width = FALSE, font_size = 5)
knitr::kable(
  popstr.mt.Site$pairwise$result[order(popstr.mt.Site$pairwise$result$PHist,
    decreasing = TRUE), -c(1:8)],
  # format = "html",
  digits = 4,
  caption = "Pairwise mtDNA differentiation between Sites"
) %>%
  kableExtra::kable_styling(full_width = FALSE, font_size = 5)
```

### 13.5.3 PHist per region

```
strata <- as.character(BS.gt@schemes$Region)
names(strata) <- as.character(BS.gt@schemes$id)
strataG::setStrata(BS.gt) <- strata

fxdiff <- strataG::fixedDifferences(BS.gt, count.indels = TRUE,
  consec.indels.as.one = TRUE,
  bases = c("a", "c", "g", "t", "-"))
knitr::kable(
  fxdiff$num.fixed[order(fxdiff$num.fixed$num.fixed, decreasing = TRUE), ],
  # format = "html",
  caption = "Fixed mtDNA differences between regions"
) %>%
  kableExtra::kable_styling(full_width = FALSE, font_size = 5)

popstr.mt.pop <-
  strataG::popStructTest(
    BS.gt,
    nrep = 10000,
    stats = "all",
    type = "both",
    keep.null = FALSE,
    quietly = TRUE,
    max.cores = parallel::detectCores()-1,
    write.output = TRUE
  )
save(popstr.mt.pop, file = "Mitogenome_ALL_region_phist.Rdata")
readr::write_tsv(popstr.mt.Site$pairwise$result,
  path = "Mitogenome_ALL_region_phist.txt")
```

Table 71: Pairwise mtDNA differentiation between Sites

|                                                 | PHist   | PHist.p.val |
|-------------------------------------------------|---------|-------------|
| Costa Rica (15) v. Reunion (16)                 | 0.9694  | 0.0010      |
| Gulf of California (1) v. Reunion (16)          | 0.9685  | 0.0699      |
| Reunion (16) v. Sierra Leone (1)                | 0.9685  | 0.0679      |
| Costa Rica (15) v. Seychelles (18)              | 0.9684  | 0.0010      |
| Gulf of California (1) v. Seychelles (18)       | 0.9670  | 0.0480      |
| Seychelles (18) v. Sierra Leone (1)             | 0.9670  | 0.0559      |
| Costa Rica (15) v. Indonesia (6)                | 0.9652  | 0.0010      |
| Costa Rica (15) v. Japan (31)                   | 0.9615  | 0.0010      |
| Costa Rica (15) v. Sierra Leone (1)             | 0.9575  | 0.0470      |
| Gulf of California (1) v. Japan (31)            | 0.9574  | 0.0310      |
| Japan (31) v. Sierra Leone (1)                  | 0.9568  | 0.0410      |
| Gulf of California (1) v. Indonesia (6)         | 0.9512  | 0.1598      |
| Costa Rica (15) v. Papua New Guinea (15)        | 0.9505  | 0.0010      |
| Indonesia (6) v. Sierra Leone (1)               | 0.9505  | 0.1449      |
| Indonesia (6) v. Reunion (16)                   | 0.9409  | 0.0010      |
| Japan (31) v. Reunion (16)                      | 0.9372  | 0.0010      |
| Indonesia (6) v. Seychelles (18)                | 0.9371  | 0.0010      |
| Japan (31) v. Seychelles (18)                   | 0.9339  | 0.0010      |
| Australia (203) v. Costa Rica (15)              | 0.9336  | 0.0010      |
| Gulf of California (1) v. Papua New Guinea (15) | 0.9310  | 0.0689      |
| Australia (203) v. Gulf of California (1)       | 0.9303  | 0.0020      |
| Papua New Guinea (15) v. Sierra Leone (1)       | 0.9300  | 0.0729      |
| Australia (203) v. Sierra Leone (1)             | 0.9293  | 0.0050      |
| Costa Rica (15) v. Fiji (9)                     | 0.9246  | 0.0010      |
| Papua New Guinea (15) v. Reunion (16)           | 0.9190  | 0.0010      |
| Papua New Guinea (15) v. Seychelles (18)        | 0.9161  | 0.0010      |
| Costa Rica (15) v. South Africa (7)             | 0.9130  | 0.0010      |
| Australia (203) v. Reunion (16)                 | 0.8936  | 0.0010      |
| Australia (203) v. Seychelles (18)              | 0.8885  | 0.0010      |
| Costa Rica (15) v. Thailand (6)                 | 0.8866  | 0.0010      |
| Arabian Sea (19) v. Costa Rica (15)             | 0.8773  | 0.0010      |
| Fiji (9) v. Reunion (16)                        | 0.8639  | 0.0010      |
| Fiji (9) v. Seychelles (18)                     | 0.8618  | 0.0010      |
| Japan (31) v. South Africa (7)                  | 0.8587  | 0.0010      |
| Fiji (9) v. Gulf of California (1)              | 0.8483  | 0.1069      |
| Australia (203) v. South Africa (7)             | 0.8474  | 0.0010      |
| Fiji (9) v. Sierra Leone (1)                    | 0.8462  | 0.0969      |
| Costa Rica (15) v. Sri Lanka (12)               | 0.8322  | 0.0010      |
| Arabian Sea (19) v. Gulf of California (1)      | 0.8038  | 0.0529      |
| Arabian Sea (19) v. Sierra Leone (1)            | 0.8019  | 0.0529      |
| Sierra Leone (1) v. South Africa (7)            | 0.7884  | 0.1469      |
| Gulf of California (1) v. South Africa (7)      | 0.7880  | 0.1349      |
| Papua New Guinea (15) v. South Africa (7)       | 0.7819  | 0.0010      |
| Arabian Sea (19) v. Seychelles (18)             | 0.7763  | 0.0010      |
| Arabian Sea (19) v. Reunion (16)                | 0.7757  | 0.0010      |
| Australia (203) v. Thailand (6)                 | 0.7673  | 0.0010      |
| Japan (31) v. Thailand (6)                      | 0.7551  | 0.0010      |
| Indonesia (6) v. South Africa (7)               | 0.7475  | 0.0020      |
| Australia (203) v. Sri Lanka (12)               | 0.6938  | 0.0010      |
| Gulf of California (1) v. Thailand (6)          | 0.6772  | 0.1499      |
| Sierra Leone (1) v. Thailand (6)                | 0.6757  | 0.1588      |
| Gulf of California (1) v. Sri Lanka (12)        | 0.6642  | 0.0669      |
| Sierra Leone (1) v. Sri Lanka (12)              | 0.6623  | 0.0839      |
| Papua New Guinea (15) v. Thailand (6)           | 0.6477  | 0.0010      |
| Fiji (9) v. South Africa (7)                    | 0.6426  | 0.0010      |
| Japan (31) v. Sri Lanka (12)                    | 0.6144  | 0.0010      |
| Reunion (16) v. Seychelles (18)                 | 0.6057  | 0.0010      |
| Arabian Sea (19) v. South Africa (7)            | 0.5898  | 0.0010      |
| Indonesia (6) v. Thailand (6)                   | 0.5499  | 0.0220      |
| Reunion (16) v. Thailand (6)                    | 0.5202  | 0.0010      |
| Fiji (9) v. Japan (31)                          | 0.5153  | 0.0010      |
| Papua New Guinea (15) v. Sri Lanka (12)         | 0.5036  | 0.0010      |
| Japan (31) v. Papua New Guinea (15)             | 0.4933  | 0.0010      |
| Reunion (16) v. Sri Lanka (12)                  | 0.4562  | 0.0010      |
| Fiji (9) v. Thailand (6)                        | 0.4506  | 0.0030      |
| Indonesia (6) v. Papua New Guinea (15)          | 0.4237  | 0.0010      |
| Indonesia (6) v. Japan (31)                     | 0.4090  | 0.0050      |
| Seychelles (18) v. Thailand (6)                 | 0.3994  | 0.0020      |
| Australia (203) v. Japan (31)                   | 0.3989  | 0.0010      |
| Seychelles (18) v. Sri Lanka (12)               | 0.3954  | 0.0010      |
| Arabian Sea (19) v. Australia (203)             | 0.3925  | 0.0010      |
| Indonesia (6) v. Sri Lanka (12)                 | 0.3910  | 0.0290      |
| Arabian Sea (19) v. Thailand (6)                | 0.3866  | 0.0090      |
| Australia (203) v. Fiji (9)                     | 0.3641  | 0.0010      |
| Australia (203) v. Indonesia (6)                | 0.3433  | 0.0030      |
| Fiji (9) v. Papua New Guinea (15)               | 0.3391  | 0.0010      |
| Fiji (9) v. Sri Lanka (12)                      | 0.3337  | 0.0060      |
| Fiji (9) v. Indonesia (6)                       | 0.3212  | 0.0020      |
| Arabian Sea (19) v. Japan (31)                  | 0.3063  | 0.0010      |
| Arabian Sea (19) v. Sri Lanka (12)              | 0.2921  | 0.0060      |
| Arabian Sea (19) v. Papua New Guinea (15)       | 0.2857  | 0.0010      |
| Arabian Sea (19) v. Fiji (9)                    | 0.2194  | 0.0090      |
| Australia (203) v. Papua New Guinea (15)        | 0.2187  | 0.0010      |
| Reunion (16) v. South Africa (7)                | 0.2108  | 0.0060      |
| Seychelles (18) v. South Africa (7)             | 0.1586  | 0.0230      |
| Arabian Sea (19) v. Indonesia (6)               | 0.1349  | 0.1379      |
| Costa Rica (15) v. Gulf of California (1)       | 0.1243  | 0.1588      |
| South Africa (7) v. Sri Lanka (12)              | 0.1128  | 0.1209      |
| South Africa (7) v. Thailand (6)                | 0.0485  | 0.1928      |
| Sri Lanka (12) v. Thailand (6)                  | -0.0912 | 0.6553      |
| Gulf of California (1) v. Sierra Leone (1)      | NA      | NA          |

Table 72: Fixed mtDNA differences between regions

|    | strata.1 | strata.2 | num.fixed |
|----|----------|----------|-----------|
| 4  | E-ATL    | Japan    | 141       |
| 7  | E-ATL    | W-PAC    | 140       |
| 15 | E-PAC    | Japan    | 139       |
| 18 | E-PAC    | W-PAC    | 138       |
| 6  | E-ATL    | W-IO     | 112       |
| 17 | E-PAC    | W-IO     | 109       |
| 1  | E-ATL    | E-IO     | 103       |
| 2  | E-ATL    | E-PAC    | 103       |
| 3  | E-ATL    | Fiji     | 103       |
| 5  | E-ATL    | N-IO     | 103       |
| 14 | E-PAC    | Fiji     | 102       |
| 8  | E-IO     | E-PAC    | 101       |
| 16 | E-PAC    | N-IO     | 100       |
| 24 | Japan    | W-IO     | 12        |
| 28 | W-IO     | W-PAC    | 9         |
| 19 | Fiji     | Japan    | 1         |
| 9  | E-IO     | Fiji     | 0         |
| 10 | E-IO     | Japan    | 0         |
| 11 | E-IO     | N-IO     | 0         |
| 12 | E-IO     | W-IO     | 0         |
| 13 | E-IO     | W-PAC    | 0         |
| 20 | Fiji     | N-IO     | 0         |
| 21 | Fiji     | W-IO     | 0         |
| 22 | Fiji     | W-PAC    | 0         |
| 23 | Japan    | N-IO     | 0         |
| 25 | Japan    | W-PAC    | 0         |
| 26 | N-IO     | W-IO     | 0         |
| 27 | N-IO     | W-PAC    | 0         |

Table 73: Overall mtDNA differentiation between regions

|       | estimate  | p.val  |
|-------|-----------|--------|
| Chi2  | 2513.0000 | 0.3916 |
| Fst   | 0.0000    | 1.0000 |
| PHIst | 0.7576    | 0.0001 |

```
load("Mitogenome_ALL_region_phist.Rdata")
knitr::kable(
  popstr.mt.pop$overall$result,
  digits = 4,
  # format = "html",
  caption = "Overall mtDNA differentiation between regions"
) %>%
kableExtra::kable_styling(full_width = FALSE,font_size = 5)
knitr::kable(
  popstr.mt.pop$pairwise$result[order(popstr.mt.pop$pairwise$result$PHIst,
  decreasing = TRUE), -c(1:8)],
  # format = "html",
  digits = 4,
  caption = "Pairwise mtDNA differentiation between regions"
) %>%
kableExtra::kable_styling(full_width = FALSE,font_size = 5)
```

Table 74: Pairwise mtDNA differentiation between regions

|                          | PHist  | PHist.p.val |
|--------------------------|--------|-------------|
| E-PAC (16) v. Japan (31) | 0.9615 | 0.0001      |
| E-PAC (16) v. W-PAC (38) | 0.9583 | 0.0001      |
| E-ATL (1) v. Japan (31)  | 0.9568 | 0.0305      |
| E-ATL (1) v. E-PAC (16)  | 0.9568 | 0.0582      |
| E-ATL (1) v. W-PAC (38)  | 0.9532 | 0.0228      |
| E-IO (186) v. E-PAC (16) | 0.9334 | 0.0001      |
| E-PAC (16) v. W-IO (41)  | 0.9314 | 0.0001      |
| E-ATL (1) v. E-IO (186)  | 0.9286 | 0.0057      |
| E-PAC (16) v. Fiji (9)   | 0.9261 | 0.0001      |
| E-ATL (1) v. W-IO (41)   | 0.9163 | 0.0233      |
| Japan (31) v. W-IO (41)  | 0.8892 | 0.0001      |
| W-IO (41) v. W-PAC (38)  | 0.8878 | 0.0001      |
| E-IO (186) v. W-IO (41)  | 0.8754 | 0.0001      |
| E-ATL (1) v. Fiji (9)    | 0.8462 | 0.0993      |
| Fiji (9) v. W-IO (41)    | 0.8153 | 0.0001      |
| E-PAC (16) v. N-IO (37)  | 0.7789 | 0.0001      |
| E-ATL (1) v. N-IO (37)   | 0.6815 | 0.0266      |
| Japan (31) v. W-PAC (38) | 0.5398 | 0.0001      |
| N-IO (37) v. W-IO (41)   | 0.5162 | 0.0001      |
| Fiji (9) v. Japan (31)   | 0.5153 | 0.0001      |
| E-IO (186) v. N-IO (37)  | 0.4620 | 0.0001      |
| E-IO (186) v. Fiji (9)   | 0.4045 | 0.0002      |
| E-IO (186) v. Japan (31) | 0.3972 | 0.0001      |
| N-IO (37) v. W-PAC (38)  | 0.3628 | 0.0001      |
| Japan (31) v. N-IO (37)  | 0.3244 | 0.0001      |
| E-IO (186) v. W-PAC (38) | 0.2738 | 0.0001      |
| Fiji (9) v. W-PAC (38)   | 0.1954 | 0.0018      |
| Fiji (9) v. N-IO (37)    | 0.1814 | 0.0427      |

### 13.6 PCA

```
BS.haps <- strataG::labelHaplotypes(x = BS.bin, prefix = "HT",
                                   use.indels = TRUE)
BS.hapdist <- dist(BS.haps$hap.seqs)
table(BS.haps$haps)
x <- ape::pcoa(BS.hapdist, correction = "none", rn = NULL)
biplot(x, Y = NULL, plot.axes = c(1,2), dir.axis1 = 1,
       dir.axis2 = 1, rn = NULL, main = NULL)
```

#### PCoA ordination

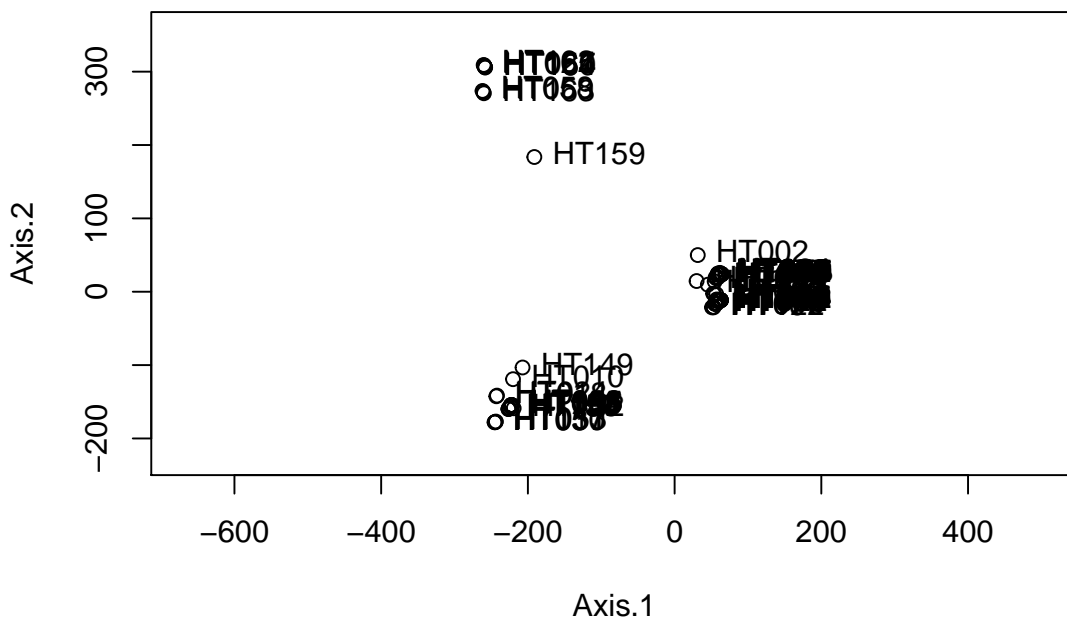

```
pco1 <- dudi.pco(BS.hapdist, scannf = FALSE, nf = 2)
scatter(pco1, posi = "bottomleft")
```

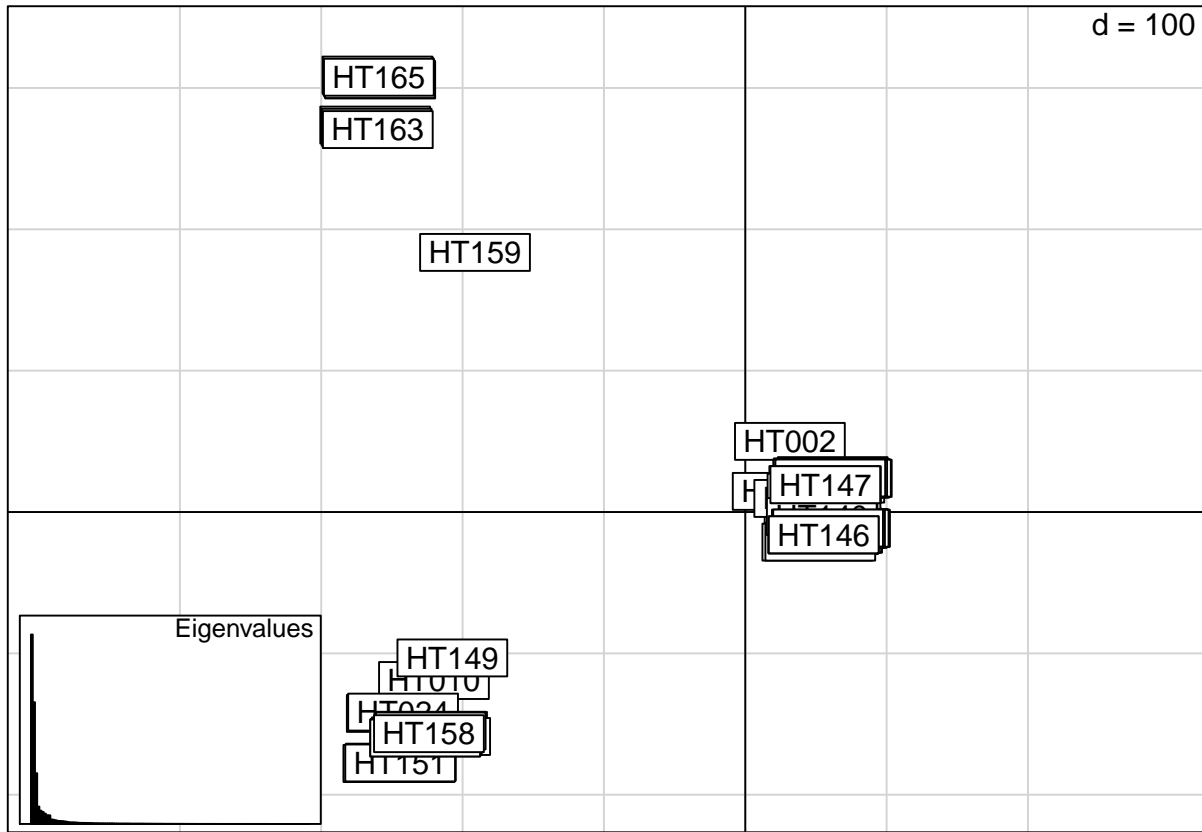

```
##
## HT001 HT002 HT003 HT004 HT005 HT006 HT007 HT008 HT009 HT010 HT011 HT012 HT013
## 19 13 12 11 10 9 8 7 7 7 6 5 5
## HT014 HT015 HT016 HT017 HT018 HT019 HT020 HT021 HT022 HT023 HT024 HT025 HT026
## 5 5 5 5 5 4 4 4 4 4 4 4 3
## HT027 HT028 HT029 HT030 HT031 HT032 HT033 HT034 HT035 HT036 HT037 HT038 HT039
## 3 3 3 3 3 3 3 3 3 3 3 3 2
## HT040 HT041 HT042 HT043 HT044 HT045 HT046 HT047 HT048 HT049 HT050 HT051 HT052
## 2 2 2 2 2 2 2 2 2 2 2 2 2
## HT053 HT054 HT055 HT056 HT057 HT058 HT059 HT060 HT061 HT062 HT063 HT064 HT065
## 2 2 2 2 2 2 2 2 1 1 1 1 1
## HT066 HT067 HT068 HT069 HT070 HT071 HT072 HT073 HT074 HT075 HT076 HT077 HT078
## 1 1 1 1 1 1 1 1 1 1 1 1 1
## HT079 HT080 HT081 HT082 HT083 HT084 HT085 HT086 HT087 HT088 HT089 HT090 HT091
## 1 1 1 1 1 1 1 1 1 1 1 1 1
## HT092 HT093 HT094 HT095 HT096 HT097 HT098 HT099 HT100 HT101 HT102 HT103 HT104
## 1 1 1 1 1 1 1 1 1 1 1 1 1
## HT105 HT106 HT107 HT108 HT109 HT110 HT111 HT112 HT113 HT114 HT115 HT116 HT117
## 1 1 1 1 1 1 1 1 1 1 1 1 1
## HT118 HT119 HT120 HT121 HT122 HT123 HT124 HT125 HT126 HT127 HT128 HT129 HT130
## 1 1 1 1 1 1 1 1 1 1 1 1 1
## HT131 HT132 HT133 HT134 HT135 HT136 HT137 HT138 HT139 HT140 HT141 HT142 HT143
## 1 1 1 1 1 1 1 1 1 1 1 1 1
## HT144 HT145 HT146 HT147 HT148 HT149 HT150 HT151 HT152 HT153 HT154 HT155 HT156
## 1 1 1 1 1 1 1 1 1 1 1 1 1
## HT157 HT158 HT159 HT160 HT161 HT162 HT163 HT164 HT165
## 1 1 1 1 1 1 1 1 1
```

## 14 References

- Benestan, L., Moore, J. S., Sutherland, B. J. G., Le Luyer, J., Maaroufi, H., Rougeux, C., . . . Bernatchez, L. (2017). Sex matters in massive parallel sequencing: Evidence for biases in genetic parameter estimation and investigation of sex determination systems. *Molecular Ecology*, 26(24), 6767–6783. doi:10.1111/mec.14217
- Devloo-Delva, F., Maes, G. E., Hernández, S. I., McAllister, J. D., Gunasekera, R. M., Grewe, P. M., . . . Feutry, P. (2019). Accounting for kin sampling reveals genetic connectivity in Tasmanian and New Zealand school sharks, *Galeorhinus galeus*. *Ecology and Evolution*, 9, 4465-4472. doi:10.1002/ece3.5012
- Devloo-Delva, F., Kyne, P. M., Marthick, J. R., Grant, M. I., Gunasekera, R. M., Johnson, G. J., . . . Feutry, P. (under review). Sex-specific dispersal patterns of the threatened Northern River Shark. *Heredity*
- Devloo-Delva, F., Gosselin, T., Butcher, P. A., Grewe, P. M., Huverneers, C., Thomson, R. B., . . . Feutry, P. (2022 preprint). An R-based tool for identifying sex-linked markers from Restriction Site-Associated DNA sequencing with applications to elasmobranch conservation. doi:Preprint at <https://doi.org/10.21203/rs.3.rs-1797792/v1>
- Feutry, P., Berry, O., Kyne, P. M., Pillans, R. D., Hillary, R. M., Grewe, P. M., . . . Bravington, M. (2017). Inferring contemporary and historical genetic connectivity from juveniles. *Molecular Ecology*, 26(2), 444-456. doi:10.1111/mec.13929
- Feutry, P., Devloo-Delva, F., Tran Lu Y, A., Mona, S., Gunasekera, R. M., Johnson, G., . . . Kyne, P. M. (2020). One panel to rule them all: DArTcap genotyping for population structure, historical demography, and kinship analyses, and its application to a threatened shark. *Molecular Ecology Resources*, 20, 1470–1485.
- Foster, S. D., Feutry, P., Grewe, P. M., Berry, O., Hui, F. K., & Davies, C. R. (2018). Reliably discriminating stock structure with genetic markers: Mixture models with robust and fast computation. *Molecular Ecology Resources*, 1–16.
- Puechmaille, S. J. (2016). The program structure does not reliably recover the correct population structure when sampling is uneven: subsampling and new estimators alleviate the problem. *Molecular Ecology Resources*, 16(3), 608-627.
- Ritland, K. (1996). Estimators for pairwise relatedness and individual inbreeding coefficients. *Genetics Research*, 67(2), 175-185.
- Tillett, B. J., Meekan, M. G., Field, I. C., Hua, Q., & Bradshaw, C. J. A. (2011). Similar life history traits in bull (*Carcharhinus leucas*) and pig-eye (*C. amboinensis*) sharks. *Marine and Freshwater Research*, 62(7), 850-860.

## 15 Citations for packages

```
packages <- c(
  "radiator",
  "ggplot2",
  "dplyr",
  "tidyverse",
  "ade4",
  "adegenet",
  "ape",
  "apex",
  "assigner",
  "assignPOP",
  "dartR",
  "haplotypes",
  "data.table",
  "ggplot2",
  "grid",
```

```

"gridExtra",
"gtools",
"kableExtra",
"knitr",
"magrittr",
"marmap",
"mvbutils",
"OutFLANK",
"pegas",
"qvalue",
"rubias",
"strataG",
"vegan"
)
for (P in packages) {
p <- utils::citation(P)
print(attr(unclass(p)[[1]], "textVersion"))
}

```

```

## [1] "Gosselin, T. (2020). radiator: RADseq Data Exploration, Manipulation and Visualization using
## [1] "H. Wickham. ggplot2: Elegant Graphics for Data Analysis. Springer-Verlag New York, 2016."
## [1] "Hadley Wickham, Romain François, Lionel Henry and Kirill Müller (2021). dplyr: A Grammar of
## [1] "Wickham et al., (2019). Welcome to the tidyverse. Journal of Open Source Software, 4(43), 16
## NULL
## [1] "Jombart, T. (2008) adegenet: a R package for the multivariate analysis of genetic markers. B
## [1] "Paradis E. & Schliep K. 2019. ape 5.0: an environment for modern phylogenetics and evolution
## [1] "Klaus Schliep, Thibaut Jombart, Zhian Namir Kamvar, Eric Archer and Rebecca Harris (2020). a
## [1] "Gosselin, T, Anderson, E. C., Bradbury, I. (2020). assigner: Assignment Analysis with GBS/RA
## [1] "Kuan-Yu Chen, Elizabeth A. Marschall, Michael G. Sovic, Anthony C. Fries, H. Lisle Gibbs and
## [1] "Gruber, B, Unmack, PJ, Berry, OF, Georges, A. dartr: An r package to facilitate analysis of
## [1] "Caner Aktas (2020). haplotypes: Manipulating DNA Sequences and Estimating Unambiguous Haplot
## [1] "Matt Dowle and Arun Srinivasan (2021). data.table: Extension of `data.frame`. R package vers
## [1] "H. Wickham. ggplot2: Elegant Graphics for Data Analysis. Springer-Verlag New York, 2016."
## [1] "R Core Team (2020). R: A language and environment for statistical computing. R Foundation fo
## [1] "Baptiste Auguie (2017). gridExtra: Miscellaneous Functions for \"Grid\" Graphics. R package
## [1] "Gregory R. Warnes, Ben Bolker and Thomas Lumley (2020). gtools: Various R Programming Tools.
## [1] "Hao Zhu (2021). kableExtra: Construct Complex Table with 'kable' and Pipe Syntax. R package
## [1] "Yihui Xie (2021). knitr: A General-Purpose Package for Dynamic Report Generation in R. R pac
## [1] "Stefan Milton Bache and Hadley Wickham (2020). magrittr: A Forward-Pipe Operator for R. R pa
## [1] "Eric Pante, Benoit Simon-Bouhet (2013) marmap: A Package for Importing, Plotting and Analyzi
## [1] "Mark V. Bravington (2018). mvbutils: Workspace Organization, Code and Documentation Editing,
## [1] "Michael C. Whitlock and Katie Lotterhos (2014). OutFLANK: Fst outliers with trimming. R pack
## [1] "Paradis E. 2010. pegas: an R package for population genetics with an integrated-modular appr
## [1] "John D. Storey, Andrew J. Bass, Alan Dabney and David Robinson (2020). qvalue: Q-value estim
## [1] "Moran, BM and Anderson, EC. 2018. Bayesian inference from the conditional genetic stock iden
## [1] "Archer, F. I., Adams, P. E. and Schneiders, B. B. (2016) strataG: An R package for manipulat
## [1] "Jari Oksanen, F. Guillaume Blanchet, Michael Friendly, Roeland Kindt, Pierre Legendre, Dan M

```

## 16 Session Info

```
sessioninfo::session_info()
```

```
## - Session info -----
## setting value
## version R version 4.0.2 (2020-06-22)
## os      Ubuntu 18.04.1 LTS
## system x86_64, linux-gnu
## ui      X11
## language (EN)
## collate en_AU.UTF-8
## ctype   en_AU.UTF-8
## tz      Australia/Canberra
## date    2022-07-11
##
## - Packages -----
## package      * version      date      lib
## ade4          * 1.7-15       2020-02-13 [2]
## adegnet       * 2.1.3        2020-05-10 [2]
## adehabitatMA  0.3.14       2020-01-13 [1]
## ape           * 5.6-1        2022-01-07 [1]
## apex         * 1.0.4        2020-04-11 [1]
## assertthat    0.2.1        2019-03-21 [2]
## assigner     * 0.5.8        2020-10-30 [1]
## assignPOP    * 1.2.2        2020-11-17 [1]
## backports     1.4.1        2021-12-13 [1]
## bit           4.0.3        2020-07-30 [2]
## bit64        0.9-7.1      2020-07-15 [2]
## blob         1.2.1        2020-01-20 [2]
## boot         1.3-25       2020-04-26 [2]
## broom        0.7.6        2021-04-05 [1]
## cachem       1.0.5        2021-05-15 [1]
## calibrate    1.7.7        2020-06-19 [1]
## callr       3.7.0        2021-04-20 [1]
## caret       6.0-86       2020-03-20 [2]
## cellranger   1.1.0        2016-07-27 [2]
## class        7.3-17       2020-04-26 [2]
## classInt     0.4-3        2020-04-07 [2]
## cli          3.3.0        2022-04-25 [1]
## cluster      2.1.0        2019-06-19 [2]
## coda         0.19-4       2020-09-30 [1]
## codetools    0.2-16       2018-12-24 [2]
## colorspace   2.0-2        2021-06-24 [1]
## combinat     0.0-8        2012-10-29 [2]
## crayon       1.4.2        2021-10-29 [1]
## dartR        * 1.9.9.1     2022-01-13 [1]
## data.table   * 1.14.2      2021-09-27 [1]
## DBI          1.1.2        2021-12-20 [1]
## dbplyr       2.1.1        2021-04-06 [1]
## deldir       1.0-6        2021-10-23 [1]
## DEoptimR     1.0-8        2016-11-19 [2]
## desc        1.3.0        2021-03-05 [2]
## devtools     2.4.1        2021-05-05 [1]
## digest       0.6.27       2020-10-24 [2]
## dismo        1.3-3        2020-11-17 [1]
## doParallel   1.0.15       2019-08-02 [2]
## dplyr        * 1.0.6       2021-05-05 [1]
```



|               |           |            |     |
|---------------|-----------|------------|-----|
| ## e1071      | 1.7-9     | 2021-09-16 | [1] |
| ## ellipsis   | 0.3.2     | 2021-04-29 | [1] |
| ## evaluate   | 0.14      | 2019-05-28 | [2] |
| ## expm       | 0.999-6   | 2021-01-13 | [1] |
| ## fansi      | 1.0.0     | 2022-01-10 | [1] |
| ## farver     | 2.1.0     | 2021-02-28 | [1] |
| ## fastmap    | 1.1.0     | 2021-01-25 | [1] |
| ## fastmatch  | 1.1-0     | 2017-01-28 | [2] |
| ## forcats    | * 0.5.1   | 2021-01-27 | [1] |
| ## foreach    | 1.5.0     | 2020-03-30 | [2] |
| ## foreign    | * 0.8-80  | 2020-05-24 | [2] |
| ## formatR    | * 1.7     | 2019-06-11 | [2] |
| ## fossil     | * 0.4.0   | 2020-03-23 | [1] |
| ## fs         | 1.5.2     | 2021-12-08 | [1] |
| ## gap        | 1.2.3-1   | 2021-04-21 | [1] |
| ## gdata      | 2.18.0    | 2017-06-06 | [2] |
| ## gdistance  | 1.3-6     | 2020-06-29 | [1] |
| ## gdsfmt     | 1.26.1    | 2020-12-22 | [1] |
| ## generics   | 0.1.1     | 2021-10-25 | [1] |
| ## genetics   | 1.3.8.1.3 | 2021-03-01 | [1] |
| ## GGally     | 2.0.0     | 2020-06-06 | [2] |
| ## ggplot2    | * 3.3.3   | 2020-12-30 | [1] |
| ## glue       | 1.6.0     | 2021-12-17 | [1] |
| ## gmodels    | 2.18.1    | 2018-06-25 | [2] |
| ## gower      | 0.2.2     | 2020-06-23 | [2] |
| ## gridExtra  | * 2.3     | 2017-09-09 | [2] |
| ## gtable     | 0.3.0     | 2019-03-25 | [2] |
| ## gtools     | * 3.8.2   | 2020-03-31 | [2] |
| ## haplotypes | * 1.1.2   | 2020-02-28 | [1] |
| ## haven      | 2.4.1     | 2021-04-23 | [1] |
| ## hierfstat  | 0.5-10    | 2021-11-17 | [1] |
| ## hms        | 1.1.0     | 2021-05-17 | [1] |
| ## htmltools  | 0.5.1.1   | 2021-01-22 | [1] |
| ## httpuv     | 1.5.4     | 2020-06-06 | [2] |
| ## httr       | 1.4.2     | 2020-07-20 | [2] |
| ## igraph     | 1.2.11    | 2022-01-04 | [1] |
| ## ipred      | 0.9-9     | 2019-04-28 | [2] |
| ## iterators  | 1.0.12    | 2019-07-26 | [2] |
| ## jsonlite   | 1.7.2     | 2020-12-09 | [1] |
| ## kableExtra | * 1.3.4   | 2021-02-20 | [1] |
| ## KernSmooth | 2.23-17   | 2020-04-26 | [2] |
| ## knitr      | * 1.33    | 2021-04-24 | [1] |
| ## labeling   | 0.4.2     | 2020-10-20 | [1] |
| ## later      | 1.1.0.1   | 2020-06-05 | [2] |
| ## lattice    | * 0.20-41 | 2020-04-02 | [2] |
| ## lava       | 1.6.7     | 2020-03-05 | [2] |
| ## LearnBayes | 2.15.1    | 2018-03-18 | [2] |
| ## lifecycle  | 1.0.0     | 2021-02-15 | [1] |
| ## lubridate  | 1.7.10    | 2021-02-26 | [1] |
| ## magrittr   | * 2.0.1   | 2020-11-17 | [1] |
| ## mapdata    | 2.3.0     | 2018-03-30 | [2] |
| ## maps       | * 3.3.0   | 2018-04-03 | [2] |
| ## marmap     | * 1.0.5   | 2020-11-19 | [1] |
| ## MASS       | 7.3-51.6  | 2020-04-26 | [2] |
| ## Matrix     | 1.2-18    | 2019-11-27 | [2] |
| ## memoise    | 2.0.0     | 2021-01-26 | [2] |
| ## mgcv       | 1.8-31    | 2019-11-09 | [2] |
| ## mime       | 0.12      | 2021-09-28 | [1] |

```

## mmod 1.3.3 2017-04-06 [1]
## ModelMetrics 1.2.2.2 2020-03-17 [2]
## modelr 0.1.8 2020-05-19 [2]
## munsell 0.5.0 2018-06-12 [2]
## mvbutils * 2.8.372 2021-05-18 [1]
## mvtnorm 1.1-1 2020-06-09 [2]
## ncdf4 1.17 2019-10-23 [2]
## network 1.16.0 2019-12-01 [2]
## nlme 3.1-148 2020-05-24 [2]
## nnet 7.3-14 2020-04-26 [2]
## OutFLANK * 0.2 2020-10-30 [1]
## pegas * 1.0-1 2021-05-17 [1]
## permute * 0.9-5 2019-03-12 [2]
## phangorn * 2.5.5 2019-06-19 [2]
## pillar 1.6.1 2021-05-16 [1]
## pkgbuild 1.2.0 2020-12-15 [2]
## pkgconfig 2.0.3 2019-09-22 [2]
## pkgload 1.2.1 2021-04-06 [2]
## plotrix 3.8-2 2021-09-08 [1]
## plyr 1.8.6 2020-03-03 [2]
## png 0.1-7 2013-12-03 [2]
## PopGenReport 3.0.4 2019-02-04 [1]
## prettyunits 1.1.1 2020-01-24 [2]
## pROC 1.16.2 2020-03-19 [2]
## processx 3.5.2 2021-04-30 [1]
## prodlim 2019.11.13 2019-11-17 [2]
## promises 1.2.0.1 2021-02-11 [1]
## proxy 0.4-26 2021-06-07 [1]
## ps 1.6.0 2021-02-28 [1]
## purrr * 0.3.4 2020-04-17 [2]
## quadprog 1.5-8 2019-11-20 [2]
## qvalue * 2.20.0 2020-04-27 [2]
## R.cache 0.15.0 2021-04-30 [1]
## R.methodsS3 1.8.1 2020-08-26 [1]
## R.oo 1.24.0 2020-08-26 [1]
## R.utils 2.11.0 2021-09-26 [1]
## R6 2.5.1 2021-08-19 [1]
## radiator * 1.1.9 2021-05-18 [1]
## randomForest 4.6-14 2018-03-25 [2]
## raster 3.4-10 2021-05-03 [1]
## RColorBrewer 1.1-2 2014-12-07 [2]
## Rcpp 1.0.7 2021-07-07 [1]
## RcppParallel 5.0.2 2020-06-24 [2]
## readr * 1.4.0 2020-10-05 [1]
## readxl 1.3.1 2019-03-13 [2]
## recipes 0.1.13 2020-06-23 [2]
## remotes 2.3.0 2021-04-01 [1]
## reprex 2.0.0 2021-04-02 [1]
## reshape 0.8.8 2018-10-23 [2]
## reshape2 1.4.4 2020-04-09 [2]
## rgdal 1.5-28 2021-12-15 [1]
## RgoogleMaps 1.4.5.3 2020-02-12 [1]
## rlang 0.4.11 2021-04-30 [1]
## rmarkdown 2.8 2021-05-07 [1]
## robustbase 0.93-6 2020-03-23 [2]
## rpart 4.1-15 2019-04-12 [2]
## rprojroot 2.0.2 2020-11-15 [1]
## RSQLite 2.2.0 2020-01-07 [2]

```

```

## rstudioapi      0.13      2020-11-12 [1]
## rubias          * 0.3.2      2021-01-15 [1]
## rvest           1.0.0      2021-03-09 [1]
## scales          1.1.1      2020-05-11 [2]
## seqinr          3.6-1      2019-09-07 [2]
## sessioninfo     1.1.1      2018-11-05 [2]
## sf               1.0-3      2021-10-07 [1]
## shape           1.4.4      2018-02-07 [2]
## shapefiles      * 0.7        2013-01-26 [2]
## shiny           1.5.0      2020-06-23 [2]
## sna             2.5        2019-12-10 [2]
## SNPRelate       1.22.0     2020-04-27 [1]
## sp              * 1.4-5      2021-01-10 [1]
## spData          0.3.8      2020-07-03 [2]
## spdep           1.1-5      2020-06-29 [2]
## StAMPP          1.6.2      2021-04-26 [1]
## statnet.common  4.3.0      2019-06-02 [2]
## strataG         * 2.5.01    2021-03-23 [1]
## stringi         1.6.2      2021-05-17 [1]
## stringr         * 1.4.0      2019-02-10 [2]
## styler          * 1.7.0      2022-03-13 [1]
## survival        3.1-12    2020-04-10 [2]
## svglite         2.0.0      2021-02-20 [1]
## swfscMisc       1.4.3      2021-03-15 [1]
## systemfonts     1.0.2      2021-05-11 [1]
## testthat        3.0.2      2021-02-14 [2]
## tibble          * 3.1.2      2021-05-16 [1]
## tidyr           * 1.1.3      2021-03-03 [1]
## tidyselect      1.1.1      2021-04-30 [1]
## tidyverse       * 1.3.1      2021-04-15 [1]
## timeDate        3043.102   2018-02-21 [2]
## tree            1.0-40     2019-04-26 [2]
## units           0.7-2      2021-06-08 [1]
## usethis         2.0.1      2021-02-10 [2]
## utf8            1.2.1      2021-03-12 [1]
## vctrs           0.3.8      2021-04-29 [1]
## vegan           * 2.5-7      2020-11-28 [1]
## viridisLite     0.4.0      2021-04-13 [1]
## webshot         0.5.2      2019-11-22 [1]
## withr           2.4.2      2021-04-18 [1]
## xfun            0.31       2022-05-10 [1]
## xml2            1.3.2      2020-04-23 [2]
## xtable          1.8-4      2019-04-21 [2]
## yaml            2.2.1      2020-02-01 [2]
## source
## CRAN (R 4.0.2)
## Github (thierygosselin/assigner@d39a692)
## CRAN (R 4.0.2)

```







```
## CRAN (R 4.0.2)
##
## [1] /home/dev093/R/x86_64-pc-linux-gnu-library/4.0
## [2] /apps/R/4.0.2/lib/R/library
```
